# Supplementary material
Source: Preprints.org preprint supplement (doi:10.20944/preprints202108.0327.v2)
Supplement: Supplementary file 1 [file Supplementary file 1.xlsx]

## Sheet: FBLs in E2F1map & Ranking Score
Three node feedback loops in E2F1 map				Topological and non-topological properties of each feedback loop					Prioritization score
Type	Node1	Node2	Node3	Average Degree	Average Betweenness Centrality	Numer of nodes in Melanoma cancer pathway (KEGG)	Gene Prioritization Score	Average Log2 fold change in invasive Melanoma cancer cell lines (Mel147, Mel103)	Scenario 1	Scenario 2	Scenario 3	Scenario 4	Scenario 5	Scenario 6	Scenario 7	Scenario 8	Scenario 9	Scenario 10	Scenario 11	Scenario 12	Scenario 13
(-)	AKT1	MAP3K5	E2F1	161.667	0.107794	1	0.0036023	1.0443	0.738378	0.570368	0.471624	0.538313	0.370385	0.49631	0.454349	0.517312	0.433348	0.47533	0.443848	0.48583	0.461759
(-)	AKT1	SETDB1	E2F1	157.333	0.10624	1	0.0036023	1.0443	0.723597	0.570368	0.471624	0.534617	0.370385	0.49631	0.452501	0.515464	0.433348	0.474406	0.442924	0.483982	0.458064
(-)	APC	CTNNB1	AXIN2	21	0.00856525	0	0.00328091	0	0.0755184	0.519482	0	0.0188796	0	0.12987	0.00943979	0.074375	0.0649352	0.0696551	0.0371875	0.0419074	0.14875
(-)	APC	CTNNB1	GSK3B	26.6667	0.0158399	0	0.0044864	0	0.114515	0.710352	0	0.0286288	0	0.177588	0.0143144	0.103108	0.088794	0.0959512	0.0515542	0.0587114	0.206217
(-)	APC	E2F1	AXIN2	151.333	0.0953151	1	0.00275957	1.0443	0.670218	0.436936	0.471624	0.521273	0.370385	0.462952	0.445829	0.492112	0.416669	0.45439	0.431249	0.468971	0.411361
(-)	APC	E2F2	AXIN2	78.3333	0.00568966	0	0	0	0.183189	0	0	0.0457972	0	0	0.0228986	0.0228986	0	0.0114493	0.0114493	0.0228986	0.0457972
(-)	APC	E2F3	AXIN2	82.6667	0.00920012	0	0	0	0.20531	0	0	0.0513276	0	0	0.0256638	0.0256638	0	0.0128319	0.0128319	0.0256638	0.0513276
(-)	APC	GSK3B	AXIN2	20.6667	0.00974592	0	0.00120549	0	0.0792586	0.19087	0	0.0198146	0	0.0477176	0.00990732	0.0337661	0.0238588	0.0288124	0.0168831	0.0218367	0.0675322
(-)	APC	GSK3B	CTNNB1	26.6667	0.0158399	0	0.0044864	0	0.114515	0.710352	0	0.0286288	0	0.177588	0.0143144	0.103108	0.088794	0.0959512	0.0515542	0.0587114	0.206217
(-)	AR	CCNA2	E2F1	158.333	0.0954837	1	0.00275957	1.67933	0.685313	0.436936	0.758415	0.74014	0.585478	0.678045	0.662809	0.709093	0.631762	0.670427	0.647285	0.685951	0.486833
(-)	AR	CDK1	E2F1	155	0.09517	1	0.00275957	1.0443	0.677249	0.436936	0.471624	0.523031	0.370385	0.462952	0.446708	0.492991	0.416669	0.45483	0.431688	0.46985	0.413119
(-)	ATM	E2F1	hsa-miR-18a-5p	147.333	0.095066	1	0.00275957	1.39972	0.661019	0.436936	0.632139	0.639359	0.490771	0.583338	0.565065	0.611348	0.537054	0.574201	0.55106	0.588207	0.44919
(-)	ATM	MDM2	E2F1	155	0.0977802	2	0.00413258	1.39972	0.68704	0.65433	0.632139	0.645864	0.507437	0.637687	0.576651	0.641775	0.572562	0.607169	0.574606	0.609213	0.526711
(-)	ATR	E2F1	E2F6	149	0.0945223	1	0.00275957	1.0443	0.662423	0.436936	0.471624	0.519324	0.370385	0.462952	0.444854	0.491138	0.416669	0.453903	0.430761	0.467996	0.409412
(-)	AURKA	BRCA1	E2F1	153.667	0.0958399	1	0.00275957	1.43259	0.677007	0.436936	0.646985	0.654491	0.501906	0.594473	0.578198	0.624482	0.548189	0.586336	0.563194	0.60134	0.456899
(-)	AURKA	GSK3B	E2F1	155.667	0.102714	1	0.00396506	1.0443	0.706924	0.627806	0.471624	0.530449	0.370385	0.51067	0.450417	0.520559	0.440527	0.480543	0.445472	0.485488	0.468255
(-)	AURKA	PPP1CA	E2F1	149.333	0.0948791	1	0.00275957	1.0443	0.66445	0.436936	0.471624	0.519831	0.370385	0.462952	0.445108	0.491391	0.416669	0.45403	0.430888	0.46825	0.409919
(-)	AURKA	PPP1CB	E2F1	147.333	0.0947496	1	0.00275957	1.0443	0.659832	0.436936	0.471624	0.518676	0.370385	0.462952	0.444531	0.490814	0.416669	0.453741	0.4306	0.467672	0.408765
(-)	AURKA	PPP1CC	E2F1	148.667	0.0948327	1	0.00275957	1.0443	0.662898	0.436936	0.471624	0.519443	0.370385	0.462952	0.444914	0.491197	0.416669	0.453933	0.430791	0.468056	0.409531
(-)	AURKA	PPP2CA	E2F1	149.667	0.0947646	1	0.00275957	1.0443	0.664709	0.436936	0.471624	0.519895	0.370385	0.462952	0.44514	0.491424	0.416669	0.454046	0.430904	0.468282	0.409984
(-)	AURKA	PPP2CB	E2F1	147.667	0.0947504	1	0.00275957	1.0443	0.660524	0.436936	0.471624	0.518849	0.370385	0.462952	0.444617	0.490901	0.416669	0.453785	0.430643	0.467759	0.408938
(-)	AURKA	hsa-miR-17-5p	E2F1	152	0.0954738	1	0.00275957	1.0443	0.672191	0.436936	0.471624	0.521766	0.370385	0.462952	0.446075	0.492359	0.416669	0.454514	0.431372	0.469217	0.411854
(-)	AXIN2	CTNNB1	LEF1	21.3333	0.0112981	0	0.00541637	0	0.0864586	0.8576	0	0.0216146	0	0.2144	0.0108073	0.118007	0.1072	0.112604	0.0590036	0.0644073	0.236015
(-)	BCL2	TP53	E2F1	201.333	0.128925	1	0.00494273	1.0443	0.899601	0.782606	0.471624	0.578618	0.370385	0.54937	0.474502	0.563994	0.459877	0.511936	0.467189	0.519248	0.555124
(-)	BMI1	EZH2	E2F1	155.333	0.0955492	1	0.00359903	1.65134	0.67936	0.569852	0.745776	0.729172	0.575998	0.701795	0.652585	0.715483	0.638896	0.67719	0.645741	0.684034	0.515414
(-)	BMI1	RNF2	E2F1	148	0.0939536	1	0.00275957	1.0443	0.658223	0.436936	0.471624	0.518274	0.370385	0.462952	0.444329	0.490613	0.416669	0.453641	0.430499	0.467471	0.408363
(-)	BRCA1	E2F1	hsa-miR-15a-5p	153.667	0.0948867	1	0.00275957	1.43259	0.673432	0.436936	0.646985	0.653597	0.501906	0.594473	0.577751	0.624035	0.548189	0.586112	0.56297	0.600893	0.456005
(-)	BRCA1	E2F1	hsa-miR-16-5p	156.333	0.0954659	1	0.00275957	1.43259	0.681114	0.436936	0.646985	0.655517	0.501906	0.594473	0.578712	0.624995	0.548189	0.586592	0.56345	0.601853	0.457925
(-)	BRD7	TP53	hsa-miR-200c-3p	49.6667	0.0315601	1	0.00333803	0	0.221005	0.528525	0	0.0552513	0.0166667	0.132131	0.035959	0.0936913	0.074399	0.0840451	0.055179	0.0648251	0.204049
(-)	BTG3	E2F1	TP53	184	0.123628	2	0.00494273	1.0443	0.843917	0.782606	0.471624	0.564697	0.387052	0.54937	0.475874	0.557034	0.468211	0.512622	0.472043	0.516454	0.55787
(-)	CBX5	RBBP4	E2F1	145.333	0.0940351	1	0.00275957	1.47897	0.65302	0.436936	0.667929	0.664201	0.517613	0.610181	0.590907	0.637191	0.563897	0.600544	0.577402	0.614049	0.456138
(-)	CCNA2	CDK1	CDC20	20.6667	0.00295341	0	0	0.635029	0.0537785	0	0.286791	0.228538	0.215093	0.215093	0.221816	0.221816	0.215093	0.218454	0.218454	0.221816	0.0851424
(-)	CCNA2	CDK1	E2F1	156.667	0.0952579	1	0.00275957	1.67933	0.681023	0.436936	0.758415	0.739067	0.585478	0.678045	0.662273	0.708556	0.631762	0.670159	0.647017	0.685414	0.48576
(-)	CCNA2	CDK2	SKP2	33.6667	0.00748179	0	0.000730613	1.54778	0.0976249	0.115681	0.699008	0.548662	0.524256	0.553176	0.536459	0.550919	0.538716	0.544818	0.537588	0.543689	0.228079
(-)	CCNA2	E2F1	CDC25A	157.667	0.0953606	1	0.00275957	1.67933	0.683474	0.436936	0.758415	0.73968	0.585478	0.678045	0.662579	0.708863	0.631762	0.670312	0.64717	0.685721	0.486373
(-)	CCNA2	E2F1	E2F2	218	0.0984823	1	0.00275957	1.67933	0.819839	0.436936	0.758415	0.773771	0.585478	0.678045	0.679625	0.725908	0.631762	0.678835	0.655693	0.702767	0.520464
(-)	CCNA2	RBL1	E2F1	155	0.0952768	1	0.00275957	1.67933	0.67765	0.436936	0.758415	0.738224	0.585478	0.678045	0.661851	0.708135	0.631762	0.669948	0.646806	0.684993	0.484917
(-)	CCNB1	CDC20	CDK1	19.6667	0.00308796	0	0	0.821979	0.0522172	0	0.371221	0.29147	0.278416	0.278416	0.284943	0.284943	0.278416	0.281679	0.281679	0.284943	0.10586
(-)	CCNB1	CDC20	E2F1	154	0.0959377	1	0.00275957	1.86628	0.678063	0.436936	0.842845	0.80165	0.648801	0.741368	0.725225	0.771509	0.695084	0.733297	0.710155	0.748367	0.506128
(-)	CCNB1	CDK1	E2F1	155.667	0.0953925	1	0.00275957	1.86628	0.679461	0.436936	0.842845	0.801999	0.648801	0.741368	0.7254	0.771684	0.695084	0.733384	0.710242	0.748542	0.506477
(-)	CCNB1	CDK2	E2F4	31.6667	0.00735637	0	0	1.16996	0.0930222	0	0.528376	0.419537	0.396282	0.396282	0.40791	0.40791	0.396282	0.402096	0.402096	0.40791	0.155349
(-)	CCNB1	CDK2	E2F5	29.6667	0.00680465	0	0	1.16996	0.0868203	0	0.528376	0.417987	0.396282	0.396282	0.407134	0.407134	0.396282	0.401708	0.401708	0.407134	0.153799
(-)	CCND1	E2F1	CDKN1A	180.667	0.106194	3	0.00421034	1.0443	0.771633	0.666643	0.471624	0.546626	0.403718	0.520379	0.475172	0.533503	0.462049	0.497776	0.46861	0.504337	0.527475
(-)	CCND1	E2F1	CDKN1B	167	0.100681	2	0.00275957	1.0443	0.722716	0.436936	0.471624	0.534397	0.387052	0.462952	0.460724	0.498675	0.425002	0.461838	0.442863	0.4797	0.441152
(-)	CCND1	E2F1	CDKN2A	168.667	0.109764	3	0.00401158	1.0443	0.760233	0.635172	0.471624	0.543776	0.403718	0.512511	0.473747	0.528144	0.458115	0.493129	0.465931	0.500946	0.516757
(-)	CCND1	E2F1	FOXO3	168	0.101858	2	0.00275957	1.0443	0.729196	0.436936	0.471624	0.536017	0.387052	0.462952	0.461534	0.499485	0.425002	0.462243	0.443268	0.480509	0.442772
(-)	CCND1	E2F1	MYC	192.333	0.114002	2	0.00275957	1.0443	0.825028	0.436936	0.471624	0.559975	0.387052	0.462952	0.473513	0.511464	0.425002	0.468233	0.449258	0.492489	0.46673
(-)	CCND1	E2F1	PCNA	162.667	0.101644	2	0.00275957	1.0443	0.717374	0.436936	0.471624	0.533062	0.387052	0.462952	0.460057	0.498007	0.425002	0.461504	0.442529	0.479032	0.439817
(-)	CCND1	E2F1	hsa-miR-106b-5p	163.667	0.100228	2	0.00275957	1.0443	0.714128	0.436936	0.471624	0.53225	0.387052	0.462952	0.459651	0.497601	0.425002	0.461302	0.442326	0.478626	0.439005
(-)	CCND1	E2F1	hsa-miR-15a-5p	163.667	0.100335	2	0.00275957	1.0443	0.714531	0.436936	0.471624	0.532351	0.387052	0.462952	0.459701	0.497652	0.425002	0.461327	0.442352	0.478676	0.439106
(-)	CCND1	E2F1	hsa-miR-16-5p	166.333	0.100914	2	0.00275957	1.0443	0.722213	0.436936	0.471624	0.534271	0.387052	0.462952	0.460661	0.498612	0.425002	0.461807	0.442832	0.479637	0.441027
(-)	CCND1	E2F1	hsa-miR-17-5p	165	0.10084	2	0.00275957	1.0443	0.719181	0.436936	0.471624	0.533514	0.387052	0.462952	0.460283	0.498233	0.425002	0.461617	0.442642	0.479258	0.440269
(-)	CCND1	E2F1	hsa-miR-195-5p	163	0.100682	2	0.00275957	1.0443	0.714455	0.436936	0.471624	0.532332	0.387052	0.462952	0.459692	0.497642	0.425002	0.461322	0.442347	0.478667	0.439087
(-)	CCND1	E2F1	hsa-miR-19a-3p	161	0.100229	2	0.00275957	1.0443	0.708624	0.436936	0.471624	0.530874	0.387052	0.462952	0.458963	0.496913	0.425002	0.460958	0.441982	0.477938	0.43763
(-)	CCND1	E2F1	hsa-miR-20a-5p	163.667	0.100593	2	0.00275957	1.0443	0.7155	0.436936	0.471624	0.532593	0.387052	0.462952	0.459822	0.497773	0.425002	0.461387	0.442412	0.478797	0.439348
(-)	CCND1	E2F1	hsa-miR-449a	162.333	0.100442	2	0.00275957	1.0443	0.712176	0.436936	0.471624	0.531762	0.387052	0.462952	0.459407	0.497357	0.425002	0.46118	0.442204	0.478382	0.438517
(-)	CCND1	E2F4	MYC	60.3333	0.0212763	1	0	0	0.204467	0	0	0.0511168	0.0166667	0	0.0338917	0.0255584	0.00833333	0.0169459	0.0211125	0.029725	0.0677834
(-)	CCND1	E2F4	PCNA	30.6667	0.00891756	1	0	0	0.0968124	0	0	0.0242031	0.0166667	0	0.0204349	0.0121015	0.00833333	0.0102174	0.0143841	0.0162682	0.0408698
(-)	CCND1	RBL1	E2F1	163.333	0.100818	2	0.00275957	1.0443	0.715655	0.436936	0.471624	0.532632	0.387052	0.462952	0.459842	0.497792	0.425002	0.461397	0.442422	0.478817	0.439387
(-)	CCNE1	CDK2	SKP2	33	0.0106781	0	0.000730613	0.912755	0.108238	0.115681	0.412217	0.336222	0.309163	0.338083	0.322692	0.337153	0.323623	0.330388	0.323158	0.329922	0.159034
(-)	CCNE1	E2F1	CDKN1A	171.667	0.103849	2	0.00421034	1.0443	0.74424	0.666643	0.471624	0.539778	0.387052	0.520379	0.463415	0.530079	0.453715	0.491897	0.458565	0.496747	0.50396
(-)	CCNE1	E2F1	CDKN1B	158	0.098336	1	0.00275957	1.0443	0.695324	0.436936	0.471624	0.527549	0.370385	0.462952	0.448967	0.495251	0.416669	0.45596	0.432818	0.472109	0.417638
(-)	CCNE1	E2F1	hsa-miR-15a-5p	154.667	0.0979898	1	0.00275957	1.0443	0.687138	0.436936	0.471624	0.525503	0.370385	0.462952	0.447944	0.494227	0.416669	0.455448	0.432306	0.471086	0.415591
(-)	CCNE1	E2F1	hsa-miR-15b-5p	151.667	0.0977563	1	0.00275957	1.0443	0.680064	0.436936	0.471624	0.523734	0.370385	0.462952	0.447059	0.493343	0.416669	0.455006	0.431864	0.470201	0.413823
(-)	CCNE1	E2F1	hsa-miR-16-5p	157.333	0.098569	1	0.00275957	1.0443	0.69482	0.436936	0.471624	0.527423	0.370385	0.462952	0.448904	0.495188	0.416669	0.455928	0.432786	0.472046	0.417512
(-)	CCNE1	E2F1	hsa-miR-195-5p	154	0.0983368	1	0.00275957	1.0443	0.687062	0.436936	0.471624	0.525484	0.370385	0.462952	0.447934	0.494218	0.416669	0.455443	0.432301	0.471076	0.415572
(-)	CCNE2	CDK2	SKP2	31.6667	0.0067443	0	0.000730613	1.54959	0.0907262	0.115681	0.699823	0.547549	0.524867	0.553787	0.536208	0.550668	0.539327	0.544998	0.537768	0.543438	0.226558
(-)	CDC20	E2F1	CDC25A	152.667	0.0955921	1	0.00275957	1.0443	0.674012	0.436936	0.471624	0.522221	0.370385	0.462952	0.446303	0.492587	0.416669	0.454628	0.431486	0.469445	0.41231
(-)	CDC20	E2F1	CDK1	151.667	0.0954894	1	0.00275957	1.0443	0.67156	0.436936	0.471624	0.521608	0.370385	0.462952	0.445997	0.49228	0.416669	0.454474	0.431333	0.469138	0.411697
(-)	CDC20	E2F1	TP53	188	0.124871	2	0.00494273	1.0443	0.856846	0.782606	0.471624	0.56793	0.387052	0.54937	0.477491	0.55865	0.468211	0.51343	0.472851	0.51807	0.561102
(+)	CDH1	CTNNB1	SNAI1	32	0.0209225	1	0.00328091	0	0.1446	0.519482	0	0.03615	0.0166667	0.12987	0.0264084	0.0830102	0.0732685	0.0781394	0.0498385	0.0547093	0.182687
(+)	CDH1	CTNNB1	SNAI2	23.6667	0.0125	1	0.00328091	0	0.095788	0.519482	0	0.023947	0.0166667	0.12987	0.0203068	0.0769087	0.0732685	0.0750886	0.0467877	0.0486078	0.170484
(+)	CDH1	CTNNB1	TWIST1	23	0.0238871	1	0.00328091	0	0.137126	0.519482	0	0.0342815	0.0166667	0.12987	0.0254741	0.082076	0.0732685	0.0776723	0.0493713	0.053775	0.180819
(-)	CDH1	EGFR	SRC	23	0.011817	2	0.00155257	0	0.0918485	0.245825	0	0.0229621	0.0333333	0.0614563	0.0281477	0.0422092	0.0473948	0.044802	0.0377713	0.0351785	0.117752
(-)	CDK1	E2F1	E2F2	214.667	0.0981686	1	0.00275957	1.0443	0.811776	0.436936	0.471624	0.556662	0.370385	0.462952	0.463523	0.509807	0.416669	0.463238	0.440096	0.486665	0.446751
(-)	CDK2	E2F1	CDKN1A	177	0.105029	2	0.00421034	1.39228	0.759686	0.666643	0.628779	0.661506	0.504918	0.638245	0.583212	0.649875	0.571581	0.610728	0.577396	0.616543	0.54711
(-)	CDK2	E2F1	CDKN1B	163.333	0.0995159	1	0.00275957	1.39228	0.710769	0.436936	0.628779	0.649277	0.488251	0.580818	0.568764	0.615047	0.534535	0.574791	0.551649	0.591906	0.460788
(-)	CDK2	E2F1	RBL1	159.667	0.0996531	1	0.00275957	1.39228	0.703708	0.436936	0.628779	0.647511	0.488251	0.580818	0.567881	0.614165	0.534535	0.57435	0.551208	0.591023	0.459022
(-)	CDK2	E2F1	UHRF2	158.667	0.0989488	1	0.00275957	1.39228	0.699	0.436936	0.628779	0.646334	0.488251	0.580818	0.567293	0.613576	0.534535	0.574055	0.550914	0.590434	0.457845
(-)	CDK2	EP300	CDKN1A	45.3333	0.0135779	1	0.00145077	0.347981	0.144597	0.229707	0.157155	0.154015	0.134533	0.175293	0.144274	0.164654	0.154913	0.159783	0.149593	0.154464	0.149531
(-)	CDK2	EP300	SKP2	33	0.00856702	0	0.000730613	0.912755	0.100318	0.115681	0.412217	0.334242	0.309163	0.338083	0.321702	0.336163	0.323623	0.329893	0.322663	0.328933	0.157054
(-)	CDK2	RBL1	SKP2	28.6667	0.00718693	0	0.000730613	0.912755	0.0861882	0.115681	0.412217	0.33071	0.309163	0.338083	0.319936	0.334396	0.323623	0.32901	0.32178	0.327166	0.153522
(-)	CDK2	RBL2	SKP2	28	0.00673924	0	0.000730613	0.912755	0.0831315	0.115681	0.412217	0.329946	0.309163	0.338083	0.319554	0.334014	0.323623	0.328819	0.321588	0.326784	0.152757
(-)	CDK2	SKP2	CUL1	29.6667	0.00647135	0	0.000730613	0.912755	0.0855701	0.115681	0.412217	0.330555	0.309163	0.338083	0.319859	0.334319	0.323623	0.328971	0.321741	0.327089	0.153367
(-)	CDK2	SKP2	SKP1	31	0.00661175	0	0.000730613	0.912755	0.0888516	0.115681	0.412217	0.331376	0.309163	0.338083	0.320269	0.334729	0.323623	0.329176	0.321946	0.327499	0.154187
(-)	CDK4	E2F1	CDKN1A	170	0.102866	3	0.00421034	1.0443	0.73711	0.666643	0.471624	0.537996	0.403718	0.520379	0.470857	0.529187	0.462049	0.495618	0.466453	0.500022	0.518844
(-)	CDK4	E2F1	CDKN1B	156.333	0.0973533	2	0.00275957	1.0443	0.688194	0.436936	0.471624	0.525767	0.387052	0.462952	0.456409	0.494359	0.425002	0.459681	0.440705	0.475384	0.432522
(-)	CDK4	E2F1	CDKN2A	158	0.106437	3	0.00401158	1.0443	0.72571	0.635172	0.471624	0.535146	0.403718	0.512511	0.469432	0.523828	0.458115	0.490972	0.463773	0.49663	0.508127
(-)	CDK4	E2F1	CDKN2C	149.667	0.0967798	2	0.00275957	1.49835	0.672269	0.436936	0.676683	0.675579	0.540845	0.616746	0.608212	0.646163	0.578796	0.612479	0.593504	0.627188	0.479805
(-)	CDK4	E2F1	PCNA	152	0.0983157	2	0.00275957	1.0443	0.682851	0.436936	0.471624	0.524431	0.387052	0.462952	0.455741	0.493692	0.425002	0.459347	0.440372	0.474716	0.431186
(-)	CDK4	E2F1	hsa-miR-195-5p	152.333	0.0973541	2	0.00275957	1.0443	0.679932	0.436936	0.471624	0.523701	0.387052	0.462952	0.455376	0.493327	0.425002	0.459164	0.440189	0.474352	0.430457
(-)	CDKN1A	JUN	TP53	70.6667	0.0375322	2	0.00363393	0	0.286796	0.575377	0	0.0716991	0.0333333	0.143844	0.0525162	0.107772	0.0885887	0.0981802	0.0705525	0.0801439	0.248877
(-)	CDKN2A	E2F1	E2F2	218.333	0.107134	2	0.00401158	1.0443	0.852981	0.635172	0.471624	0.566963	0.387052	0.512511	0.477007	0.539737	0.449781	0.494759	0.463394	0.508372	0.523277
(-)	CDKN2A	E2F1	MYC	184.333	0.117112	2	0.00401158	1.0443	0.820164	0.635172	0.471624	0.558759	0.387052	0.512511	0.472905	0.535635	0.449781	0.492708	0.461343	0.50427	0.515073
(-)	CDKN2A	E2F1	SP1	172	0.105817	2	0.00401158	1.0443	0.752313	0.635172	0.471624	0.541797	0.387052	0.512511	0.464424	0.527154	0.449781	0.488468	0.457103	0.495789	0.498111
(-)	CDKN2A	MDM2	E2F1	160.667	0.106395	3	0.00538458	1.0443	0.731065	0.852566	0.471624	0.536484	0.403718	0.56686	0.470101	0.551672	0.485289	0.51848	0.477695	0.510887	0.563814
(-)	CDKN2A	MDM2	TP53	62.6667	0.042927	3	0.00480817	0	0.290504	0.761299	0	0.0726261	0.05	0.190325	0.061313	0.131475	0.120162	0.125819	0.0907377	0.0963942	0.312951
(-)	CEBPA	hsa-miR-223-3p	PARP1	8.66667	0.000843767	0	0	0	0.0210715	0	0	0.00526787	0	0	0.00263393	0.00263393	0	0.00131697	0.00131697	0.00263393	0.00526787
(-)	CHEK1	E2F1	E2F6	151.667	0.095215	1	0.00275957	1.0443	0.670531	0.436936	0.471624	0.521351	0.370385	0.462952	0.445868	0.492152	0.416669	0.45441	0.431268	0.46901	0.411439
(-)	CHEK1	E2F1	EZH2	155.667	0.0959334	1	0.00359903	1.65134	0.68149	0.569852	0.745776	0.729704	0.575998	0.701795	0.652851	0.715749	0.638896	0.677323	0.645874	0.6843	0.515946
(-)	CHEK1	TP53	MDM2	58.6667	0.0339994	2	0.00355616	0	0.24875	0.563064	0	0.0621876	0.0333333	0.140766	0.0477605	0.101477	0.0870497	0.0942632	0.0674051	0.0746186	0.236287
(-)	CHEK1	TRIM28	E2F1	151.333	0.0947027	1	0.00275957	1.0443	0.667921	0.436936	0.471624	0.520698	0.370385	0.462952	0.445542	0.491825	0.416669	0.454247	0.431105	0.468683	0.410787
(-)	CHEK1	TRIM28	E2F2	78.3333	0.00507732	0	0	0	0.180892	0	0	0.0452229	0	0	0.0226115	0.0226115	0	0.0113057	0.0113057	0.0226115	0.0452229
(-)	CHEK1	TRIM28	E2F3	82.6667	0.00858777	0	0	0	0.203013	0	0	0.0507533	0	0	0.0253767	0.0253767	0	0.0126883	0.0126883	0.0253767	0.0507533
(-)	CHEK2	E2F1	E2F6	151.333	0.0950625	1	0.00275957	1.0443	0.66927	0.436936	0.471624	0.521036	0.370385	0.462952	0.44571	0.491994	0.416669	0.454331	0.431189	0.468852	0.411124
(-)	CHEK2	E2F1	EZH2	155.333	0.0957808	1	0.00359903	1.65134	0.680229	0.569852	0.745776	0.729389	0.575998	0.701795	0.652694	0.715592	0.638896	0.677244	0.645795	0.684143	0.515631
(-)	CHEK2	TP53	MDM2	58.3333	0.0338468	2	0.00355616	0	0.247489	0.563064	0	0.0618724	0.0333333	0.140766	0.0476028	0.101319	0.0870497	0.0941844	0.0673262	0.074461	0.235972
(-)	CHEK2	TRIM28	E2F1	151	0.0945502	1	0.00275957	1.0443	0.66666	0.436936	0.471624	0.520383	0.370385	0.462952	0.445384	0.491668	0.416669	0.454168	0.431026	0.468526	0.410472
(-)	CHEK2	TRIM28	E2F2	78	0.00492478	0	0	0	0.179631	0	0	0.0449077	0	0	0.0224539	0.0224539	0	0.0112269	0.0112269	0.0224539	0.0449077
(-)	CHEK2	TRIM28	E2F3	82.3333	0.00843524	0	0	0	0.201752	0	0	0.0504381	0	0	0.025219	0.025219	0	0.0126095	0.0126095	0.025219	0.0504381
(-)	CHUK	NFKB1	NFKBIA	21.6667	0.0110051	0	0.00098125	0	0.0860482	0.155366	0	0.0215121	0	0.0388415	0.010756	0.0301768	0.0194207	0.0247987	0.0150884	0.0204664	0.0603535
(-)	CHUK	NFKB1	hsa-miR-16-5p	26.6667	0.0111051	0	0.00098125	0	0.0967537	0.155366	0	0.0241884	0	0.0388415	0.0120942	0.0315149	0.0194207	0.0254678	0.0157575	0.0218046	0.0630299
(-)	CUL1	SKP2	SKP1	22.3333	0.00122501	0	0.000730613	0.564774	0.0507385	0.115681	0.255062	0.203981	0.191297	0.220217	0.197639	0.212099	0.205757	0.208928	0.201698	0.204869	0.105371
(+)	DDX5	E2F1	NFKB1	159.667	0.104164	1	0.00374082	1.0443	0.720629	0.592302	0.471624	0.533875	0.370385	0.501794	0.45213	0.517835	0.436089	0.476962	0.44411	0.484982	0.462805
(-)	DDX5	TP53	E2F1	187	0.124147	2	0.00494273	1.0443	0.852062	0.782606	0.471624	0.566734	0.387052	0.54937	0.476893	0.558052	0.468211	0.513131	0.472552	0.517472	0.559906
(-)	DNMT1	SIRT1	E2F1	155	0.0962798	1	0.00275957	1.43259	0.681412	0.436936	0.646985	0.655592	0.501906	0.594473	0.578749	0.625033	0.548189	0.586611	0.563469	0.601891	0.458
(-)	DNMT3A	E2F1	EED	148.667	0.0945235	1	0.00275957	1.0443	0.661739	0.436936	0.471624	0.519153	0.370385	0.462952	0.444769	0.491053	0.416669	0.453861	0.430719	0.467911	0.409241
(-)	DNMT3A	E2F1	EZH2	154.333	0.0960655	1	0.00359903	1.65134	0.679231	0.569852	0.745776	0.729139	0.575998	0.701795	0.652569	0.715467	0.638896	0.677182	0.645733	0.684018	0.515381
(-)	E2F1	E2F2	E2F6	213.333	0.0984021	1	0.00275957	1.0443	0.809897	0.436936	0.471624	0.556192	0.370385	0.462952	0.463289	0.509572	0.416669	0.46312	0.439979	0.48643	0.446281
(-)	E2F1	E2F2	HMGA1	212	0.0975457	1	0.00275957	1.50332	0.80393	0.436936	0.678928	0.710178	0.525862	0.61843	0.61802	0.664304	0.572146	0.618225	0.595083	0.641162	0.496615
(-)	E2F1	E2F2	QKI	210.333	0.0974998	1	0.00275957	1.0443	0.800314	0.436936	0.471624	0.553797	0.370385	0.462952	0.462091	0.508374	0.416669	0.462521	0.43938	0.485233	0.443885
(-)	E2F1	E2F2	RBBP4	210.667	0.0979564	1	0.00275957	1.0443	0.802715	0.436936	0.471624	0.554397	0.370385	0.462952	0.462391	0.508675	0.416669	0.462672	0.43953	0.485533	0.444486
(-)	E2F1	E2F6	MAX	149	0.0947913	1	0.00275957	1.0443	0.663432	0.436936	0.471624	0.519576	0.370385	0.462952	0.44498	0.491264	0.416669	0.453966	0.430825	0.468122	0.409665
(-)	E2F1	E2F6	MGA	147	0.0944829	1	0.00275957	1.0443	0.658143	0.436936	0.471624	0.518254	0.370385	0.462952	0.444319	0.490603	0.416669	0.453636	0.430494	0.467461	0.408342
(-)	E2F1	EED	EZH2	153	0.0953061	1	0.00359903	1.65134	0.673627	0.569852	0.745776	0.727739	0.575998	0.701795	0.651868	0.714767	0.638896	0.676832	0.645382	0.683318	0.51398
(-)	E2F1	ERCC1	YWHAQ	147	0.09385	1	0.00275957	1.0443	0.655769	0.436936	0.471624	0.51766	0.370385	0.462952	0.444023	0.490306	0.416669	0.453487	0.430346	0.467164	0.407749
(-)	E2F1	FGFR1	PPP2R1A	152.333	0.0953719	1	0.00275957	1.0443	0.672497	0.436936	0.471624	0.521842	0.370385	0.462952	0.446114	0.492397	0.416669	0.454533	0.431391	0.469255	0.411931
(-)	E2F1	FGFR1	PPP2R1B	151	0.0953656	1	0.00275957	1.0443	0.669719	0.436936	0.471624	0.521148	0.370385	0.462952	0.445766	0.49205	0.416669	0.454359	0.431217	0.468908	0.411236
(-)	E2F1	FGFR1	PPP2R2A	152	0.0955915	1	0.00275957	1.0443	0.672632	0.436936	0.471624	0.521876	0.370385	0.462952	0.44613	0.492414	0.416669	0.454541	0.4314	0.469272	0.411965
(-)	E2F1	FGFR1	PPP2R2B	150	0.0953467	1	0.00275957	1.0443	0.667582	0.436936	0.471624	0.520614	0.370385	0.462952	0.445499	0.491783	0.416669	0.454226	0.431084	0.468641	0.410702
(-)	E2F1	FGFR1	PPP2R2C	150.333	0.0953601	1	0.00275957	1.0443	0.66832	0.436936	0.471624	0.520798	0.370385	0.462952	0.445592	0.491875	0.416669	0.454272	0.43113	0.468733	0.410887
(-)	E2F1	FGFR1	PPP2R2D	151	0.0953638	1	0.00275957	1.0443	0.669712	0.436936	0.471624	0.521146	0.370385	0.462952	0.445765	0.492049	0.416669	0.454359	0.431217	0.468907	0.411235
(-)	E2F1	FGFR1	PPP2R4	149.667	0.0953467	1	0.00275957	1.0443	0.666893	0.436936	0.471624	0.520441	0.370385	0.462952	0.445413	0.491697	0.416669	0.454183	0.431041	0.468555	0.41053
(-)	E2F1	IGF1R	YWHAB	157.333	0.0980866	1	0.00275957	1.0443	0.693011	0.436936	0.471624	0.526971	0.370385	0.462952	0.448678	0.494962	0.416669	0.455815	0.432673	0.47182	0.417059
(-)	E2F1	IGF1R	YWHAG	155	0.0978752	1	0.00275957	1.0443	0.687397	0.436936	0.471624	0.525567	0.370385	0.462952	0.447976	0.49426	0.416669	0.455464	0.432322	0.471118	0.415656
(-)	E2F1	KAT2B	RB1	165	0.0975809	2	0.00275957	1.0443	0.706954	0.436936	0.471624	0.530457	0.387052	0.462952	0.458754	0.496704	0.425002	0.460853	0.441878	0.477729	0.437212
(-)	E2F1	MAP3K5	RB1	166.333	0.0992607	2	0.00275957	1.0443	0.71601	0.436936	0.471624	0.532721	0.387052	0.462952	0.459886	0.497836	0.425002	0.461419	0.442444	0.478861	0.439476
(-)	E2F1	MDM2	MAX	154	0.0970437	2	0.00413258	1.0443	0.682212	0.65433	0.471624	0.524271	0.387052	0.517301	0.455661	0.520786	0.452176	0.486481	0.453919	0.488224	0.485375
(-)	E2F1	MDM2	RB1	170.667	0.100436	3	0.00413258	1.0443	0.729374	0.65433	0.471624	0.536062	0.403718	0.517301	0.46989	0.526681	0.460509	0.493595	0.4652	0.498286	0.513832
(-)	E2F1	MDM4	MDM2	152.333	0.0968817	2	0.00413258	1.72661	0.67816	0.65433	0.779767	0.754365	0.618158	0.748408	0.686262	0.751386	0.683283	0.717335	0.684772	0.718824	0.561398
(-)	E2F1	MXD3	MAX	146	0.0938843	1	0.00275957	1.0443	0.653831	0.436936	0.471624	0.517176	0.370385	0.462952	0.44378	0.490064	0.416669	0.453366	0.430224	0.466922	0.407265
(-)	E2F1	MYC	MAX	177.667	0.107761	1	0.00275957	1.0443	0.771311	0.436936	0.471624	0.546546	0.370385	0.462952	0.458465	0.504749	0.416669	0.460709	0.437567	0.481607	0.436635
(-)	E2F1	MYC	POLR2A	175.667	0.107449	1	0.00275957	1.0443	0.76601	0.436936	0.471624	0.545221	0.370385	0.462952	0.457803	0.504086	0.416669	0.460377	0.437236	0.480945	0.435309
(-)	E2F1	MYC	hsa-miR-106a-5p	177.333	0.107802	1	0.00275957	1.0443	0.770776	0.436936	0.471624	0.546412	0.370385	0.462952	0.458399	0.504682	0.416669	0.460675	0.437534	0.48154	0.436501
(-)	E2F1	MYC	hsa-miR-106b-5p	179.333	0.107575	1	0.00275957	1.0443	0.774059	0.436936	0.471624	0.547233	0.370385	0.462952	0.458809	0.505093	0.416669	0.460881	0.437739	0.481951	0.437321
(-)	E2F1	MYC	hsa-miR-17-5p	180.667	0.108188	1	0.00275957	1.0443	0.779113	0.436936	0.471624	0.548496	0.370385	0.462952	0.459441	0.505724	0.416669	0.461196	0.438055	0.482582	0.438585
(-)	E2F1	MYC	hsa-miR-20a-5p	179.333	0.107941	1	0.00275957	1.0443	0.775431	0.436936	0.471624	0.547576	0.370385	0.462952	0.45898	0.505264	0.416669	0.460966	0.437824	0.482122	0.437664
(-)	E2F1	MYC	hsa-miR-93-5p	177.667	0.109001	1	0.00275957	1.0443	0.775965	0.436936	0.471624	0.547709	0.370385	0.462952	0.459047	0.505331	0.416669	0.461	0.437858	0.482189	0.437798
(+)	E2F1	NFKB1	POLR2A	157.333	0.103645	1	0.00374082	1.0443	0.713862	0.592302	0.471624	0.532184	0.370385	0.501794	0.451284	0.516989	0.436089	0.476539	0.443687	0.484136	0.461114
(+)	E2F1	NFKB1	hsa-miR-17-5p	162.333	0.104384	1	0.00374082	1.0443	0.726965	0.592302	0.471624	0.535459	0.370385	0.501794	0.452922	0.518627	0.436089	0.477358	0.444506	0.485774	0.464389
(-)	E2F1	RARA	FOXA1	143.667	0.0945819	1	0.00275957	1.0443	0.651627	0.436936	0.471624	0.516625	0.370385	0.462952	0.443505	0.489789	0.416669	0.453229	0.430087	0.466647	0.406714
(-)	E2F1	RARA	NCOA3	144	0.0947656	1	0.00275957	1.0443	0.653005	0.436936	0.471624	0.516969	0.370385	0.462952	0.443677	0.489961	0.416669	0.453315	0.430173	0.466819	0.407058
(-)	E2F1	RB1	E2F2	228.333	0.101175	2	0.00275957	1.0443	0.85129	0.436936	0.471624	0.566541	0.387052	0.462952	0.476796	0.514746	0.425002	0.469874	0.450899	0.495771	0.473296
(-)	E2F1	RB1	E2F3	232.667	0.104685	2	0.00275957	1.0443	0.873411	0.436936	0.471624	0.572071	0.387052	0.462952	0.479561	0.517512	0.425002	0.471257	0.452282	0.498536	0.478826
(-)	E2F1	RB1	PRMT2	161.667	0.0972524	2	0.00275957	1.0443	0.698835	0.436936	0.471624	0.528427	0.387052	0.462952	0.457739	0.49569	0.425002	0.460346	0.441371	0.476714	0.435182
(-)	E2F1	RBBP4	HDAC1	150.667	0.0961265	1	0.00275957	1.0443	0.671884	0.436936	0.471624	0.521689	0.370385	0.462952	0.446037	0.492321	0.416669	0.454495	0.431353	0.469179	0.411778
(-)	E2F1	RBL1	MYBL2	150	0.0959592	1	0.00275957	1.0443	0.669879	0.436936	0.471624	0.521188	0.370385	0.462952	0.445786	0.49207	0.416669	0.454369	0.431227	0.468928	0.411277
(-)	E2F1	SIRT1	EP300	158	0.0975865	1	0.00275957	1.0443	0.692512	0.436936	0.471624	0.526846	0.370385	0.462952	0.448616	0.494899	0.416669	0.455784	0.432642	0.471757	0.416935
(-)	E2F1	SIRT1	TP53	191.667	0.125569	2	0.00494273	1.0443	0.86704	0.782606	0.471624	0.570478	0.387052	0.54937	0.478765	0.559924	0.468211	0.514067	0.473488	0.519344	0.563651
(-)	E2F1	SP1	SIRT1	170.333	0.0980957	1	0.00275957	1.0443	0.719905	0.436936	0.471624	0.533694	0.370385	0.462952	0.45204	0.498323	0.416669	0.457496	0.434354	0.475181	0.423783
(-)	E2F1	SP1	hsa-miR-106a-5p	165	0.096507	1	0.00275957	1.0443	0.702926	0.436936	0.471624	0.52945	0.370385	0.462952	0.449917	0.496201	0.416669	0.456435	0.433293	0.473059	0.419538
(-)	E2F1	SUZ12	EZH2	152.333	0.0953378	1	0.00359903	1.65134	0.672369	0.569852	0.745776	0.727424	0.575998	0.701795	0.651711	0.714609	0.638896	0.676753	0.645304	0.68316	0.513666
(-)	E2F1	SUZ12	HDAC3	146.333	0.0939878	1	0.00275957	1.0443	0.654908	0.436936	0.471624	0.517445	0.370385	0.462952	0.443915	0.490199	0.416669	0.453434	0.430292	0.467057	0.407534
(-)	E2F1	TP53	HIC1	186.333	0.124538	2	0.00494273	1.0443	0.852152	0.782606	0.471624	0.566756	0.387052	0.54937	0.476904	0.558063	0.468211	0.513137	0.472557	0.517483	0.559929
(-)	E2F1	TP53	MYBL2	188	0.125322	2	0.00494273	1.0443	0.858537	0.782606	0.471624	0.568352	0.387052	0.54937	0.477702	0.558861	0.468211	0.513536	0.472956	0.518282	0.561525
(-)	E2F1	TP53	RB1	203.333	0.127332	3	0.00494273	1.0443	0.897758	0.782606	0.471624	0.578158	0.403718	0.54937	0.490938	0.563764	0.476544	0.520154	0.483741	0.527351	0.587997
(-)	E2F1	TP53	SFN	188	0.123677	2	0.00494273	1.0443	0.852366	0.782606	0.471624	0.56681	0.387052	0.54937	0.476931	0.55809	0.468211	0.51315	0.472571	0.51751	0.559982
(-)	E2F1	TP53	hsa-miR-205-5p	186	0.124114	2	0.0060376	1.0443	0.849873	0.955962	0.471624	0.566187	0.387052	0.592709	0.476619	0.579448	0.48988	0.534664	0.48325	0.528033	0.602698
(-)	E2F1	TP73	hsa-miR-205-5p	150.333	0.0951574	1	0.00385444	1.0443	0.66756	0.610292	0.471624	0.520608	0.370385	0.506291	0.445497	0.51345	0.438338	0.475894	0.441917	0.479473	0.454036
(-)	E2F1	hsa-let-7a-5p	E2F2	213	0.0987423	1	0.00275957	1.0443	0.810484	0.436936	0.471624	0.556339	0.370385	0.462952	0.463362	0.509646	0.416669	0.463157	0.440015	0.486504	0.446428
(-)	E2F1	hsa-miR-106b-5p	KAT2B	150	0.0940027	1	0.00275957	1.0443	0.66254	0.436936	0.471624	0.519353	0.370385	0.462952	0.444869	0.491153	0.416669	0.453911	0.430769	0.468011	0.409442
(-)	E2F1	hsa-miR-15a-5p	TP53	188.333	0.123861	2	0.00494273	1.0443	0.853747	0.782606	0.471624	0.567155	0.387052	0.54937	0.477103	0.558262	0.468211	0.513236	0.472657	0.517683	0.560328
(-)	E2F1	hsa-miR-16-5p	TP53	191	0.124441	2	0.00494273	1.0443	0.861429	0.782606	0.471624	0.569075	0.387052	0.54937	0.478063	0.559223	0.468211	0.513717	0.473137	0.518643	0.562248
(-)	E2F1	hsa-miR-17-5p	NCOA3	148.667	0.0945663	1	0.00275957	1.0443	0.661899	0.436936	0.471624	0.519193	0.370385	0.462952	0.444789	0.491073	0.416669	0.453871	0.430729	0.467931	0.409282
(-)	E2F1	hsa-miR-18b-5p	MDM2	151.667	0.0968071	2	0.00413258	1.0443	0.676503	0.65433	0.471624	0.522844	0.387052	0.517301	0.454948	0.520072	0.452176	0.486124	0.453562	0.48751	0.483948
(-)	E2F1	hsa-miR-195-5p	E2F3	217	0.101562	1	0.00275957	1.0443	0.829324	0.436936	0.471624	0.561049	0.370385	0.462952	0.465717	0.512001	0.416669	0.464335	0.441193	0.488859	0.451138
(-)	E2F1	hsa-miR-223-3p	PARP1	146	0.0941126	1	0.00275957	1.0443	0.654688	0.436936	0.471624	0.51739	0.370385	0.462952	0.443887	0.490171	0.416669	0.45342	0.430278	0.467029	0.407479
(-)	E2F1	hsa-miR-223-3p	SP3	144.333	0.0940814	1	0.00275957	1.0443	0.651127	0.436936	0.471624	0.5165	0.370385	0.462952	0.443442	0.489726	0.416669	0.453197	0.430055	0.466584	0.406588
(-)	E2F1	hsa-miR-25-3p	KAT2B	147.667	0.0939335	1	0.00344	1.0443	0.657459	0.544672	0.471624	0.518083	0.370385	0.489886	0.444234	0.503985	0.430135	0.46706	0.437185	0.474109	0.435105
(-)	E2F1	hsa-miR-25-3p	MDM2	153.333	0.0967891	2	0.00481301	1.0443	0.679879	0.762066	0.471624	0.523688	0.387052	0.544235	0.45537	0.533961	0.465643	0.499802	0.460506	0.494666	0.511726
(-)	E2F1	hsa-miR-25-3p	TP53	186	0.123685	2	0.00562316	1.0443	0.848263	0.890342	0.471624	0.565784	0.387052	0.576304	0.476418	0.571044	0.481678	0.526361	0.479048	0.523731	0.585891
(-)	E2F1	hsa-miR-449c-5p	MYC	175	0.107449	1	0.00275957	1.0443	0.764632	0.436936	0.471624	0.544876	0.370385	0.462952	0.457631	0.503914	0.416669	0.460291	0.43715	0.480772	0.434965
(-)	E2F1	hsa-miR-93-5p	KAT2B	148.333	0.0954288	1	0.00275957	1.0443	0.664446	0.436936	0.471624	0.51983	0.370385	0.462952	0.445107	0.491391	0.416669	0.45403	0.430888	0.468249	0.409918
(-)	E2F2	E2F6	MAX	76	0.00516586	0	0	0	0.176403	0	0	0.0441007	0	0	0.0220504	0.0220504	0	0.0110252	0.0110252	0.0220504	0.0441007
(-)	E2F2	E2F6	MGA	74	0.00485751	0	0	0	0.171114	0	0	0.0427785	0	0	0.0213893	0.0213893	0	0.0106946	0.0106946	0.0213893	0.0427785
(-)	E2F2	MAP3K5	RB1	93.3333	0.00963524	0	0	0	0.228981	0	0	0.0572453	0	0	0.0286226	0.0286226	0	0.0143113	0.0143113	0.0286226	0.0572453
(-)	E2F2	MXD3	MAX	73	0.0042589	0	0	0	0.166802	0	0	0.0417006	0	0	0.0208503	0.0208503	0	0.0104252	0.0104252	0.0208503	0.0417006
(-)	E2F2	MYC	MAX	104.667	0.0181352	0	0	0	0.284282	0	0	0.0710705	0	0	0.0355353	0.0355353	0	0.0177676	0.0177676	0.0355353	0.0710705
(-)	E2F2	MYC	hsa-let-7a-5p	106	0.0190954	0	0	0	0.290639	0	0	0.0726597	0	0	0.0363298	0.0363298	0	0.0181649	0.0181649	0.0363298	0.0726597
(-)	E2F2	RBBP4	HDAC1	77.6667	0.00650106	0	0	0	0.184855	0	0	0.0462138	0	0	0.0231069	0.0231069	0	0.0115534	0.0115534	0.0231069	0.0462138
(-)	E2F3	E2F6	MAX	80.3333	0.00867631	0	0	0	0.198525	0	0	0.0496311	0	0	0.0248156	0.0248156	0	0.0124078	0.0124078	0.0248156	0.0496311
(-)	E2F3	E2F6	MGA	78.3333	0.00836796	0	0	0	0.193236	0	0	0.0483089	0	0	0.0241544	0.0241544	0	0.0120772	0.0120772	0.0241544	0.0483089
(-)	E2F3	MAP3K5	RB1	97.6667	0.0131457	1	0	0	0.251103	0	0	0.0627757	0.0166667	0	0.0397212	0.0313878	0.00833333	0.0198606	0.0240272	0.0355545	0.0794423
(-)	E2F3	MXD3	MAX	77.3333	0.00776936	0	0	0	0.188924	0	0	0.047231	0	0	0.0236155	0.0236155	0	0.0118077	0.0118077	0.0236155	0.047231
(-)	E2F3	MYC	MAX	109	0.0216457	0	0	0	0.306404	0	0	0.0766009	0	0	0.0383005	0.0383005	0	0.0191502	0.0191502	0.0383005	0.0766009
(-)	E2F3	MYC	hsa-miR-195-5p	110	0.0219146	0	0	0	0.309479	0	0	0.0773697	0	0	0.0386849	0.0386849	0	0.0193424	0.0193424	0.0386849	0.0773697
(-)	E2F3	MYC	hsa-miR-34a-5p	114.667	0.0250172	0	0.000422147	0	0.330759	0.0668404	0	0.0826897	0	0.0167101	0.0413449	0.0496999	0.00835506	0.0290275	0.02485	0.0455224	0.0993998
(-)	E2F3	RBBP4	HDAC1	82	0.0100115	0	0	0	0.206977	0	0	0.0517442	0	0	0.0258721	0.0258721	0	0.012936	0.012936	0.0258721	0.0517442
(-)	FOXO3	TP53	MDM2	62	0.0350203	2	0.00355616	0	0.259467	0.563064	0	0.0648668	0.0333333	0.140766	0.0491	0.102816	0.0870497	0.094933	0.0680748	0.0759582	0.238966
(-)	FOXO3	TP53	hsa-miR-155-5p	56.3333	0.0328036	1	0.00218316	0	0.239444	0.34567	0	0.059861	0.0166667	0.0864175	0.0382638	0.0731392	0.0515421	0.0623406	0.0449029	0.0557015	0.162945
(-)	HIF1A	JMY	TP53	52.3333	0.0321384	1	0.00449993	0	0.228684	0.712494	0	0.0571711	0.0166667	0.178124	0.0369189	0.117647	0.0973951	0.107521	0.067157	0.0772831	0.251961
(-)	MAPK14	TP53	hsa-miR-125b-5p	51.3333	0.0328561	15	0.00218316	0	0.22931	0.34567	0	0.0573275	0.25	0.0864175	0.153664	0.0718725	0.168209	0.120041	0.160936	0.112768	0.393745
(-)	MAPK14	TP53	hsa-miR-200a-3p	48.6667	0.0307518	15	0.00342353	0	0.215907	0.542063	0	0.0539767	0.25	0.135516	0.151988	0.0947463	0.192758	0.143752	0.172373	0.123367	0.439493
(-)	MAPK8	TP53	SIAH1	49.3333	0.0321423	1	0.00218316	0	0.2225	0.34567	0	0.0556251	0.0166667	0.0864175	0.0361459	0.0710213	0.0515421	0.0612817	0.043844	0.0535836	0.158709
(-)	MYC	SP1	hsa-miR-34c-5p	59.3333	0.0167922	0	0	0	0.18558	0	0	0.0463951	0	0	0.0231975	0.0231975	0	0.0115988	0.0115988	0.0231975	0.0463951
(-)	MYC	hsa-miR-22-3p	SP1	56	0.0165321	0	0	0	0.177718	0	0	0.0444294	0	0	0.0222147	0.0222147	0	0.0111074	0.0111074	0.0222147	0.0444294
(-)	MYC	hsa-miR-29b-3p	SP1	60.3333	0.0173272	0	0	0	0.189654	0	0	0.0474134	0	0	0.0237067	0.0237067	0	0.0118533	0.0118533	0.0237067	0.0474134
(-)	MYC	hsa-miR-9-5p	NFKB1	51.3333	0.0240886	0	0.00098125	0	0.196422	0.155366	0	0.0491054	0	0.0388415	0.0245527	0.0439734	0.0194207	0.0316971	0.0219867	0.0342631	0.0879469
(-)	SMAD2	SNAI1	ZEB2	28.6667	0.0120452	0	0.00180033	0	0.104412	0.285055	0	0.0261031	0	0.0712638	0.0130516	0.0486834	0.0356319	0.0421577	0.0243417	0.0308675	0.0973669
(-)	SMAD3	SNAI1	ZEB2	30.3333	0.0124752	0	0.00188748	0	0.109469	0.298854	0	0.0273673	0	0.0747135	0.0136837	0.0510404	0.0373568	0.0441986	0.0255202	0.032362	0.102081
(-)	SMAD3	hsa-miR-200a-3p	ZEB1	21.6667	0.00514946	0	0.00312785	0	0.0640825	0.495248	0	0.0160206	0	0.123812	0.00801031	0.0699163	0.0619059	0.0659111	0.0349581	0.0389633	0.139833
(-)	SMAD3	hsa-miR-200b-3p	ZEB1	24.3333	0.00673399	0	0.00442963	0	0.075536	0.701364	0	0.018884	0	0.175341	0.009442	0.0971125	0.0876705	0.0923915	0.0485562	0.0532772	0.194225
(-)	SMAD4	SNAI1	ZEB2	31	0.0132294	0	0.00178403	0	0.113676	0.282473	0	0.0284189	0	0.0706183	0.0142095	0.0495186	0.0353092	0.0424139	0.0247593	0.031864	0.0990373
0	PPP2CA	PPP2R1A	PPP2R2D	15.3333	0.00066184	0	0	0	0.0341631	0	0	0.00854078	0	0	0.00427039	0.00427039	0	0.0021352	0.0021352	0.00427039	0.00854078
0	PPP2CA	PPP2R2A	PPP2R1B	15	0.000883157	0	0	0	0.0343046	0	0	0.00857616	0	0	0.00428808	0.00428808	0	0.00214404	0.00214404	0.00428808	0.00857616
0	PPP2CA	PPP2R2D	PPP2R1A	15.3333	0.00066184	0	0	0	0.0341631	0	0	0.00854078	0	0	0.00427039	0.00427039	0	0.0021352	0.0021352	0.00427039	0.00854078
(+)	AKT1	CCND1	E2F1	174	0.112339	2	0.0036023	1.0443	0.78091	0.570368	0.471624	0.548946	0.387052	0.49631	0.467999	0.522628	0.441681	0.482154	0.45484	0.495313	0.489059
(+)	AKT1	CDK4	E2F1	163.333	0.109011	2	0.0036023	1.0443	0.746388	0.570368	0.471624	0.540315	0.387052	0.49631	0.463683	0.518313	0.441681	0.479997	0.452682	0.490998	0.480428
(+)	AKT1	CREB1	E2F1	159	0.106352	1	0.0036023	1.0443	0.727458	0.570368	0.471624	0.535583	0.370385	0.49631	0.452984	0.515947	0.433348	0.474647	0.443166	0.484465	0.459029
(+)	AKT1	GSK3B	E2F1	166	0.113764	1	0.00480778	1.0443	0.769728	0.761239	0.471624	0.54615	0.370385	0.544028	0.458267	0.545089	0.457206	0.501148	0.457737	0.501678	0.517314
(+)	AKT1	MDM2	E2F1	166	0.10897	2	0.0049753	1.0443	0.751742	0.787762	0.471624	0.541654	0.387052	0.550659	0.464353	0.546156	0.468855	0.507506	0.466604	0.505254	0.536116
(-)	AKT1	NFKB1	E2F1	171.333	0.115883	1	0.00458355	1.0443	0.788693	0.725734	0.471624	0.550892	0.370385	0.535152	0.460638	0.543022	0.452768	0.497895	0.456703	0.50183	0.51318
(+)	AKT1	RELA	SIRT1	31	0.0151622	0	0.000842723	0	0.120926	0.133432	0	0.0302315	0	0.0333581	0.0151158	0.0317948	0.016679	0.0242369	0.0158974	0.0234553	0.0635896
(+)	APC	CTNNB1	AXIN2	21	0.00856525	0	0.00328091	0	0.0755184	0.519482	0	0.0188796	0	0.12987	0.00943979	0.074375	0.0649352	0.0696551	0.0371875	0.0419074	0.14875
(+)	APC	CTNNB1	GSK3B	26.6667	0.0158399	0	0.0044864	0	0.114515	0.710352	0	0.0286288	0	0.177588	0.0143144	0.103108	0.088794	0.0959512	0.0515542	0.0587114	0.206217
(+)	APC	E2F1	FBXO5	149.333	0.0951045	1	0.00275957	1.0443	0.665296	0.436936	0.471624	0.520042	0.370385	0.462952	0.445213	0.491497	0.416669	0.454083	0.430941	0.468355	0.410131
(+)	APC	E2F1	hsa-miR-106b-5p	152	0.0947373	1	0.00275957	1.0443	0.669428	0.436936	0.471624	0.521075	0.370385	0.462952	0.44573	0.492014	0.416669	0.454341	0.431199	0.468872	0.411164
(+)	APC	E2F2	FBXO5	76.3333	0.00547909	0	0	0	0.178267	0	0	0.0445667	0	0	0.0222833	0.0222833	0	0.0111417	0.0111417	0.0222833	0.0445667
(+)	APC	E2F3	FBXO5	80.6667	0.00898955	0	0	0	0.200388	0	0	0.050097	0	0	0.0250485	0.0250485	0	0.0125243	0.0125243	0.0250485	0.050097
(+)	APC	E2F3	hsa-miR-106b-5p	83.3333	0.00862232	0	0	0	0.20452	0	0	0.0511301	0	0	0.025565	0.025565	0	0.0127825	0.0127825	0.025565	0.0511301
(+)	AR	CCNA2	E2F4	26.3333	0.00275761	0	0	0.635029	0.064752	0	0.286791	0.231281	0.215093	0.215093	0.223187	0.223187	0.215093	0.21914	0.21914	0.223187	0.0878858
(+)	AR	CCNA2	E2F5	24.3333	0.00220588	0	0	0.635029	0.0585502	0	0.286791	0.229731	0.215093	0.215093	0.222412	0.222412	0.215093	0.218753	0.218753	0.222412	0.0863353
(+)	AR	CCND1	E2F1	166.667	0.101025	2	0.00275957	1.0443	0.723318	0.436936	0.471624	0.534548	0.387052	0.462952	0.4608	0.49875	0.425002	0.461876	0.442901	0.479775	0.441303
(+)	AR	CCND1	E2F4	34.6667	0.0082992	1	0	0	0.102757	0	0	0.0256893	0.0166667	0	0.021178	0.0128447	0.00833333	0.010589	0.0147557	0.0170113	0.042356
(+)	AR	CCND1	E2F5	32.6667	0.00774748	1	0	0	0.0965554	0	0	0.0241389	0.0166667	0	0.0204028	0.0120694	0.00833333	0.0102014	0.014368	0.0162361	0.0408055
(+)	AR	MYC	E2F1	182.333	0.108373	1	0.00275957	1.0443	0.78325	0.436936	0.471624	0.549531	0.370385	0.462952	0.459958	0.506241	0.416669	0.461455	0.438313	0.4831	0.439619
(+)	ASH2L	E2F1	TP53	185.333	0.124255	2	0.00494273	1.0443	0.849023	0.782606	0.471624	0.565974	0.387052	0.54937	0.476513	0.557672	0.468211	0.512941	0.472362	0.517092	0.559147
(+)	ASH2L	SIN3A	TP53	49	0.0332957	1	0.00218316	0	0.226138	0.34567	0	0.0565346	0.0166667	0.0864175	0.0366006	0.071476	0.0515421	0.0615091	0.0440713	0.0540383	0.159619
(+)	ATM	CHEK1	E2F1	151	0.0953315	1	0.00275957	1.39972	0.669591	0.436936	0.632139	0.641502	0.490771	0.583338	0.566136	0.61242	0.537054	0.574737	0.551595	0.589278	0.451333
(+)	ATM	CHEK2	E2F1	150.667	0.095179	1	0.00275957	1.39972	0.66833	0.436936	0.632139	0.641186	0.490771	0.583338	0.565979	0.612262	0.537054	0.574658	0.551516	0.58912	0.451018
(+)	ATM	RB1	E2F1	165	0.0983005	2	0.00275957	1.39972	0.709654	0.436936	0.632139	0.651517	0.507437	0.583338	0.579477	0.617428	0.545388	0.581408	0.562433	0.598453	0.478015
(+)	ATR	CHEK1	E2F1	150	0.0943261	1	0.00275957	1.0443	0.663753	0.436936	0.471624	0.519656	0.370385	0.462952	0.445021	0.491304	0.416669	0.453986	0.430845	0.468162	0.409745
(+)	ATR	CHEK2	E2F1	149.667	0.0941735	1	0.00275957	1.0443	0.662492	0.436936	0.471624	0.519341	0.370385	0.462952	0.444863	0.491147	0.416669	0.453908	0.430766	0.468005	0.40943
(+)	ATR	E2F1	E2F2	211.667	0.0975131	1	0.00275957	1.0443	0.803119	0.436936	0.471624	0.554498	0.370385	0.462952	0.462441	0.508725	0.416669	0.462697	0.439555	0.485583	0.444586
(+)	ATR	RB1	E2F1	164	0.0972951	2	0.00275957	1.0443	0.703816	0.436936	0.471624	0.529672	0.387052	0.462952	0.458362	0.496312	0.425002	0.460657	0.441682	0.477337	0.436427
(+)	ATR	RB1	E2F2	91	0.00766967	1	0	0	0.216787	0	0	0.0541967	0.0166667	0	0.0354317	0.0270984	0.00833333	0.0177159	0.0218825	0.031265	0.0708634
(+)	ATR	RB1	E2F3	95.3333	0.0111801	1	0	0	0.238909	0	0	0.0597271	0.0166667	0	0.0381969	0.0298636	0.00833333	0.0190984	0.0232651	0.0340302	0.0763938
(+)	ATR	TP53	E2F1	186.667	0.12367	2	0.00494273	1.0443	0.849587	0.782606	0.471624	0.566115	0.387052	0.54937	0.476583	0.557742	0.468211	0.512976	0.472397	0.517163	0.559288
(-)	AXIN2	CTNNB1	GSK3B	24.6667	0.0154809	0	0.0044864	0	0.109036	0.710352	0	0.027259	0	0.177588	0.0136295	0.102423	0.088794	0.0956088	0.0512117	0.0580265	0.204847
(-)	AXIN2	CTNNB1	TCF4	17.6667	0.00765425	0	0.00422412	0	0.065214	0.668824	0	0.0163035	0	0.167206	0.00815174	0.0917547	0.083603	0.0876789	0.0458774	0.0499532	0.183509
(+)	AXIN2	GSK3B	CTNNB1	24.6667	0.0154809	0	0.0044864	0	0.109036	0.710352	0	0.027259	0	0.177588	0.0136295	0.102423	0.088794	0.0956088	0.0512117	0.0580265	0.204847
(+)	AXIN2	GSK3B	E2F1	155	0.102231	1	0.00396506	1.0443	0.703735	0.627806	0.471624	0.529652	0.370385	0.51067	0.450018	0.520161	0.440527	0.480344	0.445273	0.48509	0.467458
(+)	BCL2	TP53	MYBL2	65.3333	0.0370714	1	0.00218316	0	0.274048	0.34567	0	0.068512	0.0166667	0.0864175	0.0425894	0.0774648	0.0515421	0.0645034	0.0470657	0.0600271	0.171596
(+)	BCL2	TP53	PMAIP1	65	0.0354306	1	0.00218316	0	0.267205	0.34567	0	0.0668011	0.0166667	0.0864175	0.0417339	0.0766093	0.0515421	0.0640757	0.046638	0.0591716	0.169885
(+)	BCL2	TP53	hsa-miR-125b-5p	66.3333	0.0377776	1	0.00218316	0	0.278763	0.34567	0	0.0696909	0.0166667	0.0864175	0.0431788	0.0780542	0.0515421	0.0647981	0.0473604	0.0606165	0.172775
(+)	BCL2	TP53	hsa-miR-192-5p	63.3333	0.0362309	1	0.00218316	0	0.266763	0.34567	0	0.0666908	0.0166667	0.0864175	0.0416787	0.0765541	0.0515421	0.0640481	0.0466104	0.0591164	0.169775
(+)	BCL2	TP53	hsa-miR-200b-3p	66.3333	0.0372578	1	0.00472531	0	0.276814	0.74818	0	0.0692034	0.0166667	0.187045	0.0429351	0.128124	0.101856	0.11499	0.0723954	0.0855296	0.272915
(+)	BCL2	TP53	hsa-miR-200c-3p	65.6667	0.0368293	1	0.00333803	0	0.273829	0.528525	0	0.0684572	0.0166667	0.132131	0.042562	0.100294	0.074399	0.0873466	0.0584805	0.0714281	0.217255
(+)	BCL2	TP53	hsa-miR-34a-5p	69.6667	0.0390603	1	0.00260531	0	0.290462	0.41251	0	0.0726156	0.0166667	0.103128	0.0446411	0.0878716	0.0598971	0.0738844	0.0522691	0.0662564	0.19241
(+)	BCL2	TP53	hsa-miR-34c-5p	65	0.035662	1	0.00218316	0	0.268072	0.34567	0	0.0670181	0.0166667	0.0864175	0.0418424	0.0767178	0.0515421	0.0641299	0.0466922	0.0592801	0.170102
(+)	BIRC2	BIRC3	TRAF1	13.6667	0.00260523	0	0	0	0.0380097	0	0	0.00950241	0	0	0.00475121	0.00475121	0	0.0023756	0.0023756	0.00475121	0.00950241
(-)	BIRC2	E2F1	NFKB1	162.333	0.104392	1	0.00374082	1.0443	0.726996	0.592302	0.471624	0.535467	0.370385	0.501794	0.452926	0.51863	0.436089	0.47736	0.444508	0.485778	0.464397
(+)	BMI1	CDKN2A	E2F1	156.333	0.103562	2	0.00401158	1.0443	0.711485	0.635172	0.471624	0.531589	0.387052	0.512511	0.45932	0.52205	0.449781	0.485916	0.454551	0.490685	0.487904
(+)	BRCA1	E2F1	KPNA2	152.333	0.0952283	1	0.00275957	1.43259	0.671958	0.436936	0.646985	0.653229	0.501906	0.594473	0.577567	0.623851	0.548189	0.58602	0.562878	0.600709	0.455637
(+)	BRCA1	E2F1	RBBP8	150	0.0946762	1	0.00275957	1.43259	0.665066	0.436936	0.646985	0.651506	0.501906	0.594473	0.576706	0.622989	0.548189	0.585589	0.562447	0.599847	0.453914
(+)	BRCA1	E2F1	SP1	170	0.0972593	1	0.00275957	1.43259	0.716078	0.436936	0.646985	0.664259	0.501906	0.594473	0.583082	0.629366	0.548189	0.588778	0.565636	0.606224	0.466667
(+)	BRD7	TP53	E2F1	185.333	0.123656	2	0.00494273	1.0443	0.846777	0.782606	0.471624	0.565412	0.387052	0.54937	0.476232	0.557391	0.468211	0.512801	0.472221	0.516812	0.558585
(+)	CASP3	CCNE1	E2F1	155.333	0.10055	1	0.00417806	1.0443	0.69812	0.661532	0.471624	0.528248	0.370385	0.519101	0.449316	0.523675	0.444743	0.484209	0.44703	0.486496	0.474486
(+)	CCNA2	CDK2	CDKN1B	32.3333	0.0069799	0	0	0.983011	0.0929874	0	0.443946	0.356206	0.332959	0.332959	0.344583	0.344583	0.332959	0.338771	0.338771	0.344583	0.134233
(+)	CCNA2	CDK2	E2F1	164.667	0.099948	1	0.00275957	2.02731	0.715145	0.436936	0.91557	0.865464	0.703344	0.795911	0.784404	0.830688	0.749628	0.790158	0.767016	0.807546	0.533579
(+)	CCNA2	E2F1	CDKN1B	158.667	0.0951396	1	0.00275957	1.67933	0.684711	0.436936	0.758415	0.739989	0.585478	0.678045	0.662734	0.709017	0.631762	0.67039	0.647248	0.685875	0.486682
(+)	CCNA2	E2F4	SKP2	28	0.00291539	0	0.000730613	1.1998	0.0687874	0.115681	0.541853	0.423587	0.40639	0.43531	0.414988	0.429449	0.42085	0.425149	0.417919	0.422218	0.181581
(+)	CCNA2	E2F5	SKP2	26	0.00236366	0	0.000730613	1.1998	0.0625856	0.115681	0.541853	0.422036	0.40639	0.43531	0.414213	0.428673	0.42085	0.424762	0.417532	0.421443	0.18003
(+)	CCNA2	RB1	CDKN1B	38	0.0052962	1	0	0.635029	0.0983795	0	0.286791	0.239688	0.23176	0.215093	0.235724	0.227391	0.223427	0.225409	0.229575	0.231557	0.112959
(+)	CCNA2	RB1	E2F1	170.333	0.0982643	2	0.00275957	1.67933	0.720537	0.436936	0.758415	0.748946	0.602145	0.678045	0.675545	0.713496	0.640095	0.676795	0.65782	0.69452	0.512305
(+)	CCNA2	RB1	E2F2	97.3333	0.00863884	1	0	0.635029	0.233508	0	0.286791	0.27347	0.23176	0.215093	0.252615	0.244282	0.223427	0.233854	0.238021	0.248448	0.146741
(+)	CCNA2	RB1	E2F3	101.667	0.0121493	1	0	0.635029	0.255629	0	0.286791	0.279001	0.23176	0.215093	0.25538	0.247047	0.223427	0.235237	0.239403	0.251214	0.152272
(+)	CCNA2	RBL1	SKP2	24	0.00281063	0	0.000730613	1.1998	0.06013	0.115681	0.541853	0.421422	0.40639	0.43531	0.413906	0.428366	0.42085	0.424608	0.417378	0.421136	0.179416
(+)	CCNA2	RBL2	SKP2	23.3333	0.00236294	0	0.000730613	1.1998	0.0570732	0.115681	0.541853	0.420658	0.40639	0.43531	0.413524	0.427984	0.42085	0.424417	0.417187	0.420754	0.178652
(+)	CCNB1	CDK2	CDK1	29.3333	0.00723276	0	0	1.16996	0.0877375	0	0.528376	0.418216	0.396282	0.396282	0.407249	0.407249	0.396282	0.401765	0.401765	0.407249	0.154028
(+)	CCNB1	CDK2	E2F1	163.667	0.100083	1	0.00275957	2.21426	0.713583	0.436936	1	0.928396	0.766667	0.859234	0.847531	0.893815	0.81295	0.853383	0.830241	0.870673	0.554297
(+)	CCNB2	CDK2	E2F1	156.667	0.0989415	1	0.00275957	1.39228	0.69484	0.436936	0.628779	0.645294	0.488251	0.580818	0.566773	0.613056	0.534535	0.573795	0.550654	0.589914	0.456806
(+)	CCND1	CDK2	CDKN1B	40.6667	0.0125215	1	0	0.347981	0.130993	0	0.157155	0.150614	0.134533	0.117866	0.142573	0.13424	0.126199	0.13022	0.134386	0.138407	0.0887035
(+)	CCND1	CDK2	E2F1	173	0.10549	2	0.00275957	1.39228	0.75315	0.436936	0.628779	0.659872	0.504918	0.580818	0.582395	0.620345	0.542868	0.581606	0.562631	0.60137	0.48805
(+)	CCND1	E2F1	CDC25A	166	0.100902	2	0.00275957	1.0443	0.721479	0.436936	0.471624	0.534088	0.387052	0.462952	0.46057	0.49852	0.425002	0.461761	0.442786	0.479545	0.440843
(+)	CCND1	E2F1	E2F2	226.333	0.104024	2	0.00275957	1.0443	0.857845	0.436936	0.471624	0.568179	0.387052	0.462952	0.477615	0.515566	0.425002	0.470284	0.451309	0.496591	0.474935
(+)	CCND1	E2F1	MDM2	168.667	0.103285	3	0.00413258	1.0443	0.735929	0.65433	0.471624	0.5377	0.403718	0.517301	0.470709	0.527501	0.460509	0.494005	0.465609	0.499105	0.515471
(+)	CCND1	E2F1	SP1	180	0.102708	2	0.00275957	1.0443	0.757177	0.436936	0.471624	0.543013	0.387052	0.462952	0.465032	0.502982	0.425002	0.463992	0.445017	0.484007	0.449768
(+)	CCND1	RB1	CDKN1B	46.3333	0.0108378	2	0	0	0.136385	0	0	0.0340962	0.0333333	0	0.0337148	0.0170481	0.0166667	0.0168574	0.0251907	0.0253814	0.0674295
(+)	CCND1	RB1	E2F1	178.667	0.103806	3	0.00275957	1.0443	0.758542	0.436936	0.471624	0.543354	0.403718	0.462952	0.473536	0.503153	0.433335	0.468244	0.453436	0.488344	0.466776
(+)	CCND1	RB1	E2F2	105.667	0.0141804	2	0	0	0.271513	0	0	0.0678783	0.0333333	0	0.0506058	0.0339391	0.0166667	0.0253029	0.0336362	0.0422725	0.101212
(+)	CCND1	RB1	E2F3	110	0.0176909	2	0	0	0.293635	0	0	0.0734087	0.0333333	0	0.053371	0.0367043	0.0166667	0.0266855	0.0350188	0.0450377	0.106742
(+)	CCND3	CDK4	E2F1	151.333	0.0967812	2	0.00275957	1.0443	0.675717	0.436936	0.471624	0.522647	0.387052	0.462952	0.45485	0.4928	0.425002	0.458901	0.439926	0.473825	0.429403
(+)	CCNE1	CDK2	CDKN1B	31.6667	0.0101763	0	0	0.347981	0.1036	0	0.157155	0.143766	0.117866	0.117866	0.130816	0.130816	0.117866	0.124341	0.124341	0.130816	0.0651887
(+)	CCNE1	CDK2	E2F1	164	0.103144	1	0.00275957	1.39228	0.725757	0.436936	0.628779	0.653024	0.488251	0.580818	0.570637	0.616921	0.534535	0.575728	0.552586	0.593779	0.464535
(+)	CCNE1	E2F1	E2F2	217.333	0.101679	1	0.00275957	1.0443	0.830452	0.436936	0.471624	0.561331	0.370385	0.462952	0.465858	0.512142	0.416669	0.464405	0.441263	0.489	0.45142
(+)	CCNE1	RB1	CDKN1B	37.3333	0.00849256	1	0	0	0.108992	0	0	0.0272481	0.0166667	0	0.0219574	0.013624	0.00833333	0.0109787	0.0151453	0.0177907	0.0439147
(+)	CCNE1	RB1	E2F1	169.667	0.101461	2	0.00275957	1.0443	0.73115	0.436936	0.471624	0.536506	0.387052	0.462952	0.461779	0.499729	0.425002	0.462365	0.44339	0.480754	0.443261
(+)	CCNE1	RB1	E2F2	96.6667	0.0118352	1	0	0	0.244121	0	0	0.0610302	0.0166667	0	0.0388484	0.0305151	0.00833333	0.0194242	0.0235909	0.0346817	0.0776968
(+)	CCNE1	RB1	E2F3	101	0.0153456	1	0	0	0.266242	0	0	0.0665605	0.0166667	0	0.0416136	0.0332803	0.00833333	0.0208068	0.0249735	0.0374469	0.0832272
(+)	CCNE2	CDK2	E2F1	162.667	0.0992105	1	0.00275957	2.02911	0.708246	0.436936	0.916385	0.86435	0.703955	0.796523	0.784153	0.830436	0.750239	0.790338	0.767196	0.807295	0.532058
(+)	CDC20	E2F1	FBXO5	147.667	0.0952848	1	0.00275957	1.0443	0.662528	0.436936	0.471624	0.51935	0.370385	0.462952	0.444868	0.491151	0.416669	0.45391	0.430768	0.468009	0.409439
(+)	CDC25A	CDK2	E2F1	162.333	0.0997369	1	0.00275957	1.39228	0.709532	0.436936	0.628779	0.648967	0.488251	0.580818	0.568609	0.614893	0.534535	0.574714	0.551572	0.591751	0.460478
(+)	CDC25A	CDK4	E2F1	155.333	0.0975742	2	0.00275957	1.0443	0.686957	0.436936	0.471624	0.525457	0.387052	0.462952	0.456254	0.494205	0.425002	0.459603	0.440628	0.47523	0.432213
(+)	CDC6	CDK2	CDT1	26.6667	0.00831818	0	0	0.347981	0.0862995	0	0.157155	0.139441	0.117866	0.117866	0.128653	0.128653	0.117866	0.12326	0.12326	0.128653	0.0608636
(+)	CDC6	CDK2	E2F1	163.667	0.101656	1	0.00275957	1.39228	0.719486	0.436936	0.628779	0.651456	0.488251	0.580818	0.569853	0.616137	0.534535	0.575336	0.552194	0.592995	0.462967
(+)	CDC6	CDK2	E2F4	31.6667	0.00892986	0	0	0.347981	0.0989247	0	0.157155	0.142597	0.117866	0.117866	0.130232	0.130232	0.117866	0.124049	0.124049	0.130232	0.0640198
(+)	CDK1	RB1	E2F1	167	0.0979505	2	0.00275957	1.0443	0.712473	0.436936	0.471624	0.531836	0.387052	0.462952	0.459444	0.497394	0.425002	0.461198	0.442223	0.478419	0.438592
(+)	CDK1	RB1	E2F2	94	0.00832512	1	0	0	0.225444	0	0	0.056361	0.0166667	0	0.0365138	0.0281805	0.00833333	0.0182569	0.0224236	0.0323472	0.0730277
(+)	CDK1	RB1	E2F3	98.3333	0.0118356	1	0	0	0.247566	0	0	0.0618914	0.0166667	0	0.039279	0.0309457	0.00833333	0.0196395	0.0238062	0.0351124	0.0785581
(+)	CDK2	CDKN1B	CDK4	30	0.00919353	1	0	0.347981	0.0964702	0	0.157155	0.141984	0.134533	0.117866	0.138258	0.129925	0.126199	0.128062	0.132229	0.134091	0.0800729
(+)	CDK2	E2F4	SKP2	32.6667	0.00729169	0	0.000730613	0.912755	0.0948457	0.115681	0.412217	0.332874	0.309163	0.338083	0.321018	0.335479	0.323623	0.329551	0.322321	0.328248	0.155686
(+)	CDK2	E2F5	SKP2	30.6667	0.00673996	0	0.000730613	0.912755	0.0886438	0.115681	0.412217	0.331324	0.309163	0.338083	0.320243	0.334703	0.323623	0.329163	0.321933	0.327473	0.154136
(+)	CDK2	RB1	CDKN1B	42.6667	0.0096725	1	0	0.347981	0.124438	0	0.157155	0.148975	0.134533	0.117866	0.141754	0.133421	0.126199	0.12981	0.133977	0.137587	0.0870648
(+)	CDK2	SKP2	CDKN1A	46	0.0125626	1	0.00218138	0.912755	0.142166	0.345388	0.412217	0.344704	0.325829	0.39551	0.335267	0.370107	0.36067	0.365388	0.347968	0.352687	0.241609
(+)	CDK2	SKP2	CDKN1B	32.3333	0.00704977	0	0.000730613	0.912755	0.0932495	0.115681	0.412217	0.332475	0.309163	0.338083	0.320819	0.335279	0.323623	0.329451	0.322221	0.328049	0.155287
(+)	CDK4	E2F1	MYC	181.667	0.110674	2	0.00275957	1.0443	0.790506	0.436936	0.471624	0.551345	0.387052	0.462952	0.469198	0.507148	0.425002	0.466075	0.4471	0.488173	0.4581
(+)	CDK4	RB1	CDKN1B	35.6667	0.00750983	2	0	0	0.101862	0	0	0.0254656	0.0333333	0	0.0293995	0.0127328	0.0166667	0.0146997	0.0230331	0.0210661	0.0587989
(+)	CDKN1A	JUN	TP53	70.6667	0.0375322	2	0.00363393	0	0.286796	0.575377	0	0.0716991	0.0333333	0.143844	0.0525162	0.107772	0.0885887	0.0981802	0.0705525	0.0801439	0.248877
(+)	CDKN2A	E2F1	SIVA1	152.333	0.103213	2	0.00401158	1.0443	0.70191	0.635172	0.471624	0.529196	0.387052	0.512511	0.458124	0.520853	0.449781	0.485317	0.453952	0.489489	0.48551
(+)	CDKN2A	E2F1	TP53	193.333	0.133291	3	0.00619474	1.0443	0.899449	0.980841	0.471624	0.57858	0.403718	0.598929	0.491149	0.588754	0.501323	0.545039	0.496236	0.539952	0.637979
(+)	CDKN2A	E2F1	ZEB1	160	0.106488	2	0.00401158	1.0443	0.730037	0.635172	0.471624	0.536227	0.387052	0.512511	0.461639	0.524369	0.449781	0.487075	0.45571	0.493004	0.492541
(+)	CDKN2A	HNRNPD	E2F1	152	0.103478	2	0.00401158	1.0443	0.702215	0.635172	0.471624	0.529272	0.387052	0.512511	0.458162	0.520891	0.449781	0.485336	0.453972	0.489527	0.485586
(+)	CDKN2A	MDM2	MYC	53.6667	0.0267482	2	0.00262501	0	0.211219	0.41563	0	0.0528048	0.0333333	0.103907	0.0430691	0.0783561	0.0686204	0.0734882	0.0558447	0.0607126	0.190046
(+)	CENPA	NPM1	E2F1	145.333	0.094035	1	0.00275957	1.65647	0.653019	0.436936	0.74809	0.724322	0.577734	0.670302	0.651028	0.697312	0.624018	0.660665	0.637523	0.67417	0.476178
(+)	CHEK1	E2F1	E2F2	214.333	0.0982058	1	0.00275957	1.0443	0.811227	0.436936	0.471624	0.556525	0.370385	0.462952	0.463455	0.509739	0.416669	0.463204	0.440062	0.486597	0.446613
(+)	CHEK1	E2F1	MDM2	156.667	0.0974674	2	0.00413258	1.0443	0.689311	0.65433	0.471624	0.526046	0.387052	0.517301	0.456549	0.521673	0.452176	0.486925	0.454362	0.489111	0.48715
(+)	CHEK1	RB1	E2F1	166.667	0.0979878	2	0.00275957	1.0443	0.711924	0.436936	0.471624	0.531699	0.387052	0.462952	0.459375	0.497326	0.425002	0.461164	0.442189	0.478351	0.438454
(+)	CHEK1	RB1	E2F2	93.6667	0.0083624	1	0	0	0.224895	0	0	0.0562238	0.0166667	0	0.0364452	0.0281119	0.00833333	0.0182226	0.0223893	0.0322786	0.0728905
(+)	CHEK1	RB1	E2F3	98	0.0118728	1	0	0	0.247017	0	0	0.0617542	0.0166667	0	0.0392104	0.0308771	0.00833333	0.0196052	0.0237719	0.0350438	0.0784208
(+)	CHEK1	TP53	E2F1	189.333	0.124363	2	0.00494273	1.0443	0.857695	0.782606	0.471624	0.568142	0.387052	0.54937	0.477597	0.558756	0.468211	0.513483	0.472904	0.518176	0.561315
(+)	CHEK2	E2F1	E2F2	214	0.0980533	1	0.00275957	1.0443	0.809966	0.436936	0.471624	0.55621	0.370385	0.462952	0.463297	0.509581	0.416669	0.463125	0.439983	0.486439	0.446298
(+)	CHEK2	E2F1	MDM2	156.333	0.0973149	2	0.00413258	1.0443	0.68805	0.65433	0.471624	0.525731	0.387052	0.517301	0.456391	0.521516	0.452176	0.486846	0.454284	0.488953	0.486834
(+)	CHEK2	RB1	E2F1	166.333	0.0978353	2	0.00275957	1.0443	0.710663	0.436936	0.471624	0.531384	0.387052	0.462952	0.459218	0.497168	0.425002	0.461085	0.44211	0.478193	0.438139
(+)	CHEK2	RB1	E2F2	93.3333	0.00820986	1	0	0	0.223634	0	0	0.0559086	0.0166667	0	0.0362876	0.0279543	0.00833333	0.0181438	0.0223105	0.0321209	0.0725752
(+)	CHEK2	RB1	E2F3	97.6667	0.0117203	1	0	0	0.245756	0	0	0.0614389	0.0166667	0	0.0390528	0.0307195	0.00833333	0.0195264	0.0236931	0.0348861	0.0781056
(+)	CHEK2	TP53	E2F1	189	0.124211	2	0.00494273	1.0443	0.856434	0.782606	0.471624	0.567827	0.387052	0.54937	0.477439	0.558598	0.468211	0.513404	0.472825	0.518019	0.560999
(+)	CREBBP	E2F1	KAT2B	148.333	0.0942645	1	0.00275957	1.0443	0.660078	0.436936	0.471624	0.518738	0.370385	0.462952	0.444561	0.490845	0.416669	0.453757	0.430615	0.467703	0.408826
(+)	CSNK1A1	TP53	hsa-miR-155-5p	48.3333	0.031134	1	0.00218316	0	0.216652	0.34567	0	0.054163	0.0166667	0.0864175	0.0354148	0.0702902	0.0515421	0.0609161	0.0434784	0.0528525	0.157247
(+)	DDX5	YWHAQ	E2F1	149	0.094284	1	0.00275957	1.0443	0.661529	0.436936	0.471624	0.5191	0.370385	0.462952	0.444743	0.491026	0.416669	0.453847	0.430706	0.467884	0.409189
(+)	DNMT1	EED	EZH2	18.3333	0.00254851	0	0.00083946	0.995337	0.0474387	0.132916	0.449512	0.348994	0.337134	0.370363	0.343064	0.359679	0.353749	0.356714	0.348406	0.351371	0.157467
(+)	E2F1	E2F2	KPNA2	212	0.0980456	1	0.00275957	1.0443	0.805805	0.436936	0.471624	0.555169	0.370385	0.462952	0.462777	0.509061	0.416669	0.462865	0.439723	0.485919	0.445258
(+)	E2F1	E2F2	MAP3K5	214	0.0994787	1	0.00275957	1.0443	0.815313	0.436936	0.471624	0.557546	0.370385	0.462952	0.463966	0.510249	0.416669	0.463459	0.440317	0.487107	0.447635
(+)	E2F1	E2F2	MYC	242	0.111371	1	0.00275957	1.0443	0.917776	0.436936	0.471624	0.583162	0.370385	0.462952	0.476774	0.523057	0.416669	0.469863	0.446721	0.499915	0.473251
(+)	E2F1	E2F6	MYC	179.333	0.108381	1	0.00275957	1.0443	0.77708	0.436936	0.471624	0.547988	0.370385	0.462952	0.459187	0.50547	0.416669	0.461069	0.437928	0.482328	0.438077
(+)	E2F1	E2F7	MYC	176	0.107449	1	0.00275957	1.0443	0.766699	0.436936	0.471624	0.545393	0.370385	0.462952	0.457889	0.504173	0.416669	0.460421	0.437279	0.481031	0.435482
(+)	E2F1	ELF4	MDM2	154.667	0.0967553	2	0.00413258	1.0443	0.682507	0.65433	0.471624	0.524345	0.387052	0.517301	0.455698	0.520823	0.452176	0.486499	0.453937	0.488261	0.485449
(+)	E2F1	EZH2	SIRT1	158	0.0971395	1	0.00359903	1.65134	0.690835	0.569852	0.745776	0.732041	0.575998	0.701795	0.654019	0.716918	0.638896	0.677907	0.646458	0.685469	0.518282
(+)	E2F1	FBXO5	FZR1	145.667	0.0941273	1	0.00275957	1.0443	0.654054	0.436936	0.471624	0.517232	0.370385	0.462952	0.443808	0.490092	0.416669	0.45338	0.430238	0.46695	0.40732
(+)	E2F1	FN1	FLT4	149.667	0.0972126	1	0.0032456	1.0443	0.673892	0.513891	0.471624	0.522191	0.370385	0.482191	0.446288	0.502191	0.426288	0.46424	0.436288	0.47424	0.431519
(+)	E2F1	FN1	KPNA2	148.333	0.0953031	1	0.0032456	1.0443	0.663974	0.513891	0.471624	0.519712	0.370385	0.482191	0.445048	0.500951	0.426288	0.46362	0.435668	0.473	0.429039
(+)	E2F1	FOXO3	TP53	192.667	0.125384	2	0.00494273	1.0443	0.868412	0.782606	0.471624	0.570821	0.387052	0.54937	0.478936	0.560095	0.468211	0.514153	0.473573	0.519516	0.563994
(+)	E2F1	HIC1	SIRT1	152	0.0963996	1	0.00275957	1.0443	0.675663	0.436936	0.471624	0.522634	0.370385	0.462952	0.446509	0.492793	0.416669	0.454731	0.431589	0.469651	0.412723
(+)	E2F1	JMY	TP53	185.333	0.123731	2	0.00494273	1.0443	0.847061	0.782606	0.471624	0.565483	0.387052	0.54937	0.476267	0.557427	0.468211	0.512819	0.472239	0.516847	0.558656
(+)	E2F1	KAT2B	EP300	154	0.0959735	1	0.00275957	1.0443	0.678197	0.436936	0.471624	0.523268	0.370385	0.462952	0.446826	0.49311	0.416669	0.454889	0.431747	0.469968	0.413356
(+)	E2F1	KAT2B	TP53	187.667	0.123956	2	0.00494273	1.0443	0.852725	0.782606	0.471624	0.566899	0.387052	0.54937	0.476975	0.558135	0.468211	0.513173	0.472593	0.517555	0.560072
(+)	E2F1	KDR	FLT4	150.333	0.0981821	1	0.00275957	1.0443	0.678906	0.436936	0.471624	0.523445	0.370385	0.462952	0.446915	0.493198	0.416669	0.454934	0.431792	0.470057	0.413533
(+)	E2F1	KIAA1524	MYC	178	0.108183	1	0.00275957	1.83045	0.773583	0.436936	0.826665	0.813394	0.636665	0.729233	0.72503	0.771313	0.682949	0.727131	0.703989	0.748172	0.525963
(+)	E2F1	KIAA1524	PPP2R1A	150.667	0.0946019	1	0.00275957	1.83045	0.666165	0.436936	0.826665	0.78654	0.636665	0.729233	0.711602	0.757886	0.682949	0.720417	0.697276	0.734744	0.499108
(+)	E2F1	KIAA1524	PPP2R1B	149.333	0.0945955	1	0.00275957	1.83045	0.663386	0.436936	0.826665	0.785845	0.636665	0.729233	0.711255	0.757539	0.682949	0.720244	0.697102	0.734397	0.498413
(+)	E2F1	KIAA1524	PPP2R2A	150.333	0.0948214	1	0.00275957	1.83045	0.6663	0.436936	0.826665	0.786573	0.636665	0.729233	0.711619	0.757903	0.682949	0.720426	0.697284	0.734761	0.499142
(+)	E2F1	KIAA1524	PPP2R2B	148.333	0.0945766	1	0.00275957	1.83045	0.661249	0.436936	0.826665	0.785311	0.636665	0.729233	0.710988	0.757272	0.682949	0.72011	0.696968	0.73413	0.497879
(+)	E2F1	KIAA1524	PPP2R2C	148.667	0.09459	1	0.00275957	1.83045	0.661988	0.436936	0.826665	0.785495	0.636665	0.729233	0.71108	0.757364	0.682949	0.720156	0.697015	0.734222	0.498064
(+)	E2F1	KIAA1524	PPP2R2D	149.333	0.0945937	1	0.00275957	1.83045	0.663379	0.436936	0.826665	0.785843	0.636665	0.729233	0.711254	0.757538	0.682949	0.720243	0.697102	0.734396	0.498412
(+)	E2F1	KIAA1524	PPP2R4	148	0.0945766	1	0.00275957	1.83045	0.660561	0.436936	0.826665	0.785139	0.636665	0.729233	0.710902	0.757186	0.682949	0.720067	0.696925	0.734044	0.497707
(+)	E2F1	KPNA2	E2F2	212	0.0980456	1	0.00275957	1.0443	0.805805	0.436936	0.471624	0.555169	0.370385	0.462952	0.462777	0.509061	0.416669	0.462865	0.439723	0.485919	0.445258
(+)	E2F1	KPNA2	E2F3	216.333	0.101556	1	0.00275957	1.0443	0.827926	0.436936	0.471624	0.5607	0.370385	0.462952	0.465542	0.511826	0.416669	0.464247	0.441105	0.488684	0.450788
(+)	E2F1	KPNA2	MYC	178	0.108024	1	0.00275957	1.0443	0.772988	0.436936	0.471624	0.546965	0.370385	0.462952	0.458675	0.504959	0.416669	0.460814	0.437672	0.481817	0.437054
(+)	E2F1	MDM2	MYC	184.333	0.110633	2	0.00413258	1.0443	0.79586	0.65433	0.471624	0.552683	0.387052	0.517301	0.469867	0.534992	0.452176	0.493584	0.461022	0.50243	0.513787
(+)	E2F1	MDM2	TP53	193.333	0.126812	3	0.00631574	1.0443	0.875145	1	0.471624	0.572504	0.403718	0.603718	0.488111	0.588111	0.503718	0.545915	0.495915	0.538111	0.636692
(+)	E2F1	MDM4	TP53	185	0.123777	2	0.00494273	1.72661	0.846545	0.782606	0.779767	0.796461	0.618158	0.780476	0.70731	0.788469	0.699317	0.743893	0.703314	0.747889	0.635563
(+)	E2F1	MYC	KPNA2	178	0.108024	1	0.00275957	1.0443	0.772988	0.436936	0.471624	0.546965	0.370385	0.462952	0.458675	0.504959	0.416669	0.460814	0.437672	0.481817	0.437054
(+)	E2F1	MYC	SP1	195.667	0.110055	1	0.00275957	1.0443	0.817109	0.436936	0.471624	0.557995	0.370385	0.462952	0.46419	0.510474	0.416669	0.463571	0.440429	0.487332	0.448084
(-)	E2F1	NFKB1	MYC	189.667	0.117546	1	0.00374082	1.0443	0.832811	0.592302	0.471624	0.561921	0.370385	0.501794	0.466153	0.531857	0.436089	0.483973	0.451121	0.499005	0.490851
(+)	E2F1	PPP1R13B	PPP1CA	147.333	0.0939054	1	0.00275957	1.0443	0.656665	0.436936	0.471624	0.517884	0.370385	0.462952	0.444135	0.490418	0.416669	0.453543	0.430402	0.467276	0.407973
(+)	E2F1	PPP1R13B	PPP1CC	146.667	0.0938589	1	0.00275957	1.0443	0.655113	0.436936	0.471624	0.517497	0.370385	0.462952	0.443941	0.490224	0.416669	0.453446	0.430305	0.467083	0.407585
(+)	E2F1	PPP1R13B	TP53	186.333	0.123841	2	0.00494273	1.0443	0.849537	0.782606	0.471624	0.566103	0.387052	0.54937	0.476577	0.557736	0.468211	0.512973	0.472394	0.517157	0.559275
(+)	E2F1	PRKAA2	E2F2	209.667	0.097494	1	0.00275957	1.0443	0.798914	0.436936	0.471624	0.553447	0.370385	0.462952	0.461916	0.5082	0.416669	0.462434	0.439292	0.485058	0.443535
(+)	E2F1	PRKAA2	E2F3	214	0.101004	1	0.00275957	1.0443	0.821036	0.436936	0.471624	0.558977	0.370385	0.462952	0.464681	0.510965	0.416669	0.463817	0.440675	0.487823	0.449066
(+)	E2F1	PTPN1	GSK3B	153.333	0.101951	1	0.00396506	1.0443	0.699243	0.627806	0.471624	0.528529	0.370385	0.51067	0.449457	0.519599	0.440527	0.480063	0.444992	0.484528	0.466335
(+)	E2F1	RB1	HDAC1	168.333	0.099345	2	0.00275957	1.0443	0.720459	0.436936	0.471624	0.533833	0.387052	0.462952	0.460442	0.498393	0.425002	0.461697	0.442722	0.479417	0.440588
(+)	E2F1	RB1	NCOA6	162.333	0.0972857	2	0.00275957	1.0443	0.700337	0.436936	0.471624	0.528802	0.387052	0.462952	0.457927	0.495877	0.425002	0.46044	0.441464	0.476902	0.435558
(+)	E2F1	RBL1	SKP2	155	0.0953467	1	0.00349019	1.60907	0.677912	0.552617	0.726686	0.714493	0.561682	0.683169	0.638087	0.698831	0.622425	0.660628	0.630256	0.668459	0.505971
(+)	E2F1	SIAH1	XIAP	149.333	0.0958999	1	0.00275957	1.0443	0.668279	0.436936	0.471624	0.520788	0.370385	0.462952	0.445586	0.49187	0.416669	0.454269	0.431127	0.468728	0.410877
(+)	E2F1	SP1	MYBL2	166.667	0.0978485	1	0.00275957	1.0443	0.711401	0.436936	0.471624	0.531569	0.370385	0.462952	0.450977	0.49726	0.416669	0.456964	0.433823	0.474119	0.421657
(+)	E2F1	SP1	MYC	195.667	0.110055	1	0.00275957	1.0443	0.817109	0.436936	0.471624	0.557995	0.370385	0.462952	0.46419	0.510474	0.416669	0.463571	0.440429	0.487332	0.448084
(+)	E2F1	SP1	TP53	204.667	0.126234	2	0.00494273	1.0443	0.896394	0.782606	0.471624	0.577817	0.387052	0.54937	0.482434	0.563593	0.468211	0.515902	0.475322	0.523014	0.570989
(+)	E2F1	TP53	MDM2	193.333	0.126812	3	0.00631574	1.0443	0.875145	1	0.471624	0.572504	0.403718	0.603718	0.488111	0.588111	0.503718	0.545915	0.495915	0.538111	0.636692
(+)	E2F1	TP53BP2	PPP1CA	146.667	0.0938895	1	0.00275957	1.0443	0.655228	0.436936	0.471624	0.517525	0.370385	0.462952	0.443955	0.490239	0.416669	0.453454	0.430312	0.467097	0.407614
(+)	E2F1	TP53BP2	PPP1CC	146	0.093843	1	0.00275957	1.0443	0.653676	0.436936	0.471624	0.517137	0.370385	0.462952	0.443761	0.490045	0.416669	0.453357	0.430215	0.466903	0.407226
(+)	E2F1	TP53BP2	TP53	185.667	0.123825	2	0.00494273	1.0443	0.8481	0.782606	0.471624	0.565743	0.387052	0.54937	0.476397	0.557556	0.468211	0.512884	0.472304	0.516977	0.558916
(+)	E2F1	TUBG1	RB1	162.333	0.097253	2	0.00275957	1.0443	0.700215	0.436936	0.471624	0.528772	0.387052	0.462952	0.457912	0.495862	0.425002	0.460432	0.441457	0.476887	0.435527
(+)	E2F1	VEGFC	FLT4	147	0.0960629	1	0.00275957	1.0443	0.66407	0.436936	0.471624	0.519736	0.370385	0.462952	0.44506	0.491344	0.416669	0.454006	0.430864	0.468202	0.409824
(+)	E2F1	hsa-let-7a-5p	HMGA1	149	0.0948951	1	0.00275957	1.50332	0.663821	0.436936	0.678928	0.675151	0.525862	0.61843	0.600507	0.64679	0.572146	0.609468	0.586326	0.623649	0.461588
(+)	E2F1	hsa-let-7a-5p	HMGA2	148.667	0.0954033	1	0.00275957	1.0443	0.665039	0.436936	0.471624	0.519978	0.370385	0.462952	0.445181	0.491465	0.416669	0.454067	0.430925	0.468323	0.410066
(+)	E2F1	hsa-miR-106a-5p	RB1	163.667	0.0976051	2	0.00275957	1.0443	0.70429	0.436936	0.471624	0.529791	0.387052	0.462952	0.458421	0.496371	0.425002	0.460687	0.441711	0.477396	0.436546
(+)	E2F1	hsa-miR-106b-5p	RB1	165.667	0.0973786	2	0.00275957	1.0443	0.707573	0.436936	0.471624	0.530611	0.387052	0.462952	0.458831	0.496782	0.425002	0.460892	0.441917	0.477807	0.437367
(+)	E2F1	hsa-miR-106b-5p	RBL1	150.333	0.0943912	1	0.00275957	1.0443	0.664686	0.436936	0.471624	0.51989	0.370385	0.462952	0.445137	0.491421	0.416669	0.454045	0.430903	0.468279	0.409978
(+)	E2F1	hsa-miR-16-5p	HMGA1	152	0.0944361	1	0.00275957	1.50332	0.668298	0.436936	0.678928	0.67627	0.525862	0.61843	0.601066	0.64735	0.572146	0.609748	0.586606	0.624208	0.462707
(+)	E2F1	hsa-miR-17-5p	RB1	167	0.0979915	2	0.00275957	1.0443	0.712626	0.436936	0.471624	0.531875	0.387052	0.462952	0.459463	0.497413	0.425002	0.461208	0.442233	0.478438	0.43863
(+)	E2F1	hsa-miR-17-5p	RBL1	151.667	0.095004	1	0.00275957	1.0443	0.669739	0.436936	0.471624	0.521153	0.370385	0.462952	0.445769	0.492053	0.416669	0.454361	0.431219	0.468911	0.411242
(+)	E2F1	hsa-miR-20a-5p	RB1	165.667	0.0977444	2	0.00275957	1.0443	0.708945	0.436936	0.471624	0.530954	0.387052	0.462952	0.459003	0.496953	0.425002	0.460978	0.442002	0.477978	0.43771
(+)	E2F1	hsa-miR-20a-5p	RBL1	150.333	0.094757	1	0.00275957	1.0443	0.666058	0.436936	0.471624	0.520233	0.370385	0.462952	0.445309	0.491592	0.416669	0.45413	0.430989	0.468451	0.410321
(+)	E2F1	hsa-miR-25-3p	EZH2	152.333	0.095255	1	0.00427946	1.65134	0.672058	0.677587	0.745776	0.727346	0.575998	0.728729	0.651672	0.728037	0.652363	0.6902	0.652018	0.689855	0.540522
(+)	E2F1	hsa-miR-449a	HDAC1	152	0.0959808	1	0.00275957	1.0443	0.674092	0.436936	0.471624	0.522241	0.370385	0.462952	0.446313	0.492597	0.416669	0.454633	0.431491	0.469455	0.41233
(+)	E2F1	hsa-miR-449a	SIRT1	152.667	0.0958297	1	0.00275957	1.0443	0.674903	0.436936	0.471624	0.522444	0.370385	0.462952	0.446414	0.492698	0.416669	0.454683	0.431541	0.469556	0.412532
(+)	E2F1	hsa-miR-449b-5p	HDAC1	150.333	0.0957693	1	0.00275957	1.0443	0.669855	0.436936	0.471624	0.521182	0.370385	0.462952	0.445783	0.492067	0.416669	0.454368	0.431226	0.468925	0.411271
(+)	E2F1	hsa-miR-449b-5p	SIRT1	151	0.0956182	1	0.00275957	1.0443	0.670666	0.436936	0.471624	0.521385	0.370385	0.462952	0.445885	0.492168	0.416669	0.454418	0.431277	0.469027	0.411473
(+)	E2F2	KPNA2	E2F3	143.333	0.0119307	0	0	0	0.340898	0	0	0.0852244	0	0	0.0426122	0.0426122	0	0.0213061	0.0213061	0.0426122	0.0852244
(+)	E2F2	MYC	KPNA2	105	0.0183988	0	0	0	0.285959	0	0	0.0714899	0	0	0.0357449	0.0357449	0	0.0178725	0.0178725	0.0357449	0.0714899
(+)	E2F2	TUBG1	RB1	89.3333	0.00762761	1	0	0	0.213186	0	0	0.0532964	0.0166667	0	0.0349815	0.0266482	0.00833333	0.0174908	0.0216574	0.0308149	0.0699631
(+)	E2F3	MYC	KPNA2	109.333	0.0219092	0	0	0	0.308081	0	0	0.0770203	0	0	0.0385101	0.0385101	0	0.0192551	0.0192551	0.0385101	0.0770203
(+)	E2F3	TUBG1	RB1	93.6667	0.0111381	1	0	0	0.235307	0	0	0.0588268	0.0166667	0	0.0377467	0.0294134	0.00833333	0.0188734	0.02304	0.0335801	0.0754935
(+)	E2F3	hsa-miR-106b-5p	RB1	97	0.0112637	1	0	0	0.242665	0	0	0.0606664	0.0166667	0	0.0386665	0.0303332	0.00833333	0.0193333	0.0234999	0.0344998	0.077333
(+)	EGLN1	HIF1A	SIAH1	12	0.00328534	0	0.00231677	0	0.0371173	0.366824	0	0.00927933	0	0.0917061	0.00463967	0.0504927	0.0458531	0.0481729	0.0252464	0.0275662	0.100985
(+)	EGLN3	HIF1A	SIAH1	12.6667	0.00329852	0	0.00231677	0	0.0385442	0.366824	0	0.00963605	0	0.0917061	0.00481802	0.0506711	0.0458531	0.0482621	0.0253355	0.0277446	0.101342
(+)	ELF4	MDM2	TP53	56.6667	0.0332873	2	0.00355616	0	0.241947	0.563064	0	0.0604867	0.0333333	0.140766	0.04691	0.100626	0.0870497	0.093838	0.0669798	0.0737682	0.234586
(+)	GLI1	SNAI1	LEF1	25.6667	0.0143285	0	0.00330888	0	0.106779	0.52391	0	0.0266948	0	0.130978	0.0133474	0.0788362	0.0654888	0.0721625	0.0394181	0.0460918	0.157672
(+)	GLI2	SNAI1	LEF1	23.6667	0.0139092	0	0.00260675	0	0.101074	0.412738	0	0.0252685	0	0.103185	0.0126343	0.0642265	0.0515923	0.0579094	0.0321133	0.0384304	0.128453
(+)	GSK3B	MYC	hsa-miR-26a-5p	47.6667	0.0220191	0	0.00120549	0	0.181083	0.19087	0	0.0452707	0	0.0477176	0.0226354	0.0464941	0.0238588	0.0351765	0.0232471	0.0345648	0.0929883
(+)	HDAC1	SIN3A	PA2G4	18	0.00662737	0	0	0	0.0620507	0	0	0.0155127	0	0	0.00775633	0.00775633	0	0.00387817	0.00387817	0.00775633	0.0155127
(+)	HDAC1	TP53	RB1	70.3333	0.0358769	2	0.00218316	0	0.279898	0.34567	0	0.0699745	0.0333333	0.0864175	0.0516539	0.078196	0.0598754	0.0690357	0.0557647	0.064925	0.189725
(+)	HIC1	SIRT1	TP53	54	0.0329315	1	0.00218316	0	0.235103	0.34567	0	0.0587757	0.0166667	0.0864175	0.0377212	0.0725966	0.0515421	0.0620693	0.0446316	0.0551589	0.16186
(+)	HIF1A	TWIST1	TP53	56.3333	0.0450773	1	0.00449993	0	0.285485	0.712494	0	0.0713712	0.0166667	0.178124	0.0440189	0.124747	0.0973951	0.111071	0.070707	0.0843832	0.266161
(+)	JUN	TP53	MDM2	58.6667	0.0346237	2	0.00355616	0	0.251092	0.563064	0	0.0627731	0.0333333	0.140766	0.0480532	0.10177	0.0870497	0.0944096	0.0675514	0.0749114	0.236872
(+)	JUN	TP53	hsa-miR-155-5p	53	0.032407	1	0.00218316	0	0.231069	0.34567	0	0.0577673	0.0166667	0.0864175	0.037217	0.0720924	0.0515421	0.0618172	0.0443795	0.0546547	0.160851
(+)	LEF1	TWIST1	SNAI1	27.6667	0.0269166	0	0.00213546	0	0.158132	0.338118	0	0.039533	0	0.0845295	0.0197665	0.0620312	0.0422647	0.052148	0.0310156	0.0408988	0.124062
(+)	MAP2K1	MAPK1	PEBP4	12.3333	0.00252866	2	0.00116657	0	0.0349676	0.184709	0	0.0087419	0.0333333	0.0461772	0.0210376	0.0274596	0.0397553	0.0336074	0.0303965	0.0242486	0.0882525
(+)	MAP2K1	MAPK3	PEBP4	9.66667	0.00160381	1	0.00109575	0	0.0259886	0.173495	0	0.00649716	0.0166667	0.0433738	0.0115819	0.0249355	0.0300202	0.0274779	0.0208011	0.0182587	0.0665376
(+)	MAP2K2	MAPK1	PEBP4	10.6667	0.00228044	1	0.00116657	0	0.0305929	0.184709	0	0.00764824	0.0166667	0.0461772	0.0121575	0.0269127	0.031422	0.0291673	0.0217897	0.0195351	0.0704921
(+)	MAP2K2	MAPK3	PEBP4	8	0.00135558	0	0.00109575	0	0.021614	0.173495	0	0.0054035	0	0.0433738	0.00270175	0.0243886	0.0216869	0.0230378	0.0121943	0.0135452	0.0487773
(+)	MDM2	MDM4	TP53	54.3333	0.0334136	2	0.00355616	0.682307	0.2376	0.563064	0.308142	0.290507	0.26444	0.371873	0.277473	0.33119	0.318156	0.324673	0.297815	0.304332	0.310535
(+)	MDM2	TP53	hsa-miR-143-3p	56.6667	0.0341636	2	0.00355616	0	0.245234	0.563064	0	0.0613085	0.0333333	0.140766	0.0473209	0.101037	0.0870497	0.0940434	0.0671853	0.0741791	0.235408
(+)	MDM2	TP53	hsa-miR-145-5p	58.3333	0.0342666	2	0.00355616	0	0.249064	0.563064	0	0.062266	0.0333333	0.140766	0.0477997	0.101516	0.0870497	0.0942828	0.0674247	0.0746578	0.236365
(+)	MYC	hsa-miR-18a-5p	SMAD4	46	0.0167012	0	0.00178403	0	0.157691	0.282473	0	0.0394227	0	0.0706183	0.0197114	0.0550205	0.0353092	0.0451648	0.0275103	0.0373659	0.110041
(+)	MYC	hsa-miR-26a-5p	SMAD4	47.6667	0.0163706	0	0.00178403	0	0.159894	0.282473	0	0.0399736	0	0.0706183	0.0199868	0.0552959	0.0353092	0.0453025	0.027648	0.0376414	0.110592
(+)	SIRT1	TP53	hsa-miR-34a-5p	60	0.0357046	1	0.00260531	0	0.257902	0.41251	0	0.0644754	0.0166667	0.103128	0.040571	0.0838015	0.0598971	0.0718493	0.0502341	0.0621863	0.18427
(+)	SMAD2	SNAI1	ZEB1	32	0.0145012	0	0.00180033	0	0.120512	0.285055	0	0.0301281	0	0.0712638	0.015064	0.0506959	0.0356319	0.0431639	0.025348	0.03288	0.101392
(+)	SMAD2	SNAI1	hsa-miR-200b-3p	28.3333	0.0131047	0	0.00434248	0	0.107698	0.687565	0	0.0269245	0	0.171891	0.0134623	0.0994079	0.0859456	0.0926768	0.049704	0.0564351	0.198816
(+)	SMAD3	SNAI1	ZEB1	33.6667	0.0149312	0	0.00188748	0	0.125569	0.298854	0	0.0313923	0	0.0747135	0.0156961	0.0530529	0.0373568	0.0452048	0.0265265	0.0343745	0.106106
(+)	SMAD3	hsa-miR-200a-3p	ZEB2	18.3333	0.00269347	0	0.00312785	0	0.0479825	0.495248	0	0.0119956	0	0.123812	0.00599782	0.0679038	0.0619059	0.0649049	0.0339519	0.0369508	0.135808
(+)	SMAD3	hsa-miR-200b-3p	ZEB2	21	0.00427801	0	0.00442963	0	0.0594361	0.701364	0	0.014859	0	0.175341	0.00742951	0.0951	0.0876705	0.0913852	0.04755	0.0512648	0.1902
(+)	SMAD4	SNAI1	ZEB1	34.3333	0.0156854	0	0.00178403	0	0.129776	0.282473	0	0.0324439	0	0.0706183	0.016222	0.0515311	0.0353092	0.0434201	0.0257656	0.0338765	0.103062
(+)	YWHAB	YWHAZ	YWHAE	17.3333	0.0057882	0	0.0006701	0	0.0575254	0.1061	0	0.0143813	0	0.026525	0.00719067	0.0204532	0.0132625	0.0168578	0.0102266	0.0138219	0.0409063

## Sheet: Top ranked FBLs in melanoma
Top ranked feedback loops in melanoma
Type	Node1	Node2	Node3
(+)	CDKN2A	E2F1	TP53
(+)	E2F1	MDM2	TP53
(+)	E2F1	TP53	MDM2
(+)	E2F1	MDM4	TP53
(-)	E2F1	TP53	hsa-miR-205-5p
(-)	E2F1	TP53	RB1
(-)	E2F1	hsa-miR-25-3p	TP53
(+)	E2F1	SP1	TP53
(+)	E2F1	FOXO3	TP53
(-)	CDKN2A	MDM2	E2F1
(-)	E2F1	SIRT1	TP53
(-)	E2F1	MDM4	MDM2
(-)	BCL2	TP53	E2F1
(+)	CCNB1	CDK2	E2F1
(+)	AKT1	MDM2	E2F1
(+)	CCNA2	CDK2	E2F1
(+)	CCNE2	CDK2	E2F1
(+)	E2F1	KIAA1524	MYC
(-)	CCNB1	CDK1	E2F1
(-)	CCNB1	CDC20	E2F1
(+)	E2F1	KIAA1524	PPP2R2A
(+)	E2F1	KIAA1524	PPP2R1A
(+)	E2F1	KIAA1524	PPP2R1B
(+)	E2F1	KIAA1524	PPP2R2D
(-)	E2F1	RB1	E2F3
(+)	E2F1	E2F2	MYC
(-)	AXIN2	CTNNB1	LEF1

## Sheet: Weighting scenarios
Weighting scenarios for motif prioritization
Sets	W1	W2	W3	W4
Set 1	1	0	0	0
	0	0	1	0
	0	0	0	1
Set 2	1/4	0	0	3/4
	0	1/4	0	3/4
	0	0	1/4	3/4
Set 3	1/8	1/8	0	3/4
	1/8	0	1/8	3/4
	0	1/8	1/8	3/4
Set4	1/16	1/16	1/8	3/4
	1/16	1/8	1/16	3/4
	1/8	1/16	1/16	3/4
Set5	1/4	1/4	1/4	1/4

## Sheet: Regulatory Core Interactions
Melanoma regulatory core interactions
Source	Interaction Type	Target
AKT1	1	BCL2
AKT1	1	MDM2
AKT1	1	FOXO3
AXIN2	1	AXIN2
AXIN2	-1	CTNNB1
BCL2	-1	TP53
CCNA2	1	CDK2
CCNA2	1	CDK1
CCNA2	-1	E2F1
CCNA2	-1	RB1
CCNB1	1	CDC20
CCNB1	1	CDK1
CCNB1	1	CDK2
CCNB1	1	CCNB1
CCNE2	1	CDK2
CDC20	-1	E2F1
CDC20	-1	CCNA2
CDC20	-1	CDK1
CDK1	1	CCNB1
CDK1	1	CDC20
CDK1	-1	E2F1
CDK1	-1	RB1
CDK2	-1	CDK2
CDK2	1	E2F1
CDK2	-1	RB1
CDK2	1	CDK1
CDKN2A	-1	E2F1
CDKN2A	-1	MDM2
CTNNB1	1	AXIN2
CTNNB1	-1	CTNNB1
CTNNB1	1	LEF1
CTNNB1	1	MYC
E2F1	1	AXIN2
E2F1	1	BCL2
E2F1	1	CCNA2
E2F1	1	CCNB1
E2F1	1	CDKN2A
E2F1	1	E2F2
E2F1	1	FOXO3
E2F1	-1	MDM2
E2F1	-1	MDM4
E2F1	1	MYC
E2F1	1	SIRT1
E2F1	1	SP1
E2F1	1	TP53
E2F1	1	hsa-miR-25-3p
E2F1	1	AKT1
E2F1	1	CCNE2
E2F1	1	CDK1
E2F1	1	KIAA1524
E2F1	1	RB1
E2F2	0	CDKN2A
E2F2	1	CCNA2
E2F2	1	CCNB1
E2F2	1	E2F1
E2F2	1	MYC
E2F2	1	AXIN2
E2F2	1	CCNE2
E2F2	1	CDK1
E2F2	1	E2F2
E2F2	1	FOXO3
E2F2	1	KIAA1524
E2F3	0	CDKN2A
E2F3	1	CCNA2
E2F3	1	CCNB1
E2F3	1	E2F1
E2F3	1	MYC
E2F3	1	AXIN2
E2F3	1	BCL2
E2F3	1	CCNE2
E2F3	1	CDK1
E2F3	1	E2F2
E2F3	1	FOXO3
E2F3	1	KIAA1524
FOXO3	1	TP53
FOXO3	0	FOXO3
hsa-miR-205-5p	-1	E2F1
hsa-miR-25-3p	-1	MDM2
hsa-miR-25-3p	-1	TP53
KIAA1524	1	MYC
KIAA1524	-1	PPP2R1A
KIAA1524	-1	PPP2R1B
KIAA1524	-1	PPP2R2A
KIAA1524	-1	PPP2R2D
LEF1	1	AXIN2
LEF1	1	E2F1
LEF1	1	MYC
MDM2	1	E2F1
MDM2	-1	MDM4
MDM2	-1	RB1
MDM2	-1	TP53
MDM2	-1	FOXO3
MDM2	-1	MYC
MDM4	1	MDM2
MDM4	-1	TP53
MYC	0	SP1
MYC	1	CDKN2A
MYC	1	E2F1
PPP2R1A	0	PPP2R2A
PPP2R1A	0	PPP2R2D
PPP2R1A	-1	AKT1
PPP2R1A	-1	E2F1
PPP2R1A	-1	MYC
PPP2R1A	1	RB1
PPP2R1B	0	PPP2R2A
PPP2R1B	-1	AKT1
PPP2R1B	-1	E2F1
PPP2R1B	-1	MYC
PPP2R1B	1	RB1
PPP2R2A	0	PPP2R1B
PPP2R2A	-1	AKT1
PPP2R2A	-1	E2F1
PPP2R2A	-1	MYC
PPP2R2A	1	RB1
PPP2R2D	0	PPP2R1A
PPP2R2D	-1	AKT1
PPP2R2D	-1	E2F1
PPP2R2D	-1	MYC
PPP2R2D	1	RB1
RB1	-1	E2F1
RB1	-1	E2F2
RB1	-1	E2F3
RB1	1	RB1
SIRT1	1	AKT1
SIRT1	-1	E2F1
SIRT1	-1	FOXO3
SIRT1	-1	TP53
SP1	0	MYC
SP1	1	E2F1
SP1	0	CDKN2A
SP1	0	TP53
SP1	1	SIRT1
TP53	-1	BCL2
TP53	-1	CDKN2A
TP53	1	FOXO3
TP53	1	MDM2
TP53	1	TP53
TP53	1	hsa-miR-205-5p
TP53	0	RB1
TP53	1	CDC20
TP53	1	E2F1
AR	1	CCNA2
AR	-1	CCNB1
AR	1	CDK1
AR	1	MYC
ESR1	0	TP53
ESR1	-1	BCL2
FGFR1	1	PPP2R1A
FGFR1	1	PPP2R1B
FGFR1	1	PPP2R2A
FGFR1	1	PPP2R2D
FLT4	1	E2F1
NR2F2	1	E2F1
NR4A1	-1	BCL2
NR4A1	1	E2F1
TGFBR1	1	PPP2R1A
TGFBR1	1	PPP2R1B
TGFBR1	1	PPP2R2A
TGFBR1	1	PPP2R2D
TGFBR2	1	PPP2R1A
TGFBR2	1	PPP2R1B
TGFBR2	1	PPP2R2A
TGFBR2	1	PPP2R2D
THRA	1	CTNNB1
THRA	-1	E2F1
THRB	-1	E2F1
THRB	1	MYC
CDH1	-1	CTNNB1
SNAI1	1	LEF1
ZEB1	-1	CDKN2A
AKT1	1	VIM
CDK1	-1	VIM
CTNNB1	1	CDH1
CTNNB1	1	SNAI1
E2F1	1	ZEB1
hsa-miR-205-5p	-1	ZEB1
hsa-miR-25-3p	-1	CDH1
LEF1	1	SNAI1
MDM2	-1	CDH1
CDH1	-1	EMT
SNAI1	1	EMT
ZEB1	1	EMT
VIM	1	EMT
