# Supplementary material
Source: Preprints.org preprint supplement (doi:10.20944/preprints202108.0327.v2)
Supplement: Supplementary file 2 [file Supplementary file 2.xlsx]

## Sheet: Single_perturbation_in
Input										Regulatory network																																		Output
AR	ESR1	FGFR1	FLT4	NR2F2	NR4A1	TGFBR1	TGFBR2	THRA	THRB	CCNB1	CDK1	PPP2R1B	CDC20	CCNA2	PPP2R2A	CCNE2	CDKN2A	RB1	BCL2	CDK2	PPP2R1A	E2F2	MDM4	PPP2R2D	E2F3	KIAA1524	E2F1	MDM2	TP53	MYC	SP1	LEF1	AXIN2	hsa-miR-205-5p	AKT1	hsa-miR-25-3p	CTNNB1	SIRT1	FOXO3	VIM	ZEB1	CDH1	SNAI1	EMT
#	1	1	#	1	1	1	#	0	#	#	#	#	#	#	#	#	#	#	#	#	#	#	1	#	#	#	#	#	#	#	#	#	#	#	#	#	#	#	#	#	#	#	#	#
#	1	1	#	1	1	1	#	0	#	1	1	1	1	1	1	1	1	1	1	1	0	1	1	0	NaN	1	1	1	0	1	1	1	1	0	0	1	1	1	0	#	#	#	#	#
#	1	1	#	1	1	1	#	0	#	0	NaN	NaN	NaN	NaN	NaN	NaN	NaN	NaN	NaN	NaN	NaN	NaN	1	NaN	NaN	NaN	NaN	NaN	NaN	NaN	NaN	NaN	NaN	#	NaN	NaN	NaN	NaN	NaN	#	#	#	#	#
#	1	1	#	1	1	1	#	0	#	NaN	0	NaN	NaN	NaN	NaN	NaN	NaN	NaN	NaN	NaN	NaN	NaN	1	NaN	NaN	NaN	NaN	NaN	NaN	NaN	NaN	NaN	NaN	#	NaN	NaN	NaN	NaN	NaN	#	#	#	#	#
#	1	1	#	1	1	1	#	0	#	NaN	NaN	0	NaN	NaN	NaN	NaN	NaN	NaN	NaN	NaN	NaN	NaN	1	NaN	NaN	NaN	NaN	NaN	NaN	NaN	NaN	NaN	NaN	#	NaN	NaN	NaN	NaN	NaN	#	#	#	#	#
#	1	1	#	1	1	1	#	0	#	NaN	NaN	NaN	0	NaN	NaN	NaN	NaN	NaN	NaN	NaN	NaN	NaN	1	NaN	NaN	NaN	NaN	NaN	NaN	NaN	NaN	NaN	NaN	#	NaN	NaN	NaN	NaN	NaN	#	#	#	#	#
#	1	1	#	1	1	1	#	0	#	NaN	NaN	NaN	NaN	0	NaN	NaN	NaN	NaN	NaN	NaN	NaN	NaN	1	NaN	NaN	NaN	NaN	NaN	NaN	NaN	NaN	NaN	NaN	#	NaN	NaN	NaN	NaN	NaN	#	#	#	#	#
#	1	1	#	1	1	1	#	0	#	NaN	NaN	NaN	NaN	NaN	0	NaN	NaN	NaN	NaN	NaN	NaN	NaN	1	NaN	NaN	NaN	NaN	NaN	NaN	NaN	NaN	NaN	NaN	#	NaN	NaN	NaN	NaN	NaN	#	#	#	#	#
#	1	1	#	1	1	1	#	0	#	NaN	NaN	NaN	NaN	NaN	NaN	0	NaN	NaN	NaN	NaN	NaN	NaN	1	NaN	NaN	NaN	NaN	NaN	NaN	NaN	NaN	NaN	NaN	#	NaN	NaN	NaN	NaN	NaN	#	#	#	#	#
#	1	1	#	1	1	1	#	0	#	NaN	NaN	NaN	NaN	NaN	NaN	NaN	0	NaN	NaN	NaN	NaN	NaN	1	NaN	NaN	NaN	NaN	NaN	NaN	NaN	NaN	NaN	NaN	#	NaN	NaN	NaN	NaN	NaN	#	#	#	#	#
#	1	1	#	1	1	1	#	0	#	NaN	NaN	NaN	NaN	NaN	NaN	NaN	NaN	0	NaN	NaN	NaN	NaN	1	NaN	NaN	NaN	NaN	NaN	NaN	NaN	NaN	NaN	NaN	#	NaN	NaN	NaN	NaN	NaN	#	#	#	#	#
#	1	1	#	1	1	1	#	0	#	NaN	NaN	NaN	NaN	NaN	NaN	NaN	NaN	NaN	0	NaN	NaN	NaN	1	NaN	NaN	NaN	NaN	NaN	NaN	NaN	NaN	NaN	NaN	#	NaN	NaN	NaN	NaN	NaN	#	#	#	#	#
#	1	1	#	1	1	1	#	0	#	NaN	NaN	NaN	NaN	NaN	NaN	NaN	NaN	NaN	NaN	0	NaN	NaN	1	NaN	NaN	NaN	NaN	NaN	NaN	NaN	NaN	NaN	NaN	#	NaN	NaN	NaN	NaN	NaN	#	#	#	#	#
#	1	1	#	1	1	1	#	0	#	NaN	NaN	NaN	NaN	NaN	NaN	NaN	NaN	NaN	NaN	NaN	1	NaN	1	NaN	NaN	NaN	NaN	NaN	NaN	NaN	NaN	NaN	NaN	#	NaN	NaN	NaN	NaN	NaN	#	#	#	#	#
#	1	1	#	1	1	1	#	0	#	NaN	NaN	NaN	NaN	NaN	NaN	NaN	NaN	NaN	NaN	NaN	NaN	0	1	NaN	NaN	NaN	NaN	NaN	NaN	NaN	NaN	NaN	NaN	#	NaN	NaN	NaN	NaN	NaN	#	#	#	#	#
#	1	1	#	1	1	1	#	0	#	NaN	NaN	NaN	NaN	NaN	NaN	NaN	NaN	NaN	NaN	NaN	NaN	NaN	0	NaN	NaN	NaN	NaN	NaN	NaN	NaN	NaN	NaN	NaN	#	NaN	NaN	NaN	NaN	NaN	#	#	#	#	#
#	1	1	#	1	1	1	#	0	#	NaN	NaN	NaN	NaN	NaN	NaN	NaN	NaN	NaN	NaN	NaN	NaN	NaN	1	1	NaN	NaN	NaN	NaN	NaN	NaN	NaN	NaN	NaN	#	NaN	NaN	NaN	NaN	NaN	#	#	#	#	#
#	1	1	#	1	1	1	#	0	#	NaN	NaN	NaN	NaN	NaN	NaN	NaN	NaN	NaN	NaN	NaN	NaN	NaN	1	NaN	NaN	NaN	NaN	NaN	NaN	NaN	NaN	NaN	NaN	#	NaN	NaN	NaN	NaN	NaN	#	#	#	#	#
#	1	1	#	1	1	1	#	0	#	NaN	NaN	NaN	NaN	NaN	NaN	NaN	NaN	NaN	NaN	NaN	NaN	NaN	1	NaN	NaN	0	NaN	NaN	NaN	NaN	NaN	NaN	NaN	#	NaN	NaN	NaN	NaN	NaN	#	#	#	#	#
#	1	1	#	1	1	1	#	0	#	NaN	NaN	NaN	NaN	NaN	NaN	NaN	NaN	NaN	NaN	NaN	NaN	NaN	1	NaN	NaN	NaN	0	NaN	NaN	NaN	NaN	NaN	NaN	#	NaN	NaN	NaN	NaN	NaN	#	#	#	#	#
#	1	1	#	1	1	1	#	0	#	NaN	NaN	NaN	NaN	NaN	NaN	NaN	NaN	NaN	NaN	NaN	NaN	NaN	1	NaN	NaN	NaN	NaN	0	NaN	NaN	NaN	NaN	NaN	#	NaN	NaN	NaN	NaN	NaN	#	#	#	#	#
#	1	1	#	1	1	1	#	0	#	NaN	NaN	NaN	NaN	NaN	NaN	NaN	NaN	NaN	NaN	NaN	NaN	NaN	1	NaN	NaN	NaN	NaN	NaN	1	NaN	NaN	NaN	NaN	#	NaN	NaN	NaN	NaN	NaN	#	#	#	#	#
#	1	1	#	1	1	1	#	0	#	NaN	NaN	NaN	NaN	NaN	NaN	NaN	NaN	NaN	NaN	NaN	NaN	NaN	1	NaN	NaN	NaN	NaN	NaN	NaN	0	NaN	NaN	NaN	#	NaN	NaN	NaN	NaN	NaN	#	#	#	#	#
#	1	1	#	1	1	1	#	0	#	NaN	NaN	NaN	NaN	NaN	NaN	NaN	NaN	NaN	NaN	NaN	NaN	NaN	1	NaN	NaN	NaN	NaN	NaN	NaN	NaN	0	NaN	NaN	#	NaN	NaN	NaN	NaN	NaN	#	#	#	#	#
#	1	1	#	1	1	1	#	0	#	NaN	NaN	NaN	NaN	NaN	NaN	NaN	NaN	NaN	NaN	NaN	NaN	NaN	1	NaN	NaN	NaN	NaN	NaN	NaN	NaN	NaN	0	NaN	#	NaN	NaN	NaN	NaN	NaN	#	#	#	#	#
#	1	1	#	1	1	1	#	0	#	NaN	NaN	NaN	NaN	NaN	NaN	NaN	NaN	NaN	NaN	NaN	NaN	NaN	1	NaN	NaN	NaN	NaN	NaN	NaN	NaN	NaN	NaN	0	#	NaN	NaN	NaN	NaN	NaN	#	#	#	#	#
#	1	1	#	1	1	1	#	0	#	NaN	NaN	NaN	NaN	NaN	NaN	NaN	NaN	NaN	NaN	NaN	NaN	NaN	1	NaN	NaN	NaN	NaN	NaN	NaN	NaN	NaN	NaN	NaN	1	NaN	NaN	NaN	NaN	NaN	#	#	#	#	#
#	1	1	#	1	1	1	#	0	#	NaN	NaN	NaN	NaN	NaN	NaN	NaN	NaN	NaN	NaN	NaN	NaN	NaN	1	NaN	NaN	NaN	NaN	NaN	NaN	NaN	NaN	NaN	NaN	#	1	NaN	NaN	NaN	NaN	#	#	#	#	#
#	1	1	#	1	1	1	#	0	#	NaN	NaN	NaN	NaN	NaN	NaN	NaN	NaN	NaN	NaN	NaN	NaN	NaN	1	NaN	NaN	NaN	NaN	NaN	NaN	NaN	NaN	NaN	NaN	#	NaN	0	NaN	NaN	NaN	#	#	#	#	#
#	1	1	#	1	1	1	#	0	#	NaN	NaN	NaN	NaN	NaN	NaN	NaN	NaN	NaN	NaN	NaN	NaN	NaN	1	NaN	NaN	NaN	NaN	NaN	NaN	NaN	NaN	NaN	NaN	#	NaN	NaN	0	NaN	NaN	#	#	#	#	#
#	1	1	#	1	1	1	#	0	#	NaN	NaN	NaN	NaN	NaN	NaN	NaN	NaN	NaN	NaN	NaN	NaN	NaN	1	NaN	NaN	NaN	NaN	NaN	NaN	NaN	NaN	NaN	NaN	#	NaN	NaN	NaN	0	NaN	#	#	#	#	#
#	1	1	#	1	1	1	#	0	#	NaN	NaN	NaN	NaN	NaN	NaN	NaN	NaN	NaN	NaN	NaN	NaN	NaN	1	NaN	NaN	NaN	NaN	NaN	NaN	NaN	NaN	NaN	NaN	#	NaN	NaN	NaN	NaN	1	#	#	#	#	#

## Sheet: Single_perturbation_out
Input										Regulatory network																																		Output
AR	ESR1	FGFR1	FLT4	NR2F2	NR4A1	TGFBR1	TGFBR2	THRA	THRB	CCNB1	CDK1	PPP2R1B	CDC20	CCNA2	PPP2R2A	CCNE2	CDKN2A	RB1	BCL2	CDK2	PPP2R1A	E2F2	MDM4	PPP2R2D	E2F3	KIAA1524	E2F1	MDM2	TP53	MYC	SP1	LEF1	AXIN2	hsa-miR-205-5p	AKT1	hsa-miR-25-3p	CTNNB1	SIRT1	FOXO3	VIM	ZEB1	CDH1	SNAI1	EMT
NaN	1	1	NaN	1	1	1	NaN	0	NaN	1	1	1	1	1	1	1	1	1	1	1	0	1	1	0	NaN	1	1	1	0	1	1	1	1	0	0	1	1	1	0	0	1	0	1	3
NaN	1	1	NaN	1	1	1	NaN	0	NaN	1	1	1	1	1	1	1	1	1	1	1	0	1	1	0	NaN	1	1	1	0	1	1	1	1	0	0	1	1	1	0	0	1	0	1	3
NaN	1	1	NaN	1	1	1	NaN	0	NaN	0	1	1	1	1	1	1	1	1	1	1	0	1	1	0	NaN	1	1	1	0	1	1	1	1	0	0	1	1	1	0	0	1	0	1	3
NaN	1	1	NaN	1	1	1	NaN	0	NaN	1	0	1	1	1	1	1	1	1	1	1	0	1	1	0	NaN	1	1	1	0	1	1	1	1	0	0	1	1	1	0	1	1	0	1	4
NaN	1	1	NaN	1	1	1	NaN	0	NaN	1	1	0	1	1	1	1	1	1	1	1	0	1	1	0	NaN	1	1	1	0	1	1	1	1	0	1	1	1	1	0	1	1	0	1	4
NaN	1	1	NaN	1	1	1	NaN	0	NaN	1	1	1	0	1	1	1	1	1	1	1	0	1	1	0	NaN	1	1	1	0	1	1	1	1	0	0	1	1	1	0	0	1	0	1	3
NaN	1	1	NaN	1	1	1	NaN	0	NaN	1	1	1	1	0	1	1	1	1	1	1	0	1	1	0	NaN	1	1	1	0	1	1	1	1	0	0	1	1	1	0	0	1	0	1	3
NaN	1	1	NaN	1	1	1	NaN	0	NaN	1	1	1	1	1	0	1	1	1	1	1	0	1	1	0	NaN	1	1	1	0	1	1	1	1	0	1	1	1	1	0	1	1	0	1	4
NaN	1	1	NaN	1	1	1	NaN	0	NaN	1	1	1	1	1	1	0	1	1	1	1	0	1	1	0	NaN	1	1	1	0	1	1	1	1	0	0	1	1	1	0	0	1	0	1	3
NaN	1	1	NaN	1	1	1	NaN	0	NaN	1	1	1	1	1	1	1	0	1	1	1	0	1	1	0	NaN	1	1	1	0	1	1	1	1	0	0	1	1	1	0	0	1	0	1	3
NaN	1	1	NaN	1	1	1	NaN	0	NaN	1	1	1	1	1	1	1	1	0	1	1	0	1	1	0	NaN	1	1	1	0	1	1	1	1	0	0	1	1	1	0	0	1	0	1	3
NaN	1	1	NaN	1	1	1	NaN	0	NaN	1	1	1	1	1	1	1	1	1	0	1	0	1	1	0	NaN	1	1	1	1	1	1	1	1	1	0	1	1	1	1	0	1	0	1	3
NaN	1	1	NaN	1	1	1	NaN	0	NaN	1	1	1	1	1	1	1	1	1	1	0	0	1	1	0	NaN	1	1	1	0	1	1	1	1	0	0	1	1	1	0	0	1	0	1	3
NaN	1	1	NaN	1	1	1	NaN	0	NaN	1	1	1	1	1	1	1	1	1	1	1	1	1	1	0	NaN	1	1	1	0	1	1	1	1	0	0	1	1	1	0	0	1	0	1	3
NaN	1	1	NaN	1	1	1	NaN	0	NaN	1	1	1	1	1	1	1	1	1	1	1	0	0	1	0	NaN	1	1	1	0	1	1	1	1	0	0	1	1	1	0	0	1	0	1	3
NaN	1	1	NaN	1	1	1	NaN	0	NaN	1	1	1	1	1	1	1	1	1	1	1	0	1	0	0	NaN	1	1	0	1	1	1	0	1	1	0	1	0	1	1	0	1	1	0	1
NaN	1	1	NaN	1	1	1	NaN	0	NaN	1	1	1	1	1	1	1	1	1	1	1	0	1	1	1	NaN	1	1	1	0	1	1	1	1	0	0	1	1	1	0	0	1	0	1	3
NaN	1	1	NaN	1	1	1	NaN	0	NaN	1	1	1	1	1	1	1	1	1	1	1	0	1	1	0	NaN	1	1	1	0	1	1	1	1	0	0	1	1	1	0	0	1	0	1	3
NaN	1	1	NaN	1	1	1	NaN	0	NaN	1	1	1	1	1	1	1	1	1	1	1	1	1	1	1	NaN	0	1	1	0	1	1	1	1	0	0	1	1	1	0	0	1	0	1	3
NaN	1	1	NaN	1	1	1	NaN	0	NaN	NaN	NaN	1	NaN	NaN	1	NaN	1	1	NaN	NaN	NaN	NaN	1	NaN	NaN	NaN	0	1	1	NaN	0	NaN	NaN	1	0	0	NaN	0	1	NaN	0	1	NaN	#VALUE!
NaN	1	1	NaN	1	1	1	NaN	0	NaN	1	1	1	1	1	1	1	1	1	1	1	0	1	1	0	NaN	1	1	0	1	1	1	0	1	1	0	1	0	1	1	0	1	1	0	1
NaN	1	1	NaN	1	1	1	NaN	0	NaN	1	1	1	1	1	1	1	1	1	1	1	0	1	1	0	NaN	1	1	1	1	1	1	1	1	1	0	1	1	1	1	0	1	0	1	3
NaN	1	1	NaN	1	1	1	NaN	0	NaN	1	1	1	1	1	1	1	1	1	1	1	0	1	1	0	NaN	1	1	1	0	0	1	1	1	0	0	1	1	1	0	0	1	0	1	3
NaN	1	1	NaN	1	1	1	NaN	0	NaN	1	1	1	1	1	1	1	1	1	1	1	0	1	1	0	NaN	1	1	1	0	1	0	1	1	0	0	1	1	1	0	0	1	0	1	3
NaN	1	1	NaN	1	1	1	NaN	0	NaN	1	1	1	1	1	1	1	1	1	1	1	0	1	1	0	NaN	1	1	1	0	1	1	0	1	0	0	1	1	1	0	0	1	0	1	3
NaN	1	1	NaN	1	1	1	NaN	0	NaN	1	1	1	1	1	1	1	1	1	1	1	0	1	1	0	NaN	1	1	1	0	1	1	1	0	0	0	1	1	1	0	0	1	0	1	3
NaN	1	1	NaN	1	1	1	NaN	0	NaN	1	1	1	1	1	1	1	1	1	1	1	0	1	1	0	NaN	1	1	1	0	1	1	1	1	1	0	1	1	1	0	0	1	0	1	3
NaN	1	1	NaN	1	1	1	NaN	0	NaN	1	1	1	1	1	1	1	1	1	1	1	0	1	1	0	NaN	1	1	1	0	1	1	1	1	0	1	1	1	1	0	1	1	0	1	4
NaN	1	1	NaN	1	1	1	NaN	0	NaN	1	1	1	1	1	1	1	1	1	1	1	0	1	1	0	NaN	1	1	1	1	1	1	0	1	1	0	0	0	1	1	0	1	1	0	1
NaN	1	1	NaN	1	1	1	NaN	0	NaN	1	1	1	1	1	1	1	1	1	1	1	0	1	1	0	NaN	1	1	1	0	1	1	0	1	0	0	1	0	1	0	0	1	0	0	2
NaN	1	1	NaN	1	1	1	NaN	0	NaN	1	1	1	1	1	1	1	1	1	1	1	0	1	1	0	NaN	1	1	1	1	1	1	1	1	1	0	1	1	0	1	0	1	0	1	3
NaN	1	1	NaN	1	1	1	NaN	0	NaN	1	1	1	1	1	1	1	1	1	1	1	0	1	1	0	NaN	1	1	1	0	1	1	1	1	0	0	1	1	1	1	0	1	0	1	3

## Sheet: Double_perturbation_in
Input										Regulatory network																																		Output
AR	ESR1	FGFR1	FLT4	NR2F2	NR4A1	TGFBR1	TGFBR2	THRA	THRB	CCNB1	CDK1	PPP2R1B	CDC20	CCNA2	PPP2R2A	CCNE2	CDKN2A	RB1	BCL2	CDK2	PPP2R1A	E2F2	MDM4	PPP2R2D	E2F3	KIAA1524	E2F1	MDM2	TP53	MYC	SP1	LEF1	AXIN2	hsa-miR-205-5p	AKT1	hsa-miR-25-3p	CTNNB1	SIRT1	FOXO3	VIM	ZEB1	CDH1	SNAI1	EMT
#	1	1	#	1	1	1	#	0	#	#	#	#	#	#	#	#	#	#	#	#	#	#	1	#	#	#	#	#	#	#	#	#	#	#	#	#	#	#	#	#	#	#	#	#
#	1	1	#	1	1	1	#	0	#	1	1	1	1	1	1	1	1	1	1	1	0	1	1	0	NaN	1	1	1	0	1	1	1	1	0	0	1	1	1	0	#	#	#	#	#
#	1	1	#	1	1	1	#	0	#	0	0	NaN	NaN	NaN	NaN	NaN	NaN	NaN	NaN	NaN	NaN	NaN	1	NaN	NaN	NaN	NaN	NaN	NaN	NaN	NaN	NaN	NaN	NaN	NaN	NaN	NaN	NaN	NaN	#	#	#	#	#
#	1	1	#	1	1	1	#	0	#	0	NaN	0	NaN	NaN	NaN	NaN	NaN	NaN	NaN	NaN	NaN	NaN	1	NaN	NaN	NaN	NaN	NaN	NaN	NaN	NaN	NaN	NaN	NaN	NaN	NaN	NaN	NaN	NaN	#	#	#	#	#
#	1	1	#	1	1	1	#	0	#	0	NaN	NaN	0	NaN	NaN	NaN	NaN	NaN	NaN	NaN	NaN	NaN	1	NaN	NaN	NaN	NaN	NaN	NaN	NaN	NaN	NaN	NaN	NaN	NaN	NaN	NaN	NaN	NaN	#	#	#	#	#
#	1	1	#	1	1	1	#	0	#	0	NaN	NaN	NaN	0	NaN	NaN	NaN	NaN	NaN	NaN	NaN	NaN	1	NaN	NaN	NaN	NaN	NaN	NaN	NaN	NaN	NaN	NaN	NaN	NaN	NaN	NaN	NaN	NaN	#	#	#	#	#
#	1	1	#	1	1	1	#	0	#	0	NaN	NaN	NaN	NaN	0	NaN	NaN	NaN	NaN	NaN	NaN	NaN	1	NaN	NaN	NaN	NaN	NaN	NaN	NaN	NaN	NaN	NaN	NaN	NaN	NaN	NaN	NaN	NaN	#	#	#	#	#
#	1	1	#	1	1	1	#	0	#	0	NaN	NaN	NaN	NaN	NaN	0	NaN	NaN	NaN	NaN	NaN	NaN	1	NaN	NaN	NaN	NaN	NaN	NaN	NaN	NaN	NaN	NaN	NaN	NaN	NaN	NaN	NaN	NaN	#	#	#	#	#
#	1	1	#	1	1	1	#	0	#	0	NaN	NaN	NaN	NaN	NaN	NaN	0	NaN	NaN	NaN	NaN	NaN	1	NaN	NaN	NaN	NaN	NaN	NaN	NaN	NaN	NaN	NaN	NaN	NaN	NaN	NaN	NaN	NaN	#	#	#	#	#
#	1	1	#	1	1	1	#	0	#	0	NaN	NaN	NaN	NaN	NaN	NaN	NaN	0	NaN	NaN	NaN	NaN	1	NaN	NaN	NaN	NaN	NaN	NaN	NaN	NaN	NaN	NaN	NaN	NaN	NaN	NaN	NaN	NaN	#	#	#	#	#
#	1	1	#	1	1	1	#	0	#	0	NaN	NaN	NaN	NaN	NaN	NaN	NaN	NaN	0	NaN	NaN	NaN	1	NaN	NaN	NaN	NaN	NaN	NaN	NaN	NaN	NaN	NaN	NaN	NaN	NaN	NaN	NaN	NaN	#	#	#	#	#
#	1	1	#	1	1	1	#	0	#	0	NaN	NaN	NaN	NaN	NaN	NaN	NaN	NaN	NaN	0	NaN	NaN	1	NaN	NaN	NaN	NaN	NaN	NaN	NaN	NaN	NaN	NaN	NaN	NaN	NaN	NaN	NaN	NaN	#	#	#	#	#
#	1	1	#	1	1	1	#	0	#	0	NaN	NaN	NaN	NaN	NaN	NaN	NaN	NaN	NaN	NaN	1	NaN	1	NaN	NaN	NaN	NaN	NaN	NaN	NaN	NaN	NaN	NaN	NaN	NaN	NaN	NaN	NaN	NaN	#	#	#	#	#
#	1	1	#	1	1	1	#	0	#	0	NaN	NaN	NaN	NaN	NaN	NaN	NaN	NaN	NaN	NaN	NaN	0	1	NaN	NaN	NaN	NaN	NaN	NaN	NaN	NaN	NaN	NaN	NaN	NaN	NaN	NaN	NaN	NaN	#	#	#	#	#
#	1	1	#	1	1	1	#	0	#	0	NaN	NaN	NaN	NaN	NaN	NaN	NaN	NaN	NaN	NaN	NaN	NaN	0	NaN	NaN	NaN	NaN	NaN	NaN	NaN	NaN	NaN	NaN	NaN	NaN	NaN	NaN	NaN	NaN	#	#	#	#	#
#	1	1	#	1	1	1	#	0	#	0	NaN	NaN	NaN	NaN	NaN	NaN	NaN	NaN	NaN	NaN	NaN	NaN	1	1	NaN	NaN	NaN	NaN	NaN	NaN	NaN	NaN	NaN	NaN	NaN	NaN	NaN	NaN	NaN	#	#	#	#	#
#	1	1	#	1	1	1	#	0	#	0	NaN	NaN	NaN	NaN	NaN	NaN	NaN	NaN	NaN	NaN	NaN	NaN	1	NaN	NaN	NaN	NaN	NaN	NaN	NaN	NaN	NaN	NaN	NaN	NaN	NaN	NaN	NaN	NaN	#	#	#	#	#
#	1	1	#	1	1	1	#	0	#	0	NaN	NaN	NaN	NaN	NaN	NaN	NaN	NaN	NaN	NaN	NaN	NaN	1	NaN	NaN	0	NaN	NaN	NaN	NaN	NaN	NaN	NaN	NaN	NaN	NaN	NaN	NaN	NaN	#	#	#	#	#
#	1	1	#	1	1	1	#	0	#	0	NaN	NaN	NaN	NaN	NaN	NaN	NaN	NaN	NaN	NaN	NaN	NaN	1	NaN	NaN	NaN	0	NaN	NaN	NaN	NaN	NaN	NaN	NaN	NaN	NaN	NaN	NaN	NaN	#	#	#	#	#
#	1	1	#	1	1	1	#	0	#	0	NaN	NaN	NaN	NaN	NaN	NaN	NaN	NaN	NaN	NaN	NaN	NaN	1	NaN	NaN	NaN	NaN	0	NaN	NaN	NaN	NaN	NaN	NaN	NaN	NaN	NaN	NaN	NaN	#	#	#	#	#
#	1	1	#	1	1	1	#	0	#	0	NaN	NaN	NaN	NaN	NaN	NaN	NaN	NaN	NaN	NaN	NaN	NaN	1	NaN	NaN	NaN	NaN	NaN	1	NaN	NaN	NaN	NaN	NaN	NaN	NaN	NaN	NaN	NaN	#	#	#	#	#
#	1	1	#	1	1	1	#	0	#	0	NaN	NaN	NaN	NaN	NaN	NaN	NaN	NaN	NaN	NaN	NaN	NaN	1	NaN	NaN	NaN	NaN	NaN	NaN	0	NaN	NaN	NaN	NaN	NaN	NaN	NaN	NaN	NaN	#	#	#	#	#
#	1	1	#	1	1	1	#	0	#	0	NaN	NaN	NaN	NaN	NaN	NaN	NaN	NaN	NaN	NaN	NaN	NaN	1	NaN	NaN	NaN	NaN	NaN	NaN	NaN	0	NaN	NaN	NaN	NaN	NaN	NaN	NaN	NaN	#	#	#	#	#
#	1	1	#	1	1	1	#	0	#	0	NaN	NaN	NaN	NaN	NaN	NaN	NaN	NaN	NaN	NaN	NaN	NaN	1	NaN	NaN	NaN	NaN	NaN	NaN	NaN	NaN	0	NaN	NaN	NaN	NaN	NaN	NaN	NaN	#	#	#	#	#
#	1	1	#	1	1	1	#	0	#	0	NaN	NaN	NaN	NaN	NaN	NaN	NaN	NaN	NaN	NaN	NaN	NaN	1	NaN	NaN	NaN	NaN	NaN	NaN	NaN	NaN	NaN	0	NaN	NaN	NaN	NaN	NaN	NaN	#	#	#	#	#
#	1	1	#	1	1	1	#	0	#	0	NaN	NaN	NaN	NaN	NaN	NaN	NaN	NaN	NaN	NaN	NaN	NaN	1	NaN	NaN	NaN	NaN	NaN	NaN	NaN	NaN	NaN	NaN	1	NaN	NaN	NaN	NaN	NaN	#	#	#	#	#
#	1	1	#	1	1	1	#	0	#	0	NaN	NaN	NaN	NaN	NaN	NaN	NaN	NaN	NaN	NaN	NaN	NaN	1	NaN	NaN	NaN	NaN	NaN	NaN	NaN	NaN	NaN	NaN	NaN	1	NaN	NaN	NaN	NaN	#	#	#	#	#
#	1	1	#	1	1	1	#	0	#	0	NaN	NaN	NaN	NaN	NaN	NaN	NaN	NaN	NaN	NaN	NaN	NaN	1	NaN	NaN	NaN	NaN	NaN	NaN	NaN	NaN	NaN	NaN	NaN	NaN	0	NaN	NaN	NaN	#	#	#	#	#
#	1	1	#	1	1	1	#	0	#	0	NaN	NaN	NaN	NaN	NaN	NaN	NaN	NaN	NaN	NaN	NaN	NaN	1	NaN	NaN	NaN	NaN	NaN	NaN	NaN	NaN	NaN	NaN	NaN	NaN	NaN	0	NaN	NaN	#	#	#	#	#
#	1	1	#	1	1	1	#	0	#	0	NaN	NaN	NaN	NaN	NaN	NaN	NaN	NaN	NaN	NaN	NaN	NaN	1	NaN	NaN	NaN	NaN	NaN	NaN	NaN	NaN	NaN	NaN	NaN	NaN	NaN	NaN	0	NaN	#	#	#	#	#
#	1	1	#	1	1	1	#	0	#	0	NaN	NaN	NaN	NaN	NaN	NaN	NaN	NaN	NaN	NaN	NaN	NaN	1	NaN	NaN	NaN	NaN	NaN	NaN	NaN	NaN	NaN	NaN	NaN	NaN	NaN	NaN	NaN	1	#	#	#	#	#
#	1	1	#	1	1	1	#	0	#	NaN	0	0	NaN	NaN	NaN	NaN	NaN	NaN	NaN	NaN	NaN	NaN	1	NaN	NaN	NaN	NaN	NaN	NaN	NaN	NaN	NaN	NaN	NaN	NaN	NaN	NaN	NaN	NaN	#	#	#	#	#
#	1	1	#	1	1	1	#	0	#	NaN	0	NaN	0	NaN	NaN	NaN	NaN	NaN	NaN	NaN	NaN	NaN	1	NaN	NaN	NaN	NaN	NaN	NaN	NaN	NaN	NaN	NaN	NaN	NaN	NaN	NaN	NaN	NaN	#	#	#	#	#
#	1	1	#	1	1	1	#	0	#	NaN	0	NaN	NaN	0	NaN	NaN	NaN	NaN	NaN	NaN	NaN	NaN	1	NaN	NaN	NaN	NaN	NaN	NaN	NaN	NaN	NaN	NaN	NaN	NaN	NaN	NaN	NaN	NaN	#	#	#	#	#
#	1	1	#	1	1	1	#	0	#	NaN	0	NaN	NaN	NaN	0	NaN	NaN	NaN	NaN	NaN	NaN	NaN	1	NaN	NaN	NaN	NaN	NaN	NaN	NaN	NaN	NaN	NaN	NaN	NaN	NaN	NaN	NaN	NaN	#	#	#	#	#
#	1	1	#	1	1	1	#	0	#	NaN	0	NaN	NaN	NaN	NaN	0	NaN	NaN	NaN	NaN	NaN	NaN	1	NaN	NaN	NaN	NaN	NaN	NaN	NaN	NaN	NaN	NaN	NaN	NaN	NaN	NaN	NaN	NaN	#	#	#	#	#
#	1	1	#	1	1	1	#	0	#	NaN	0	NaN	NaN	NaN	NaN	NaN	0	NaN	NaN	NaN	NaN	NaN	1	NaN	NaN	NaN	NaN	NaN	NaN	NaN	NaN	NaN	NaN	NaN	NaN	NaN	NaN	NaN	NaN	#	#	#	#	#
#	1	1	#	1	1	1	#	0	#	NaN	0	NaN	NaN	NaN	NaN	NaN	NaN	0	NaN	NaN	NaN	NaN	1	NaN	NaN	NaN	NaN	NaN	NaN	NaN	NaN	NaN	NaN	NaN	NaN	NaN	NaN	NaN	NaN	#	#	#	#	#
#	1	1	#	1	1	1	#	0	#	NaN	0	NaN	NaN	NaN	NaN	NaN	NaN	NaN	0	NaN	NaN	NaN	1	NaN	NaN	NaN	NaN	NaN	NaN	NaN	NaN	NaN	NaN	NaN	NaN	NaN	NaN	NaN	NaN	#	#	#	#	#
#	1	1	#	1	1	1	#	0	#	NaN	0	NaN	NaN	NaN	NaN	NaN	NaN	NaN	NaN	0	NaN	NaN	1	NaN	NaN	NaN	NaN	NaN	NaN	NaN	NaN	NaN	NaN	NaN	NaN	NaN	NaN	NaN	NaN	#	#	#	#	#
#	1	1	#	1	1	1	#	0	#	NaN	0	NaN	NaN	NaN	NaN	NaN	NaN	NaN	NaN	NaN	1	NaN	1	NaN	NaN	NaN	NaN	NaN	NaN	NaN	NaN	NaN	NaN	NaN	NaN	NaN	NaN	NaN	NaN	#	#	#	#	#
#	1	1	#	1	1	1	#	0	#	NaN	0	NaN	NaN	NaN	NaN	NaN	NaN	NaN	NaN	NaN	NaN	0	1	NaN	NaN	NaN	NaN	NaN	NaN	NaN	NaN	NaN	NaN	NaN	NaN	NaN	NaN	NaN	NaN	#	#	#	#	#
#	1	1	#	1	1	1	#	0	#	NaN	0	NaN	NaN	NaN	NaN	NaN	NaN	NaN	NaN	NaN	NaN	NaN	0	NaN	NaN	NaN	NaN	NaN	NaN	NaN	NaN	NaN	NaN	NaN	NaN	NaN	NaN	NaN	NaN	#	#	#	#	#
#	1	1	#	1	1	1	#	0	#	NaN	0	NaN	NaN	NaN	NaN	NaN	NaN	NaN	NaN	NaN	NaN	NaN	1	1	NaN	NaN	NaN	NaN	NaN	NaN	NaN	NaN	NaN	NaN	NaN	NaN	NaN	NaN	NaN	#	#	#	#	#
#	1	1	#	1	1	1	#	0	#	NaN	0	NaN	NaN	NaN	NaN	NaN	NaN	NaN	NaN	NaN	NaN	NaN	1	NaN	NaN	NaN	NaN	NaN	NaN	NaN	NaN	NaN	NaN	NaN	NaN	NaN	NaN	NaN	NaN	#	#	#	#	#
#	1	1	#	1	1	1	#	0	#	NaN	0	NaN	NaN	NaN	NaN	NaN	NaN	NaN	NaN	NaN	NaN	NaN	1	NaN	NaN	0	NaN	NaN	NaN	NaN	NaN	NaN	NaN	NaN	NaN	NaN	NaN	NaN	NaN	#	#	#	#	#
#	1	1	#	1	1	1	#	0	#	NaN	0	NaN	NaN	NaN	NaN	NaN	NaN	NaN	NaN	NaN	NaN	NaN	1	NaN	NaN	NaN	0	NaN	NaN	NaN	NaN	NaN	NaN	NaN	NaN	NaN	NaN	NaN	NaN	#	#	#	#	#
#	1	1	#	1	1	1	#	0	#	NaN	0	NaN	NaN	NaN	NaN	NaN	NaN	NaN	NaN	NaN	NaN	NaN	1	NaN	NaN	NaN	NaN	0	NaN	NaN	NaN	NaN	NaN	NaN	NaN	NaN	NaN	NaN	NaN	#	#	#	#	#
#	1	1	#	1	1	1	#	0	#	NaN	0	NaN	NaN	NaN	NaN	NaN	NaN	NaN	NaN	NaN	NaN	NaN	1	NaN	NaN	NaN	NaN	NaN	1	NaN	NaN	NaN	NaN	NaN	NaN	NaN	NaN	NaN	NaN	#	#	#	#	#
#	1	1	#	1	1	1	#	0	#	NaN	0	NaN	NaN	NaN	NaN	NaN	NaN	NaN	NaN	NaN	NaN	NaN	1	NaN	NaN	NaN	NaN	NaN	NaN	0	NaN	NaN	NaN	NaN	NaN	NaN	NaN	NaN	NaN	#	#	#	#	#
#	1	1	#	1	1	1	#	0	#	NaN	0	NaN	NaN	NaN	NaN	NaN	NaN	NaN	NaN	NaN	NaN	NaN	1	NaN	NaN	NaN	NaN	NaN	NaN	NaN	0	NaN	NaN	NaN	NaN	NaN	NaN	NaN	NaN	#	#	#	#	#
#	1	1	#	1	1	1	#	0	#	NaN	0	NaN	NaN	NaN	NaN	NaN	NaN	NaN	NaN	NaN	NaN	NaN	1	NaN	NaN	NaN	NaN	NaN	NaN	NaN	NaN	0	NaN	NaN	NaN	NaN	NaN	NaN	NaN	#	#	#	#	#
#	1	1	#	1	1	1	#	0	#	NaN	0	NaN	NaN	NaN	NaN	NaN	NaN	NaN	NaN	NaN	NaN	NaN	1	NaN	NaN	NaN	NaN	NaN	NaN	NaN	NaN	NaN	0	NaN	NaN	NaN	NaN	NaN	NaN	#	#	#	#	#
#	1	1	#	1	1	1	#	0	#	NaN	0	NaN	NaN	NaN	NaN	NaN	NaN	NaN	NaN	NaN	NaN	NaN	1	NaN	NaN	NaN	NaN	NaN	NaN	NaN	NaN	NaN	NaN	1	NaN	NaN	NaN	NaN	NaN	#	#	#	#	#
#	1	1	#	1	1	1	#	0	#	NaN	0	NaN	NaN	NaN	NaN	NaN	NaN	NaN	NaN	NaN	NaN	NaN	1	NaN	NaN	NaN	NaN	NaN	NaN	NaN	NaN	NaN	NaN	NaN	1	NaN	NaN	NaN	NaN	#	#	#	#	#
#	1	1	#	1	1	1	#	0	#	NaN	0	NaN	NaN	NaN	NaN	NaN	NaN	NaN	NaN	NaN	NaN	NaN	1	NaN	NaN	NaN	NaN	NaN	NaN	NaN	NaN	NaN	NaN	NaN	NaN	0	NaN	NaN	NaN	#	#	#	#	#
#	1	1	#	1	1	1	#	0	#	NaN	0	NaN	NaN	NaN	NaN	NaN	NaN	NaN	NaN	NaN	NaN	NaN	1	NaN	NaN	NaN	NaN	NaN	NaN	NaN	NaN	NaN	NaN	NaN	NaN	NaN	0	NaN	NaN	#	#	#	#	#
#	1	1	#	1	1	1	#	0	#	NaN	0	NaN	NaN	NaN	NaN	NaN	NaN	NaN	NaN	NaN	NaN	NaN	1	NaN	NaN	NaN	NaN	NaN	NaN	NaN	NaN	NaN	NaN	NaN	NaN	NaN	NaN	0	NaN	#	#	#	#	#
#	1	1	#	1	1	1	#	0	#	NaN	0	NaN	NaN	NaN	NaN	NaN	NaN	NaN	NaN	NaN	NaN	NaN	1	NaN	NaN	NaN	NaN	NaN	NaN	NaN	NaN	NaN	NaN	NaN	NaN	NaN	NaN	NaN	1	#	#	#	#	#
#	1	1	#	1	1	1	#	0	#	NaN	NaN	0	0	NaN	NaN	NaN	NaN	NaN	NaN	NaN	NaN	NaN	1	NaN	NaN	NaN	NaN	NaN	NaN	NaN	NaN	NaN	NaN	NaN	NaN	NaN	NaN	NaN	NaN	#	#	#	#	#
#	1	1	#	1	1	1	#	0	#	NaN	NaN	0	NaN	0	NaN	NaN	NaN	NaN	NaN	NaN	NaN	NaN	1	NaN	NaN	NaN	NaN	NaN	NaN	NaN	NaN	NaN	NaN	NaN	NaN	NaN	NaN	NaN	NaN	#	#	#	#	#
#	1	1	#	1	1	1	#	0	#	NaN	NaN	0	NaN	NaN	0	NaN	NaN	NaN	NaN	NaN	NaN	NaN	1	NaN	NaN	NaN	NaN	NaN	NaN	NaN	NaN	NaN	NaN	NaN	NaN	NaN	NaN	NaN	NaN	#	#	#	#	#
#	1	1	#	1	1	1	#	0	#	NaN	NaN	0	NaN	NaN	NaN	0	NaN	NaN	NaN	NaN	NaN	NaN	1	NaN	NaN	NaN	NaN	NaN	NaN	NaN	NaN	NaN	NaN	NaN	NaN	NaN	NaN	NaN	NaN	#	#	#	#	#
#	1	1	#	1	1	1	#	0	#	NaN	NaN	0	NaN	NaN	NaN	NaN	0	NaN	NaN	NaN	NaN	NaN	1	NaN	NaN	NaN	NaN	NaN	NaN	NaN	NaN	NaN	NaN	NaN	NaN	NaN	NaN	NaN	NaN	#	#	#	#	#
#	1	1	#	1	1	1	#	0	#	NaN	NaN	0	NaN	NaN	NaN	NaN	NaN	0	NaN	NaN	NaN	NaN	1	NaN	NaN	NaN	NaN	NaN	NaN	NaN	NaN	NaN	NaN	NaN	NaN	NaN	NaN	NaN	NaN	#	#	#	#	#
#	1	1	#	1	1	1	#	0	#	NaN	NaN	0	NaN	NaN	NaN	NaN	NaN	NaN	0	NaN	NaN	NaN	1	NaN	NaN	NaN	NaN	NaN	NaN	NaN	NaN	NaN	NaN	NaN	NaN	NaN	NaN	NaN	NaN	#	#	#	#	#
#	1	1	#	1	1	1	#	0	#	NaN	NaN	0	NaN	NaN	NaN	NaN	NaN	NaN	NaN	0	NaN	NaN	1	NaN	NaN	NaN	NaN	NaN	NaN	NaN	NaN	NaN	NaN	NaN	NaN	NaN	NaN	NaN	NaN	#	#	#	#	#
#	1	1	#	1	1	1	#	0	#	NaN	NaN	0	NaN	NaN	NaN	NaN	NaN	NaN	NaN	NaN	1	NaN	1	NaN	NaN	NaN	NaN	NaN	NaN	NaN	NaN	NaN	NaN	NaN	NaN	NaN	NaN	NaN	NaN	#	#	#	#	#
#	1	1	#	1	1	1	#	0	#	NaN	NaN	0	NaN	NaN	NaN	NaN	NaN	NaN	NaN	NaN	NaN	0	1	NaN	NaN	NaN	NaN	NaN	NaN	NaN	NaN	NaN	NaN	NaN	NaN	NaN	NaN	NaN	NaN	#	#	#	#	#
#	1	1	#	1	1	1	#	0	#	NaN	NaN	0	NaN	NaN	NaN	NaN	NaN	NaN	NaN	NaN	NaN	NaN	0	NaN	NaN	NaN	NaN	NaN	NaN	NaN	NaN	NaN	NaN	NaN	NaN	NaN	NaN	NaN	NaN	#	#	#	#	#
#	1	1	#	1	1	1	#	0	#	NaN	NaN	0	NaN	NaN	NaN	NaN	NaN	NaN	NaN	NaN	NaN	NaN	1	1	NaN	NaN	NaN	NaN	NaN	NaN	NaN	NaN	NaN	NaN	NaN	NaN	NaN	NaN	NaN	#	#	#	#	#
#	1	1	#	1	1	1	#	0	#	NaN	NaN	0	NaN	NaN	NaN	NaN	NaN	NaN	NaN	NaN	NaN	NaN	1	NaN	NaN	NaN	NaN	NaN	NaN	NaN	NaN	NaN	NaN	NaN	NaN	NaN	NaN	NaN	NaN	#	#	#	#	#
#	1	1	#	1	1	1	#	0	#	NaN	NaN	0	NaN	NaN	NaN	NaN	NaN	NaN	NaN	NaN	NaN	NaN	1	NaN	NaN	0	NaN	NaN	NaN	NaN	NaN	NaN	NaN	NaN	NaN	NaN	NaN	NaN	NaN	#	#	#	#	#
#	1	1	#	1	1	1	#	0	#	NaN	NaN	0	NaN	NaN	NaN	NaN	NaN	NaN	NaN	NaN	NaN	NaN	1	NaN	NaN	NaN	0	NaN	NaN	NaN	NaN	NaN	NaN	NaN	NaN	NaN	NaN	NaN	NaN	#	#	#	#	#
#	1	1	#	1	1	1	#	0	#	NaN	NaN	0	NaN	NaN	NaN	NaN	NaN	NaN	NaN	NaN	NaN	NaN	1	NaN	NaN	NaN	NaN	0	NaN	NaN	NaN	NaN	NaN	NaN	NaN	NaN	NaN	NaN	NaN	#	#	#	#	#
#	1	1	#	1	1	1	#	0	#	NaN	NaN	0	NaN	NaN	NaN	NaN	NaN	NaN	NaN	NaN	NaN	NaN	1	NaN	NaN	NaN	NaN	NaN	1	NaN	NaN	NaN	NaN	NaN	NaN	NaN	NaN	NaN	NaN	#	#	#	#	#
#	1	1	#	1	1	1	#	0	#	NaN	NaN	0	NaN	NaN	NaN	NaN	NaN	NaN	NaN	NaN	NaN	NaN	1	NaN	NaN	NaN	NaN	NaN	NaN	0	NaN	NaN	NaN	NaN	NaN	NaN	NaN	NaN	NaN	#	#	#	#	#
#	1	1	#	1	1	1	#	0	#	NaN	NaN	0	NaN	NaN	NaN	NaN	NaN	NaN	NaN	NaN	NaN	NaN	1	NaN	NaN	NaN	NaN	NaN	NaN	NaN	0	NaN	NaN	NaN	NaN	NaN	NaN	NaN	NaN	#	#	#	#	#
#	1	1	#	1	1	1	#	0	#	NaN	NaN	0	NaN	NaN	NaN	NaN	NaN	NaN	NaN	NaN	NaN	NaN	1	NaN	NaN	NaN	NaN	NaN	NaN	NaN	NaN	0	NaN	NaN	NaN	NaN	NaN	NaN	NaN	#	#	#	#	#
#	1	1	#	1	1	1	#	0	#	NaN	NaN	0	NaN	NaN	NaN	NaN	NaN	NaN	NaN	NaN	NaN	NaN	1	NaN	NaN	NaN	NaN	NaN	NaN	NaN	NaN	NaN	0	NaN	NaN	NaN	NaN	NaN	NaN	#	#	#	#	#
#	1	1	#	1	1	1	#	0	#	NaN	NaN	0	NaN	NaN	NaN	NaN	NaN	NaN	NaN	NaN	NaN	NaN	1	NaN	NaN	NaN	NaN	NaN	NaN	NaN	NaN	NaN	NaN	1	NaN	NaN	NaN	NaN	NaN	#	#	#	#	#
#	1	1	#	1	1	1	#	0	#	NaN	NaN	0	NaN	NaN	NaN	NaN	NaN	NaN	NaN	NaN	NaN	NaN	1	NaN	NaN	NaN	NaN	NaN	NaN	NaN	NaN	NaN	NaN	NaN	1	NaN	NaN	NaN	NaN	#	#	#	#	#
#	1	1	#	1	1	1	#	0	#	NaN	NaN	0	NaN	NaN	NaN	NaN	NaN	NaN	NaN	NaN	NaN	NaN	1	NaN	NaN	NaN	NaN	NaN	NaN	NaN	NaN	NaN	NaN	NaN	NaN	0	NaN	NaN	NaN	#	#	#	#	#
#	1	1	#	1	1	1	#	0	#	NaN	NaN	0	NaN	NaN	NaN	NaN	NaN	NaN	NaN	NaN	NaN	NaN	1	NaN	NaN	NaN	NaN	NaN	NaN	NaN	NaN	NaN	NaN	NaN	NaN	NaN	0	NaN	NaN	#	#	#	#	#
#	1	1	#	1	1	1	#	0	#	NaN	NaN	0	NaN	NaN	NaN	NaN	NaN	NaN	NaN	NaN	NaN	NaN	1	NaN	NaN	NaN	NaN	NaN	NaN	NaN	NaN	NaN	NaN	NaN	NaN	NaN	NaN	0	NaN	#	#	#	#	#
#	1	1	#	1	1	1	#	0	#	NaN	NaN	0	NaN	NaN	NaN	NaN	NaN	NaN	NaN	NaN	NaN	NaN	1	NaN	NaN	NaN	NaN	NaN	NaN	NaN	NaN	NaN	NaN	NaN	NaN	NaN	NaN	NaN	1	#	#	#	#	#
#	1	1	#	1	1	1	#	0	#	NaN	NaN	NaN	0	0	NaN	NaN	NaN	NaN	NaN	NaN	NaN	NaN	1	NaN	NaN	NaN	NaN	NaN	NaN	NaN	NaN	NaN	NaN	NaN	NaN	NaN	NaN	NaN	NaN	#	#	#	#	#
#	1	1	#	1	1	1	#	0	#	NaN	NaN	NaN	0	NaN	0	NaN	NaN	NaN	NaN	NaN	NaN	NaN	1	NaN	NaN	NaN	NaN	NaN	NaN	NaN	NaN	NaN	NaN	NaN	NaN	NaN	NaN	NaN	NaN	#	#	#	#	#
#	1	1	#	1	1	1	#	0	#	NaN	NaN	NaN	0	NaN	NaN	0	NaN	NaN	NaN	NaN	NaN	NaN	1	NaN	NaN	NaN	NaN	NaN	NaN	NaN	NaN	NaN	NaN	NaN	NaN	NaN	NaN	NaN	NaN	#	#	#	#	#
#	1	1	#	1	1	1	#	0	#	NaN	NaN	NaN	0	NaN	NaN	NaN	0	NaN	NaN	NaN	NaN	NaN	1	NaN	NaN	NaN	NaN	NaN	NaN	NaN	NaN	NaN	NaN	NaN	NaN	NaN	NaN	NaN	NaN	#	#	#	#	#
#	1	1	#	1	1	1	#	0	#	NaN	NaN	NaN	0	NaN	NaN	NaN	NaN	0	NaN	NaN	NaN	NaN	1	NaN	NaN	NaN	NaN	NaN	NaN	NaN	NaN	NaN	NaN	NaN	NaN	NaN	NaN	NaN	NaN	#	#	#	#	#
#	1	1	#	1	1	1	#	0	#	NaN	NaN	NaN	0	NaN	NaN	NaN	NaN	NaN	0	NaN	NaN	NaN	1	NaN	NaN	NaN	NaN	NaN	NaN	NaN	NaN	NaN	NaN	NaN	NaN	NaN	NaN	NaN	NaN	#	#	#	#	#
#	1	1	#	1	1	1	#	0	#	NaN	NaN	NaN	0	NaN	NaN	NaN	NaN	NaN	NaN	0	NaN	NaN	1	NaN	NaN	NaN	NaN	NaN	NaN	NaN	NaN	NaN	NaN	NaN	NaN	NaN	NaN	NaN	NaN	#	#	#	#	#
#	1	1	#	1	1	1	#	0	#	NaN	NaN	NaN	0	NaN	NaN	NaN	NaN	NaN	NaN	NaN	1	NaN	1	NaN	NaN	NaN	NaN	NaN	NaN	NaN	NaN	NaN	NaN	NaN	NaN	NaN	NaN	NaN	NaN	#	#	#	#	#
#	1	1	#	1	1	1	#	0	#	NaN	NaN	NaN	0	NaN	NaN	NaN	NaN	NaN	NaN	NaN	NaN	0	1	NaN	NaN	NaN	NaN	NaN	NaN	NaN	NaN	NaN	NaN	NaN	NaN	NaN	NaN	NaN	NaN	#	#	#	#	#
#	1	1	#	1	1	1	#	0	#	NaN	NaN	NaN	0	NaN	NaN	NaN	NaN	NaN	NaN	NaN	NaN	NaN	0	NaN	NaN	NaN	NaN	NaN	NaN	NaN	NaN	NaN	NaN	NaN	NaN	NaN	NaN	NaN	NaN	#	#	#	#	#
#	1	1	#	1	1	1	#	0	#	NaN	NaN	NaN	0	NaN	NaN	NaN	NaN	NaN	NaN	NaN	NaN	NaN	1	1	NaN	NaN	NaN	NaN	NaN	NaN	NaN	NaN	NaN	NaN	NaN	NaN	NaN	NaN	NaN	#	#	#	#	#
#	1	1	#	1	1	1	#	0	#	NaN	NaN	NaN	0	NaN	NaN	NaN	NaN	NaN	NaN	NaN	NaN	NaN	1	NaN	NaN	NaN	NaN	NaN	NaN	NaN	NaN	NaN	NaN	NaN	NaN	NaN	NaN	NaN	NaN	#	#	#	#	#
#	1	1	#	1	1	1	#	0	#	NaN	NaN	NaN	0	NaN	NaN	NaN	NaN	NaN	NaN	NaN	NaN	NaN	1	NaN	NaN	0	NaN	NaN	NaN	NaN	NaN	NaN	NaN	NaN	NaN	NaN	NaN	NaN	NaN	#	#	#	#	#
#	1	1	#	1	1	1	#	0	#	NaN	NaN	NaN	0	NaN	NaN	NaN	NaN	NaN	NaN	NaN	NaN	NaN	1	NaN	NaN	NaN	0	NaN	NaN	NaN	NaN	NaN	NaN	NaN	NaN	NaN	NaN	NaN	NaN	#	#	#	#	#
#	1	1	#	1	1	1	#	0	#	NaN	NaN	NaN	0	NaN	NaN	NaN	NaN	NaN	NaN	NaN	NaN	NaN	1	NaN	NaN	NaN	NaN	0	NaN	NaN	NaN	NaN	NaN	NaN	NaN	NaN	NaN	NaN	NaN	#	#	#	#	#
#	1	1	#	1	1	1	#	0	#	NaN	NaN	NaN	0	NaN	NaN	NaN	NaN	NaN	NaN	NaN	NaN	NaN	1	NaN	NaN	NaN	NaN	NaN	1	NaN	NaN	NaN	NaN	NaN	NaN	NaN	NaN	NaN	NaN	#	#	#	#	#
#	1	1	#	1	1	1	#	0	#	NaN	NaN	NaN	0	NaN	NaN	NaN	NaN	NaN	NaN	NaN	NaN	NaN	1	NaN	NaN	NaN	NaN	NaN	NaN	0	NaN	NaN	NaN	NaN	NaN	NaN	NaN	NaN	NaN	#	#	#	#	#
#	1	1	#	1	1	1	#	0	#	NaN	NaN	NaN	0	NaN	NaN	NaN	NaN	NaN	NaN	NaN	NaN	NaN	1	NaN	NaN	NaN	NaN	NaN	NaN	NaN	0	NaN	NaN	NaN	NaN	NaN	NaN	NaN	NaN	#	#	#	#	#
#	1	1	#	1	1	1	#	0	#	NaN	NaN	NaN	0	NaN	NaN	NaN	NaN	NaN	NaN	NaN	NaN	NaN	1	NaN	NaN	NaN	NaN	NaN	NaN	NaN	NaN	0	NaN	NaN	NaN	NaN	NaN	NaN	NaN	#	#	#	#	#
#	1	1	#	1	1	1	#	0	#	NaN	NaN	NaN	0	NaN	NaN	NaN	NaN	NaN	NaN	NaN	NaN	NaN	1	NaN	NaN	NaN	NaN	NaN	NaN	NaN	NaN	NaN	0	NaN	NaN	NaN	NaN	NaN	NaN	#	#	#	#	#
#	1	1	#	1	1	1	#	0	#	NaN	NaN	NaN	0	NaN	NaN	NaN	NaN	NaN	NaN	NaN	NaN	NaN	1	NaN	NaN	NaN	NaN	NaN	NaN	NaN	NaN	NaN	NaN	1	NaN	NaN	NaN	NaN	NaN	#	#	#	#	#
#	1	1	#	1	1	1	#	0	#	NaN	NaN	NaN	0	NaN	NaN	NaN	NaN	NaN	NaN	NaN	NaN	NaN	1	NaN	NaN	NaN	NaN	NaN	NaN	NaN	NaN	NaN	NaN	NaN	1	NaN	NaN	NaN	NaN	#	#	#	#	#
#	1	1	#	1	1	1	#	0	#	NaN	NaN	NaN	0	NaN	NaN	NaN	NaN	NaN	NaN	NaN	NaN	NaN	1	NaN	NaN	NaN	NaN	NaN	NaN	NaN	NaN	NaN	NaN	NaN	NaN	0	NaN	NaN	NaN	#	#	#	#	#
#	1	1	#	1	1	1	#	0	#	NaN	NaN	NaN	0	NaN	NaN	NaN	NaN	NaN	NaN	NaN	NaN	NaN	1	NaN	NaN	NaN	NaN	NaN	NaN	NaN	NaN	NaN	NaN	NaN	NaN	NaN	0	NaN	NaN	#	#	#	#	#
#	1	1	#	1	1	1	#	0	#	NaN	NaN	NaN	0	NaN	NaN	NaN	NaN	NaN	NaN	NaN	NaN	NaN	1	NaN	NaN	NaN	NaN	NaN	NaN	NaN	NaN	NaN	NaN	NaN	NaN	NaN	NaN	0	NaN	#	#	#	#	#
#	1	1	#	1	1	1	#	0	#	NaN	NaN	NaN	0	NaN	NaN	NaN	NaN	NaN	NaN	NaN	NaN	NaN	1	NaN	NaN	NaN	NaN	NaN	NaN	NaN	NaN	NaN	NaN	NaN	NaN	NaN	NaN	NaN	1	#	#	#	#	#
#	1	1	#	1	1	1	#	0	#	NaN	NaN	NaN	NaN	0	0	NaN	NaN	NaN	NaN	NaN	NaN	NaN	1	NaN	NaN	NaN	NaN	NaN	NaN	NaN	NaN	NaN	NaN	NaN	NaN	NaN	NaN	NaN	NaN	#	#	#	#	#
#	1	1	#	1	1	1	#	0	#	NaN	NaN	NaN	NaN	0	NaN	0	NaN	NaN	NaN	NaN	NaN	NaN	1	NaN	NaN	NaN	NaN	NaN	NaN	NaN	NaN	NaN	NaN	NaN	NaN	NaN	NaN	NaN	NaN	#	#	#	#	#
#	1	1	#	1	1	1	#	0	#	NaN	NaN	NaN	NaN	0	NaN	NaN	0	NaN	NaN	NaN	NaN	NaN	1	NaN	NaN	NaN	NaN	NaN	NaN	NaN	NaN	NaN	NaN	NaN	NaN	NaN	NaN	NaN	NaN	#	#	#	#	#
#	1	1	#	1	1	1	#	0	#	NaN	NaN	NaN	NaN	0	NaN	NaN	NaN	0	NaN	NaN	NaN	NaN	1	NaN	NaN	NaN	NaN	NaN	NaN	NaN	NaN	NaN	NaN	NaN	NaN	NaN	NaN	NaN	NaN	#	#	#	#	#
#	1	1	#	1	1	1	#	0	#	NaN	NaN	NaN	NaN	0	NaN	NaN	NaN	NaN	0	NaN	NaN	NaN	1	NaN	NaN	NaN	NaN	NaN	NaN	NaN	NaN	NaN	NaN	NaN	NaN	NaN	NaN	NaN	NaN	#	#	#	#	#
#	1	1	#	1	1	1	#	0	#	NaN	NaN	NaN	NaN	0	NaN	NaN	NaN	NaN	NaN	0	NaN	NaN	1	NaN	NaN	NaN	NaN	NaN	NaN	NaN	NaN	NaN	NaN	NaN	NaN	NaN	NaN	NaN	NaN	#	#	#	#	#
#	1	1	#	1	1	1	#	0	#	NaN	NaN	NaN	NaN	0	NaN	NaN	NaN	NaN	NaN	NaN	1	NaN	1	NaN	NaN	NaN	NaN	NaN	NaN	NaN	NaN	NaN	NaN	NaN	NaN	NaN	NaN	NaN	NaN	#	#	#	#	#
#	1	1	#	1	1	1	#	0	#	NaN	NaN	NaN	NaN	0	NaN	NaN	NaN	NaN	NaN	NaN	NaN	0	1	NaN	NaN	NaN	NaN	NaN	NaN	NaN	NaN	NaN	NaN	NaN	NaN	NaN	NaN	NaN	NaN	#	#	#	#	#
#	1	1	#	1	1	1	#	0	#	NaN	NaN	NaN	NaN	0	NaN	NaN	NaN	NaN	NaN	NaN	NaN	NaN	0	NaN	NaN	NaN	NaN	NaN	NaN	NaN	NaN	NaN	NaN	NaN	NaN	NaN	NaN	NaN	NaN	#	#	#	#	#
#	1	1	#	1	1	1	#	0	#	NaN	NaN	NaN	NaN	0	NaN	NaN	NaN	NaN	NaN	NaN	NaN	NaN	1	1	NaN	NaN	NaN	NaN	NaN	NaN	NaN	NaN	NaN	NaN	NaN	NaN	NaN	NaN	NaN	#	#	#	#	#
#	1	1	#	1	1	1	#	0	#	NaN	NaN	NaN	NaN	0	NaN	NaN	NaN	NaN	NaN	NaN	NaN	NaN	1	NaN	NaN	NaN	NaN	NaN	NaN	NaN	NaN	NaN	NaN	NaN	NaN	NaN	NaN	NaN	NaN	#	#	#	#	#
#	1	1	#	1	1	1	#	0	#	NaN	NaN	NaN	NaN	0	NaN	NaN	NaN	NaN	NaN	NaN	NaN	NaN	1	NaN	NaN	0	NaN	NaN	NaN	NaN	NaN	NaN	NaN	NaN	NaN	NaN	NaN	NaN	NaN	#	#	#	#	#
#	1	1	#	1	1	1	#	0	#	NaN	NaN	NaN	NaN	0	NaN	NaN	NaN	NaN	NaN	NaN	NaN	NaN	1	NaN	NaN	NaN	0	NaN	NaN	NaN	NaN	NaN	NaN	NaN	NaN	NaN	NaN	NaN	NaN	#	#	#	#	#
#	1	1	#	1	1	1	#	0	#	NaN	NaN	NaN	NaN	0	NaN	NaN	NaN	NaN	NaN	NaN	NaN	NaN	1	NaN	NaN	NaN	NaN	0	NaN	NaN	NaN	NaN	NaN	NaN	NaN	NaN	NaN	NaN	NaN	#	#	#	#	#
#	1	1	#	1	1	1	#	0	#	NaN	NaN	NaN	NaN	0	NaN	NaN	NaN	NaN	NaN	NaN	NaN	NaN	1	NaN	NaN	NaN	NaN	NaN	1	NaN	NaN	NaN	NaN	NaN	NaN	NaN	NaN	NaN	NaN	#	#	#	#	#
#	1	1	#	1	1	1	#	0	#	NaN	NaN	NaN	NaN	0	NaN	NaN	NaN	NaN	NaN	NaN	NaN	NaN	1	NaN	NaN	NaN	NaN	NaN	NaN	0	NaN	NaN	NaN	NaN	NaN	NaN	NaN	NaN	NaN	#	#	#	#	#
#	1	1	#	1	1	1	#	0	#	NaN	NaN	NaN	NaN	0	NaN	NaN	NaN	NaN	NaN	NaN	NaN	NaN	1	NaN	NaN	NaN	NaN	NaN	NaN	NaN	0	NaN	NaN	NaN	NaN	NaN	NaN	NaN	NaN	#	#	#	#	#
#	1	1	#	1	1	1	#	0	#	NaN	NaN	NaN	NaN	0	NaN	NaN	NaN	NaN	NaN	NaN	NaN	NaN	1	NaN	NaN	NaN	NaN	NaN	NaN	NaN	NaN	0	NaN	NaN	NaN	NaN	NaN	NaN	NaN	#	#	#	#	#
#	1	1	#	1	1	1	#	0	#	NaN	NaN	NaN	NaN	0	NaN	NaN	NaN	NaN	NaN	NaN	NaN	NaN	1	NaN	NaN	NaN	NaN	NaN	NaN	NaN	NaN	NaN	0	NaN	NaN	NaN	NaN	NaN	NaN	#	#	#	#	#
#	1	1	#	1	1	1	#	0	#	NaN	NaN	NaN	NaN	0	NaN	NaN	NaN	NaN	NaN	NaN	NaN	NaN	1	NaN	NaN	NaN	NaN	NaN	NaN	NaN	NaN	NaN	NaN	1	NaN	NaN	NaN	NaN	NaN	#	#	#	#	#
#	1	1	#	1	1	1	#	0	#	NaN	NaN	NaN	NaN	0	NaN	NaN	NaN	NaN	NaN	NaN	NaN	NaN	1	NaN	NaN	NaN	NaN	NaN	NaN	NaN	NaN	NaN	NaN	NaN	1	NaN	NaN	NaN	NaN	#	#	#	#	#
#	1	1	#	1	1	1	#	0	#	NaN	NaN	NaN	NaN	0	NaN	NaN	NaN	NaN	NaN	NaN	NaN	NaN	1	NaN	NaN	NaN	NaN	NaN	NaN	NaN	NaN	NaN	NaN	NaN	NaN	0	NaN	NaN	NaN	#	#	#	#	#
#	1	1	#	1	1	1	#	0	#	NaN	NaN	NaN	NaN	0	NaN	NaN	NaN	NaN	NaN	NaN	NaN	NaN	1	NaN	NaN	NaN	NaN	NaN	NaN	NaN	NaN	NaN	NaN	NaN	NaN	NaN	0	NaN	NaN	#	#	#	#	#
#	1	1	#	1	1	1	#	0	#	NaN	NaN	NaN	NaN	0	NaN	NaN	NaN	NaN	NaN	NaN	NaN	NaN	1	NaN	NaN	NaN	NaN	NaN	NaN	NaN	NaN	NaN	NaN	NaN	NaN	NaN	NaN	0	NaN	#	#	#	#	#
#	1	1	#	1	1	1	#	0	#	NaN	NaN	NaN	NaN	0	NaN	NaN	NaN	NaN	NaN	NaN	NaN	NaN	1	NaN	NaN	NaN	NaN	NaN	NaN	NaN	NaN	NaN	NaN	NaN	NaN	NaN	NaN	NaN	1	#	#	#	#	#
#	1	1	#	1	1	1	#	0	#	NaN	NaN	NaN	NaN	NaN	0	0	NaN	NaN	NaN	NaN	NaN	NaN	1	NaN	NaN	NaN	NaN	NaN	NaN	NaN	NaN	NaN	NaN	NaN	NaN	NaN	NaN	NaN	NaN	#	#	#	#	#
#	1	1	#	1	1	1	#	0	#	NaN	NaN	NaN	NaN	NaN	0	NaN	0	NaN	NaN	NaN	NaN	NaN	1	NaN	NaN	NaN	NaN	NaN	NaN	NaN	NaN	NaN	NaN	NaN	NaN	NaN	NaN	NaN	NaN	#	#	#	#	#
#	1	1	#	1	1	1	#	0	#	NaN	NaN	NaN	NaN	NaN	0	NaN	NaN	0	NaN	NaN	NaN	NaN	1	NaN	NaN	NaN	NaN	NaN	NaN	NaN	NaN	NaN	NaN	NaN	NaN	NaN	NaN	NaN	NaN	#	#	#	#	#
#	1	1	#	1	1	1	#	0	#	NaN	NaN	NaN	NaN	NaN	0	NaN	NaN	NaN	0	NaN	NaN	NaN	1	NaN	NaN	NaN	NaN	NaN	NaN	NaN	NaN	NaN	NaN	NaN	NaN	NaN	NaN	NaN	NaN	#	#	#	#	#
#	1	1	#	1	1	1	#	0	#	NaN	NaN	NaN	NaN	NaN	0	NaN	NaN	NaN	NaN	0	NaN	NaN	1	NaN	NaN	NaN	NaN	NaN	NaN	NaN	NaN	NaN	NaN	NaN	NaN	NaN	NaN	NaN	NaN	#	#	#	#	#
#	1	1	#	1	1	1	#	0	#	NaN	NaN	NaN	NaN	NaN	0	NaN	NaN	NaN	NaN	NaN	1	NaN	1	NaN	NaN	NaN	NaN	NaN	NaN	NaN	NaN	NaN	NaN	NaN	NaN	NaN	NaN	NaN	NaN	#	#	#	#	#
#	1	1	#	1	1	1	#	0	#	NaN	NaN	NaN	NaN	NaN	0	NaN	NaN	NaN	NaN	NaN	NaN	0	1	NaN	NaN	NaN	NaN	NaN	NaN	NaN	NaN	NaN	NaN	NaN	NaN	NaN	NaN	NaN	NaN	#	#	#	#	#
#	1	1	#	1	1	1	#	0	#	NaN	NaN	NaN	NaN	NaN	0	NaN	NaN	NaN	NaN	NaN	NaN	NaN	0	NaN	NaN	NaN	NaN	NaN	NaN	NaN	NaN	NaN	NaN	NaN	NaN	NaN	NaN	NaN	NaN	#	#	#	#	#
#	1	1	#	1	1	1	#	0	#	NaN	NaN	NaN	NaN	NaN	0	NaN	NaN	NaN	NaN	NaN	NaN	NaN	1	1	NaN	NaN	NaN	NaN	NaN	NaN	NaN	NaN	NaN	NaN	NaN	NaN	NaN	NaN	NaN	#	#	#	#	#
#	1	1	#	1	1	1	#	0	#	NaN	NaN	NaN	NaN	NaN	0	NaN	NaN	NaN	NaN	NaN	NaN	NaN	1	NaN	NaN	NaN	NaN	NaN	NaN	NaN	NaN	NaN	NaN	NaN	NaN	NaN	NaN	NaN	NaN	#	#	#	#	#
#	1	1	#	1	1	1	#	0	#	NaN	NaN	NaN	NaN	NaN	0	NaN	NaN	NaN	NaN	NaN	NaN	NaN	1	NaN	NaN	0	NaN	NaN	NaN	NaN	NaN	NaN	NaN	NaN	NaN	NaN	NaN	NaN	NaN	#	#	#	#	#
#	1	1	#	1	1	1	#	0	#	NaN	NaN	NaN	NaN	NaN	0	NaN	NaN	NaN	NaN	NaN	NaN	NaN	1	NaN	NaN	NaN	0	NaN	NaN	NaN	NaN	NaN	NaN	NaN	NaN	NaN	NaN	NaN	NaN	#	#	#	#	#
#	1	1	#	1	1	1	#	0	#	NaN	NaN	NaN	NaN	NaN	0	NaN	NaN	NaN	NaN	NaN	NaN	NaN	1	NaN	NaN	NaN	NaN	0	NaN	NaN	NaN	NaN	NaN	NaN	NaN	NaN	NaN	NaN	NaN	#	#	#	#	#
#	1	1	#	1	1	1	#	0	#	NaN	NaN	NaN	NaN	NaN	0	NaN	NaN	NaN	NaN	NaN	NaN	NaN	1	NaN	NaN	NaN	NaN	NaN	1	NaN	NaN	NaN	NaN	NaN	NaN	NaN	NaN	NaN	NaN	#	#	#	#	#
#	1	1	#	1	1	1	#	0	#	NaN	NaN	NaN	NaN	NaN	0	NaN	NaN	NaN	NaN	NaN	NaN	NaN	1	NaN	NaN	NaN	NaN	NaN	NaN	0	NaN	NaN	NaN	NaN	NaN	NaN	NaN	NaN	NaN	#	#	#	#	#
#	1	1	#	1	1	1	#	0	#	NaN	NaN	NaN	NaN	NaN	0	NaN	NaN	NaN	NaN	NaN	NaN	NaN	1	NaN	NaN	NaN	NaN	NaN	NaN	NaN	0	NaN	NaN	NaN	NaN	NaN	NaN	NaN	NaN	#	#	#	#	#
#	1	1	#	1	1	1	#	0	#	NaN	NaN	NaN	NaN	NaN	0	NaN	NaN	NaN	NaN	NaN	NaN	NaN	1	NaN	NaN	NaN	NaN	NaN	NaN	NaN	NaN	0	NaN	NaN	NaN	NaN	NaN	NaN	NaN	#	#	#	#	#
#	1	1	#	1	1	1	#	0	#	NaN	NaN	NaN	NaN	NaN	0	NaN	NaN	NaN	NaN	NaN	NaN	NaN	1	NaN	NaN	NaN	NaN	NaN	NaN	NaN	NaN	NaN	0	NaN	NaN	NaN	NaN	NaN	NaN	#	#	#	#	#
#	1	1	#	1	1	1	#	0	#	NaN	NaN	NaN	NaN	NaN	0	NaN	NaN	NaN	NaN	NaN	NaN	NaN	1	NaN	NaN	NaN	NaN	NaN	NaN	NaN	NaN	NaN	NaN	1	NaN	NaN	NaN	NaN	NaN	#	#	#	#	#
#	1	1	#	1	1	1	#	0	#	NaN	NaN	NaN	NaN	NaN	0	NaN	NaN	NaN	NaN	NaN	NaN	NaN	1	NaN	NaN	NaN	NaN	NaN	NaN	NaN	NaN	NaN	NaN	NaN	1	NaN	NaN	NaN	NaN	#	#	#	#	#
#	1	1	#	1	1	1	#	0	#	NaN	NaN	NaN	NaN	NaN	0	NaN	NaN	NaN	NaN	NaN	NaN	NaN	1	NaN	NaN	NaN	NaN	NaN	NaN	NaN	NaN	NaN	NaN	NaN	NaN	0	NaN	NaN	NaN	#	#	#	#	#
#	1	1	#	1	1	1	#	0	#	NaN	NaN	NaN	NaN	NaN	0	NaN	NaN	NaN	NaN	NaN	NaN	NaN	1	NaN	NaN	NaN	NaN	NaN	NaN	NaN	NaN	NaN	NaN	NaN	NaN	NaN	0	NaN	NaN	#	#	#	#	#
#	1	1	#	1	1	1	#	0	#	NaN	NaN	NaN	NaN	NaN	0	NaN	NaN	NaN	NaN	NaN	NaN	NaN	1	NaN	NaN	NaN	NaN	NaN	NaN	NaN	NaN	NaN	NaN	NaN	NaN	NaN	NaN	0	NaN	#	#	#	#	#
#	1	1	#	1	1	1	#	0	#	NaN	NaN	NaN	NaN	NaN	0	NaN	NaN	NaN	NaN	NaN	NaN	NaN	1	NaN	NaN	NaN	NaN	NaN	NaN	NaN	NaN	NaN	NaN	NaN	NaN	NaN	NaN	NaN	1	#	#	#	#	#
#	1	1	#	1	1	1	#	0	#	NaN	NaN	NaN	NaN	NaN	NaN	0	0	NaN	NaN	NaN	NaN	NaN	1	NaN	NaN	NaN	NaN	NaN	NaN	NaN	NaN	NaN	NaN	NaN	NaN	NaN	NaN	NaN	NaN	#	#	#	#	#
#	1	1	#	1	1	1	#	0	#	NaN	NaN	NaN	NaN	NaN	NaN	0	NaN	0	NaN	NaN	NaN	NaN	1	NaN	NaN	NaN	NaN	NaN	NaN	NaN	NaN	NaN	NaN	NaN	NaN	NaN	NaN	NaN	NaN	#	#	#	#	#
#	1	1	#	1	1	1	#	0	#	NaN	NaN	NaN	NaN	NaN	NaN	0	NaN	NaN	0	NaN	NaN	NaN	1	NaN	NaN	NaN	NaN	NaN	NaN	NaN	NaN	NaN	NaN	NaN	NaN	NaN	NaN	NaN	NaN	#	#	#	#	#
#	1	1	#	1	1	1	#	0	#	NaN	NaN	NaN	NaN	NaN	NaN	0	NaN	NaN	NaN	0	NaN	NaN	1	NaN	NaN	NaN	NaN	NaN	NaN	NaN	NaN	NaN	NaN	NaN	NaN	NaN	NaN	NaN	NaN	#	#	#	#	#
#	1	1	#	1	1	1	#	0	#	NaN	NaN	NaN	NaN	NaN	NaN	0	NaN	NaN	NaN	NaN	1	NaN	1	NaN	NaN	NaN	NaN	NaN	NaN	NaN	NaN	NaN	NaN	NaN	NaN	NaN	NaN	NaN	NaN	#	#	#	#	#
#	1	1	#	1	1	1	#	0	#	NaN	NaN	NaN	NaN	NaN	NaN	0	NaN	NaN	NaN	NaN	NaN	0	1	NaN	NaN	NaN	NaN	NaN	NaN	NaN	NaN	NaN	NaN	NaN	NaN	NaN	NaN	NaN	NaN	#	#	#	#	#
#	1	1	#	1	1	1	#	0	#	NaN	NaN	NaN	NaN	NaN	NaN	0	NaN	NaN	NaN	NaN	NaN	NaN	0	NaN	NaN	NaN	NaN	NaN	NaN	NaN	NaN	NaN	NaN	NaN	NaN	NaN	NaN	NaN	NaN	#	#	#	#	#
#	1	1	#	1	1	1	#	0	#	NaN	NaN	NaN	NaN	NaN	NaN	0	NaN	NaN	NaN	NaN	NaN	NaN	1	1	NaN	NaN	NaN	NaN	NaN	NaN	NaN	NaN	NaN	NaN	NaN	NaN	NaN	NaN	NaN	#	#	#	#	#
#	1	1	#	1	1	1	#	0	#	NaN	NaN	NaN	NaN	NaN	NaN	0	NaN	NaN	NaN	NaN	NaN	NaN	1	NaN	NaN	NaN	NaN	NaN	NaN	NaN	NaN	NaN	NaN	NaN	NaN	NaN	NaN	NaN	NaN	#	#	#	#	#
#	1	1	#	1	1	1	#	0	#	NaN	NaN	NaN	NaN	NaN	NaN	0	NaN	NaN	NaN	NaN	NaN	NaN	1	NaN	NaN	0	NaN	NaN	NaN	NaN	NaN	NaN	NaN	NaN	NaN	NaN	NaN	NaN	NaN	#	#	#	#	#
#	1	1	#	1	1	1	#	0	#	NaN	NaN	NaN	NaN	NaN	NaN	0	NaN	NaN	NaN	NaN	NaN	NaN	1	NaN	NaN	NaN	0	NaN	NaN	NaN	NaN	NaN	NaN	NaN	NaN	NaN	NaN	NaN	NaN	#	#	#	#	#
#	1	1	#	1	1	1	#	0	#	NaN	NaN	NaN	NaN	NaN	NaN	0	NaN	NaN	NaN	NaN	NaN	NaN	1	NaN	NaN	NaN	NaN	0	NaN	NaN	NaN	NaN	NaN	NaN	NaN	NaN	NaN	NaN	NaN	#	#	#	#	#
#	1	1	#	1	1	1	#	0	#	NaN	NaN	NaN	NaN	NaN	NaN	0	NaN	NaN	NaN	NaN	NaN	NaN	1	NaN	NaN	NaN	NaN	NaN	1	NaN	NaN	NaN	NaN	NaN	NaN	NaN	NaN	NaN	NaN	#	#	#	#	#
#	1	1	#	1	1	1	#	0	#	NaN	NaN	NaN	NaN	NaN	NaN	0	NaN	NaN	NaN	NaN	NaN	NaN	1	NaN	NaN	NaN	NaN	NaN	NaN	0	NaN	NaN	NaN	NaN	NaN	NaN	NaN	NaN	NaN	#	#	#	#	#
#	1	1	#	1	1	1	#	0	#	NaN	NaN	NaN	NaN	NaN	NaN	0	NaN	NaN	NaN	NaN	NaN	NaN	1	NaN	NaN	NaN	NaN	NaN	NaN	NaN	0	NaN	NaN	NaN	NaN	NaN	NaN	NaN	NaN	#	#	#	#	#
#	1	1	#	1	1	1	#	0	#	NaN	NaN	NaN	NaN	NaN	NaN	0	NaN	NaN	NaN	NaN	NaN	NaN	1	NaN	NaN	NaN	NaN	NaN	NaN	NaN	NaN	0	NaN	NaN	NaN	NaN	NaN	NaN	NaN	#	#	#	#	#
#	1	1	#	1	1	1	#	0	#	NaN	NaN	NaN	NaN	NaN	NaN	0	NaN	NaN	NaN	NaN	NaN	NaN	1	NaN	NaN	NaN	NaN	NaN	NaN	NaN	NaN	NaN	0	NaN	NaN	NaN	NaN	NaN	NaN	#	#	#	#	#
#	1	1	#	1	1	1	#	0	#	NaN	NaN	NaN	NaN	NaN	NaN	0	NaN	NaN	NaN	NaN	NaN	NaN	1	NaN	NaN	NaN	NaN	NaN	NaN	NaN	NaN	NaN	NaN	1	NaN	NaN	NaN	NaN	NaN	#	#	#	#	#
#	1	1	#	1	1	1	#	0	#	NaN	NaN	NaN	NaN	NaN	NaN	0	NaN	NaN	NaN	NaN	NaN	NaN	1	NaN	NaN	NaN	NaN	NaN	NaN	NaN	NaN	NaN	NaN	NaN	1	NaN	NaN	NaN	NaN	#	#	#	#	#
#	1	1	#	1	1	1	#	0	#	NaN	NaN	NaN	NaN	NaN	NaN	0	NaN	NaN	NaN	NaN	NaN	NaN	1	NaN	NaN	NaN	NaN	NaN	NaN	NaN	NaN	NaN	NaN	NaN	NaN	0	NaN	NaN	NaN	#	#	#	#	#
#	1	1	#	1	1	1	#	0	#	NaN	NaN	NaN	NaN	NaN	NaN	0	NaN	NaN	NaN	NaN	NaN	NaN	1	NaN	NaN	NaN	NaN	NaN	NaN	NaN	NaN	NaN	NaN	NaN	NaN	NaN	0	NaN	NaN	#	#	#	#	#
#	1	1	#	1	1	1	#	0	#	NaN	NaN	NaN	NaN	NaN	NaN	0	NaN	NaN	NaN	NaN	NaN	NaN	1	NaN	NaN	NaN	NaN	NaN	NaN	NaN	NaN	NaN	NaN	NaN	NaN	NaN	NaN	0	NaN	#	#	#	#	#
#	1	1	#	1	1	1	#	0	#	NaN	NaN	NaN	NaN	NaN	NaN	0	NaN	NaN	NaN	NaN	NaN	NaN	1	NaN	NaN	NaN	NaN	NaN	NaN	NaN	NaN	NaN	NaN	NaN	NaN	NaN	NaN	NaN	1	#	#	#	#	#
#	1	1	#	1	1	1	#	0	#	NaN	NaN	NaN	NaN	NaN	NaN	NaN	0	0	NaN	NaN	NaN	NaN	1	NaN	NaN	NaN	NaN	NaN	NaN	NaN	NaN	NaN	NaN	NaN	NaN	NaN	NaN	NaN	NaN	#	#	#	#	#
#	1	1	#	1	1	1	#	0	#	NaN	NaN	NaN	NaN	NaN	NaN	NaN	0	NaN	0	NaN	NaN	NaN	1	NaN	NaN	NaN	NaN	NaN	NaN	NaN	NaN	NaN	NaN	NaN	NaN	NaN	NaN	NaN	NaN	#	#	#	#	#
#	1	1	#	1	1	1	#	0	#	NaN	NaN	NaN	NaN	NaN	NaN	NaN	0	NaN	NaN	0	NaN	NaN	1	NaN	NaN	NaN	NaN	NaN	NaN	NaN	NaN	NaN	NaN	NaN	NaN	NaN	NaN	NaN	NaN	#	#	#	#	#
#	1	1	#	1	1	1	#	0	#	NaN	NaN	NaN	NaN	NaN	NaN	NaN	0	NaN	NaN	NaN	1	NaN	1	NaN	NaN	NaN	NaN	NaN	NaN	NaN	NaN	NaN	NaN	NaN	NaN	NaN	NaN	NaN	NaN	#	#	#	#	#
#	1	1	#	1	1	1	#	0	#	NaN	NaN	NaN	NaN	NaN	NaN	NaN	0	NaN	NaN	NaN	NaN	0	1	NaN	NaN	NaN	NaN	NaN	NaN	NaN	NaN	NaN	NaN	NaN	NaN	NaN	NaN	NaN	NaN	#	#	#	#	#
#	1	1	#	1	1	1	#	0	#	NaN	NaN	NaN	NaN	NaN	NaN	NaN	0	NaN	NaN	NaN	NaN	NaN	0	NaN	NaN	NaN	NaN	NaN	NaN	NaN	NaN	NaN	NaN	NaN	NaN	NaN	NaN	NaN	NaN	#	#	#	#	#
#	1	1	#	1	1	1	#	0	#	NaN	NaN	NaN	NaN	NaN	NaN	NaN	0	NaN	NaN	NaN	NaN	NaN	1	1	NaN	NaN	NaN	NaN	NaN	NaN	NaN	NaN	NaN	NaN	NaN	NaN	NaN	NaN	NaN	#	#	#	#	#
#	1	1	#	1	1	1	#	0	#	NaN	NaN	NaN	NaN	NaN	NaN	NaN	0	NaN	NaN	NaN	NaN	NaN	1	NaN	NaN	NaN	NaN	NaN	NaN	NaN	NaN	NaN	NaN	NaN	NaN	NaN	NaN	NaN	NaN	#	#	#	#	#
#	1	1	#	1	1	1	#	0	#	NaN	NaN	NaN	NaN	NaN	NaN	NaN	0	NaN	NaN	NaN	NaN	NaN	1	NaN	NaN	0	NaN	NaN	NaN	NaN	NaN	NaN	NaN	NaN	NaN	NaN	NaN	NaN	NaN	#	#	#	#	#
#	1	1	#	1	1	1	#	0	#	NaN	NaN	NaN	NaN	NaN	NaN	NaN	0	NaN	NaN	NaN	NaN	NaN	1	NaN	NaN	NaN	0	NaN	NaN	NaN	NaN	NaN	NaN	NaN	NaN	NaN	NaN	NaN	NaN	#	#	#	#	#
#	1	1	#	1	1	1	#	0	#	NaN	NaN	NaN	NaN	NaN	NaN	NaN	0	NaN	NaN	NaN	NaN	NaN	1	NaN	NaN	NaN	NaN	0	NaN	NaN	NaN	NaN	NaN	NaN	NaN	NaN	NaN	NaN	NaN	#	#	#	#	#
#	1	1	#	1	1	1	#	0	#	NaN	NaN	NaN	NaN	NaN	NaN	NaN	0	NaN	NaN	NaN	NaN	NaN	1	NaN	NaN	NaN	NaN	NaN	1	NaN	NaN	NaN	NaN	NaN	NaN	NaN	NaN	NaN	NaN	#	#	#	#	#
#	1	1	#	1	1	1	#	0	#	NaN	NaN	NaN	NaN	NaN	NaN	NaN	0	NaN	NaN	NaN	NaN	NaN	1	NaN	NaN	NaN	NaN	NaN	NaN	0	NaN	NaN	NaN	NaN	NaN	NaN	NaN	NaN	NaN	#	#	#	#	#
#	1	1	#	1	1	1	#	0	#	NaN	NaN	NaN	NaN	NaN	NaN	NaN	0	NaN	NaN	NaN	NaN	NaN	1	NaN	NaN	NaN	NaN	NaN	NaN	NaN	0	NaN	NaN	NaN	NaN	NaN	NaN	NaN	NaN	#	#	#	#	#
#	1	1	#	1	1	1	#	0	#	NaN	NaN	NaN	NaN	NaN	NaN	NaN	0	NaN	NaN	NaN	NaN	NaN	1	NaN	NaN	NaN	NaN	NaN	NaN	NaN	NaN	0	NaN	NaN	NaN	NaN	NaN	NaN	NaN	#	#	#	#	#
#	1	1	#	1	1	1	#	0	#	NaN	NaN	NaN	NaN	NaN	NaN	NaN	0	NaN	NaN	NaN	NaN	NaN	1	NaN	NaN	NaN	NaN	NaN	NaN	NaN	NaN	NaN	0	NaN	NaN	NaN	NaN	NaN	NaN	#	#	#	#	#
#	1	1	#	1	1	1	#	0	#	NaN	NaN	NaN	NaN	NaN	NaN	NaN	0	NaN	NaN	NaN	NaN	NaN	1	NaN	NaN	NaN	NaN	NaN	NaN	NaN	NaN	NaN	NaN	1	NaN	NaN	NaN	NaN	NaN	#	#	#	#	#
#	1	1	#	1	1	1	#	0	#	NaN	NaN	NaN	NaN	NaN	NaN	NaN	0	NaN	NaN	NaN	NaN	NaN	1	NaN	NaN	NaN	NaN	NaN	NaN	NaN	NaN	NaN	NaN	NaN	1	NaN	NaN	NaN	NaN	#	#	#	#	#
#	1	1	#	1	1	1	#	0	#	NaN	NaN	NaN	NaN	NaN	NaN	NaN	0	NaN	NaN	NaN	NaN	NaN	1	NaN	NaN	NaN	NaN	NaN	NaN	NaN	NaN	NaN	NaN	NaN	NaN	0	NaN	NaN	NaN	#	#	#	#	#
#	1	1	#	1	1	1	#	0	#	NaN	NaN	NaN	NaN	NaN	NaN	NaN	0	NaN	NaN	NaN	NaN	NaN	1	NaN	NaN	NaN	NaN	NaN	NaN	NaN	NaN	NaN	NaN	NaN	NaN	NaN	0	NaN	NaN	#	#	#	#	#
#	1	1	#	1	1	1	#	0	#	NaN	NaN	NaN	NaN	NaN	NaN	NaN	0	NaN	NaN	NaN	NaN	NaN	1	NaN	NaN	NaN	NaN	NaN	NaN	NaN	NaN	NaN	NaN	NaN	NaN	NaN	NaN	0	NaN	#	#	#	#	#
#	1	1	#	1	1	1	#	0	#	NaN	NaN	NaN	NaN	NaN	NaN	NaN	0	NaN	NaN	NaN	NaN	NaN	1	NaN	NaN	NaN	NaN	NaN	NaN	NaN	NaN	NaN	NaN	NaN	NaN	NaN	NaN	NaN	1	#	#	#	#	#
#	1	1	#	1	1	1	#	0	#	NaN	NaN	NaN	NaN	NaN	NaN	NaN	NaN	0	0	NaN	NaN	NaN	1	NaN	NaN	NaN	NaN	NaN	NaN	NaN	NaN	NaN	NaN	NaN	NaN	NaN	NaN	NaN	NaN	#	#	#	#	#
#	1	1	#	1	1	1	#	0	#	NaN	NaN	NaN	NaN	NaN	NaN	NaN	NaN	0	NaN	0	NaN	NaN	1	NaN	NaN	NaN	NaN	NaN	NaN	NaN	NaN	NaN	NaN	NaN	NaN	NaN	NaN	NaN	NaN	#	#	#	#	#
#	1	1	#	1	1	1	#	0	#	NaN	NaN	NaN	NaN	NaN	NaN	NaN	NaN	0	NaN	NaN	1	NaN	1	NaN	NaN	NaN	NaN	NaN	NaN	NaN	NaN	NaN	NaN	NaN	NaN	NaN	NaN	NaN	NaN	#	#	#	#	#
#	1	1	#	1	1	1	#	0	#	NaN	NaN	NaN	NaN	NaN	NaN	NaN	NaN	0	NaN	NaN	NaN	0	1	NaN	NaN	NaN	NaN	NaN	NaN	NaN	NaN	NaN	NaN	NaN	NaN	NaN	NaN	NaN	NaN	#	#	#	#	#
#	1	1	#	1	1	1	#	0	#	NaN	NaN	NaN	NaN	NaN	NaN	NaN	NaN	0	NaN	NaN	NaN	NaN	0	NaN	NaN	NaN	NaN	NaN	NaN	NaN	NaN	NaN	NaN	NaN	NaN	NaN	NaN	NaN	NaN	#	#	#	#	#
#	1	1	#	1	1	1	#	0	#	NaN	NaN	NaN	NaN	NaN	NaN	NaN	NaN	0	NaN	NaN	NaN	NaN	1	1	NaN	NaN	NaN	NaN	NaN	NaN	NaN	NaN	NaN	NaN	NaN	NaN	NaN	NaN	NaN	#	#	#	#	#
#	1	1	#	1	1	1	#	0	#	NaN	NaN	NaN	NaN	NaN	NaN	NaN	NaN	0	NaN	NaN	NaN	NaN	1	NaN	NaN	NaN	NaN	NaN	NaN	NaN	NaN	NaN	NaN	NaN	NaN	NaN	NaN	NaN	NaN	#	#	#	#	#
#	1	1	#	1	1	1	#	0	#	NaN	NaN	NaN	NaN	NaN	NaN	NaN	NaN	0	NaN	NaN	NaN	NaN	1	NaN	NaN	0	NaN	NaN	NaN	NaN	NaN	NaN	NaN	NaN	NaN	NaN	NaN	NaN	NaN	#	#	#	#	#
#	1	1	#	1	1	1	#	0	#	NaN	NaN	NaN	NaN	NaN	NaN	NaN	NaN	0	NaN	NaN	NaN	NaN	1	NaN	NaN	NaN	0	NaN	NaN	NaN	NaN	NaN	NaN	NaN	NaN	NaN	NaN	NaN	NaN	#	#	#	#	#
#	1	1	#	1	1	1	#	0	#	NaN	NaN	NaN	NaN	NaN	NaN	NaN	NaN	0	NaN	NaN	NaN	NaN	1	NaN	NaN	NaN	NaN	0	NaN	NaN	NaN	NaN	NaN	NaN	NaN	NaN	NaN	NaN	NaN	#	#	#	#	#
#	1	1	#	1	1	1	#	0	#	NaN	NaN	NaN	NaN	NaN	NaN	NaN	NaN	0	NaN	NaN	NaN	NaN	1	NaN	NaN	NaN	NaN	NaN	1	NaN	NaN	NaN	NaN	NaN	NaN	NaN	NaN	NaN	NaN	#	#	#	#	#
#	1	1	#	1	1	1	#	0	#	NaN	NaN	NaN	NaN	NaN	NaN	NaN	NaN	0	NaN	NaN	NaN	NaN	1	NaN	NaN	NaN	NaN	NaN	NaN	0	NaN	NaN	NaN	NaN	NaN	NaN	NaN	NaN	NaN	#	#	#	#	#
#	1	1	#	1	1	1	#	0	#	NaN	NaN	NaN	NaN	NaN	NaN	NaN	NaN	0	NaN	NaN	NaN	NaN	1	NaN	NaN	NaN	NaN	NaN	NaN	NaN	0	NaN	NaN	NaN	NaN	NaN	NaN	NaN	NaN	#	#	#	#	#
#	1	1	#	1	1	1	#	0	#	NaN	NaN	NaN	NaN	NaN	NaN	NaN	NaN	0	NaN	NaN	NaN	NaN	1	NaN	NaN	NaN	NaN	NaN	NaN	NaN	NaN	0	NaN	NaN	NaN	NaN	NaN	NaN	NaN	#	#	#	#	#
#	1	1	#	1	1	1	#	0	#	NaN	NaN	NaN	NaN	NaN	NaN	NaN	NaN	0	NaN	NaN	NaN	NaN	1	NaN	NaN	NaN	NaN	NaN	NaN	NaN	NaN	NaN	0	NaN	NaN	NaN	NaN	NaN	NaN	#	#	#	#	#
#	1	1	#	1	1	1	#	0	#	NaN	NaN	NaN	NaN	NaN	NaN	NaN	NaN	0	NaN	NaN	NaN	NaN	1	NaN	NaN	NaN	NaN	NaN	NaN	NaN	NaN	NaN	NaN	1	NaN	NaN	NaN	NaN	NaN	#	#	#	#	#
#	1	1	#	1	1	1	#	0	#	NaN	NaN	NaN	NaN	NaN	NaN	NaN	NaN	0	NaN	NaN	NaN	NaN	1	NaN	NaN	NaN	NaN	NaN	NaN	NaN	NaN	NaN	NaN	NaN	1	NaN	NaN	NaN	NaN	#	#	#	#	#
#	1	1	#	1	1	1	#	0	#	NaN	NaN	NaN	NaN	NaN	NaN	NaN	NaN	0	NaN	NaN	NaN	NaN	1	NaN	NaN	NaN	NaN	NaN	NaN	NaN	NaN	NaN	NaN	NaN	NaN	0	NaN	NaN	NaN	#	#	#	#	#
#	1	1	#	1	1	1	#	0	#	NaN	NaN	NaN	NaN	NaN	NaN	NaN	NaN	0	NaN	NaN	NaN	NaN	1	NaN	NaN	NaN	NaN	NaN	NaN	NaN	NaN	NaN	NaN	NaN	NaN	NaN	0	NaN	NaN	#	#	#	#	#
#	1	1	#	1	1	1	#	0	#	NaN	NaN	NaN	NaN	NaN	NaN	NaN	NaN	0	NaN	NaN	NaN	NaN	1	NaN	NaN	NaN	NaN	NaN	NaN	NaN	NaN	NaN	NaN	NaN	NaN	NaN	NaN	0	NaN	#	#	#	#	#
#	1	1	#	1	1	1	#	0	#	NaN	NaN	NaN	NaN	NaN	NaN	NaN	NaN	0	NaN	NaN	NaN	NaN	1	NaN	NaN	NaN	NaN	NaN	NaN	NaN	NaN	NaN	NaN	NaN	NaN	NaN	NaN	NaN	1	#	#	#	#	#
#	1	1	#	1	1	1	#	0	#	NaN	NaN	NaN	NaN	NaN	NaN	NaN	NaN	NaN	0	0	NaN	NaN	1	NaN	NaN	NaN	NaN	NaN	NaN	NaN	NaN	NaN	NaN	NaN	NaN	NaN	NaN	NaN	NaN	#	#	#	#	#
#	1	1	#	1	1	1	#	0	#	NaN	NaN	NaN	NaN	NaN	NaN	NaN	NaN	NaN	0	NaN	1	NaN	1	NaN	NaN	NaN	NaN	NaN	NaN	NaN	NaN	NaN	NaN	NaN	NaN	NaN	NaN	NaN	NaN	#	#	#	#	#
#	1	1	#	1	1	1	#	0	#	NaN	NaN	NaN	NaN	NaN	NaN	NaN	NaN	NaN	0	NaN	NaN	0	1	NaN	NaN	NaN	NaN	NaN	NaN	NaN	NaN	NaN	NaN	NaN	NaN	NaN	NaN	NaN	NaN	#	#	#	#	#
#	1	1	#	1	1	1	#	0	#	NaN	NaN	NaN	NaN	NaN	NaN	NaN	NaN	NaN	0	NaN	NaN	NaN	0	NaN	NaN	NaN	NaN	NaN	NaN	NaN	NaN	NaN	NaN	NaN	NaN	NaN	NaN	NaN	NaN	#	#	#	#	#
#	1	1	#	1	1	1	#	0	#	NaN	NaN	NaN	NaN	NaN	NaN	NaN	NaN	NaN	0	NaN	NaN	NaN	1	1	NaN	NaN	NaN	NaN	NaN	NaN	NaN	NaN	NaN	NaN	NaN	NaN	NaN	NaN	NaN	#	#	#	#	#
#	1	1	#	1	1	1	#	0	#	NaN	NaN	NaN	NaN	NaN	NaN	NaN	NaN	NaN	0	NaN	NaN	NaN	1	NaN	NaN	NaN	NaN	NaN	NaN	NaN	NaN	NaN	NaN	NaN	NaN	NaN	NaN	NaN	NaN	#	#	#	#	#
#	1	1	#	1	1	1	#	0	#	NaN	NaN	NaN	NaN	NaN	NaN	NaN	NaN	NaN	0	NaN	NaN	NaN	1	NaN	NaN	0	NaN	NaN	NaN	NaN	NaN	NaN	NaN	NaN	NaN	NaN	NaN	NaN	NaN	#	#	#	#	#
#	1	1	#	1	1	1	#	0	#	NaN	NaN	NaN	NaN	NaN	NaN	NaN	NaN	NaN	0	NaN	NaN	NaN	1	NaN	NaN	NaN	0	NaN	NaN	NaN	NaN	NaN	NaN	NaN	NaN	NaN	NaN	NaN	NaN	#	#	#	#	#
#	1	1	#	1	1	1	#	0	#	NaN	NaN	NaN	NaN	NaN	NaN	NaN	NaN	NaN	0	NaN	NaN	NaN	1	NaN	NaN	NaN	NaN	0	NaN	NaN	NaN	NaN	NaN	NaN	NaN	NaN	NaN	NaN	NaN	#	#	#	#	#
#	1	1	#	1	1	1	#	0	#	NaN	NaN	NaN	NaN	NaN	NaN	NaN	NaN	NaN	0	NaN	NaN	NaN	1	NaN	NaN	NaN	NaN	NaN	1	NaN	NaN	NaN	NaN	NaN	NaN	NaN	NaN	NaN	NaN	#	#	#	#	#
#	1	1	#	1	1	1	#	0	#	NaN	NaN	NaN	NaN	NaN	NaN	NaN	NaN	NaN	0	NaN	NaN	NaN	1	NaN	NaN	NaN	NaN	NaN	NaN	0	NaN	NaN	NaN	NaN	NaN	NaN	NaN	NaN	NaN	#	#	#	#	#
#	1	1	#	1	1	1	#	0	#	NaN	NaN	NaN	NaN	NaN	NaN	NaN	NaN	NaN	0	NaN	NaN	NaN	1	NaN	NaN	NaN	NaN	NaN	NaN	NaN	0	NaN	NaN	NaN	NaN	NaN	NaN	NaN	NaN	#	#	#	#	#
#	1	1	#	1	1	1	#	0	#	NaN	NaN	NaN	NaN	NaN	NaN	NaN	NaN	NaN	0	NaN	NaN	NaN	1	NaN	NaN	NaN	NaN	NaN	NaN	NaN	NaN	0	NaN	NaN	NaN	NaN	NaN	NaN	NaN	#	#	#	#	#
#	1	1	#	1	1	1	#	0	#	NaN	NaN	NaN	NaN	NaN	NaN	NaN	NaN	NaN	0	NaN	NaN	NaN	1	NaN	NaN	NaN	NaN	NaN	NaN	NaN	NaN	NaN	0	NaN	NaN	NaN	NaN	NaN	NaN	#	#	#	#	#
#	1	1	#	1	1	1	#	0	#	NaN	NaN	NaN	NaN	NaN	NaN	NaN	NaN	NaN	0	NaN	NaN	NaN	1	NaN	NaN	NaN	NaN	NaN	NaN	NaN	NaN	NaN	NaN	1	NaN	NaN	NaN	NaN	NaN	#	#	#	#	#
#	1	1	#	1	1	1	#	0	#	NaN	NaN	NaN	NaN	NaN	NaN	NaN	NaN	NaN	0	NaN	NaN	NaN	1	NaN	NaN	NaN	NaN	NaN	NaN	NaN	NaN	NaN	NaN	NaN	1	NaN	NaN	NaN	NaN	#	#	#	#	#
#	1	1	#	1	1	1	#	0	#	NaN	NaN	NaN	NaN	NaN	NaN	NaN	NaN	NaN	0	NaN	NaN	NaN	1	NaN	NaN	NaN	NaN	NaN	NaN	NaN	NaN	NaN	NaN	NaN	NaN	0	NaN	NaN	NaN	#	#	#	#	#
#	1	1	#	1	1	1	#	0	#	NaN	NaN	NaN	NaN	NaN	NaN	NaN	NaN	NaN	0	NaN	NaN	NaN	1	NaN	NaN	NaN	NaN	NaN	NaN	NaN	NaN	NaN	NaN	NaN	NaN	NaN	0	NaN	NaN	#	#	#	#	#
#	1	1	#	1	1	1	#	0	#	NaN	NaN	NaN	NaN	NaN	NaN	NaN	NaN	NaN	0	NaN	NaN	NaN	1	NaN	NaN	NaN	NaN	NaN	NaN	NaN	NaN	NaN	NaN	NaN	NaN	NaN	NaN	0	NaN	#	#	#	#	#
#	1	1	#	1	1	1	#	0	#	NaN	NaN	NaN	NaN	NaN	NaN	NaN	NaN	NaN	0	NaN	NaN	NaN	1	NaN	NaN	NaN	NaN	NaN	NaN	NaN	NaN	NaN	NaN	NaN	NaN	NaN	NaN	NaN	1	#	#	#	#	#
#	1	1	#	1	1	1	#	0	#	NaN	NaN	NaN	NaN	NaN	NaN	NaN	NaN	NaN	NaN	0	1	NaN	1	NaN	NaN	NaN	NaN	NaN	NaN	NaN	NaN	NaN	NaN	NaN	NaN	NaN	NaN	NaN	NaN	#	#	#	#	#
#	1	1	#	1	1	1	#	0	#	NaN	NaN	NaN	NaN	NaN	NaN	NaN	NaN	NaN	NaN	0	NaN	0	1	NaN	NaN	NaN	NaN	NaN	NaN	NaN	NaN	NaN	NaN	NaN	NaN	NaN	NaN	NaN	NaN	#	#	#	#	#
#	1	1	#	1	1	1	#	0	#	NaN	NaN	NaN	NaN	NaN	NaN	NaN	NaN	NaN	NaN	0	NaN	NaN	0	NaN	NaN	NaN	NaN	NaN	NaN	NaN	NaN	NaN	NaN	NaN	NaN	NaN	NaN	NaN	NaN	#	#	#	#	#
#	1	1	#	1	1	1	#	0	#	NaN	NaN	NaN	NaN	NaN	NaN	NaN	NaN	NaN	NaN	0	NaN	NaN	1	1	NaN	NaN	NaN	NaN	NaN	NaN	NaN	NaN	NaN	NaN	NaN	NaN	NaN	NaN	NaN	#	#	#	#	#
#	1	1	#	1	1	1	#	0	#	NaN	NaN	NaN	NaN	NaN	NaN	NaN	NaN	NaN	NaN	0	NaN	NaN	1	NaN	NaN	NaN	NaN	NaN	NaN	NaN	NaN	NaN	NaN	NaN	NaN	NaN	NaN	NaN	NaN	#	#	#	#	#
#	1	1	#	1	1	1	#	0	#	NaN	NaN	NaN	NaN	NaN	NaN	NaN	NaN	NaN	NaN	0	NaN	NaN	1	NaN	NaN	0	NaN	NaN	NaN	NaN	NaN	NaN	NaN	NaN	NaN	NaN	NaN	NaN	NaN	#	#	#	#	#
#	1	1	#	1	1	1	#	0	#	NaN	NaN	NaN	NaN	NaN	NaN	NaN	NaN	NaN	NaN	0	NaN	NaN	1	NaN	NaN	NaN	0	NaN	NaN	NaN	NaN	NaN	NaN	NaN	NaN	NaN	NaN	NaN	NaN	#	#	#	#	#
#	1	1	#	1	1	1	#	0	#	NaN	NaN	NaN	NaN	NaN	NaN	NaN	NaN	NaN	NaN	0	NaN	NaN	1	NaN	NaN	NaN	NaN	0	NaN	NaN	NaN	NaN	NaN	NaN	NaN	NaN	NaN	NaN	NaN	#	#	#	#	#
#	1	1	#	1	1	1	#	0	#	NaN	NaN	NaN	NaN	NaN	NaN	NaN	NaN	NaN	NaN	0	NaN	NaN	1	NaN	NaN	NaN	NaN	NaN	1	NaN	NaN	NaN	NaN	NaN	NaN	NaN	NaN	NaN	NaN	#	#	#	#	#
#	1	1	#	1	1	1	#	0	#	NaN	NaN	NaN	NaN	NaN	NaN	NaN	NaN	NaN	NaN	0	NaN	NaN	1	NaN	NaN	NaN	NaN	NaN	NaN	0	NaN	NaN	NaN	NaN	NaN	NaN	NaN	NaN	NaN	#	#	#	#	#
#	1	1	#	1	1	1	#	0	#	NaN	NaN	NaN	NaN	NaN	NaN	NaN	NaN	NaN	NaN	0	NaN	NaN	1	NaN	NaN	NaN	NaN	NaN	NaN	NaN	0	NaN	NaN	NaN	NaN	NaN	NaN	NaN	NaN	#	#	#	#	#
#	1	1	#	1	1	1	#	0	#	NaN	NaN	NaN	NaN	NaN	NaN	NaN	NaN	NaN	NaN	0	NaN	NaN	1	NaN	NaN	NaN	NaN	NaN	NaN	NaN	NaN	0	NaN	NaN	NaN	NaN	NaN	NaN	NaN	#	#	#	#	#
#	1	1	#	1	1	1	#	0	#	NaN	NaN	NaN	NaN	NaN	NaN	NaN	NaN	NaN	NaN	0	NaN	NaN	1	NaN	NaN	NaN	NaN	NaN	NaN	NaN	NaN	NaN	0	NaN	NaN	NaN	NaN	NaN	NaN	#	#	#	#	#
#	1	1	#	1	1	1	#	0	#	NaN	NaN	NaN	NaN	NaN	NaN	NaN	NaN	NaN	NaN	0	NaN	NaN	1	NaN	NaN	NaN	NaN	NaN	NaN	NaN	NaN	NaN	NaN	1	NaN	NaN	NaN	NaN	NaN	#	#	#	#	#
#	1	1	#	1	1	1	#	0	#	NaN	NaN	NaN	NaN	NaN	NaN	NaN	NaN	NaN	NaN	0	NaN	NaN	1	NaN	NaN	NaN	NaN	NaN	NaN	NaN	NaN	NaN	NaN	NaN	1	NaN	NaN	NaN	NaN	#	#	#	#	#
#	1	1	#	1	1	1	#	0	#	NaN	NaN	NaN	NaN	NaN	NaN	NaN	NaN	NaN	NaN	0	NaN	NaN	1	NaN	NaN	NaN	NaN	NaN	NaN	NaN	NaN	NaN	NaN	NaN	NaN	0	NaN	NaN	NaN	#	#	#	#	#
#	1	1	#	1	1	1	#	0	#	NaN	NaN	NaN	NaN	NaN	NaN	NaN	NaN	NaN	NaN	0	NaN	NaN	1	NaN	NaN	NaN	NaN	NaN	NaN	NaN	NaN	NaN	NaN	NaN	NaN	NaN	0	NaN	NaN	#	#	#	#	#
#	1	1	#	1	1	1	#	0	#	NaN	NaN	NaN	NaN	NaN	NaN	NaN	NaN	NaN	NaN	0	NaN	NaN	1	NaN	NaN	NaN	NaN	NaN	NaN	NaN	NaN	NaN	NaN	NaN	NaN	NaN	NaN	0	NaN	#	#	#	#	#
#	1	1	#	1	1	1	#	0	#	NaN	NaN	NaN	NaN	NaN	NaN	NaN	NaN	NaN	NaN	0	NaN	NaN	1	NaN	NaN	NaN	NaN	NaN	NaN	NaN	NaN	NaN	NaN	NaN	NaN	NaN	NaN	NaN	1	#	#	#	#	#
#	1	1	#	1	1	1	#	0	#	NaN	NaN	NaN	NaN	NaN	NaN	NaN	NaN	NaN	NaN	NaN	1	0	1	NaN	NaN	NaN	NaN	NaN	NaN	NaN	NaN	NaN	NaN	NaN	NaN	NaN	NaN	NaN	NaN	#	#	#	#	#
#	1	1	#	1	1	1	#	0	#	NaN	NaN	NaN	NaN	NaN	NaN	NaN	NaN	NaN	NaN	NaN	1	NaN	0	NaN	NaN	NaN	NaN	NaN	NaN	NaN	NaN	NaN	NaN	NaN	NaN	NaN	NaN	NaN	NaN	#	#	#	#	#
#	1	1	#	1	1	1	#	0	#	NaN	NaN	NaN	NaN	NaN	NaN	NaN	NaN	NaN	NaN	NaN	1	NaN	1	1	NaN	NaN	NaN	NaN	NaN	NaN	NaN	NaN	NaN	NaN	NaN	NaN	NaN	NaN	NaN	#	#	#	#	#
#	1	1	#	1	1	1	#	0	#	NaN	NaN	NaN	NaN	NaN	NaN	NaN	NaN	NaN	NaN	NaN	1	NaN	1	NaN	NaN	NaN	NaN	NaN	NaN	NaN	NaN	NaN	NaN	NaN	NaN	NaN	NaN	NaN	NaN	#	#	#	#	#
#	1	1	#	1	1	1	#	0	#	NaN	NaN	NaN	NaN	NaN	NaN	NaN	NaN	NaN	NaN	NaN	1	NaN	1	NaN	NaN	0	NaN	NaN	NaN	NaN	NaN	NaN	NaN	NaN	NaN	NaN	NaN	NaN	NaN	#	#	#	#	#
#	1	1	#	1	1	1	#	0	#	NaN	NaN	NaN	NaN	NaN	NaN	NaN	NaN	NaN	NaN	NaN	1	NaN	1	NaN	NaN	NaN	0	NaN	NaN	NaN	NaN	NaN	NaN	NaN	NaN	NaN	NaN	NaN	NaN	#	#	#	#	#
#	1	1	#	1	1	1	#	0	#	NaN	NaN	NaN	NaN	NaN	NaN	NaN	NaN	NaN	NaN	NaN	1	NaN	1	NaN	NaN	NaN	NaN	0	NaN	NaN	NaN	NaN	NaN	NaN	NaN	NaN	NaN	NaN	NaN	#	#	#	#	#
#	1	1	#	1	1	1	#	0	#	NaN	NaN	NaN	NaN	NaN	NaN	NaN	NaN	NaN	NaN	NaN	1	NaN	1	NaN	NaN	NaN	NaN	NaN	1	NaN	NaN	NaN	NaN	NaN	NaN	NaN	NaN	NaN	NaN	#	#	#	#	#
#	1	1	#	1	1	1	#	0	#	NaN	NaN	NaN	NaN	NaN	NaN	NaN	NaN	NaN	NaN	NaN	1	NaN	1	NaN	NaN	NaN	NaN	NaN	NaN	0	NaN	NaN	NaN	NaN	NaN	NaN	NaN	NaN	NaN	#	#	#	#	#
#	1	1	#	1	1	1	#	0	#	NaN	NaN	NaN	NaN	NaN	NaN	NaN	NaN	NaN	NaN	NaN	1	NaN	1	NaN	NaN	NaN	NaN	NaN	NaN	NaN	0	NaN	NaN	NaN	NaN	NaN	NaN	NaN	NaN	#	#	#	#	#
#	1	1	#	1	1	1	#	0	#	NaN	NaN	NaN	NaN	NaN	NaN	NaN	NaN	NaN	NaN	NaN	1	NaN	1	NaN	NaN	NaN	NaN	NaN	NaN	NaN	NaN	0	NaN	NaN	NaN	NaN	NaN	NaN	NaN	#	#	#	#	#
#	1	1	#	1	1	1	#	0	#	NaN	NaN	NaN	NaN	NaN	NaN	NaN	NaN	NaN	NaN	NaN	1	NaN	1	NaN	NaN	NaN	NaN	NaN	NaN	NaN	NaN	NaN	0	NaN	NaN	NaN	NaN	NaN	NaN	#	#	#	#	#
#	1	1	#	1	1	1	#	0	#	NaN	NaN	NaN	NaN	NaN	NaN	NaN	NaN	NaN	NaN	NaN	1	NaN	1	NaN	NaN	NaN	NaN	NaN	NaN	NaN	NaN	NaN	NaN	1	NaN	NaN	NaN	NaN	NaN	#	#	#	#	#
#	1	1	#	1	1	1	#	0	#	NaN	NaN	NaN	NaN	NaN	NaN	NaN	NaN	NaN	NaN	NaN	1	NaN	1	NaN	NaN	NaN	NaN	NaN	NaN	NaN	NaN	NaN	NaN	NaN	1	NaN	NaN	NaN	NaN	#	#	#	#	#
#	1	1	#	1	1	1	#	0	#	NaN	NaN	NaN	NaN	NaN	NaN	NaN	NaN	NaN	NaN	NaN	1	NaN	1	NaN	NaN	NaN	NaN	NaN	NaN	NaN	NaN	NaN	NaN	NaN	NaN	0	NaN	NaN	NaN	#	#	#	#	#
#	1	1	#	1	1	1	#	0	#	NaN	NaN	NaN	NaN	NaN	NaN	NaN	NaN	NaN	NaN	NaN	1	NaN	1	NaN	NaN	NaN	NaN	NaN	NaN	NaN	NaN	NaN	NaN	NaN	NaN	NaN	0	NaN	NaN	#	#	#	#	#
#	1	1	#	1	1	1	#	0	#	NaN	NaN	NaN	NaN	NaN	NaN	NaN	NaN	NaN	NaN	NaN	1	NaN	1	NaN	NaN	NaN	NaN	NaN	NaN	NaN	NaN	NaN	NaN	NaN	NaN	NaN	NaN	0	NaN	#	#	#	#	#
#	1	1	#	1	1	1	#	0	#	NaN	NaN	NaN	NaN	NaN	NaN	NaN	NaN	NaN	NaN	NaN	1	NaN	1	NaN	NaN	NaN	NaN	NaN	NaN	NaN	NaN	NaN	NaN	NaN	NaN	NaN	NaN	NaN	1	#	#	#	#	#
#	1	1	#	1	1	1	#	0	#	NaN	NaN	NaN	NaN	NaN	NaN	NaN	NaN	NaN	NaN	NaN	NaN	0	0	NaN	NaN	NaN	NaN	NaN	NaN	NaN	NaN	NaN	NaN	NaN	NaN	NaN	NaN	NaN	NaN	#	#	#	#	#
#	1	1	#	1	1	1	#	0	#	NaN	NaN	NaN	NaN	NaN	NaN	NaN	NaN	NaN	NaN	NaN	NaN	0	1	1	NaN	NaN	NaN	NaN	NaN	NaN	NaN	NaN	NaN	NaN	NaN	NaN	NaN	NaN	NaN	#	#	#	#	#
#	1	1	#	1	1	1	#	0	#	NaN	NaN	NaN	NaN	NaN	NaN	NaN	NaN	NaN	NaN	NaN	NaN	0	1	NaN	NaN	NaN	NaN	NaN	NaN	NaN	NaN	NaN	NaN	NaN	NaN	NaN	NaN	NaN	NaN	#	#	#	#	#
#	1	1	#	1	1	1	#	0	#	NaN	NaN	NaN	NaN	NaN	NaN	NaN	NaN	NaN	NaN	NaN	NaN	0	1	NaN	NaN	0	NaN	NaN	NaN	NaN	NaN	NaN	NaN	NaN	NaN	NaN	NaN	NaN	NaN	#	#	#	#	#
#	1	1	#	1	1	1	#	0	#	NaN	NaN	NaN	NaN	NaN	NaN	NaN	NaN	NaN	NaN	NaN	NaN	0	1	NaN	NaN	NaN	0	NaN	NaN	NaN	NaN	NaN	NaN	NaN	NaN	NaN	NaN	NaN	NaN	#	#	#	#	#
#	1	1	#	1	1	1	#	0	#	NaN	NaN	NaN	NaN	NaN	NaN	NaN	NaN	NaN	NaN	NaN	NaN	0	1	NaN	NaN	NaN	NaN	0	NaN	NaN	NaN	NaN	NaN	NaN	NaN	NaN	NaN	NaN	NaN	#	#	#	#	#
#	1	1	#	1	1	1	#	0	#	NaN	NaN	NaN	NaN	NaN	NaN	NaN	NaN	NaN	NaN	NaN	NaN	0	1	NaN	NaN	NaN	NaN	NaN	1	NaN	NaN	NaN	NaN	NaN	NaN	NaN	NaN	NaN	NaN	#	#	#	#	#
#	1	1	#	1	1	1	#	0	#	NaN	NaN	NaN	NaN	NaN	NaN	NaN	NaN	NaN	NaN	NaN	NaN	0	1	NaN	NaN	NaN	NaN	NaN	NaN	0	NaN	NaN	NaN	NaN	NaN	NaN	NaN	NaN	NaN	#	#	#	#	#
#	1	1	#	1	1	1	#	0	#	NaN	NaN	NaN	NaN	NaN	NaN	NaN	NaN	NaN	NaN	NaN	NaN	0	1	NaN	NaN	NaN	NaN	NaN	NaN	NaN	0	NaN	NaN	NaN	NaN	NaN	NaN	NaN	NaN	#	#	#	#	#
#	1	1	#	1	1	1	#	0	#	NaN	NaN	NaN	NaN	NaN	NaN	NaN	NaN	NaN	NaN	NaN	NaN	0	1	NaN	NaN	NaN	NaN	NaN	NaN	NaN	NaN	0	NaN	NaN	NaN	NaN	NaN	NaN	NaN	#	#	#	#	#
#	1	1	#	1	1	1	#	0	#	NaN	NaN	NaN	NaN	NaN	NaN	NaN	NaN	NaN	NaN	NaN	NaN	0	1	NaN	NaN	NaN	NaN	NaN	NaN	NaN	NaN	NaN	0	NaN	NaN	NaN	NaN	NaN	NaN	#	#	#	#	#
#	1	1	#	1	1	1	#	0	#	NaN	NaN	NaN	NaN	NaN	NaN	NaN	NaN	NaN	NaN	NaN	NaN	0	1	NaN	NaN	NaN	NaN	NaN	NaN	NaN	NaN	NaN	NaN	1	NaN	NaN	NaN	NaN	NaN	#	#	#	#	#
#	1	1	#	1	1	1	#	0	#	NaN	NaN	NaN	NaN	NaN	NaN	NaN	NaN	NaN	NaN	NaN	NaN	0	1	NaN	NaN	NaN	NaN	NaN	NaN	NaN	NaN	NaN	NaN	NaN	1	NaN	NaN	NaN	NaN	#	#	#	#	#
#	1	1	#	1	1	1	#	0	#	NaN	NaN	NaN	NaN	NaN	NaN	NaN	NaN	NaN	NaN	NaN	NaN	0	1	NaN	NaN	NaN	NaN	NaN	NaN	NaN	NaN	NaN	NaN	NaN	NaN	0	NaN	NaN	NaN	#	#	#	#	#
#	1	1	#	1	1	1	#	0	#	NaN	NaN	NaN	NaN	NaN	NaN	NaN	NaN	NaN	NaN	NaN	NaN	0	1	NaN	NaN	NaN	NaN	NaN	NaN	NaN	NaN	NaN	NaN	NaN	NaN	NaN	0	NaN	NaN	#	#	#	#	#
#	1	1	#	1	1	1	#	0	#	NaN	NaN	NaN	NaN	NaN	NaN	NaN	NaN	NaN	NaN	NaN	NaN	0	1	NaN	NaN	NaN	NaN	NaN	NaN	NaN	NaN	NaN	NaN	NaN	NaN	NaN	NaN	0	NaN	#	#	#	#	#
#	1	1	#	1	1	1	#	0	#	NaN	NaN	NaN	NaN	NaN	NaN	NaN	NaN	NaN	NaN	NaN	NaN	0	1	NaN	NaN	NaN	NaN	NaN	NaN	NaN	NaN	NaN	NaN	NaN	NaN	NaN	NaN	NaN	1	#	#	#	#	#
#	1	1	#	1	1	1	#	0	#	NaN	NaN	NaN	NaN	NaN	NaN	NaN	NaN	NaN	NaN	NaN	NaN	NaN	0	1	NaN	NaN	NaN	NaN	NaN	NaN	NaN	NaN	NaN	NaN	NaN	NaN	NaN	NaN	NaN	#	#	#	#	#
#	1	1	#	1	1	1	#	0	#	NaN	NaN	NaN	NaN	NaN	NaN	NaN	NaN	NaN	NaN	NaN	NaN	NaN	0	NaN	NaN	NaN	NaN	NaN	NaN	NaN	NaN	NaN	NaN	NaN	NaN	NaN	NaN	NaN	NaN	#	#	#	#	#
#	1	1	#	1	1	1	#	0	#	NaN	NaN	NaN	NaN	NaN	NaN	NaN	NaN	NaN	NaN	NaN	NaN	NaN	0	NaN	NaN	0	NaN	NaN	NaN	NaN	NaN	NaN	NaN	NaN	NaN	NaN	NaN	NaN	NaN	#	#	#	#	#
#	1	1	#	1	1	1	#	0	#	NaN	NaN	NaN	NaN	NaN	NaN	NaN	NaN	NaN	NaN	NaN	NaN	NaN	0	NaN	NaN	NaN	0	NaN	NaN	NaN	NaN	NaN	NaN	NaN	NaN	NaN	NaN	NaN	NaN	#	#	#	#	#
#	1	1	#	1	1	1	#	0	#	NaN	NaN	NaN	NaN	NaN	NaN	NaN	NaN	NaN	NaN	NaN	NaN	NaN	0	NaN	NaN	NaN	NaN	0	NaN	NaN	NaN	NaN	NaN	NaN	NaN	NaN	NaN	NaN	NaN	#	#	#	#	#
#	1	1	#	1	1	1	#	0	#	NaN	NaN	NaN	NaN	NaN	NaN	NaN	NaN	NaN	NaN	NaN	NaN	NaN	0	NaN	NaN	NaN	NaN	NaN	1	NaN	NaN	NaN	NaN	NaN	NaN	NaN	NaN	NaN	NaN	#	#	#	#	#
#	1	1	#	1	1	1	#	0	#	NaN	NaN	NaN	NaN	NaN	NaN	NaN	NaN	NaN	NaN	NaN	NaN	NaN	0	NaN	NaN	NaN	NaN	NaN	NaN	0	NaN	NaN	NaN	NaN	NaN	NaN	NaN	NaN	NaN	#	#	#	#	#
#	1	1	#	1	1	1	#	0	#	NaN	NaN	NaN	NaN	NaN	NaN	NaN	NaN	NaN	NaN	NaN	NaN	NaN	0	NaN	NaN	NaN	NaN	NaN	NaN	NaN	0	NaN	NaN	NaN	NaN	NaN	NaN	NaN	NaN	#	#	#	#	#
#	1	1	#	1	1	1	#	0	#	NaN	NaN	NaN	NaN	NaN	NaN	NaN	NaN	NaN	NaN	NaN	NaN	NaN	0	NaN	NaN	NaN	NaN	NaN	NaN	NaN	NaN	0	NaN	NaN	NaN	NaN	NaN	NaN	NaN	#	#	#	#	#
#	1	1	#	1	1	1	#	0	#	NaN	NaN	NaN	NaN	NaN	NaN	NaN	NaN	NaN	NaN	NaN	NaN	NaN	0	NaN	NaN	NaN	NaN	NaN	NaN	NaN	NaN	NaN	0	NaN	NaN	NaN	NaN	NaN	NaN	#	#	#	#	#
#	1	1	#	1	1	1	#	0	#	NaN	NaN	NaN	NaN	NaN	NaN	NaN	NaN	NaN	NaN	NaN	NaN	NaN	0	NaN	NaN	NaN	NaN	NaN	NaN	NaN	NaN	NaN	NaN	1	NaN	NaN	NaN	NaN	NaN	#	#	#	#	#
#	1	1	#	1	1	1	#	0	#	NaN	NaN	NaN	NaN	NaN	NaN	NaN	NaN	NaN	NaN	NaN	NaN	NaN	0	NaN	NaN	NaN	NaN	NaN	NaN	NaN	NaN	NaN	NaN	NaN	1	NaN	NaN	NaN	NaN	#	#	#	#	#
#	1	1	#	1	1	1	#	0	#	NaN	NaN	NaN	NaN	NaN	NaN	NaN	NaN	NaN	NaN	NaN	NaN	NaN	0	NaN	NaN	NaN	NaN	NaN	NaN	NaN	NaN	NaN	NaN	NaN	NaN	0	NaN	NaN	NaN	#	#	#	#	#
#	1	1	#	1	1	1	#	0	#	NaN	NaN	NaN	NaN	NaN	NaN	NaN	NaN	NaN	NaN	NaN	NaN	NaN	0	NaN	NaN	NaN	NaN	NaN	NaN	NaN	NaN	NaN	NaN	NaN	NaN	NaN	0	NaN	NaN	#	#	#	#	#
#	1	1	#	1	1	1	#	0	#	NaN	NaN	NaN	NaN	NaN	NaN	NaN	NaN	NaN	NaN	NaN	NaN	NaN	0	NaN	NaN	NaN	NaN	NaN	NaN	NaN	NaN	NaN	NaN	NaN	NaN	NaN	NaN	0	NaN	#	#	#	#	#
#	1	1	#	1	1	1	#	0	#	NaN	NaN	NaN	NaN	NaN	NaN	NaN	NaN	NaN	NaN	NaN	NaN	NaN	0	NaN	NaN	NaN	NaN	NaN	NaN	NaN	NaN	NaN	NaN	NaN	NaN	NaN	NaN	NaN	1	#	#	#	#	#
#	1	1	#	1	1	1	#	0	#	NaN	NaN	NaN	NaN	NaN	NaN	NaN	NaN	NaN	NaN	NaN	NaN	NaN	1	1	NaN	NaN	NaN	NaN	NaN	NaN	NaN	NaN	NaN	NaN	NaN	NaN	NaN	NaN	NaN	#	#	#	#	#
#	1	1	#	1	1	1	#	0	#	NaN	NaN	NaN	NaN	NaN	NaN	NaN	NaN	NaN	NaN	NaN	NaN	NaN	1	1	NaN	0	NaN	NaN	NaN	NaN	NaN	NaN	NaN	NaN	NaN	NaN	NaN	NaN	NaN	#	#	#	#	#
#	1	1	#	1	1	1	#	0	#	NaN	NaN	NaN	NaN	NaN	NaN	NaN	NaN	NaN	NaN	NaN	NaN	NaN	1	1	NaN	NaN	0	NaN	NaN	NaN	NaN	NaN	NaN	NaN	NaN	NaN	NaN	NaN	NaN	#	#	#	#	#
#	1	1	#	1	1	1	#	0	#	NaN	NaN	NaN	NaN	NaN	NaN	NaN	NaN	NaN	NaN	NaN	NaN	NaN	1	1	NaN	NaN	NaN	0	NaN	NaN	NaN	NaN	NaN	NaN	NaN	NaN	NaN	NaN	NaN	#	#	#	#	#
#	1	1	#	1	1	1	#	0	#	NaN	NaN	NaN	NaN	NaN	NaN	NaN	NaN	NaN	NaN	NaN	NaN	NaN	1	1	NaN	NaN	NaN	NaN	1	NaN	NaN	NaN	NaN	NaN	NaN	NaN	NaN	NaN	NaN	#	#	#	#	#
#	1	1	#	1	1	1	#	0	#	NaN	NaN	NaN	NaN	NaN	NaN	NaN	NaN	NaN	NaN	NaN	NaN	NaN	1	1	NaN	NaN	NaN	NaN	NaN	0	NaN	NaN	NaN	NaN	NaN	NaN	NaN	NaN	NaN	#	#	#	#	#
#	1	1	#	1	1	1	#	0	#	NaN	NaN	NaN	NaN	NaN	NaN	NaN	NaN	NaN	NaN	NaN	NaN	NaN	1	1	NaN	NaN	NaN	NaN	NaN	NaN	0	NaN	NaN	NaN	NaN	NaN	NaN	NaN	NaN	#	#	#	#	#
#	1	1	#	1	1	1	#	0	#	NaN	NaN	NaN	NaN	NaN	NaN	NaN	NaN	NaN	NaN	NaN	NaN	NaN	1	1	NaN	NaN	NaN	NaN	NaN	NaN	NaN	0	NaN	NaN	NaN	NaN	NaN	NaN	NaN	#	#	#	#	#
#	1	1	#	1	1	1	#	0	#	NaN	NaN	NaN	NaN	NaN	NaN	NaN	NaN	NaN	NaN	NaN	NaN	NaN	1	1	NaN	NaN	NaN	NaN	NaN	NaN	NaN	NaN	0	NaN	NaN	NaN	NaN	NaN	NaN	#	#	#	#	#
#	1	1	#	1	1	1	#	0	#	NaN	NaN	NaN	NaN	NaN	NaN	NaN	NaN	NaN	NaN	NaN	NaN	NaN	1	1	NaN	NaN	NaN	NaN	NaN	NaN	NaN	NaN	NaN	1	NaN	NaN	NaN	NaN	NaN	#	#	#	#	#
#	1	1	#	1	1	1	#	0	#	NaN	NaN	NaN	NaN	NaN	NaN	NaN	NaN	NaN	NaN	NaN	NaN	NaN	1	1	NaN	NaN	NaN	NaN	NaN	NaN	NaN	NaN	NaN	NaN	1	NaN	NaN	NaN	NaN	#	#	#	#	#
#	1	1	#	1	1	1	#	0	#	NaN	NaN	NaN	NaN	NaN	NaN	NaN	NaN	NaN	NaN	NaN	NaN	NaN	1	1	NaN	NaN	NaN	NaN	NaN	NaN	NaN	NaN	NaN	NaN	NaN	0	NaN	NaN	NaN	#	#	#	#	#
#	1	1	#	1	1	1	#	0	#	NaN	NaN	NaN	NaN	NaN	NaN	NaN	NaN	NaN	NaN	NaN	NaN	NaN	1	1	NaN	NaN	NaN	NaN	NaN	NaN	NaN	NaN	NaN	NaN	NaN	NaN	0	NaN	NaN	#	#	#	#	#
#	1	1	#	1	1	1	#	0	#	NaN	NaN	NaN	NaN	NaN	NaN	NaN	NaN	NaN	NaN	NaN	NaN	NaN	1	1	NaN	NaN	NaN	NaN	NaN	NaN	NaN	NaN	NaN	NaN	NaN	NaN	NaN	0	NaN	#	#	#	#	#
#	1	1	#	1	1	1	#	0	#	NaN	NaN	NaN	NaN	NaN	NaN	NaN	NaN	NaN	NaN	NaN	NaN	NaN	1	1	NaN	NaN	NaN	NaN	NaN	NaN	NaN	NaN	NaN	NaN	NaN	NaN	NaN	NaN	1	#	#	#	#	#
#	1	1	#	1	1	1	#	0	#	NaN	NaN	NaN	NaN	NaN	NaN	NaN	NaN	NaN	NaN	NaN	NaN	NaN	1	NaN	NaN	0	NaN	NaN	NaN	NaN	NaN	NaN	NaN	NaN	NaN	NaN	NaN	NaN	NaN	#	#	#	#	#
#	1	1	#	1	1	1	#	0	#	NaN	NaN	NaN	NaN	NaN	NaN	NaN	NaN	NaN	NaN	NaN	NaN	NaN	1	NaN	NaN	NaN	0	NaN	NaN	NaN	NaN	NaN	NaN	NaN	NaN	NaN	NaN	NaN	NaN	#	#	#	#	#
#	1	1	#	1	1	1	#	0	#	NaN	NaN	NaN	NaN	NaN	NaN	NaN	NaN	NaN	NaN	NaN	NaN	NaN	1	NaN	NaN	NaN	NaN	0	NaN	NaN	NaN	NaN	NaN	NaN	NaN	NaN	NaN	NaN	NaN	#	#	#	#	#
#	1	1	#	1	1	1	#	0	#	NaN	NaN	NaN	NaN	NaN	NaN	NaN	NaN	NaN	NaN	NaN	NaN	NaN	1	NaN	NaN	NaN	NaN	NaN	1	NaN	NaN	NaN	NaN	NaN	NaN	NaN	NaN	NaN	NaN	#	#	#	#	#
#	1	1	#	1	1	1	#	0	#	NaN	NaN	NaN	NaN	NaN	NaN	NaN	NaN	NaN	NaN	NaN	NaN	NaN	1	NaN	NaN	NaN	NaN	NaN	NaN	0	NaN	NaN	NaN	NaN	NaN	NaN	NaN	NaN	NaN	#	#	#	#	#
#	1	1	#	1	1	1	#	0	#	NaN	NaN	NaN	NaN	NaN	NaN	NaN	NaN	NaN	NaN	NaN	NaN	NaN	1	NaN	NaN	NaN	NaN	NaN	NaN	NaN	0	NaN	NaN	NaN	NaN	NaN	NaN	NaN	NaN	#	#	#	#	#
#	1	1	#	1	1	1	#	0	#	NaN	NaN	NaN	NaN	NaN	NaN	NaN	NaN	NaN	NaN	NaN	NaN	NaN	1	NaN	NaN	NaN	NaN	NaN	NaN	NaN	NaN	0	NaN	NaN	NaN	NaN	NaN	NaN	NaN	#	#	#	#	#
#	1	1	#	1	1	1	#	0	#	NaN	NaN	NaN	NaN	NaN	NaN	NaN	NaN	NaN	NaN	NaN	NaN	NaN	1	NaN	NaN	NaN	NaN	NaN	NaN	NaN	NaN	NaN	0	NaN	NaN	NaN	NaN	NaN	NaN	#	#	#	#	#
#	1	1	#	1	1	1	#	0	#	NaN	NaN	NaN	NaN	NaN	NaN	NaN	NaN	NaN	NaN	NaN	NaN	NaN	1	NaN	NaN	NaN	NaN	NaN	NaN	NaN	NaN	NaN	NaN	1	NaN	NaN	NaN	NaN	NaN	#	#	#	#	#
#	1	1	#	1	1	1	#	0	#	NaN	NaN	NaN	NaN	NaN	NaN	NaN	NaN	NaN	NaN	NaN	NaN	NaN	1	NaN	NaN	NaN	NaN	NaN	NaN	NaN	NaN	NaN	NaN	NaN	1	NaN	NaN	NaN	NaN	#	#	#	#	#
#	1	1	#	1	1	1	#	0	#	NaN	NaN	NaN	NaN	NaN	NaN	NaN	NaN	NaN	NaN	NaN	NaN	NaN	1	NaN	NaN	NaN	NaN	NaN	NaN	NaN	NaN	NaN	NaN	NaN	NaN	0	NaN	NaN	NaN	#	#	#	#	#
#	1	1	#	1	1	1	#	0	#	NaN	NaN	NaN	NaN	NaN	NaN	NaN	NaN	NaN	NaN	NaN	NaN	NaN	1	NaN	NaN	NaN	NaN	NaN	NaN	NaN	NaN	NaN	NaN	NaN	NaN	NaN	0	NaN	NaN	#	#	#	#	#
#	1	1	#	1	1	1	#	0	#	NaN	NaN	NaN	NaN	NaN	NaN	NaN	NaN	NaN	NaN	NaN	NaN	NaN	1	NaN	NaN	NaN	NaN	NaN	NaN	NaN	NaN	NaN	NaN	NaN	NaN	NaN	NaN	0	NaN	#	#	#	#	#
#	1	1	#	1	1	1	#	0	#	NaN	NaN	NaN	NaN	NaN	NaN	NaN	NaN	NaN	NaN	NaN	NaN	NaN	1	NaN	NaN	NaN	NaN	NaN	NaN	NaN	NaN	NaN	NaN	NaN	NaN	NaN	NaN	NaN	1	#	#	#	#	#
#	1	1	#	1	1	1	#	0	#	NaN	NaN	NaN	NaN	NaN	NaN	NaN	NaN	NaN	NaN	NaN	NaN	NaN	1	NaN	NaN	0	0	NaN	NaN	NaN	NaN	NaN	NaN	NaN	NaN	NaN	NaN	NaN	NaN	#	#	#	#	#
#	1	1	#	1	1	1	#	0	#	NaN	NaN	NaN	NaN	NaN	NaN	NaN	NaN	NaN	NaN	NaN	NaN	NaN	1	NaN	NaN	0	NaN	0	NaN	NaN	NaN	NaN	NaN	NaN	NaN	NaN	NaN	NaN	NaN	#	#	#	#	#
#	1	1	#	1	1	1	#	0	#	NaN	NaN	NaN	NaN	NaN	NaN	NaN	NaN	NaN	NaN	NaN	NaN	NaN	1	NaN	NaN	0	NaN	NaN	1	NaN	NaN	NaN	NaN	NaN	NaN	NaN	NaN	NaN	NaN	#	#	#	#	#
#	1	1	#	1	1	1	#	0	#	NaN	NaN	NaN	NaN	NaN	NaN	NaN	NaN	NaN	NaN	NaN	NaN	NaN	1	NaN	NaN	0	NaN	NaN	NaN	0	NaN	NaN	NaN	NaN	NaN	NaN	NaN	NaN	NaN	#	#	#	#	#
#	1	1	#	1	1	1	#	0	#	NaN	NaN	NaN	NaN	NaN	NaN	NaN	NaN	NaN	NaN	NaN	NaN	NaN	1	NaN	NaN	0	NaN	NaN	NaN	NaN	0	NaN	NaN	NaN	NaN	NaN	NaN	NaN	NaN	#	#	#	#	#
#	1	1	#	1	1	1	#	0	#	NaN	NaN	NaN	NaN	NaN	NaN	NaN	NaN	NaN	NaN	NaN	NaN	NaN	1	NaN	NaN	0	NaN	NaN	NaN	NaN	NaN	0	NaN	NaN	NaN	NaN	NaN	NaN	NaN	#	#	#	#	#
#	1	1	#	1	1	1	#	0	#	NaN	NaN	NaN	NaN	NaN	NaN	NaN	NaN	NaN	NaN	NaN	NaN	NaN	1	NaN	NaN	0	NaN	NaN	NaN	NaN	NaN	NaN	0	NaN	NaN	NaN	NaN	NaN	NaN	#	#	#	#	#
#	1	1	#	1	1	1	#	0	#	NaN	NaN	NaN	NaN	NaN	NaN	NaN	NaN	NaN	NaN	NaN	NaN	NaN	1	NaN	NaN	0	NaN	NaN	NaN	NaN	NaN	NaN	NaN	1	NaN	NaN	NaN	NaN	NaN	#	#	#	#	#
#	1	1	#	1	1	1	#	0	#	NaN	NaN	NaN	NaN	NaN	NaN	NaN	NaN	NaN	NaN	NaN	NaN	NaN	1	NaN	NaN	0	NaN	NaN	NaN	NaN	NaN	NaN	NaN	NaN	1	NaN	NaN	NaN	NaN	#	#	#	#	#
#	1	1	#	1	1	1	#	0	#	NaN	NaN	NaN	NaN	NaN	NaN	NaN	NaN	NaN	NaN	NaN	NaN	NaN	1	NaN	NaN	0	NaN	NaN	NaN	NaN	NaN	NaN	NaN	NaN	NaN	0	NaN	NaN	NaN	#	#	#	#	#
#	1	1	#	1	1	1	#	0	#	NaN	NaN	NaN	NaN	NaN	NaN	NaN	NaN	NaN	NaN	NaN	NaN	NaN	1	NaN	NaN	0	NaN	NaN	NaN	NaN	NaN	NaN	NaN	NaN	NaN	NaN	0	NaN	NaN	#	#	#	#	#
#	1	1	#	1	1	1	#	0	#	NaN	NaN	NaN	NaN	NaN	NaN	NaN	NaN	NaN	NaN	NaN	NaN	NaN	1	NaN	NaN	0	NaN	NaN	NaN	NaN	NaN	NaN	NaN	NaN	NaN	NaN	NaN	0	NaN	#	#	#	#	#
#	1	1	#	1	1	1	#	0	#	NaN	NaN	NaN	NaN	NaN	NaN	NaN	NaN	NaN	NaN	NaN	NaN	NaN	1	NaN	NaN	0	NaN	NaN	NaN	NaN	NaN	NaN	NaN	NaN	NaN	NaN	NaN	NaN	1	#	#	#	#	#
#	1	1	#	1	1	1	#	0	#	NaN	NaN	NaN	NaN	NaN	NaN	NaN	NaN	NaN	NaN	NaN	NaN	NaN	1	NaN	NaN	NaN	0	0	NaN	NaN	NaN	NaN	NaN	NaN	NaN	NaN	NaN	NaN	NaN	#	#	#	#	#
#	1	1	#	1	1	1	#	0	#	NaN	NaN	NaN	NaN	NaN	NaN	NaN	NaN	NaN	NaN	NaN	NaN	NaN	1	NaN	NaN	NaN	0	NaN	1	NaN	NaN	NaN	NaN	NaN	NaN	NaN	NaN	NaN	NaN	#	#	#	#	#
#	1	1	#	1	1	1	#	0	#	NaN	NaN	NaN	NaN	NaN	NaN	NaN	NaN	NaN	NaN	NaN	NaN	NaN	1	NaN	NaN	NaN	0	NaN	NaN	0	NaN	NaN	NaN	NaN	NaN	NaN	NaN	NaN	NaN	#	#	#	#	#
#	1	1	#	1	1	1	#	0	#	NaN	NaN	NaN	NaN	NaN	NaN	NaN	NaN	NaN	NaN	NaN	NaN	NaN	1	NaN	NaN	NaN	0	NaN	NaN	NaN	0	NaN	NaN	NaN	NaN	NaN	NaN	NaN	NaN	#	#	#	#	#
#	1	1	#	1	1	1	#	0	#	NaN	NaN	NaN	NaN	NaN	NaN	NaN	NaN	NaN	NaN	NaN	NaN	NaN	1	NaN	NaN	NaN	0	NaN	NaN	NaN	NaN	0	NaN	NaN	NaN	NaN	NaN	NaN	NaN	#	#	#	#	#
#	1	1	#	1	1	1	#	0	#	NaN	NaN	NaN	NaN	NaN	NaN	NaN	NaN	NaN	NaN	NaN	NaN	NaN	1	NaN	NaN	NaN	0	NaN	NaN	NaN	NaN	NaN	0	NaN	NaN	NaN	NaN	NaN	NaN	#	#	#	#	#
#	1	1	#	1	1	1	#	0	#	NaN	NaN	NaN	NaN	NaN	NaN	NaN	NaN	NaN	NaN	NaN	NaN	NaN	1	NaN	NaN	NaN	0	NaN	NaN	NaN	NaN	NaN	NaN	1	NaN	NaN	NaN	NaN	NaN	#	#	#	#	#
#	1	1	#	1	1	1	#	0	#	NaN	NaN	NaN	NaN	NaN	NaN	NaN	NaN	NaN	NaN	NaN	NaN	NaN	1	NaN	NaN	NaN	0	NaN	NaN	NaN	NaN	NaN	NaN	NaN	1	NaN	NaN	NaN	NaN	#	#	#	#	#
#	1	1	#	1	1	1	#	0	#	NaN	NaN	NaN	NaN	NaN	NaN	NaN	NaN	NaN	NaN	NaN	NaN	NaN	1	NaN	NaN	NaN	0	NaN	NaN	NaN	NaN	NaN	NaN	NaN	NaN	0	NaN	NaN	NaN	#	#	#	#	#
#	1	1	#	1	1	1	#	0	#	NaN	NaN	NaN	NaN	NaN	NaN	NaN	NaN	NaN	NaN	NaN	NaN	NaN	1	NaN	NaN	NaN	0	NaN	NaN	NaN	NaN	NaN	NaN	NaN	NaN	NaN	0	NaN	NaN	#	#	#	#	#
#	1	1	#	1	1	1	#	0	#	NaN	NaN	NaN	NaN	NaN	NaN	NaN	NaN	NaN	NaN	NaN	NaN	NaN	1	NaN	NaN	NaN	0	NaN	NaN	NaN	NaN	NaN	NaN	NaN	NaN	NaN	NaN	0	NaN	#	#	#	#	#
#	1	1	#	1	1	1	#	0	#	NaN	NaN	NaN	NaN	NaN	NaN	NaN	NaN	NaN	NaN	NaN	NaN	NaN	1	NaN	NaN	NaN	0	NaN	NaN	NaN	NaN	NaN	NaN	NaN	NaN	NaN	NaN	NaN	1	#	#	#	#	#
#	1	1	#	1	1	1	#	0	#	NaN	NaN	NaN	NaN	NaN	NaN	NaN	NaN	NaN	NaN	NaN	NaN	NaN	1	NaN	NaN	NaN	NaN	0	1	NaN	NaN	NaN	NaN	NaN	NaN	NaN	NaN	NaN	NaN	#	#	#	#	#
#	1	1	#	1	1	1	#	0	#	NaN	NaN	NaN	NaN	NaN	NaN	NaN	NaN	NaN	NaN	NaN	NaN	NaN	1	NaN	NaN	NaN	NaN	0	NaN	0	NaN	NaN	NaN	NaN	NaN	NaN	NaN	NaN	NaN	#	#	#	#	#
#	1	1	#	1	1	1	#	0	#	NaN	NaN	NaN	NaN	NaN	NaN	NaN	NaN	NaN	NaN	NaN	NaN	NaN	1	NaN	NaN	NaN	NaN	0	NaN	NaN	0	NaN	NaN	NaN	NaN	NaN	NaN	NaN	NaN	#	#	#	#	#
#	1	1	#	1	1	1	#	0	#	NaN	NaN	NaN	NaN	NaN	NaN	NaN	NaN	NaN	NaN	NaN	NaN	NaN	1	NaN	NaN	NaN	NaN	0	NaN	NaN	NaN	0	NaN	NaN	NaN	NaN	NaN	NaN	NaN	#	#	#	#	#
#	1	1	#	1	1	1	#	0	#	NaN	NaN	NaN	NaN	NaN	NaN	NaN	NaN	NaN	NaN	NaN	NaN	NaN	1	NaN	NaN	NaN	NaN	0	NaN	NaN	NaN	NaN	0	NaN	NaN	NaN	NaN	NaN	NaN	#	#	#	#	#
#	1	1	#	1	1	1	#	0	#	NaN	NaN	NaN	NaN	NaN	NaN	NaN	NaN	NaN	NaN	NaN	NaN	NaN	1	NaN	NaN	NaN	NaN	0	NaN	NaN	NaN	NaN	NaN	1	NaN	NaN	NaN	NaN	NaN	#	#	#	#	#
#	1	1	#	1	1	1	#	0	#	NaN	NaN	NaN	NaN	NaN	NaN	NaN	NaN	NaN	NaN	NaN	NaN	NaN	1	NaN	NaN	NaN	NaN	0	NaN	NaN	NaN	NaN	NaN	NaN	1	NaN	NaN	NaN	NaN	#	#	#	#	#
#	1	1	#	1	1	1	#	0	#	NaN	NaN	NaN	NaN	NaN	NaN	NaN	NaN	NaN	NaN	NaN	NaN	NaN	1	NaN	NaN	NaN	NaN	0	NaN	NaN	NaN	NaN	NaN	NaN	NaN	0	NaN	NaN	NaN	#	#	#	#	#
#	1	1	#	1	1	1	#	0	#	NaN	NaN	NaN	NaN	NaN	NaN	NaN	NaN	NaN	NaN	NaN	NaN	NaN	1	NaN	NaN	NaN	NaN	0	NaN	NaN	NaN	NaN	NaN	NaN	NaN	NaN	0	NaN	NaN	#	#	#	#	#
#	1	1	#	1	1	1	#	0	#	NaN	NaN	NaN	NaN	NaN	NaN	NaN	NaN	NaN	NaN	NaN	NaN	NaN	1	NaN	NaN	NaN	NaN	0	NaN	NaN	NaN	NaN	NaN	NaN	NaN	NaN	NaN	0	NaN	#	#	#	#	#
#	1	1	#	1	1	1	#	0	#	NaN	NaN	NaN	NaN	NaN	NaN	NaN	NaN	NaN	NaN	NaN	NaN	NaN	1	NaN	NaN	NaN	NaN	0	NaN	NaN	NaN	NaN	NaN	NaN	NaN	NaN	NaN	NaN	1	#	#	#	#	#
#	1	1	#	1	1	1	#	0	#	NaN	NaN	NaN	NaN	NaN	NaN	NaN	NaN	NaN	NaN	NaN	NaN	NaN	1	NaN	NaN	NaN	NaN	NaN	1	0	NaN	NaN	NaN	NaN	NaN	NaN	NaN	NaN	NaN	#	#	#	#	#
#	1	1	#	1	1	1	#	0	#	NaN	NaN	NaN	NaN	NaN	NaN	NaN	NaN	NaN	NaN	NaN	NaN	NaN	1	NaN	NaN	NaN	NaN	NaN	1	NaN	0	NaN	NaN	NaN	NaN	NaN	NaN	NaN	NaN	#	#	#	#	#
#	1	1	#	1	1	1	#	0	#	NaN	NaN	NaN	NaN	NaN	NaN	NaN	NaN	NaN	NaN	NaN	NaN	NaN	1	NaN	NaN	NaN	NaN	NaN	1	NaN	NaN	0	NaN	NaN	NaN	NaN	NaN	NaN	NaN	#	#	#	#	#
#	1	1	#	1	1	1	#	0	#	NaN	NaN	NaN	NaN	NaN	NaN	NaN	NaN	NaN	NaN	NaN	NaN	NaN	1	NaN	NaN	NaN	NaN	NaN	1	NaN	NaN	NaN	0	NaN	NaN	NaN	NaN	NaN	NaN	#	#	#	#	#
#	1	1	#	1	1	1	#	0	#	NaN	NaN	NaN	NaN	NaN	NaN	NaN	NaN	NaN	NaN	NaN	NaN	NaN	1	NaN	NaN	NaN	NaN	NaN	1	NaN	NaN	NaN	NaN	1	NaN	NaN	NaN	NaN	NaN	#	#	#	#	#
#	1	1	#	1	1	1	#	0	#	NaN	NaN	NaN	NaN	NaN	NaN	NaN	NaN	NaN	NaN	NaN	NaN	NaN	1	NaN	NaN	NaN	NaN	NaN	1	NaN	NaN	NaN	NaN	NaN	1	NaN	NaN	NaN	NaN	#	#	#	#	#
#	1	1	#	1	1	1	#	0	#	NaN	NaN	NaN	NaN	NaN	NaN	NaN	NaN	NaN	NaN	NaN	NaN	NaN	1	NaN	NaN	NaN	NaN	NaN	1	NaN	NaN	NaN	NaN	NaN	NaN	0	NaN	NaN	NaN	#	#	#	#	#
#	1	1	#	1	1	1	#	0	#	NaN	NaN	NaN	NaN	NaN	NaN	NaN	NaN	NaN	NaN	NaN	NaN	NaN	1	NaN	NaN	NaN	NaN	NaN	1	NaN	NaN	NaN	NaN	NaN	NaN	NaN	0	NaN	NaN	#	#	#	#	#
#	1	1	#	1	1	1	#	0	#	NaN	NaN	NaN	NaN	NaN	NaN	NaN	NaN	NaN	NaN	NaN	NaN	NaN	1	NaN	NaN	NaN	NaN	NaN	1	NaN	NaN	NaN	NaN	NaN	NaN	NaN	NaN	0	NaN	#	#	#	#	#
#	1	1	#	1	1	1	#	0	#	NaN	NaN	NaN	NaN	NaN	NaN	NaN	NaN	NaN	NaN	NaN	NaN	NaN	1	NaN	NaN	NaN	NaN	NaN	1	NaN	NaN	NaN	NaN	NaN	NaN	NaN	NaN	NaN	1	#	#	#	#	#
#	1	1	#	1	1	1	#	0	#	NaN	NaN	NaN	NaN	NaN	NaN	NaN	NaN	NaN	NaN	NaN	NaN	NaN	1	NaN	NaN	NaN	NaN	NaN	NaN	0	0	NaN	NaN	NaN	NaN	NaN	NaN	NaN	NaN	#	#	#	#	#
#	1	1	#	1	1	1	#	0	#	NaN	NaN	NaN	NaN	NaN	NaN	NaN	NaN	NaN	NaN	NaN	NaN	NaN	1	NaN	NaN	NaN	NaN	NaN	NaN	0	NaN	0	NaN	NaN	NaN	NaN	NaN	NaN	NaN	#	#	#	#	#
#	1	1	#	1	1	1	#	0	#	NaN	NaN	NaN	NaN	NaN	NaN	NaN	NaN	NaN	NaN	NaN	NaN	NaN	1	NaN	NaN	NaN	NaN	NaN	NaN	0	NaN	NaN	0	NaN	NaN	NaN	NaN	NaN	NaN	#	#	#	#	#
#	1	1	#	1	1	1	#	0	#	NaN	NaN	NaN	NaN	NaN	NaN	NaN	NaN	NaN	NaN	NaN	NaN	NaN	1	NaN	NaN	NaN	NaN	NaN	NaN	0	NaN	NaN	NaN	1	NaN	NaN	NaN	NaN	NaN	#	#	#	#	#
#	1	1	#	1	1	1	#	0	#	NaN	NaN	NaN	NaN	NaN	NaN	NaN	NaN	NaN	NaN	NaN	NaN	NaN	1	NaN	NaN	NaN	NaN	NaN	NaN	0	NaN	NaN	NaN	NaN	1	NaN	NaN	NaN	NaN	#	#	#	#	#
#	1	1	#	1	1	1	#	0	#	NaN	NaN	NaN	NaN	NaN	NaN	NaN	NaN	NaN	NaN	NaN	NaN	NaN	1	NaN	NaN	NaN	NaN	NaN	NaN	0	NaN	NaN	NaN	NaN	NaN	0	NaN	NaN	NaN	#	#	#	#	#
#	1	1	#	1	1	1	#	0	#	NaN	NaN	NaN	NaN	NaN	NaN	NaN	NaN	NaN	NaN	NaN	NaN	NaN	1	NaN	NaN	NaN	NaN	NaN	NaN	0	NaN	NaN	NaN	NaN	NaN	NaN	0	NaN	NaN	#	#	#	#	#
#	1	1	#	1	1	1	#	0	#	NaN	NaN	NaN	NaN	NaN	NaN	NaN	NaN	NaN	NaN	NaN	NaN	NaN	1	NaN	NaN	NaN	NaN	NaN	NaN	0	NaN	NaN	NaN	NaN	NaN	NaN	NaN	0	NaN	#	#	#	#	#
#	1	1	#	1	1	1	#	0	#	NaN	NaN	NaN	NaN	NaN	NaN	NaN	NaN	NaN	NaN	NaN	NaN	NaN	1	NaN	NaN	NaN	NaN	NaN	NaN	0	NaN	NaN	NaN	NaN	NaN	NaN	NaN	NaN	1	#	#	#	#	#
#	1	1	#	1	1	1	#	0	#	NaN	NaN	NaN	NaN	NaN	NaN	NaN	NaN	NaN	NaN	NaN	NaN	NaN	1	NaN	NaN	NaN	NaN	NaN	NaN	NaN	0	0	NaN	NaN	NaN	NaN	NaN	NaN	NaN	#	#	#	#	#
#	1	1	#	1	1	1	#	0	#	NaN	NaN	NaN	NaN	NaN	NaN	NaN	NaN	NaN	NaN	NaN	NaN	NaN	1	NaN	NaN	NaN	NaN	NaN	NaN	NaN	0	NaN	0	NaN	NaN	NaN	NaN	NaN	NaN	#	#	#	#	#
#	1	1	#	1	1	1	#	0	#	NaN	NaN	NaN	NaN	NaN	NaN	NaN	NaN	NaN	NaN	NaN	NaN	NaN	1	NaN	NaN	NaN	NaN	NaN	NaN	NaN	0	NaN	NaN	1	NaN	NaN	NaN	NaN	NaN	#	#	#	#	#
#	1	1	#	1	1	1	#	0	#	NaN	NaN	NaN	NaN	NaN	NaN	NaN	NaN	NaN	NaN	NaN	NaN	NaN	1	NaN	NaN	NaN	NaN	NaN	NaN	NaN	0	NaN	NaN	NaN	1	NaN	NaN	NaN	NaN	#	#	#	#	#
#	1	1	#	1	1	1	#	0	#	NaN	NaN	NaN	NaN	NaN	NaN	NaN	NaN	NaN	NaN	NaN	NaN	NaN	1	NaN	NaN	NaN	NaN	NaN	NaN	NaN	0	NaN	NaN	NaN	NaN	0	NaN	NaN	NaN	#	#	#	#	#
#	1	1	#	1	1	1	#	0	#	NaN	NaN	NaN	NaN	NaN	NaN	NaN	NaN	NaN	NaN	NaN	NaN	NaN	1	NaN	NaN	NaN	NaN	NaN	NaN	NaN	0	NaN	NaN	NaN	NaN	NaN	0	NaN	NaN	#	#	#	#	#
#	1	1	#	1	1	1	#	0	#	NaN	NaN	NaN	NaN	NaN	NaN	NaN	NaN	NaN	NaN	NaN	NaN	NaN	1	NaN	NaN	NaN	NaN	NaN	NaN	NaN	0	NaN	NaN	NaN	NaN	NaN	NaN	0	NaN	#	#	#	#	#
#	1	1	#	1	1	1	#	0	#	NaN	NaN	NaN	NaN	NaN	NaN	NaN	NaN	NaN	NaN	NaN	NaN	NaN	1	NaN	NaN	NaN	NaN	NaN	NaN	NaN	0	NaN	NaN	NaN	NaN	NaN	NaN	NaN	1	#	#	#	#	#
#	1	1	#	1	1	1	#	0	#	NaN	NaN	NaN	NaN	NaN	NaN	NaN	NaN	NaN	NaN	NaN	NaN	NaN	1	NaN	NaN	NaN	NaN	NaN	NaN	NaN	NaN	0	0	NaN	NaN	NaN	NaN	NaN	NaN	#	#	#	#	#
#	1	1	#	1	1	1	#	0	#	NaN	NaN	NaN	NaN	NaN	NaN	NaN	NaN	NaN	NaN	NaN	NaN	NaN	1	NaN	NaN	NaN	NaN	NaN	NaN	NaN	NaN	0	NaN	1	NaN	NaN	NaN	NaN	NaN	#	#	#	#	#
#	1	1	#	1	1	1	#	0	#	NaN	NaN	NaN	NaN	NaN	NaN	NaN	NaN	NaN	NaN	NaN	NaN	NaN	1	NaN	NaN	NaN	NaN	NaN	NaN	NaN	NaN	0	NaN	NaN	1	NaN	NaN	NaN	NaN	#	#	#	#	#
#	1	1	#	1	1	1	#	0	#	NaN	NaN	NaN	NaN	NaN	NaN	NaN	NaN	NaN	NaN	NaN	NaN	NaN	1	NaN	NaN	NaN	NaN	NaN	NaN	NaN	NaN	0	NaN	NaN	NaN	0	NaN	NaN	NaN	#	#	#	#	#
#	1	1	#	1	1	1	#	0	#	NaN	NaN	NaN	NaN	NaN	NaN	NaN	NaN	NaN	NaN	NaN	NaN	NaN	1	NaN	NaN	NaN	NaN	NaN	NaN	NaN	NaN	0	NaN	NaN	NaN	NaN	0	NaN	NaN	#	#	#	#	#
#	1	1	#	1	1	1	#	0	#	NaN	NaN	NaN	NaN	NaN	NaN	NaN	NaN	NaN	NaN	NaN	NaN	NaN	1	NaN	NaN	NaN	NaN	NaN	NaN	NaN	NaN	0	NaN	NaN	NaN	NaN	NaN	0	NaN	#	#	#	#	#
#	1	1	#	1	1	1	#	0	#	NaN	NaN	NaN	NaN	NaN	NaN	NaN	NaN	NaN	NaN	NaN	NaN	NaN	1	NaN	NaN	NaN	NaN	NaN	NaN	NaN	NaN	0	NaN	NaN	NaN	NaN	NaN	NaN	1	#	#	#	#	#
#	1	1	#	1	1	1	#	0	#	NaN	NaN	NaN	NaN	NaN	NaN	NaN	NaN	NaN	NaN	NaN	NaN	NaN	1	NaN	NaN	NaN	NaN	NaN	NaN	NaN	NaN	NaN	0	1	NaN	NaN	NaN	NaN	NaN	#	#	#	#	#
#	1	1	#	1	1	1	#	0	#	NaN	NaN	NaN	NaN	NaN	NaN	NaN	NaN	NaN	NaN	NaN	NaN	NaN	1	NaN	NaN	NaN	NaN	NaN	NaN	NaN	NaN	NaN	0	NaN	1	NaN	NaN	NaN	NaN	#	#	#	#	#
#	1	1	#	1	1	1	#	0	#	NaN	NaN	NaN	NaN	NaN	NaN	NaN	NaN	NaN	NaN	NaN	NaN	NaN	1	NaN	NaN	NaN	NaN	NaN	NaN	NaN	NaN	NaN	0	NaN	NaN	0	NaN	NaN	NaN	#	#	#	#	#
#	1	1	#	1	1	1	#	0	#	NaN	NaN	NaN	NaN	NaN	NaN	NaN	NaN	NaN	NaN	NaN	NaN	NaN	1	NaN	NaN	NaN	NaN	NaN	NaN	NaN	NaN	NaN	0	NaN	NaN	NaN	0	NaN	NaN	#	#	#	#	#
#	1	1	#	1	1	1	#	0	#	NaN	NaN	NaN	NaN	NaN	NaN	NaN	NaN	NaN	NaN	NaN	NaN	NaN	1	NaN	NaN	NaN	NaN	NaN	NaN	NaN	NaN	NaN	0	NaN	NaN	NaN	NaN	0	NaN	#	#	#	#	#
#	1	1	#	1	1	1	#	0	#	NaN	NaN	NaN	NaN	NaN	NaN	NaN	NaN	NaN	NaN	NaN	NaN	NaN	1	NaN	NaN	NaN	NaN	NaN	NaN	NaN	NaN	NaN	0	NaN	NaN	NaN	NaN	NaN	1	#	#	#	#	#
#	1	1	#	1	1	1	#	0	#	NaN	NaN	NaN	NaN	NaN	NaN	NaN	NaN	NaN	NaN	NaN	NaN	NaN	1	NaN	NaN	NaN	NaN	NaN	NaN	NaN	NaN	NaN	NaN	1	1	NaN	NaN	NaN	NaN	#	#	#	#	#
#	1	1	#	1	1	1	#	0	#	NaN	NaN	NaN	NaN	NaN	NaN	NaN	NaN	NaN	NaN	NaN	NaN	NaN	1	NaN	NaN	NaN	NaN	NaN	NaN	NaN	NaN	NaN	NaN	1	NaN	0	NaN	NaN	NaN	#	#	#	#	#
#	1	1	#	1	1	1	#	0	#	NaN	NaN	NaN	NaN	NaN	NaN	NaN	NaN	NaN	NaN	NaN	NaN	NaN	1	NaN	NaN	NaN	NaN	NaN	NaN	NaN	NaN	NaN	NaN	1	NaN	NaN	0	NaN	NaN	#	#	#	#	#
#	1	1	#	1	1	1	#	0	#	NaN	NaN	NaN	NaN	NaN	NaN	NaN	NaN	NaN	NaN	NaN	NaN	NaN	1	NaN	NaN	NaN	NaN	NaN	NaN	NaN	NaN	NaN	NaN	1	NaN	NaN	NaN	0	NaN	#	#	#	#	#
#	1	1	#	1	1	1	#	0	#	NaN	NaN	NaN	NaN	NaN	NaN	NaN	NaN	NaN	NaN	NaN	NaN	NaN	1	NaN	NaN	NaN	NaN	NaN	NaN	NaN	NaN	NaN	NaN	1	NaN	NaN	NaN	NaN	1	#	#	#	#	#
#	1	1	#	1	1	1	#	0	#	NaN	NaN	NaN	NaN	NaN	NaN	NaN	NaN	NaN	NaN	NaN	NaN	NaN	1	NaN	NaN	NaN	NaN	NaN	NaN	NaN	NaN	NaN	NaN	NaN	1	0	NaN	NaN	NaN	#	#	#	#	#
#	1	1	#	1	1	1	#	0	#	NaN	NaN	NaN	NaN	NaN	NaN	NaN	NaN	NaN	NaN	NaN	NaN	NaN	1	NaN	NaN	NaN	NaN	NaN	NaN	NaN	NaN	NaN	NaN	NaN	1	NaN	0	NaN	NaN	#	#	#	#	#
#	1	1	#	1	1	1	#	0	#	NaN	NaN	NaN	NaN	NaN	NaN	NaN	NaN	NaN	NaN	NaN	NaN	NaN	1	NaN	NaN	NaN	NaN	NaN	NaN	NaN	NaN	NaN	NaN	NaN	1	NaN	NaN	0	NaN	#	#	#	#	#
#	1	1	#	1	1	1	#	0	#	NaN	NaN	NaN	NaN	NaN	NaN	NaN	NaN	NaN	NaN	NaN	NaN	NaN	1	NaN	NaN	NaN	NaN	NaN	NaN	NaN	NaN	NaN	NaN	NaN	1	NaN	NaN	NaN	1	#	#	#	#	#
#	1	1	#	1	1	1	#	0	#	NaN	NaN	NaN	NaN	NaN	NaN	NaN	NaN	NaN	NaN	NaN	NaN	NaN	1	NaN	NaN	NaN	NaN	NaN	NaN	NaN	NaN	NaN	NaN	NaN	NaN	0	0	NaN	NaN	#	#	#	#	#
#	1	1	#	1	1	1	#	0	#	NaN	NaN	NaN	NaN	NaN	NaN	NaN	NaN	NaN	NaN	NaN	NaN	NaN	1	NaN	NaN	NaN	NaN	NaN	NaN	NaN	NaN	NaN	NaN	NaN	NaN	0	NaN	0	NaN	#	#	#	#	#
#	1	1	#	1	1	1	#	0	#	NaN	NaN	NaN	NaN	NaN	NaN	NaN	NaN	NaN	NaN	NaN	NaN	NaN	1	NaN	NaN	NaN	NaN	NaN	NaN	NaN	NaN	NaN	NaN	NaN	NaN	0	NaN	NaN	1	#	#	#	#	#
#	1	1	#	1	1	1	#	0	#	NaN	NaN	NaN	NaN	NaN	NaN	NaN	NaN	NaN	NaN	NaN	NaN	NaN	1	NaN	NaN	NaN	NaN	NaN	NaN	NaN	NaN	NaN	NaN	NaN	NaN	NaN	0	0	NaN	#	#	#	#	#
#	1	1	#	1	1	1	#	0	#	NaN	NaN	NaN	NaN	NaN	NaN	NaN	NaN	NaN	NaN	NaN	NaN	NaN	1	NaN	NaN	NaN	NaN	NaN	NaN	NaN	NaN	NaN	NaN	NaN	NaN	NaN	0	NaN	1	#	#	#	#	#
#	1	1	#	1	1	1	#	0	#	NaN	NaN	NaN	NaN	NaN	NaN	NaN	NaN	NaN	NaN	NaN	NaN	NaN	1	NaN	NaN	NaN	NaN	NaN	NaN	NaN	NaN	NaN	NaN	NaN	NaN	NaN	NaN	0	1	#	#	#	#	#

## Sheet: Double_perturbation_out
Input										Regulatory network																																		Output
AR	ESR1	FGFR1	FLT4	NR2F2	NR4A1	TGFBR1	TGFBR2	THRA	THRB	CCNB1	CDK1	PPP2R1B	CDC20	CCNA2	PPP2R2A	CCNE2	CDKN2A	RB1	BCL2	CDK2	PPP2R1A	E2F2	MDM4	PPP2R2D	E2F3	KIAA1524	E2F1	MDM2	TP53	MYC	SP1	LEF1	AXIN2	hsa-miR-205-5p	AKT1	hsa-miR-25-3p	CTNNB1	SIRT1	FOXO3	VIM	ZEB1	CDH1	SNAI1	EMT
NaN	1	1	NaN	1	1	1	NaN	0	NaN	1	1	1	1	1	1	1	1	1	1	1	0	1	1	0	NaN	1	1	1	0	1	1	1	1	0	0	1	1	1	0	0	1	0	1	3
NaN	1	1	NaN	1	1	1	NaN	0	NaN	1	1	1	1	1	1	1	1	1	1	1	0	1	1	0	NaN	1	1	1	0	1	1	1	1	0	0	1	1	1	0	0	1	0	1	3
NaN	1	1	NaN	1	1	1	NaN	0	NaN	0	0	1	0	1	1	1	1	1	1	1	0	1	1	0	NaN	1	1	1	0	1	1	1	1	0	0	1	1	1	0	1	1	0	1	4
NaN	1	1	NaN	1	1	1	NaN	0	NaN	0	1	0	1	1	1	1	1	1	1	1	0	1	1	0	NaN	1	1	1	0	1	1	1	1	0	1	1	1	1	0	1	1	0	1	4
NaN	1	1	NaN	1	1	1	NaN	0	NaN	0	1	1	0	1	1	1	1	1	1	1	0	1	1	0	NaN	1	1	1	0	1	1	1	1	0	0	1	1	1	0	0	1	0	1	3
NaN	1	1	NaN	1	1	1	NaN	0	NaN	0	1	1	1	0	1	1	1	1	1	1	0	1	1	0	NaN	1	1	1	0	1	1	1	1	0	0	1	1	1	0	0	1	0	1	3
NaN	1	1	NaN	1	1	1	NaN	0	NaN	0	1	1	1	1	0	1	1	1	1	1	0	1	1	0	NaN	1	1	1	0	1	1	1	1	0	1	1	1	1	0	1	1	0	1	4
NaN	1	1	NaN	1	1	1	NaN	0	NaN	0	1	1	1	1	1	0	1	1	1	1	0	1	1	0	NaN	1	1	1	0	1	1	1	1	0	0	1	1	1	0	0	1	0	1	3
NaN	1	1	NaN	1	1	1	NaN	0	NaN	0	1	1	1	1	1	1	0	1	1	1	0	1	1	0	NaN	1	1	1	0	1	1	1	1	0	0	1	1	1	0	0	1	0	1	3
NaN	1	1	NaN	1	1	1	NaN	0	NaN	0	1	1	1	1	1	1	1	0	1	1	0	1	1	0	NaN	1	1	1	0	1	1	1	1	0	0	1	1	1	0	0	1	0	1	3
NaN	1	1	NaN	1	1	1	NaN	0	NaN	0	1	1	1	1	1	1	1	1	0	1	0	1	1	0	NaN	1	1	1	1	1	1	1	1	1	0	1	1	1	1	0	1	0	1	3
NaN	1	1	NaN	1	1	1	NaN	0	NaN	0	1	1	1	1	1	1	1	1	1	0	0	1	1	0	NaN	1	1	1	0	1	1	1	1	0	0	1	1	1	0	0	1	0	1	3
NaN	1	1	NaN	1	1	1	NaN	0	NaN	0	1	1	1	1	1	1	1	1	1	1	1	1	1	0	NaN	1	1	1	0	1	1	1	1	0	0	1	1	1	0	0	1	0	1	3
NaN	1	1	NaN	1	1	1	NaN	0	NaN	0	1	1	1	1	1	1	1	1	1	1	0	0	1	0	NaN	1	1	1	0	1	1	1	1	0	0	1	1	1	0	0	1	0	1	3
NaN	1	1	NaN	1	1	1	NaN	0	NaN	0	1	1	1	1	1	1	1	1	1	1	0	1	0	0	NaN	1	1	0	1	1	1	0	1	1	0	1	0	1	1	0	1	1	0	1
NaN	1	1	NaN	1	1	1	NaN	0	NaN	0	1	1	1	1	1	1	1	1	1	1	0	1	1	1	NaN	1	1	1	0	1	1	1	1	0	0	1	1	1	0	0	1	0	1	3
NaN	1	1	NaN	1	1	1	NaN	0	NaN	0	1	1	1	1	1	1	1	1	1	1	0	1	1	0	NaN	1	1	1	0	1	1	1	1	0	0	1	1	1	0	0	1	0	1	3
NaN	1	1	NaN	1	1	1	NaN	0	NaN	0	1	1	1	1	1	1	1	1	1	1	1	1	1	1	NaN	0	1	1	0	1	1	1	1	0	0	1	1	1	0	0	1	0	1	3
NaN	1	1	NaN	1	1	1	NaN	0	NaN	0	NaN	1	NaN	NaN	1	NaN	1	1	NaN	NaN	NaN	NaN	1	NaN	NaN	NaN	0	1	1	NaN	0	NaN	NaN	1	0	0	NaN	0	1	NaN	0	1	NaN	#VALUE!
NaN	1	1	NaN	1	1	1	NaN	0	NaN	0	1	1	1	1	1	1	1	1	1	1	0	1	1	0	NaN	1	1	0	1	1	1	0	1	1	0	1	0	1	1	0	1	1	0	1
NaN	1	1	NaN	1	1	1	NaN	0	NaN	0	1	1	1	1	1	1	1	1	1	1	0	1	1	0	NaN	1	1	1	1	1	1	1	1	1	0	1	1	1	1	0	1	0	1	3
NaN	1	1	NaN	1	1	1	NaN	0	NaN	0	1	1	1	1	1	1	1	1	1	1	0	1	1	0	NaN	1	1	1	0	0	1	1	1	0	0	1	1	1	0	0	1	0	1	3
NaN	1	1	NaN	1	1	1	NaN	0	NaN	0	1	1	1	1	1	1	1	1	1	1	0	1	1	0	NaN	1	1	1	0	1	0	1	1	0	0	1	1	1	0	0	1	0	1	3
NaN	1	1	NaN	1	1	1	NaN	0	NaN	0	1	1	1	1	1	1	1	1	1	1	0	1	1	0	NaN	1	1	1	0	1	1	0	1	0	0	1	1	1	0	0	1	0	1	3
NaN	1	1	NaN	1	1	1	NaN	0	NaN	0	1	1	1	1	1	1	1	1	1	1	0	1	1	0	NaN	1	1	1	0	1	1	1	0	0	0	1	1	1	0	0	1	0	1	3
NaN	1	1	NaN	1	1	1	NaN	0	NaN	0	1	1	1	1	1	1	1	1	1	1	0	1	1	0	NaN	1	1	1	0	1	1	1	1	1	0	1	1	1	0	0	1	0	1	3
NaN	1	1	NaN	1	1	1	NaN	0	NaN	0	1	1	1	1	1	1	1	1	1	1	0	1	1	0	NaN	1	1	1	0	1	1	1	1	0	1	1	1	1	0	1	1	0	1	4
NaN	1	1	NaN	1	1	1	NaN	0	NaN	0	1	1	1	1	1	1	1	1	1	1	0	1	1	0	NaN	1	1	1	1	1	1	0	1	1	0	0	0	1	1	0	1	1	0	1
NaN	1	1	NaN	1	1	1	NaN	0	NaN	0	1	1	1	1	1	1	1	1	1	1	0	1	1	0	NaN	1	1	1	0	1	1	0	1	0	0	1	0	1	0	0	1	0	0	2
NaN	1	1	NaN	1	1	1	NaN	0	NaN	0	1	1	1	1	1	1	1	1	1	1	0	1	1	0	NaN	1	1	1	1	1	1	1	1	1	0	1	1	0	1	0	1	0	1	3
NaN	1	1	NaN	1	1	1	NaN	0	NaN	0	1	1	1	1	1	1	1	1	1	1	0	1	1	0	NaN	1	1	1	0	1	1	1	1	0	0	1	1	1	1	0	1	0	1	3
NaN	1	1	NaN	1	1	1	NaN	0	NaN	1	0	0	1	1	1	1	1	1	1	1	0	1	1	0	NaN	1	1	1	0	1	1	1	1	0	1	1	1	1	0	1	1	0	1	4
NaN	1	1	NaN	1	1	1	NaN	0	NaN	1	0	1	0	1	1	1	1	1	1	1	0	1	1	0	NaN	1	1	1	0	1	1	1	1	0	0	1	1	1	0	1	1	0	1	4
NaN	1	1	NaN	1	1	1	NaN	0	NaN	1	0	1	1	0	1	1	1	1	1	1	0	1	1	0	NaN	1	1	1	0	1	1	1	1	0	0	1	1	1	0	1	1	0	1	4
NaN	1	1	NaN	1	1	1	NaN	0	NaN	1	0	1	1	1	0	1	1	1	1	1	0	1	1	0	NaN	1	1	1	0	1	1	1	1	0	1	1	1	1	0	1	1	0	1	4
NaN	1	1	NaN	1	1	1	NaN	0	NaN	1	0	1	1	1	1	0	1	1	1	1	0	1	1	0	NaN	1	1	1	0	1	1	1	1	0	0	1	1	1	0	1	1	0	1	4
NaN	1	1	NaN	1	1	1	NaN	0	NaN	1	0	1	1	1	1	1	0	1	1	1	0	1	1	0	NaN	1	1	1	0	1	1	1	1	0	0	1	1	1	0	1	1	0	1	4
NaN	1	1	NaN	1	1	1	NaN	0	NaN	1	0	1	1	1	1	1	1	0	1	1	0	1	1	0	NaN	1	1	1	0	1	1	1	1	0	0	1	1	1	0	1	1	0	1	4
NaN	1	1	NaN	1	1	1	NaN	0	NaN	1	0	1	1	1	1	1	1	1	0	1	0	1	1	0	NaN	1	1	1	1	1	1	1	1	1	0	1	1	1	1	1	1	0	1	4
NaN	1	1	NaN	1	1	1	NaN	0	NaN	1	0	1	1	1	1	1	1	1	1	0	0	1	1	0	NaN	1	1	1	0	1	1	1	1	0	0	1	1	1	0	1	1	0	1	4
NaN	1	1	NaN	1	1	1	NaN	0	NaN	1	0	1	1	1	1	1	1	1	1	1	1	1	1	0	NaN	1	1	1	0	1	1	1	1	0	0	1	1	1	0	1	1	0	1	4
NaN	1	1	NaN	1	1	1	NaN	0	NaN	1	0	1	1	1	1	1	1	1	1	1	0	0	1	0	NaN	1	1	1	0	1	1	1	1	0	0	1	1	1	0	1	1	0	1	4
NaN	1	1	NaN	1	1	1	NaN	0	NaN	1	0	1	1	1	1	1	1	1	1	1	0	1	0	0	NaN	1	1	0	1	1	1	0	1	1	0	1	0	1	1	1	1	1	0	2
NaN	1	1	NaN	1	1	1	NaN	0	NaN	1	0	1	1	1	1	1	1	1	1	1	0	1	1	1	NaN	1	1	1	0	1	1	1	1	0	0	1	1	1	0	1	1	0	1	4
NaN	1	1	NaN	1	1	1	NaN	0	NaN	1	0	1	1	1	1	1	1	1	1	1	0	1	1	0	NaN	1	1	1	0	1	1	1	1	0	0	1	1	1	0	1	1	0	1	4
NaN	1	1	NaN	1	1	1	NaN	0	NaN	1	0	1	1	1	1	1	1	1	1	1	1	1	1	1	NaN	0	1	1	0	1	1	1	1	0	0	1	1	1	0	1	1	0	1	4
NaN	1	1	NaN	1	1	1	NaN	0	NaN	NaN	0	1	NaN	NaN	1	NaN	1	1	NaN	NaN	NaN	NaN	1	NaN	NaN	NaN	0	1	1	NaN	0	NaN	NaN	1	0	0	NaN	0	1	1	0	1	NaN	#VALUE!
NaN	1	1	NaN	1	1	1	NaN	0	NaN	1	0	1	1	1	1	1	1	1	1	1	0	1	1	0	NaN	1	1	0	1	1	1	0	1	1	0	1	0	1	1	1	1	1	0	2
NaN	1	1	NaN	1	1	1	NaN	0	NaN	1	0	1	1	1	1	1	1	1	1	1	0	1	1	0	NaN	1	1	1	1	1	1	1	1	1	0	1	1	1	1	1	1	0	1	4
NaN	1	1	NaN	1	1	1	NaN	0	NaN	1	0	1	1	1	1	1	1	1	1	1	0	1	1	0	NaN	1	1	1	0	0	1	1	1	0	0	1	1	1	0	1	1	0	1	4
NaN	1	1	NaN	1	1	1	NaN	0	NaN	1	0	1	1	1	1	1	1	1	1	1	0	1	1	0	NaN	1	1	1	0	1	0	1	1	0	0	1	1	1	0	1	1	0	1	4
NaN	1	1	NaN	1	1	1	NaN	0	NaN	1	0	1	1	1	1	1	1	1	1	1	0	1	1	0	NaN	1	1	1	0	1	1	0	1	0	0	1	1	1	0	1	1	0	1	4
NaN	1	1	NaN	1	1	1	NaN	0	NaN	1	0	1	1	1	1	1	1	1	1	1	0	1	1	0	NaN	1	1	1	0	1	1	1	0	0	0	1	1	1	0	1	1	0	1	4
NaN	1	1	NaN	1	1	1	NaN	0	NaN	1	0	1	1	1	1	1	1	1	1	1	0	1	1	0	NaN	1	1	1	0	1	1	1	1	1	0	1	1	1	0	1	1	0	1	4
NaN	1	1	NaN	1	1	1	NaN	0	NaN	1	0	1	1	1	1	1	1	1	1	1	0	1	1	0	NaN	1	1	1	0	1	1	1	1	0	1	1	1	1	0	1	1	0	1	4
NaN	1	1	NaN	1	1	1	NaN	0	NaN	1	0	1	1	1	1	1	1	1	1	1	0	1	1	0	NaN	1	1	1	1	1	1	0	1	1	0	0	0	1	1	1	1	1	0	2
NaN	1	1	NaN	1	1	1	NaN	0	NaN	1	0	1	1	1	1	1	1	1	1	1	0	1	1	0	NaN	1	1	1	0	1	1	0	1	0	0	1	0	1	0	1	1	0	0	3
NaN	1	1	NaN	1	1	1	NaN	0	NaN	1	0	1	1	1	1	1	1	1	1	1	0	1	1	0	NaN	1	1	1	1	1	1	1	1	1	0	1	1	0	1	1	1	0	1	4
NaN	1	1	NaN	1	1	1	NaN	0	NaN	1	0	1	1	1	1	1	1	1	1	1	0	1	1	0	NaN	1	1	1	0	1	1	1	1	0	0	1	1	1	1	1	1	0	1	4
NaN	1	1	NaN	1	1	1	NaN	0	NaN	1	1	0	0	1	1	1	1	1	1	1	0	1	1	0	NaN	1	1	1	0	1	1	1	1	0	1	1	1	1	0	1	1	0	1	4
NaN	1	1	NaN	1	1	1	NaN	0	NaN	1	1	0	1	0	1	1	1	1	1	1	0	1	1	0	NaN	1	1	1	0	1	1	1	1	0	1	1	1	1	0	1	1	0	1	4
NaN	1	1	NaN	1	1	1	NaN	0	NaN	1	1	0	1	1	0	1	1	1	1	1	0	1	1	0	NaN	1	1	1	0	1	1	1	1	0	1	1	1	1	0	1	1	0	1	4
NaN	1	1	NaN	1	1	1	NaN	0	NaN	1	1	0	1	1	1	0	1	1	1	1	0	1	1	0	NaN	1	1	1	0	1	1	1	1	0	1	1	1	1	0	1	1	0	1	4
NaN	1	1	NaN	1	1	1	NaN	0	NaN	1	1	0	1	1	1	1	0	1	1	1	0	1	1	0	NaN	1	1	1	0	1	1	1	1	0	1	1	1	1	0	1	1	0	1	4
NaN	1	1	NaN	1	1	1	NaN	0	NaN	1	1	0	1	1	1	1	1	0	1	1	0	1	1	0	NaN	1	1	1	0	1	1	1	1	0	1	1	1	1	0	1	1	0	1	4
NaN	1	1	NaN	1	1	1	NaN	0	NaN	1	1	0	1	1	1	1	1	1	0	1	0	1	1	0	NaN	1	1	1	1	1	1	1	1	1	1	1	1	1	1	1	1	0	1	4
NaN	1	1	NaN	1	1	1	NaN	0	NaN	1	1	0	1	1	1	1	1	1	1	0	0	1	1	0	NaN	1	1	1	0	1	1	1	1	0	1	1	1	1	0	1	1	0	1	4
NaN	1	1	NaN	1	1	1	NaN	0	NaN	1	1	0	1	1	1	1	1	1	1	1	1	1	1	0	NaN	1	1	1	0	1	1	1	1	0	1	1	1	1	0	1	1	0	1	4
NaN	1	1	NaN	1	1	1	NaN	0	NaN	1	1	0	1	1	1	1	1	1	1	1	0	0	1	0	NaN	1	1	1	0	1	1	1	1	0	1	1	1	1	0	1	1	0	1	4
NaN	1	1	NaN	1	1	1	NaN	0	NaN	1	1	0	1	1	1	1	1	1	1	1	0	1	0	0	NaN	1	1	0	1	1	1	0	1	1	1	1	0	1	1	1	1	1	0	2
NaN	1	1	NaN	1	1	1	NaN	0	NaN	1	1	0	1	1	1	1	1	1	1	1	0	1	1	1	NaN	1	1	1	0	1	1	1	1	0	1	1	1	1	0	1	1	0	1	4
NaN	1	1	NaN	1	1	1	NaN	0	NaN	1	1	0	1	1	1	1	1	1	1	1	0	1	1	0	NaN	1	1	1	0	1	1	1	1	0	1	1	1	1	0	1	1	0	1	4
NaN	1	1	NaN	1	1	1	NaN	0	NaN	1	1	0	1	1	1	1	1	1	1	1	1	1	1	1	NaN	0	1	1	0	1	1	1	1	0	1	1	1	1	0	1	1	0	1	4
NaN	1	1	NaN	1	1	1	NaN	0	NaN	NaN	NaN	0	NaN	NaN	1	NaN	1	1	NaN	NaN	NaN	NaN	1	NaN	NaN	NaN	0	1	1	1	0	NaN	NaN	1	1	0	NaN	0	1	1	0	1	NaN	#VALUE!
NaN	1	1	NaN	1	1	1	NaN	0	NaN	1	1	0	1	1	1	1	1	1	1	1	0	1	1	0	NaN	1	1	0	1	1	1	0	1	1	1	1	0	1	1	1	1	1	0	2
NaN	1	1	NaN	1	1	1	NaN	0	NaN	1	1	0	1	1	1	1	1	1	1	1	0	1	1	0	NaN	1	1	1	1	1	1	1	1	1	1	1	1	1	1	1	1	0	1	4
NaN	1	1	NaN	1	1	1	NaN	0	NaN	1	1	0	1	1	1	1	1	1	1	1	0	1	1	0	NaN	1	1	1	0	0	1	1	1	0	1	1	1	1	0	1	1	0	1	4
NaN	1	1	NaN	1	1	1	NaN	0	NaN	1	1	0	1	1	1	1	1	1	1	1	0	1	1	0	NaN	1	1	1	0	1	0	1	1	0	1	1	1	1	0	1	1	0	1	4
NaN	1	1	NaN	1	1	1	NaN	0	NaN	1	1	0	1	1	1	1	1	1	1	1	0	1	1	0	NaN	1	1	1	0	1	1	0	1	0	1	1	1	1	0	1	1	0	1	4
NaN	1	1	NaN	1	1	1	NaN	0	NaN	1	1	0	1	1	1	1	1	1	1	1	0	1	1	0	NaN	1	1	1	0	1	1	1	0	0	1	1	1	1	0	1	1	0	1	4
NaN	1	1	NaN	1	1	1	NaN	0	NaN	1	1	0	1	1	1	1	1	1	1	1	0	1	1	0	NaN	1	1	1	0	1	1	1	1	1	1	1	1	1	0	1	1	0	1	4
NaN	1	1	NaN	1	1	1	NaN	0	NaN	1	1	0	1	1	1	1	1	1	1	1	0	1	1	0	NaN	1	1	1	0	1	1	1	1	0	1	1	1	1	0	1	1	0	1	4
NaN	1	1	NaN	1	1	1	NaN	0	NaN	1	1	0	1	1	1	1	1	1	1	1	0	1	1	0	NaN	1	1	1	1	1	1	0	1	1	1	0	0	1	1	1	1	1	0	2
NaN	1	1	NaN	1	1	1	NaN	0	NaN	1	1	0	1	1	1	1	1	1	1	1	0	1	1	0	NaN	1	1	1	0	1	1	0	1	0	1	1	0	1	0	1	1	0	0	3
NaN	1	1	NaN	1	1	1	NaN	0	NaN	1	1	0	1	1	1	1	1	1	1	1	0	1	1	0	NaN	1	1	1	1	1	1	1	1	1	1	1	1	0	1	1	1	0	1	4
NaN	1	1	NaN	1	1	1	NaN	0	NaN	1	1	0	1	1	1	1	1	1	1	1	0	1	1	0	NaN	1	1	1	0	1	1	1	1	0	1	1	1	1	1	1	1	0	1	4
NaN	1	1	NaN	1	1	1	NaN	0	NaN	1	1	1	0	0	1	1	1	1	1	1	0	1	1	0	NaN	1	1	1	0	1	1	1	1	0	0	1	1	1	0	0	1	0	1	3
NaN	1	1	NaN	1	1	1	NaN	0	NaN	1	1	1	0	1	0	1	1	1	1	1	0	1	1	0	NaN	1	1	1	0	1	1	1	1	0	1	1	1	1	0	1	1	0	1	4
NaN	1	1	NaN	1	1	1	NaN	0	NaN	1	1	1	0	1	1	0	1	1	1	1	0	1	1	0	NaN	1	1	1	0	1	1	1	1	0	0	1	1	1	0	0	1	0	1	3
NaN	1	1	NaN	1	1	1	NaN	0	NaN	1	1	1	0	1	1	1	0	1	1	1	0	1	1	0	NaN	1	1	1	0	1	1	1	1	0	0	1	1	1	0	0	1	0	1	3
NaN	1	1	NaN	1	1	1	NaN	0	NaN	1	1	1	0	1	1	1	1	0	1	1	0	1	1	0	NaN	1	1	1	0	1	1	1	1	0	0	1	1	1	0	0	1	0	1	3
NaN	1	1	NaN	1	1	1	NaN	0	NaN	1	1	1	0	1	1	1	1	1	0	1	0	1	1	0	NaN	1	1	1	1	1	1	1	1	1	0	1	1	1	1	0	1	0	1	3
NaN	1	1	NaN	1	1	1	NaN	0	NaN	1	1	1	0	1	1	1	1	1	1	0	0	1	1	0	NaN	1	1	1	0	1	1	1	1	0	0	1	1	1	0	0	1	0	1	3
NaN	1	1	NaN	1	1	1	NaN	0	NaN	1	1	1	0	1	1	1	1	1	1	1	1	1	1	0	NaN	1	1	1	0	1	1	1	1	0	0	1	1	1	0	0	1	0	1	3
NaN	1	1	NaN	1	1	1	NaN	0	NaN	1	1	1	0	1	1	1	1	1	1	1	0	0	1	0	NaN	1	1	1	0	1	1	1	1	0	0	1	1	1	0	0	1	0	1	3
NaN	1	1	NaN	1	1	1	NaN	0	NaN	1	1	1	0	1	1	1	1	1	1	1	0	1	0	0	NaN	1	1	0	1	1	1	0	1	1	0	1	0	1	1	0	1	1	0	1
NaN	1	1	NaN	1	1	1	NaN	0	NaN	1	1	1	0	1	1	1	1	1	1	1	0	1	1	1	NaN	1	1	1	0	1	1	1	1	0	0	1	1	1	0	0	1	0	1	3
NaN	1	1	NaN	1	1	1	NaN	0	NaN	1	1	1	0	1	1	1	1	1	1	1	0	1	1	0	NaN	1	1	1	0	1	1	1	1	0	0	1	1	1	0	0	1	0	1	3
NaN	1	1	NaN	1	1	1	NaN	0	NaN	1	1	1	0	1	1	1	1	1	1	1	1	1	1	1	NaN	0	1	1	0	1	1	1	1	0	0	1	1	1	0	0	1	0	1	3
NaN	1	1	NaN	1	1	1	NaN	0	NaN	NaN	NaN	1	0	NaN	1	NaN	1	1	NaN	NaN	NaN	NaN	1	NaN	NaN	NaN	0	1	1	NaN	0	NaN	NaN	1	0	0	NaN	0	1	NaN	0	1	NaN	#VALUE!
NaN	1	1	NaN	1	1	1	NaN	0	NaN	1	1	1	0	1	1	1	1	1	1	1	0	1	1	0	NaN	1	1	0	1	1	1	0	1	1	0	1	0	1	1	0	1	1	0	1
NaN	1	1	NaN	1	1	1	NaN	0	NaN	1	1	1	0	1	1	1	1	1	1	1	0	1	1	0	NaN	1	1	1	1	1	1	1	1	1	0	1	1	1	1	0	1	0	1	3
NaN	1	1	NaN	1	1	1	NaN	0	NaN	1	1	1	0	1	1	1	1	1	1	1	0	1	1	0	NaN	1	1	1	0	0	1	1	1	0	0	1	1	1	0	0	1	0	1	3
NaN	1	1	NaN	1	1	1	NaN	0	NaN	1	1	1	0	1	1	1	1	1	1	1	0	1	1	0	NaN	1	1	1	0	1	0	1	1	0	0	1	1	1	0	0	1	0	1	3
NaN	1	1	NaN	1	1	1	NaN	0	NaN	1	1	1	0	1	1	1	1	1	1	1	0	1	1	0	NaN	1	1	1	0	1	1	0	1	0	0	1	1	1	0	0	1	0	1	3
NaN	1	1	NaN	1	1	1	NaN	0	NaN	1	1	1	0	1	1	1	1	1	1	1	0	1	1	0	NaN	1	1	1	0	1	1	1	0	0	0	1	1	1	0	0	1	0	1	3
NaN	1	1	NaN	1	1	1	NaN	0	NaN	1	1	1	0	1	1	1	1	1	1	1	0	1	1	0	NaN	1	1	1	0	1	1	1	1	1	0	1	1	1	0	0	1	0	1	3
NaN	1	1	NaN	1	1	1	NaN	0	NaN	1	1	1	0	1	1	1	1	1	1	1	0	1	1	0	NaN	1	1	1	0	1	1	1	1	0	1	1	1	1	0	1	1	0	1	4
NaN	1	1	NaN	1	1	1	NaN	0	NaN	1	1	1	0	1	1	1	1	1	1	1	0	1	1	0	NaN	1	1	1	1	1	1	0	1	1	0	0	0	1	1	0	1	1	0	1
NaN	1	1	NaN	1	1	1	NaN	0	NaN	1	1	1	0	1	1	1	1	1	1	1	0	1	1	0	NaN	1	1	1	0	1	1	0	1	0	0	1	0	1	0	0	1	0	0	2
NaN	1	1	NaN	1	1	1	NaN	0	NaN	1	1	1	0	1	1	1	1	1	1	1	0	1	1	0	NaN	1	1	1	1	1	1	1	1	1	0	1	1	0	1	0	1	0	1	3
NaN	1	1	NaN	1	1	1	NaN	0	NaN	1	1	1	0	1	1	1	1	1	1	1	0	1	1	0	NaN	1	1	1	0	1	1	1	1	0	0	1	1	1	1	0	1	0	1	3
NaN	1	1	NaN	1	1	1	NaN	0	NaN	1	1	1	1	0	0	1	1	1	1	1	0	1	1	0	NaN	1	1	1	0	1	1	1	1	0	1	1	1	1	0	1	1	0	1	4
NaN	1	1	NaN	1	1	1	NaN	0	NaN	1	1	1	1	0	1	0	1	1	1	1	0	1	1	0	NaN	1	1	1	0	1	1	1	1	0	0	1	1	1	0	0	1	0	1	3
NaN	1	1	NaN	1	1	1	NaN	0	NaN	1	1	1	1	0	1	1	0	1	1	1	0	1	1	0	NaN	1	1	1	0	1	1	1	1	0	0	1	1	1	0	0	1	0	1	3
NaN	1	1	NaN	1	1	1	NaN	0	NaN	1	1	1	1	0	1	1	1	0	1	1	0	1	1	0	NaN	1	1	1	0	1	1	1	1	0	0	1	1	1	0	0	1	0	1	3
NaN	1	1	NaN	1	1	1	NaN	0	NaN	1	1	1	1	0	1	1	1	1	0	1	0	1	1	0	NaN	1	1	1	1	1	1	1	1	1	0	1	1	1	1	0	1	0	1	3
NaN	1	1	NaN	1	1	1	NaN	0	NaN	1	1	1	1	0	1	1	1	1	1	0	0	1	1	0	NaN	1	1	1	0	1	1	1	1	0	0	1	1	1	0	0	1	0	1	3
NaN	1	1	NaN	1	1	1	NaN	0	NaN	1	1	1	1	0	1	1	1	1	1	1	1	1	1	0	NaN	1	1	1	0	1	1	1	1	0	0	1	1	1	0	0	1	0	1	3
NaN	1	1	NaN	1	1	1	NaN	0	NaN	1	1	1	1	0	1	1	1	1	1	1	0	0	1	0	NaN	1	1	1	0	1	1	1	1	0	0	1	1	1	0	0	1	0	1	3
NaN	1	1	NaN	1	1	1	NaN	0	NaN	1	1	1	1	0	1	1	1	1	1	1	0	1	0	0	NaN	1	1	0	1	1	1	0	1	1	0	1	0	1	1	0	1	1	0	1
NaN	1	1	NaN	1	1	1	NaN	0	NaN	1	1	1	1	0	1	1	1	1	1	1	0	1	1	1	NaN	1	1	1	0	1	1	1	1	0	0	1	1	1	0	0	1	0	1	3
NaN	1	1	NaN	1	1	1	NaN	0	NaN	1	1	1	1	0	1	1	1	1	1	1	0	1	1	0	NaN	1	1	1	0	1	1	1	1	0	0	1	1	1	0	0	1	0	1	3
NaN	1	1	NaN	1	1	1	NaN	0	NaN	1	1	1	1	0	1	1	1	1	1	1	1	1	1	1	NaN	0	1	1	0	1	1	1	1	0	0	1	1	1	0	0	1	0	1	3
NaN	1	1	NaN	1	1	1	NaN	0	NaN	NaN	NaN	1	NaN	0	1	NaN	1	1	NaN	NaN	NaN	NaN	1	NaN	NaN	NaN	0	1	1	NaN	0	NaN	NaN	1	0	0	NaN	0	1	NaN	0	1	NaN	#VALUE!
NaN	1	1	NaN	1	1	1	NaN	0	NaN	1	1	1	1	0	1	1	1	1	1	1	0	1	1	0	NaN	1	1	0	1	1	1	0	1	1	0	1	0	1	1	0	1	1	0	1
NaN	1	1	NaN	1	1	1	NaN	0	NaN	1	1	1	1	0	1	1	1	1	1	1	0	1	1	0	NaN	1	1	1	1	1	1	1	1	1	0	1	1	1	1	0	1	0	1	3
NaN	1	1	NaN	1	1	1	NaN	0	NaN	1	1	1	1	0	1	1	1	1	1	1	0	1	1	0	NaN	1	1	1	0	0	1	1	1	0	0	1	1	1	0	0	1	0	1	3
NaN	1	1	NaN	1	1	1	NaN	0	NaN	1	1	1	1	0	1	1	1	1	1	1	0	1	1	0	NaN	1	1	1	0	1	0	1	1	0	0	1	1	1	0	0	1	0	1	3
NaN	1	1	NaN	1	1	1	NaN	0	NaN	1	1	1	1	0	1	1	1	1	1	1	0	1	1	0	NaN	1	1	1	0	1	1	0	1	0	0	1	1	1	0	0	1	0	1	3
NaN	1	1	NaN	1	1	1	NaN	0	NaN	1	1	1	1	0	1	1	1	1	1	1	0	1	1	0	NaN	1	1	1	0	1	1	1	0	0	0	1	1	1	0	0	1	0	1	3
NaN	1	1	NaN	1	1	1	NaN	0	NaN	1	1	1	1	0	1	1	1	1	1	1	0	1	1	0	NaN	1	1	1	0	1	1	1	1	1	0	1	1	1	0	0	1	0	1	3
NaN	1	1	NaN	1	1	1	NaN	0	NaN	1	1	1	1	0	1	1	1	1	1	1	0	1	1	0	NaN	1	1	1	0	1	1	1	1	0	1	1	1	1	0	1	1	0	1	4
NaN	1	1	NaN	1	1	1	NaN	0	NaN	1	1	1	1	0	1	1	1	1	1	1	0	1	1	0	NaN	1	1	1	1	1	1	0	1	1	0	0	0	1	1	0	1	1	0	1
NaN	1	1	NaN	1	1	1	NaN	0	NaN	1	1	1	1	0	1	1	1	1	1	1	0	1	1	0	NaN	1	1	1	0	1	1	0	1	0	0	1	0	1	0	0	1	0	0	2
NaN	1	1	NaN	1	1	1	NaN	0	NaN	1	1	1	1	0	1	1	1	1	1	1	0	1	1	0	NaN	1	1	1	1	1	1	1	1	1	0	1	1	0	1	0	1	0	1	3
NaN	1	1	NaN	1	1	1	NaN	0	NaN	1	1	1	1	0	1	1	1	1	1	1	0	1	1	0	NaN	1	1	1	0	1	1	1	1	0	0	1	1	1	1	0	1	0	1	3
NaN	1	1	NaN	1	1	1	NaN	0	NaN	1	1	1	1	1	0	0	1	1	1	1	0	1	1	0	NaN	1	1	1	0	1	1	1	1	0	1	1	1	1	0	1	1	0	1	4
NaN	1	1	NaN	1	1	1	NaN	0	NaN	1	1	1	1	1	0	1	0	1	1	1	0	1	1	0	NaN	1	1	1	0	1	1	1	1	0	1	1	1	1	0	1	1	0	1	4
NaN	1	1	NaN	1	1	1	NaN	0	NaN	1	1	1	1	1	0	1	1	0	1	1	0	1	1	0	NaN	1	1	1	0	1	1	1	1	0	1	1	1	1	0	1	1	0	1	4
NaN	1	1	NaN	1	1	1	NaN	0	NaN	1	1	1	1	1	0	1	1	1	0	1	0	1	1	0	NaN	1	1	1	1	1	1	1	1	1	1	1	1	1	1	1	1	0	1	4
NaN	1	1	NaN	1	1	1	NaN	0	NaN	1	1	1	1	1	0	1	1	1	1	0	0	1	1	0	NaN	1	1	1	0	1	1	1	1	0	1	1	1	1	0	1	1	0	1	4
NaN	1	1	NaN	1	1	1	NaN	0	NaN	1	1	1	1	1	0	1	1	1	1	1	1	1	1	0	NaN	1	1	1	0	1	1	1	1	0	1	1	1	1	0	1	1	0	1	4
NaN	1	1	NaN	1	1	1	NaN	0	NaN	1	1	1	1	1	0	1	1	1	1	1	0	0	1	0	NaN	1	1	1	0	1	1	1	1	0	1	1	1	1	0	1	1	0	1	4
NaN	1	1	NaN	1	1	1	NaN	0	NaN	1	1	1	1	1	0	1	1	1	1	1	0	1	0	0	NaN	1	1	0	1	1	1	0	1	1	1	1	0	1	1	1	1	1	0	2
NaN	1	1	NaN	1	1	1	NaN	0	NaN	1	1	1	1	1	0	1	1	1	1	1	0	1	1	1	NaN	1	1	1	0	1	1	1	1	0	1	1	1	1	0	1	1	0	1	4
NaN	1	1	NaN	1	1	1	NaN	0	NaN	1	1	1	1	1	0	1	1	1	1	1	0	1	1	0	NaN	1	1	1	0	1	1	1	1	0	1	1	1	1	0	1	1	0	1	4
NaN	1	1	NaN	1	1	1	NaN	0	NaN	1	1	1	1	1	0	1	1	1	1	1	1	1	1	1	NaN	0	1	1	0	1	1	1	1	0	1	1	1	1	0	1	1	0	1	4
NaN	1	1	NaN	1	1	1	NaN	0	NaN	NaN	NaN	1	NaN	NaN	0	NaN	1	1	NaN	NaN	NaN	NaN	1	NaN	NaN	NaN	0	1	1	NaN	0	NaN	NaN	1	1	0	NaN	0	1	1	0	1	NaN	#VALUE!
NaN	1	1	NaN	1	1	1	NaN	0	NaN	1	1	1	1	1	0	1	1	1	1	1	0	1	1	0	NaN	1	1	0	1	1	1	0	1	1	1	1	0	1	1	1	1	1	0	2
NaN	1	1	NaN	1	1	1	NaN	0	NaN	1	1	1	1	1	0	1	1	1	1	1	0	1	1	0	NaN	1	1	1	1	1	1	1	1	1	1	1	1	1	1	1	1	0	1	4
NaN	1	1	NaN	1	1	1	NaN	0	NaN	1	1	1	1	1	0	1	1	1	1	1	0	1	1	0	NaN	1	1	1	0	0	1	1	1	0	1	1	1	1	0	1	1	0	1	4
NaN	1	1	NaN	1	1	1	NaN	0	NaN	1	1	1	1	1	0	1	1	1	1	1	0	1	1	0	NaN	1	1	1	0	1	0	1	1	0	1	1	1	1	0	1	1	0	1	4
NaN	1	1	NaN	1	1	1	NaN	0	NaN	1	1	1	1	1	0	1	1	1	1	1	0	1	1	0	NaN	1	1	1	0	1	1	0	1	0	1	1	1	1	0	1	1	0	1	4
NaN	1	1	NaN	1	1	1	NaN	0	NaN	1	1	1	1	1	0	1	1	1	1	1	0	1	1	0	NaN	1	1	1	0	1	1	1	0	0	1	1	1	1	0	1	1	0	1	4
NaN	1	1	NaN	1	1	1	NaN	0	NaN	1	1	1	1	1	0	1	1	1	1	1	0	1	1	0	NaN	1	1	1	0	1	1	1	1	1	1	1	1	1	0	1	1	0	1	4
NaN	1	1	NaN	1	1	1	NaN	0	NaN	1	1	1	1	1	0	1	1	1	1	1	0	1	1	0	NaN	1	1	1	0	1	1	1	1	0	1	1	1	1	0	1	1	0	1	4
NaN	1	1	NaN	1	1	1	NaN	0	NaN	1	1	1	1	1	0	1	1	1	1	1	0	1	1	0	NaN	1	1	1	1	1	1	0	1	1	1	0	0	1	1	1	1	1	0	2
NaN	1	1	NaN	1	1	1	NaN	0	NaN	1	1	1	1	1	0	1	1	1	1	1	0	1	1	0	NaN	1	1	1	0	1	1	0	1	0	1	1	0	1	0	1	1	0	0	3
NaN	1	1	NaN	1	1	1	NaN	0	NaN	1	1	1	1	1	0	1	1	1	1	1	0	1	1	0	NaN	1	1	1	1	1	1	1	1	1	1	1	1	0	1	1	1	0	1	4
NaN	1	1	NaN	1	1	1	NaN	0	NaN	1	1	1	1	1	0	1	1	1	1	1	0	1	1	0	NaN	1	1	1	0	1	1	1	1	0	1	1	1	1	1	1	1	0	1	4
NaN	1	1	NaN	1	1	1	NaN	0	NaN	1	1	1	1	1	1	0	0	1	1	1	0	1	1	0	NaN	1	1	1	0	1	1	1	1	0	0	1	1	1	0	0	1	0	1	3
NaN	1	1	NaN	1	1	1	NaN	0	NaN	1	1	1	1	1	1	0	1	0	1	1	0	1	1	0	NaN	1	1	1	0	1	1	1	1	0	0	1	1	1	0	0	1	0	1	3
NaN	1	1	NaN	1	1	1	NaN	0	NaN	1	1	1	1	1	1	0	1	1	0	1	0	1	1	0	NaN	1	1	1	1	1	1	1	1	1	0	1	1	1	1	0	1	0	1	3
NaN	1	1	NaN	1	1	1	NaN	0	NaN	1	1	1	1	1	1	0	1	1	1	0	0	1	1	0	NaN	1	1	1	0	1	1	1	1	0	0	1	1	1	0	0	1	0	1	3
NaN	1	1	NaN	1	1	1	NaN	0	NaN	1	1	1	1	1	1	0	1	1	1	1	1	1	1	0	NaN	1	1	1	0	1	1	1	1	0	0	1	1	1	0	0	1	0	1	3
NaN	1	1	NaN	1	1	1	NaN	0	NaN	1	1	1	1	1	1	0	1	1	1	1	0	0	1	0	NaN	1	1	1	0	1	1	1	1	0	0	1	1	1	0	0	1	0	1	3
NaN	1	1	NaN	1	1	1	NaN	0	NaN	1	1	1	1	1	1	0	1	1	1	1	0	1	0	0	NaN	1	1	0	1	1	1	0	1	1	0	1	0	1	1	0	1	1	0	1
NaN	1	1	NaN	1	1	1	NaN	0	NaN	1	1	1	1	1	1	0	1	1	1	1	0	1	1	1	NaN	1	1	1	0	1	1	1	1	0	0	1	1	1	0	0	1	0	1	3
NaN	1	1	NaN	1	1	1	NaN	0	NaN	1	1	1	1	1	1	0	1	1	1	1	0	1	1	0	NaN	1	1	1	0	1	1	1	1	0	0	1	1	1	0	0	1	0	1	3
NaN	1	1	NaN	1	1	1	NaN	0	NaN	1	1	1	1	1	1	0	1	1	1	1	1	1	1	1	NaN	0	1	1	0	1	1	1	1	0	0	1	1	1	0	0	1	0	1	3
NaN	1	1	NaN	1	1	1	NaN	0	NaN	NaN	NaN	1	NaN	NaN	1	0	1	1	NaN	NaN	NaN	NaN	1	NaN	NaN	NaN	0	1	1	NaN	0	NaN	NaN	1	0	0	NaN	0	1	NaN	0	1	NaN	#VALUE!
NaN	1	1	NaN	1	1	1	NaN	0	NaN	1	1	1	1	1	1	0	1	1	1	1	0	1	1	0	NaN	1	1	0	1	1	1	0	1	1	0	1	0	1	1	0	1	1	0	1
NaN	1	1	NaN	1	1	1	NaN	0	NaN	1	1	1	1	1	1	0	1	1	1	1	0	1	1	0	NaN	1	1	1	1	1	1	1	1	1	0	1	1	1	1	0	1	0	1	3
NaN	1	1	NaN	1	1	1	NaN	0	NaN	1	1	1	1	1	1	0	1	1	1	1	0	1	1	0	NaN	1	1	1	0	0	1	1	1	0	0	1	1	1	0	0	1	0	1	3
NaN	1	1	NaN	1	1	1	NaN	0	NaN	1	1	1	1	1	1	0	1	1	1	1	0	1	1	0	NaN	1	1	1	0	1	0	1	1	0	0	1	1	1	0	0	1	0	1	3
NaN	1	1	NaN	1	1	1	NaN	0	NaN	1	1	1	1	1	1	0	1	1	1	1	0	1	1	0	NaN	1	1	1	0	1	1	0	1	0	0	1	1	1	0	0	1	0	1	3
NaN	1	1	NaN	1	1	1	NaN	0	NaN	1	1	1	1	1	1	0	1	1	1	1	0	1	1	0	NaN	1	1	1	0	1	1	1	0	0	0	1	1	1	0	0	1	0	1	3
NaN	1	1	NaN	1	1	1	NaN	0	NaN	1	1	1	1	1	1	0	1	1	1	1	0	1	1	0	NaN	1	1	1	0	1	1	1	1	1	0	1	1	1	0	0	1	0	1	3
NaN	1	1	NaN	1	1	1	NaN	0	NaN	1	1	1	1	1	1	0	1	1	1	1	0	1	1	0	NaN	1	1	1	0	1	1	1	1	0	1	1	1	1	0	1	1	0	1	4
NaN	1	1	NaN	1	1	1	NaN	0	NaN	1	1	1	1	1	1	0	1	1	1	1	0	1	1	0	NaN	1	1	1	1	1	1	0	1	1	0	0	0	1	1	0	1	1	0	1
NaN	1	1	NaN	1	1	1	NaN	0	NaN	1	1	1	1	1	1	0	1	1	1	1	0	1	1	0	NaN	1	1	1	0	1	1	0	1	0	0	1	0	1	0	0	1	0	0	2
NaN	1	1	NaN	1	1	1	NaN	0	NaN	1	1	1	1	1	1	0	1	1	1	1	0	1	1	0	NaN	1	1	1	1	1	1	1	1	1	0	1	1	0	1	0	1	0	1	3
NaN	1	1	NaN	1	1	1	NaN	0	NaN	1	1	1	1	1	1	0	1	1	1	1	0	1	1	0	NaN	1	1	1	0	1	1	1	1	0	0	1	1	1	1	0	1	0	1	3
NaN	1	1	NaN	1	1	1	NaN	0	NaN	1	1	1	1	1	1	1	0	0	1	1	0	1	1	0	NaN	1	1	1	0	1	1	1	1	0	0	1	1	1	0	0	1	0	1	3
NaN	1	1	NaN	1	1	1	NaN	0	NaN	1	1	1	1	1	1	1	0	1	0	1	0	1	1	0	NaN	1	1	1	1	1	1	1	1	1	0	1	1	1	1	0	1	0	1	3
NaN	1	1	NaN	1	1	1	NaN	0	NaN	1	1	1	1	1	1	1	0	1	1	0	0	1	1	0	NaN	1	1	1	0	1	1	1	1	0	0	1	1	1	0	0	1	0	1	3
NaN	1	1	NaN	1	1	1	NaN	0	NaN	1	1	1	1	1	1	1	0	1	1	1	1	1	1	0	NaN	1	1	1	0	1	1	1	1	0	0	1	1	1	0	0	1	0	1	3
NaN	1	1	NaN	1	1	1	NaN	0	NaN	1	1	1	1	1	1	1	0	1	1	1	0	0	1	0	NaN	1	1	1	0	1	1	1	1	0	0	1	1	1	0	0	1	0	1	3
NaN	1	1	NaN	1	1	1	NaN	0	NaN	1	1	1	1	1	1	1	0	1	1	1	0	1	0	0	NaN	1	1	1	1	1	1	1	1	1	0	1	1	1	1	0	1	0	1	3
NaN	1	1	NaN	1	1	1	NaN	0	NaN	1	1	1	1	1	1	1	0	1	1	1	0	1	1	1	NaN	1	1	1	0	1	1	1	1	0	0	1	1	1	0	0	1	0	1	3
NaN	1	1	NaN	1	1	1	NaN	0	NaN	1	1	1	1	1	1	1	0	1	1	1	0	1	1	0	NaN	1	1	1	0	1	1	1	1	0	0	1	1	1	0	0	1	0	1	3
NaN	1	1	NaN	1	1	1	NaN	0	NaN	1	1	1	1	1	1	1	0	1	1	1	1	1	1	1	NaN	0	1	1	0	1	1	1	1	0	0	1	1	1	0	0	1	0	1	3
NaN	1	1	NaN	1	1	1	NaN	0	NaN	NaN	NaN	1	NaN	NaN	1	NaN	0	1	NaN	NaN	NaN	NaN	1	NaN	NaN	NaN	0	1	1	NaN	0	NaN	NaN	1	0	0	NaN	0	1	NaN	0	1	NaN	#VALUE!
NaN	1	1	NaN	1	1	1	NaN	0	NaN	1	1	1	1	1	1	1	0	1	1	1	0	1	1	0	NaN	1	1	0	1	1	1	0	1	1	0	1	0	1	1	0	1	1	0	1
NaN	1	1	NaN	1	1	1	NaN	0	NaN	1	1	1	1	1	1	1	0	1	1	1	0	1	1	0	NaN	1	1	1	1	1	1	1	1	1	0	1	1	1	1	0	1	0	1	3
NaN	1	1	NaN	1	1	1	NaN	0	NaN	1	1	1	1	1	1	1	0	1	1	1	0	1	1	0	NaN	1	1	1	0	0	1	1	1	0	0	1	1	1	0	0	1	0	1	3
NaN	1	1	NaN	1	1	1	NaN	0	NaN	1	1	1	1	1	1	1	0	1	1	1	0	1	1	0	NaN	1	1	1	0	1	0	1	1	0	0	1	1	1	0	0	1	0	1	3
NaN	1	1	NaN	1	1	1	NaN	0	NaN	1	1	1	1	1	1	1	0	1	1	1	0	1	1	0	NaN	1	1	1	0	1	1	0	1	0	0	1	1	1	0	0	1	0	1	3
NaN	1	1	NaN	1	1	1	NaN	0	NaN	1	1	1	1	1	1	1	0	1	1	1	0	1	1	0	NaN	1	1	1	0	1	1	1	0	0	0	1	1	1	0	0	1	0	1	3
NaN	1	1	NaN	1	1	1	NaN	0	NaN	1	1	1	1	1	1	1	0	1	1	1	0	1	1	0	NaN	1	1	1	0	1	1	1	1	1	0	1	1	1	0	0	1	0	1	3
NaN	1	1	NaN	1	1	1	NaN	0	NaN	1	1	1	1	1	1	1	0	1	1	1	0	1	1	0	NaN	1	1	1	0	1	1	1	1	0	1	1	1	1	0	1	1	0	1	4
NaN	1	1	NaN	1	1	1	NaN	0	NaN	1	1	1	1	1	1	1	0	1	1	1	0	1	1	0	NaN	1	1	1	1	1	1	0	1	1	0	0	0	1	1	0	1	1	0	1
NaN	1	1	NaN	1	1	1	NaN	0	NaN	1	1	1	1	1	1	1	0	1	1	1	0	1	1	0	NaN	1	1	1	0	1	1	0	1	0	0	1	0	1	0	0	1	0	0	2
NaN	1	1	NaN	1	1	1	NaN	0	NaN	1	1	1	1	1	1	1	0	1	1	1	0	1	1	0	NaN	1	1	1	1	1	1	1	1	1	0	1	1	0	1	0	1	0	1	3
NaN	1	1	NaN	1	1	1	NaN	0	NaN	1	1	1	1	1	1	1	0	1	1	1	0	1	1	0	NaN	1	1	1	0	1	1	1	1	0	0	1	1	1	1	0	1	0	1	3
NaN	1	1	NaN	1	1	1	NaN	0	NaN	1	1	1	1	1	1	1	1	0	0	1	0	1	1	0	NaN	1	1	1	1	1	1	1	1	1	0	1	1	1	1	0	1	0	1	3
NaN	1	1	NaN	1	1	1	NaN	0	NaN	1	1	1	1	1	1	1	1	0	1	0	0	1	1	0	NaN	1	1	1	0	1	1	1	1	0	0	1	1	1	0	0	1	0	1	3
NaN	1	1	NaN	1	1	1	NaN	0	NaN	1	1	1	1	1	1	1	1	0	1	1	1	1	1	0	NaN	1	1	1	0	1	1	1	1	0	0	1	1	1	0	0	1	0	1	3
NaN	1	1	NaN	1	1	1	NaN	0	NaN	1	1	1	1	1	1	1	1	0	1	1	0	0	1	0	NaN	1	1	1	0	1	1	1	1	0	0	1	1	1	0	0	1	0	1	3
NaN	1	1	NaN	1	1	1	NaN	0	NaN	1	1	1	1	1	1	1	1	0	1	1	0	1	0	0	NaN	1	1	0	1	1	1	0	1	1	0	1	0	1	1	0	1	1	0	1
NaN	1	1	NaN	1	1	1	NaN	0	NaN	1	1	1	1	1	1	1	1	0	1	1	0	1	1	1	NaN	1	1	1	0	1	1	1	1	0	0	1	1	1	0	0	1	0	1	3
NaN	1	1	NaN	1	1	1	NaN	0	NaN	1	1	1	1	1	1	1	1	0	1	1	0	1	1	0	NaN	1	1	1	0	1	1	1	1	0	0	1	1	1	0	0	1	0	1	3
NaN	1	1	NaN	1	1	1	NaN	0	NaN	1	1	1	1	1	1	1	1	0	1	1	1	1	1	1	NaN	0	1	1	0	1	1	1	1	0	0	1	1	1	0	0	1	0	1	3
NaN	1	1	NaN	1	1	1	NaN	0	NaN	1	1	1	1	1	1	1	1	0	NaN	1	NaN	1	1	NaN	NaN	NaN	0	1	1	NaN	0	NaN	NaN	1	0	0	NaN	0	1	0	0	1	NaN	#VALUE!
NaN	1	1	NaN	1	1	1	NaN	0	NaN	1	1	1	1	1	1	1	1	0	1	1	0	1	1	0	NaN	1	1	0	1	1	1	0	1	1	0	1	0	1	1	0	1	1	0	1
NaN	1	1	NaN	1	1	1	NaN	0	NaN	1	1	1	1	1	1	1	1	0	1	1	0	1	1	0	NaN	1	1	1	1	1	1	1	1	1	0	1	1	1	1	0	1	0	1	3
NaN	1	1	NaN	1	1	1	NaN	0	NaN	1	1	1	1	1	1	1	1	0	1	1	0	1	1	0	NaN	1	1	1	0	0	1	1	1	0	0	1	1	1	0	0	1	0	1	3
NaN	1	1	NaN	1	1	1	NaN	0	NaN	1	1	1	1	1	1	1	1	0	1	1	0	1	1	0	NaN	1	1	1	0	1	0	1	1	0	0	1	1	1	0	0	1	0	1	3
NaN	1	1	NaN	1	1	1	NaN	0	NaN	1	1	1	1	1	1	1	1	0	1	1	0	1	1	0	NaN	1	1	1	0	1	1	0	1	0	0	1	1	1	0	0	1	0	1	3
NaN	1	1	NaN	1	1	1	NaN	0	NaN	1	1	1	1	1	1	1	1	0	1	1	0	1	1	0	NaN	1	1	1	0	1	1	1	0	0	0	1	1	1	0	0	1	0	1	3
NaN	1	1	NaN	1	1	1	NaN	0	NaN	1	1	1	1	1	1	1	1	0	1	1	0	1	1	0	NaN	1	1	1	0	1	1	1	1	1	0	1	1	1	0	0	1	0	1	3
NaN	1	1	NaN	1	1	1	NaN	0	NaN	1	1	1	1	1	1	1	1	0	1	1	0	1	1	0	NaN	1	1	1	0	1	1	1	1	0	1	1	1	1	0	1	1	0	1	4
NaN	1	1	NaN	1	1	1	NaN	0	NaN	1	1	1	1	1	1	1	1	0	1	1	0	1	1	0	NaN	1	1	1	1	1	1	0	1	1	0	0	0	1	1	0	1	1	0	1
NaN	1	1	NaN	1	1	1	NaN	0	NaN	1	1	1	1	1	1	1	1	0	1	1	0	1	1	0	NaN	1	1	1	0	1	1	0	1	0	0	1	0	1	0	0	1	0	0	2
NaN	1	1	NaN	1	1	1	NaN	0	NaN	1	1	1	1	1	1	1	1	0	1	1	0	1	1	0	NaN	1	1	1	1	1	1	1	1	1	0	1	1	0	1	0	1	0	1	3
NaN	1	1	NaN	1	1	1	NaN	0	NaN	1	1	1	1	1	1	1	1	0	1	1	0	1	1	0	NaN	1	1	1	0	1	1	1	1	0	0	1	1	1	1	0	1	0	1	3
NaN	1	1	NaN	1	1	1	NaN	0	NaN	1	1	1	1	1	1	1	1	1	0	0	0	1	1	0	NaN	1	1	1	1	1	1	1	1	1	0	1	1	1	1	0	1	0	1	3
NaN	1	1	NaN	1	1	1	NaN	0	NaN	1	1	1	1	1	1	1	1	1	0	1	1	1	1	0	NaN	1	1	1	1	1	1	1	1	1	0	1	1	1	1	0	1	0	1	3
NaN	1	1	NaN	1	1	1	NaN	0	NaN	1	1	1	1	1	1	1	1	1	0	1	0	0	1	0	NaN	1	1	1	1	1	1	1	1	1	0	1	1	1	1	0	1	0	1	3
NaN	1	1	NaN	1	1	1	NaN	0	NaN	1	1	1	1	1	1	1	1	1	0	1	0	1	0	0	NaN	1	1	0	1	1	1	0	1	1	0	1	0	1	1	0	1	1	0	1
NaN	1	1	NaN	1	1	1	NaN	0	NaN	1	1	1	1	1	1	1	1	1	0	1	0	1	1	1	NaN	1	1	1	1	1	1	1	1	1	0	1	1	1	1	0	1	0	1	3
NaN	1	1	NaN	1	1	1	NaN	0	NaN	1	1	1	1	1	1	1	1	1	0	1	0	1	1	0	NaN	1	1	1	1	1	1	1	1	1	0	1	1	1	1	0	1	0	1	3
NaN	1	1	NaN	1	1	1	NaN	0	NaN	1	1	1	1	1	1	1	1	1	0	1	1	1	1	1	NaN	0	1	1	1	1	1	1	1	1	0	1	1	1	1	0	1	0	1	3
NaN	1	1	NaN	1	1	1	NaN	0	NaN	NaN	NaN	1	NaN	NaN	1	NaN	1	1	0	NaN	NaN	NaN	1	NaN	NaN	NaN	0	1	1	NaN	0	NaN	NaN	1	0	0	NaN	0	1	NaN	0	1	NaN	#VALUE!
NaN	1	1	NaN	1	1	1	NaN	0	NaN	1	1	1	1	1	1	1	1	1	0	1	0	1	1	0	NaN	1	1	0	1	1	1	0	1	1	0	1	0	1	1	0	1	1	0	1
NaN	1	1	NaN	1	1	1	NaN	0	NaN	1	1	1	1	1	1	1	1	1	0	1	0	1	1	0	NaN	1	1	1	1	1	1	1	1	1	0	1	1	1	1	0	1	0	1	3
NaN	1	1	NaN	1	1	1	NaN	0	NaN	1	1	1	1	1	1	1	1	1	0	1	0	1	1	0	NaN	1	1	1	1	0	1	1	1	1	0	1	1	1	1	0	1	0	1	3
NaN	1	1	NaN	1	1	1	NaN	0	NaN	1	1	1	1	1	1	1	1	1	0	1	0	1	1	0	NaN	1	1	1	1	1	0	1	1	1	0	1	1	1	1	0	1	0	1	3
NaN	1	1	NaN	1	1	1	NaN	0	NaN	1	1	1	1	1	1	1	1	1	0	1	0	1	1	0	NaN	1	1	1	1	1	1	0	1	1	0	1	1	1	1	0	1	0	1	3
NaN	1	1	NaN	1	1	1	NaN	0	NaN	1	1	1	1	1	1	1	1	1	0	1	0	1	1	0	NaN	1	1	1	1	1	1	1	0	1	0	1	1	1	1	0	1	0	1	3
NaN	1	1	NaN	1	1	1	NaN	0	NaN	1	1	1	1	1	1	1	1	1	0	1	0	1	1	0	NaN	1	1	1	1	1	1	1	1	1	0	1	1	1	1	0	1	0	1	3
NaN	1	1	NaN	1	1	1	NaN	0	NaN	1	1	1	1	1	1	1	1	1	0	1	0	1	1	0	NaN	1	1	1	1	1	1	1	1	1	1	1	1	1	1	1	1	0	1	4
NaN	1	1	NaN	1	1	1	NaN	0	NaN	1	1	1	1	1	1	1	1	1	0	1	0	1	1	0	NaN	1	1	1	1	1	1	0	1	1	0	0	0	1	1	0	1	1	0	1
NaN	1	1	NaN	1	1	1	NaN	0	NaN	1	1	1	1	1	1	1	1	1	0	1	0	1	1	0	NaN	1	1	1	1	1	1	0	1	1	0	1	0	1	1	0	1	0	0	2
NaN	1	1	NaN	1	1	1	NaN	0	NaN	1	1	1	1	1	1	1	1	1	0	1	0	1	1	0	NaN	1	1	1	1	1	1	1	1	1	0	1	1	0	1	0	1	0	1	3
NaN	1	1	NaN	1	1	1	NaN	0	NaN	1	1	1	1	1	1	1	1	1	0	1	0	1	1	0	NaN	1	1	1	1	1	1	1	1	1	0	1	1	1	1	0	1	0	1	3
NaN	1	1	NaN	1	1	1	NaN	0	NaN	1	1	1	1	1	1	1	1	1	1	0	1	1	1	0	NaN	1	1	1	0	1	1	1	1	0	0	1	1	1	0	0	1	0	1	3
NaN	1	1	NaN	1	1	1	NaN	0	NaN	1	1	1	1	1	1	1	1	1	1	0	0	0	1	0	NaN	1	1	1	0	1	1	1	1	0	0	1	1	1	0	0	1	0	1	3
NaN	1	1	NaN	1	1	1	NaN	0	NaN	1	1	1	1	1	1	1	1	1	1	0	0	1	0	0	NaN	1	1	0	1	1	1	0	1	1	0	1	0	1	1	0	1	1	0	1
NaN	1	1	NaN	1	1	1	NaN	0	NaN	1	1	1	1	1	1	1	1	1	1	0	0	1	1	1	NaN	1	1	1	0	1	1	1	1	0	0	1	1	1	0	0	1	0	1	3
NaN	1	1	NaN	1	1	1	NaN	0	NaN	1	1	1	1	1	1	1	1	1	1	0	0	1	1	0	NaN	1	1	1	0	1	1	1	1	0	0	1	1	1	0	0	1	0	1	3
NaN	1	1	NaN	1	1	1	NaN	0	NaN	1	1	1	1	1	1	1	1	1	1	0	1	1	1	1	NaN	0	1	1	0	1	1	1	1	0	0	1	1	1	0	0	1	0	1	3
NaN	1	1	NaN	1	1	1	NaN	0	NaN	NaN	NaN	1	NaN	NaN	1	NaN	1	1	NaN	0	NaN	NaN	1	NaN	NaN	NaN	0	1	1	NaN	0	NaN	NaN	1	0	0	NaN	0	1	NaN	0	1	NaN	#VALUE!
NaN	1	1	NaN	1	1	1	NaN	0	NaN	1	1	1	1	1	1	1	1	1	1	0	0	1	1	0	NaN	1	1	0	1	1	1	0	1	1	0	1	0	1	1	0	1	1	0	1
NaN	1	1	NaN	1	1	1	NaN	0	NaN	1	1	1	1	1	1	1	1	1	1	0	0	1	1	0	NaN	1	1	1	1	1	1	1	1	1	0	1	1	1	1	0	1	0	1	3
NaN	1	1	NaN	1	1	1	NaN	0	NaN	1	1	1	1	1	1	1	1	1	1	0	0	1	1	0	NaN	1	1	1	0	0	1	1	1	0	0	1	1	1	0	0	1	0	1	3
NaN	1	1	NaN	1	1	1	NaN	0	NaN	1	1	1	1	1	1	1	1	1	1	0	0	1	1	0	NaN	1	1	1	0	1	0	1	1	0	0	1	1	1	0	0	1	0	1	3
NaN	1	1	NaN	1	1	1	NaN	0	NaN	1	1	1	1	1	1	1	1	1	1	0	0	1	1	0	NaN	1	1	1	0	1	1	0	1	0	0	1	1	1	0	0	1	0	1	3
NaN	1	1	NaN	1	1	1	NaN	0	NaN	1	1	1	1	1	1	1	1	1	1	0	0	1	1	0	NaN	1	1	1	0	1	1	1	0	0	0	1	1	1	0	0	1	0	1	3
NaN	1	1	NaN	1	1	1	NaN	0	NaN	1	1	1	1	1	1	1	1	1	1	0	0	1	1	0	NaN	1	1	1	0	1	1	1	1	1	0	1	1	1	0	0	1	0	1	3
NaN	1	1	NaN	1	1	1	NaN	0	NaN	1	1	1	1	1	1	1	1	1	1	0	0	1	1	0	NaN	1	1	1	0	1	1	1	1	0	1	1	1	1	0	1	1	0	1	4
NaN	1	1	NaN	1	1	1	NaN	0	NaN	1	1	1	1	1	1	1	1	1	1	0	0	1	1	0	NaN	1	1	1	1	1	1	0	1	1	0	0	0	1	1	0	1	1	0	1
NaN	1	1	NaN	1	1	1	NaN	0	NaN	1	1	1	1	1	1	1	1	1	1	0	0	1	1	0	NaN	1	1	1	0	1	1	0	1	0	0	1	0	1	0	0	1	0	0	2
NaN	1	1	NaN	1	1	1	NaN	0	NaN	1	1	1	1	1	1	1	1	1	1	0	0	1	1	0	NaN	1	1	1	1	1	1	1	1	1	0	1	1	0	1	0	1	0	1	3
NaN	1	1	NaN	1	1	1	NaN	0	NaN	1	1	1	1	1	1	1	1	1	1	0	0	1	1	0	NaN	1	1	1	0	1	1	1	1	0	0	1	1	1	1	0	1	0	1	3
NaN	1	1	NaN	1	1	1	NaN	0	NaN	1	1	1	1	1	1	1	1	1	1	1	1	0	1	0	NaN	1	1	1	0	1	1	1	1	0	0	1	1	1	0	0	1	0	1	3
NaN	1	1	NaN	1	1	1	NaN	0	NaN	1	1	1	1	1	1	1	1	1	1	1	1	1	0	0	NaN	1	1	0	1	1	1	0	1	1	0	1	0	1	1	0	1	1	0	1
NaN	1	1	NaN	1	1	1	NaN	0	NaN	1	1	1	1	1	1	1	1	1	1	1	1	1	1	1	NaN	1	1	1	0	1	1	1	1	0	0	1	1	1	0	0	1	0	1	3
NaN	1	1	NaN	1	1	1	NaN	0	NaN	1	1	1	1	1	1	1	1	1	1	1	1	1	1	0	NaN	1	1	1	0	1	1	1	1	0	0	1	1	1	0	0	1	0	1	3
NaN	1	1	NaN	1	1	1	NaN	0	NaN	1	1	1	1	1	1	1	1	1	1	1	1	1	1	1	NaN	0	1	1	0	1	1	1	1	0	0	1	1	1	0	0	1	0	1	3
NaN	1	1	NaN	1	1	1	NaN	0	NaN	NaN	NaN	1	NaN	NaN	1	NaN	1	1	NaN	NaN	1	NaN	1	NaN	NaN	NaN	0	1	1	NaN	0	NaN	NaN	1	0	0	NaN	0	1	NaN	0	1	NaN	#VALUE!
NaN	1	1	NaN	1	1	1	NaN	0	NaN	1	1	1	1	1	1	1	1	1	1	1	1	1	1	0	NaN	1	1	0	1	1	1	0	1	1	0	1	0	1	1	0	1	1	0	1
NaN	1	1	NaN	1	1	1	NaN	0	NaN	1	1	1	1	1	1	1	1	1	1	1	1	1	1	0	NaN	1	1	1	1	1	1	1	1	1	0	1	1	1	1	0	1	0	1	3
NaN	1	1	NaN	1	1	1	NaN	0	NaN	1	1	1	1	1	1	1	1	1	1	1	1	1	1	0	NaN	1	1	1	0	0	1	1	1	0	0	1	1	1	0	0	1	0	1	3
NaN	1	1	NaN	1	1	1	NaN	0	NaN	1	1	1	1	1	1	1	1	1	1	1	1	1	1	0	NaN	1	1	1	0	1	0	1	1	0	0	1	1	1	0	0	1	0	1	3
NaN	1	1	NaN	1	1	1	NaN	0	NaN	1	1	1	1	1	1	1	1	1	1	1	1	1	1	0	NaN	1	1	1	0	1	1	0	1	0	0	1	1	1	0	0	1	0	1	3
NaN	1	1	NaN	1	1	1	NaN	0	NaN	1	1	1	1	1	1	1	1	1	1	1	1	1	1	0	NaN	1	1	1	0	1	1	1	0	0	0	1	1	1	0	0	1	0	1	3
NaN	1	1	NaN	1	1	1	NaN	0	NaN	1	1	1	1	1	1	1	1	1	1	1	1	1	1	0	NaN	1	1	1	0	1	1	1	1	1	0	1	1	1	0	0	1	0	1	3
NaN	1	1	NaN	1	1	1	NaN	0	NaN	1	1	1	1	1	1	1	1	1	1	1	1	1	1	0	NaN	1	1	1	0	1	1	1	1	0	1	1	1	1	0	1	1	0	1	4
NaN	1	1	NaN	1	1	1	NaN	0	NaN	1	1	1	1	1	1	1	1	1	1	1	1	1	1	0	NaN	1	1	1	1	1	1	0	1	1	0	0	0	1	1	0	1	1	0	1
NaN	1	1	NaN	1	1	1	NaN	0	NaN	1	1	1	1	1	1	1	1	1	1	1	1	1	1	0	NaN	1	1	1	0	1	1	0	1	0	0	1	0	1	0	0	1	0	0	2
NaN	1	1	NaN	1	1	1	NaN	0	NaN	1	1	1	1	1	1	1	1	1	1	1	1	1	1	0	NaN	1	1	1	1	1	1	1	1	1	0	1	1	0	1	0	1	0	1	3
NaN	1	1	NaN	1	1	1	NaN	0	NaN	1	1	1	1	1	1	1	1	1	1	1	1	1	1	0	NaN	1	1	1	0	1	1	1	1	0	0	1	1	1	1	0	1	0	1	3
NaN	1	1	NaN	1	1	1	NaN	0	NaN	1	1	1	1	1	1	1	1	1	1	1	0	0	0	0	NaN	1	1	0	1	1	1	0	1	1	0	1	0	1	1	0	1	1	0	1
NaN	1	1	NaN	1	1	1	NaN	0	NaN	1	1	1	1	1	1	1	1	1	1	1	0	0	1	1	NaN	1	1	1	0	1	1	1	1	0	0	1	1	1	0	0	1	0	1	3
NaN	1	1	NaN	1	1	1	NaN	0	NaN	1	1	1	1	1	1	1	1	1	1	1	0	0	1	0	NaN	1	1	1	0	1	1	1	1	0	0	1	1	1	0	0	1	0	1	3
NaN	1	1	NaN	1	1	1	NaN	0	NaN	1	1	1	1	1	1	1	1	1	1	1	1	0	1	1	NaN	0	1	1	0	1	1	1	1	0	0	1	1	1	0	0	1	0	1	3
NaN	1	1	NaN	1	1	1	NaN	0	NaN	NaN	NaN	1	NaN	NaN	1	NaN	1	1	NaN	NaN	NaN	0	1	NaN	NaN	NaN	0	1	1	NaN	0	NaN	NaN	1	0	0	NaN	0	1	NaN	0	1	NaN	#VALUE!
NaN	1	1	NaN	1	1	1	NaN	0	NaN	1	1	1	1	1	1	1	1	1	1	1	0	0	1	0	NaN	1	1	0	1	1	1	0	1	1	0	1	0	1	1	0	1	1	0	1
NaN	1	1	NaN	1	1	1	NaN	0	NaN	1	1	1	1	1	1	1	1	1	1	1	0	0	1	0	NaN	1	1	1	1	1	1	1	1	1	0	1	1	1	1	0	1	0	1	3
NaN	1	1	NaN	1	1	1	NaN	0	NaN	1	1	1	1	1	1	1	1	1	1	1	0	0	1	0	NaN	1	1	1	0	0	1	1	1	0	0	1	1	1	0	0	1	0	1	3
NaN	1	1	NaN	1	1	1	NaN	0	NaN	1	1	1	1	1	1	1	1	1	1	1	0	0	1	0	NaN	1	1	1	0	1	0	1	1	0	0	1	1	1	0	0	1	0	1	3
NaN	1	1	NaN	1	1	1	NaN	0	NaN	1	1	1	1	1	1	1	1	1	1	1	0	0	1	0	NaN	1	1	1	0	1	1	0	1	0	0	1	1	1	0	0	1	0	1	3
NaN	1	1	NaN	1	1	1	NaN	0	NaN	1	1	1	1	1	1	1	1	1	1	1	0	0	1	0	NaN	1	1	1	0	1	1	1	0	0	0	1	1	1	0	0	1	0	1	3
NaN	1	1	NaN	1	1	1	NaN	0	NaN	1	1	1	1	1	1	1	1	1	1	1	0	0	1	0	NaN	1	1	1	0	1	1	1	1	1	0	1	1	1	0	0	1	0	1	3
NaN	1	1	NaN	1	1	1	NaN	0	NaN	1	1	1	1	1	1	1	1	1	1	1	0	0	1	0	NaN	1	1	1	0	1	1	1	1	0	1	1	1	1	0	1	1	0	1	4
NaN	1	1	NaN	1	1	1	NaN	0	NaN	1	1	1	1	1	1	1	1	1	1	1	0	0	1	0	NaN	1	1	1	1	1	1	0	1	1	0	0	0	1	1	0	1	1	0	1
NaN	1	1	NaN	1	1	1	NaN	0	NaN	1	1	1	1	1	1	1	1	1	1	1	0	0	1	0	NaN	1	1	1	0	1	1	0	1	0	0	1	0	1	0	0	1	0	0	2
NaN	1	1	NaN	1	1	1	NaN	0	NaN	1	1	1	1	1	1	1	1	1	1	1	0	0	1	0	NaN	1	1	1	1	1	1	1	1	1	0	1	1	0	1	0	1	0	1	3
NaN	1	1	NaN	1	1	1	NaN	0	NaN	1	1	1	1	1	1	1	1	1	1	1	0	0	1	0	NaN	1	1	1	0	1	1	1	1	0	0	1	1	1	1	0	1	0	1	3
NaN	1	1	NaN	1	1	1	NaN	0	NaN	1	1	1	1	1	1	1	1	1	1	1	0	1	0	1	NaN	1	1	0	1	1	1	0	1	1	0	1	0	1	1	0	1	1	0	1
NaN	1	1	NaN	1	1	1	NaN	0	NaN	1	1	1	1	1	1	1	1	1	1	1	0	1	0	0	NaN	1	1	0	1	1	1	0	1	1	0	1	0	1	1	0	1	1	0	1
NaN	1	1	NaN	1	1	1	NaN	0	NaN	1	1	1	1	1	1	1	1	1	1	1	1	1	0	1	NaN	0	1	0	1	1	1	0	1	1	0	1	0	1	1	0	1	1	0	1
NaN	1	1	NaN	1	1	1	NaN	0	NaN	NaN	NaN	1	NaN	NaN	1	NaN	1	1	NaN	NaN	NaN	NaN	0	NaN	NaN	NaN	0	1	1	NaN	0	NaN	NaN	1	0	0	NaN	0	1	NaN	0	1	NaN	#VALUE!
NaN	1	1	NaN	1	1	1	NaN	0	NaN	1	1	1	1	1	1	1	1	1	1	1	0	1	0	0	NaN	1	1	0	1	1	1	0	1	1	0	1	0	1	1	0	1	1	0	1
NaN	1	1	NaN	1	1	1	NaN	0	NaN	1	1	1	1	1	1	1	1	1	1	1	0	1	0	0	NaN	1	1	0	1	1	1	0	1	1	0	1	0	1	1	0	1	1	0	1
NaN	1	1	NaN	1	1	1	NaN	0	NaN	1	1	1	1	1	1	1	1	1	1	1	0	1	0	0	NaN	1	1	0	1	0	1	0	1	1	0	1	0	1	1	0	1	1	0	1
NaN	1	1	NaN	1	1	1	NaN	0	NaN	1	1	1	1	1	1	1	1	1	1	1	0	1	0	0	NaN	1	1	0	1	1	0	0	1	1	0	1	0	1	1	0	1	1	0	1
NaN	1	1	NaN	1	1	1	NaN	0	NaN	1	1	1	1	1	1	1	1	1	1	1	0	1	0	0	NaN	1	1	0	1	1	1	0	1	1	0	1	0	1	1	0	1	1	0	1
NaN	1	1	NaN	1	1	1	NaN	0	NaN	1	1	1	1	1	1	1	1	1	1	1	0	1	0	0	NaN	1	1	0	1	1	1	1	0	1	0	1	1	1	1	0	1	1	1	2
NaN	1	1	NaN	1	1	1	NaN	0	NaN	1	1	1	1	1	1	1	1	1	1	1	0	1	0	0	NaN	1	1	0	1	1	1	0	1	1	0	1	0	1	1	0	1	1	0	1
NaN	1	1	NaN	1	1	1	NaN	0	NaN	1	1	1	1	1	1	1	1	1	1	1	0	1	0	0	NaN	1	1	0	1	1	1	0	1	1	1	1	0	1	1	1	1	1	0	2
NaN	1	1	NaN	1	1	1	NaN	0	NaN	1	1	1	1	1	1	1	1	1	1	1	0	1	0	0	NaN	1	1	1	1	1	1	0	1	1	0	0	0	1	1	0	1	1	0	1
NaN	1	1	NaN	1	1	1	NaN	0	NaN	1	1	1	1	1	1	1	1	1	1	1	0	1	0	0	NaN	1	1	0	1	1	1	0	1	1	0	1	0	1	1	0	1	1	0	1
NaN	1	1	NaN	1	1	1	NaN	0	NaN	1	1	1	1	1	1	1	1	1	1	1	0	1	0	0	NaN	1	1	0	1	1	1	0	1	1	0	1	0	0	1	0	1	1	0	1
NaN	1	1	NaN	1	1	1	NaN	0	NaN	1	1	1	1	1	1	1	1	1	1	1	0	1	0	0	NaN	1	1	0	1	1	1	0	1	1	0	1	0	1	1	0	1	1	0	1
NaN	1	1	NaN	1	1	1	NaN	0	NaN	1	1	1	1	1	1	1	1	1	1	1	0	1	1	1	NaN	1	1	1	0	1	1	1	1	0	0	1	1	1	0	0	1	0	1	3
NaN	1	1	NaN	1	1	1	NaN	0	NaN	1	1	1	1	1	1	1	1	1	1	1	1	1	1	1	NaN	0	1	1	0	1	1	1	1	0	0	1	1	1	0	0	1	0	1	3
NaN	1	1	NaN	1	1	1	NaN	0	NaN	NaN	NaN	1	NaN	NaN	1	NaN	1	1	NaN	NaN	NaN	NaN	1	1	NaN	NaN	0	1	1	NaN	0	NaN	NaN	1	0	0	NaN	0	1	NaN	0	1	NaN	#VALUE!
NaN	1	1	NaN	1	1	1	NaN	0	NaN	1	1	1	1	1	1	1	1	1	1	1	0	1	1	1	NaN	1	1	0	1	1	1	0	1	1	0	1	0	1	1	0	1	1	0	1
NaN	1	1	NaN	1	1	1	NaN	0	NaN	1	1	1	1	1	1	1	1	1	1	1	0	1	1	1	NaN	1	1	1	1	1	1	1	1	1	0	1	1	1	1	0	1	0	1	3
NaN	1	1	NaN	1	1	1	NaN	0	NaN	1	1	1	1	1	1	1	1	1	1	1	0	1	1	1	NaN	1	1	1	0	0	1	1	1	0	0	1	1	1	0	0	1	0	1	3
NaN	1	1	NaN	1	1	1	NaN	0	NaN	1	1	1	1	1	1	1	1	1	1	1	0	1	1	1	NaN	1	1	1	0	1	0	1	1	0	0	1	1	1	0	0	1	0	1	3
NaN	1	1	NaN	1	1	1	NaN	0	NaN	1	1	1	1	1	1	1	1	1	1	1	0	1	1	1	NaN	1	1	1	0	1	1	0	1	0	0	1	1	1	0	0	1	0	1	3
NaN	1	1	NaN	1	1	1	NaN	0	NaN	1	1	1	1	1	1	1	1	1	1	1	0	1	1	1	NaN	1	1	1	0	1	1	1	0	0	0	1	1	1	0	0	1	0	1	3
NaN	1	1	NaN	1	1	1	NaN	0	NaN	1	1	1	1	1	1	1	1	1	1	1	0	1	1	1	NaN	1	1	1	0	1	1	1	1	1	0	1	1	1	0	0	1	0	1	3
NaN	1	1	NaN	1	1	1	NaN	0	NaN	1	1	1	1	1	1	1	1	1	1	1	0	1	1	1	NaN	1	1	1	0	1	1	1	1	0	1	1	1	1	0	1	1	0	1	4
NaN	1	1	NaN	1	1	1	NaN	0	NaN	1	1	1	1	1	1	1	1	1	1	1	0	1	1	1	NaN	1	1	1	1	1	1	0	1	1	0	0	0	1	1	0	1	1	0	1
NaN	1	1	NaN	1	1	1	NaN	0	NaN	1	1	1	1	1	1	1	1	1	1	1	0	1	1	1	NaN	1	1	1	0	1	1	0	1	0	0	1	0	1	0	0	1	0	0	2
NaN	1	1	NaN	1	1	1	NaN	0	NaN	1	1	1	1	1	1	1	1	1	1	1	0	1	1	1	NaN	1	1	1	1	1	1	1	1	1	0	1	1	0	1	0	1	0	1	3
NaN	1	1	NaN	1	1	1	NaN	0	NaN	1	1	1	1	1	1	1	1	1	1	1	0	1	1	1	NaN	1	1	1	0	1	1	1	1	0	0	1	1	1	1	0	1	0	1	3
NaN	1	1	NaN	1	1	1	NaN	0	NaN	1	1	1	1	1	1	1	1	1	1	1	1	1	1	1	NaN	0	1	1	0	1	1	1	1	0	0	1	1	1	0	0	1	0	1	3
NaN	1	1	NaN	1	1	1	NaN	0	NaN	NaN	NaN	1	NaN	NaN	1	NaN	1	1	NaN	NaN	NaN	NaN	1	NaN	NaN	NaN	0	1	1	NaN	0	NaN	NaN	1	0	0	NaN	0	1	NaN	0	1	NaN	#VALUE!
NaN	1	1	NaN	1	1	1	NaN	0	NaN	1	1	1	1	1	1	1	1	1	1	1	0	1	1	0	NaN	1	1	0	1	1	1	0	1	1	0	1	0	1	1	0	1	1	0	1
NaN	1	1	NaN	1	1	1	NaN	0	NaN	1	1	1	1	1	1	1	1	1	1	1	0	1	1	0	NaN	1	1	1	1	1	1	1	1	1	0	1	1	1	1	0	1	0	1	3
NaN	1	1	NaN	1	1	1	NaN	0	NaN	1	1	1	1	1	1	1	1	1	1	1	0	1	1	0	NaN	1	1	1	0	0	1	1	1	0	0	1	1	1	0	0	1	0	1	3
NaN	1	1	NaN	1	1	1	NaN	0	NaN	1	1	1	1	1	1	1	1	1	1	1	0	1	1	0	NaN	1	1	1	0	1	0	1	1	0	0	1	1	1	0	0	1	0	1	3
NaN	1	1	NaN	1	1	1	NaN	0	NaN	1	1	1	1	1	1	1	1	1	1	1	0	1	1	0	NaN	1	1	1	0	1	1	0	1	0	0	1	1	1	0	0	1	0	1	3
NaN	1	1	NaN	1	1	1	NaN	0	NaN	1	1	1	1	1	1	1	1	1	1	1	0	1	1	0	NaN	1	1	1	0	1	1	1	0	0	0	1	1	1	0	0	1	0	1	3
NaN	1	1	NaN	1	1	1	NaN	0	NaN	1	1	1	1	1	1	1	1	1	1	1	0	1	1	0	NaN	1	1	1	0	1	1	1	1	1	0	1	1	1	0	0	1	0	1	3
NaN	1	1	NaN	1	1	1	NaN	0	NaN	1	1	1	1	1	1	1	1	1	1	1	0	1	1	0	NaN	1	1	1	0	1	1	1	1	0	1	1	1	1	0	1	1	0	1	4
NaN	1	1	NaN	1	1	1	NaN	0	NaN	1	1	1	1	1	1	1	1	1	1	1	0	1	1	0	NaN	1	1	1	1	1	1	0	1	1	0	0	0	1	1	0	1	1	0	1
NaN	1	1	NaN	1	1	1	NaN	0	NaN	1	1	1	1	1	1	1	1	1	1	1	0	1	1	0	NaN	1	1	1	0	1	1	0	1	0	0	1	0	1	0	0	1	0	0	2
NaN	1	1	NaN	1	1	1	NaN	0	NaN	1	1	1	1	1	1	1	1	1	1	1	0	1	1	0	NaN	1	1	1	1	1	1	1	1	1	0	1	1	0	1	0	1	0	1	3
NaN	1	1	NaN	1	1	1	NaN	0	NaN	1	1	1	1	1	1	1	1	1	1	1	0	1	1	0	NaN	1	1	1	0	1	1	1	1	0	0	1	1	1	1	0	1	0	1	3
NaN	1	1	NaN	1	1	1	NaN	0	NaN	NaN	NaN	1	NaN	NaN	1	NaN	1	1	NaN	NaN	1	NaN	1	1	NaN	0	0	1	1	NaN	0	NaN	NaN	1	0	0	NaN	0	1	NaN	0	1	NaN	#VALUE!
NaN	1	1	NaN	1	1	1	NaN	0	NaN	1	1	1	1	1	1	1	1	1	1	1	1	1	1	1	NaN	0	1	0	1	1	1	0	1	1	0	1	0	1	1	0	1	1	0	1
NaN	1	1	NaN	1	1	1	NaN	0	NaN	1	1	1	1	1	1	1	1	1	1	1	1	1	1	1	NaN	0	1	1	1	1	1	1	1	1	0	1	1	1	1	0	1	0	1	3
NaN	1	1	NaN	1	1	1	NaN	0	NaN	1	1	1	1	1	1	1	1	1	1	1	1	1	1	1	NaN	0	1	1	0	0	1	1	1	0	0	1	1	1	0	0	1	0	1	3
NaN	1	1	NaN	1	1	1	NaN	0	NaN	1	1	1	1	1	1	1	1	1	1	1	1	1	1	1	NaN	0	1	1	0	1	0	1	1	0	0	1	1	1	0	0	1	0	1	3
NaN	1	1	NaN	1	1	1	NaN	0	NaN	1	1	1	1	1	1	1	1	1	1	1	1	1	1	1	NaN	0	1	1	0	1	1	0	1	0	0	1	1	1	0	0	1	0	1	3
NaN	1	1	NaN	1	1	1	NaN	0	NaN	1	1	1	1	1	1	1	1	1	1	1	1	1	1	1	NaN	0	1	1	0	1	1	1	0	0	0	1	1	1	0	0	1	0	1	3
NaN	1	1	NaN	1	1	1	NaN	0	NaN	1	1	1	1	1	1	1	1	1	1	1	1	1	1	1	NaN	0	1	1	0	1	1	1	1	1	0	1	1	1	0	0	1	0	1	3
NaN	1	1	NaN	1	1	1	NaN	0	NaN	1	1	1	1	1	1	1	1	1	1	1	1	1	1	1	NaN	0	1	1	0	1	1	1	1	0	1	1	1	1	0	1	1	0	1	4
NaN	1	1	NaN	1	1	1	NaN	0	NaN	1	1	1	1	1	1	1	1	1	1	1	1	1	1	1	NaN	0	1	1	1	1	1	0	1	1	0	0	0	1	1	0	1	1	0	1
NaN	1	1	NaN	1	1	1	NaN	0	NaN	1	1	1	1	1	1	1	1	1	1	1	1	1	1	1	NaN	0	1	1	0	1	1	0	1	0	0	1	0	1	0	0	1	0	0	2
NaN	1	1	NaN	1	1	1	NaN	0	NaN	1	1	1	1	1	1	1	1	1	1	1	1	1	1	1	NaN	0	1	1	1	1	1	1	1	1	0	1	1	0	1	0	1	0	1	3
NaN	1	1	NaN	1	1	1	NaN	0	NaN	1	1	1	1	1	1	1	1	1	1	1	1	1	1	1	NaN	0	1	1	0	1	1	1	1	0	0	1	1	1	1	0	1	0	1	3
NaN	1	1	NaN	1	1	1	NaN	0	NaN	NaN	NaN	1	NaN	NaN	1	NaN	1	1	NaN	NaN	NaN	NaN	1	NaN	NaN	NaN	0	0	1	1	0	NaN	NaN	1	0	0	NaN	0	1	NaN	0	1	NaN	#VALUE!
NaN	1	1	NaN	1	1	1	NaN	0	NaN	NaN	NaN	1	NaN	NaN	1	NaN	1	1	NaN	NaN	NaN	NaN	1	NaN	NaN	NaN	0	1	1	NaN	0	NaN	NaN	1	0	0	NaN	0	1	NaN	0	1	NaN	#VALUE!
NaN	1	1	NaN	1	1	1	NaN	0	NaN	NaN	NaN	1	NaN	NaN	1	NaN	1	1	NaN	NaN	NaN	NaN	1	NaN	NaN	NaN	0	1	1	0	0	NaN	NaN	1	0	0	NaN	0	1	NaN	0	1	NaN	#VALUE!
NaN	1	1	NaN	1	1	1	NaN	0	NaN	NaN	NaN	1	NaN	NaN	1	NaN	1	1	NaN	NaN	NaN	NaN	1	NaN	NaN	NaN	0	1	1	NaN	0	NaN	NaN	1	0	0	NaN	0	1	NaN	0	1	NaN	#VALUE!
NaN	1	1	NaN	1	1	1	NaN	0	NaN	NaN	NaN	1	NaN	NaN	1	NaN	1	1	NaN	NaN	NaN	NaN	1	NaN	NaN	NaN	0	1	1	NaN	0	0	NaN	1	0	0	NaN	0	1	NaN	0	1	NaN	#VALUE!
NaN	1	1	NaN	1	1	1	NaN	0	NaN	NaN	NaN	1	NaN	NaN	1	NaN	1	1	NaN	NaN	NaN	NaN	1	NaN	NaN	NaN	0	1	1	1	0	1	0	1	0	0	1	0	1	NaN	0	1	1	#VALUE!
NaN	1	1	NaN	1	1	1	NaN	0	NaN	NaN	NaN	1	NaN	NaN	1	NaN	1	1	NaN	NaN	NaN	NaN	1	NaN	NaN	NaN	0	1	1	NaN	0	NaN	NaN	1	0	0	NaN	0	1	NaN	0	1	NaN	#VALUE!
NaN	1	1	NaN	1	1	1	NaN	0	NaN	NaN	NaN	1	NaN	NaN	1	NaN	1	1	NaN	NaN	NaN	NaN	1	NaN	NaN	NaN	0	1	1	NaN	0	NaN	NaN	1	1	0	NaN	0	1	1	0	1	NaN	#VALUE!
NaN	1	1	NaN	1	1	1	NaN	0	NaN	NaN	NaN	1	NaN	NaN	1	NaN	1	1	NaN	NaN	NaN	NaN	1	NaN	NaN	NaN	0	1	1	NaN	0	NaN	NaN	1	0	0	NaN	0	1	NaN	0	1	NaN	#VALUE!
NaN	1	1	NaN	1	1	1	NaN	0	NaN	NaN	NaN	1	NaN	NaN	1	NaN	1	1	NaN	NaN	NaN	NaN	1	NaN	NaN	NaN	0	1	1	NaN	0	0	NaN	1	0	0	0	0	1	NaN	0	1	0	#VALUE!
NaN	1	1	NaN	1	1	1	NaN	0	NaN	NaN	NaN	1	NaN	NaN	1	NaN	1	1	NaN	NaN	NaN	NaN	1	NaN	NaN	NaN	0	1	1	NaN	0	NaN	NaN	1	0	0	NaN	0	1	NaN	0	1	NaN	#VALUE!
NaN	1	1	NaN	1	1	1	NaN	0	NaN	NaN	NaN	1	NaN	NaN	1	NaN	1	1	NaN	NaN	NaN	NaN	1	NaN	NaN	NaN	0	1	1	NaN	0	NaN	NaN	1	0	0	NaN	0	1	NaN	0	1	NaN	#VALUE!
NaN	1	1	NaN	1	1	1	NaN	0	NaN	1	1	1	1	1	1	1	1	1	1	1	0	1	1	0	NaN	1	1	0	1	1	1	0	1	1	0	1	0	1	1	0	1	1	0	1
NaN	1	1	NaN	1	1	1	NaN	0	NaN	1	1	1	1	1	1	1	1	1	1	1	0	1	1	0	NaN	1	1	0	1	0	1	0	1	1	0	1	0	1	1	0	1	1	0	1
NaN	1	1	NaN	1	1	1	NaN	0	NaN	1	1	1	1	1	1	1	1	1	1	1	0	1	1	0	NaN	1	1	0	1	1	0	0	1	1	0	1	0	1	1	0	1	1	0	1
NaN	1	1	NaN	1	1	1	NaN	0	NaN	1	1	1	1	1	1	1	1	1	1	1	0	1	1	0	NaN	1	1	0	1	1	1	0	1	1	0	1	0	1	1	0	1	1	0	1
NaN	1	1	NaN	1	1	1	NaN	0	NaN	1	1	1	1	1	1	1	1	1	1	1	0	1	1	0	NaN	1	1	0	1	1	1	1	0	1	0	1	1	1	1	0	1	1	1	2
NaN	1	1	NaN	1	1	1	NaN	0	NaN	1	1	1	1	1	1	1	1	1	1	1	0	1	1	0	NaN	1	1	0	1	1	1	0	1	1	0	1	0	1	1	0	1	1	0	1
NaN	1	1	NaN	1	1	1	NaN	0	NaN	1	1	1	1	1	1	1	1	1	1	1	0	1	1	0	NaN	1	1	0	1	1	1	0	1	1	1	1	0	1	1	1	1	1	0	2
NaN	1	1	NaN	1	1	1	NaN	0	NaN	1	1	1	1	1	1	1	1	1	1	1	0	1	1	0	NaN	1	1	0	1	1	1	0	1	1	0	0	0	1	1	0	1	1	0	1
NaN	1	1	NaN	1	1	1	NaN	0	NaN	1	1	1	1	1	1	1	1	1	1	1	0	1	1	0	NaN	1	1	0	1	1	1	0	1	1	0	1	0	1	1	0	1	1	0	1
NaN	1	1	NaN	1	1	1	NaN	0	NaN	1	1	1	1	1	1	1	1	1	1	1	0	1	1	0	NaN	1	1	0	1	1	1	0	1	1	0	1	0	0	1	0	1	1	0	1
NaN	1	1	NaN	1	1	1	NaN	0	NaN	1	1	1	1	1	1	1	1	1	1	1	0	1	1	0	NaN	1	1	0	1	1	1	0	1	1	0	1	0	1	1	0	1	1	0	1
NaN	1	1	NaN	1	1	1	NaN	0	NaN	1	1	1	1	1	1	1	1	1	1	1	0	1	1	0	NaN	1	1	1	1	0	1	1	1	1	0	1	1	1	1	0	1	0	1	3
NaN	1	1	NaN	1	1	1	NaN	0	NaN	1	1	1	1	1	1	1	1	1	1	1	0	1	1	0	NaN	1	1	1	1	1	0	1	1	1	0	1	1	1	1	0	1	0	1	3
NaN	1	1	NaN	1	1	1	NaN	0	NaN	1	1	1	1	1	1	1	1	1	1	1	0	1	1	0	NaN	1	1	1	1	1	1	0	1	1	0	1	1	1	1	0	1	0	1	3
NaN	1	1	NaN	1	1	1	NaN	0	NaN	1	1	1	1	1	1	1	1	1	1	1	0	1	1	0	NaN	1	1	1	1	1	1	1	0	1	0	1	1	1	1	0	1	0	1	3
NaN	1	1	NaN	1	1	1	NaN	0	NaN	1	1	1	1	1	1	1	1	1	1	1	0	1	1	0	NaN	1	1	1	1	1	1	1	1	1	0	1	1	1	1	0	1	0	1	3
NaN	1	1	NaN	1	1	1	NaN	0	NaN	1	1	1	1	1	1	1	1	1	1	1	0	1	1	0	NaN	1	1	1	1	1	1	1	1	1	1	1	1	1	1	1	1	0	1	4
NaN	1	1	NaN	1	1	1	NaN	0	NaN	1	1	1	1	1	1	1	1	1	1	1	0	1	1	0	NaN	1	1	1	1	1	1	0	1	1	0	0	0	1	1	0	1	1	0	1
NaN	1	1	NaN	1	1	1	NaN	0	NaN	1	1	1	1	1	1	1	1	1	1	1	0	1	1	0	NaN	1	1	1	1	1	1	0	1	1	0	1	0	1	1	0	1	0	0	2
NaN	1	1	NaN	1	1	1	NaN	0	NaN	1	1	1	1	1	1	1	1	1	1	1	0	1	1	0	NaN	1	1	1	1	1	1	1	1	1	0	1	1	0	1	0	1	0	1	3
NaN	1	1	NaN	1	1	1	NaN	0	NaN	1	1	1	1	1	1	1	1	1	1	1	0	1	1	0	NaN	1	1	1	1	1	1	1	1	1	0	1	1	1	1	0	1	0	1	3
NaN	1	1	NaN	1	1	1	NaN	0	NaN	1	1	1	1	1	1	1	1	1	1	1	0	1	1	0	NaN	1	1	1	0	0	0	1	1	0	0	1	1	1	0	0	1	0	1	3
NaN	1	1	NaN	1	1	1	NaN	0	NaN	1	1	1	1	1	1	1	1	1	1	1	0	1	1	0	NaN	1	1	1	0	0	1	0	1	0	0	1	1	1	0	0	1	0	1	3
NaN	1	1	NaN	1	1	1	NaN	0	NaN	1	1	1	1	1	1	1	1	1	1	1	0	1	1	0	NaN	1	1	1	0	0	1	1	0	0	0	1	1	1	0	0	1	0	1	3
NaN	1	1	NaN	1	1	1	NaN	0	NaN	1	1	1	1	1	1	1	1	1	1	1	0	1	1	0	NaN	1	1	1	0	0	1	1	1	1	0	1	1	1	0	0	1	0	1	3
NaN	1	1	NaN	1	1	1	NaN	0	NaN	1	1	1	1	1	1	1	1	1	1	1	0	1	1	0	NaN	1	1	1	0	0	1	1	1	0	1	1	1	1	0	1	1	0	1	4
NaN	1	1	NaN	1	1	1	NaN	0	NaN	1	1	1	1	1	1	1	1	1	1	1	0	1	1	0	NaN	1	1	1	1	0	1	0	1	1	0	0	0	1	1	0	1	1	0	1
NaN	1	1	NaN	1	1	1	NaN	0	NaN	1	1	1	1	1	1	1	1	1	1	1	0	1	1	0	NaN	1	1	1	0	0	1	0	1	0	0	1	0	1	0	0	1	0	0	2
NaN	1	1	NaN	1	1	1	NaN	0	NaN	1	1	1	1	1	1	1	1	1	1	1	0	1	1	0	NaN	1	1	1	1	0	1	1	1	1	0	1	1	0	1	0	1	0	1	3
NaN	1	1	NaN	1	1	1	NaN	0	NaN	1	1	1	1	1	1	1	1	1	1	1	0	1	1	0	NaN	1	1	1	0	0	1	1	1	0	0	1	1	1	1	0	1	0	1	3
NaN	1	1	NaN	1	1	1	NaN	0	NaN	1	1	1	1	1	1	1	1	1	1	1	0	1	1	0	NaN	1	1	1	0	1	0	0	1	0	0	1	1	1	0	0	1	0	1	3
NaN	1	1	NaN	1	1	1	NaN	0	NaN	1	1	1	1	1	1	1	1	1	1	1	0	1	1	0	NaN	1	1	1	0	1	0	1	0	0	0	1	1	1	0	0	1	0	1	3
NaN	1	1	NaN	1	1	1	NaN	0	NaN	1	1	1	1	1	1	1	1	1	1	1	0	1	1	0	NaN	1	1	1	0	1	0	1	1	1	0	1	1	1	0	0	1	0	1	3
NaN	1	1	NaN	1	1	1	NaN	0	NaN	1	1	1	1	1	1	1	1	1	1	1	0	1	1	0	NaN	1	1	1	0	1	0	1	1	0	1	1	1	1	0	1	1	0	1	4
NaN	1	1	NaN	1	1	1	NaN	0	NaN	1	1	1	1	1	1	1	1	1	1	1	0	1	1	0	NaN	1	1	1	1	1	0	0	1	1	0	0	0	1	1	0	1	1	0	1
NaN	1	1	NaN	1	1	1	NaN	0	NaN	1	1	1	1	1	1	1	1	1	1	1	0	1	1	0	NaN	1	1	1	0	1	0	0	1	0	0	1	0	1	0	0	1	0	0	2
NaN	1	1	NaN	1	1	1	NaN	0	NaN	1	1	1	1	1	1	1	1	1	1	1	0	1	1	0	NaN	1	1	1	1	1	0	1	1	1	0	1	1	0	1	0	1	0	1	3
NaN	1	1	NaN	1	1	1	NaN	0	NaN	1	1	1	1	1	1	1	1	1	1	1	0	1	1	0	NaN	1	1	1	0	1	0	1	1	0	0	1	1	1	1	0	1	0	1	3
NaN	1	1	NaN	1	1	1	NaN	0	NaN	1	1	1	1	1	1	1	1	1	1	1	0	1	1	0	NaN	1	1	1	0	1	1	0	0	0	0	1	1	1	0	0	1	0	1	3
NaN	1	1	NaN	1	1	1	NaN	0	NaN	1	1	1	1	1	1	1	1	1	1	1	0	1	1	0	NaN	1	1	1	0	1	1	0	1	1	0	1	1	1	0	0	1	0	1	3
NaN	1	1	NaN	1	1	1	NaN	0	NaN	1	1	1	1	1	1	1	1	1	1	1	0	1	1	0	NaN	1	1	1	0	1	1	0	1	0	1	1	1	1	0	1	1	0	1	4
NaN	1	1	NaN	1	1	1	NaN	0	NaN	1	1	1	1	1	1	1	1	1	1	1	0	1	1	0	NaN	1	1	1	1	1	1	0	1	1	0	0	0	1	1	0	1	1	0	1
NaN	1	1	NaN	1	1	1	NaN	0	NaN	1	1	1	1	1	1	1	1	1	1	1	0	1	1	0	NaN	1	1	1	0	1	1	0	1	0	0	1	0	1	0	0	1	0	0	2
NaN	1	1	NaN	1	1	1	NaN	0	NaN	1	1	1	1	1	1	1	1	1	1	1	0	1	1	0	NaN	1	1	1	1	1	1	0	1	1	0	1	1	0	1	0	1	0	1	3
NaN	1	1	NaN	1	1	1	NaN	0	NaN	1	1	1	1	1	1	1	1	1	1	1	0	1	1	0	NaN	1	1	1	0	1	1	0	1	0	0	1	1	1	1	0	1	0	1	3
NaN	1	1	NaN	1	1	1	NaN	0	NaN	1	1	1	1	1	1	1	1	1	1	1	0	1	1	0	NaN	1	1	1	0	1	1	1	0	1	0	1	1	1	0	0	1	0	1	3
NaN	1	1	NaN	1	1	1	NaN	0	NaN	1	1	1	1	1	1	1	1	1	1	1	0	1	1	0	NaN	1	1	1	0	1	1	1	0	0	1	1	1	1	0	1	1	0	1	4
NaN	1	1	NaN	1	1	1	NaN	0	NaN	1	1	1	1	1	1	1	1	1	1	1	0	1	1	0	NaN	1	1	1	1	1	1	1	0	1	0	0	1	1	1	0	1	1	1	2
NaN	1	1	NaN	1	1	1	NaN	0	NaN	1	1	1	1	1	1	1	1	1	1	1	0	1	1	0	NaN	1	1	1	0	1	1	0	0	0	0	1	0	1	0	0	1	0	0	2
NaN	1	1	NaN	1	1	1	NaN	0	NaN	1	1	1	1	1	1	1	1	1	1	1	0	1	1	0	NaN	1	1	1	1	1	1	1	0	1	0	1	1	0	1	0	1	0	1	3
NaN	1	1	NaN	1	1	1	NaN	0	NaN	1	1	1	1	1	1	1	1	1	1	1	0	1	1	0	NaN	1	1	1	0	1	1	1	0	0	0	1	1	1	1	0	1	0	1	3
NaN	1	1	NaN	1	1	1	NaN	0	NaN	1	1	1	1	1	1	1	1	1	1	1	0	1	1	0	NaN	1	1	1	0	1	1	1	1	1	1	1	1	1	0	1	1	0	1	4
NaN	1	1	NaN	1	1	1	NaN	0	NaN	1	1	1	1	1	1	1	1	1	1	1	0	1	1	0	NaN	1	1	1	1	1	1	0	1	1	0	0	0	1	1	0	1	1	0	1
NaN	1	1	NaN	1	1	1	NaN	0	NaN	1	1	1	1	1	1	1	1	1	1	1	0	1	1	0	NaN	1	1	1	0	1	1	0	1	1	0	1	0	1	0	0	1	0	0	2
NaN	1	1	NaN	1	1	1	NaN	0	NaN	1	1	1	1	1	1	1	1	1	1	1	0	1	1	0	NaN	1	1	1	1	1	1	1	1	1	0	1	1	0	1	0	1	0	1	3
NaN	1	1	NaN	1	1	1	NaN	0	NaN	1	1	1	1	1	1	1	1	1	1	1	0	1	1	0	NaN	1	1	1	0	1	1	1	1	1	0	1	1	1	1	0	1	0	1	3
NaN	1	1	NaN	1	1	1	NaN	0	NaN	1	1	1	1	1	1	1	1	1	1	1	0	1	1	0	NaN	1	1	1	1	1	1	0	1	1	1	0	0	1	1	1	1	1	0	2
NaN	1	1	NaN	1	1	1	NaN	0	NaN	1	1	1	1	1	1	1	1	1	1	1	0	1	1	0	NaN	1	1	1	0	1	1	0	1	0	1	1	0	1	0	1	1	0	0	3
NaN	1	1	NaN	1	1	1	NaN	0	NaN	1	1	1	1	1	1	1	1	1	1	1	0	1	1	0	NaN	1	1	1	1	1	1	1	1	1	1	1	1	0	1	1	1	0	1	4
NaN	1	1	NaN	1	1	1	NaN	0	NaN	1	1	1	1	1	1	1	1	1	1	1	0	1	1	0	NaN	1	1	1	0	1	1	1	1	0	1	1	1	1	1	1	1	0	1	4
NaN	1	1	NaN	1	1	1	NaN	0	NaN	1	1	1	1	1	1	1	1	1	1	1	0	1	1	0	NaN	1	1	1	1	1	1	0	1	1	0	0	0	1	1	0	1	1	0	1
NaN	1	1	NaN	1	1	1	NaN	0	NaN	1	1	1	1	1	1	1	1	1	1	1	0	1	1	0	NaN	1	1	1	1	1	1	0	1	1	0	0	0	0	1	0	1	1	0	1
NaN	1	1	NaN	1	1	1	NaN	0	NaN	1	1	1	1	1	1	1	1	1	1	1	0	1	1	0	NaN	1	1	1	1	1	1	0	1	1	0	0	0	1	1	0	1	1	0	1
NaN	1	1	NaN	1	1	1	NaN	0	NaN	1	1	1	1	1	1	1	1	1	1	1	0	1	1	0	NaN	1	1	1	1	1	1	0	1	1	0	1	0	0	1	0	1	0	0	2
NaN	1	1	NaN	1	1	1	NaN	0	NaN	1	1	1	1	1	1	1	1	1	1	1	0	1	1	0	NaN	1	1	1	0	1	1	0	1	0	0	1	0	1	1	0	1	0	0	2
NaN	1	1	NaN	1	1	1	NaN	0	NaN	1	1	1	1	1	1	1	1	1	1	1	0	1	1	0	NaN	1	1	1	1	1	1	1	1	1	0	1	1	0	1	0	1	0	1	3

## Sheet: Perturbed nodes_EMT 1
Input										Regulatory network																																		Output
AR	ESR1	FGFR1	FLT4	NR2F2	NR4A1	TGFBR1	TGFBR2	THRA	THRB	CCNB1	CDK1	PPP2R1B	CDC20	CCNA2	PPP2R2A	CCNE2	CDKN2A	RB1	BCL2	CDK2	PPP2R1A	E2F2	MDM4	PPP2R2D	E2F3	KIAA1524	E2F1	MDM2	TP53	MYC	SP1	LEF1	AXIN2	hsa-miR-205-5p	AKT1	hsa-miR-25-3p	CTNNB1	SIRT1	FOXO3	VIM	ZEB1	CDH1	SNAI1	EMT
NaN	1	1	NaN	1	1	1	NaN	0	NaN	1	1	1	1	1	1	1	1	1	1	1	0	1	1	0	NaN	1	1	1	0	1	1	1	1	0	0	1	1	1	0	0	1	0	1	3
NaN	1	1	NaN	1	1	1	NaN	0	NaN	0	1	1	1	1	1	1	1	1	1	1	0	1	0	0	NaN	1	1	0	1	1	1	0	1	1	0	1	0	1	1	0	1	1	0	1
NaN	1	1	NaN	1	1	1	NaN	0	NaN	0	1	1	1	1	1	1	1	1	1	1	0	1	1	0	NaN	1	1	0	1	1	1	0	1	1	0	1	0	1	1	0	1	1	0	1
NaN	1	1	NaN	1	1	1	NaN	0	NaN	0	1	1	1	1	1	1	1	1	1	1	0	1	1	0	NaN	1	1	1	1	1	1	0	1	1	0	0	0	1	1	0	1	1	0	1
NaN	1	1	NaN	1	1	1	NaN	0	NaN	1	1	1	0	1	1	1	1	1	1	1	0	1	0	0	NaN	1	1	0	1	1	1	0	1	1	0	1	0	1	1	0	1	1	0	1
NaN	1	1	NaN	1	1	1	NaN	0	NaN	1	1	1	0	1	1	1	1	1	1	1	0	1	1	0	NaN	1	1	0	1	1	1	0	1	1	0	1	0	1	1	0	1	1	0	1
NaN	1	1	NaN	1	1	1	NaN	0	NaN	1	1	1	0	1	1	1	1	1	1	1	0	1	1	0	NaN	1	1	1	1	1	1	0	1	1	0	0	0	1	1	0	1	1	0	1
NaN	1	1	NaN	1	1	1	NaN	0	NaN	1	1	1	1	0	1	1	1	1	1	1	0	1	0	0	NaN	1	1	0	1	1	1	0	1	1	0	1	0	1	1	0	1	1	0	1
NaN	1	1	NaN	1	1	1	NaN	0	NaN	1	1	1	1	0	1	1	1	1	1	1	0	1	1	0	NaN	1	1	0	1	1	1	0	1	1	0	1	0	1	1	0	1	1	0	1
NaN	1	1	NaN	1	1	1	NaN	0	NaN	1	1	1	1	0	1	1	1	1	1	1	0	1	1	0	NaN	1	1	1	1	1	1	0	1	1	0	0	0	1	1	0	1	1	0	1
NaN	1	1	NaN	1	1	1	NaN	0	NaN	1	1	1	1	1	1	0	1	1	1	1	0	1	0	0	NaN	1	1	0	1	1	1	0	1	1	0	1	0	1	1	0	1	1	0	1
NaN	1	1	NaN	1	1	1	NaN	0	NaN	1	1	1	1	1	1	0	1	1	1	1	0	1	1	0	NaN	1	1	0	1	1	1	0	1	1	0	1	0	1	1	0	1	1	0	1
NaN	1	1	NaN	1	1	1	NaN	0	NaN	1	1	1	1	1	1	0	1	1	1	1	0	1	1	0	NaN	1	1	1	1	1	1	0	1	1	0	0	0	1	1	0	1	1	0	1
NaN	1	1	NaN	1	1	1	NaN	0	NaN	1	1	1	1	1	1	1	0	1	1	1	0	1	1	0	NaN	1	1	0	1	1	1	0	1	1	0	1	0	1	1	0	1	1	0	1
NaN	1	1	NaN	1	1	1	NaN	0	NaN	1	1	1	1	1	1	1	0	1	1	1	0	1	1	0	NaN	1	1	1	1	1	1	0	1	1	0	0	0	1	1	0	1	1	0	1
NaN	1	1	NaN	1	1	1	NaN	0	NaN	1	1	1	1	1	1	1	1	0	1	1	0	1	0	0	NaN	1	1	0	1	1	1	0	1	1	0	1	0	1	1	0	1	1	0	1
NaN	1	1	NaN	1	1	1	NaN	0	NaN	1	1	1	1	1	1	1	1	0	1	1	0	1	1	0	NaN	1	1	0	1	1	1	0	1	1	0	1	0	1	1	0	1	1	0	1
NaN	1	1	NaN	1	1	1	NaN	0	NaN	1	1	1	1	1	1	1	1	0	1	1	0	1	1	0	NaN	1	1	1	1	1	1	0	1	1	0	0	0	1	1	0	1	1	0	1
NaN	1	1	NaN	1	1	1	NaN	0	NaN	1	1	1	1	1	1	1	1	1	0	1	0	1	0	0	NaN	1	1	0	1	1	1	0	1	1	0	1	0	1	1	0	1	1	0	1
NaN	1	1	NaN	1	1	1	NaN	0	NaN	1	1	1	1	1	1	1	1	1	0	1	0	1	1	0	NaN	1	1	0	1	1	1	0	1	1	0	1	0	1	1	0	1	1	0	1
NaN	1	1	NaN	1	1	1	NaN	0	NaN	1	1	1	1	1	1	1	1	1	0	1	0	1	1	0	NaN	1	1	1	1	1	1	0	1	1	0	0	0	1	1	0	1	1	0	1
NaN	1	1	NaN	1	1	1	NaN	0	NaN	1	1	1	1	1	1	1	1	1	1	0	0	1	0	0	NaN	1	1	0	1	1	1	0	1	1	0	1	0	1	1	0	1	1	0	1
NaN	1	1	NaN	1	1	1	NaN	0	NaN	1	1	1	1	1	1	1	1	1	1	0	0	1	1	0	NaN	1	1	0	1	1	1	0	1	1	0	1	0	1	1	0	1	1	0	1
NaN	1	1	NaN	1	1	1	NaN	0	NaN	1	1	1	1	1	1	1	1	1	1	0	0	1	1	0	NaN	1	1	1	1	1	1	0	1	1	0	0	0	1	1	0	1	1	0	1
NaN	1	1	NaN	1	1	1	NaN	0	NaN	1	1	1	1	1	1	1	1	1	1	1	1	1	0	0	NaN	1	1	0	1	1	1	0	1	1	0	1	0	1	1	0	1	1	0	1
NaN	1	1	NaN	1	1	1	NaN	0	NaN	1	1	1	1	1	1	1	1	1	1	1	1	1	1	0	NaN	1	1	0	1	1	1	0	1	1	0	1	0	1	1	0	1	1	0	1
NaN	1	1	NaN	1	1	1	NaN	0	NaN	1	1	1	1	1	1	1	1	1	1	1	1	1	1	0	NaN	1	1	1	1	1	1	0	1	1	0	0	0	1	1	0	1	1	0	1
NaN	1	1	NaN	1	1	1	NaN	0	NaN	1	1	1	1	1	1	1	1	1	1	1	0	0	0	0	NaN	1	1	0	1	1	1	0	1	1	0	1	0	1	1	0	1	1	0	1
NaN	1	1	NaN	1	1	1	NaN	0	NaN	1	1	1	1	1	1	1	1	1	1	1	0	0	1	0	NaN	1	1	0	1	1	1	0	1	1	0	1	0	1	1	0	1	1	0	1
NaN	1	1	NaN	1	1	1	NaN	0	NaN	1	1	1	1	1	1	1	1	1	1	1	0	0	1	0	NaN	1	1	1	1	1	1	0	1	1	0	0	0	1	1	0	1	1	0	1
NaN	1	1	NaN	1	1	1	NaN	0	NaN	1	1	1	1	1	1	1	1	1	1	1	0	1	0	1	NaN	1	1	0	1	1	1	0	1	1	0	1	0	1	1	0	1	1	0	1
NaN	1	1	NaN	1	1	1	NaN	0	NaN	1	1	1	1	1	1	1	1	1	1	1	1	1	0	1	NaN	0	1	0	1	1	1	0	1	1	0	1	0	1	1	0	1	1	0	1
NaN	1	1	NaN	1	1	1	NaN	0	NaN	1	1	1	1	1	1	1	1	1	1	1	0	1	0	0	NaN	1	1	0	1	1	1	0	1	1	0	1	0	1	1	0	1	1	0	1
NaN	1	1	NaN	1	1	1	NaN	0	NaN	1	1	1	1	1	1	1	1	1	1	1	0	1	0	0	NaN	1	1	0	1	1	1	0	1	1	0	1	0	1	1	0	1	1	0	1
NaN	1	1	NaN	1	1	1	NaN	0	NaN	1	1	1	1	1	1	1	1	1	1	1	0	1	0	0	NaN	1	1	0	1	0	1	0	1	1	0	1	0	1	1	0	1	1	0	1
NaN	1	1	NaN	1	1	1	NaN	0	NaN	1	1	1	1	1	1	1	1	1	1	1	0	1	0	0	NaN	1	1	0	1	1	0	0	1	1	0	1	0	1	1	0	1	1	0	1
NaN	1	1	NaN	1	1	1	NaN	0	NaN	1	1	1	1	1	1	1	1	1	1	1	0	1	0	0	NaN	1	1	0	1	1	1	0	1	1	0	1	0	1	1	0	1	1	0	1
NaN	1	1	NaN	1	1	1	NaN	0	NaN	1	1	1	1	1	1	1	1	1	1	1	0	1	0	0	NaN	1	1	0	1	1	1	0	1	1	0	1	0	1	1	0	1	1	0	1
NaN	1	1	NaN	1	1	1	NaN	0	NaN	1	1	1	1	1	1	1	1	1	1	1	0	1	0	0	NaN	1	1	1	1	1	1	0	1	1	0	0	0	1	1	0	1	1	0	1
NaN	1	1	NaN	1	1	1	NaN	0	NaN	1	1	1	1	1	1	1	1	1	1	1	0	1	0	0	NaN	1	1	0	1	1	1	0	1	1	0	1	0	1	1	0	1	1	0	1
NaN	1	1	NaN	1	1	1	NaN	0	NaN	1	1	1	1	1	1	1	1	1	1	1	0	1	0	0	NaN	1	1	0	1	1	1	0	1	1	0	1	0	0	1	0	1	1	0	1
NaN	1	1	NaN	1	1	1	NaN	0	NaN	1	1	1	1	1	1	1	1	1	1	1	0	1	0	0	NaN	1	1	0	1	1	1	0	1	1	0	1	0	1	1	0	1	1	0	1
NaN	1	1	NaN	1	1	1	NaN	0	NaN	1	1	1	1	1	1	1	1	1	1	1	0	1	1	1	NaN	1	1	0	1	1	1	0	1	1	0	1	0	1	1	0	1	1	0	1
NaN	1	1	NaN	1	1	1	NaN	0	NaN	1	1	1	1	1	1	1	1	1	1	1	0	1	1	1	NaN	1	1	1	1	1	1	0	1	1	0	0	0	1	1	0	1	1	0	1
NaN	1	1	NaN	1	1	1	NaN	0	NaN	1	1	1	1	1	1	1	1	1	1	1	1	1	1	1	NaN	0	1	0	1	1	1	0	1	1	0	1	0	1	1	0	1	1	0	1
NaN	1	1	NaN	1	1	1	NaN	0	NaN	1	1	1	1	1	1	1	1	1	1	1	1	1	1	1	NaN	0	1	1	1	1	1	0	1	1	0	0	0	1	1	0	1	1	0	1
NaN	1	1	NaN	1	1	1	NaN	0	NaN	1	1	1	1	1	1	1	1	1	1	1	0	1	1	0	NaN	1	1	0	1	1	1	0	1	1	0	1	0	1	1	0	1	1	0	1
NaN	1	1	NaN	1	1	1	NaN	0	NaN	1	1	1	1	1	1	1	1	1	1	1	0	1	1	0	NaN	1	1	0	1	0	1	0	1	1	0	1	0	1	1	0	1	1	0	1
NaN	1	1	NaN	1	1	1	NaN	0	NaN	1	1	1	1	1	1	1	1	1	1	1	0	1	1	0	NaN	1	1	0	1	1	0	0	1	1	0	1	0	1	1	0	1	1	0	1
NaN	1	1	NaN	1	1	1	NaN	0	NaN	1	1	1	1	1	1	1	1	1	1	1	0	1	1	0	NaN	1	1	0	1	1	1	0	1	1	0	1	0	1	1	0	1	1	0	1
NaN	1	1	NaN	1	1	1	NaN	0	NaN	1	1	1	1	1	1	1	1	1	1	1	0	1	1	0	NaN	1	1	0	1	1	1	0	1	1	0	1	0	1	1	0	1	1	0	1
NaN	1	1	NaN	1	1	1	NaN	0	NaN	1	1	1	1	1	1	1	1	1	1	1	0	1	1	0	NaN	1	1	0	1	1	1	0	1	1	0	0	0	1	1	0	1	1	0	1
NaN	1	1	NaN	1	1	1	NaN	0	NaN	1	1	1	1	1	1	1	1	1	1	1	0	1	1	0	NaN	1	1	0	1	1	1	0	1	1	0	1	0	1	1	0	1	1	0	1
NaN	1	1	NaN	1	1	1	NaN	0	NaN	1	1	1	1	1	1	1	1	1	1	1	0	1	1	0	NaN	1	1	0	1	1	1	0	1	1	0	1	0	0	1	0	1	1	0	1
NaN	1	1	NaN	1	1	1	NaN	0	NaN	1	1	1	1	1	1	1	1	1	1	1	0	1	1	0	NaN	1	1	0	1	1	1	0	1	1	0	1	0	1	1	0	1	1	0	1
NaN	1	1	NaN	1	1	1	NaN	0	NaN	1	1	1	1	1	1	1	1	1	1	1	0	1	1	0	NaN	1	1	1	1	1	1	0	1	1	0	0	0	1	1	0	1	1	0	1
NaN	1	1	NaN	1	1	1	NaN	0	NaN	1	1	1	1	1	1	1	1	1	1	1	0	1	1	0	NaN	1	1	1	1	0	1	0	1	1	0	0	0	1	1	0	1	1	0	1
NaN	1	1	NaN	1	1	1	NaN	0	NaN	1	1	1	1	1	1	1	1	1	1	1	0	1	1	0	NaN	1	1	1	1	1	0	0	1	1	0	0	0	1	1	0	1	1	0	1
NaN	1	1	NaN	1	1	1	NaN	0	NaN	1	1	1	1	1	1	1	1	1	1	1	0	1	1	0	NaN	1	1	1	1	1	1	0	1	1	0	0	0	1	1	0	1	1	0	1
NaN	1	1	NaN	1	1	1	NaN	0	NaN	1	1	1	1	1	1	1	1	1	1	1	0	1	1	0	NaN	1	1	1	1	1	1	0	1	1	0	0	0	1	1	0	1	1	0	1
NaN	1	1	NaN	1	1	1	NaN	0	NaN	1	1	1	1	1	1	1	1	1	1	1	0	1	1	0	NaN	1	1	1	1	1	1	0	1	1	0	0	0	1	1	0	1	1	0	1
NaN	1	1	NaN	1	1	1	NaN	0	NaN	1	1	1	1	1	1	1	1	1	1	1	0	1	1	0	NaN	1	1	1	1	1	1	0	1	1	0	0	0	0	1	0	1	1	0	1
NaN	1	1	NaN	1	1	1	NaN	0	NaN	1	1	1	1	1	1	1	1	1	1	1	0	1	1	0	NaN	1	1	1	1	1	1	0	1	1	0	0	0	1	1	0	1	1	0	1
											Perturbed node
