# Supplementary material
Source: Preprints.org preprint supplement (doi:10.20944/preprints202108.0327.v2)
Supplement: Supplementary file 3 [file Supplementary file 3.xlsx]

## Sheet: AKT1_hits
Prediction of ADMET, pharmacokinetic, drug-likeness, and medicinal friendliness score of compound hits docked to AKT1.
zinc_id	smiles	Formula	Physicochemical properties									Lipophilicity						Water solubility												Pharmacokinetics									Drug-likeness						Medicinal Chemistry
			MW	#Heavy atoms	#Aromatic heavy atoms	Fraction Csp3	#Rotatable bonds	#H-bond acceptors	#H-bond donors	MR	TPSA	iLOGP	XLOGP3	WLOGP	MLOGP	Silicos-IT Log P	Consensus Log P	ESOL Log S	ESOL Solubility (mg/ml)	ESOL Solubility (mol/l)	ESOL Class	Ali Log S	Ali Solubility (mg/ml)	Ali Solubility (mol/l)	Ali Class	Silicos-IT LogSw	Silicos-IT Solubility (mg/ml)	Silicos-IT Solubility (mol/l)	Silicos-IT class	GI absorption	BBB permeant	Pgp substrate	CYP1A2 inhibitor	CYP2C19 inhibitor	CYP2C9 inhibitor	CYP2D6 inhibitor	CYP3A4 inhibitor	log Kp (cm/s)	Lipinski #violations	Ghose #violations	Veber #violations	Egan #violations	Muegge #violations	Bioavailability Score	PAINS #alerts	Brenk #alerts	Leadlikeness #violations	Synthetic Accessibility
ZINC000001667535	Nc1ccc(S(=O)(=O)Nc2nncs2)cc1	C8H8N4O2S2	256.3	16	11	0	3	4	2	61.43	134.59	1.2	0.54	1.82	-0.37	0.47	0.73	-2.08	2.13	0.00832	Soluble	-2.94	0.296	0.00115	Soluble	-3.06	0.223	0.000869	Soluble	High	No	No	No	No	No	No	No	-7.48	0	0	0	1	0	0.55	0	1	0	2.96
ZINC000002043204	O=S(=O)(NCCNC/C=C/c1ccc(Br)cc1)c1cccc2cnccc12	C20H20BrN3O2S	446.36	27	16	0.15	8	5	2	112.17	79.47	3.28	3.47	4.55	2.17	3.61	3.42	-4.7	0.00882	1.98e-05	Moderately soluble	-4.82	0.00674	1.51e-05	Moderately soluble	-8.28	2.34e-06	5.24e-09	Poorly soluble	High	No	No	Yes	Yes	Yes	Yes	Yes	-6.56	0	0	0	0	0	0.55	0	0	2	3.06
ZINC000002121596	CC1=C(C#N)c2nc(N)c(C#N)c(C)c2/C1=C/c1ccc(-c2ccc(C(=O)O)c(Cl)c2)o1	C24H15ClN4O3	442.85	32	17	0.08	3	6	2	120.7	136.93	2.71	3.83	5.21	1.84	5.11	3.74	-5.19	0.00283	6.4e-06	Moderately soluble	-6.4	0.000176	3.97e-07	Poorly soluble	-7.56	1.21e-05	2.74e-08	Poorly soluble	Low	No	No	No	Yes	Yes	No	No	-6.28	0	0	0	1	0	0.56	1	0	2	3.87
ZINC000003818055	COc1ccc(O)c(C(=O)c2ccc(C(=O)N[C@@H]3CCCNC[C@H]3NC(=O)c3ccncc3)cc2)c1F	C27H27FN4O5	506.53	37	18	0.26	9	8	4	136.74	129.65	3.26	2.9	2.49	1.01	3.25	2.58	-4.57	0.0135	2.67e-05	Moderately soluble	-5.28	0.00264	5.21e-06	Moderately soluble	-7.91	6.19e-06	1.22e-08	Poorly soluble	High	No	Yes	No	No	Yes	Yes	Yes	-7.33	1	2	0	0	0	0.55	0	0	2	4.07
ZINC000003819033	O=c1[nH]c2ccccc2n1C1CCN(Cc2ccc(-c3nc4ccccc4nc3-c3ccccc3)cc2)CC1	C33H29N5O	511.62	39	31	0.18	5	4	1	161.01	66.81	4.12	5.44	5.91	4.19	5.99	5.13	-6.7	0.000103	2.01e-07	Poorly soluble	-6.6	0.000129	2.52e-07	Poorly soluble	-11.18	3.37e-09	6.59e-12	Insoluble	High	No	No	Yes	No	No	No	No	-5.56	2	3	0	1	1	0.17	0	0	2	4.1
ZINC000003819035	O=c1[nH]c2ccccc2n1C1CCN(Cc2ccc(-c3cc4ccccc4nc3-c3ccccc3)cc2)CC1	C34H30N4O	510.63	39	31	0.18	5	3	1	163.21	53.92	4.45	6.39	6.52	4.92	6.57	5.77	-7.29	2.62e-05	5.13e-08	Poorly soluble	-7.31	2.48e-05	4.85e-08	Poorly soluble	-11.55	1.42e-09	2.79e-12	Insoluble	High	No	No	Yes	No	No	No	No	-4.88	2	3	0	1	1	0.17	0	0	2	4.11
ZINC000003819038	O=c1cnc(-c2ccc(CN3CCC(n4c(=O)[nH]c5ccccc54)CC3)cc2)c(-c2ccccc2)[nH]1	C29H27N5O2	477.56	36	27	0.21	5	4	2	146.33	86.78	3.29	3.47	4.05	3.01	5.14	3.79	-5.21	0.00293	6.14e-06	Moderately soluble	-4.97	0.00507	1.06e-05	Moderately soluble	-9.45	1.69e-07	3.54e-10	Poorly soluble	High	No	Yes	No	Yes	Yes	No	Yes	-6.75	0	1	0	0	0	0.55	0	0	1	4.02
ZINC000003819040	Cc1nc(-c2ccc(CN3CCC(n4c(=O)[nH]c5ccccc54)CC3)cc2)c(-c2ccccc2)[nH]c1=O	C30H29N5O2	491.58	37	27	0.23	5	4	2	151.29	86.78	3.57	3.46	4.36	3.2	5.66	4.05	-5.28	0.00259	5.28e-06	Moderately soluble	-4.96	0.00534	1.09e-05	Moderately soluble	-9.82	7.39e-08	1.5e-10	Poorly soluble	High	No	Yes	No	Yes	Yes	No	Yes	-6.84	0	2	0	0	0	0.55	0	0	1	4.24
ZINC000003819041	Cc1nc(-c2ccccc2)c(-c2ccc(CN3CCC(n4c(=O)[nH]c5ccccc54)CC3)cc2)[nH]c1=O	C30H29N5O2	491.58	37	27	0.23	5	4	2	151.29	86.78	3.69	3.46	4.36	3.2	5.66	4.08	-5.28	0.00259	5.28e-06	Moderately soluble	-4.96	0.00534	1.09e-05	Moderately soluble	-9.82	7.39e-08	1.5e-10	Poorly soluble	High	No	Yes	No	Yes	Yes	No	Yes	-6.84	0	2	0	0	0	0.55	0	0	1	4.24
ZINC000003874586	O=C1Nc2ccccc2/C1=C/c1ccc[nH]1	C13H10N2O	210.23	16	11	0	1	1	2	66.49	44.89	1.88	1.72	1.83	1.43	2.99	1.97	-2.67	0.45	0.00214	Soluble	-2.28	1.11	0.00526	Soluble	-4.65	0.00467	2.22e-05	Moderately soluble	High	Yes	No	Yes	Yes	No	No	No	-6.36	0	0	0	0	0	0.55	0	1	1	2.29
ZINC000003917937	Nc1nc(N)c2cc(-c3ccccc3)c(-c3ccc(CN4CCC(n5c(=O)[nH]c6ccccc65)CC4)cc3)nc2n1	C32H30N8O	542.63	41	31	0.19	5	5	3	167.61	131.74	3.58	4.31	4.49	3.39	3.97	3.95	-6.15	0.000385	7.09e-07	Poorly soluble	-6.79	8.8e-05	1.62e-07	Poorly soluble	-10.05	4.79e-08	8.83e-11	Insoluble	Low	No	Yes	Yes	Yes	No	No	No	-6.55	1	3	0	1	0	0.55	0	0	2	4.4
ZINC000003925808	O=C(O)c1ccc2nc(-c3ccccc3)c(-c3ccc(CN4CCC(n5c(=O)[nH]c6ccccc65)CC4)cc3)nc2c1	C34H29N5O3	555.63	42	31	0.18	6	6	2	167.97	104.11	4.02	2.69	5.61	3.8	5.45	4.31	-5.13	0.00412	7.42e-06	Moderately soluble	-4.53	0.0164	2.96e-05	Moderately soluble	-10.5	1.75e-08	3.15e-11	Insoluble	Low	No	Yes	Yes	No	Yes	No	No	-7.78	1	4	0	0	0	0.55	0	0	1	4.23
ZINC000003925810	O=C(O)c1ccc2nc(-c3ccc(CN4CCC(n5c(=O)[nH]c6ccccc65)CC4)cc3)c(-c3ccccc3)nc2c1	C34H29N5O3	555.63	42	31	0.18	6	6	2	167.97	104.11	4.03	2.69	5.61	3.8	5.45	4.32	-5.13	0.00412	7.42e-06	Moderately soluble	-4.53	0.0164	2.96e-05	Moderately soluble	-10.5	1.75e-08	3.15e-11	Insoluble	Low	No	Yes	Yes	No	Yes	No	No	-7.78	1	4	0	0	0	0.55	0	0	1	4.23
ZINC000003925816	CCN(CC)CCNC(=O)c1ccc2nc(-c3ccc(CN4CCC(n5c(=O)[nH]c6ccccc65)CC4)cc3)c(-c3ccccc3)nc2c1	C40H43N7O2	653.82	49	31	0.3	12	6	2	200.93	99.15	5.79	5.49	5.98	3.67	6.5	5.49	-7.03	6.12e-05	9.36e-08	Poorly soluble	-7.33	3.06e-05	4.67e-08	Poorly soluble	-12.73	1.23e-10	1.87e-13	Insoluble	Low	No	No	Yes	Yes	No	No	No	-6.39	1	4	1	1	2	0.55	0	0	3	5.1
ZINC000003925818	Cn1nnc(-c2ccc3nc(-c4ccccc4)c(-c4ccc(CN5CCC(n6c(=O)[nH]c7ccccc76)CC5)cc4)nc3c2)n1	C35H31N9O	593.68	45	36	0.2	6	7	1	179.08	110.41	4.81	5.3	5.1	3.56	4.76	4.71	-7.06	5.22e-05	8.79e-08	Poorly soluble	-7.37	2.53e-05	4.27e-08	Poorly soluble	-11.25	3.33e-09	5.61e-12	Insoluble	High	No	No	No	No	Yes	No	No	-6.16	1	3	0	0	2	0.55	0	0	2	4.67
ZINC000004216679	C[C@@H]1O[C@H]2OC(=O)O[C@H]2C2=C1C(=O)c1c(O)cccc1C2=O	C15H10O7	302.24	22	6	0.27	0	7	1	69.92	99.13	1.16	1.55	1.35	-0.08	1.3	1.05	-2.89	0.387	0.00128	Soluble	-3.24	0.173	0.000574	Soluble	-2.58	0.802	0.00265	Soluble	High	No	No	No	No	No	No	No	-7.04	0	0	0	0	0	0.55	1	0	0	4.15
ZINC000004846183	O=c1[nH]c2ccccc2n1C1CCN(Cc2ccc(-c3nc4cc5nc[nH]c5cc4nc3-c3ccccc3)cc2)CC1	C34H29N7O	551.64	42	34	0.18	5	5	2	170.66	95.49	3.58	5.01	5.79	3.6	5.91	4.78	-6.69	0.000114	2.06e-07	Poorly soluble	-6.76	9.69e-05	1.76e-07	Poorly soluble	-11.65	1.24e-09	2.25e-12	Insoluble	High	No	No	No	No	Yes	No	No	-6.11	1	4	0	0	2	0.55	0	0	2	4.25
ZINC000005760159	C[C@H]1O[C@@H]2CC(=O)O[C@@H]2C2=C1C(=O)c1c(ccc([C@H]3C[C@@H](N(C)C)[C@H](O)[C@@H](C)O3)c1O)C2=O	C24H27NO8	457.47	33	6	0.54	2	9	2	114.89	122.6	3.14	0.72	0.99	-0.4	1.42	1.17	-3.13	0.337	0.000737	Soluble	-2.87	0.613	0.00134	Soluble	-3.12	0.345	0.000753	Soluble	High	No	Yes	No	No	No	No	No	-8.58	0	0	0	0	0	0.55	1	0	1	5.53
ZINC000006718479	N[C@H](COc1cncc(-c2ccc3cnccc3c2)c1)Cc1c[nH]c2ccccc12	C25H22N4O	394.47	30	25	0.12	6	4	2	120.13	76.82	2.98	3.84	4.73	1.96	5.14	3.73	-4.93	0.00468	1.19e-05	Moderately soluble	-5.15	0.0028	7.09e-06	Moderately soluble	-9.41	1.52e-07	3.85e-10	Poorly soluble	High	No	Yes	No	Yes	Yes	Yes	Yes	-5.98	0	0	0	0	0	0.55	0	0	2	3.62
ZINC000006718674	Cc1n[nH]c2ccc(-c3cncc(OC[C@@H](N)Cc4ccc(Cl)c(F)c4)c3)cc12	C22H20ClFN4O	410.87	29	21	0.18	6	5	2	112.56	76.82	3.02	4.29	5.09	3.17	5.7	4.25	-5.23	0.00242	5.89e-06	Moderately soluble	-5.62	0.000994	2.42e-06	Moderately soluble	-9.01	4.04e-07	9.84e-10	Poorly soluble	High	No	Yes	Yes	Yes	Yes	Yes	Yes	-5.76	0	0	0	0	0	0.55	0	0	2	3.55
ZINC000006718675	Cc1n[nH]c2cnc(-c3cncc(OC[C@@H](N)Cc4cccc(C(F)(F)F)c4)c3)cc12	C22H20F3N5O	427.42	31	21	0.23	7	8	2	110.39	89.71	2.73	3.41	5.45	2.09	5.14	3.77	-4.68	0.00898	2.1e-05	Moderately soluble	-4.97	0.00454	1.06e-05	Moderately soluble	-8.61	1.05e-06	2.45e-09	Poorly soluble	High	No	Yes	Yes	Yes	Yes	Yes	Yes	-6.49	0	0	0	0	0	0.55	0	0	1	3.81
ZINC000006745071	CC1(COc2ccc(Cl)cc2NC(=O)Nc2cnc(C#N)cn2)COC1	C17H16ClN5O3	373.79	26	12	0.29	7	6	2	94.91	109.16	2.24	1.61	2.68	0.58	2.36	1.89	-3.05	0.332	0.000888	Soluble	-3.51	0.114	0.000306	Soluble	-5.96	0.000411	1.1e-06	Moderately soluble	High	No	Yes	Yes	No	Yes	No	Yes	-7.44	0	0	0	0	0	0.55	0	0	1	3.07
ZINC000008034928	CCCCCCCCCCCCCCCCCCOC[C@@H](CO[P@@](=O)(O)OCC[N+](C)(C)C)OC	C27H59NO6P	524.73	35	0	1	27	6	1	148.44	84.03	2.78	7.64	7.12	-0.43	7.06	4.83	-6.12	0.000394	7.51e-07	Poorly soluble	-9.24	2.99e-07	5.7e-10	Poorly soluble	-8.62	1.26e-06	2.41e-09	Poorly soluble	Low	No	No	No	No	No	No	Yes	-4.08	1	4	1	1	2	0.55	0	2	3	6.21
ZINC000008195621	CCCCCCCCCCCCCCCCCCOC[C@H](CO[P@@](=O)(O)OCC[N+](C)(C)C)OC	C27H59NO6P	524.73	35	0	1	27	6	1	148.44	84.03	2.91	7.64	7.12	-0.43	7.06	4.86	-6.12	0.000394	7.51e-07	Poorly soluble	-9.24	2.99e-07	5.7e-10	Poorly soluble	-8.62	1.26e-06	2.41e-09	Poorly soluble	Low	No	No	No	No	No	No	Yes	-4.08	1	4	1	1	2	0.55	0	2	3	6.21
ZINC000008214653	CCCCCCCCCCCCCCCCCCO[P@](=O)(O)OC1CC[N+](C)(C)CC1	C25H53NO4P	462.67	31	0	1	20	4	1	140.04	65.57	1.04	8.42	7.24	0.38	6.58	4.73	-6.69	9.38e-05	2.03e-07	Poorly soluble	-9.67	9.99e-08	2.16e-10	Poorly soluble	-7.92	5.54e-06	1.2e-08	Poorly soluble	Low	No	Yes	No	No	No	No	No	-3.14	0	3	1	1	2	0.55	0	2	3	4.8
ZINC000012369272	O=C1Nc2ccccc2/C1=C/c1c[nH]nc1-c1ccccc1[N+](=O)[O-]	C18H12N4O3	332.31	25	17	0	3	4	2	98.54	103.6	1.1	2.68	2.8	1.46	1.76	1.96	-3.89	0.0424	0.000128	Soluble	-4.51	0.0103	3.11e-05	Moderately soluble	-6.14	0.000239	7.19e-07	Poorly soluble	High	No	No	Yes	No	No	No	No	-6.42	0	0	0	0	0	0.55	0	3	0	3.02
ZINC000013559688	COc1ccc(O)c(C(=O)c2ccc(C(=O)O[C@@H]3CCCNC[C@H]3NC(=O)c3ccncc3)cc2)c1F	C27H26FN3O6	507.51	37	18	0.26	9	9	3	135.02	126.85	2.72	3.48	2.91	1.42	3.57	2.82	-4.94	0.00576	1.14e-05	Moderately soluble	-5.83	0.000757	1.49e-06	Moderately soluble	-7.6	1.27e-05	2.51e-08	Poorly soluble	High	No	Yes	No	No	Yes	Yes	Yes	-6.93	1	2	0	0	0	0.55	0	0	2	4.23
ZINC000013559689	COc1ccc(O)c(C(=O)c2ccc(CO[C@@H]3CCCNC[C@H]3NC(=O)c3ccncc3)cc2)c1F	C27H28FN3O5	493.53	36	18	0.3	9	8	3	134.6	109.78	3.13	3.28	3.12	1.19	4.02	2.95	-4.74	0.00893	1.81e-05	Moderately soluble	-5.26	0.00271	5.49e-06	Moderately soluble	-8.07	4.18e-06	8.47e-09	Poorly soluble	High	No	Yes	No	Yes	No	Yes	Yes	-6.98	0	2	0	0	0	0.55	0	0	2	4.24
ZINC000013559691	COc1ccc(O)c(C(=O)c2ccc(CN[C@@H]3CCCNC[C@H]3NC(=O)c3ccncc3)cc2)c1F	C27H29FN4O4	492.54	36	18	0.3	9	8	4	136.31	112.58	3.1	3	2.69	1.19	3.7	2.74	-4.56	0.0136	2.76e-05	Moderately soluble	-5.03	0.00461	9.37e-06	Moderately soluble	-8.38	2.03e-06	4.13e-09	Poorly soluble	High	No	Yes	No	Yes	No	Yes	Yes	-7.17	0	2	0	0	0	0.55	0	0	2	4.1
ZINC000013559692	COc1ccc(O)c(C(=O)c2ccc(/C=C/[C@@H]3CCCNC[C@H]3NC(=O)c3ccncc3)cc2)c1F	C28H28FN3O4	489.54	36	18	0.25	8	7	3	138.64	100.55	2.98	4.26	3.91	2.1	4.7	3.59	-5.4	0.00194	3.97e-06	Moderately soluble	-6.08	0.000404	8.25e-07	Poorly soluble	-8.02	4.66e-06	9.53e-09	Poorly soluble	High	No	Yes	No	Yes	Yes	Yes	Yes	-6.26	0	2	0	0	0	0.55	0	0	3	4.39
ZINC000013641346	O=C(/C=C/c1nc2ccccc2[nH]1)c1c(-c2ccccc2)c2cc(Cl)ccc2[nH]c1=O	C25H16ClN3O2	425.87	31	25	0	4	3	2	124.47	78.61	2.96	4.72	5.51	3.72	6.76	4.73	-5.79	0.000696	1.63e-06	Moderately soluble	-6.1	0.000338	7.94e-07	Poorly soluble	-9.71	8.34e-08	1.96e-10	Poorly soluble	High	No	No	No	Yes	No	No	No	-5.55	0	0	0	0	0	0.55	0	1	2	3.18
ZINC000013819719	C[C@H](N)COc1cnc(Cl)c(/C=C/c2ccncc2)c1	C15H16ClN3O	289.76	20	12	0.2	5	4	1	81.23	61.03	2.72	2.48	2.81	1.25	3.31	2.51	-3.31	0.141	0.000487	Soluble	-3.41	0.114	0.000392	Soluble	-5.09	0.00235	8.11e-06	Moderately soluble	High	Yes	No	No	Yes	No	No	No	-6.31	0	0	0	0	0	0.55	0	1	0	3.34
ZINC000013983995	Cc1n[nH]c2ccc(-c3cc(OC[C@@H](N)Cc4ccccc4)cnc3-c3ccccc3)cc12	C28H26N4O	434.53	33	27	0.14	7	4	2	133.03	76.82	3.38	5.22	5.55	3.34	6.21	4.74	-5.97	0.00047	1.08e-06	Moderately soluble	-6.58	0.000114	2.62e-07	Poorly soluble	-10.61	1.08e-08	2.48e-11	Insoluble	High	No	Yes	No	No	Yes	Yes	Yes	-5.24	0	1	0	0	1	0.55	0	0	2	3.94
ZINC000013987191	Cc1c(NCCN(C)C)cc(Cl)cc1N1CCN(c2ncnc3[nH]nc(Br)c23)CC1	C20H26BrClN8	493.83	30	15	0.45	6	4	2	132.48	76.21	3.5	4.26	2.42	2.54	2.84	3.11	-5.56	0.00136	2.76e-06	Moderately soluble	-5.57	0.00132	2.68e-06	Moderately soluble	-7.12	3.74e-05	7.57e-08	Poorly soluble	High	Yes	No	No	Yes	Yes	Yes	Yes	-6.29	0	2	0	0	0	0.55	0	0	2	3.44
ZINC000013998530	CCn1c(-c2nonc2N)nc2cncc(CNC3CCNCC3)c21	C16H22N8O	342.4	25	14	0.5	5	7	3	97.7	119.71	2.71	-0.66	0.4	0.18	0.62	0.65	-1.63	8	0.0234	Very soluble	-1.38	14.3	0.0417	Very soluble	-4.76	0.0059	1.72e-05	Moderately soluble	High	No	Yes	Yes	No	No	No	No	-8.86	0	0	0	0	0	0.55	0	0	0	3.29
ZINC000014127874	CCCCCCCCCCCCCCCCCCOC[C@H](CO[P@@](=O)(O)O[C@@H]1[C@H](O)C[C@@H](O)[C@H](O)[C@H]1O)OC	C28H57O10P	584.72	39	0	1	25	10	5	153.41	164.95	5.02	5.31	4.63	0.72	4.69	4.07	-5.16	0.00404	6.91e-06	Moderately soluble	-8.53	1.74e-06	2.98e-09	Poorly soluble	-4.73	0.0108	1.85e-05	Moderately soluble	Low	No	No	No	Yes	No	No	No	-6.1	1	3	2	1	3	0.11	0	1	3	7.39
ZINC000014762763	CC(C)=CCc1c(O)cc(O)c2c(=O)cc(-c3ccc(O)c(O)c3)oc12	C20H18O6	354.35	26	16	0.15	3	6	4	99.73	111.13	2.53	4.46	3.79	1.09	3.73	3.12	-5.1	0.00279	7.87e-06	Moderately soluble	-6.51	0.000109	3.07e-07	Poorly soluble	-5.05	0.00312	8.81e-06	Moderately soluble	High	No	No	Yes	No	Yes	Yes	No	-5.29	0	0	0	0	0	0.55	1	2	2	3.62
ZINC000014954335	CCn1c(-c2nonc2N)nc2cnc(Oc3cccc(NC(=O)c4ccc(OCCN5CCOCC5)cc4)c3)cc21	C29H30N8O5	570.6	42	26	0.28	11	10	2	158.33	155.68	4.58	2.18	3.28	1.34	2.27	2.73	-4.48	0.0188	3.29e-05	Moderately soluble	-5.08	0.00472	8.27e-06	Moderately soluble	-8.38	2.38e-06	4.17e-09	Poorly soluble	Low	No	Yes	Yes	Yes	Yes	Yes	Yes	-8.23	2	3	2	1	1	0.17	0	0	2	4.39
ZINC000014957379	N[C@H](COc1cncc(/C=C/c2ccncc2)c1)Cc1ccccc1	C21H21N3O	331.41	25	18	0.14	7	4	1	100.7	61.03	3.21	3.1	3.38	1.92	4.17	3.16	-3.92	0.04	0.000121	Soluble	-4.05	0.0296	8.92e-05	Moderately soluble	-6.99	3.41e-05	1.03e-07	Poorly soluble	High	Yes	Yes	No	Yes	Yes	Yes	Yes	-6.12	0	0	0	0	0	0.55	0	0	0	3.41
ZINC000014957382	N[C@H](COc1cncc(/C=C/c2ccncc2)c1)Cc1c[nH]c2ccccc12	C23H22N4O	370.45	28	21	0.13	7	4	2	112.56	76.82	2.79	3.23	3.86	1.65	4.72	3.25	-4.26	0.0201	5.44e-05	Moderately soluble	-4.52	0.0113	3.05e-05	Moderately soluble	-7.85	5.26e-06	1.42e-08	Poorly soluble	High	Yes	Yes	No	Yes	Yes	Yes	Yes	-6.27	0	0	0	0	0	0.55	0	0	1	3.66
ZINC000014957386	N[C@H](COc1cncc(C#Cc2ccncc2)c1)Cc1c[nH]c2ccccc12	C23H20N4O	368.43	28	21	0.13	5	4	2	109.61	76.82	2.94	2.98	3.39	1.65	4.57	3.11	-4.23	0.0219	5.93e-05	Moderately soluble	-4.26	0.0204	5.54e-05	Moderately soluble	-7.84	5.3e-06	1.44e-08	Poorly soluble	High	Yes	Yes	No	Yes	Yes	Yes	Yes	-6.43	0	0	0	0	0	0.55	0	1	1	3.67
ZINC000014957395	N[C@H](COc1cncc(C(=O)Nc2ccncc2)c1)Cc1c[nH]c2ccccc12	C22H21N5O2	387.43	29	21	0.14	8	5	3	111.4	105.92	2.43	1.8	2.97	0.76	3.27	2.25	-3.38	0.16	0.000413	Soluble	-3.64	0.0881	0.000227	Soluble	-7.75	6.97e-06	1.8e-08	Poorly soluble	High	No	Yes	No	Yes	Yes	Yes	Yes	-7.39	0	0	0	0	0	0.55	0	0	2	3.38
ZINC000014957417	N[C@H](COc1cncc(-c2nc(-c3ccncc3)cs2)c1)Cc1ccccc1	C22H20N4OS	388.49	28	23	0.14	7	5	1	111.88	102.16	3.5	3.19	4.22	1.47	5.21	3.52	-4.4	0.0153	3.94e-05	Moderately soluble	-5.01	0.00382	9.84e-06	Moderately soluble	-8.27	2.08e-06	5.36e-09	Poorly soluble	High	No	Yes	No	Yes	Yes	Yes	Yes	-6.4	0	0	0	0	0	0.55	0	0	1	3.83
ZINC000014957421	N[C@H](COc1cncc(-c2nc(-c3cccnc3)cs2)c1)Cc1ccccc1	C22H20N4OS	388.49	28	23	0.14	7	5	1	111.88	102.16	3.5	3.19	4.22	1.47	5.21	3.52	-4.4	0.0153	3.94e-05	Moderately soluble	-5.01	0.00382	9.84e-06	Moderately soluble	-8.27	2.08e-06	5.36e-09	Poorly soluble	High	No	Yes	No	Yes	Yes	Yes	Yes	-6.4	0	0	0	0	0	0.55	0	0	1	3.89
ZINC000014957425	N[C@H](COc1cncc(Nc2ccncc2)c1)Cc1c[nH]c2ccccc12	C21H21N5O	359.42	27	21	0.14	7	4	3	106.73	88.85	2.55	2.5	3.65	1.01	3.34	2.61	-3.76	0.0629	0.000175	Soluble	-4.01	0.035	9.74e-05	Moderately soluble	-7.82	5.47e-06	1.52e-08	Poorly soluble	High	No	Yes	No	Yes	Yes	Yes	Yes	-6.72	0	0	0	0	0	0.55	0	0	1	3.6
ZINC000014957429	N[C@H](COc1cncc(Nc2cccnc2)c1)Cc1c[nH]c2ccccc12	C21H21N5O	359.42	27	21	0.14	7	4	3	106.73	88.85	2.62	2.5	3.65	1.01	3.34	2.62	-3.76	0.0629	0.000175	Soluble	-4.01	0.035	9.74e-05	Moderately soluble	-7.82	5.47e-06	1.52e-08	Poorly soluble	High	No	Yes	No	Yes	Yes	Yes	Yes	-6.72	0	0	0	0	0	0.55	0	0	1	3.59
ZINC000014957437	N[C@H](COc1cncc(Nc2cccnc2)c1)Cc1ccccc1	C19H20N4O	320.39	24	18	0.16	7	4	2	94.88	73.06	2.82	2.38	3.17	1.25	2.8	2.48	-3.42	0.122	0.000381	Soluble	-3.56	0.0892	0.000278	Soluble	-6.96	3.55e-05	1.11e-07	Poorly soluble	High	Yes	Yes	No	Yes	No	Yes	Yes	-6.56	0	0	0	0	0	0.55	0	0	0	3.37
ZINC000014957445	N[C@H](COc1cncc(-c2ccncc2)c1)Cc1c[nH]c2ccccc12	C21H20N4O	344.41	26	21	0.14	6	4	2	102.63	76.82	2.67	2.59	3.57	1.29	4.12	2.85	-3.81	0.0535	0.000155	Soluble	-3.85	0.0484	0.000141	Soluble	-7.78	5.77e-06	1.67e-08	Poorly soluble	High	Yes	Yes	No	Yes	Yes	Yes	Yes	-6.56	0	0	0	0	0	0.55	0	0	0	3.36
ZINC000014957449	Cc1c(-c2cncc(OC[C@@H](N)Cc3c[nH]c4ccccc34)c2)cc(C#N)c(=O)n1C	C24H23N5O2	413.47	31	21	0.21	6	5	2	120.03	109.72	2.57	1.98	3.06	0.99	4.3	2.58	-3.76	0.0725	0.000175	Soluble	-3.91	0.0509	0.000123	Soluble	-7.67	8.94e-06	2.16e-08	Poorly soluble	High	No	Yes	No	No	Yes	No	Yes	-7.42	0	0	0	0	0	0.55	0	0	1	3.91
ZINC000014957453	N#Cc1ccc(-c2cncc(OC[C@@H](N)Cc3c[nH]c4ccccc34)c2)cc1	C23H20N4O	368.43	28	21	0.13	6	4	2	109.55	87.72	2.91	3.38	4.05	1.65	4.72	3.34	-4.41	0.0142	3.87e-05	Moderately soluble	-4.9	0.00463	1.26e-05	Moderately soluble	-8.22	2.23e-06	6.05e-09	Poorly soluble	High	No	Yes	Yes	Yes	Yes	Yes	Yes	-6.15	0	0	0	0	0	0.55	0	0	1	3.55
ZINC000014957457	N[C@H](COc1cncc(-c2ccc(F)cc2)c1)Cc1c[nH]c2ccccc12	C22H20FN3O	361.41	27	21	0.14	6	4	2	104.79	63.93	3.06	3.76	4.74	2.71	5.11	3.88	-4.63	0.00849	2.35e-05	Moderately soluble	-4.8	0.00579	1.6e-05	Moderately soluble	-8.42	1.39e-06	3.84e-09	Poorly soluble	High	Yes	Yes	Yes	Yes	Yes	Yes	Yes	-5.84	0	0	0	0	0	0.55	0	0	2	3.45
ZINC000014957464	Nc1ccc(-c2cncc(OC[C@@H](N)Cc3c[nH]c4ccccc34)c2)cc1	C22H22N4O	358.44	27	21	0.14	6	3	3	109.23	89.95	2.41	2.98	3.77	1.77	3.97	2.98	-4.12	0.0272	7.6e-05	Moderately soluble	-4.53	0.0105	2.93e-05	Moderately soluble	-7.78	5.95e-06	1.66e-08	Poorly soluble	High	No	Yes	No	Yes	No	Yes	Yes	-6.37	0	0	0	0	0	0.55	0	1	1	3.49
ZINC000014957472	NC(=O)c1ccc(-c2cncc(OC[C@@H](N)Cc3c[nH]c4ccccc34)c2)cc1	C23H22N4O2	386.45	29	21	0.13	7	4	3	112.92	107.02	2.41	2.53	3.28	1.51	3.9	2.73	-3.9	0.0482	0.000125	Soluble	-4.42	0.0146	3.77e-05	Moderately soluble	-7.71	7.59e-06	1.96e-08	Poorly soluble	High	No	Yes	No	Yes	Yes	Yes	Yes	-6.86	0	0	0	0	0	0.55	0	0	1	3.52
ZINC000014957497	NC(=O)Cc1cccc(-c2cncc(OC[C@@H](N)Cc3c[nH]c4ccccc34)c2)c1	C24H24N4O2	400.47	30	21	0.17	8	4	3	117.51	107.02	2.36	2.47	3.21	1.45	4.29	2.76	-3.87	0.0541	0.000135	Soluble	-4.36	0.0174	4.35e-05	Moderately soluble	-8.1	3.18e-06	7.94e-09	Poorly soluble	High	No	Yes	No	Yes	Yes	Yes	Yes	-6.99	0	0	0	0	0	0.55	0	0	2	3.77
ZINC000014957502	CC(=O)Nc1ccc(-c2cncc(OC[C@@H](N)Cc3c[nH]c4ccccc34)c2)cc1	C24H24N4O2	400.47	30	21	0.17	8	4	3	119.14	93.03	2.92	2.83	3.95	1.72	4.36	3.16	-4.1	0.0321	8.02e-05	Moderately soluble	-4.44	0.0145	3.62e-05	Moderately soluble	-8.49	1.28e-06	3.21e-09	Poorly soluble	High	No	Yes	Yes	Yes	Yes	Yes	Yes	-6.73	0	0	0	0	0	0.55	0	0	2	3.58
ZINC000014957523	N[C@H](COc1cncc(-c2ccc(NC(=O)Nc3ccccc3)nc2)c1)Cc1c[nH]c2ccccc12	C28H26N6O2	478.55	36	27	0.11	10	5	4	141.35	117.95	2.69	3.48	4.84	1.82	4.05	3.38	-4.89	0.0061	1.28e-05	Moderately soluble	-5.64	0.0011	2.29e-06	Moderately soluble	-10.23	2.84e-08	5.94e-11	Insoluble	Low	No	Yes	Yes	Yes	Yes	Yes	Yes	-6.75	0	1	0	0	0	0.55	0	0	2	4.14
ZINC000014957528	Nc1nccc(Nc2ccc(-c3cncc(OC[C@@H](N)Cc4c[nH]c5ccccc45)c3)cc2)n1	C26H25N7O	451.52	34	27	0.12	8	5	4	134.37	127.76	2.54	3.47	4.3	1.75	3.6	3.13	-4.89	0.00588	1.3e-05	Moderately soluble	-5.83	0.00066	1.46e-06	Moderately soluble	-9.52	1.35e-07	3e-10	Poorly soluble	Low	No	Yes	No	Yes	Yes	Yes	Yes	-6.59	0	1	0	0	0	0.55	0	0	2	4.07
ZINC000014957536	N[C@H](COc1cncc(-c2cccc(Nc3ncccn3)c2)c1)Cc1c[nH]c2ccccc12	C26H24N6O	436.51	33	27	0.12	8	5	3	129.96	101.74	3	3.81	4.71	1.87	4.32	3.54	-5.02	0.00413	9.46e-06	Moderately soluble	-5.64	0.000997	2.28e-06	Moderately soluble	-9.9	5.53e-08	1.27e-10	Poorly soluble	High	No	Yes	No	Yes	Yes	Yes	Yes	-6.26	0	0	0	0	0	0.55	0	0	3	3.85
ZINC000014957541	N[C@H](COc1cncc(-c2cccc(Nc3nccs3)c2)c1)Cc1c[nH]c2ccccc12	C25H23N5OS	441.55	32	26	0.12	8	4	3	130.05	117.09	3.26	4.56	5.38	2.09	5.52	4.16	-5.52	0.00132	2.99e-06	Moderately soluble	-6.74	8e-05	1.81e-07	Poorly soluble	-9.53	1.29e-07	2.93e-10	Poorly soluble	Low	No	Yes	No	Yes	Yes	Yes	Yes	-5.76	0	1	0	0	0	0.55	0	0	3	3.94
ZINC000014957545	Nc1ccc(-c2cncc(OC[C@@H](N)Cc3c[nH]c4ccccc34)c2)cc1C(=O)c1cccc(Cl)c1	C29H25ClN4O2	496.99	36	27	0.1	8	4	3	144.12	107.02	3.43	5.5	5.65	2.58	6.11	4.65	-6.41	0.000192	3.86e-07	Poorly soluble	-7.51	1.55e-05	3.12e-08	Poorly soluble	-10.73	9.21e-09	1.85e-11	Insoluble	Low	No	No	No	Yes	Yes	Yes	Yes	-5.43	0	3	0	0	1	0.55	1	1	3	4.16
ZINC000014957549	NC(=O)c1cccc2c(-c3cncc(OC[C@@H](N)Cc4c[nH]c5ccccc45)c3)cccc12	C27H24N4O2	436.51	33	25	0.11	7	4	3	130.43	107.02	2.44	3.78	4.43	2.16	4.93	3.55	-5.03	0.00411	9.41e-06	Moderately soluble	-5.72	0.00083	1.9e-06	Moderately soluble	-9.34	2e-07	4.59e-10	Poorly soluble	High	No	Yes	No	Yes	Yes	Yes	Yes	-6.28	0	1	0	0	0	0.55	0	0	2	3.75
ZINC000014957553	N[C@H](COc1cnc2ccc(-c3ccncc3)cc2c1)Cc1c[nH]c2ccccc12	C25H22N4O	394.47	30	25	0.12	6	4	2	120.13	76.82	3	3.93	4.73	2.23	5.14	3.81	-4.98	0.00411	1.04e-05	Moderately soluble	-5.24	0.00226	5.72e-06	Moderately soluble	-9.41	1.52e-07	3.85e-10	Poorly soluble	High	No	Yes	No	Yes	Yes	Yes	Yes	-5.92	0	0	0	0	0	0.55	0	0	2	3.41
ZINC000014957556	N[C@H](COc1cnc2ccc(-c3cccnc3)cc2c1)Cc1c[nH]c2ccccc12	C25H22N4O	394.47	30	25	0.12	6	4	2	120.13	76.82	3.16	3.93	4.73	2.23	5.14	3.84	-4.98	0.00411	1.04e-05	Moderately soluble	-5.24	0.00226	5.72e-06	Moderately soluble	-9.41	1.52e-07	3.85e-10	Poorly soluble	High	No	Yes	No	Yes	Yes	Yes	Yes	-5.92	0	0	0	0	0	0.55	0	0	2	3.48
ZINC000014957560	N[C@H](CNc1cncc(Oc2cccc3cnccc23)c1)Cc1c[nH]c2ccccc12	C25H23N5O	409.48	31	25	0.12	7	4	3	124.02	88.85	2.96	3.75	4.69	1.69	4.35	3.49	-4.88	0.00545	1.33e-05	Moderately soluble	-5.31	0.00201	4.92e-06	Moderately soluble	-9.45	1.44e-07	3.52e-10	Poorly soluble	High	No	Yes	No	Yes	Yes	Yes	Yes	-6.14	0	0	0	0	0	0.55	0	0	2	3.67
ZINC000014957564	N[C@H](CNc1cncc(Nc2cccc3cnccc23)c1)Cc1c[nH]c2ccccc12	C25H24N6	408.5	31	25	0.12	7	3	4	127.05	91.65	2.8	3.77	4.65	1.69	4.03	3.39	-4.88	0.00535	1.31e-05	Moderately soluble	-5.39	0.00167	4.09e-06	Moderately soluble	-9.77	7.02e-08	1.72e-10	Poorly soluble	High	No	Yes	No	Yes	No	Yes	Yes	-6.12	0	0	0	0	0	0.55	0	0	2	3.67
ZINC000014957568	N[C@H](COc1cncc2nc(-c3ccncc3)ccc12)Cc1c[nH]c2ccccc12	C24H21N5O	395.46	30	25	0.12	6	5	2	117.93	89.71	2.94	2.89	4.12	1.21	4.57	3.15	-4.33	0.0184	4.64e-05	Moderately soluble	-4.43	0.0146	3.68e-05	Moderately soluble	-9.04	3.6e-07	9.1e-10	Poorly soluble	High	No	Yes	No	Yes	Yes	Yes	Yes	-6.66	0	0	0	0	0	0.55	0	0	1	3.58
ZINC000014957572	N[C@@H](COc1cncc(-c2ccc3cnccc3c2)c1)Cc1c[nH]c2ccccc12	C25H22N4O	394.47	30	25	0.12	6	4	2	120.13	76.82	2.34	3.84	4.73	1.96	5.14	3.6	-4.93	0.00468	1.19e-05	Moderately soluble	-5.15	0.0028	7.09e-06	Moderately soluble	-9.41	1.52e-07	3.85e-10	Poorly soluble	High	No	Yes	No	Yes	Yes	Yes	Yes	-5.98	0	0	0	0	0	0.55	0	0	2	3.62
ZINC000014957577	NCCOc1cncc(/C=C/c2ccncc2)c1	C14H15N3O	241.29	18	12	0.14	5	4	1	71.41	61.03	2.07	1.08	1.77	0.48	2.47	1.57	-2.18	1.6	0.00661	Soluble	-1.95	2.69	0.0111	Very soluble	-4.46	0.00842	3.49e-05	Moderately soluble	High	Yes	No	Yes	No	No	No	No	-7.01	0	0	0	0	0	0.55	0	0	1	2.6
ZINC000014957600	N[C@H](COc1cncc(/C=C/c2ccncc2)c1)C(c1ccccc1)c1ccccc1	C27H25N3O	407.51	31	24	0.11	8	4	1	125.19	61.03	3.34	4.56	4.97	2.96	5.47	4.26	-5.28	0.00212	5.2e-06	Moderately soluble	-5.56	0.00111	2.72e-06	Moderately soluble	-9.09	3.3e-07	8.11e-10	Poorly soluble	High	Yes	Yes	Yes	No	Yes	Yes	Yes	-5.55	0	0	0	0	0	0.55	0	0	3	4.1
ZINC000014957604	N[C@@H](CCc1ccccc1)COc1cncc(/C=C/c2ccncc2)c1	C22H23N3O	345.44	26	18	0.18	8	4	1	105.51	61.03	3.33	3.46	3.77	2.14	4.57	3.45	-4.15	0.0247	7.15e-05	Moderately soluble	-4.42	0.013	3.77e-05	Moderately soluble	-7.38	1.43e-05	4.13e-08	Poorly soluble	High	Yes	Yes	No	Yes	Yes	Yes	Yes	-5.95	0	0	0	0	0	0.55	0	0	1	3.52
ZINC000014957608	N[C@@H](COCc1ccccc1)COc1cncc(/C=C/c2ccncc2)c1	C22H23N3O2	361.44	27	18	0.18	9	5	1	106.59	70.26	3.3	2.49	3.2	1.31	4.1	2.88	-3.55	0.102	0.000283	Soluble	-3.61	0.0886	0.000245	Soluble	-7.11	2.79e-05	7.71e-08	Poorly soluble	High	Yes	Yes	No	Yes	Yes	Yes	Yes	-6.74	0	0	0	0	0	0.55	0	0	2	3.69
ZINC000014957616	N[C@H](COc1cncc(/C=C/c2ccncc2)c1)Cc1cccc(O)c1	C21H21N3O2	347.41	26	18	0.14	7	5	2	102.73	81.26	2.67	2.75	3.08	1.36	3.69	2.71	-3.78	0.0581	0.000167	Soluble	-4.11	0.0269	7.74e-05	Moderately soluble	-6.4	0.000137	3.95e-07	Poorly soluble	High	No	Yes	No	Yes	Yes	Yes	Yes	-6.47	0	0	0	0	0	0.55	0	0	0	3.47
ZINC000014957620	N#Cc1cccc(C[C@H](N)COc2cncc(/C=C/c3ccncc3)c2)c1	C22H20N4O	356.42	27	18	0.14	7	5	1	105.42	84.82	2.92	2.82	3.25	1.24	4.21	2.89	-3.86	0.0495	0.000139	Soluble	-4.26	0.0196	5.51e-05	Moderately soluble	-7.06	3.12e-05	8.75e-08	Poorly soluble	High	No	Yes	No	Yes	Yes	Yes	Yes	-6.47	0	0	0	0	0	0.55	0	0	1	3.53
ZINC000014957624	N[C@H](COc1cncc(/C=C/c2ccncc2)c1)Cc1cccc2ccccc12	C25H23N3O	381.47	29	22	0.12	7	4	1	118.21	61.03	3.52	4.35	4.53	2.59	5.22	4.04	-5.04	0.00344	9.02e-06	Moderately soluble	-5.35	0.00172	4.5e-06	Moderately soluble	-8.63	8.98e-07	2.36e-09	Poorly soluble	High	Yes	Yes	Yes	Yes	Yes	Yes	Yes	-5.54	0	0	0	0	0	0.55	0	0	2	3.64
ZINC000014957628	N[C@H](COc1cncc(/C=C/c2ccncc2)c1)Cc1ccc2ccccc2c1	C25H23N3O	381.47	29	22	0.12	7	4	1	118.21	61.03	3.55	4.35	4.53	2.59	5.22	4.05	-5.04	0.00344	9.02e-06	Moderately soluble	-5.35	0.00172	4.5e-06	Moderately soluble	-8.63	8.98e-07	2.36e-09	Poorly soluble	High	Yes	Yes	Yes	Yes	Yes	Yes	Yes	-5.54	0	0	0	0	0	0.55	0	0	2	3.64
ZINC000014957632	N[C@H](COc1cncc(/C=C/c2ccncc2)c1)Cc1csc2ccccc12	C23H21N3OS	387.5	28	21	0.13	7	4	1	116.09	89.27	3.44	4.12	4.59	2.48	5.84	4.09	-4.93	0.00454	1.17e-05	Moderately soluble	-5.7	0.000771	1.99e-06	Moderately soluble	-7.89	4.96e-06	1.28e-08	Poorly soluble	High	No	Yes	Yes	Yes	Yes	Yes	Yes	-5.74	0	0	0	0	0	0.55	0	0	2	3.73
ZINC000014957636	N[C@@H](COc1cncc(/C=C/c2ccncc2)c1)Cc1c[nH]c2ccccc12	C23H22N4O	370.45	28	21	0.13	7	4	2	112.56	76.82	2.93	3.23	3.86	1.65	4.72	3.28	-4.26	0.0201	5.44e-05	Moderately soluble	-4.52	0.0113	3.05e-05	Moderately soluble	-7.85	5.26e-06	1.42e-08	Poorly soluble	High	Yes	Yes	No	Yes	Yes	Yes	Yes	-6.27	0	0	0	0	0	0.55	0	0	1	3.66
ZINC000014957638	N[C@H](COc1cnc(Cl)c(/C=C/c2ccncc2)c1)Cc1c[nH]c2ccccc12	C23H21ClN4O	404.89	29	21	0.13	7	4	2	117.57	76.82	2.88	4.19	4.51	2.13	5.36	3.81	-5.06	0.00349	8.63e-06	Moderately soluble	-5.51	0.00124	3.07e-06	Moderately soluble	-8.44	1.48e-06	3.66e-09	Poorly soluble	High	No	Yes	Yes	Yes	Yes	Yes	Yes	-5.79	0	0	0	0	0	0.55	0	1	2	3.81
ZINC000014957642	N[C@H](COc1cc(/C=C/c2ccncc2)cnc1Cl)Cc1c[nH]c2ccccc12	C23H21ClN4O	404.89	29	21	0.13	7	4	2	117.57	76.82	3.03	4.19	4.51	2.13	5.36	3.84	-5.06	0.00349	8.63e-06	Moderately soluble	-5.51	0.00124	3.07e-06	Moderately soluble	-8.44	1.48e-06	3.66e-09	Poorly soluble	High	No	Yes	Yes	Yes	Yes	Yes	Yes	-5.79	0	0	0	0	0	0.55	0	1	2	3.81
ZINC000014957647	Cn1cc(C[C@H](N)COc2cncc(/C=C/c3ccncc3)c2)c2ccccc21	C24H24N4O	384.47	29	21	0.17	7	4	1	117.46	65.96	3.25	3.18	3.87	1.86	4.2	3.27	-4.3	0.0192	5e-05	Moderately soluble	-4.24	0.0223	5.8e-05	Moderately soluble	-7.4	1.53e-05	3.99e-08	Poorly soluble	High	Yes	Yes	No	Yes	Yes	Yes	Yes	-6.39	0	0	0	0	0	0.55	0	0	1	3.79
ZINC000014957652	CN(C)[C@H](COc1cncc(/C=C/c2ccncc2)c1)Cc1c[nH]c2ccccc12	C25H26N4O	398.5	30	21	0.2	8	4	1	122.36	54.04	3.5	4.21	4.46	2.07	5.13	3.87	-4.95	0.00444	1.11e-05	Moderately soluble	-5.05	0.00351	8.82e-06	Moderately soluble	-8.29	2.02e-06	5.07e-09	Poorly soluble	High	Yes	Yes	Yes	Yes	Yes	Yes	Yes	-5.74	0	0	0	0	0	0.55	0	0	3	3.86
ZINC000014957669	N[C@H](CCc1cnc(Cl)c(/C=C/c2ccncc2)c1)Cc1c[nH]c2ccccc12	C24H23ClN4	402.92	29	21	0.17	7	3	2	120.85	67.59	3.14	4.84	5.07	2.9	6.21	4.43	-5.46	0.00139	3.46e-06	Moderately soluble	-5.99	0.000409	1.02e-06	Moderately soluble	-9.1	3.19e-07	7.93e-10	Poorly soluble	High	No	Yes	Yes	Yes	Yes	Yes	Yes	-5.32	0	0	0	0	0	0.55	0	1	2	3.76
ZINC000014957673	N[C@H](CNc1cnc(Cl)c(/C=C/c2ccncc2)c1)Cc1c[nH]c2ccccc12	C23H22ClN5	403.91	29	21	0.13	7	3	3	120.38	79.62	3.07	4.21	4.36	2.13	5.04	3.76	-5.07	0.00343	8.5e-06	Moderately soluble	-5.59	0.00103	2.56e-06	Moderately soluble	-8.75	7.22e-07	1.79e-09	Poorly soluble	High	No	Yes	Yes	Yes	Yes	Yes	Yes	-5.77	0	0	0	0	0	0.55	0	1	2	3.73
ZINC000014957677	N[C@H](CNc1cnc(Cl)c(/C=C/c2ccncc2)c1)C[C@@H]1CNc2ccccc21	C23H24ClN5	405.92	29	18	0.22	7	3	3	123.46	75.86	2.65	3.99	3.66	2.27	4.26	3.37	-4.87	0.0055	1.36e-05	Moderately soluble	-5.28	0.00211	5.19e-06	Moderately soluble	-8.23	2.38e-06	5.86e-09	Poorly soluble	High	Yes	Yes	Yes	Yes	Yes	Yes	Yes	-5.94	0	0	0	0	0	0.55	0	1	2	4.03
ZINC000014957681	N[C@H](CNc1cnc(Cl)c(/C=C/c2ccncc2)c1)C[C@H]1CNc2ccccc21	C23H24ClN5	405.92	29	18	0.22	7	3	3	123.46	75.86	3.09	3.99	3.66	2.27	4.26	3.45	-4.87	0.0055	1.36e-05	Moderately soluble	-5.28	0.00211	5.19e-06	Moderately soluble	-8.23	2.38e-06	5.86e-09	Poorly soluble	High	Yes	Yes	Yes	Yes	Yes	Yes	Yes	-5.94	0	0	0	0	0	0.55	0	1	2	4.03
ZINC000014957685	N[C@H](CNc1cncc(/C=C/c2ccncc2)c1)Cc1c[nH]c2ccccc12	C23H23N5	369.46	28	21	0.13	7	3	3	115.37	79.62	2.7	3.24	3.7	1.65	4.4	3.14	-4.26	0.0201	5.43e-05	Moderately soluble	-4.59	0.0096	2.6e-05	Moderately soluble	-8.16	2.56e-06	6.92e-09	Poorly soluble	High	No	Yes	No	Yes	Yes	Yes	Yes	-6.25	0	0	0	0	0	0.55	0	0	1	3.53
ZINC000014957689	N[C@@H](Cc1c[nH]c2ccccc12)C(=O)Nc1cncc(/C=C/c2ccncc2)c1	C23H21N5O	383.45	29	21	0.09	7	4	3	115.57	96.69	2.43	2.44	3.23	1.17	3.94	2.64	-3.83	0.0569	0.000148	Soluble	-4.11	0.0295	7.7e-05	Moderately soluble	-7.69	7.78e-06	2.03e-08	Poorly soluble	High	No	Yes	No	Yes	Yes	Yes	Yes	-6.91	0	0	0	0	0	0.55	0	0	1	3.48
ZINC000014957698	N[C@@H](Cc1ccccc1)C(=O)Nc1cncc(/C=C/c2ccncc2)c1	C21H20N4O	344.41	26	18	0.1	7	4	2	103.72	80.9	2.59	2.31	2.75	1.42	3.39	2.49	-3.48	0.114	0.00033	Soluble	-3.65	0.0776	0.000225	Soluble	-6.83	5.04e-05	1.46e-07	Poorly soluble	High	No	Yes	No	Yes	Yes	Yes	Yes	-6.76	0	0	0	0	0	0.55	0	0	0	3.2
ZINC000014957702	N[C@@H](Cc1cccc2ccccc12)C(=O)Nc1cncc(/C=C/c2ccncc2)c1	C25H22N4O	394.47	30	22	0.08	7	4	2	121.22	80.9	2.92	3.56	3.9	2.1	4.44	3.38	-4.61	0.0097	2.46e-05	Moderately soluble	-4.94	0.00448	1.14e-05	Moderately soluble	-8.47	1.33e-06	3.37e-09	Poorly soluble	High	No	Yes	No	Yes	Yes	Yes	Yes	-6.18	0	0	0	0	0	0.55	0	0	2	3.43
ZINC000014957711	NC[C@@H](c1ccccc1)c1cncc(/C=C/c2ccncc2)c1	C20H19N3	301.38	23	18	0.1	5	3	1	94.37	51.8	2.6	2.82	3.52	2.28	4.26	3.1	-3.73	0.0556	0.000184	Soluble	-3.57	0.082	0.000272	Soluble	-6.86	4.17e-05	1.38e-07	Poorly soluble	High	Yes	Yes	No	Yes	No	Yes	Yes	-6.14	0	0	0	0	0	0.55	0	0	0	3.22
ZINC000014957719	NC[C@H](c1ccccc1)c1cncc(/C=C/c2ccncc2)c1	C20H19N3	301.38	23	18	0.1	5	3	1	94.37	51.8	2.71	2.82	3.52	2.28	4.26	3.12	-3.73	0.0556	0.000184	Soluble	-3.57	0.082	0.000272	Soluble	-6.86	4.17e-05	1.38e-07	Poorly soluble	High	Yes	Yes	No	Yes	No	Yes	Yes	-6.14	0	0	0	0	0	0.55	0	0	0	3.22
ZINC000014957723	Cn1cc([C@@H](CN)c2cncc(/C=C/c3ccncc3)c2)c2ccccc21	C23H22N4	354.45	27	21	0.13	5	3	1	111.13	56.73	2.95	2.9	4.01	2.21	4.27	3.27	-4.11	0.0275	7.76e-05	Moderately soluble	-3.75	0.0628	0.000177	Soluble	-7.28	1.88e-05	5.3e-08	Poorly soluble	High	Yes	Yes	Yes	Yes	Yes	Yes	Yes	-6.4	0	0	0	0	0	0.55	0	0	1	3.53
ZINC000014957727	Cn1cc([C@H](CN)c2cncc(/C=C/c3ccncc3)c2)c2ccccc21	C23H22N4	354.45	27	21	0.13	5	3	1	111.13	56.73	2.89	2.9	4.01	2.21	4.27	3.26	-4.11	0.0275	7.76e-05	Moderately soluble	-3.75	0.0628	0.000177	Soluble	-7.28	1.88e-05	5.3e-08	Poorly soluble	High	Yes	Yes	Yes	Yes	Yes	Yes	Yes	-6.4	0	0	0	0	0	0.55	0	0	1	3.53
ZINC000014957755	COc1cc(/C=C/c2cncc(OC[C@@H](N)Cc3c[nH]c4ccccc34)c2)ccn1	C24H24N4O2	400.47	30	21	0.17	8	5	2	119.05	86.05	3.6	3.54	3.87	1.72	4.78	3.5	-4.54	0.0115	2.86e-05	Moderately soluble	-5.03	0.00372	9.3e-06	Moderately soluble	-7.95	4.48e-06	1.12e-08	Poorly soluble	High	No	Yes	No	Yes	Yes	Yes	Yes	-6.23	0	0	0	0	0	0.55	0	0	3	3.87
ZINC000014957760	N[C@H](COc1cncc(/C=C/c2ccnc(Oc3ccccc3)c2)c1)Cc1c[nH]c2ccccc12	C29H26N4O2	462.54	35	27	0.1	9	5	2	139.08	86.05	4	5.09	5.65	2.79	5.83	4.67	-5.89	0.000594	1.28e-06	Moderately soluble	-6.64	0.000106	2.29e-07	Poorly soluble	-10.02	4.41e-08	9.53e-11	Insoluble	High	No	Yes	No	Yes	Yes	Yes	Yes	-5.51	0	2	0	0	1	0.55	0	0	3	4.26
ZINC000014957764	N[C@H](COc1cncc(/C=C/c2ccnc(Sc3ccccc3)c2)c1)Cc1c[nH]c2ccccc12	C29H26N4OS	478.61	35	27	0.1	9	4	2	143.12	102.12	4.14	5.63	6.01	3.2	6.39	5.07	-6.33	0.000223	4.67e-07	Poorly soluble	-7.54	1.39e-05	2.9e-08	Poorly soluble	-10.37	2.02e-08	4.23e-11	Insoluble	Low	No	Yes	No	Yes	Yes	Yes	Yes	-5.22	0	2	0	1	1	0.55	0	0	3	4.23
ZINC000014957768	N[C@H](COc1cncc(/C=C/c2ccnc(SCc3ccccc3)c2)c1)Cc1c[nH]c2ccccc12	C30H28N4OS	492.63	36	27	0.13	10	4	2	148.77	102.12	4.09	5.57	6	3.12	6.79	5.11	-6.3	0.000248	5.03e-07	Poorly soluble	-7.48	1.65e-05	3.34e-08	Poorly soluble	-10.76	8.48e-09	1.72e-11	Insoluble	Low	No	Yes	Yes	No	Yes	Yes	Yes	-5.35	0	3	0	1	1	0.55	0	0	3	4.46
ZINC000014957772	Nc1cc(/C=C/c2cncc(OC[C@@H](N)Cc3c[nH]c4ccccc34)c2)ccn1	C23H23N5O	385.46	29	21	0.13	7	4	3	116.96	102.84	2.8	2.88	3.45	1.51	4	2.93	-4.12	0.0294	7.62e-05	Moderately soluble	-4.7	0.0077	2e-05	Moderately soluble	-7.48	1.29e-05	3.33e-08	Poorly soluble	High	No	Yes	No	Yes	Yes	Yes	Yes	-6.61	0	0	0	0	0	0.55	0	0	1	3.76
ZINC000014957776	CNc1cc(/C=C/c2cncc(OC[C@@H](N)Cc3c[nH]c4ccccc34)c2)ccn1	C24H25N5O	399.49	30	21	0.17	8	4	3	121.86	88.85	3.17	3.55	3.71	1.72	4.46	3.32	-4.54	0.0114	2.86e-05	Moderately soluble	-5.1	0.00317	7.93e-06	Moderately soluble	-8.26	2.18e-06	5.46e-09	Poorly soluble	High	No	Yes	No	Yes	Yes	Yes	Yes	-6.22	0	0	0	0	0	0.55	0	0	3	3.85
ZINC000014957780	CCNc1cc(/C=C/c2cncc(OC[C@@H](N)Cc3c[nH]c4ccccc34)c2)ccn1	C25H27N5O	413.51	31	21	0.2	9	4	3	126.67	88.85	3.55	3.92	4.1	1.93	4.86	3.67	-4.78	0.00685	1.66e-05	Moderately soluble	-5.48	0.00135	3.27e-06	Moderately soluble	-8.66	9.13e-07	2.21e-09	Poorly soluble	High	No	Yes	Yes	Yes	Yes	Yes	Yes	-6.04	0	0	0	0	0	0.55	0	0	3	3.96
ZINC000014957783	N[C@H](COc1cncc(/C=C/c2ccnc(NC3CC3)c2)c1)Cc1c[nH]c2ccccc12	C26H27N5O	425.53	32	21	0.23	9	4	3	129.36	88.85	3.51	4.1	4.18	2.13	4.9	3.76	-4.95	0.00474	1.11e-05	Moderately soluble	-5.67	0.000906	2.13e-06	Moderately soluble	-8.45	1.5e-06	3.53e-09	Poorly soluble	High	No	Yes	No	Yes	Yes	Yes	Yes	-5.98	0	0	0	0	0	0.55	0	0	3	4
ZINC000014957787	N[C@H](COc1cncc(/C=C/c2ccnc(NCc3ccccc3)c2)c1)Cc1c[nH]c2ccccc12	C30H29N5O	475.58	36	27	0.13	10	4	3	146.35	88.85	4.03	5.04	5.13	2.71	5.91	4.57	-5.86	0.000658	1.38e-06	Moderately soluble	-6.65	0.000107	2.25e-07	Poorly soluble	-10.72	8.98e-09	1.89e-11	Insoluble	High	No	Yes	No	Yes	Yes	Yes	Yes	-5.62	0	1	0	0	1	0.55	0	0	3	4.22
ZINC000014957791	N[C@H](COc1cncc(/C=C/c2ccnc(-n3ccc4ccccc43)c2)c1)Cc1c[nH]c2ccccc12	C31H27N5O	485.58	37	30	0.1	8	4	2	149.39	81.75	3.86	5.3	5.8	3.04	5.77	4.75	-6.26	0.000266	5.48e-07	Poorly soluble	-6.77	8.29e-05	1.71e-07	Poorly soluble	-10.32	2.34e-08	4.82e-11	Insoluble	High	No	No	No	No	Yes	No	Yes	-5.5	0	3	0	0	1	0.55	0	0	3	4.29
ZINC000014957795	Cn1cc(C[C@H](N)COc2cncc(-c3ccc4cnccc4c3)c2)c2ccccc21	C26H24N4O	408.49	31	25	0.15	6	4	1	125.03	65.96	3.5	3.79	4.74	2.17	4.62	3.76	-4.96	0.00447	1.09e-05	Moderately soluble	-4.87	0.00552	1.35e-05	Moderately soluble	-8.96	4.44e-07	1.09e-09	Poorly soluble	High	Yes	Yes	Yes	Yes	Yes	Yes	Yes	-6.1	0	0	0	0	0	0.55	0	0	2	3.76
ZINC000014957799	N[C@H](COc1cncc(-c2ccc3cnccc3c2)c1)Cc1n[nH]c2ccccc12	C24H21N5O	395.46	30	25	0.12	6	5	2	117.93	89.71	2.67	3.38	4.12	1.75	4.57	3.3	-4.64	0.00902	2.28e-05	Moderately soluble	-4.94	0.00451	1.14e-05	Moderately soluble	-9.04	3.6e-07	9.1e-10	Poorly soluble	High	No	Yes	No	Yes	Yes	Yes	Yes	-6.31	0	0	0	0	0	0.55	0	0	1	3.7
ZINC000014957803	N[C@H](COc1cncc(-c2ccc3cnccc3c2)c1)Cc1csc2ccccc12	C25H21N3OS	411.52	30	25	0.12	6	4	1	123.66	89.27	3.4	4.73	5.46	2.79	6.26	4.53	-5.59	0.00105	2.56e-06	Moderately soluble	-6.33	0.000191	4.63e-07	Poorly soluble	-9.46	1.43e-07	3.48e-10	Poorly soluble	High	No	Yes	Yes	No	Yes	Yes	Yes	-5.45	0	0	0	0	0	0.55	0	0	2	3.71
ZINC000014957807	N[C@H](COc1cncc(-c2ccc3cnccc3c2)c1)Cc1ccc2ccccc2c1	C27H23N3O	405.49	31	26	0.11	6	4	1	125.78	61.03	3.59	4.96	5.4	2.9	5.63	4.5	-5.7	0.000803	1.98e-06	Moderately soluble	-5.98	0.000425	1.05e-06	Moderately soluble	-10.19	2.59e-08	6.4e-11	Insoluble	High	Yes	Yes	Yes	No	Yes	Yes	Yes	-5.25	0	0	0	0	0	0.55	0	0	2	3.59
ZINC000014957811	N[C@H](COc1cncc(-c2ccc3cnccc3c2)c1)Cc1cnc2ccccc2c1	C26H22N4O	406.48	31	26	0.12	6	5	1	123.58	73.92	3.35	3.98	4.79	2.13	5.06	3.86	-5.09	0.00329	8.09e-06	Moderately soluble	-5.23	0.00237	5.84e-06	Moderately soluble	-9.82	6.14e-08	1.51e-10	Poorly soluble	High	No	Yes	Yes	No	Yes	Yes	Yes	-5.95	0	0	0	0	0	0.55	0	0	2	3.64
ZINC000014957816	N[C@H](COc1cncc(-c2ccc3cnccc3c2)c1)Cc1ccccc1	C23H21N3O	355.43	27	22	0.13	6	4	1	108.27	61.03	3.27	3.71	4.25	2.25	4.62	3.62	-4.59	0.00918	2.58e-05	Moderately soluble	-4.68	0.00738	2.08e-05	Moderately soluble	-8.56	9.83e-07	2.77e-09	Poorly soluble	High	Yes	Yes	Yes	Yes	Yes	Yes	Yes	-5.83	0	0	0	0	0	0.55	0	0	2	3.36
ZINC000014957820	N[C@H](COc1cncc(-c2ccc3cnccc3c2)c1)Cc1ccncc1	C22H20N4O	356.42	27	22	0.14	6	5	1	106.07	73.92	2.85	2.64	3.64	1.2	4.05	2.88	-3.92	0.0429	0.00012	Soluble	-3.84	0.0512	0.000144	Soluble	-8.19	2.33e-06	6.53e-09	Poorly soluble	High	Yes	Yes	No	Yes	Yes	Yes	Yes	-6.6	0	0	0	0	0	0.55	0	0	1	3.37
ZINC000014957823	N[C@H](COc1cncc(-c2ccc3cnccc3c2)c1)CC1CCCCC1	C23H27N3O	361.48	27	16	0.39	6	4	1	110.52	61.03	3.56	4.85	4.97	2.47	4.72	4.11	-5.18	0.00239	6.62e-06	Moderately soluble	-5.87	0.000493	1.36e-06	Moderately soluble	-7.47	1.22e-05	3.37e-08	Poorly soluble	High	Yes	Yes	Yes	No	No	Yes	Yes	-5.06	0	0	0	0	0	0.55	0	0	2	3.65
ZINC000014957827	N[C@H](COc1cncc(-c2ccc3cnccc3c2)c1)c1ccccc1	C22H19N3O	341.41	26	22	0.09	5	4	1	103.47	61.03	2.94	3.22	4.05	2.03	4.23	3.3	-4.28	0.0179	5.23e-05	Moderately soluble	-4.17	0.0229	6.7e-05	Moderately soluble	-8.16	2.35e-06	6.87e-09	Poorly soluble	High	Yes	Yes	No	Yes	Yes	Yes	Yes	-6.1	0	0	0	0	0	0.55	0	0	0	3.33
ZINC000014957835	Cc1[nH]c2ccccc2c1C[C@H](N)COc1cncc(-c2ccc3[nH]nc(C)c3c2)c1	C25H25N5O	411.5	31	24	0.2	6	4	3	124.41	92.61	2.55	4.09	4.67	2.26	5.7	3.85	-5.14	0.00295	7.16e-06	Moderately soluble	-5.74	0.000748	1.82e-06	Moderately soluble	-9.38	1.7e-07	4.13e-10	Poorly soluble	High	No	Yes	No	Yes	Yes	Yes	Yes	-5.91	0	0	0	0	0	0.55	1	0	2	3.8
ZINC000014957839	Cc1n[nH]c2ccc(-c3cncc(OC[C@@H](N)Cc4csc5ccccc45)c3)cc12	C24H22N4OS	414.52	30	24	0.17	6	4	2	122.97	105.06	2.97	4.58	5.1	2.87	6.29	4.36	-5.49	0.00134	3.23e-06	Moderately soluble	-6.51	0.000128	3.09e-07	Poorly soluble	-9.05	3.67e-07	8.85e-10	Poorly soluble	High	No	Yes	No	Yes	Yes	Yes	Yes	-5.58	0	0	0	0	0	0.55	0	0	2	3.76
ZINC000014957844	Cc1n[nH]c2ccc(-c3cncc(OC[C@@H](N)Cc4ccc5ccccc5c4)c3)cc12	C26H24N4O	408.49	31	25	0.15	6	4	2	125.1	76.82	3.1	4.81	5.04	2.98	5.66	4.32	-5.6	0.00102	2.49e-06	Moderately soluble	-6.16	0.000285	6.99e-07	Poorly soluble	-9.79	6.64e-08	1.63e-10	Poorly soluble	High	No	Yes	No	No	Yes	Yes	Yes	-5.38	0	0	0	0	0	0.55	0	0	2	3.67
ZINC000014957850	Cc1n[nH]c2ccc(-c3cncc(OC[C@@H](N)Cc4cccc5ccccc45)c3)cc12	C26H24N4O	408.49	31	25	0.15	6	4	2	125.1	76.82	2.98	4.81	5.04	2.98	5.66	4.29	-5.6	0.00102	2.49e-06	Moderately soluble	-6.16	0.000285	6.99e-07	Poorly soluble	-9.79	6.64e-08	1.63e-10	Poorly soluble	High	No	Yes	No	No	Yes	Yes	Yes	-5.38	0	0	0	0	0	0.55	0	0	2	3.67
ZINC000014957854	COc1ccc2ccccc2c1C[C@H](N)COc1cncc(-c2ccc3[nH]nc(C)c3c2)c1	C27H26N4O2	438.52	33	25	0.19	7	5	2	131.59	86.05	3.16	4.78	5.04	2.64	5.73	4.27	-5.67	0.00094	2.14e-06	Moderately soluble	-6.32	0.000211	4.8e-07	Poorly soluble	-9.89	5.66e-08	1.29e-10	Poorly soluble	High	No	Yes	No	Yes	Yes	Yes	Yes	-5.58	0	1	0	0	0	0.55	0	0	2	3.87
ZINC000014957858	Cc1n[nH]c2ccc(-c3cncc(OC[C@@H](N)Cc4cnc5ccccc5c4)c3)cc12	C25H23N5O	409.48	31	25	0.16	6	5	2	122.89	89.71	2.83	3.83	4.43	2.23	5.09	3.68	-4.99	0.00417	1.02e-05	Moderately soluble	-5.41	0.00159	3.89e-06	Moderately soluble	-9.42	1.57e-07	3.84e-10	Poorly soluble	High	No	Yes	No	Yes	Yes	Yes	Yes	-6.08	0	0	0	0	0	0.55	0	0	2	3.69
ZINC000014957868	Cc1n[nH]c2ccc(-c3cncc(OC[C@@H](N)Cc4ccncc4)c3)cc12	C21H21N5O	359.42	27	21	0.19	6	5	2	105.39	89.71	2.4	2.49	3.28	1.29	4.07	2.7	-3.82	0.0548	0.000153	Soluble	-4.02	0.0344	9.57e-05	Moderately soluble	-7.78	5.95e-06	1.66e-08	Poorly soluble	High	No	Yes	No	Yes	Yes	Yes	Yes	-6.72	0	0	0	0	0	0.55	0	0	1	3.45
ZINC000014957872	Cc1n[nH]c2ccc(-c3cncc(OC[C@@H](N)CC4CCCCC4)c3)cc12	C22H28N4O	364.48	27	15	0.45	6	4	2	109.83	76.82	3.09	4.7	4.61	2.54	4.74	3.94	-5.08	0.00306	8.4e-06	Moderately soluble	-6.04	0.000331	9.09e-07	Poorly soluble	-7.07	3.11e-05	8.53e-08	Poorly soluble	High	No	Yes	Yes	Yes	Yes	Yes	Yes	-5.19	0	0	0	0	0	0.55	0	0	2	3.72
ZINC000014957874	Cc1n[nH]c2ccc(-c3cncc(OC[C@@H](N)c4ccccc4)c3)cc12	C21H20N4O	344.41	26	21	0.14	5	4	2	102.78	76.82	2.5	3.07	3.69	2.1	4.25	3.12	-4.18	0.0229	6.65e-05	Moderately soluble	-4.35	0.0154	4.47e-05	Moderately soluble	-7.76	6e-06	1.74e-08	Poorly soluble	High	Yes	Yes	No	Yes	Yes	Yes	Yes	-6.22	0	0	0	0	0	0.55	0	0	0	3.38
ZINC000014957878	Cc1n[nH]c2ccc(-c3cncc(OCC[C@@H](N)Cc4ccccc4)c3)cc12	C23H24N4O	372.46	28	21	0.22	7	4	2	112.4	76.82	2.35	3.92	4.27	2.53	5.03	3.62	-4.71	0.00723	1.94e-05	Moderately soluble	-5.23	0.00218	5.86e-06	Moderately soluble	-8.55	1.05e-06	2.83e-09	Poorly soluble	High	No	Yes	No	Yes	Yes	Yes	Yes	-5.79	0	0	0	0	0	0.55	0	0	2	3.52
ZINC000014957884	Cc1n[nH]c2ccc(-c3cncc(OCCC[C@@H](N)Cc4ccccc4)c3)cc12	C24H26N4O	386.49	29	21	0.25	8	4	2	117.21	76.82	3.12	4.28	4.66	2.74	5.42	4.05	-4.94	0.00443	1.15e-05	Moderately soluble	-5.61	0.000958	2.48e-06	Moderately soluble	-8.94	4.42e-07	1.14e-09	Poorly soluble	High	No	Yes	No	Yes	Yes	Yes	Yes	-5.62	0	0	0	0	0	0.55	0	0	3	3.65
ZINC000014957888	Cc1n[nH]c2ccc(-c3cncc(OC[C@@H](N)CCCc4ccccc4)c3)cc12	C24H26N4O	386.49	29	21	0.25	8	4	2	117.21	76.82	3.13	4.28	4.66	2.74	5.42	4.05	-4.94	0.00443	1.15e-05	Moderately soluble	-5.61	0.000958	2.48e-06	Moderately soluble	-8.94	4.42e-07	1.14e-09	Poorly soluble	High	No	Yes	No	Yes	Yes	Yes	Yes	-5.62	0	0	0	0	0	0.55	0	0	3	3.69
ZINC000014957892	Cc1n[nH]c2ccc(-c3cncc(NC[C@@H](N)Cc4ccccc4)c3)cc12	C22H23N5	357.45	27	21	0.18	6	3	3	110.4	79.62	2.3	3.58	3.72	2.32	4.32	3.25	-4.49	0.0115	3.23e-05	Moderately soluble	-4.94	0.00412	1.15e-05	Moderately soluble	-8.47	1.22e-06	3.42e-09	Poorly soluble	High	No	Yes	No	Yes	No	Yes	Yes	-5.94	0	0	0	0	0	0.55	0	0	2	3.3
ZINC000014957896	Cc1n[nH]c2ccc(-c3cncc(SC[C@@H](N)Cc4c[nH]c5ccccc45)c3)cc12	C24H23N5S	413.54	30	24	0.17	6	3	3	124.68	108.68	2.52	4.23	5.08	2.87	5.73	4.08	-5.26	0.00225	5.43e-06	Moderately soluble	-6.22	0.000247	5.98e-07	Poorly soluble	-9.37	1.78e-07	4.32e-10	Poorly soluble	High	No	Yes	No	Yes	Yes	Yes	Yes	-5.82	0	0	0	0	0	0.55	0	0	2	3.92
ZINC000014957904	CC(C)(N)c1ccc(-c2nc3ccccc3nc2-c2ccccc2)cc1	C23H21N3	339.43	26	22	0.13	3	3	1	107.58	51.8	3.61	4.32	5.05	3.36	5.07	4.28	-5.09	0.00273	8.05e-06	Moderately soluble	-5.12	0.00256	7.55e-06	Moderately soluble	-8.79	5.47e-07	1.61e-09	Poorly soluble	High	Yes	Yes	Yes	Yes	No	Yes	Yes	-5.3	0	0	0	0	0	0.55	0	0	1	2.81
ZINC000014957908	O=c1cnc(-c2ccccc2)c(-c2ccc(CN3CCC(n4c(=O)[nH]c5ccccc54)CC3)cc2)[nH]1	C29H27N5O2	477.56	36	27	0.21	5	4	2	146.33	86.78	3.27	3.47	4.05	3.01	5.14	3.79	-5.21	0.00293	6.14e-06	Moderately soluble	-4.97	0.00507	1.06e-05	Moderately soluble	-9.45	1.69e-07	3.54e-10	Poorly soluble	High	No	Yes	No	Yes	Yes	No	Yes	-6.75	0	1	0	0	0	0.55	0	0	1	4.02
ZINC000014957942	O=c1[nH]c2ccccc2n1C1CCN(Cc2ccc(-c3nc4ccc(-c5nnn[nH]5)cc4nc3-c3ccccc3)cc2)CC1	C34H29N9O	579.65	44	36	0.18	6	7	2	174.18	121.27	3.67	4.73	5.09	4.19	5.27	4.59	-6.62	0.000138	2.38e-07	Poorly soluble	-7.01	5.71e-05	9.86e-08	Poorly soluble	-11.71	1.14e-09	1.96e-12	Insoluble	Low	No	No	Yes	No	Yes	No	No	-6.48	2	3	0	0	1	0.17	0	0	2	4.45
ZINC000014957947	O=c1[nH]c2ccccc2n1C1CCN(Cc2ccc(-c3nc4cc(-c5nnn[nH]5)ccc4nc3-c3ccccc3)cc2)CC1	C34H29N9O	579.65	44	36	0.18	6	7	2	174.18	121.27	3.71	4.73	5.09	4.19	5.27	4.6	-6.62	0.000138	2.38e-07	Poorly soluble	-7.01	5.71e-05	9.86e-08	Poorly soluble	-11.71	1.14e-09	1.96e-12	Insoluble	Low	No	No	Yes	No	Yes	No	No	-6.48	2	3	0	0	1	0.17	0	0	2	4.45
ZINC000014957951	Cn1nnc(-c2ccc3nc(-c4ccc(CN5CCC(n6c(=O)[nH]c7ccccc76)CC5)cc4)c(-c4ccccc4)nc3c2)n1	C35H31N9O	593.68	45	36	0.2	6	7	1	179.08	110.41	4.77	5.3	5.1	3.56	4.76	4.7	-7.06	5.22e-05	8.79e-08	Poorly soluble	-7.37	2.53e-05	4.27e-08	Poorly soluble	-11.25	3.33e-09	5.61e-12	Insoluble	High	No	No	No	No	Yes	No	No	-6.16	1	3	0	0	2	0.55	0	0	2	4.67
ZINC000014957955	O=c1[nH]c2ccccc2n1C1CCN(Cc2ccc(-c3nc4cc5cn[nH]c5cc4nc3-c3ccccc3)cc2)CC1	C34H29N7O	551.64	42	34	0.18	5	5	2	170.66	95.49	4.29	5.07	5.79	3.74	5.91	4.96	-6.72	0.000104	1.89e-07	Poorly soluble	-6.82	8.4e-05	1.52e-07	Poorly soluble	-11.65	1.24e-09	2.25e-12	Insoluble	High	No	No	Yes	No	No	No	No	-6.07	1	4	0	0	2	0.55	0	0	2	4.24
ZINC000014957958	O=c1[nH]c2ccccc2n1C1CCN(Cc2ccc(-c3nc4ccccc4cc3-c3ccccc3)cc2)CC1	C34H30N4O	510.63	39	31	0.18	5	3	1	163.21	53.92	4.16	6.39	6.52	4.92	6.57	5.71	-7.29	2.62e-05	5.13e-08	Poorly soluble	-7.31	2.48e-05	4.85e-08	Poorly soluble	-11.55	1.42e-09	2.79e-12	Insoluble	High	No	No	Yes	No	No	No	No	-4.88	2	3	0	1	1	0.17	0	0	2	4.11
ZINC000014957962	N#Cc1cnc(-c2ccc(CN3CCC(n4c(=O)[nH]c5ccccc54)CC3)cc2)c(-c2ccccc2)c1	C31H27N5O	485.58	37	27	0.19	5	4	1	150.42	77.71	3.94	4.77	5.23	3.38	5.61	4.59	-6.07	0.000417	8.6e-07	Poorly soluble	-6.13	0.000358	7.36e-07	Poorly soluble	-9.99	4.92e-08	1.01e-10	Poorly soluble	High	No	Yes	No	No	Yes	No	Yes	-5.88	0	2	0	0	0	0.55	0	0	2	4.03
ZINC000014957966	N#Cc1cnc(-c2ccc(CNCc3ccc(-c4csnn4)cc3)cc2)c(-c2ccccc2)c1	C28H21N5S	459.56	34	29	0.07	7	5	1	135.79	102.73	3.87	4.9	5.79	2.71	7.11	4.88	-5.95	0.000521	1.13e-06	Moderately soluble	-6.79	7.4e-05	1.61e-07	Poorly soluble	-11.43	1.71e-09	3.72e-12	Insoluble	Low	No	Yes	No	No	Yes	Yes	Yes	-5.62	0	2	0	0	0	0.55	0	0	2	3.63
ZINC000014957970	N#Cc1cnc(-c2ccc(CN3CCC(c4nc5ccc(F)cc5[nH]4)CC3)cc2)c(-c2ccccc2)c1	C31H26FN5	487.57	37	27	0.19	5	5	1	147.62	68.6	3.82	5.63	6.57	3.81	6.93	5.35	-6.62	0.000117	2.4e-07	Poorly soluble	-6.83	7.14e-05	1.47e-07	Poorly soluble	-11.19	3.16e-09	6.47e-12	Insoluble	High	No	No	Yes	No	Yes	No	Yes	-5.28	0	3	0	1	1	0.55	0	0	2	4.12
ZINC000014957974	Cc1ccc2nc(C3CCN(Cc4ccc(-c5ncc(C#N)cc5-c5ccccc5)cc4)CC3)[nH]c2c1	C32H29N5	483.61	37	27	0.22	5	4	1	152.63	68.6	3.94	5.9	6.32	3.64	7.05	5.37	-6.77	8.3e-05	1.72e-07	Poorly soluble	-7.11	3.72e-05	7.69e-08	Poorly soluble	-11.3	2.42e-09	5e-12	Insoluble	High	No	No	Yes	No	No	No	Yes	-5.06	0	3	0	1	1	0.55	0	0	2	4.1
ZINC000014957978	N#Cc1cnc(-c2ccc(CN3CCC(c4nc5ccccc5[nH]4)CC3)cc2)c(-c2ccccc2)c1	C31H27N5	469.58	36	27	0.19	5	4	1	147.66	68.6	3.75	5.53	6.01	3.45	6.52	5.05	-6.46	0.000163	3.47e-07	Poorly soluble	-6.73	8.74e-05	1.86e-07	Poorly soluble	-10.93	5.53e-09	1.18e-11	Insoluble	High	No	No	Yes	No	Yes	Yes	Yes	-5.24	0	2	0	1	1	0.55	0	0	2	3.97
ZINC000014957982	N#Cc1cnc(-c2ccc(CN3CCC(n4cnc5ccccc54)CC3)cc2)c(-c2ccccc2)c1	C31H27N5	469.58	36	27	0.19	5	4	0	147.6	57.74	3.99	5.36	5.94	3.45	5.47	4.84	-6.35	0.000208	4.43e-07	Poorly soluble	-6.33	0.000222	4.72e-07	Poorly soluble	-10.1	3.7e-08	7.89e-11	Insoluble	High	No	Yes	Yes	No	Yes	No	Yes	-5.36	0	2	0	1	1	0.55	0	0	2	3.93
ZINC000014957986	Cc1nc2ccccc2n1C1CCN(Cc2ccc(-c3ncc(C#N)cc3-c3ccccc3)cc2)CC1	C32H29N5	483.61	37	27	0.22	5	4	0	152.56	57.74	4.16	5.76	6.25	3.64	6	5.16	-6.68	0.000102	2.1e-07	Poorly soluble	-6.74	8.78e-05	1.82e-07	Poorly soluble	-10.48	1.62e-08	3.34e-11	Insoluble	High	No	No	Yes	No	Yes	Yes	Yes	-5.16	0	3	0	1	1	0.55	0	0	2	4.09
ZINC000014957988	O=c1[nH]c2ccccc2n1C1CCN(Cc2ccc(-c3ncc(-c4nnn[nH]4)cc3-c3ccccc3)cc2)CC1	C31H28N8O	528.61	40	32	0.19	6	6	2	158.88	108.38	3.04	4.34	4.54	4.03	4.87	4.16	-6.05	0.000474	8.96e-07	Poorly soluble	-6.33	0.000247	4.67e-07	Poorly soluble	-10.47	1.8e-08	3.4e-11	Insoluble	High	No	Yes	Yes	Yes	Yes	No	No	-6.44	1	2	0	0	0	0.55	0	0	2	4.31
ZINC000014957992	c1ccc(-c2cc(-c3nnn[nH]3)cnc2-c2ccc(CNCc3ccc(-c4csnn4)cc3)cc2)cc1	C28H22N8S	502.59	37	34	0.07	8	7	2	144.25	133.4	3.41	4.47	5.1	3.32	6.39	4.54	-5.92	0.000598	1.19e-06	Moderately soluble	-6.99	5.13e-05	1.02e-07	Poorly soluble	-11.91	6.23e-10	1.24e-12	Insoluble	Low	No	Yes	No	No	No	No	No	-6.19	1	2	0	1	0	0.55	0	0	3	3.85
ZINC000014957996	Fc1ccc2nc(C3CCN(Cc4ccc(-c5ncc(-c6nnn[nH]6)cc5-c5ccccc5)cc4)CC3)[nH]c2c1	C31H27FN8	530.6	40	32	0.19	6	7	2	156.08	99.27	2.95	5.2	5.88	4.42	6.19	4.93	-6.6	0.000133	2.5e-07	Poorly soluble	-7.03	4.93e-05	9.29e-08	Poorly soluble	-11.66	1.15e-09	2.17e-12	Insoluble	Low	No	No	Yes	No	Yes	No	No	-5.84	2	3	0	0	1	0.17	0	0	2	4.39
ZINC000014958000	Cc1ccc2nc(C3CCN(Cc4ccc(-c5ncc(-c6nnn[nH]6)cc5-c5ccccc5)cc4)CC3)[nH]c2c1	C32H30N8	526.63	40	32	0.22	6	6	2	161.08	99.27	2.98	5.47	5.63	4.25	6.3	4.93	-6.75	9.42e-05	1.79e-07	Poorly soluble	-7.31	2.57e-05	4.87e-08	Poorly soluble	-11.78	8.82e-10	1.67e-12	Insoluble	High	No	No	Yes	No	Yes	No	No	-5.63	2	3	0	0	1	0.17	0	0	2	4.39
ZINC000014958004	c1ccc(-c2cc(-c3nnn[nH]3)cnc2-c2ccc(CN3CCC(c4nc5ccccc5[nH]4)CC3)cc2)cc1	C31H28N8	512.61	39	32	0.19	6	6	2	156.12	99.27	3.1	5.1	5.32	4.06	5.78	4.67	-6.44	0.000185	3.61e-07	Poorly soluble	-6.93	6.05e-05	1.18e-07	Poorly soluble	-11.4	2.02e-09	3.94e-12	Insoluble	High	No	No	Yes	No	Yes	No	No	-5.81	1	2	0	0	1	0.55	0	0	2	4.27
ZINC000014958008	c1ccc(-c2cc(-c3nnn[nH]3)cnc2-c2ccc(CN3CCC(n4cnc5ccccc54)CC3)cc2)cc1	C31H28N8	512.61	39	32	0.19	6	6	1	156.05	88.41	3.31	4.93	5.25	4.06	4.73	4.45	-6.34	0.000237	4.62e-07	Poorly soluble	-6.52	0.000154	2.99e-07	Poorly soluble	-10.58	1.35e-08	2.63e-11	Insoluble	High	No	Yes	No	Yes	Yes	No	Yes	-5.93	1	2	0	0	0	0.55	0	0	2	4.22
ZINC000014958012	Cc1nc2ccccc2n1C1CCN(Cc2ccc(-c3ncc(-c4nnn[nH]4)cc3-c3ccccc3)cc2)CC1	C32H30N8	526.63	40	32	0.22	6	6	1	161.02	88.41	3.37	5.33	5.56	4.25	5.26	4.75	-6.66	0.000115	2.19e-07	Poorly soluble	-6.94	6.06e-05	1.15e-07	Poorly soluble	-10.95	5.9e-09	1.12e-11	Insoluble	High	No	No	No	Yes	Yes	No	Yes	-5.73	2	2	0	0	1	0.17	0	0	2	4.38
ZINC000014958179	N#Cc1ncc2nc1OCCCCCOc1cc(OCCCO)c(Cl)cc1NC(=O)N2	C20H22ClN5O5	447.87	31	12	0.4	4	8	3	118.91	138.62	2.77	2.12	2.21	0.26	2.28	1.93	-3.97	0.0475	0.000106	Soluble	-4.66	0.00975	2.18e-05	Moderately soluble	-6.27	0.000241	5.37e-07	Poorly soluble	High	No	Yes	No	No	Yes	No	Yes	-7.53	0	0	0	1	0	0.55	0	0	1	5.03
ZINC000014958346	N#Cc1ncc2nc1OCCCCCOc1cc(CCCO)c(Cl)cc1NC(=O)N2	C20H22ClN5O4	431.87	30	12	0.4	3	7	3	117.38	129.39	2.84	2.41	2.37	0.76	2.74	2.22	-4.13	0.0317	7.35e-05	Moderately soluble	-4.77	0.00735	1.7e-05	Moderately soluble	-6.54	0.000123	2.85e-07	Poorly soluble	High	No	Yes	No	No	Yes	No	Yes	-7.22	0	0	0	0	0	0.55	0	0	1	4.86
ZINC000014961592	Cc1n[nH]c2cnc(-c3cncc(OC[C@@H](N)Cc4c[nH]c5ccccc45)c3)cc12	C23H22N6O	398.46	30	24	0.17	6	5	3	117.24	105.5	2.06	2.66	3.76	1.05	4.6	2.83	-4.18	0.0262	6.57e-05	Moderately soluble	-4.53	0.0118	2.97e-05	Moderately soluble	-8.64	9.21e-07	2.31e-09	Poorly soluble	High	No	Yes	No	Yes	Yes	Yes	Yes	-6.84	0	0	0	0	0	0.55	0	0	1	3.88
ZINC000014961596	N[C@H](COc1cncc(-c2ccc3c(c2)CC(=O)N3)c1)Cc1ccccc1	C22H21N3O2	359.42	27	18	0.18	6	4	2	108.27	77.24	2.84	2.38	2.62	1.98	4.02	2.77	-3.67	0.0777	0.000216	Soluble	-3.64	0.0818	0.000228	Soluble	-7.74	6.48e-06	1.8e-08	Poorly soluble	High	Yes	Yes	No	Yes	Yes	Yes	Yes	-6.8	0	0	0	0	0	0.55	0	0	1	3.41
ZINC000014961600	N[C@H](COc1cncc(-c2ccc3c(c2)/C(=C/c2ccc[nH]2)C(=O)N3)c1)Cc1ccccc1	C27H24N4O2	436.51	33	23	0.11	7	4	3	133.02	93.03	3.07	3.33	3.84	1.96	5.17	3.47	-4.7	0.00875	2e-05	Moderately soluble	-4.96	0.00478	1.1e-05	Moderately soluble	-9.44	1.6e-07	3.66e-10	Poorly soluble	High	No	Yes	No	Yes	Yes	Yes	Yes	-6.6	0	1	0	0	0	0.55	0	1	1	4.11
ZINC000014961604	N[C@H](COc1cncc(-c2ccc3c(c2)/C(=C\c2ccco2)C(=O)N3)c1)Cc1ccccc1	C27H23N3O3	437.49	33	23	0.11	7	5	2	130.94	90.38	3.42	3.61	4.1	1.96	5.04	3.63	-4.88	0.00576	1.32e-05	Moderately soluble	-5.2	0.00279	6.38e-06	Moderately soluble	-9.44	1.6e-07	3.65e-10	Poorly soluble	High	No	Yes	No	Yes	Yes	Yes	Yes	-6.41	0	1	0	0	0	0.55	0	1	2	4.19
ZINC000014961610	Cc1n[nH]c2ccc(-c3cncc(OC[C@@H](N)Cc4cccc(F)c4)c3)cc12	C22H21FN4O	376.43	28	21	0.18	6	5	2	107.55	76.82	2.79	3.66	4.44	2.69	5.06	3.73	-4.64	0.00865	2.3e-05	Moderately soluble	-4.96	0.0041	1.09e-05	Moderately soluble	-8.42	1.43e-06	3.8e-09	Poorly soluble	High	No	Yes	No	Yes	Yes	Yes	Yes	-6	0	0	0	0	0	0.55	0	0	2	3.5
ZINC000014961615	Cc1n[nH]c2ccc(-c3cncc(OC[C@@H](N)Cc4cccc(F)c4F)c3)cc12	C22H20F2N4O	394.42	29	21	0.18	6	6	2	107.51	76.82	2.8	3.76	5	3.07	5.48	4.02	-4.79	0.00634	1.61e-05	Moderately soluble	-5.07	0.00339	8.59e-06	Moderately soluble	-8.69	8.15e-07	2.07e-09	Poorly soluble	High	No	Yes	Yes	Yes	Yes	Yes	Yes	-6.04	0	0	0	0	0	0.55	0	0	2	3.61
ZINC000014961619	Cc1n[nH]c2ccc(-c3cncc(OC[C@@H](N)Cc4ccc(F)cc4F)c3)cc12	C22H20F2N4O	394.42	29	21	0.18	6	6	2	107.51	76.82	2.81	3.76	5	3.07	5.48	4.02	-4.79	0.00634	1.61e-05	Moderately soluble	-5.07	0.00339	8.59e-06	Moderately soluble	-8.69	8.15e-07	2.07e-09	Poorly soluble	High	No	Yes	Yes	Yes	Yes	Yes	Yes	-6.04	0	0	0	0	0	0.55	0	0	2	3.56
ZINC000014961623	Cc1n[nH]c2ccc(-c3cncc(OC[C@@H](N)Cc4c(F)cccc4F)c3)cc12	C22H20F2N4O	394.42	29	21	0.18	6	6	2	107.51	76.82	2.61	3.76	5	3.07	5.48	3.98	-4.79	0.00634	1.61e-05	Moderately soluble	-5.07	0.00339	8.59e-06	Moderately soluble	-8.69	8.15e-07	2.07e-09	Poorly soluble	High	No	Yes	Yes	Yes	Yes	Yes	Yes	-6.04	0	0	0	0	0	0.55	0	0	2	3.54
ZINC000014961627	Cc1n[nH]c2ccc(-c3cncc(OC[C@@H](N)Cc4ccc(F)c(F)c4F)c3)cc12	C22H19F3N4O	412.41	30	21	0.18	6	7	2	107.47	76.82	2.69	3.86	5.56	3.44	5.9	4.29	-4.95	0.00462	1.12e-05	Moderately soluble	-5.17	0.00279	6.76e-06	Moderately soluble	-8.95	4.65e-07	1.13e-09	Poorly soluble	High	No	Yes	Yes	Yes	Yes	Yes	Yes	-6.08	0	0	0	0	0	0.55	0	1	2	3.64
ZINC000014961631	Cc1n[nH]c2ccc(-c3cncc(OC[C@@H](N)Cc4c(F)cc(F)cc4F)c3)cc12	C22H19F3N4O	412.41	30	21	0.18	6	7	2	107.47	76.82	2.63	3.86	5.56	3.44	5.9	4.28	-4.95	0.00462	1.12e-05	Moderately soluble	-5.17	0.00279	6.76e-06	Moderately soluble	-8.95	4.65e-07	1.13e-09	Poorly soluble	High	No	Yes	Yes	Yes	Yes	Yes	Yes	-6.08	0	0	0	0	0	0.55	0	0	2	3.56
ZINC000014961634	Cc1n[nH]c2ccc(-c3cncc(OC[C@@H](N)Cc4ccccc4Cl)c3)cc12	C22H21ClN4O	392.88	28	21	0.18	6	4	2	112.6	76.82	2.95	4.19	4.54	2.8	5.28	3.95	-5.07	0.00331	8.42e-06	Moderately soluble	-5.51	0.00121	3.07e-06	Moderately soluble	-8.74	7.1e-07	1.81e-09	Poorly soluble	High	No	Yes	No	Yes	Yes	Yes	Yes	-5.72	0	0	0	0	0	0.55	0	0	2	3.51
ZINC000014961638	Cc1n[nH]c2ccc(-c3cncc(OC[C@@H](N)Cc4cccc(Cl)c4)c3)cc12	C22H21ClN4O	392.88	28	21	0.18	6	4	2	112.6	76.82	2.96	4.19	4.54	2.8	5.28	3.95	-5.07	0.00331	8.42e-06	Moderately soluble	-5.51	0.00121	3.07e-06	Moderately soluble	-8.74	7.1e-07	1.81e-09	Poorly soluble	High	No	Yes	No	Yes	Yes	Yes	Yes	-5.72	0	0	0	0	0	0.55	0	0	2	3.47
ZINC000014961642	Cc1n[nH]c2ccc(-c3cncc(OC[C@@H](N)Cc4ccc(Cl)cc4)c3)cc12	C22H21ClN4O	392.88	28	21	0.18	6	4	2	112.6	76.82	2.8	4.19	4.54	2.8	5.28	3.92	-5.07	0.00331	8.42e-06	Moderately soluble	-5.51	0.00121	3.07e-06	Moderately soluble	-8.74	7.1e-07	1.81e-09	Poorly soluble	High	No	Yes	No	Yes	Yes	Yes	Yes	-5.72	0	0	0	0	0	0.55	0	0	2	3.46
ZINC000014961646	Cc1n[nH]c2ccc(-c3cncc(OC[C@@H](N)Cc4ccccc4Br)c3)cc12	C22H21BrN4O	437.33	28	21	0.18	6	4	2	115.29	76.82	2.89	4.25	4.64	2.91	5.31	4	-5.39	0.00179	4.09e-06	Moderately soluble	-5.57	0.00116	2.66e-06	Moderately soluble	-8.94	5.03e-07	1.15e-09	Poorly soluble	High	No	Yes	Yes	Yes	Yes	Yes	Yes	-5.95	0	0	0	0	0	0.55	0	0	2	3.58
ZINC000014961651	Cc1n[nH]c2ccc(-c3cncc(OC[C@@H](N)Cc4cccc(Br)c4)c3)cc12	C22H21BrN4O	437.33	28	21	0.18	6	4	2	115.29	76.82	3.08	4.25	4.64	2.91	5.31	4.04	-5.39	0.00179	4.09e-06	Moderately soluble	-5.57	0.00116	2.66e-06	Moderately soluble	-8.94	5.03e-07	1.15e-09	Poorly soluble	High	No	Yes	Yes	Yes	Yes	Yes	Yes	-5.95	0	0	0	0	0	0.55	0	0	2	3.57
ZINC000014961659	Cc1n[nH]c2ccc(-c3cncc(OC[C@@H](N)Cc4cccc(I)c4)c3)cc12	C22H21IN4O	484.33	28	21	0.18	6	4	2	120.31	76.82	3.09	4.21	4.49	3.01	5.6	4.08	-5.65	0.00107	2.22e-06	Moderately soluble	-5.53	0.00142	2.93e-06	Moderately soluble	-8.99	4.98e-07	1.03e-09	Poorly soluble	High	No	Yes	No	Yes	Yes	Yes	Yes	-6.27	0	1	0	0	0	0.55	0	1	2	3.61
ZINC000014961663	Cc1n[nH]c2ccc(-c3cncc(OC[C@@H](N)Cc4ccc(F)c(Cl)c4)c3)cc12	C22H20ClFN4O	410.87	29	21	0.18	6	5	2	112.56	76.82	3.04	4.29	5.09	3.17	5.7	4.26	-5.23	0.00242	5.89e-06	Moderately soluble	-5.62	0.000994	2.42e-06	Moderately soluble	-9.01	4.04e-07	9.84e-10	Poorly soluble	High	No	Yes	Yes	Yes	Yes	Yes	Yes	-5.76	0	0	0	0	0	0.55	0	0	2	3.51
ZINC000014961667	Cc1n[nH]c2ccc(-c3cncc(OC[C@@H](N)Cc4cccc(Cl)c4Cl)c3)cc12	C22H20Cl2N4O	427.33	29	21	0.18	6	4	2	117.61	76.82	3	4.82	5.19	3.28	5.92	4.44	-5.67	0.000922	2.16e-06	Moderately soluble	-6.17	0.000291	6.82e-07	Poorly soluble	-9.33	2e-07	4.69e-10	Poorly soluble	High	No	Yes	Yes	Yes	Yes	Yes	Yes	-5.48	0	0	0	0	0	0.55	0	0	2	3.55
ZINC000014961672	Cc1n[nH]c2ccc(-c3cncc(OC[C@@H](N)Cc4ccc(Cl)c(Cl)c4)c3)cc12	C22H20Cl2N4O	427.33	29	21	0.18	6	4	2	117.61	76.82	3.12	4.82	5.19	3.28	5.92	4.47	-5.67	0.000922	2.16e-06	Moderately soluble	-6.17	0.000291	6.82e-07	Poorly soluble	-9.33	2e-07	4.69e-10	Poorly soluble	High	No	Yes	Yes	Yes	Yes	Yes	Yes	-5.48	0	0	0	0	0	0.55	0	0	2	3.5
ZINC000014961676	Cc1n[nH]c2ccc(-c3cncc(OC[C@@H](N)Cc4cc(Cl)cc(Cl)c4)c3)cc12	C22H20Cl2N4O	427.33	29	21	0.18	6	4	2	117.61	76.82	2.96	4.82	5.19	3.28	5.92	4.43	-5.67	0.000922	2.16e-06	Moderately soluble	-6.17	0.000291	6.82e-07	Poorly soluble	-9.33	2e-07	4.69e-10	Poorly soluble	High	No	Yes	Yes	Yes	Yes	Yes	Yes	-5.48	0	0	0	0	0	0.55	0	0	2	3.51
ZINC000014961679	Cc1n[nH]c2ccc(-c3cncc(OC[C@@H](N)Cc4ccc(Br)cc4F)c3)cc12	C22H20BrFN4O	455.32	29	21	0.18	6	5	2	115.25	76.82	3.11	4.35	5.2	3.28	5.73	4.34	-5.54	0.0013	2.86e-06	Moderately soluble	-5.68	0.000955	2.1e-06	Moderately soluble	-9.2	2.87e-07	6.31e-10	Poorly soluble	High	No	Yes	Yes	Yes	Yes	Yes	Yes	-5.99	0	0	0	0	0	0.55	0	0	2	3.58
ZINC000014961683	Cc1n[nH]c2ccc(-c3cncc(OC[C@@H](N)Cc4ccc(Br)c(F)c4)c3)cc12	C22H20BrFN4O	455.32	29	21	0.18	6	5	2	115.25	76.82	3.13	4.35	5.2	3.28	5.73	4.34	-5.54	0.0013	2.86e-06	Moderately soluble	-5.68	0.000955	2.1e-06	Moderately soluble	-9.2	2.87e-07	6.31e-10	Poorly soluble	High	No	Yes	Yes	Yes	Yes	Yes	Yes	-5.99	0	0	0	0	0	0.55	0	0	2	3.57
ZINC000014961687	Cc1n[nH]c2ccc(-c3cncc(OC[C@@H](N)Cc4c(F)cc(F)cc4Br)c3)cc12	C22H19BrF2N4O	473.31	30	21	0.18	6	6	2	115.21	76.82	3.09	4.45	5.76	3.65	6.16	4.62	-5.7	0.000944	2e-06	Moderately soluble	-5.78	0.000782	1.65e-06	Moderately soluble	-9.46	1.64e-07	3.46e-10	Poorly soluble	High	No	Yes	Yes	Yes	Yes	Yes	Yes	-6.03	0	1	0	0	0	0.55	0	0	2	3.69
ZINC000014961691	Cc1ccc(F)cc1C[C@H](N)COc1cncc(-c2ccc3[nH]nc(C)c3c2)c1	C23H23FN4O	390.45	29	21	0.22	6	5	2	112.52	76.82	2.95	4.03	4.75	2.91	5.58	4.04	-4.94	0.00449	1.15e-05	Moderately soluble	-5.35	0.00176	4.5e-06	Moderately soluble	-8.8	6.25e-07	1.6e-09	Poorly soluble	High	No	Yes	No	Yes	Yes	Yes	Yes	-5.82	0	0	0	0	0	0.55	0	0	2	3.65
ZINC000014961696	Cc1cc(C[C@H](N)COc2cncc(-c3ccc4[nH]nc(C)c4c3)c2)ccc1Br	C23H23BrN4O	451.36	29	21	0.22	6	4	2	120.26	76.82	3.22	4.62	4.95	3.12	5.84	4.35	-5.69	0.000924	2.05e-06	Moderately soluble	-5.96	0.000497	1.1e-06	Moderately soluble	-9.31	2.2e-07	4.88e-10	Poorly soluble	High	No	Yes	Yes	Yes	Yes	Yes	Yes	-5.77	0	0	0	0	0	0.55	0	0	2	3.62
ZINC000014961700	Cc1cc(C[C@H](N)COc2cncc(-c3ccc4[nH]nc(C)c4c3)c2)ccc1F	C23H23FN4O	390.45	29	21	0.22	6	5	2	112.52	76.82	2.74	4.03	4.75	2.91	5.58	4	-4.94	0.00449	1.15e-05	Moderately soluble	-5.35	0.00176	4.5e-06	Moderately soluble	-8.8	6.25e-07	1.6e-09	Poorly soluble	High	No	Yes	No	Yes	Yes	Yes	Yes	-5.82	0	0	0	0	0	0.55	0	0	2	3.58
ZINC000014961704	Cc1cc(F)ccc1C[C@H](N)COc1cncc(-c2ccc3[nH]nc(C)c3c2)c1	C23H23FN4O	390.45	29	21	0.22	6	5	2	112.52	76.82	2.98	4.03	4.75	2.91	5.58	4.05	-4.94	0.00449	1.15e-05	Moderately soluble	-5.35	0.00176	4.5e-06	Moderately soluble	-8.8	6.25e-07	1.6e-09	Poorly soluble	High	No	Yes	No	Yes	Yes	Yes	Yes	-5.82	0	0	0	0	0	0.55	0	0	2	3.6
ZINC000014961708	Cc1ccc(C[C@H](N)COc2cncc(-c3ccc4[nH]nc(C)c4c3)c2)cc1F	C23H23FN4O	390.45	29	21	0.22	6	5	2	112.52	76.82	3.04	4.03	4.75	2.91	5.58	4.06	-4.94	0.00449	1.15e-05	Moderately soluble	-5.35	0.00176	4.5e-06	Moderately soluble	-8.8	6.25e-07	1.6e-09	Poorly soluble	High	No	Yes	No	Yes	Yes	Yes	Yes	-5.82	0	0	0	0	0	0.55	0	0	2	3.62
ZINC000014961712	Cc1cc(C)c(C[C@H](N)COc2cncc(-c3ccc4[nH]nc(C)c4c3)c2)c(C)c1	C25H28N4O	400.52	30	21	0.28	6	4	2	122.49	76.82	3.21	4.66	4.81	2.95	6.21	4.37	-5.38	0.00167	4.16e-06	Moderately soluble	-6	0.0004	1e-06	Poorly soluble	-9.28	2.09e-07	5.21e-10	Poorly soluble	High	No	Yes	No	Yes	Yes	Yes	Yes	-5.43	0	0	0	0	0	0.55	0	0	2	3.81
ZINC000014961716	COc1ccc(F)cc1C[C@H](N)COc1cncc(-c2ccc3[nH]nc(C)c3c2)c1	C23H23FN4O2	406.45	30	21	0.22	7	6	2	114.04	86.05	3.08	3.63	4.45	2.36	5.12	3.73	-4.7	0.00806	1.98e-05	Moderately soluble	-5.13	0.00305	7.5e-06	Moderately soluble	-8.52	1.22e-06	3e-09	Poorly soluble	High	No	Yes	Yes	Yes	Yes	Yes	Yes	-6.2	0	0	0	0	0	0.55	0	0	2	3.73
ZINC000014961720	Cc1n[nH]c2ccc(-c3cncc(OC[C@@H](N)Cc4cccc(C(F)(F)F)c4)c3)cc12	C23H21F3N4O	426.43	31	21	0.22	7	7	2	112.59	76.82	2.91	4.45	6.05	3.12	5.71	4.45	-5.33	0.00201	4.71e-06	Moderately soluble	-5.78	0.000704	1.65e-06	Moderately soluble	-8.98	4.42e-07	1.04e-09	Poorly soluble	High	No	Yes	Yes	Yes	Yes	Yes	Yes	-5.74	0	1	0	1	0	0.55	0	0	2	3.62
ZINC000014961724	Cc1n[nH]c2ccc(-c3cncc(OC[C@@H](N)Cc4ccc(C(F)(F)F)cc4)c3)cc12	C23H21F3N4O	426.43	31	21	0.22	7	7	2	112.59	76.82	2.76	4.45	6.05	3.12	5.71	4.42	-5.33	0.00201	4.71e-06	Moderately soluble	-5.78	0.000704	1.65e-06	Moderately soluble	-8.98	4.42e-07	1.04e-09	Poorly soluble	High	No	Yes	Yes	Yes	Yes	Yes	Yes	-5.74	0	1	0	1	0	0.55	0	0	2	3.58
ZINC000014961728	Cc1n[nH]c2ccc(-c3cncc(OC[C@@H](N)Cc4cc(C(F)(F)F)cc(C(F)(F)F)c4)c3)cc12	C24H20F6N4O	494.43	35	21	0.25	8	10	2	117.6	76.82	3.13	5.33	8.22	3.89	6.81	5.48	-6.18	0.000327	6.62e-07	Poorly soluble	-6.7	9.97e-05	2.02e-07	Poorly soluble	-9.8	7.84e-08	1.58e-10	Poorly soluble	Low	No	Yes	Yes	No	No	Yes	Yes	-5.53	0	2	0	1	1	0.55	0	0	3	3.77
ZINC000014961732	Cc1n[nH]c2ccc(-c3cncc(OC[C@@H](N)Cc4ccc(F)c(C(F)(F)F)c4)c3)cc12	C23H20F4N4O	444.42	32	21	0.22	7	8	2	112.55	76.82	2.98	4.55	6.61	3.49	6.13	4.75	-5.49	0.00145	3.27e-06	Moderately soluble	-5.89	0.000578	1.3e-06	Moderately soluble	-9.25	2.52e-07	5.68e-10	Poorly soluble	Low	No	Yes	Yes	Yes	No	Yes	Yes	-5.78	0	1	0	1	0	0.55	0	0	2	3.67
ZINC000014961736	Cc1n[nH]c2ccc(-c3cncc(OC[C@@H](N)Cc4cc(F)cc(C(F)(F)F)c4)c3)cc12	C23H20F4N4O	444.42	32	21	0.22	7	8	2	112.55	76.82	3.05	4.55	6.61	3.49	6.13	4.77	-5.49	0.00145	3.27e-06	Moderately soluble	-5.89	0.000578	1.3e-06	Moderately soluble	-9.25	2.52e-07	5.68e-10	Poorly soluble	Low	No	Yes	Yes	Yes	No	Yes	Yes	-5.78	0	1	0	1	0	0.55	0	0	2	3.71
ZINC000014961741	Cc1n[nH]c2ccc(-c3cncc(OC[C@@H](N)Cc4cc(C(F)(F)F)ccc4F)c3)cc12	C23H20F4N4O	444.42	32	21	0.22	7	8	2	112.55	76.82	3.15	4.55	6.61	3.49	6.13	4.79	-5.49	0.00145	3.27e-06	Moderately soluble	-5.89	0.000578	1.3e-06	Moderately soluble	-9.25	2.52e-07	5.68e-10	Poorly soluble	Low	No	Yes	Yes	Yes	No	Yes	Yes	-5.78	0	1	0	1	0	0.55	0	0	2	3.74
ZINC000014961745	Cc1n[nH]c2ccc(-c3cncc(OC[C@@H](N)Cc4ccc(C(F)(F)F)c(F)c4)c3)cc12	C23H20F4N4O	444.42	32	21	0.22	7	8	2	112.55	76.82	3	4.55	6.61	3.49	6.13	4.76	-5.49	0.00145	3.27e-06	Moderately soluble	-5.89	0.000578	1.3e-06	Moderately soluble	-9.25	2.52e-07	5.68e-10	Poorly soluble	Low	No	Yes	Yes	Yes	No	Yes	Yes	-5.78	0	1	0	1	0	0.55	0	0	2	3.67
ZINC000014961749	Cc1n[nH]c2ccc(-c3cncc(OC[C@@H](N)Cc4ccc(C(F)(F)F)cc4F)c3)cc12	C23H20F4N4O	444.42	32	21	0.22	7	8	2	112.55	76.82	3.01	4.55	6.61	3.49	6.13	4.76	-5.49	0.00145	3.27e-06	Moderately soluble	-5.89	0.000578	1.3e-06	Moderately soluble	-9.25	2.52e-07	5.68e-10	Poorly soluble	Low	No	Yes	Yes	Yes	No	Yes	Yes	-5.78	0	1	0	1	0	0.55	0	0	2	3.7
ZINC000014961753	Cc1n[nH]c2ccc(-c3cncc(OC[C@@H](N)Cc4ccccc4OC(F)(F)F)c3)cc12	C23H21F3N4O2	442.43	32	21	0.22	8	8	2	114.27	86.05	3	4.74	6.04	2.3	5.25	4.27	-5.53	0.00132	2.97e-06	Moderately soluble	-6.28	0.000234	5.29e-07	Poorly soluble	-8.71	8.65e-07	1.95e-09	Poorly soluble	High	No	Yes	Yes	Yes	Yes	Yes	Yes	-5.63	0	1	0	1	0	0.55	0	0	3	3.75
ZINC000014961757	Cc1n[nH]c2ccc(-c3cncc(OC[C@@H](N)Cc4cccc(OC(F)(F)F)c4)c3)cc12	C23H21F3N4O2	442.43	32	21	0.22	8	8	2	114.27	86.05	3.16	4.74	6.04	2.3	5.25	4.3	-5.53	0.00132	2.97e-06	Moderately soluble	-6.28	0.000234	5.29e-07	Poorly soluble	-8.71	8.65e-07	1.95e-09	Poorly soluble	High	No	Yes	Yes	Yes	Yes	Yes	Yes	-5.63	0	1	0	1	0	0.55	0	0	3	3.72
ZINC000014961761	Cc1n[nH]c2ccc(-c3cncc(OC[C@@H](N)Cc4ccc(OC(F)(F)F)cc4)c3)cc12	C23H21F3N4O2	442.43	32	21	0.22	8	8	2	114.27	86.05	3.15	4.74	6.04	2.3	5.25	4.3	-5.53	0.00132	2.97e-06	Moderately soluble	-6.28	0.000234	5.29e-07	Poorly soluble	-8.71	8.65e-07	1.95e-09	Poorly soluble	High	No	Yes	Yes	Yes	Yes	Yes	Yes	-5.63	0	1	0	1	0	0.55	0	0	3	3.65
ZINC000014961765	Cc1n[nH]c2ccc(-c3cncc(OC[C@@H](N)Cc4cccc(-c5ccccc5)c4)c3)cc12	C28H26N4O	434.53	33	27	0.14	7	4	2	133.03	76.82	3.36	5.19	5.55	3.34	6.21	4.73	-5.95	0.000491	1.13e-06	Moderately soluble	-6.55	0.000122	2.82e-07	Poorly soluble	-10.61	1.08e-08	2.48e-11	Insoluble	High	No	Yes	No	No	Yes	Yes	Yes	-5.27	0	1	0	0	1	0.55	0	0	2	3.86
ZINC000014961768	Cc1n[nH]c2ccc(-c3cncc(OC[C@@H](N)Cc4ccc5c(c4)OCO5)c3)cc12	C23H22N4O3	402.45	30	21	0.22	6	6	2	113.65	95.28	2.87	3.38	3.61	1.86	4.49	3.24	-4.59	0.0104	2.59e-05	Moderately soluble	-5.06	0.00351	8.72e-06	Moderately soluble	-7.87	5.4e-06	1.34e-08	Poorly soluble	High	No	Yes	No	Yes	Yes	Yes	Yes	-6.36	0	0	0	0	0	0.55	0	0	1	3.78
ZINC000014961773	Cc1n[nH]c2ccc(-c3cncc(OC[C@@H](N)Cc4cccc5c4OC(F)(F)O5)c3)cc12	C23H20F2N4O3	438.43	32	21	0.22	6	8	2	113.79	95.28	3.07	4.14	5.04	2.07	4.89	3.84	-5.26	0.00243	5.55e-06	Moderately soluble	-5.85	0.000622	1.42e-06	Moderately soluble	-8.39	1.8e-06	4.11e-09	Poorly soluble	High	No	Yes	Yes	Yes	Yes	Yes	Yes	-6.04	0	0	0	0	0	0.55	0	0	2	3.98
ZINC000014961777	Cc1n[nH]c2ccc(-c3cncc(OC[C@@H](N)Cc4ccc5c(c4)OC(F)(F)C(F)(F)O5)c3)cc12	C24H20F4N4O3	488.43	35	21	0.25	6	10	2	118.74	95.28	3.26	4.82	6.52	2.08	5.54	4.44	-5.95	0.000544	1.11e-06	Moderately soluble	-6.55	0.000136	2.79e-07	Poorly soluble	-9.16	3.38e-07	6.92e-10	Poorly soluble	Low	No	Yes	No	No	Yes	Yes	Yes	-5.86	0	2	0	1	0	0.55	0	1	2	4.08
ZINC000014961781	Cc1n[nH]c2ccc(-c3cncc(OC[C@@H](N)Cc4cccc(OCCN5CCOCC5)c4)c3)cc12	C28H33N5O3	487.59	36	21	0.36	10	7	2	143.9	98.52	3.95	3.2	3.21	1.42	4.87	3.33	-4.65	0.0109	2.23e-05	Moderately soluble	-4.94	0.00559	1.15e-05	Moderately soluble	-8.77	8.26e-07	1.69e-09	Poorly soluble	High	No	Yes	No	No	Yes	Yes	Yes	-7	0	2	0	0	0	0.55	0	0	2	4.28
ZINC000014961785	Cc1n[nH]c2ccc(-c3cncc(OC[C@@H](N)Cc4cccc(OCCC5CCNCC5)c4)c3)cc12	C29H35N5O2	485.62	36	21	0.38	10	6	3	147.53	98.08	3.86	4.21	4.27	2.41	5.68	4.08	-5.27	0.00258	5.31e-06	Moderately soluble	-5.98	0.000509	1.05e-06	Moderately soluble	-9.8	7.77e-08	1.6e-10	Poorly soluble	High	No	Yes	No	Yes	No	Yes	Yes	-6.27	0	3	0	0	0	0.55	0	0	3	4.29
ZINC000014961789	Cc1n[nH]c2ccc(-c3cncc(OC[C@@H](N)Cc4cccc(OCC5CCNCC5)c4)c3)cc12	C28H33N5O2	471.59	35	21	0.36	9	6	3	142.72	98.08	3.63	3.85	3.88	2.21	5.28	3.77	-5.04	0.00431	9.13e-06	Moderately soluble	-5.61	0.00117	2.48e-06	Moderately soluble	-9.41	1.85e-07	3.93e-10	Poorly soluble	High	No	Yes	No	Yes	No	Yes	Yes	-6.44	0	1	0	0	0	0.55	0	0	3	4.18
ZINC000014961793	Cc1n[nH]c2ccc(-c3cncc(OC[C@@H](N)Cc4cccc(OCC5CCCCC5)c4)c3)cc12	C29H34N4O2	470.61	35	21	0.38	9	5	2	140.81	86.05	3.91	5.9	5.84	3.2	6.24	5.02	-6.32	0.000223	4.73e-07	Poorly soluble	-7.48	1.56e-05	3.31e-08	Poorly soluble	-9.63	1.09e-07	2.32e-10	Poorly soluble	High	No	Yes	No	Yes	No	Yes	Yes	-4.98	0	2	0	0	1	0.55	0	0	3	4.31
ZINC000014961797	Cc1n[nH]c2ccc(-c3cncc(OC[C@@H](N)Cc4cccc(OCC5CCN(C)CC5)c4)c3)cc12	C29H35N5O2	485.62	36	21	0.38	9	6	2	147.62	89.29	3.89	4.32	4.22	2.41	5.23	4.01	-5.41	0.00189	3.89e-06	Moderately soluble	-5.91	0.000599	1.23e-06	Moderately soluble	-9.06	4.2e-07	8.65e-10	Poorly soluble	High	No	Yes	No	Yes	No	Yes	Yes	-6.2	0	3	0	0	0	0.55	0	0	3	4.29
ZINC000014961800	Cc1n[nH]c2ccc(-c3cncc(OC[C@@H](N)Cc4cccc(OCCN)c4)c3)cc12	C24H27N5O2	417.5	31	21	0.25	9	6	3	121.6	112.07	2.88	2.59	3.22	1.4	4.25	2.87	-3.97	0.045	0.000108	Soluble	-4.59	0.0107	2.56e-05	Moderately soluble	-8.3	2.11e-06	5.05e-09	Poorly soluble	High	No	Yes	No	Yes	No	Yes	Yes	-7.01	0	0	0	0	0	0.55	0	0	2	3.85
ZINC000014961804	N[C@H](COc1cncc(-c2cc3cn[nH]c3cn2)c1)Cc1cccc(C(F)(F)F)c1	C21H18F3N5O	413.4	30	21	0.19	7	8	2	105.42	89.71	2.47	3.01	5.14	1.88	4.62	3.42	-4.36	0.0182	4.41e-05	Moderately soluble	-4.56	0.0114	2.76e-05	Moderately soluble	-8.24	2.4e-06	5.81e-09	Poorly soluble	High	No	Yes	Yes	Yes	Yes	Yes	Yes	-6.68	0	0	0	0	0	0.55	0	0	1	3.66
ZINC000014961808	N[C@H](COc1cncc(-c2cc3c(Cl)n[nH]c3cn2)c1)Cc1cccc(C(F)(F)F)c1	C21H17ClF3N5O	447.84	31	21	0.19	7	8	2	110.43	89.71	2.74	3.97	5.79	2.36	5.26	4.03	-5.16	0.00312	6.97e-06	Moderately soluble	-5.55	0.00125	2.79e-06	Moderately soluble	-8.82	6.78e-07	1.51e-09	Poorly soluble	High	No	Yes	Yes	Yes	Yes	Yes	Yes	-6.21	0	1	0	0	0	0.55	0	0	2	3.71
ZINC000014961812	Cc1n[nH]c2cnc(-c3cncc(OC[C@@H](N)Cc4cccc(F)c4F)c3)cc12	C21H19F2N5O	395.41	29	21	0.19	6	7	2	105.3	89.71	2.51	2.73	4.4	2.04	4.91	3.32	-4.15	0.0279	7.06e-05	Moderately soluble	-4.27	0.0213	5.39e-05	Moderately soluble	-8.31	1.93e-06	4.89e-09	Poorly soluble	High	No	Yes	Yes	Yes	Yes	Yes	Yes	-6.77	0	0	0	0	0	0.55	0	0	1	3.79
ZINC000014962157	N[C@H](COc1cncc(-c2ccc3[nH]nc(Cl)c3c2)c1)Cc1c[nH]c2ccccc12	C23H20ClN5O	417.89	30	24	0.13	6	4	3	119.49	92.61	2.67	4.25	4.71	2.59	5.29	3.9	-5.3	0.00207	4.96e-06	Moderately soluble	-5.91	0.000519	1.24e-06	Moderately soluble	-9.22	2.52e-07	6.03e-10	Poorly soluble	High	No	Yes	No	Yes	Yes	Yes	Yes	-5.83	0	0	0	0	0	0.55	0	0	2	3.59
ZINC000014962160	N[C@H](COc1cncc(-c2ccc3[nH]nc(C(F)(F)F)c3c2)c1)Cc1c[nH]c2ccccc12	C24H20F3N5O	451.44	33	24	0.17	7	7	3	119.48	92.61	2.53	4.21	6.23	2.64	5.71	4.26	-5.37	0.00194	4.29e-06	Moderately soluble	-5.86	0.000616	1.37e-06	Moderately soluble	-9.46	1.57e-07	3.48e-10	Poorly soluble	Low	No	Yes	Yes	Yes	Yes	Yes	Yes	-6.06	0	1	0	1	0	0.55	0	0	2	3.71
ZINC000014962164	N[C@H](COc1cncc(-c2cc3cn[nH]c3cc2[N+](=O)[O-])c1)Cc1c[nH]c2ccccc12	C23H20N6O3	428.44	32	24	0.13	7	6	3	123.3	138.43	1.71	3.12	3.96	0.97	2.48	2.45	-4.55	0.0119	2.79e-05	Moderately soluble	-5.7	0.000863	2.01e-06	Moderately soluble	-7.97	4.55e-06	1.06e-08	Poorly soluble	Low	No	Yes	No	Yes	Yes	Yes	Yes	-6.7	0	0	0	1	0	0.55	0	2	1	3.94
ZINC000014962168	Nc1cc2[nH]ncc2cc1-c1cncc(OC[C@@H](N)Cc2c[nH]c3ccccc23)c1	C23H22N6O	398.46	30	24	0.13	6	4	4	118.89	118.63	1.81	2.61	3.65	1.31	3.93	2.66	-4.15	0.0282	7.07e-05	Moderately soluble	-4.75	0.00707	1.77e-05	Moderately soluble	-8.26	2.18e-06	5.47e-09	Poorly soluble	High	No	Yes	No	Yes	No	Yes	Yes	-6.88	0	0	0	0	0	0.55	0	1	1	3.75
ZINC000014962172	Nc1cc2[nH]nc(Cl)c2cc1-c1cncc(OC[C@@H](N)Cc2c[nH]c3ccccc23)c1	C23H21ClN6O	432.91	31	24	0.13	6	4	4	123.9	118.63	2.15	3.57	4.3	2.06	4.57	3.33	-4.95	0.00486	1.12e-05	Moderately soluble	-5.75	0.000775	1.79e-06	Moderately soluble	-8.85	6.16e-07	1.42e-09	Poorly soluble	High	No	Yes	No	Yes	Yes	Yes	Yes	-6.41	0	0	0	0	0	0.55	0	1	2	3.79
ZINC000014962176	N[C@H](COc1cncc(-c2cc3cn[nH]c3cn2)c1)Cc1c[nH]c2ccccc12	C22H20N6O	384.43	29	24	0.14	6	5	3	112.28	105.5	1.71	2.25	3.45	0.83	4.08	2.47	-3.86	0.0534	0.000139	Soluble	-4.1	0.0304	7.92e-05	Moderately soluble	-8.26	2.11e-06	5.48e-09	Poorly soluble	High	No	Yes	No	Yes	Yes	Yes	Yes	-7.05	0	0	0	0	0	0.55	0	0	1	3.73
ZINC000014962179	N[C@H](COc1cncc(-c2cc3cn[nH]c3cn2)c1)Cc1ccccc1	C20H19N5O	345.4	26	21	0.15	6	5	2	100.42	89.71	2.3	2.13	2.97	1.06	3.56	2.4	-3.53	0.103	0.000298	Soluble	-3.65	0.0781	0.000226	Soluble	-7.4	1.37e-05	3.95e-08	Poorly soluble	High	No	Yes	No	Yes	Yes	Yes	Yes	-6.89	0	0	0	0	0	0.55	0	0	0	3.53
ZINC000014962183	Cc1n[nH]c2cnc(-c3cncc(OC[C@@H](N)Cc4ccccc4)c3)cc12	C21H21N5O	359.42	27	21	0.19	6	5	2	105.39	89.71	2.5	2.53	3.28	1.29	4.07	2.73	-3.84	0.0517	0.000144	Soluble	-4.06	0.0313	8.7e-05	Moderately soluble	-7.78	5.95e-06	1.66e-08	Poorly soluble	High	No	Yes	No	Yes	Yes	Yes	Yes	-6.7	0	0	0	0	0	0.55	0	0	1	3.69
ZINC000014962186	N[C@H](COc1cncc(-c2cc3c(Cl)n[nH]c3cn2)c1)Cc1ccccc1	C20H18ClN5O	379.84	27	21	0.15	6	5	2	105.43	89.71	1.99	3.09	3.62	1.82	4.19	2.94	-4.32	0.0181	4.77e-05	Moderately soluble	-4.64	0.00867	2.28e-05	Moderately soluble	-7.99	3.85e-06	1.01e-08	Poorly soluble	High	No	Yes	No	Yes	Yes	Yes	Yes	-6.42	0	0	0	0	0	0.55	0	0	1	3.59
ZINC000014962190	Cc1n[nH]c2c[n+]([O-])c(-c3cncc(OC[C@@H](N)Cc4ccccc4)c3)cc12	C21H21N5O2	375.42	28	21	0.19	6	5	2	108.75	102.28	1.7	1.53	2.52	1.57	2.77	2.02	-3.29	0.192	0.000512	Soluble	-3.29	0.194	0.000517	Soluble	-6.37	0.00016	4.26e-07	Poorly soluble	High	No	Yes	No	Yes	No	Yes	Yes	-7.5	0	0	0	0	0	0.55	0	2	1	3.96
ZINC000014962194	C=Cc1n[nH]c2cnc(-c3cncc(OC[C@@H](N)Cc4ccccc4)c3)cc12	C22H21N5O	371.44	28	21	0.14	7	5	2	110.51	89.71	2.56	2.94	3.5	1.43	4.45	2.98	-4.09	0.0303	8.16e-05	Moderately soluble	-4.49	0.0121	3.27e-05	Moderately soluble	-7.83	5.48e-06	1.48e-08	Poorly soluble	High	No	Yes	No	Yes	Yes	Yes	Yes	-6.48	0	0	0	0	0	0.55	0	0	1	3.8
ZINC000014962198	N[C@H](COc1cncc(-c2cc3c(-c4ccco4)n[nH]c3cn2)c1)Cc1ccccc1	C24H21N5O2	411.46	31	26	0.12	7	6	2	118.12	102.85	2.75	2.89	4.23	0.95	4.49	3.06	-4.37	0.0175	4.26e-05	Moderately soluble	-4.71	0.00802	1.95e-05	Moderately soluble	-9.08	3.41e-07	8.28e-10	Poorly soluble	High	No	Yes	No	No	Yes	Yes	Yes	-6.76	0	0	0	0	0	0.55	0	0	1	4.06
ZINC000014962202	Cn1cccc1-c1n[nH]c2cnc(-c3cncc(OC[C@@H](N)Cc4ccccc4)c3)cc12	C25H24N6O	424.5	32	26	0.16	7	5	2	125.11	94.64	3.1	2.57	3.97	1.16	4.1	2.98	-4.23	0.025	5.89e-05	Moderately soluble	-4.21	0.0264	6.23e-05	Moderately soluble	-8.63	9.97e-07	2.35e-09	Poorly soluble	High	No	Yes	No	No	Yes	Yes	Yes	-7.06	0	0	0	0	0	0.55	0	0	1	4.03
ZINC000014962206	N[C@H](COc1cncc(-c2cc3c(-c4ccccc4)n[nH]c3cn2)c1)Cc1ccccc1	C26H23N5O	421.49	32	27	0.12	7	5	2	125.86	89.71	2.55	3.79	4.64	2.13	5.11	3.64	-5	0.00418	9.92e-06	Moderately soluble	-5.37	0.00181	4.29e-06	Moderately soluble	-9.86	5.83e-08	1.38e-10	Poorly soluble	High	No	Yes	No	No	Yes	Yes	Yes	-6.18	0	0	0	0	0	0.55	0	0	2	3.99
ZINC000014962351	N[C@H](COc1cncc(-c2cc3ccncc3s2)c1)Cc1c[nH]c2ccccc12	C23H20N4OS	400.5	29	24	0.13	6	4	2	118.01	105.06	2.86	3.64	4.79	1.85	5.77	3.78	-4.83	0.00589	1.47e-05	Moderately soluble	-5.53	0.00117	2.92e-06	Moderately soluble	-8.68	8.41e-07	2.1e-09	Poorly soluble	High	No	Yes	No	Yes	Yes	Yes	Yes	-6.16	0	0	0	0	0	0.55	0	0	2	3.88
ZINC000014962367	N[C@H](COc1cncc(-c2ccc3c(c2)CC(=O)N3)c1)Cc1c[nH]c2ccccc12	C24H22N4O2	398.46	30	21	0.17	6	4	3	120.12	93.03	2.79	2.51	3.1	1.72	4.55	2.93	-4.01	0.0386	9.69e-05	Moderately soluble	-4.11	0.031	7.77e-05	Moderately soluble	-8.6	1e-06	2.52e-09	Poorly soluble	High	No	Yes	Yes	Yes	Yes	Yes	Yes	-6.95	0	0	0	0	0	0.55	0	0	1	3.64
ZINC000014962371	N[C@H](COc1cncc(-c2cnc3c(c2)CC(=O)N3)c1)Cc1c[nH]c2ccccc12	C23H21N5O2	399.45	30	21	0.17	6	5	3	117.92	105.92	2.58	1.77	2.5	1.12	3.98	2.39	-3.55	0.112	0.000279	Soluble	-3.61	0.0975	0.000244	Soluble	-8.23	2.37e-06	5.94e-09	Poorly soluble	High	No	Yes	No	Yes	Yes	Yes	Yes	-7.48	0	0	0	0	0	0.55	0	0	1	3.7
ZINC000014962375	N[C@H](COc1cncc(-c2ccc3c(c2)C(=O)C(=O)N3)c1)Cc1c[nH]c2ccccc12	C24H20N4O3	412.44	31	21	0.12	6	5	3	120.54	110.1	2.14	2.45	2.74	0.85	4.24	2.48	-4.05	0.0371	9e-05	Moderately soluble	-4.41	0.0162	3.93e-05	Moderately soluble	-8.48	1.38e-06	3.34e-09	Poorly soluble	High	No	Yes	Yes	Yes	Yes	Yes	Yes	-7.08	0	0	0	0	0	0.55	0	1	1	3.65
ZINC000014962395	N[C@H](COc1cncc(-c2ccc3[nH]c(=O)oc3c2)c1)Cc1c[nH]c2ccccc12	C23H20N4O3	400.43	30	24	0.13	6	5	3	115.22	109.93	2.6	2.87	3.61	1.65	4.66	3.08	-4.33	0.0189	4.71e-05	Moderately soluble	-4.84	0.00582	1.45e-05	Moderately soluble	-8.53	1.18e-06	2.95e-09	Poorly soluble	High	No	Yes	No	Yes	Yes	Yes	Yes	-6.7	0	0	0	0	0	0.55	0	0	1	3.95
ZINC000014962401	N[C@H](COc1cncc(-c2ccc3[nH]c(=O)sc3c2)c1)Cc1c[nH]c2ccccc12	C23H20N4O2S	416.5	30	24	0.13	6	4	3	120.83	125.03	2.67	3.41	4.08	2.04	5.91	3.62	-4.77	0.00713	1.71e-05	Moderately soluble	-5.72	0.000802	1.93e-06	Moderately soluble	-8.57	1.12e-06	2.68e-09	Poorly soluble	High	No	Yes	No	Yes	Yes	Yes	Yes	-6.42	0	0	0	0	0	0.55	0	0	1	3.76
ZINC000014962421	C[C@H]1C(=O)Nc2ccc(-c3cncc(OC[C@@H](N)Cc4c[nH]c5ccccc45)c3)cc21	C25H24N4O2	412.48	31	21	0.2	6	4	3	124.93	93.03	2.89	3.08	3.66	1.93	4.66	3.24	-4.44	0.0149	3.61e-05	Moderately soluble	-4.7	0.00821	1.99e-05	Moderately soluble	-8.74	7.44e-07	1.8e-09	Poorly soluble	High	No	Yes	No	Yes	Yes	Yes	Yes	-6.63	0	0	0	0	0	0.55	0	0	1	4.02
ZINC000014962430	CC[C@@H]1C(=O)Nc2ccc(-c3cncc(OC[C@@H](N)Cc4c[nH]c5ccccc45)c3)cc21	C26H26N4O2	426.51	32	21	0.23	7	4	3	129.74	93.03	2.82	3.44	4.05	2.13	5.05	3.5	-4.68	0.00901	2.11e-05	Moderately soluble	-5.07	0.00359	8.42e-06	Moderately soluble	-9.13	3.13e-07	7.33e-10	Poorly soluble	High	No	Yes	No	Yes	Yes	Yes	Yes	-6.46	0	0	0	0	0	0.55	0	0	1	4.14
ZINC000014962442	CC(C)=C1C(=O)Nc2ccc(-c3cncc(OC[C@@H](N)Cc4c[nH]c5ccccc45)c3)cc21	C27H26N4O2	438.52	33	21	0.19	6	4	3	134.86	93.03	3.2	3.99	4.35	2.26	5.4	3.84	-5.15	0.00312	7.12e-06	Moderately soluble	-5.65	0.000993	2.26e-06	Moderately soluble	-9.37	1.88e-07	4.3e-10	Poorly soluble	High	No	Yes	No	Yes	Yes	Yes	Yes	-6.14	0	1	0	0	0	0.55	0	1	2	4.14
ZINC000014962446	N[C@H](COc1cncc(-c2ccc3c(c2)C(F)(F)C(=O)N3)c1)Cc1c[nH]c2ccccc12	C24H20F2N4O2	434.44	32	21	0.17	6	6	3	120.11	93.03	2.68	3.25	4.38	2.2	4.95	3.49	-4.67	0.00927	2.13e-05	Moderately soluble	-4.88	0.00576	1.33e-05	Moderately soluble	-9.11	3.34e-07	7.69e-10	Poorly soluble	High	No	Yes	Yes	Yes	Yes	Yes	Yes	-6.64	0	0	0	0	0	0.55	0	0	1	3.78
ZINC000014962515	N[C@H](COc1cnc(Cl)c(-c2ccc3cnccc3c2)c1)Cc1c[nH]c2ccccc12	C25H21ClN4O	428.91	31	25	0.12	6	4	2	125.14	76.82	2.99	4.8	5.38	2.44	5.78	4.28	-5.72	0.00081	1.89e-06	Moderately soluble	-6.15	0.000307	7.16e-07	Poorly soluble	-10	4.3e-08	1e-10	Poorly soluble	High	No	Yes	Yes	Yes	Yes	Yes	Yes	-5.51	0	0	0	0	0	0.55	0	1	2	3.76
ZINC000014962519	N#Cc1ncc(OC[C@@H](N)Cc2c[nH]c3ccccc23)cc1-c1ccc2cnccc2c1	C26H21N5O	419.48	32	25	0.12	6	5	2	124.85	100.61	3.01	3.89	4.6	1.29	5.18	3.59	-5.07	0.00354	8.44e-06	Moderately soluble	-5.7	0.000836	1.99e-06	Moderately soluble	-9.48	1.4e-07	3.33e-10	Poorly soluble	High	No	Yes	No	Yes	Yes	Yes	Yes	-6.1	0	0	0	0	0	0.55	0	0	2	3.82
ZINC000014962523	C=Cc1ncc(OC[C@@H](N)Cc2c[nH]c3ccccc23)cc1-c1ccc2cnccc2c1	C27H24N4O	420.51	32	25	0.11	7	4	2	130.22	76.82	3.5	4.65	5.26	2.3	6.05	4.35	-5.49	0.00135	3.22e-06	Moderately soluble	-5.99	0.000431	1.02e-06	Moderately soluble	-9.84	6.12e-08	1.46e-10	Poorly soluble	High	No	Yes	No	Yes	Yes	Yes	Yes	-5.56	0	1	0	0	0	0.55	0	0	2	3.89
ZINC000014962527	N[C@H](COc1cnc(-c2ccco2)c(-c2ccc3cnccc3c2)c1)Cc1c[nH]c2ccccc12	C29H24N4O2	460.53	35	30	0.1	7	5	2	137.83	89.96	3.63	4.6	5.99	1.78	6.06	4.41	-5.77	0.00079	1.72e-06	Moderately soluble	-6.21	0.000281	6.11e-07	Poorly soluble	-11.08	3.8e-09	8.26e-12	Insoluble	High	No	Yes	No	No	Yes	Yes	Yes	-5.84	0	2	0	1	0	0.55	0	0	2	4.25
ZINC000014962530	C#Cc1ncc(OC[C@@H](N)Cc2c[nH]c3ccccc23)cc1-c1ccc2cnccc2c1	C27H22N4O	418.49	32	25	0.11	6	4	2	128.07	76.82	3.31	4.12	4.79	2.3	5.89	4.08	-5.21	0.00257	6.13e-06	Moderately soluble	-5.44	0.00152	3.63e-06	Moderately soluble	-9.48	1.4e-07	3.34e-10	Poorly soluble	High	No	Yes	No	Yes	Yes	Yes	Yes	-5.93	0	0	0	0	0	0.55	0	1	2	3.9
ZINC000014962534	N[C@H](COc1cnc(C#Cc2ccccc2)c(-c2ccc3cnccc3c2)c1)Cc1c[nH]c2ccccc12	C33H26N4O	494.59	38	31	0.09	6	4	2	152.55	76.82	3.91	5.89	6.21	3.25	7.17	5.28	-6.82	7.4e-05	1.5e-07	Poorly soluble	-7.28	2.62e-05	5.29e-08	Poorly soluble	-11.91	6.02e-10	1.22e-12	Insoluble	High	No	No	Yes	No	No	No	No	-5.14	0	3	0	1	1	0.55	0	1	2	4.46
ZINC000014962538	N[C@H](COc1cc(-c2ccc3cnccc3c2)cnc1Cl)Cc1c[nH]c2ccccc12	C25H21ClN4O	428.91	31	25	0.12	6	4	2	125.14	76.82	3.27	4.8	5.38	2.44	5.78	4.33	-5.72	0.00081	1.89e-06	Moderately soluble	-6.15	0.000307	7.16e-07	Poorly soluble	-10	4.3e-08	1e-10	Poorly soluble	High	No	Yes	Yes	Yes	Yes	Yes	Yes	-5.51	0	0	0	0	0	0.55	0	1	2	3.8
ZINC000014962542	Cc1c(OC[C@@H](N)Cc2c[nH]c3ccccc23)cncc1-c1ccc2cnccc2c1	C26H24N4O	408.49	31	25	0.15	6	4	2	125.1	76.82	3.2	4.2	5.04	2.17	5.66	4.05	-5.22	0.00246	6.03e-06	Moderately soluble	-5.52	0.00123	3e-06	Moderately soluble	-9.79	6.64e-08	1.63e-10	Poorly soluble	High	No	Yes	No	Yes	Yes	Yes	Yes	-5.81	0	0	0	0	0	0.55	0	0	2	3.8
ZINC000014962547	N#C/C=C/c1c(OC[C@@H](N)Cc2c[nH]c3ccccc23)cncc1-c1ccc2cnccc2c1	C28H23N5O	445.52	34	25	0.11	7	5	2	134.78	100.61	2.96	3.98	5.15	1.62	5.79	3.9	-5.19	0.00287	6.43e-06	Moderately soluble	-5.79	0.000716	1.61e-06	Moderately soluble	-9.54	1.28e-07	2.86e-10	Poorly soluble	High	No	Yes	No	Yes	Yes	Yes	Yes	-6.19	0	1	0	0	0	0.55	0	1	2	4.21
ZINC000014962551	N[C@H](COc1cncc(-c2ccc3c(F)nccc3c2)c1)Cc1c[nH]c2ccccc12	C25H21FN4O	412.46	31	25	0.12	6	5	2	120.09	76.82	3.24	4.27	5.29	2.6	5.56	4.19	-5.29	0.00212	5.15e-06	Moderately soluble	-5.6	0.00105	2.54e-06	Moderately soluble	-9.68	8.66e-08	2.1e-10	Poorly soluble	High	No	Yes	Yes	Yes	Yes	Yes	Yes	-5.78	0	0	0	0	0	0.55	0	1	2	3.66
ZINC000014962555	N[C@H](COc1cncc(-c2ccc3c(=O)[nH]ccc3c2)c1)Cc1c[nH]c2ccccc12	C25H22N4O2	410.47	31	25	0.12	6	4	3	122.96	96.79	2.89	3.07	4.02	2.16	5.28	3.48	-4.52	0.0124	3.02e-05	Moderately soluble	-4.77	0.00698	1.7e-05	Moderately soluble	-9.31	2.02e-07	4.92e-10	Poorly soluble	High	No	Yes	No	Yes	Yes	Yes	Yes	-6.62	0	0	0	0	0	0.55	0	0	1	3.68
ZINC000014962559	N[C@H](COc1cncc(-c2ccc3c(Cl)nccc3c2)c1)Cc1c[nH]c2ccccc12	C25H21ClN4O	428.91	31	25	0.12	6	4	2	125.14	76.82	3.39	4.8	5.38	2.7	5.78	4.41	-5.72	0.00081	1.89e-06	Moderately soluble	-6.15	0.000307	7.16e-07	Poorly soluble	-10	4.3e-08	1e-10	Poorly soluble	High	No	Yes	Yes	Yes	Yes	Yes	Yes	-5.51	0	0	0	0	0	0.55	0	1	2	3.67
ZINC000014962567	Nc1nccc2cc(-c3cncc(OC[C@@H](N)Cc4c[nH]c5ccccc45)c3)ccc12	C25H23N5O	409.48	31	25	0.12	6	4	3	124.54	102.84	2.88	3.49	4.32	2.09	4.42	3.44	-4.78	0.00682	1.67e-05	Moderately soluble	-5.33	0.0019	4.65e-06	Moderately soluble	-9.04	3.72e-07	9.08e-10	Poorly soluble	High	No	Yes	No	Yes	Yes	Yes	Yes	-6.32	0	0	0	0	0	0.55	0	0	1	3.73
ZINC000014962571	N[C@H](COc1cncc(-c2ccc3cnc(F)cc3c2)c1)Cc1c[nH]c2ccccc12	C25H21FN4O	412.46	31	25	0.12	6	5	2	120.09	76.82	3.22	4.27	5.29	2.33	5.56	4.13	-5.29	0.00212	5.15e-06	Moderately soluble	-5.6	0.00105	2.54e-06	Moderately soluble	-9.68	8.66e-08	2.1e-10	Poorly soluble	High	No	Yes	No	Yes	Yes	Yes	Yes	-5.78	0	0	0	0	0	0.55	0	1	2	3.66
ZINC000014962576	N[C@H](COc1cncc(-c2ccc3cnc(Cl)cc3c2)c1)Cc1c[nH]c2ccccc12	C25H21ClN4O	428.91	31	25	0.12	6	4	2	125.14	76.82	3.41	4.8	5.38	2.44	5.78	4.36	-5.72	0.00081	1.89e-06	Moderately soluble	-6.15	0.000307	7.16e-07	Poorly soluble	-10	4.3e-08	1e-10	Poorly soluble	High	No	Yes	Yes	Yes	Yes	Yes	Yes	-5.51	0	0	0	0	0	0.55	0	1	2	3.67
ZINC000014962580	N#Cc1cc2cc(-c3cncc(OC[C@@H](N)Cc4c[nH]c5ccccc45)c3)ccc2cn1	C26H21N5O	419.48	32	25	0.12	6	5	2	124.85	100.61	3.06	3.89	4.6	1.29	5.18	3.6	-5.07	0.00354	8.44e-06	Moderately soluble	-5.7	0.000836	1.99e-06	Moderately soluble	-9.48	1.4e-07	3.33e-10	Poorly soluble	High	No	Yes	No	Yes	Yes	Yes	Yes	-6.1	0	0	0	0	0	0.55	0	0	2	3.77
ZINC000014962585	CCc1cc2cc(-c3cncc(OC[C@@H](N)Cc4c[nH]c5ccccc45)c3)ccc2cn1	C27H26N4O	422.52	32	25	0.19	7	4	2	129.9	76.82	3.49	4.67	5.29	2.37	6.06	4.38	-5.52	0.00128	3.03e-06	Moderately soluble	-6.01	0.000412	9.76e-07	Poorly soluble	-10.18	2.79e-08	6.59e-11	Insoluble	High	No	Yes	Yes	No	Yes	Yes	Yes	-5.56	0	0	0	0	0	0.55	0	0	2	3.86
ZINC000014962589	C=Cc1cc2cc(-c3cncc(OC[C@@H](N)Cc4c[nH]c5ccccc45)c3)ccc2cn1	C27H24N4O	420.51	32	25	0.11	7	4	2	130.22	76.82	3.28	4.65	5.26	2.3	6.05	4.31	-5.49	0.00135	3.22e-06	Moderately soluble	-5.99	0.000431	1.02e-06	Moderately soluble	-9.84	6.12e-08	1.46e-10	Poorly soluble	High	No	Yes	No	Yes	Yes	Yes	Yes	-5.56	0	1	0	0	0	0.55	0	0	2	3.84
ZINC000014962592	N[C@H](COc1cncc(-c2ccc3cnc(-c4ccco4)cc3c2)c1)Cc1c[nH]c2ccccc12	C29H24N4O2	460.53	35	30	0.1	7	5	2	137.83	89.96	3.48	4.6	5.99	1.78	6.06	4.38	-5.77	0.00079	1.72e-06	Moderately soluble	-6.21	0.000281	6.11e-07	Poorly soluble	-11.08	3.8e-09	8.26e-12	Insoluble	High	No	Yes	No	No	Yes	Yes	Yes	-5.84	0	2	0	1	0	0.55	0	0	2	4.17
ZINC000014962597	N[C@H](COc1cncc(-c2ccc3cnc(-c4ccccc4)cc3c2)c1)Cc1c[nH]c2ccccc12	C31H26N4O	470.56	36	31	0.1	7	4	2	145.57	76.82	3.85	5.5	6.39	2.94	6.69	5.08	-6.4	0.000188	4e-07	Poorly soluble	-6.87	6.32e-05	1.34e-07	Poorly soluble	-11.86	6.53e-10	1.39e-12	Insoluble	High	No	No	No	No	No	No	Yes	-5.27	0	2	0	1	1	0.55	0	0	2	4.06
ZINC000014962602	N[C@H](COc1cncc(-c2ccc3cnc(-c4ccncc4)cc3c2)c1)Cc1c[nH]c2ccccc12	C30H25N5O	471.55	36	31	0.1	7	5	2	143.36	89.71	3.51	4.43	5.79	1.94	6.11	4.36	-5.73	0.000879	1.86e-06	Moderately soluble	-6.03	0.000438	9.29e-07	Poorly soluble	-11.48	1.54e-09	3.27e-12	Insoluble	High	No	Yes	No	No	Yes	Yes	Yes	-6.03	0	2	0	0	0	0.55	0	0	2	4
ZINC000014962608	CC#Cc1cc2cc(-c3cncc(OC[C@@H](N)Cc4c[nH]c5ccccc45)c3)ccc2cn1	C28H24N4O	432.52	33	25	0.14	6	4	2	132.87	76.82	3.67	4.63	5.18	2.5	6.13	4.42	-5.6	0.00108	2.49e-06	Moderately soluble	-5.97	0.000465	1.07e-06	Moderately soluble	-9.85	6.11e-08	1.41e-10	Poorly soluble	High	No	Yes	No	No	Yes	Yes	Yes	-5.65	0	1	0	0	0	0.55	0	1	2	4.09
ZINC000014962612	N[C@H](COc1cncc(-c2ccc3cnc(C#Cc4ccccc4)cc3c2)c1)Cc1c[nH]c2ccccc12	C33H26N4O	494.59	38	31	0.09	6	4	2	152.55	76.82	4.02	5.89	6.21	3.25	7.17	5.31	-6.82	7.4e-05	1.5e-07	Poorly soluble	-7.28	2.62e-05	5.29e-08	Poorly soluble	-11.91	6.02e-10	1.22e-12	Insoluble	High	No	No	Yes	No	No	No	No	-5.14	0	3	0	1	1	0.55	0	1	2	4.39
ZINC000014962617	Nc1cc2cc(-c3cncc(OC[C@@H](N)Cc4c[nH]c5ccccc45)c3)ccc2cn1	C25H23N5O	409.48	31	25	0.12	6	4	3	124.54	102.84	2.8	3.49	4.32	1.82	4.42	3.37	-4.78	0.00682	1.67e-05	Moderately soluble	-5.33	0.0019	4.65e-06	Moderately soluble	-9.04	3.72e-07	9.08e-10	Poorly soluble	High	No	Yes	No	Yes	Yes	Yes	Yes	-6.32	0	0	0	0	0	0.55	0	0	1	3.73
ZINC000014962621	Nc1c(-c2cncc(OC[C@@H](N)Cc3c[nH]c4ccccc34)c2)ccc2cnccc12	C25H23N5O	409.48	31	25	0.12	6	4	3	124.54	102.84	2.7	3.16	4.32	1.42	4.42	3.2	-4.57	0.011	2.69e-05	Moderately soluble	-4.99	0.00419	1.02e-05	Moderately soluble	-9.04	3.72e-07	9.08e-10	Poorly soluble	High	No	Yes	No	Yes	Yes	Yes	Yes	-6.55	0	0	0	0	0	0.55	0	1	1	3.8
ZINC000014962625	Cc1cc(-c2cncc(OC[C@@H](N)Cc3c[nH]c4ccccc34)c2)cc2ccncc12	C26H24N4O	408.49	31	25	0.15	6	4	2	125.1	76.82	3.11	4.2	5.04	2.17	5.66	4.04	-5.22	0.00246	6.03e-06	Moderately soluble	-5.52	0.00123	3e-06	Moderately soluble	-9.79	6.64e-08	1.63e-10	Poorly soluble	High	No	Yes	No	Yes	Yes	Yes	Yes	-5.81	0	0	0	0	0	0.55	0	0	2	3.79
ZINC000014962724	C/C(=C1/C(=O)Nc2ccc(NC(N)=O)cc21)c1ccc[nH]1	C15H14N4O2	282.3	21	11	0.07	3	2	4	83.9	100.01	1.12	0.95	1.63	0.87	1.55	1.22	-2.38	1.18	0.00418	Soluble	-2.64	0.651	0.00231	Soluble	-4.67	0.00601	2.13e-05	Moderately soluble	High	No	Yes	Yes	No	No	No	No	-7.35	0	0	0	0	0	0.55	0	1	0	2.74
ZINC000015217873	CCC[C@H]1O[C@H](CC(=O)O)CC2=C1C(=O)c1c(O)cccc1C2=O	C18H18O6	330.33	24	6	0.39	4	6	2	85.46	100.9	2.25	2.2	2.5	0.63	2.71	2.06	-3.2	0.211	0.000638	Soluble	-3.95	0.0368	0.000111	Soluble	-3.74	0.0605	0.000183	Soluble	High	No	Yes	No	No	No	No	No	-6.75	0	0	0	0	0	0.56	1	0	0	4.23
ZINC000016052084	CNc1nccc(-c2ccc(C(=O)N[C@H](CN)Cc3ccc(Cl)cc3Cl)s2)n1	C19H19Cl2N5OS	436.36	28	17	0.21	8	4	3	114.48	121.17	3.06	3.85	3.66	2.34	4.84	3.55	-4.89	0.00559	1.28e-05	Moderately soluble	-6.09	0.000354	8.11e-07	Poorly soluble	-8.02	4.22e-06	9.66e-09	Poorly soluble	High	No	No	Yes	Yes	Yes	Yes	Yes	-6.23	0	0	0	0	0	0.55	0	0	3	3.76
ZINC000016052239	Cc1n[nH]c2ccc(-c3cncc(OC[C@@H](N)Cc4c[nH]c5ccccc45)c3)cc12	C24H23N5O	397.47	30	24	0.17	6	4	3	119.45	92.61	2.12	3.69	4.36	2.06	5.17	3.48	-4.83	0.00595	1.5e-05	Moderately soluble	-5.33	0.00188	4.73e-06	Moderately soluble	-9.01	3.89e-07	9.79e-10	Poorly soluble	High	No	Yes	No	Yes	Yes	Yes	Yes	-6.1	0	0	0	0	0	0.55	0	0	2	3.67
ZINC000016052297	N[C@H](COc1cncc(-c2ccc3[nH]ncc3c2)c1)Cc1c[nH]c2ccccc12	C23H21N5O	383.45	29	24	0.13	6	4	3	114.48	92.61	2.32	3.29	4.06	1.85	4.65	3.23	-4.51	0.0119	3.12e-05	Moderately soluble	-4.91	0.00472	1.23e-05	Moderately soluble	-8.63	8.91e-07	2.32e-09	Poorly soluble	High	No	Yes	No	Yes	Yes	Yes	Yes	-6.3	0	0	0	0	0	0.55	0	0	1	3.54
ZINC000016052552	O=P(O)(O)Oc1ccc(OP(=O)(O)O)c(OP(=O)(O)O)c1OP(=O)(O)O	C6H10O16P4	462.03	26	6	0	8	16	8	77.13	306.28	-2.77	-4.72	-0.43	-3.5	-3.87	-3.06	0.63	1950	4.23	Highly soluble	-1.09	38	0.0822	Very soluble	3.31	933000	2020	Soluble	Low	No	Yes	No	No	No	No	No	-12.47	2	1	1	1	4	0.11	0	1	2	3.72
ZINC000016052569	Cc1n[nH]c2ccc(-c3cncc(OC[C@@H](N)Cc4ccccc4)c3)cc12	C22H22N4O	358.44	27	21	0.18	6	4	2	107.59	76.82	2.81	3.56	3.88	2.32	4.64	3.44	-4.48	0.0117	3.28e-05	Moderately soluble	-4.86	0.00496	1.38e-05	Moderately soluble	-8.15	2.51e-06	7.01e-09	Poorly soluble	High	Yes	Yes	No	Yes	Yes	Yes	Yes	-5.96	0	0	0	0	0	0.55	0	0	2	3.44
ZINC000016052570	Cc1n[nH]c2ccc(-c3cncc(OC[C@@H](N)Cc4ccc(Br)cc4)c3)cc12	C22H21BrN4O	437.33	28	21	0.18	6	4	2	115.29	76.82	2.87	4.25	4.64	2.91	5.31	4	-5.39	0.00179	4.09e-06	Moderately soluble	-5.57	0.00116	2.66e-06	Moderately soluble	-8.94	5.03e-07	1.15e-09	Poorly soluble	High	No	Yes	Yes	Yes	Yes	Yes	Yes	-5.95	0	0	0	0	0	0.55	0	0	2	3.5
ZINC000016052630	NC1(Cc2ccc(Cl)cc2)CCN(c2ncnc3[nH]ccc23)CC1	C18H20ClN5	341.84	24	15	0.33	3	3	2	100.39	70.83	2.69	3.13	2.77	2.81	3.32	2.95	-4.2	0.0218	6.37e-05	Moderately soluble	-4.29	0.0177	5.17e-05	Moderately soluble	-6.4	0.000137	4.02e-07	Poorly soluble	High	Yes	Yes	Yes	Yes	No	Yes	Yes	-6.16	0	0	0	0	0	0.55	0	0	0	2.86
ZINC000016052714	CS(=O)(=O)N1CCN(Cc2cc3nc(-c4cccc5[nH]ncc45)nc(N4CCOCC4)c3s2)CC1	C23H27N7O3S2	513.64	35	18	0.43	5	8	1	147.7	144.17	3.01	1.62	1.93	0.94	2.57	2.01	-4.1	0.0412	8.02e-05	Moderately soluble	-4.26	0.0282	5.5e-05	Moderately soluble	-6.12	0.000391	7.6e-07	Poorly soluble	Low	No	Yes	No	Yes	Yes	Yes	Yes	-8.28	1	2	1	1	0	0.55	0	0	1	3.95
ZINC000016052800	Clc1c[nH]c2ncnc(N3CCc4[nH]cnc4C3)c12	C12H11ClN6	274.71	19	14	0.25	1	3	2	75.53	73.49	1.25	1.49	1.36	0.96	2.46	1.51	-2.96	0.3	0.00109	Soluble	-2.64	0.628	0.00229	Soluble	-4.67	0.00581	2.11e-05	Moderately soluble	High	No	Yes	Yes	No	No	Yes	Yes	-6.92	0	0	0	0	0	0.55	0	0	0	2.5
ZINC000016052801	Cc1n[nH]c(-c2ccccc2Nc2ncnc3[nH]ccc23)n1	C15H13N7	291.31	22	20	0.07	3	4	3	83.78	95.17	1.62	2.66	2.79	1.67	2.64	2.28	-3.8	0.0465	0.00016	Soluble	-4.31	0.0143	4.9e-05	Moderately soluble	-6.47	9.87e-05	3.39e-07	Poorly soluble	High	No	No	Yes	Yes	No	No	No	-6.19	0	0	0	0	0	0.55	0	0	0	2.65
ZINC000016052884	Cc1n[nH]c2ccc(-c3cncc(OC[C@H](N)Cc4ccccc4)c3)cc12	C22H22N4O	358.44	27	21	0.18	6	4	2	107.59	76.82	2.69	3.56	3.88	2.32	4.64	3.42	-4.48	0.0117	3.28e-05	Moderately soluble	-4.86	0.00496	1.38e-05	Moderately soluble	-8.15	2.51e-06	7.01e-09	Poorly soluble	High	Yes	Yes	No	Yes	Yes	Yes	Yes	-5.96	0	0	0	0	0	0.55	0	0	2	3.44
ZINC000016052885	COc1ccc(O)c(C(=O)c2ccc(CO[C@@H]3CCCNC[C@@H]3NC(=O)c3ccncc3)cc2)c1F	C27H28FN3O5	493.53	36	18	0.3	9	8	3	134.6	109.78	2.57	3.28	3.12	1.19	4.02	2.83	-4.74	0.00893	1.81e-05	Moderately soluble	-5.26	0.00271	5.49e-06	Moderately soluble	-8.07	4.18e-06	8.47e-09	Poorly soluble	High	No	Yes	No	Yes	No	Yes	Yes	-6.98	0	2	0	0	0	0.55	0	0	2	4.24
ZINC000016052892	COc1ccc(O)c(C(=O)c2ccc(C(=O)N[C@@H]3CCCNC[C@@H]3NC(=O)c3ccncc3)cc2)c1F	C27H27FN4O5	506.53	37	18	0.26	9	8	4	136.74	129.65	2.37	2.9	2.49	1.01	3.25	2.4	-4.57	0.0135	2.67e-05	Moderately soluble	-5.28	0.00264	5.21e-06	Moderately soluble	-7.91	6.19e-06	1.22e-08	Poorly soluble	High	No	Yes	No	No	No	Yes	Yes	-7.33	1	2	0	0	0	0.55	0	0	2	4.07
ZINC000016052895	COc1ccc(O)c(C(=O)c2ccc(C(=O)O[C@@H]3CCCNC[C@@H]3NC(=O)c3ccncc3)cc2)c1F	C27H26FN3O6	507.51	37	18	0.26	9	9	3	135.02	126.85	2.87	3.48	2.91	1.42	3.57	2.85	-4.94	0.00576	1.14e-05	Moderately soluble	-5.83	0.000757	1.49e-06	Moderately soluble	-7.6	1.27e-05	2.51e-08	Poorly soluble	High	No	Yes	No	No	Yes	Yes	Yes	-6.93	1	2	0	0	0	0.55	0	0	2	4.23
ZINC000019798821	O=C1COc2ccc(-c3cc(-c4ccccc4)cc(-c4ccc5oc(=O)[nH]c5c4)n3)cc2N1	C26H17N3O4	435.43	33	27	0.04	3	5	2	127.76	97.22	3	3.97	4.28	2.55	5.43	3.84	-5.45	0.00155	3.56e-06	Moderately soluble	-5.71	0.000844	1.94e-06	Moderately soluble	-10.12	3.29e-08	7.55e-11	Insoluble	High	No	Yes	Yes	No	Yes	No	No	-6.14	0	0	0	0	0	0.55	0	0	2	3.41
ZINC000028138220	Cn1nnnc1-c1cnc(-c2ccc(CN3CCC(n4c(=O)[nH]c5ccccc54)CC3)cc2)c(-c2ccccc2)c1	C32H30N8O	542.63	41	32	0.22	6	6	1	163.78	97.52	4.08	4.35	4.55	4.21	4.35	4.31	-6.13	0.000406	7.47e-07	Poorly soluble	-6.11	0.000418	7.71e-07	Poorly soluble	-10.01	5.27e-08	9.71e-11	Insoluble	High	No	Yes	Yes	Yes	Yes	No	No	-6.52	2	3	0	0	0	0.17	0	0	2	4.48
ZINC000028564954	Cc1n[nH]c2sc(C(N)=O)c(NC(=O)Nc3ccccc3)c12	C14H13N5O2S	315.35	22	14	0.07	5	3	4	85.75	141.14	1.02	2.29	2.29	1.09	2.16	1.77	-3.38	0.132	0.000418	Soluble	-4.89	0.00405	1.28e-05	Moderately soluble	-4.71	0.00618	1.96e-05	Moderately soluble	Low	No	No	Yes	No	No	No	No	-6.6	0	0	1	1	0	0.55	0	0	0	3.19
ZINC000028604220	CCOc1ccc(NC2=C(Cl)C(=O)c3[nH]ncc3C2=O)cc1	C15H12ClN3O3	317.73	22	11	0.13	4	4	2	81.31	84.08	1.63	3	2.56	0.31	3.01	2.1	-3.81	0.0497	0.000156	Soluble	-4.43	0.0118	3.72e-05	Moderately soluble	-5.79	0.000515	1.62e-06	Moderately soluble	High	No	No	Yes	Yes	Yes	No	Yes	-6.11	0	0	0	0	0	0.55	2	0	0	3.04
ZINC000028710754	COc1cc(-c2ccc3c(c2)Nc2ccc(CC(=O)Nc4ccc(N5CCOCC5)cc4)cc2NC3=O)ccc1N	C32H31N5O4	549.62	41	27	0.19	7	4	4	166.1	125.47	3.57	3.81	4.28	2.78	5.22	3.93	-5.67	0.00117	2.12e-06	Moderately soluble	-6.14	0.000398	7.25e-07	Poorly soluble	-10.49	1.77e-08	3.22e-11	Insoluble	Low	No	No	Yes	Yes	No	No	No	-6.95	1	3	0	0	0	0.55	1	1	2	3.7
ZINC000028951848	CNC(=O)Nc1ccc(CNc2c(C(=O)Nc3ccc4c(c3)OC(F)(F)C(F)(F)O4)cnn2C)cn1	C21H19F4N7O4	509.41	36	17	0.24	9	10	4	117.94	131.43	2.12	2.95	4.34	1.37	1.5	2.46	-4.61	0.0124	2.44e-05	Moderately soluble	-5.37	0.00216	4.24e-06	Moderately soluble	-7.29	2.59e-05	5.09e-08	Poorly soluble	Low	No	Yes	No	No	Yes	No	Yes	-7.31	2	1	0	0	0	0.17	0	1	2	3.62
ZINC000028951850	CNC(=O)Nc1ccc(CNc2c(C(=O)Nc3ccc(SC(F)(F)F)cc3)cnn2C)cn1	C20H20F3N7O2S	479.48	33	17	0.2	11	7	4	118.71	138.27	2.25	3.42	4.58	2.31	1.76	2.86	-4.62	0.0114	2.38e-05	Moderately soluble	-6	0.000475	9.91e-07	Poorly soluble	-7.2	3.05e-05	6.35e-08	Poorly soluble	Low	No	No	No	Yes	Yes	No	Yes	-6.8	0	0	1	1	0	0.55	0	0	2	3.27
ZINC000028951852	CCNC(=O)Nc1ccc(CNc2ncsc2C(=O)Nc2ccc3c(c2)OC(F)(F)O3)cn1	C20H18F2N6O4S	476.46	33	17	0.2	10	8	4	116.43	154.74	2.6	3.7	3.98	1.29	2.87	2.89	-4.85	0.00679	1.42e-05	Moderately soluble	-6.64	0.000109	2.29e-07	Poorly soluble	-7.41	1.88e-05	3.94e-08	Poorly soluble	Low	No	No	No	Yes	Yes	Yes	Yes	-6.58	0	0	1	1	1	0.55	0	0	3	3.66
ZINC000028951859	CNC(=O)Nc1ccc(CNc2ncsc2C(=O)Nc2ccc3c(c2)OC(F)(F)O3)cn1	C19H16F2N6O4S	462.43	32	17	0.16	9	8	4	111.62	154.74	2.26	3.33	3.59	1.06	2.48	2.54	-4.6	0.0115	2.49e-05	Moderately soluble	-6.26	0.000256	5.54e-07	Poorly soluble	-7.01	4.47e-05	9.66e-08	Poorly soluble	Low	No	No	No	No	Yes	Yes	Yes	-6.76	0	0	1	1	1	0.55	0	0	2	3.54
ZINC000028963230	N#Cc1ncc2nc1OCCCCOc1cc(NCc3cncs3)c(Cl)cc1NC(=O)N2	C20H18ClN7O3S	471.92	32	17	0.25	3	7	3	126.3	162.32	2.73	2.67	2.78	0.07	3.04	2.26	-4.64	0.0107	2.27e-05	Moderately soluble	-5.73	0.000878	1.86e-06	Moderately soluble	-7.46	1.65e-05	3.5e-08	Poorly soluble	Low	No	Yes	No	No	Yes	No	Yes	-7.28	0	0	1	1	1	0.55	0	0	1	4.9
ZINC000028980007	CSc1ncc2cc(-c3ccccc3)c(-c3ccc(CNCCC(N)=O)cc3)nc2n1	C24H23N5OS	429.54	31	22	0.17	8	5	2	125.02	119.09	3.37	3.15	3.89	2.5	4.58	3.5	-4.48	0.0141	3.27e-05	Moderately soluble	-5.32	0.00205	4.78e-06	Moderately soluble	-9.24	2.48e-07	5.77e-10	Poorly soluble	High	No	Yes	Yes	Yes	Yes	Yes	Yes	-6.68	0	0	0	0	0	0.55	0	0	2	3.09
ZINC000028980010	CSc1ncc2cc(-c3ccccc3)c(-c3ccc(CNCCCN4CCN(C)CC4)cc3)nc2n1	C29H34N6S	498.69	36	22	0.34	9	6	1	157.66	82.48	4.7	4.51	3.89	3.17	5.29	4.31	-5.63	0.00117	2.34e-06	Moderately soluble	-5.96	0.000543	1.09e-06	Moderately soluble	-10.15	3.53e-08	7.08e-11	Insoluble	High	No	Yes	No	Yes	Yes	Yes	Yes	-6.14	0	2	0	0	0	0.55	0	0	3	3.75
ZINC000028980013	CSc1ncc2cc(-c3ccccc3)c(-c3ccc(CNCCc4c[nH]cn4)cc3)nc2n1	C26H24N6S	452.57	33	27	0.15	8	5	2	133.94	104.68	3.07	4.44	4.98	2.81	5.86	4.23	-5.52	0.00136	3.02e-06	Moderately soluble	-6.36	0.000199	4.4e-07	Poorly soluble	-10.98	4.73e-09	1.04e-11	Insoluble	High	No	Yes	No	Yes	Yes	Yes	Yes	-5.91	0	1	0	0	0	0.55	0	0	3	3.33
ZINC000028980016	CSc1ncc2cc(-c3ccccc3)c(-c3ccc(CNCCc4nc[nH]n4)cc3)nc2n1	C25H23N7S	453.56	33	27	0.16	8	6	2	131.74	117.57	3.04	4.36	4.38	2.61	5.29	3.94	-5.48	0.00151	3.34e-06	Moderately soluble	-6.54	0.000129	2.85e-07	Poorly soluble	-10.61	1.12e-08	2.47e-11	Insoluble	High	No	Yes	No	Yes	Yes	Yes	Yes	-5.97	0	1	0	0	0	0.55	0	0	3	3.34
ZINC000028980019	CSc1ncc2cc(-c3ccccc3)c(-c3ccc(CNCCc4nccs4)cc3)nc2n1	C26H23N5S2	469.62	33	27	0.15	8	5	1	137.47	117.13	3.95	5.33	5.72	3.21	6.97	5.04	-6.19	0.000305	6.5e-07	Poorly soluble	-7.54	1.35e-05	2.87e-08	Poorly soluble	-11.02	4.46e-09	9.51e-12	Insoluble	Low	No	Yes	No	Yes	Yes	Yes	Yes	-5.38	0	2	0	0	1	0.55	0	0	3	3.45
ZINC000028980022	CSc1ncc2cc(-c3ccccc3)c(-c3ccc(CNCCc4cccnc4)cc3)nc2n1	C28H25N5S	463.6	34	28	0.14	8	5	1	139.59	88.89	3.75	5.19	5.66	3.58	6.35	4.91	-6.07	0.000399	8.6e-07	Poorly soluble	-6.8	7.29e-05	1.57e-07	Poorly soluble	-11.76	8.07e-10	1.74e-12	Insoluble	High	No	Yes	No	Yes	Yes	Yes	Yes	-5.44	0	2	0	0	1	0.55	0	0	3	3.34
ZINC000028980026	CSc1ncc2cc(-c3ccccc3)c(-c3ccc(CNCCCn4ccnc4)cc3)nc2n1	C27H26N6S	466.6	34	27	0.19	9	5	1	138.68	93.82	3.59	4.38	5.31	3.01	5.21	4.3	-5.49	0.00152	3.27e-06	Moderately soluble	-6.07	0.0004	8.58e-07	Poorly soluble	-10.55	1.33e-08	2.84e-11	Insoluble	High	No	Yes	No	Yes	Yes	Yes	Yes	-6.04	0	1	0	0	0	0.55	0	0	3	3.39
ZINC000028980031	CSc1ncc2cc(-c3ccccc3)c(-c3ccc(CN(C)CCc4cn[nH]c4)cc3)nc2n1	C27H26N6S	466.6	34	27	0.19	8	5	1	138.84	95.89	3.64	5.02	5.33	3.41	5.81	4.64	-5.96	0.000517	1.11e-06	Moderately soluble	-6.77	7.85e-05	1.68e-07	Poorly soluble	-10.64	1.07e-08	2.3e-11	Insoluble	High	No	Yes	No	Yes	Yes	Yes	Yes	-5.58	0	1	0	0	1	0.55	0	0	3	3.37
ZINC000028980035	CSc1ncc2cc(-c3ccccc3)c(-c3ccc(CNCCc4n[nH]c(C)n4)cc3)nc2n1	C26H25N7S	467.59	34	27	0.19	8	6	2	136.7	117.57	2.89	4.76	4.69	3.22	5.81	4.28	-5.8	0.000745	1.59e-06	Moderately soluble	-6.96	5.13e-05	1.1e-07	Poorly soluble	-10.98	4.9e-09	1.05e-11	Insoluble	High	No	Yes	No	Yes	Yes	Yes	Yes	-5.77	0	1	0	0	0	0.55	0	0	3	3.49
ZINC000028980039	CSc1ncc2cc(-c3ccccc3)c(-c3ccc(CNCCc4n[nH]c(-c5ccccc5)n4)cc3)nc2n1	C31H27N7S	529.66	39	33	0.13	9	6	2	157.17	117.57	3.85	6.02	6.05	4.27	6.82	5.4	-6.95	5.96e-05	1.13e-07	Poorly soluble	-8.27	2.86e-06	5.41e-09	Poorly soluble	-13.04	4.83e-11	9.12e-14	Insoluble	Low	No	No	No	No	No	No	Yes	-5.26	2	3	0	1	1	0.17	0	0	3	3.88
ZINC000028980042	CSc1ncc2cc(-c3ccccc3)c(-c3ccc(CNCCc4nnc(N)s4)cc3)nc2n1	C25H23N7S2	485.63	34	27	0.16	8	6	2	139.67	156.04	3.58	4.39	4.7	2.88	5.68	4.25	-5.68	0.00102	2.11e-06	Moderately soluble	-7.38	2.01e-05	4.13e-08	Poorly soluble	-10.27	2.58e-08	5.32e-11	Insoluble	Low	No	Yes	No	Yes	Yes	Yes	Yes	-6.15	0	2	1	1	1	0.55	0	0	3	3.61
ZINC000028980046	CSc1ncc2cc(-c3ccccc3)c(-c3ccc(CNCCC(=O)c4ccccc4N)cc3)nc2n1	C30H27N5OS	505.63	37	28	0.13	9	5	2	151.43	119.09	3.76	5.49	5.88	3.35	6.15	4.93	-6.4	0.000201	3.98e-07	Poorly soluble	-7.75	9.01e-06	1.78e-08	Poorly soluble	-11.68	1.07e-09	2.11e-12	Insoluble	Low	No	No	No	Yes	No	Yes	Yes	-5.49	1	3	0	1	1	0.55	0	1	3	3.44
ZINC000028980049	CSc1ncc2cc(-c3ccccc3)c(-c3ccc(CN4CCC(C(N)=O)CC4)cc3)nc2n1	C27H27N5OS	469.6	34	22	0.26	6	5	1	141.34	110.3	3.6	4.14	4.25	3.11	4.69	3.96	-5.44	0.0017	3.61e-06	Moderately soluble	-6.16	0.000322	6.86e-07	Poorly soluble	-8.83	6.93e-07	1.48e-09	Poorly soluble	High	No	Yes	No	Yes	Yes	Yes	Yes	-6.23	0	1	0	0	0	0.55	0	0	2	3.76
ZINC000028980051	CCNC(=O)NC1CCN(Cc2ccc(-c3nc4nc(SC)ncc4cc3-c3ccccc3)cc2)CC1	C29H32N6OS	512.67	37	22	0.31	9	5	2	154.24	108.34	3.79	4.84	4.83	3.52	4.78	4.35	-5.91	0.000625	1.22e-06	Moderately soluble	-6.85	7.26e-05	1.42e-07	Poorly soluble	-10.04	4.71e-08	9.18e-11	Insoluble	High	No	Yes	No	Yes	Yes	Yes	Yes	-5.99	1	2	0	0	0	0.55	0	0	3	4.14
ZINC000028980055	CSc1ncc2cc(-c3ccccc3)c(-c3ccc(CN4CCC(C(=O)NCCC(N)=O)CC4)cc3)nc2n1	C30H32N6O2S	540.68	39	22	0.3	10	6	2	158.76	139.4	3.7	3.39	3.75	2.45	4.66	3.59	-5.09	0.00444	8.22e-06	Moderately soluble	-6	0.000545	1.01e-06	Moderately soluble	-9.56	1.49e-07	2.75e-10	Poorly soluble	Low	No	Yes	No	Yes	Yes	Yes	Yes	-7.19	1	3	0	1	0	0.55	0	0	2	4.19
ZINC000028980059	CSc1ncc2cc(-c3ccccc3)c(-c3ccc(CN4CCC(NC(=O)CNC(C)=O)CC4)cc3)nc2n1	C30H32N6O2S	540.68	39	22	0.3	10	6	2	158.86	125.41	4.22	3.99	3.76	2.45	4.73	3.83	-5.46	0.00186	3.44e-06	Moderately soluble	-6.33	0.000256	4.73e-07	Poorly soluble	-9.95	6.02e-08	1.11e-10	Poorly soluble	High	No	Yes	No	Yes	Yes	Yes	Yes	-6.77	1	3	0	0	0	0.55	0	0	3	4.16
ZINC000029037179	CSc1ncc2cc(-c3ccccc3)c(-c3ccc(CN4CCC(c5nnc(N)s5)CC4)cc3)nc2n1	C28H27N7S2	525.69	37	27	0.25	6	6	1	155.98	147.25	4.08	5.14	5.37	3.49	5.77	4.77	-6.48	0.000173	3.3e-07	Poorly soluble	-7.98	5.54e-06	1.05e-08	Poorly soluble	-9.86	7.26e-08	1.38e-10	Poorly soluble	Low	No	Yes	No	No	Yes	Yes	Yes	-5.86	1	2	1	1	1	0.55	0	0	2	4.35
ZINC000029037181	CSc1ncc2cc(-c3ccccc3)c(-c3ccc(CN4CCC(C(=O)Nc5ccncc5)CC4)cc3)nc2n1	C32H30N6OS	546.69	40	28	0.22	8	6	1	165.25	109.2	4.17	5.03	5.6	3.34	5.59	4.75	-6.39	0.000224	4.09e-07	Poorly soluble	-7.06	4.72e-05	8.63e-08	Poorly soluble	-11.3	2.76e-09	5.05e-12	Insoluble	Low	No	No	Yes	No	Yes	Yes	Yes	-6.06	1	3	0	0	1	0.55	0	0	3	4.13
ZINC000029037183	CSc1ncc2cc(-c3ccccc3)c(-c3ccc(CN4CCC(c5nc(-c6cccnc6)no5)CC4)cc3)nc2n1	C33H29N7OS	571.69	42	33	0.21	7	8	0	169.2	119.02	4.96	5.85	6.37	3.45	6.18	5.36	-7.19	3.7e-05	6.46e-08	Poorly soluble	-8.12	4.33e-06	7.57e-09	Poorly soluble	-12.25	3.21e-10	5.61e-13	Insoluble	Low	No	No	Yes	No	Yes	No	Yes	-5.63	1	4	0	1	1	0.55	0	0	2	4.79
ZINC000029037185	CSc1ncc2cc(-c3ccccc3)c(-c3ccc(CN4CCC(c5cc(-c6ccncc6)[nH]n5)CC4)cc3)nc2n1	C34H31N7S	569.72	42	33	0.21	7	6	1	173.49	108.78	4.12	5.93	6.71	3.75	6.89	5.48	-7.23	3.37e-05	5.92e-08	Poorly soluble	-7.99	5.84e-06	1.03e-08	Poorly soluble	-12.62	1.36e-10	2.38e-13	Insoluble	Low	No	No	Yes	No	No	No	Yes	-5.57	1	4	0	1	1	0.55	0	0	2	4.46
ZINC000029037187	CSc1ncc2cc(-c3ccccc3)c(-c3ccc(CN4CCC(c5n[nH]c(-c6ccccn6)n5)CC4)cc3)nc2n1	C33H30N8S	570.71	42	33	0.21	7	7	1	171.28	121.67	4.27	5.74	6.11	3.85	6.31	5.26	-7.11	4.39e-05	7.69e-08	Poorly soluble	-8.06	4.94e-06	8.66e-09	Poorly soluble	-12.25	3.22e-10	5.64e-13	Insoluble	Low	No	No	Yes	No	Yes	No	Yes	-5.71	1	4	0	1	1	0.55	0	0	2	4.63
ZINC000029037192	COc1ncc2cc(-c3ccccc3)c(-c3ccc(CN4CCC(c5n[nH]c(-c6ccccn6)n5)CC4)cc3)nc2n1	C33H30N8O	554.64	42	33	0.21	7	8	1	166.05	105.6	3.68	5.2	5.39	3.48	5.75	4.7	-6.67	0.000117	2.12e-07	Poorly soluble	-7.16	3.79e-05	6.84e-08	Poorly soluble	-11.9	7e-10	1.26e-12	Insoluble	High	No	No	Yes	No	Yes	No	Yes	-5.99	1	3	0	0	1	0.55	0	0	2	4.66
ZINC000029037194	N#Cc1ncc2cc(-c3ccccc3)c(-c3ccc(CN4CCC(c5n[nH]c(-c6ccccn6)n5)CC4)cc3)nc2n1	C33H27N9	549.63	42	33	0.18	6	8	1	164.28	120.16	3.94	4.94	5.26	2.74	5.73	4.52	-6.55	0.000157	2.85e-07	Poorly soluble	-7.2	3.46e-05	6.3e-08	Poorly soluble	-11.86	7.52e-10	1.37e-12	Insoluble	Low	No	No	Yes	No	Yes	No	No	-6.15	1	2	0	0	0	0.55	0	0	2	4.57
ZINC000029037196	NC(=O)c1ncc2cc(-c3ccccc3)c(-c3ccc(CN4CCC(c5n[nH]c(-c6ccccn6)n5)CC4)cc3)nc2n1	C33H29N9O	567.64	43	33	0.18	7	8	2	167.66	139.46	2.97	4.1	4.48	2.65	4.9	3.82	-6.05	0.000508	8.95e-07	Poorly soluble	-6.73	0.000105	1.84e-07	Poorly soluble	-11.35	2.56e-09	4.52e-12	Insoluble	Low	No	Yes	Yes	No	Yes	No	No	-6.85	1	3	0	1	0	0.55	0	0	2	4.6
ZINC000029037198	CNc1ncc2cc(-c3ccccc3)c(-c3ccc(CN4CCC(c5n[nH]c(-c6ccccn6)n5)CC4)cc3)nc2n1	C33H31N9	553.66	42	33	0.21	7	7	2	168.87	108.4	4.17	5.21	5.24	3.48	5.43	4.71	-6.67	0.000117	2.12e-07	Poorly soluble	-7.23	3.23e-05	5.83e-08	Poorly soluble	-12.21	3.4e-10	6.14e-13	Insoluble	High	No	No	Yes	No	Yes	No	Yes	-5.98	1	3	0	0	1	0.55	0	0	2	4.66
ZINC000029037303	Nc1ncnc2nc(-c3ccc(CN4CCC(c5nc6ccc(F)cc6[nH]5)CC4)cc3)c(-c3ccccc3)cc12	C32H28FN7	529.61	40	31	0.19	5	6	2	160.4	96.61	3.53	5.52	6.23	4.04	6.01	5.07	-6.84	7.57e-05	1.43e-07	Poorly soluble	-7.31	2.61e-05	4.92e-08	Poorly soluble	-11.63	1.25e-09	2.37e-12	Insoluble	Low	No	No	Yes	No	No	No	No	-5.61	1	3	0	1	1	0.55	0	0	2	4.33
ZINC000029037305	Nc1ncnc2nc(-c3ccc(CN4CCC(n5ncc6c(N)ncnc65)CC4)cc3)c(-c3ccccc3)cc12	C30H28N10	528.61	40	31	0.2	5	7	2	160.38	137.55	3.43	3.65	3.98	2.86	2.67	3.32	-5.66	0.00116	2.19e-06	Moderately soluble	-6.23	0.000313	5.92e-07	Poorly soluble	-9.42	2.01e-07	3.81e-10	Poorly soluble	Low	No	Yes	Yes	Yes	Yes	Yes	No	-6.93	1	2	0	1	0	0.55	0	0	2	4.24
ZINC000029037319	CSc1ncc2cc(-c3ccccc3)c(-c3ccc(CN4CCC(n5ncc6c(N)ncnc65)CC4)cc3)nc2n1	C31H29N9S	559.69	41	31	0.23	6	7	1	167.69	136.83	4.17	4.84	5.12	3.68	4.02	4.36	-6.52	0.000168	3e-07	Poorly soluble	-7.45	2e-05	3.57e-08	Poorly soluble	-10.24	3.24e-08	5.78e-11	Insoluble	Low	No	Yes	No	No	Yes	No	Yes	-6.28	1	2	0	1	0	0.55	0	0	2	4.34
ZINC000029047352	N#Cc1c[nH]c2ncnc(N3CC4(CCNCC4)c4ccccc43)c12	C19H18N6	330.39	25	15	0.32	1	4	2	102.55	80.63	2.23	2.29	1.84	1.92	2.74	2.2	-3.71	0.0646	0.000195	Soluble	-3.62	0.0791	0.000239	Soluble	-6.15	0.000233	7.05e-07	Poorly soluble	High	No	Yes	Yes	No	Yes	Yes	Yes	-6.69	0	0	0	0	0	0.55	0	0	0	3.27
ZINC000029047366	c1ccc(Cc2c[nH]c3ncnc(N4CC5(CCNCC5)c5ccccc54)c23)cc1	C25H25N5	395.5	30	21	0.28	3	3	2	127.29	56.84	3.07	4.49	3.56	3.89	4.62	3.93	-5.44	0.00143	3.62e-06	Moderately soluble	-5.4	0.00156	3.94e-06	Moderately soluble	-8.94	4.55e-07	1.15e-09	Poorly soluble	High	Yes	Yes	Yes	Yes	Yes	Yes	Yes	-5.52	0	0	0	0	0	0.55	0	0	2	3.74
ZINC000029047471	Cc1c[nH]c2ncnc(N3CC4(CCNCC4)c4ccccc43)c12	C19H21N5	319.4	24	15	0.37	1	3	2	102.8	56.84	2.61	2.94	2.28	2.81	3.25	2.78	-4.07	0.0272	8.53e-05	Moderately soluble	-3.8	0.0511	0.00016	Soluble	-6.46	0.000111	3.48e-07	Poorly soluble	High	Yes	Yes	Yes	No	Yes	Yes	Yes	-6.16	0	0	0	0	0	0.55	0	0	0	3.23
ZINC000029047475	CS(=O)(=O)N1CCC2(CC1)CN(c1ncnc3[nH]ccc13)c1ccc(F)cc12	C19H20FN5O2S	401.46	28	15	0.37	2	6	1	111.66	90.57	2.07	2.39	3.28	2.24	1.88	2.37	-4.1	0.032	7.96e-05	Moderately soluble	-3.93	0.0468	0.000117	Soluble	-5.89	0.000518	1.29e-06	Moderately soluble	High	No	Yes	No	No	Yes	Yes	Yes	-7.05	0	0	0	0	0	0.55	0	0	1	3.47
ZINC000029047478	Clc1c[nH]c2ncnc(N3CC4(CCNCC4)c4ccccc43)c12	C18H18ClN5	339.82	24	15	0.33	1	3	2	102.84	56.84	2.56	3.2	2.62	2.81	3.37	2.91	-4.36	0.0149	4.37e-05	Moderately soluble	-4.07	0.0292	8.6e-05	Moderately soluble	-6.67	7.18e-05	2.11e-07	Poorly soluble	High	Yes	Yes	Yes	No	Yes	Yes	Yes	-6.1	0	0	0	0	0	0.55	0	0	0	3.13
ZINC000029047487	CC(=O)N1CCC2(CC1)CN(c1ncnc3[nH]ccc13)c1ccc(F)cc12	C20H20FN5O	365.4	27	15	0.35	2	4	1	107.7	65.12	2.68	2.6	2.79	2.94	2.98	2.8	-4.02	0.0347	9.49e-05	Moderately soluble	-3.62	0.0883	0.000242	Soluble	-5.94	0.000418	1.14e-06	Moderately soluble	High	Yes	Yes	Yes	No	Yes	Yes	Yes	-6.68	0	0	0	0	0	0.55	0	0	1	3.29
ZINC000029047614	CN1CCC2(CC1)CN(c1ncnc3[nH]ccc13)c1ccccc12	C19H21N5	319.4	24	15	0.37	1	3	1	102.74	48.05	3	3.04	2.31	2.81	2.67	2.77	-4.13	0.0236	7.38e-05	Moderately soluble	-3.71	0.0616	0.000193	Soluble	-5.74	0.000577	1.81e-06	Moderately soluble	High	Yes	Yes	Yes	No	Yes	Yes	Yes	-6.09	0	0	0	0	0	0.55	0	0	0	3.18
ZINC000029047616	Clc1ccc2c(c1)C1(CCNCC1)CN2c1ncnc2[nH]ccc12	C18H18ClN5	339.82	24	15	0.33	1	3	2	102.84	56.84	2.54	3.2	2.62	2.81	3.37	2.91	-4.36	0.0149	4.37e-05	Moderately soluble	-4.07	0.0292	8.6e-05	Moderately soluble	-6.67	7.18e-05	2.11e-07	Poorly soluble	High	Yes	Yes	Yes	No	Yes	Yes	Yes	-6.1	0	0	0	0	0	0.55	0	0	0	3.12
ZINC000029047619	Fc1ccc2c(c1)C1(CCNCC1)CN2c1ncnc2[nH]ccc12	C18H18FN5	323.37	24	15	0.33	1	4	2	97.79	56.84	2.41	2.67	2.53	2.7	3.15	2.69	-3.92	0.0386	0.000119	Soluble	-3.52	0.0987	0.000305	Soluble	-6.35	0.000145	4.48e-07	Poorly soluble	High	Yes	Yes	Yes	No	Yes	Yes	Yes	-6.38	0	0	0	0	0	0.55	0	0	0	3.17
ZINC000029047627	c1ccc2c(c1)N(c1ncnc3[nH]ccc13)CC21CCNCC1	C18H19N5	305.38	23	15	0.33	1	3	2	97.83	56.84	2.55	2.57	1.97	2.58	2.75	2.48	-3.77	0.052	0.00017	Soluble	-3.41	0.118	0.000387	Soluble	-6.08	0.000255	8.34e-07	Poorly soluble	High	Yes	Yes	Yes	No	Yes	Yes	Yes	-6.34	0	0	0	0	0	0.55	0	0	0	3.07
ZINC000029047753	c1nc(N2CCc3nc[nH]c3C2)c2cc[nH]c2n1	C12H12N6	240.26	18	14	0.25	1	3	2	70.52	73.49	1.04	0.86	0.71	0.02	1.85	0.9	-2.38	0.999	0.00416	Soluble	-1.99	2.48	0.0103	Very soluble	-4.07	0.0206	8.57e-05	Moderately soluble	High	No	Yes	Yes	No	No	Yes	Yes	-7.16	0	0	0	0	0	0.55	0	0	1	2.48
ZINC000029047758	Cc1n[nH]c(-c2cc(Cl)ccc2Nc2ncnc3[nH]ccc23)n1	C15H12ClN7	325.76	23	20	0.07	3	4	3	88.79	95.17	1.8	3.29	3.45	2.19	3.27	2.8	-4.38	0.0136	4.19e-05	Moderately soluble	-4.96	0.00354	1.09e-05	Moderately soluble	-7.07	2.78e-05	8.53e-08	Poorly soluble	High	No	No	Yes	Yes	No	No	Yes	-5.95	0	0	0	0	0	0.55	0	0	0	2.7
ZINC000029047890	Clc1c[nH]c2ncnc(Nc3ccccc3-c3nc[nH]n3)c12	C14H10ClN7	311.73	22	20	0	3	4	3	83.82	95.17	1.19	2.89	3.14	1.27	2.78	2.25	-4.07	0.0266	8.55e-05	Moderately soluble	-4.55	0.00881	2.83e-05	Moderately soluble	-6.69	6.36e-05	2.04e-07	Poorly soluble	High	No	No	Yes	Yes	No	No	No	-6.15	0	0	0	0	0	0.55	0	0	0	2.55
ZINC000029047894	c1ccc(-c2nc[nH]n2)c(Nc2ncnc3[nH]ccc23)c1	C14H11N7	277.28	21	20	0	3	4	3	78.81	95.17	1.04	2.26	2.49	1.01	2.16	1.79	-3.49	0.0898	0.000324	Soluble	-3.89	0.0353	0.000127	Soluble	-6.09	0.000226	8.17e-07	Poorly soluble	High	No	No	Yes	Yes	No	No	No	-6.39	0	0	0	0	0	0.55	0	0	0	2.51
ZINC000029047899	Cc1c[nH]c2ncnc(Nc3ccccc3-c3nc[nH]n3)c12	C15H13N7	291.31	22	20	0.07	3	4	3	83.78	95.17	1.27	2.63	2.8	1.27	2.64	2.12	-3.78	0.0486	0.000167	Soluble	-4.28	0.0153	5.26e-05	Moderately soluble	-6.47	9.87e-05	3.39e-07	Poorly soluble	High	No	No	Yes	Yes	No	No	Yes	-6.21	0	0	0	0	0	0.55	0	0	0	2.64
ZINC000029048819	O=C1N=CC=C2N=C(c3ccc(CN4CCC(c5n[nH]c(-c6ccccn6)n5)CC4)cc3)C(c3ccccc3)=C[C@@H]12	C33H29N7O	539.63	41	23	0.21	6	7	1	170.74	99.49	3.78	3.66	3.95	3.08	6.08	4.11	-5.51	0.00167	3.09e-06	Moderately soluble	-5.44	0.00197	3.64e-06	Moderately soluble	-9.94	6.18e-08	1.15e-10	Poorly soluble	High	No	Yes	Yes	No	Yes	No	Yes	-6.99	1	2	0	0	0	0.55	0	0	2	5.52
ZINC000029048822	O=C1N=CC=C2N=C(c3ccc(CN4CCC(c5n[nH]c(-c6ccccn6)n5)CC4)cc3)C(c3ccccc3)=C[C@H]12	C33H29N7O	539.63	41	23	0.21	6	7	1	170.74	99.49	3.76	3.66	3.95	3.08	6.08	4.11	-5.51	0.00167	3.09e-06	Moderately soluble	-5.44	0.00197	3.64e-06	Moderately soluble	-9.94	6.18e-08	1.15e-10	Poorly soluble	High	No	Yes	Yes	No	Yes	No	Yes	-6.99	1	2	0	0	0	0.55	0	0	2	5.52
ZINC000029048909	c1ccc(-c2cc3ncccc3nc2-c2ccc(CN3CCC(c4n[nH]c(-c5ccccn5)n4)CC3)cc2)cc1	C33H29N7	523.63	40	33	0.18	6	6	1	161.77	83.48	4.12	5.3	5.99	3.56	6.26	5.05	-6.64	0.00012	2.29e-07	Poorly soluble	-6.8	8.22e-05	1.57e-07	Poorly soluble	-12.18	3.44e-10	6.58e-13	Insoluble	High	No	No	No	No	Yes	No	No	-5.73	1	3	0	1	1	0.55	0	0	2	4.45
ZINC000029048926	c1ccc(-c2cc3cnccc3nc2-c2ccc(CN3CCC(c4n[nH]c(-c5ccccn5)n4)CC3)cc2)cc1	C33H29N7	523.63	40	33	0.18	6	6	1	161.77	83.48	3.99	5.21	5.99	3.29	6.26	4.95	-6.58	0.000137	2.61e-07	Poorly soluble	-6.71	0.000102	1.95e-07	Poorly soluble	-12.18	3.44e-10	6.58e-13	Insoluble	High	No	No	No	No	Yes	No	No	-5.8	1	3	0	1	1	0.55	0	0	2	4.45
ZINC000029048929	c1ccc(-c2cc3ccncc3nc2-c2ccc(CN3CCC(c4n[nH]c(-c5ccccn5)n4)CC3)cc2)cc1	C33H29N7	523.63	40	33	0.18	6	6	1	161.77	83.48	4.15	5.21	5.99	3.29	6.26	4.98	-6.58	0.000137	2.61e-07	Poorly soluble	-6.71	0.000102	1.95e-07	Poorly soluble	-12.18	3.44e-10	6.58e-13	Insoluble	High	No	No	No	No	Yes	No	No	-5.8	1	3	0	1	1	0.55	0	0	2	4.46
ZINC000029049093	c1ccc(-c2cc3cccnc3nc2-c2ccc(CN3CCC(c4n[nH]c(-c5ccccn5)n4)CC3)cc2)cc1	C33H29N7	523.63	40	33	0.18	6	6	1	161.77	83.48	3.87	5.54	5.99	3.97	6.26	5.13	-6.79	8.47e-05	1.62e-07	Poorly soluble	-7.05	4.63e-05	8.85e-08	Poorly soluble	-12.18	3.44e-10	6.58e-13	Insoluble	High	No	No	No	No	Yes	No	No	-5.56	1	3	0	1	1	0.55	0	0	2	4.46
ZINC000029049101	c1ccc(-c2cc(C3CCN(Cc4ccc(-c5nc6ncccc6cc5-c5ccccc5)cc4)CC3)n[nH]2)cc1	C35H31N5	521.65	40	33	0.17	6	4	1	166.18	57.7	4.1	6.8	7.2	4.87	7.42	6.08	-7.57	1.4e-05	2.67e-08	Poorly soluble	-7.82	7.91e-06	1.52e-08	Poorly soluble	-12.93	6.14e-11	1.18e-13	Insoluble	Low	No	No	No	No	No	No	No	-4.65	2	4	0	1	1	0.17	0	0	2	4.32
ZINC000029049245	c1ccc(-c2cc3cccnc3nc2-c2ccc(CN3CCC(c4cc(-c5ccccn5)[nH]n4)CC3)cc2)cc1	C34H30N6	522.64	40	33	0.18	6	5	1	163.97	70.59	3.86	5.77	6.6	3.87	6.84	5.39	-6.93	6.14e-05	1.17e-07	Poorly soluble	-7.02	4.98e-05	9.53e-08	Poorly soluble	-12.55	1.46e-10	2.79e-13	Insoluble	High	No	No	No	No	No	No	No	-5.39	1	3	0	1	1	0.55	0	0	2	4.35
ZINC000029049249	O=c1ccc(-c2cc(C3CCN(Cc4ccc(-c5nc6ncccc6cc5-c5ccccc5)cc4)CC3)n[nH]2)c[nH]1	C34H30N6O	538.64	41	33	0.18	6	5	2	166.8	90.56	3.67	4.64	5.89	3.82	6.98	5	-6.3	0.000268	4.98e-07	Poorly soluble	-6.27	0.000291	5.4e-07	Poorly soluble	-12.44	1.94e-10	3.61e-13	Insoluble	High	No	No	Yes	No	Yes	No	No	-6.29	1	4	0	1	0	0.55	0	0	2	4.46
ZINC000029049254	c1ccc(-c2cc3cccnc3nc2-c2ccc(CN3CCC(c4cc(-c5cccnc5)[nH]n4)CC3)cc2)cc1	C34H30N6	522.64	40	33	0.18	6	5	1	163.97	70.59	3.7	5.73	6.6	3.87	6.84	5.35	-6.9	6.51e-05	1.25e-07	Poorly soluble	-6.98	5.48e-05	1.05e-07	Poorly soluble	-12.55	1.46e-10	2.79e-13	Insoluble	High	No	No	No	No	No	No	No	-5.42	1	3	0	1	1	0.55	0	0	2	4.34
ZINC000029049369	c1ccc(-c2cc3cccnc3nc2-c2ccc(CN3CCC(c4cc(-c5ccncc5)[nH]n4)CC3)cc2)cc1	C34H30N6	522.64	40	33	0.18	6	5	1	163.97	70.59	3.87	5.73	6.6	3.87	6.84	5.38	-6.9	6.51e-05	1.25e-07	Poorly soluble	-6.98	5.48e-05	1.05e-07	Poorly soluble	-12.55	1.46e-10	2.79e-13	Insoluble	High	No	No	No	No	No	No	No	-5.42	1	3	0	1	1	0.55	0	0	2	4.28
ZINC000029049378	c1ccc(-c2nc3ccccc3nc2-c2ccc(CN3CCC(c4cc(-c5ccncc5)[nH]n4)CC3)cc2)cc1	C34H30N6	522.64	40	33	0.18	6	5	1	163.97	70.59	4.21	5.53	6.6	3.47	6.84	5.33	-6.78	8.7e-05	1.66e-07	Poorly soluble	-6.77	8.83e-05	1.69e-07	Poorly soluble	-12.55	1.46e-10	2.79e-13	Insoluble	High	No	No	Yes	No	No	No	No	-5.56	1	3	0	1	1	0.55	0	0	2	4.28
ZINC000029049547	CCN(CC)CCNC(=O)c1ccc2nc(-c3ccccc3)c(-c3ccc(CN4CCC(n5c(=O)[nH]c6ccccc65)CC4)cc3)nc2c1	C40H43N7O2	653.82	49	31	0.3	12	6	2	200.93	99.15	5.66	5.49	5.98	3.67	6.5	5.46	-7.03	6.12e-05	9.36e-08	Poorly soluble	-7.33	3.06e-05	4.67e-08	Poorly soluble	-12.73	1.23e-10	1.87e-13	Insoluble	Low	No	No	Yes	Yes	No	No	Yes	-6.39	1	4	1	1	2	0.55	0	0	3	5.1
ZINC000029126777	Cc1nc2ccccc2n1C1CCN(Cc2ccc(-c3nc4ncnc(N)c4cc3-c3ccccc3)cc2)CC1	C33H31N7	525.65	40	31	0.21	5	5	1	165.35	85.75	3.76	5.65	5.91	3.86	5.08	4.85	-6.9	6.59e-05	1.25e-07	Poorly soluble	-7.21	3.2e-05	6.1e-08	Poorly soluble	-10.91	6.41e-09	1.22e-11	Insoluble	High	No	No	No	No	No	No	No	-5.49	1	4	0	1	1	0.55	0	0	2	4.31
ZINC000029126780	Nc1ncnc2nc(-c3ccc(CN4CCC(n5cnc6c(N)ncnc65)CC4)cc3)c(-c3ccccc3)cc12	C30H28N10	528.61	40	31	0.2	5	7	2	160.38	137.55	3.45	3.52	3.98	2.04	2.67	3.13	-5.58	0.0014	2.64e-06	Moderately soluble	-6.09	0.000427	8.08e-07	Poorly soluble	-9.42	2.01e-07	3.81e-10	Poorly soluble	Low	No	Yes	No	Yes	Yes	Yes	Yes	-7.03	1	2	0	1	0	0.55	0	0	2	4.18
ZINC000029126829	Nc1nc(O)nc2nc(-c3ccc(CN4CCC(n5c(=O)[nH]c6ccccc65)CC4)cc3)c(-c3ccccc3)cc12	C32H29N7O2	543.62	41	31	0.19	5	6	3	165.23	125.95	3.12	4.63	4.6	3.53	4.21	4.02	-6.36	0.000239	4.4e-07	Poorly soluble	-7	5.43e-05	9.98e-08	Poorly soluble	-9.84	7.91e-08	1.46e-10	Poorly soluble	Low	No	Yes	Yes	Yes	Yes	No	No	-6.33	1	2	0	0	0	0.55	0	0	2	4.37
ZINC000029126830	Nc1ncnc2nc(-c3ccc(CN4CCC(n5c(=O)[nH]c6ccccc65)CC4)cc3)c(-c3ccccc3)cc12	C32H29N7O	527.62	40	31	0.19	5	5	2	163.21	105.72	3.63	4.65	4.9	3.64	4.69	4.3	-6.28	0.000274	5.2e-07	Poorly soluble	-6.6	0.000134	2.53e-07	Poorly soluble	-10.43	1.96e-08	3.71e-11	Insoluble	High	No	No	Yes	Yes	Yes	No	No	-6.22	1	2	0	0	0	0.55	0	0	2	4.25
ZINC000029126872	Nc1nn(CCO)c2nc(-c3ccc(CN4CCC(n5c(=O)[nH]c6ccccc65)CC4)cc3)c(-c3ccccc3)cc12	C33H33N7O2	559.66	42	30	0.24	7	5	3	170.63	117.99	3.91	3.93	4.3	3.48	4.05	3.93	-5.85	0.000786	1.4e-06	Moderately soluble	-6.11	0.000437	7.81e-07	Poorly soluble	-9.38	2.31e-07	4.13e-10	Poorly soluble	High	No	Yes	Yes	Yes	Yes	Yes	No	-6.92	1	3	0	0	0	0.55	0	0	2	4.71
ZINC000029126873	Nc1nn(CCc2c[nH]cn2)c2nc(-c3ccc(CN4CCC(n5c(=O)[nH]c6ccccc65)CC4)cc3)c(-c3ccccc3)cc12	C36H35N9O	609.72	46	35	0.22	8	5	3	186.1	126.44	3.74	4.75	5.27	3.5	4.98	4.45	-6.65	0.000137	2.25e-07	Poorly soluble	-7.14	4.46e-05	7.32e-08	Poorly soluble	-11.25	3.44e-09	5.64e-12	Insoluble	Low	No	No	Yes	Yes	Yes	No	No	-6.65	1	3	0	0	2	0.55	0	0	3	5.02
ZINC000029126917	Cn1nc(N)c2cc(-c3ccccc3)c(-c3ccc(CN4CCC(n5c(=O)[nH]c6ccccc65)CC4)cc3)nc21	C32H31N7O	529.63	40	30	0.22	5	4	2	164.66	97.76	3.58	4.68	4.84	4.34	4.26	4.34	-6.3	0.000267	5.05e-07	Poorly soluble	-6.46	0.000183	3.46e-07	Poorly soluble	-9.57	1.41e-07	2.67e-10	Poorly soluble	High	No	Yes	No	Yes	Yes	No	No	-6.21	2	3	0	0	0	0.17	0	0	2	4.48
ZINC000029126919	Nc1n[nH]c2nc(-c3ccc(CN4CCC(n5c(=O)[nH]c6ccccc65)CC4)cc3)c(-c3ccccc3)cc12	C31H29N7O	515.61	39	30	0.19	5	4	3	159.76	108.62	3.08	4.67	4.83	3.89	4.77	4.25	-6.22	0.000312	6.05e-07	Poorly soluble	-6.68	0.000108	2.1e-07	Poorly soluble	-10.03	4.83e-08	9.38e-11	Insoluble	High	No	Yes	Yes	Yes	Yes	No	No	-6.13	1	2	0	0	0	0.55	0	0	2	4.3
ZINC000029126920	COc1nc(-c2ccc(CN3CCC(n4c(=O)[nH]c5ccccc54)CC3)cc2)c(-c2ccccc2)cc1C#N	C32H29N5O2	515.6	39	27	0.22	6	5	1	156.91	86.94	4.34	5.07	5.24	3.44	5.68	4.75	-6.35	0.000232	4.5e-07	Poorly soluble	-6.64	0.000119	2.3e-07	Poorly soluble	-10.09	4.22e-08	8.18e-11	Insoluble	High	No	No	No	No	Yes	Yes	Yes	-5.85	1	2	0	0	1	0.55	0	0	2	4.31
ZINC000029126965	CN(C)c1nc(-c2ccc(CN3CCC(n4c(=O)[nH]c5ccccc54)CC3)cc2)c(-c2ccccc2)cc1C#N	C33H32N6O	528.65	40	27	0.24	6	4	1	164.63	80.95	4.46	5.23	5.3	3.63	5.32	4.79	-6.52	0.000161	3.05e-07	Poorly soluble	-6.68	0.000111	2.1e-07	Poorly soluble	-10.05	4.66e-08	8.81e-11	Insoluble	High	No	No	No	Yes	Yes	Yes	Yes	-5.81	1	3	0	0	1	0.55	0	0	2	4.44
ZINC000029126966	CNc1nc(-c2ccc(CN3CCC(n4c(=O)[nH]c5ccccc54)CC3)cc2)c(-c2ccccc2)cc1C#N	C32H30N6O	514.62	39	27	0.22	6	4	2	159.73	89.74	4.12	5.64	5.09	3.44	5.36	4.73	-6.7	0.000103	1.99e-07	Poorly soluble	-7.29	2.65e-05	5.15e-08	Poorly soluble	-10.4	2.05e-08	3.98e-11	Insoluble	High	No	No	No	Yes	Yes	Yes	Yes	-5.43	1	2	0	0	1	0.55	0	0	2	4.32
ZINC000029127013	N#Cc1cc(-c2ccccc2)c(-c2ccc(CN3CCC(n4c(=O)[nH]c5ccccc54)CC3)cc2)nc1N	C31H28N6O	500.59	38	27	0.19	5	4	2	154.83	103.73	3.68	4.97	4.82	3.26	4.89	4.32	-6.27	0.000268	5.36e-07	Poorly soluble	-6.89	6.5e-05	1.3e-07	Poorly soluble	-9.62	1.21e-07	2.41e-10	Poorly soluble	High	No	No	No	Yes	Yes	Yes	No	-5.82	1	2	0	0	0	0.55	0	0	2	4.17
ZINC000029127015	N#Cc1cc(-c2ccccc2)c(-c2ccc(CN3CCC(n4c(=O)[nH]c5ccccc54)CC3)cc2)nc1Cl	C31H26ClN5O	520.02	38	27	0.19	5	4	1	155.43	77.71	4.17	5.73	5.89	3.84	6.25	5.17	-6.87	7.02e-05	1.35e-07	Poorly soluble	-7.13	3.86e-05	7.43e-08	Poorly soluble	-10.57	1.4e-08	2.69e-11	Insoluble	High	No	No	No	No	Yes	No	No	-5.4	1	3	0	1	1	0.55	0	1	2	4.2
ZINC000029127351	Cn1c(=O)n(-c2ccc(C(C)(C)C#N)cc2)c2c3cc(C#Cc4cccnc4)ccc3ncc21	C28H21N5O	443.5	34	25	0.14	2	4	0	133.33	76.5	3.64	4.29	4.55	3.31	4.82	4.12	-5.7	0.000876	1.97e-06	Moderately soluble	-5.61	0.00109	2.46e-06	Moderately soluble	-8.39	1.79e-06	4.05e-09	Poorly soluble	High	No	Yes	No	No	Yes	No	No	-5.96	0	1	0	0	0	0.55	0	1	2	3.36
ZINC000029127404	C[C@@H](C#N)c1ccc(-n2cnc3cnc4ccc(C#Cc5cccnc5)cc4c32)cc1	C26H17N5	399.45	31	25	0.08	2	4	0	120.92	67.39	3.24	4.54	5.08	2.97	4.95	4.16	-5.64	0.000912	2.28e-06	Moderately soluble	-5.68	0.000839	2.1e-06	Moderately soluble	-8.58	1.06e-06	2.65e-09	Poorly soluble	High	No	Yes	Yes	Yes	Yes	No	Yes	-5.51	0	0	0	0	0	0.55	0	1	2	3.41
ZINC000029127405	C[C@H](C#N)c1ccc(-n2cnc3cnc4ccc(C#Cc5cccnc5)cc4c32)cc1	C26H17N5	399.45	31	25	0.08	2	4	0	120.92	67.39	3.28	4.54	5.08	2.97	4.95	4.16	-5.64	0.000912	2.28e-06	Moderately soluble	-5.68	0.000839	2.1e-06	Moderately soluble	-8.58	1.06e-06	2.65e-09	Poorly soluble	High	No	Yes	Yes	Yes	Yes	No	Yes	-5.51	0	0	0	0	0	0.55	0	1	2	3.41
ZINC000029127406	Cc1nc2cnc3ccc(C#Cc4cccnc4)cc3c2n1-c1ccc([C@@H](C)C#N)cc1	C27H19N5	413.47	32	25	0.11	2	4	0	125.88	67.39	3.29	4.94	5.38	3.17	5.47	4.45	-5.96	0.000451	1.09e-06	Moderately soluble	-6.09	0.000334	8.08e-07	Poorly soluble	-8.95	4.62e-07	1.12e-09	Poorly soluble	High	No	Yes	Yes	Yes	Yes	No	No	-5.31	0	0	0	0	0	0.55	0	1	2	3.61
ZINC000029127407	Cc1nc2cnc3ccc(C#Cc4cccnc4)cc3c2n1-c1ccc([C@H](C)C#N)cc1	C27H19N5	413.47	32	25	0.11	2	4	0	125.88	67.39	3.72	4.94	5.38	3.17	5.47	4.54	-5.96	0.000451	1.09e-06	Moderately soluble	-6.09	0.000334	8.08e-07	Poorly soluble	-8.95	4.62e-07	1.12e-09	Poorly soluble	High	No	Yes	Yes	Yes	Yes	No	No	-5.31	0	0	0	0	0	0.55	0	1	2	3.61
ZINC000029127408	Cc1nc2cnc3ccc(C#Cc4cccnc4)cc3c2n1-c1ccc(CC#N)cc1	C26H17N5	399.45	31	25	0.08	2	4	0	121.08	67.39	3.14	4.37	4.82	2.97	5.25	4.11	-5.53	0.00117	2.92e-06	Moderately soluble	-5.5	0.00126	3.15e-06	Moderately soluble	-8.93	4.65e-07	1.16e-09	Poorly soluble	High	Yes	Yes	Yes	Yes	Yes	No	Yes	-5.63	0	0	0	0	0	0.55	0	1	2	3.05
ZINC000029127409	CCc1nc2cnc3ccc(C#Cc4cccnc4)cc3c2n1-c1ccc(CC#N)cc1	C27H19N5	413.47	32	25	0.11	3	4	0	125.88	67.39	3.47	4.8	5.08	3.17	5.64	4.43	-5.81	0.000644	1.56e-06	Moderately soluble	-5.95	0.000467	1.13e-06	Moderately soluble	-9.33	1.95e-07	4.72e-10	Poorly soluble	High	No	Yes	Yes	Yes	Yes	No	Yes	-5.41	0	0	0	0	0	0.55	0	1	2	3.23
ZINC000029127462	N#CCc1ccc(-n2cnc3cnc4ccc(C#Cc5cccnc5)cc4c32)cc1	C25H15N5	385.42	30	25	0.04	2	4	0	116.11	67.39	3.18	3.97	4.51	2.77	4.72	3.83	-5.22	0.00235	6.09e-06	Moderately soluble	-5.09	0.00316	8.2e-06	Moderately soluble	-8.56	1.07e-06	2.77e-09	Poorly soluble	High	Yes	Yes	Yes	Yes	Yes	No	Yes	-5.83	0	0	0	0	0	0.55	0	1	2	2.85
ZINC000029127530	Nc1ncnc2nc(-c3ccc(CN4CCC(c5cc(-c6ccncc6)[nH]n5)CC4)cc3)c(-c3ccccc3)cc12	C33H30N8	538.64	41	33	0.18	6	6	2	166.17	109.5	3.4	4.74	5.58	3.18	5.54	4.49	-6.37	0.000232	4.31e-07	Poorly soluble	-6.77	9.16e-05	1.7e-07	Poorly soluble	-11.8	8.44e-10	1.57e-12	Insoluble	Low	No	No	Yes	No	No	No	No	-6.22	1	3	0	0	0	0.55	0	0	2	4.4
ZINC000033340364	CN1C/C(=C\c2ccccn2)C(=O)/C(=C/c2ccccn2)C1	C18H17N3O	291.35	22	12	0.17	2	4	0	90.67	46.09	2.54	1.57	1.86	1.04	3.26	2.06	-2.91	0.361	0.00124	Soluble	-2.15	2.07	0.00711	Soluble	-5.22	0.00174	5.98e-06	Moderately soluble	High	Yes	No	Yes	Yes	No	No	Yes	-6.96	0	0	0	0	0	0.55	1	1	0	2.88
ZINC000034009101	O=C1/C(=C/c2ccccc2F)CNC/C1=C\c1ccccc1F	C19H15F2NO	311.33	23	12	0.11	2	4	1	90.09	29.1	3.11	3.37	3.85	3.77	5.28	3.87	-4.15	0.0222	7.12e-05	Moderately soluble	-3.66	0.0682	0.000219	Soluble	-6.84	4.45e-05	1.43e-07	Poorly soluble	High	Yes	No	Yes	Yes	No	Yes	No	-5.81	0	0	0	0	0	0.55	1	1	0	2.76
ZINC000034271907	N[C@H](COc1cncc(-c2ccc3[nH]nc(-c4nccs4)c3c2)c1)Cc1c[nH]c2ccccc12	C26H22N6OS	466.56	34	29	0.12	7	5	3	135.59	133.74	2.82	4.02	5.18	1.77	6.25	4.01	-5.43	0.00172	3.68e-06	Moderately soluble	-6.53	0.000137	2.94e-07	Poorly soluble	-9.97	5e-08	1.07e-10	Poorly soluble	Low	No	Yes	No	No	Yes	Yes	Yes	-6.29	0	1	0	1	0	0.55	0	0	2	4.11
ZINC000034285194	CCn1c(-c2nonc2N)nc2c(C#CC(C)(C)O)nc(OC[C@H](N)Cc3ccccc3)cc21	C24H27N7O3	461.52	34	20	0.33	7	8	3	128.15	151.13	4.31	1.37	2.24	1.59	2.38	2.38	-3.54	0.134	0.00029	Soluble	-4.15	0.0329	7.14e-05	Moderately soluble	-6.08	0.00038	8.24e-07	Poorly soluble	Low	No	Yes	Yes	No	No	No	Yes	-8.14	0	0	1	1	1	0.55	0	1	1	4.68
ZINC000034285211	CCn1c(-c2nonc2N)nc2c(C#CC(C)(C)O)ncc(OC[C@H]3CCCNC3)c21	C21H27N7O3	425.48	31	14	0.52	5	8	3	119.98	137.14	3.68	0.27	1.29	0.76	1.73	1.55	-2.65	0.948	0.00223	Soluble	-2.71	0.827	0.00194	Soluble	-4.72	0.00816	1.92e-05	Moderately soluble	High	No	Yes	Yes	No	No	No	No	-8.7	0	0	0	1	0	0.55	0	1	1	4.57
ZINC000034285213	CCn1c(-c2nonc2N)nc2c(C#CC(C)(C)O)nc(O[C@@H](CCN)c3ccccc3)cc21	C24H27N7O3	461.52	34	20	0.33	7	8	3	128.15	151.13	3.67	1.23	2.44	1.59	2.38	2.26	-3.45	0.164	0.000355	Soluble	-4	0.046	9.97e-05	Moderately soluble	-6.08	0.00038	8.24e-07	Poorly soluble	Low	No	Yes	No	No	No	No	No	-8.24	0	0	1	1	1	0.55	0	1	1	4.71
ZINC000034323559	CCc1n[nH]c2ccc(-c3cncc(OC[C@@H](N)Cc4c[nH]c5ccccc45)c3)cc12	C25H25N5O	411.5	31	24	0.2	7	4	3	124.25	92.61	2.71	4.12	4.62	2.26	5.56	3.86	-5.1	0.00329	7.98e-06	Moderately soluble	-5.77	0.000697	1.69e-06	Moderately soluble	-9.4	1.63e-07	3.96e-10	Poorly soluble	High	No	Yes	No	Yes	Yes	Yes	Yes	-5.88	0	0	0	0	0	0.55	0	0	2	3.82
ZINC000034324287	N[C@H](COc1cncc(-c2ccc3[nH]nc(-c4ccc[nH]4)c3c2)c1)Cc1c[nH]c2ccccc12	C27H24N6O	448.52	34	29	0.11	7	4	4	134.27	108.4	2.48	3.78	5.05	1.7	5.7	3.74	-5.17	0.00302	6.74e-06	Moderately soluble	-5.75	0.000797	1.78e-06	Moderately soluble	-10.3	2.24e-08	4.99e-11	Insoluble	High	No	Yes	No	Yes	Yes	Yes	Yes	-6.35	0	1	0	0	0	0.55	0	0	2	4
ZINC000034377158	N[C@H](COc1cncc(-c2ccc3[nH]nc(-c4cccs4)c3c2)c1)Cc1c[nH]c2ccccc12	C27H23N5OS	465.57	34	29	0.11	7	4	3	137.79	120.85	2.78	4.67	5.78	2.5	6.82	4.51	-5.84	0.000676	1.45e-06	Moderately soluble	-6.94	5.41e-05	1.16e-07	Poorly soluble	-10.34	2.11e-08	4.54e-11	Insoluble	Low	No	Yes	No	No	Yes	Yes	Yes	-5.82	0	2	0	0	0	0.55	0	0	2	4.09
ZINC000034555102	O=C1C[C@@H](O)[C@@H](C2=CC(=O)c3ccccc3C2=O)O1	C14H10O5	258.23	19	6	0.21	1	5	1	63.8	80.67	1.37	0.27	0.67	0.19	1.84	0.87	-1.78	4.3	0.0166	Very soluble	-1.53	7.7	0.0298	Very soluble	-2.74	0.469	0.00182	Soluble	High	No	No	No	No	No	No	No	-7.68	0	0	0	0	0	0.55	1	0	0	3.67
ZINC000034630436	N[C@H](CNc1nnc(-c2ccc3[nH]ncc3c2)s1)Cc1cccc(C(F)(F)F)c1	C19H17F3N6S	418.44	29	20	0.21	7	7	3	106.11	120.75	2.57	3.94	5.04	2.96	4.94	3.89	-4.96	0.00454	1.08e-05	Moderately soluble	-6.18	0.000279	6.68e-07	Poorly soluble	-7.81	6.45e-06	1.54e-08	Poorly soluble	Low	No	Yes	Yes	Yes	Yes	Yes	Yes	-6.06	0	0	0	0	0	0.55	0	0	2	3.79
ZINC000034630766	Cc1n[nH]c2ccc(-c3nnc(NC[C@@H](N)Cc4cccc(C(F)(F)F)c4)s3)cc12	C20H19F3N6S	432.47	30	20	0.25	7	7	3	111.08	120.75	2.71	4.34	5.35	3.19	5.46	4.21	-5.29	0.00223	5.17e-06	Moderately soluble	-6.59	0.000111	2.57e-07	Poorly soluble	-8.19	2.82e-06	6.52e-09	Poorly soluble	Low	No	Yes	Yes	Yes	Yes	Yes	Yes	-5.86	0	0	0	0	0	0.55	0	0	2	3.9
ZINC000034803753	c1ccc2c(C[C@@H](COc3cncc(-c4ccc5nonc5c4)c3)Nc3ccc4nonc4c3)c[nH]c2c1	C28H21N7O3	503.51	38	33	0.11	8	8	2	141.67	127.78	3.51	4.79	5.21	2.91	4.65	4.21	-6.09	0.000405	8.05e-07	Poorly soluble	-7.21	3.14e-05	6.24e-08	Poorly soluble	-11.22	3.04e-09	6.04e-12	Insoluble	Low	No	Yes	No	No	Yes	No	No	-5.97	1	2	0	0	0	0.55	0	0	3	4.12
ZINC000034803757	CC(C)(C[C@@H]1CCCN1)[C@@H]1C(=O)Nc2ccc(-c3cncc(OC[C@@H](N)Cc4c[nH]c5ccccc45)c3)cc21	C32H37N5O2	523.67	39	21	0.38	9	5	4	162.92	105.06	3.38	4.21	4.43	2.5	5.87	4.08	-5.54	0.0015	2.86e-06	Moderately soluble	-6.13	0.000392	7.48e-07	Poorly soluble	-10.4	2.1e-08	4.01e-11	Insoluble	High	No	Yes	No	Yes	No	No	Yes	-6.51	1	3	0	0	0	0.55	0	0	3	5.05
ZINC000034803761	CC(C)(C[C@H]1CCCN1)[C@@H]1C(=O)Nc2ccc(-c3cncc(OC[C@@H](N)Cc4c[nH]c5ccccc45)c3)cc21	C32H37N5O2	523.67	39	21	0.38	9	5	4	162.92	105.06	3.71	4.21	4.43	2.5	5.87	4.14	-5.54	0.0015	2.86e-06	Moderately soluble	-6.13	0.000392	7.48e-07	Poorly soluble	-10.4	2.1e-08	4.01e-11	Insoluble	High	No	Yes	No	Yes	No	No	Yes	-6.51	1	3	0	0	0	0.55	0	0	3	5.05
ZINC000034803773	CC(C)(Cc1ncc[nH]1)[C@H]1C(=O)Nc2ccc(-c3cncc(OC[C@@H](N)Cc4c[nH]c5ccccc45)c3)cc21	C31H32N6O2	520.62	39	26	0.26	9	5	4	155.72	121.71	2.59	3.86	4.63	1.76	5.9	3.75	-5.4	0.00208	3.99e-06	Moderately soluble	-6.11	0.000402	7.72e-07	Poorly soluble	-10.83	7.77e-09	1.49e-11	Insoluble	Low	No	Yes	Yes	Yes	Yes	No	Yes	-6.74	1	3	0	0	0	0.55	0	0	3	4.7
ZINC000034803781	CC(C)(Cc1cccs1)[C@@H]1C(=O)Nc2ccc(-c3cncc(OC[C@@H](N)Cc4c[nH]c5ccccc45)c3)cc21	C32H32N4O2S	536.69	39	26	0.25	9	4	3	161.45	121.27	3.36	5.4	5.97	3.13	7.59	5.09	-6.47	0.000182	3.4e-07	Poorly soluble	-7.7	1.07e-05	1.99e-08	Poorly soluble	-11.24	3.1e-09	5.78e-12	Insoluble	Low	No	No	Yes	Yes	Yes	Yes	Yes	-5.74	1	4	0	1	1	0.55	0	0	3	4.79
ZINC000034803789	CC(C)(Cc1ccco1)[C@H]1C(=O)Nc2ccc(-c3cncc(OC[C@@H](N)Cc4c[nH]c5ccccc45)c3)cc21	C32H32N4O3	520.62	39	26	0.25	9	5	3	155.84	106.17	3.81	4.79	5.5	2.33	6.34	4.55	-5.98	0.000539	1.04e-06	Moderately soluble	-6.75	9.23e-05	1.77e-07	Poorly soluble	-11.2	3.27e-09	6.28e-12	Insoluble	Low	No	Yes	Yes	Yes	No	Yes	Yes	-6.07	1	3	0	0	0	0.55	0	0	3	4.79
ZINC000034803793	O=c1[nH]c2ccc(N[C@H](COc3cncc(-c4ccc5[nH]c(=O)sc5c4)c3)Cc3c[nH]c4ccccc34)cc2s1	C30H23N5O3S2	565.67	40	33	0.1	8	4	4	162.96	172.14	2.52	5.79	5.95	3.09	8.59	5.19	-7.08	4.73e-05	8.37e-08	Poorly soluble	-9.17	3.79e-07	6.69e-10	Poorly soluble	-11.81	8.68e-10	1.53e-12	Insoluble	Low	No	No	No	No	Yes	No	Yes	-5.64	1	3	1	2	2	0.55	0	0	3	4.31
ZINC000034803797	CC(C)(Cc1ccccc1)[C@@H]1C(=O)Nc2ccc(-c3cncc(OC[C@@H](N)Cc4c[nH]c5ccccc45)c3)cc21	C34H34N4O2	530.66	40	27	0.24	9	4	3	163.58	93.03	3.61	5.69	5.91	3.46	6.97	5.13	-6.62	0.000127	2.4e-07	Poorly soluble	-7.41	2.07e-05	3.9e-08	Poorly soluble	-11.98	5.61e-10	1.06e-12	Insoluble	High	No	No	Yes	Yes	No	Yes	Yes	-5.5	1	4	0	1	1	0.55	0	0	3	4.79
ZINC000034803805	CC(C)(Cc1cc[nH]c1)[C@@H]1C(=O)Nc2ccc(-c3cncc(OC[C@@H](N)Cc4c[nH]c5ccccc45)c3)cc21	C32H33N5O2	519.64	39	26	0.25	9	4	4	157.93	108.82	3.41	4.48	5.24	2.33	6.47	4.39	-5.78	0.000855	1.65e-06	Moderately soluble	-6.49	0.00017	3.27e-07	Poorly soluble	-11.2	3.29e-09	6.32e-12	Insoluble	High	No	Yes	Yes	Yes	No	No	Yes	-6.29	1	3	0	0	0	0.55	0	0	3	4.72
ZINC000034803810	CC(C)(Cc1c[nH]c2ccccc12)[C@@H]1C(=O)Nc2ccc(-c3cncc(OC[C@@H](N)Cc4c[nH]c5ccccc45)c3)cc21	C36H35N5O2	569.7	43	30	0.22	9	4	4	175.43	108.82	3.45	5.81	6.39	3.16	7.49	5.26	-6.95	6.32e-05	1.11e-07	Poorly soluble	-7.87	7.77e-06	1.36e-08	Poorly soluble	-12.81	8.76e-11	1.54e-13	Insoluble	Low	No	No	Yes	No	No	No	Yes	-5.65	1	4	0	1	1	0.55	0	0	3	4.96
ZINC000034803816	CC1(C)C(=O)Nc2ccc(N[C@H](COc3cncc(-c4ccc5c(c4)C(C)(C)C(=O)N5)c3)Cc3c[nH]c4ccccc34)cc21	C36H35N5O3	585.69	44	27	0.25	8	4	4	180.53	108.14	3.61	5.84	5.46	3.11	7.16	5.03	-7.08	4.91e-05	8.38e-08	Poorly soluble	-7.88	7.68e-06	1.31e-08	Poorly soluble	-13.34	2.69e-11	4.59e-14	Insoluble	Low	No	No	Yes	Yes	No	No	Yes	-5.73	1	3	0	0	1	0.55	0	0	3	4.77
ZINC000034803819	O=C1Cc2cc(N[C@H](COc3cncc(-c4ccc5c(c4)CC(=O)N5)c3)Cc3c[nH]c4ccccc34)ccc2N1	C32H27N5O3	529.59	40	27	0.16	8	4	4	161.53	108.14	3.05	3.98	3.99	2.38	5.88	3.85	-5.6	0.00132	2.5e-06	Moderately soluble	-5.95	0.000591	1.12e-06	Moderately soluble	-11.88	6.95e-10	1.31e-12	Insoluble	High	No	Yes	Yes	Yes	Yes	No	Yes	-6.7	1	2	0	0	0	0.55	0	0	3	4.28
ZINC000034803823	c1ccc2c(C[C@@H](COc3cncc(-c4cc5cnccc5s4)c3)Nc3cc4cnccc4s3)c[nH]c2c1	C30H23N5OS2	533.67	38	33	0.1	8	4	2	157.31	132.2	3.51	6.54	7.36	2.64	8.3	5.67	-7.38	2.21e-05	4.13e-08	Poorly soluble	-9.11	4.1e-07	7.69e-10	Poorly soluble	-12.04	4.88e-10	9.14e-13	Insoluble	Low	No	No	Yes	No	Yes	No	Yes	-4.91	1	3	0	2	1	0.55	0	0	3	4.36
ZINC000034803826	CC(C)(Cc1cccnc1)[C@H]1C(=O)Nc2ccc(-c3cncc(OC[C@@H](N)Cc4c[nH]c5ccccc45)c3)cc21	C33H33N5O2	531.65	40	27	0.24	9	5	3	161.37	105.92	3.29	4.62	5.31	2.48	6.39	4.42	-5.95	0.000593	1.12e-06	Moderately soluble	-6.57	0.000143	2.69e-07	Poorly soluble	-11.6	1.33e-09	2.5e-12	Insoluble	High	No	No	Yes	Yes	No	No	Yes	-6.26	1	3	0	0	0	0.55	0	0	3	4.76
ZINC000034803831	O=C1Cc2ccc(N[C@H](COc3cncc(-c4ccc5c(c4)NC(=O)C5)c3)Cc3c[nH]c4ccccc34)cc2N1	C32H27N5O3	529.59	40	27	0.16	8	4	4	161.53	108.14	3.24	3.98	3.99	2.38	5.88	3.89	-5.6	0.00132	2.5e-06	Moderately soluble	-5.95	0.000591	1.12e-06	Moderately soluble	-11.88	6.95e-10	1.31e-12	Insoluble	High	No	Yes	Yes	Yes	Yes	No	Yes	-6.7	1	2	0	0	0	0.55	0	0	3	4.28
ZINC000034803835	c1ccc2c(C[C@@H](COc3cncc(-c4cc5ccncc5s4)c3)Nc3cc4ccncc4s3)c[nH]c2c1	C30H23N5OS2	533.67	38	33	0.1	8	4	2	157.31	132.2	3.46	6.54	7.36	2.64	8.3	5.66	-7.38	2.21e-05	4.13e-08	Poorly soluble	-9.11	4.1e-07	7.69e-10	Poorly soluble	-12.04	4.88e-10	9.14e-13	Insoluble	Low	No	No	Yes	No	Yes	No	Yes	-4.91	1	3	0	2	1	0.55	0	0	3	4.43
ZINC000034803837	O=c1[nH]c2ccc(N[C@H](COc3cncc(-c4ccc5nc(O)oc5c4)c3)Cc3c[nH]c4ccccc34)cc2o1	C30H23N5O5	533.53	40	33	0.1	8	7	4	150.93	142.2	2.66	5.31	5.42	2.28	5.47	4.23	-6.58	0.000142	2.66e-07	Poorly soluble	-8.05	4.78e-06	8.96e-09	Poorly soluble	-11.26	2.93e-09	5.48e-12	Insoluble	Low	No	No	No	No	Yes	No	No	-5.78	1	2	1	1	1	0.55	0	0	3	4.52
ZINC000034803841	CC(C)(Cc1ccc[nH]1)[C@@H]1C(=O)Nc2ccc(-c3cncc(OC[C@@H](N)Cc4c[nH]c5ccccc45)c3)cc21	C32H33N5O2	519.64	39	26	0.25	9	4	4	157.93	108.82	3.13	4.51	5.24	2.33	6.47	4.34	-5.8	0.000819	1.58e-06	Moderately soluble	-6.52	0.000158	3.04e-07	Poorly soluble	-11.2	3.29e-09	6.32e-12	Insoluble	High	No	Yes	Yes	Yes	No	No	Yes	-6.27	1	3	0	0	0	0.55	0	0	3	4.77
ZINC000034803847	Cc1ccc(CC(C)(C)[C@H]2C(=O)Nc3ccc(-c4cncc(OC[C@@H](N)Cc5c[nH]c6ccccc56)c4)cc32)o1	C33H34N4O3	534.65	40	26	0.27	9	5	3	160.81	106.17	4.04	5.19	5.81	2.51	6.88	4.89	-6.31	0.000261	4.88e-07	Poorly soluble	-7.17	3.64e-05	6.82e-08	Poorly soluble	-11.57	1.43e-09	2.68e-12	Insoluble	Low	No	No	Yes	Yes	No	No	Yes	-5.88	1	4	0	0	1	0.55	0	0	3	4.94
ZINC000034803853	CCc1c(C)[nH]c(CC(C)(C)[C@H]2C(=O)Nc3ccc(-c4cncc(OC[C@@H](N)Cc5c[nH]c6ccccc56)c4)cc32)c1C	C36H41N5O2	575.74	43	26	0.33	10	4	4	177.63	108.82	4.12	6.07	6.42	3.05	8.51	5.63	-7.02	5.48e-05	9.52e-08	Poorly soluble	-8.14	4.22e-06	7.32e-09	Poorly soluble	-12.7	1.16e-10	2.01e-13	Insoluble	Low	No	No	Yes	Yes	No	No	Yes	-5.5	1	4	0	1	1	0.55	0	0	3	5.29
ZINC000034803860	O=C1Nc2ccc(N[C@H](COc3cncc(-c4ccc5c(c4)C(=O)C(=O)N5)c3)Cc3c[nH]c4ccccc34)cc2C1=O	C32H23N5O5	557.56	42	27	0.09	8	6	4	162.38	142.28	1.74	3.87	3.27	0.7	5.27	2.97	-5.68	0.00116	2.08e-06	Moderately soluble	-6.55	0.000155	2.79e-07	Poorly soluble	-11.63	1.32e-09	2.37e-12	Insoluble	Low	No	Yes	Yes	Yes	Yes	No	Yes	-6.95	1	2	1	1	0	0.55	0	1	3	4.27
ZINC000034803863	O=Nc1c(O)[nH]c2ccc(N[C@H](COc3cncc(-c4ccc5[nH]c(O)c(N=O)c5c4)c3)Cc3c[nH]c4ccccc34)cc12	C32H25N7O5	587.58	44	33	0.09	10	8	6	169.62	180.84	3.21	6.34	7.31	1.75	6.29	4.98	-7.37	2.49e-05	4.24e-08	Poorly soluble	-9.93	6.94e-08	1.18e-10	Poorly soluble	-11.35	2.61e-09	4.44e-12	Insoluble	Low	No	No	No	No	Yes	No	No	-5.38	3	3	1	2	3	0.17	0	0	3	4.4
ZINC000034803866	N#CCn1c(=O)[nH]c2ccc(N[C@H](COc3cncc(-c4ccc5[nH]c(=O)n(CC#N)c5c4)c3)Cc3c[nH]c4ccccc34)cc21	C34H27N9O3	609.64	46	33	0.15	10	6	4	174.82	173.1	2.25	3.5	4.47	1.46	5.19	3.37	-5.7	0.00123	2.02e-06	Moderately soluble	-6.82	9.26e-05	1.52e-07	Poorly soluble	-10.97	6.53e-09	1.07e-11	Insoluble	Low	No	Yes	Yes	No	Yes	No	Yes	-7.53	2	3	1	1	2	0.17	0	0	2	4.56
ZINC000034803870	Cc1cc(CC(C)(C)[C@@H]2C(=O)Nc3ccc(-c4cncc(OC[C@@H](N)Cc5c[nH]c6ccccc56)c4)cc32)oc1C	C34H36N4O3	548.67	41	26	0.29	9	5	3	165.78	106.17	3.71	5.55	6.12	2.69	7.42	5.1	-6.61	0.000134	2.43e-07	Poorly soluble	-7.54	1.58e-05	2.88e-08	Poorly soluble	-11.94	6.27e-10	1.14e-12	Insoluble	Low	No	No	Yes	Yes	No	No	Yes	-5.71	1	4	0	1	1	0.55	0	0	3	5.11
ZINC000034803876	O=c1[nH]c2ccc(N[C@H](COc3cncc(-c4ccc5[nH]c(=O)[nH]c5c4)c3)Cc3c[nH]c4ccccc34)cc2[nH]1	C30H25N7O3	531.56	40	33	0.1	8	4	6	155.9	147.24	2.29	3.56	4.48	2.35	6.35	3.81	-5.46	0.00184	3.46e-06	Moderately soluble	-6.34	0.000244	4.6e-07	Poorly soluble	-11.74	9.7e-10	1.82e-12	Insoluble	Low	No	No	Yes	No	Yes	No	No	-7.01	2	2	1	1	1	0.17	0	0	3	4.16
ZINC000034803879	Cn1cccc1CC(C)(C)[C@H]1C(=O)Nc2ccc(-c3cncc(OC[C@@H](N)Cc4c[nH]c5ccccc45)c3)cc21	C33H35N5O2	533.66	40	26	0.27	9	4	3	162.83	97.96	3.5	4.46	5.25	2.51	5.97	4.34	-5.85	0.000762	1.43e-06	Moderately soluble	-6.24	0.00031	5.8e-07	Poorly soluble	-10.74	9.6e-09	1.8e-11	Insoluble	High	No	Yes	Yes	Yes	No	No	Yes	-6.39	1	3	0	0	0	0.55	0	0	3	4.92
ZINC000034803885	CC(C)(Cc1ccccn1)[C@H]1C(=O)Nc2ccc(-c3cncc(OC[C@@H](N)Cc4c[nH]c5ccccc45)c3)cc21	C33H33N5O2	531.65	40	27	0.24	9	5	3	161.37	105.92	3.3	4.65	5.31	2.48	6.39	4.43	-5.97	0.000568	1.07e-06	Moderately soluble	-6.6	0.000133	2.51e-07	Poorly soluble	-11.6	1.33e-09	2.5e-12	Insoluble	High	No	No	Yes	Yes	No	No	Yes	-6.24	1	3	0	0	0	0.55	0	0	3	4.81
ZINC000034803890	CC(C)(CC1CC1)[C@@H]1C(=O)Nc2ccc(-c3cncc(OC[C@@H](N)Cc4c[nH]c5ccccc45)c3)cc21	C31H34N4O2	494.63	37	21	0.35	9	4	3	151.4	93.03	3.52	5.39	5.41	3.11	6.37	4.76	-6.13	0.000368	7.44e-07	Poorly soluble	-7.1	3.95e-05	7.98e-08	Poorly soluble	-10.1	3.93e-08	7.94e-11	Insoluble	High	No	Yes	No	Yes	No	Yes	Yes	-5.49	0	3	0	0	1	0.55	0	0	3	4.67
ZINC000034803894	O=C1Nc2ccc(N[C@H](COc3cncc(-c4ccc5c(c4)C(F)(F)C(=O)N5)c3)Cc3c[nH]c4ccccc34)cc2C1(F)F	C32H23F4N5O3	601.55	44	27	0.16	8	8	4	161.5	108.14	2.92	5.46	6.55	2.75	6.7	4.88	-6.94	6.98e-05	1.16e-07	Poorly soluble	-7.49	1.96e-05	3.25e-08	Poorly soluble	-12.88	7.84e-11	1.3e-13	Insoluble	Low	No	No	Yes	No	Yes	No	Yes	-6.09	1	3	0	1	2	0.55	0	0	3	4.45
ZINC000034803902	C[C@@H]1C(=O)Nc2ccc(-c3cncc(OC[C@H](Cc4c[nH]c5ccccc45)Nc4ccc5c(c4)[C@@H](C)C(=O)N5)c3)cc21	C34H31N5O3	557.64	42	27	0.21	8	4	4	171.15	108.14	3.18	5.12	5.11	2.75	6.12	4.46	-6.47	0.000189	3.38e-07	Poorly soluble	-7.14	4.08e-05	7.33e-08	Poorly soluble	-12.16	3.85e-10	6.9e-13	Insoluble	High	No	No	Yes	No	Yes	No	Yes	-6.07	1	3	0	0	1	0.55	0	0	3	4.98
ZINC000034803914	CC[C@@H]1C(=O)Nc2ccc(-c3cncc(OC[C@H](Cc4c[nH]c5ccccc45)Nc4ccc5c(c4)[C@@H](CC)C(=O)N5)c3)cc21	C36H35N5O3	585.69	44	27	0.25	10	4	4	180.76	108.14	3.38	5.83	5.89	3.11	6.94	5.03	-6.94	6.75e-05	1.15e-07	Poorly soluble	-7.87	7.87e-06	1.34e-08	Poorly soluble	-12.94	6.8e-11	1.16e-13	Insoluble	Low	No	No	Yes	No	Yes	No	Yes	-5.73	1	4	0	1	1	0.55	0	0	3	5.22
ZINC000034803929	O=C1Nc2ccc(N[C@H](COc3cncc(-c4ccc5c(c4)[C@@H](Cc4ccccc4)C(=O)N5)c3)Cc3c[nH]c4ccccc34)cc2[C@H]1Cc1ccccc1	C46H39N5O3	709.83	54	39	0.15	12	4	4	220.12	108.14	3.43	7.96	7.55	4.41	8.95	6.46	-9	7.13e-07	1e-09	Poorly soluble	-10.08	5.87e-08	8.27e-11	Insoluble	-17.02	6.81e-15	9.59e-18	Insoluble	Low	No	Yes	No	No	No	No	Yes	-4.98	2	4	1	1	3	0.17	0	0	3	5.83
ZINC000034803941	CC(C)(Cc1ccc(Cl)cc1Cl)[C@@H]1C(=O)Nc2ccc(-c3cncc(OC[C@@H](N)Cc4c[nH]c5ccccc45)c3)cc21	C34H32Cl2N4O2	599.55	42	27	0.24	9	4	3	173.6	93.03	3.98	6.94	7.22	4.36	8.26	6.15	-7.81	9.26e-06	1.54e-08	Poorly soluble	-8.71	1.18e-06	1.97e-09	Poorly soluble	-13.12	4.55e-11	7.59e-14	Insoluble	Low	No	No	Yes	No	No	Yes	Yes	-5.03	2	4	0	1	1	0.17	0	0	3	4.85
ZINC000034803947	O=C1Cc2ccc(N[C@H](COc3cncc(-c4ccc5c(n4)NC(=O)C5)c3)Cc3c[nH]c4ccccc34)nc2N1	C30H25N7O3	531.56	40	27	0.17	8	6	4	157.12	133.92	2.78	2.87	2.78	1.67	4.73	2.97	-4.92	0.00646	1.22e-05	Moderately soluble	-5.34	0.00242	4.55e-06	Moderately soluble	-11.13	3.9e-09	7.33e-12	Insoluble	High	No	Yes	Yes	Yes	Yes	Yes	Yes	-7.5	1	2	0	1	0	0.55	0	0	2	4.42
ZINC000034803950	CC(C)=C1C(=O)Nc2ccc(N[C@H](COc3cncc(-c4ccc5c(c4)C(=C(C)C)C(=O)N5)c3)Cc3c[nH]c4ccccc34)cc21	C38H35N5O3	609.72	46	27	0.18	8	4	4	191.01	108.14	3.08	6.95	6.49	3.33	7.66	5.5	-7.91	7.59e-06	1.24e-08	Poorly soluble	-9.03	5.64e-07	9.24e-10	Poorly soluble	-13.39	2.49e-11	4.08e-14	Insoluble	Low	No	No	Yes	No	No	Yes	No	-5.08	1	4	0	1	2	0.55	0	1	3	5.07
ZINC000034894468	CCn1c(-c2nonc2N)nc2c(C#CC(C)(C)O)ncc(OC[C@@H]3CCCNC3)c21	C21H27N7O3	425.48	31	14	0.52	5	8	3	119.98	137.14	3.71	0.27	1.29	0.76	1.73	1.55	-2.65	0.948	0.00223	Soluble	-2.71	0.827	0.00194	Soluble	-4.72	0.00816	1.92e-05	Moderately soluble	High	No	Yes	Yes	No	No	No	No	-8.7	0	0	0	1	0	0.55	0	1	1	4.57
ZINC000035000883	O=C1/C(=C/c2ccccn2)CNC/C1=C\c1ccccn1	C17H15N3O	277.32	21	12	0.12	2	4	1	85.77	54.88	2.35	1.1	1.52	0.81	3.34	1.82	-2.54	0.794	0.00286	Soluble	-1.85	3.96	0.0143	Very soluble	-5.56	0.000771	2.78e-06	Moderately soluble	High	Yes	No	Yes	No	No	No	Yes	-7.21	0	0	0	0	0	0.55	1	1	0	2.79
ZINC000035076001	CCn1c(-c2nonc2N)nc2cncc(C(=O)N3CC[C@H](N)C3)c21	C15H18N8O2	342.36	25	14	0.4	4	7	2	93.31	141.98	2.23	-1.44	-0.12	-0.25	-0.57	-0.03	-1.21	21.3	0.0623	Very soluble	-1.04	31.3	0.0915	Very soluble	-2.9	0.428	0.00125	Soluble	Low	No	Yes	Yes	No	No	No	No	-9.41	0	0	1	1	0	0.55	0	0	0	3.53
ZINC000035793257	N[C@H](CNc1nnc(-c2ccc3[nH]ncc3c2)s1)Cc1ccc(Cl)cc1	C18H17ClN6S	384.89	26	20	0.17	6	4	3	106.12	120.75	2.55	3.69	3.53	2.62	4.51	3.38	-4.72	0.00726	1.89e-05	Moderately soluble	-5.92	0.000467	1.21e-06	Moderately soluble	-7.57	1.03e-05	2.69e-08	Poorly soluble	High	No	Yes	No	Yes	Yes	Yes	Yes	-6.03	0	0	0	0	0	0.55	0	0	2	3.62
ZINC000035827374	N[C@H](CNc1nnc(-c2ccc3cnccc3c2)s1)Cc1ccc(C(F)(F)F)cc1	C21H18F3N5S	429.46	30	21	0.19	7	7	2	111.76	104.96	3.23	4.49	5.72	3.1	5.42	4.39	-5.39	0.00176	4.1e-06	Moderately soluble	-6.41	0.000165	3.85e-07	Poorly soluble	-8.59	1.1e-06	2.56e-09	Poorly soluble	Low	No	Yes	Yes	Yes	Yes	Yes	Yes	-5.73	0	1	0	0	0	0.55	0	0	2	3.78
ZINC000035849752	Cc1[nH]nc2ccc(-c3cc(OC[C@@H](N)Cc4ccccc4)cnc3-c3cccs3)cc12	C26H24N4OS	440.56	32	26	0.15	7	4	2	130.9	105.06	3.36	4.94	5.61	2.98	6.83	4.74	-5.82	0.000662	1.5e-06	Moderately soluble	-6.88	5.76e-05	1.31e-07	Poorly soluble	-9.87	5.94e-08	1.35e-10	Poorly soluble	Low	No	Yes	No	No	Yes	Yes	Yes	-5.48	0	2	0	0	0	0.55	0	0	2	4.07
ZINC000035859398	Cc1n[nH]c2ccc(-c3nnc(NC[C@@H](N)Cc4cccc(F)c4)s3)cc12	C19H19FN6S	382.46	27	20	0.21	6	5	3	106.03	120.75	2.77	3.56	3.74	2.74	4.81	3.52	-4.61	0.00947	2.48e-05	Moderately soluble	-5.78	0.000633	1.66e-06	Moderately soluble	-7.62	9.11e-06	2.38e-08	Poorly soluble	High	No	Yes	No	Yes	Yes	Yes	Yes	-6.11	0	0	0	0	0	0.55	0	0	2	3.79
ZINC000035860685	N[C@H](CNc1nnc(-c2ccc3[nH]ncc3c2)s1)Cc1ccc(C(F)(F)F)cc1	C19H17F3N6S	418.44	29	20	0.21	7	7	3	106.11	120.75	2.6	3.94	5.04	2.96	4.94	3.9	-4.96	0.00454	1.08e-05	Moderately soluble	-6.18	0.000279	6.68e-07	Poorly soluble	-7.81	6.45e-06	1.54e-08	Poorly soluble	Low	No	Yes	Yes	Yes	Yes	Yes	Yes	-6.06	0	0	0	0	0	0.55	0	0	2	3.76
ZINC000035933620	Cc1n[nH]c2ccc(-c3cc(OC[C@@H](N)Cc4ccccc4)cnc3-c3ccc[nH]3)cc12	C26H25N5O	423.51	32	26	0.15	7	4	3	127.38	92.61	2.66	4.05	4.88	2.17	5.71	3.89	-5.16	0.00295	6.97e-06	Moderately soluble	-5.7	0.000848	2e-06	Moderately soluble	-9.83	6.31e-08	1.49e-10	Poorly soluble	High	No	Yes	No	Yes	Yes	Yes	Yes	-6.01	0	0	0	0	0	0.55	0	0	2	3.96
ZINC000035969548	Cc1[nH]nc2ccc(-c3cc(OC[C@@H](N)Cc4ccccc4)cnc3-c3ccco3)cc12	C26H24N4O2	424.49	32	26	0.15	7	5	2	125.29	89.96	3.22	4.33	5.14	2.17	5.58	4.09	-5.34	0.00194	4.58e-06	Moderately soluble	-5.93	0.000495	1.17e-06	Moderately soluble	-9.83	6.28e-08	1.48e-10	Poorly soluble	High	No	Yes	No	No	Yes	Yes	Yes	-5.82	0	0	0	0	0	0.55	0	0	2	4.11
ZINC000035983627	Cc1n[nH]c2ccc(-c3nnc(NC[C@@H](N)Cc4ccc(Cl)cc4)s3)cc12	C19H19ClN6S	398.91	27	20	0.21	6	4	3	111.09	120.75	2.87	4.09	3.83	2.85	5.03	3.73	-5.04	0.00362	9.08e-06	Moderately soluble	-6.33	0.000186	4.67e-07	Poorly soluble	-7.95	4.52e-06	1.13e-08	Poorly soluble	High	No	Yes	No	Yes	Yes	Yes	Yes	-5.83	0	0	0	0	0	0.55	0	0	2	3.72
ZINC000035998651	COc1ccccc1-c1ncc(OC[C@@H](N)Cc2ccccc2)cc1-c1ccc2[nH]nc(C)c2c1	C29H28N4O2	464.56	35	27	0.17	8	5	2	139.52	86.05	3.55	5.2	5.56	2.99	6.27	4.72	-6.04	0.000425	9.14e-07	Poorly soluble	-6.75	8.18e-05	1.76e-07	Poorly soluble	-10.7	9.18e-09	1.98e-11	Insoluble	High	No	Yes	No	No	Yes	Yes	Yes	-5.44	0	1	0	0	1	0.55	0	0	3	4.21
ZINC000036382821	NC1(c2ccc(-c3nc4ccn5c(=O)[nH]nc5c4cc3-c3ccccc3)cc2)CCC1	C25H21N5O	407.47	31	25	0.16	3	4	2	121.85	89.07	3.32	2.98	4.13	3.65	4.38	3.69	-4.64	0.00928	2.28e-05	Moderately soluble	-4.51	0.0125	3.06e-05	Moderately soluble	-8.61	9.96e-07	2.44e-09	Poorly soluble	High	No	Yes	Yes	Yes	No	Yes	No	-6.67	0	0	0	0	0	0.55	0	0	1	3.11
ZINC000038224982	NC1(C(=O)NCc2ccc(Cl)cc2)CCN(c2ncnc3[nH]ccc23)CC1	C19H21ClN6O	384.86	27	15	0.32	5	4	3	108.2	99.93	2.21	1.99	1.69	1.76	2.44	2.02	-3.56	0.106	0.000275	Soluble	-3.71	0.0742	0.000193	Soluble	-6.37	0.000166	4.31e-07	Poorly soluble	High	No	Yes	Yes	No	No	Yes	Yes	-7.23	0	0	0	0	0	0.55	0	0	1	2.98
ZINC000038225322	Cc1n[nH]c2ccc(-c3nnc(NC[C@@H](N)Cc4ccc(F)c(F)c4)s3)cc12	C19H18F2N6S	400.45	28	20	0.21	6	6	3	105.99	120.75	2.54	3.66	4.3	3.12	5.23	3.77	-4.76	0.00694	1.73e-05	Moderately soluble	-5.88	0.000522	1.3e-06	Moderately soluble	-7.89	5.18e-06	1.29e-08	Poorly soluble	High	No	Yes	No	Yes	Yes	Yes	Yes	-6.14	0	0	0	0	0	0.55	0	0	2	3.81
ZINC000038225736	N[C@H](CNc1nnc(-c2ccc3[nH]ncc3c2)s1)Cc1ccc(Cl)cc1Cl	C18H16Cl2N6S	419.33	27	20	0.17	6	4	3	111.13	120.75	2.6	4.31	4.18	3.12	5.15	3.87	-5.31	0.00207	4.93e-06	Moderately soluble	-6.56	0.000116	2.76e-07	Poorly soluble	-8.16	2.92e-06	6.97e-09	Poorly soluble	High	No	Yes	No	Yes	Yes	Yes	Yes	-5.8	0	0	0	0	0	0.55	0	0	2	3.68
ZINC000038279188	NC1(COCc2ccc(Cl)cc2)CCN(c2ncnc3[nH]ccc23)CC1	C19H22ClN5O	371.86	26	15	0.37	5	4	2	106.28	80.06	3.13	2.53	2.59	2.23	3.23	2.74	-3.84	0.0542	0.000146	Soluble	-3.86	0.0516	0.000139	Soluble	-6.52	0.000112	3.02e-07	Poorly soluble	High	No	Yes	Yes	Yes	No	Yes	Yes	-6.77	0	0	0	0	0	0.55	0	0	1	3.19
ZINC000038388739	N[C@H](COc1cncc(-c2cccc3cnccc23)c1)Cc1c[nH]c2ccccc12	C25H22N4O	394.47	30	25	0.12	6	4	2	120.13	76.82	2.49	3.84	4.73	1.96	5.14	3.63	-4.93	0.00468	1.19e-05	Moderately soluble	-5.15	0.0028	7.09e-06	Moderately soluble	-9.41	1.52e-07	3.85e-10	Poorly soluble	High	No	Yes	No	Yes	Yes	Yes	Yes	-5.98	0	0	0	0	0	0.55	0	0	2	3.61
ZINC000038389926	N[C@H](COc1cncc(-c2ccc3[nH]nc(-c4ccccc4)c3c2)c1)Cc1c[nH]c2ccccc12	C29H25N5O	459.54	35	30	0.1	7	4	3	139.92	92.61	3.13	4.95	5.72	2.86	6.2	4.57	-5.98	0.000481	1.05e-06	Moderately soluble	-6.63	0.000107	2.33e-07	Poorly soluble	-11.08	3.82e-09	8.32e-12	Insoluble	High	No	Yes	No	No	Yes	Yes	Yes	-5.59	0	2	0	0	0	0.55	0	0	2	3.99
ZINC000038411434	N[C@H](COc1cncc(-c2ccc(CO)cc2)c1)Cc1c[nH]c2ccccc12	C23H23N3O2	373.45	28	21	0.17	7	4	3	110.96	84.16	2.95	2.77	3.52	1.72	4.59	3.11	-3.99	0.0379	0.000102	Soluble	-4.19	0.0239	6.41e-05	Moderately soluble	-7.96	4.11e-06	1.1e-08	Poorly soluble	High	No	Yes	No	Yes	No	Yes	Yes	-6.61	0	0	0	0	0	0.55	0	0	1	3.58
ZINC000038411879	N[C@H](COc1cncc(-c2ccc3ccccc3c2)c1)Cc1c[nH]c2ccccc12	C26H23N3O	393.48	30	25	0.12	6	3	2	122.34	63.93	3.17	4.91	5.33	3	5.71	4.42	-5.59	0.001	2.55e-06	Moderately soluble	-5.99	0.000404	1.03e-06	Moderately soluble	-9.79	6.43e-08	1.63e-10	Poorly soluble	High	No	Yes	Yes	Yes	Yes	Yes	Yes	-5.21	0	0	0	0	0	0.55	0	0	2	3.64
ZINC000038411973	Nc1[nH]nc2ccc(-c3cncc(OC[C@@H](N)Cc4c[nH]c5ccccc45)c3)cc12	C23H22N6O	398.46	30	24	0.13	6	4	4	118.89	118.63	1.53	2.94	3.65	1.72	3.93	2.75	-4.36	0.0174	4.38e-05	Moderately soluble	-5.09	0.00321	8.07e-06	Moderately soluble	-8.26	2.18e-06	5.47e-09	Poorly soluble	High	No	Yes	No	Yes	No	Yes	Yes	-6.64	0	0	0	0	0	0.55	0	0	1	3.68
ZINC000038412441	N[C@H](COc1cncc(-c2ccc3[nH]nc(C4CC4)c3c2)c1)Cc1c[nH]c2ccccc12	C26H25N5O	423.51	32	24	0.23	7	4	3	126.95	92.61	2.77	3.87	4.87	2.47	5.6	3.91	-5	0.00427	1.01e-05	Moderately soluble	-5.51	0.0013	3.08e-06	Moderately soluble	-9.2	2.68e-07	6.34e-10	Poorly soluble	High	No	Yes	No	Yes	Yes	Yes	Yes	-6.14	0	0	0	0	0	0.55	0	0	2	3.9
ZINC000038413280	N[C@H](COc1cncc(-c2ccc3[nH]nc(N4CCOCC4)c3c2)c1)Cc1c[nH]c2ccccc12	C27H28N6O2	468.55	35	24	0.26	7	5	3	140.21	105.08	2.89	3.37	3.51	2.02	4.52	3.26	-4.91	0.00572	1.22e-05	Moderately soluble	-5.25	0.00261	5.56e-06	Moderately soluble	-8.74	8.53e-07	1.82e-09	Poorly soluble	High	No	Yes	No	Yes	Yes	Yes	Yes	-6.77	0	1	0	0	0	0.55	0	0	1	4.17
ZINC000038459828	N[C@H](COc1cncc(-c2ccc3nnccc3c2)c1)Cc1c[nH]c2ccccc12	C24H21N5O	395.46	30	25	0.12	6	5	2	117.93	89.71	2.52	2.92	4.12	2.02	4.57	3.23	-4.35	0.0176	4.45e-05	Moderately soluble	-4.47	0.0135	3.43e-05	Moderately soluble	-9.04	3.6e-07	9.1e-10	Poorly soluble	High	No	Yes	No	Yes	Yes	Yes	Yes	-6.64	0	0	0	0	0	0.55	0	0	1	3.58
ZINC000038480207	CN(C)c1n[nH]c2ccc(-c3cncc(OC[C@@H](N)Cc4c[nH]c5ccccc45)c3)cc12	C25H26N6O	426.51	32	24	0.2	7	4	3	128.69	95.85	2.59	3.75	4.12	2.14	4.34	3.39	-4.94	0.0049	1.15e-05	Moderately soluble	-5.46	0.00149	3.5e-06	Moderately soluble	-8.71	8.37e-07	1.96e-09	Poorly soluble	High	No	Yes	No	Yes	Yes	Yes	Yes	-6.24	0	0	0	0	0	0.55	0	0	2	3.91
ZINC000039187982	NC[C@@H](NC(=O)c1ccc(-c2ccnc3[nH]ccc23)s1)c1ccccc1	C20H18N4OS	362.45	26	20	0.1	6	3	3	104.4	112.04	2.61	2.85	3.4	2.11	4.54	3.1	-4.06	0.0319	8.79e-05	Moderately soluble	-4.86	0.00499	1.38e-05	Moderately soluble	-7.26	1.99e-05	5.48e-08	Poorly soluble	High	No	Yes	No	Yes	Yes	Yes	Yes	-6.49	0	0	0	0	0	0.55	0	0	1	3.29
ZINC000039274991	COc1c(NC(=O)Nc2ccc(-c3ccc(CN4CCOCC4)nc3)c3ccccc23)cc(C(C)(C)C)cc1NS(C)(=O)=O	C33H39N5O5S	617.76	44	22	0.33	11	7	3	179.91	130.27	3.54	4.4	6.03	2.07	4.24	4.06	-6.09	0.000507	8.2e-07	Poorly soluble	-6.85	8.67e-05	1.4e-07	Poorly soluble	-10.75	1.09e-08	1.77e-11	Insoluble	Low	No	No	No	Yes	Yes	No	Yes	-6.94	1	4	1	1	1	0.55	0	0	3	4.5
ZINC000040378997	CCn1c(-c2nonc2N)nc2c(-c3ccoc3)ncc(OCCCN)c21	C17H19N7O3	369.38	27	19	0.29	7	8	2	97.81	144.04	3.06	-0.04	2.08	-0.27	1.22	1.21	-2.16	2.53	0.00686	Soluble	-2.53	1.08	0.00292	Soluble	-5.41	0.00145	3.93e-06	Moderately soluble	Low	No	Yes	Yes	No	No	No	Yes	-8.58	0	0	1	1	0	0.55	0	0	1	3.65
ZINC000040393684	COc1cc2c(cc1Nc1nc(Nc3cccc4c3C(=O)NC4)c3cc[nH]c3n1)N(C(=O)CN(C)C)CC2	C27H28N8O3	512.56	38	21	0.26	8	6	4	151.94	127.51	3.49	2.7	2.23	1.06	2.4	2.38	-4.6	0.0129	2.51e-05	Moderately soluble	-5.03	0.00478	9.32e-06	Moderately soluble	-8.46	1.8e-06	3.51e-09	Poorly soluble	High	No	Yes	No	Yes	Yes	Yes	Yes	-7.51	2	2	0	0	0	0.17	0	0	2	3.87
ZINC000040394472	CNC[C@@H](Cc1ccccc1)NC(=O)c1cc(Br)c(-c2ccnc3[nH]ccc23)s1	C22H21BrN4OS	469.4	29	20	0.18	8	3	3	121.81	98.05	3.28	4.55	4.61	3.14	6.06	4.33	-5.6	0.00118	2.52e-06	Moderately soluble	-6.33	0.000219	4.66e-07	Poorly soluble	-9.22	2.83e-07	6.04e-10	Poorly soluble	High	No	Yes	Yes	Yes	Yes	Yes	Yes	-5.93	0	0	0	0	0	0.55	0	0	3	3.75
ZINC000040394473	CNC[C@H](Cc1ccccc1)NC(=O)c1cc(Br)c(-c2ccnc3[nH]ccc23)s1	C22H21BrN4OS	469.4	29	20	0.18	8	3	3	121.81	98.05	3.39	4.55	4.61	3.14	6.06	4.35	-5.6	0.00118	2.52e-06	Moderately soluble	-6.33	0.000219	4.66e-07	Poorly soluble	-9.22	2.83e-07	6.04e-10	Poorly soluble	High	No	Yes	Yes	Yes	Yes	Yes	Yes	-5.93	0	0	0	0	0	0.55	0	0	3	3.75
ZINC000040394854	NCCNC(=O)c1cc(Br)c(-c2ccnc3[nH]ccc23)s1	C14H13BrN4OS	365.25	21	14	0.14	5	3	3	87.62	112.04	1.97	2.02	2.74	1.53	3.94	2.44	-3.54	0.105	0.000288	Soluble	-4	0.0365	0.0001	Moderately soluble	-5.95	0.00041	1.12e-06	Moderately soluble	High	No	Yes	Yes	Yes	No	Yes	Yes	-7.09	0	0	0	0	0	0.55	0	0	1	2.87
ZINC000040395519	NC[C@@H](NC(=O)c1cc(-c2c[nH]c3ncccc23)cs1)c1ccccc1	C20H18N4OS	362.45	26	20	0.1	6	3	3	104.4	112.04	2.48	2.82	3.4	2.11	4.54	3.07	-4.04	0.0333	9.18e-05	Moderately soluble	-4.83	0.00536	1.48e-05	Moderately soluble	-7.26	1.99e-05	5.48e-08	Poorly soluble	High	No	Yes	No	Yes	Yes	Yes	Yes	-6.51	0	0	0	0	0	0.55	0	0	1	3.37
ZINC000040395520	NC[C@H](NC(=O)c1cc(-c2c[nH]c3ncccc23)cs1)c1ccccc1	C20H18N4OS	362.45	26	20	0.1	6	3	3	104.4	112.04	2.34	2.82	3.4	2.11	4.54	3.04	-4.04	0.0333	9.18e-05	Moderately soluble	-4.83	0.00536	1.48e-05	Moderately soluble	-7.26	1.99e-05	5.48e-08	Poorly soluble	High	No	Yes	No	Yes	Yes	Yes	Yes	-6.51	0	0	0	0	0	0.55	0	0	1	3.37
ZINC000040395521	NC[C@@H](C(=O)Nc1ccc(-c2ccnc3[nH]ccc23)s1)c1ccccc1	C20H18N4OS	362.45	26	20	0.1	6	3	3	105.72	112.04	2.15	3.41	3.78	2.11	4.54	3.2	-4.41	0.0141	3.9e-05	Moderately soluble	-5.44	0.00131	3.61e-06	Moderately soluble	-7.26	1.99e-05	5.48e-08	Poorly soluble	High	No	Yes	No	Yes	Yes	Yes	Yes	-6.09	0	0	0	0	0	0.55	0	0	1	3.36
ZINC000040395522	NC[C@H](C(=O)Nc1ccc(-c2ccnc3[nH]ccc23)s1)c1ccccc1	C20H18N4OS	362.45	26	20	0.1	6	3	3	105.72	112.04	2.4	3.41	3.78	2.11	4.54	3.25	-4.41	0.0141	3.9e-05	Moderately soluble	-5.44	0.00131	3.61e-06	Moderately soluble	-7.26	1.99e-05	5.48e-08	Poorly soluble	High	No	Yes	No	Yes	Yes	Yes	Yes	-6.09	0	0	0	0	0	0.55	0	0	1	3.36
ZINC000040401551	Cc1cc(C(=O)N[C@@H](CN)c2ccccc2)sc1-c1ccnc2[nH]ccc12	C21H20N4OS	376.47	27	20	0.14	6	3	3	109.37	112.04	2.56	3.22	3.71	2.33	5.05	3.37	-4.35	0.0166	4.42e-05	Moderately soluble	-5.25	0.00214	5.68e-06	Moderately soluble	-7.64	8.68e-06	2.31e-08	Poorly soluble	High	No	Yes	No	Yes	Yes	Yes	Yes	-6.31	0	0	0	0	0	0.55	0	0	1	3.49
ZINC000040401554	Cc1cc(C(=O)N[C@H](CN)c2ccccc2)sc1-c1ccnc2[nH]ccc12	C21H20N4OS	376.47	27	20	0.14	6	3	3	109.37	112.04	2.48	3.22	3.71	2.33	5.05	3.36	-4.35	0.0166	4.42e-05	Moderately soluble	-5.25	0.00214	5.68e-06	Moderately soluble	-7.64	8.68e-06	2.31e-08	Poorly soluble	High	No	Yes	No	Yes	Yes	Yes	Yes	-6.31	0	0	0	0	0	0.55	0	0	1	3.49
ZINC000040401942	NC[C@H](CC1CCCCC1)NC(=O)c1cc(Br)c(-c2ccnc3[nH]ccc23)s1	C21H25BrN4OS	461.42	28	14	0.43	7	3	3	119.15	112.04	3.37	5.18	5.08	3.14	5.7	4.49	-5.87	0.000619	1.34e-06	Moderately soluble	-7.28	2.43e-05	5.26e-08	Poorly soluble	-7.35	2.07e-05	4.48e-08	Poorly soluble	High	No	Yes	Yes	Yes	Yes	Yes	Yes	-5.44	0	0	0	0	1	0.55	0	0	2	3.91
ZINC000040405077	NC[C@@H](NC(=O)c1cc(-c2cccnc2)c(-c2ccnc3[nH]ccc23)s1)c1ccccc1	C25H21N5OS	439.53	32	26	0.08	7	4	3	127.64	124.93	2.6	3.41	4.46	2.16	5.52	3.63	-4.85	0.00617	1.4e-05	Moderately soluble	-5.71	0.000851	1.94e-06	Moderately soluble	-9.34	2.01e-07	4.58e-10	Poorly soluble	Low	No	Yes	No	Yes	Yes	Yes	Yes	-6.56	0	0	0	0	0	0.55	0	0	1	3.93
ZINC000040405080	NC[C@H](NC(=O)c1cc(-c2cccnc2)c(-c2ccnc3[nH]ccc23)s1)c1ccccc1	C25H21N5OS	439.53	32	26	0.08	7	4	3	127.64	124.93	2.67	3.41	4.46	2.16	5.52	3.64	-4.85	0.00617	1.4e-05	Moderately soluble	-5.71	0.000851	1.94e-06	Moderately soluble	-9.34	2.01e-07	4.58e-10	Poorly soluble	Low	No	Yes	No	Yes	Yes	Yes	Yes	-6.56	0	0	0	0	0	0.55	0	0	1	3.93
ZINC000040405277	O=C1C[C@H]2O[C@H](c3cccs3)C3=C(C(=O)c4ccccc4C3=O)[C@H]2O1	C19H12O5S	352.36	25	11	0.21	1	5	0	88.78	97.91	2.23	1.8	2.55	1.22	4.09	2.38	-3.42	0.135	0.000382	Soluble	-3.48	0.118	0.000335	Soluble	-5.06	0.00308	8.75e-06	Moderately soluble	High	No	No	Yes	Yes	No	No	Yes	-7.17	0	0	0	0	0	0.55	1	0	1	4.46
ZINC000040407846	NC[C@H](Cc1ccccc1)NC(=O)c1cc(Br)c(-c2ccnc3[nH]ccc23)s1	C21H19BrN4OS	455.37	28	20	0.14	7	3	3	116.91	112.04	2.69	4.04	4.35	2.93	5.6	3.92	-5.28	0.00242	5.31e-06	Moderately soluble	-6.1	0.000365	8.01e-07	Poorly soluble	-8.44	1.67e-06	3.67e-09	Poorly soluble	High	No	Yes	Yes	Yes	Yes	Yes	Yes	-6.21	0	0	0	0	0	0.55	0	0	2	3.65
ZINC000040407850	NC[C@@H](Cc1ccccc1)NC(=O)c1cc(Br)c(-c2ccnc3[nH]ccc23)s1	C21H19BrN4OS	455.37	28	20	0.14	7	3	3	116.91	112.04	2.82	4.04	4.35	2.93	5.6	3.95	-5.28	0.00242	5.31e-06	Moderately soluble	-6.1	0.000365	8.01e-07	Poorly soluble	-8.44	1.67e-06	3.67e-09	Poorly soluble	High	No	Yes	Yes	Yes	Yes	Yes	Yes	-6.21	0	0	0	0	0	0.55	0	0	2	3.65
ZINC000040408980	NC[C@H](NC(=O)c1cc(-c2ccccc2)c(-c2ccnc3[nH]ccc23)s1)c1ccccc1	C26H22N4OS	438.54	32	26	0.08	7	3	3	129.84	112.04	3.06	4.48	5.06	3.18	6.09	4.37	-5.52	0.00132	3.02e-06	Moderately soluble	-6.55	0.000123	2.8e-07	Poorly soluble	-9.71	8.51e-08	1.94e-10	Poorly soluble	High	No	Yes	No	Yes	Yes	Yes	Yes	-5.79	0	0	0	0	0	0.55	0	0	2	3.88
ZINC000040408984	NC[C@@H](NC(=O)c1cc(-c2ccccc2)c(-c2ccnc3[nH]ccc23)s1)c1ccccc1	C26H22N4OS	438.54	32	26	0.08	7	3	3	129.84	112.04	2.91	4.48	5.06	3.18	6.09	4.35	-5.52	0.00132	3.02e-06	Moderately soluble	-6.55	0.000123	2.8e-07	Poorly soluble	-9.71	8.51e-08	1.94e-10	Poorly soluble	High	No	Yes	No	Yes	Yes	Yes	Yes	-5.79	0	0	0	0	0	0.55	0	0	2	3.88
ZINC000040414458	CN(C)CCOc1cc(-c2cn[nH]c2)ccc1NC(=O)[C@@H]1COc2ccccc2O1	C22H24N4O4	408.45	30	17	0.27	8	6	2	112.54	88.71	3.11	2.5	2.6	0.97	2.8	2.4	-3.84	0.0592	0.000145	Soluble	-4.01	0.0401	9.81e-05	Moderately soluble	-6.65	9.21e-05	2.25e-07	Poorly soluble	High	No	Yes	Yes	No	Yes	Yes	Yes	-7.02	0	0	0	0	0	0.55	0	0	2	3.74
ZINC000040414461	CN(C)CCOc1cc(-c2cn[nH]c2)ccc1NC(=O)[C@H]1COc2ccccc2O1	C22H24N4O4	408.45	30	17	0.27	8	6	2	112.54	88.71	2.91	2.5	2.6	0.97	2.8	2.36	-3.84	0.0592	0.000145	Soluble	-4.01	0.0401	9.81e-05	Moderately soluble	-6.65	9.21e-05	2.25e-07	Poorly soluble	High	No	Yes	Yes	No	Yes	Yes	Yes	-7.02	0	0	0	0	0	0.55	0	0	2	3.74
ZINC000040424758	CCC[C@@H]1O[C@@H]2CC(=O)O[C@@H]2C2=C1C(=O)c1ccccc1C2=O	C18H16O5	312.32	23	6	0.39	2	5	0	80.84	69.67	2.33	1.68	2.25	1.18	3.16	2.12	-2.9	0.397	0.00127	Soluble	-2.76	0.546	0.00175	Soluble	-4.49	0.01	3.21e-05	Moderately soluble	High	Yes	No	Yes	Yes	No	No	No	-7.01	0	0	0	0	0	0.55	1	0	0	4.36
ZINC000040429080	NC[C@H](Cc1cccc(F)c1)NC(=O)c1cc(Br)c(-c2ccnc3[nH]ccc23)s1	C21H18BrFN4OS	473.36	29	20	0.14	7	4	3	116.87	112.04	2.8	4.14	4.91	3.03	6.02	4.18	-5.43	0.00175	3.7e-06	Moderately soluble	-6.2	0.000299	6.31e-07	Poorly soluble	-8.7	9.53e-07	2.01e-09	Poorly soluble	High	No	Yes	Yes	Yes	Yes	Yes	Yes	-6.25	0	0	0	0	0	0.55	0	0	2	3.7
ZINC000040429488	CCn1c(-c2nonc2N)nc2c(C#CC(C)(C)O)ncc(OCCCCN)c21	C19H25N7O3	399.45	29	14	0.47	7	8	3	108.47	151.13	3.36	-0.27	1.41	0.31	1.48	1.26	-2.04	3.63	0.00908	Soluble	-2.44	1.43	0.00359	Soluble	-4.39	0.0164	4.1e-05	Moderately soluble	Low	No	Yes	No	No	No	No	No	-8.93	0	0	1	1	1	0.55	0	1	1	4.03
ZINC000040429676	CCn1c(-c2nonc2N)nc2c(C#CC(C)(C)O)ncc(OC[C@@H]3CCNC3)c21	C20H25N7O3	411.46	30	14	0.5	5	8	3	115.17	137.14	3.67	-0.09	0.9	0.54	1.5	1.3	-2.35	1.84	0.00447	Soluble	-2.34	1.89	0.00459	Soluble	-4.45	0.0146	3.54e-05	Moderately soluble	High	No	Yes	Yes	No	No	No	No	-8.87	0	0	0	1	0	0.55	0	1	1	4.47
ZINC000040429678	CCn1c(-c2nonc2N)nc2c(C#CC(C)(C)O)ncc(OC[C@H]3CCNC3)c21	C20H25N7O3	411.46	30	14	0.5	5	8	3	115.17	137.14	3.5	-0.09	0.9	0.54	1.5	1.27	-2.35	1.84	0.00447	Soluble	-2.34	1.89	0.00459	Soluble	-4.45	0.0146	3.54e-05	Moderately soluble	High	No	Yes	Yes	No	No	No	No	-8.87	0	0	0	1	0	0.55	0	1	1	4.47
ZINC000040429704	CCn1c(-c2nonc2N)nc2cncc(C(=O)NC3CCNCC3)c21	C16H20N8O2	356.38	26	14	0.44	5	7	3	98.12	136.78	2.3	-0.75	0.19	0	0.17	0.38	-1.65	8.06	0.0226	Very soluble	-1.65	8.07	0.0226	Very soluble	-4.3	0.0179	5.02e-05	Moderately soluble	High	No	Yes	No	No	No	No	No	-9.01	0	0	0	1	0	0.55	0	0	1	3.2
ZINC000040429758	CCn1c(-c2nonc2N)nc2c(-c3cc[nH]c3)ncc(OCCCN)c21	C17H20N8O2	368.39	27	19	0.29	7	7	3	99.89	146.69	2.6	-0.31	1.81	-0.27	1.35	1.04	-1.99	3.79	0.0103	Very soluble	-2.31	1.8	0.0049	Soluble	-5.4	0.00146	3.95e-06	Moderately soluble	Low	No	Yes	Yes	No	No	No	Yes	-8.77	0	0	1	1	0	0.55	0	0	1	3.57
ZINC000040429811	CCn1c(-c2nonc2N)nc2c(C#CC(C)(C)O)ncc(OCCCN)c21	C18H23N7O3	385.42	28	14	0.44	6	8	3	103.66	151.13	3.37	-0.63	1.02	0.08	1.08	0.98	-1.81	6.01	0.0156	Very soluble	-2.07	3.27	0.00849	Soluble	-3.99	0.0391	0.000101	Soluble	Low	No	Yes	No	No	No	No	No	-9.1	0	0	1	1	1	0.55	0	1	1	3.91
ZINC000040429845	CCn1c(-c2nonc2N)nc2cncc(C(=O)N3CCNCC3)c21	C15H18N8O2	342.36	25	14	0.4	4	7	2	97.32	127.99	2.31	-1.35	-0.62	-0.25	-0.15	-0.01	-1.26	18.7	0.0546	Very soluble	-0.84	49.7	0.145	Very soluble	-3.54	0.0978	0.000286	Soluble	High	No	Yes	No	No	No	No	No	-9.35	0	1	0	0	0	0.55	0	0	0	3.11
ZINC000040430496	CCn1c(-c2nonc2N)nc2c(C#CC(C)(C)O)ncc(OCCCNC[C@H](O)CO)c21	C21H29N7O5	459.5	33	14	0.52	10	10	5	120.5	177.6	3.42	-1.42	0.01	-0.76	1	0.45	-1.45	16.4	0.0356	Very soluble	-1.81	7.16	0.0156	Very soluble	-4.04	0.0415	9.04e-05	Moderately soluble	Low	No	Yes	No	No	No	No	No	-10.11	1	0	1	1	1	0.55	0	1	2	4.74
ZINC000040827942	O=C1C[C@H]2OC3(CCCC3)C3=C(C(=O)c4ccccc4C3=O)[C@H]2O1	C19H16O5	324.33	24	6	0.42	0	5	0	83.57	69.67	2.3	1.45	2.39	1.41	3.24	2.16	-2.95	0.364	0.00112	Soluble	-2.52	0.982	0.00303	Soluble	-4.62	0.00782	2.41e-05	Moderately soluble	High	Yes	Yes	Yes	Yes	Yes	No	Yes	-7.25	0	0	0	0	0	0.55	1	0	0	4.66
ZINC000040834609	CCn1c(-c2nonc2N)nc2cncc(C(=O)NCCNC)c21	C14H18N8O2	330.35	24	14	0.36	7	7	3	86.71	136.78	2.34	-1.3	0.04	-0.5	-0.04	0.11	-1.04	30.2	0.0915	Very soluble	-1.07	27.8	0.0842	Very soluble	-4.36	0.0146	4.42e-05	Moderately soluble	High	No	Yes	No	No	No	No	No	-9.24	0	0	0	1	0	0.55	0	0	0	3.07
ZINC000040835103	CCn1c(-c2nonc2N)nc2c(-c3cn[nH]c3)ncc(OCCCN)c21	C16H19N9O2	369.38	27	19	0.31	7	8	3	97.69	159.58	2.06	-0.81	1.21	-0.46	0.81	0.56	-1.68	7.74	0.021	Very soluble	-2.06	3.2	0.00867	Soluble	-5.03	0.00345	9.33e-06	Moderately soluble	Low	No	Yes	No	No	No	No	Yes	-9.13	1	0	1	1	1	0.55	0	0	1	3.53
ZINC000040846005	CCn1c(-c2nonc2N)nc2c(C#CC(C)(C)O)ncc(OCCN)c21	C17H21N7O3	371.39	27	14	0.41	5	8	3	98.86	151.13	3.09	-0.99	0.63	-0.16	0.69	0.65	-1.57	9.94	0.0268	Very soluble	-1.7	7.45	0.0201	Very soluble	-3.6	0.0933	0.000251	Soluble	Low	No	Yes	No	No	No	No	No	-9.27	0	0	1	1	1	0.55	0	1	1	3.81
ZINC000040846343	COc1ccc2c(c1)C[C@H](c1nc3c(F)cc(-c4ccnc(N)n4)cc3[nH]1)CO2	C21H18FN5O2	391.4	29	21	0.19	3	6	2	106.61	98.94	2.5	2.94	3.9	2.07	3.94	3.07	-4.46	0.0137	3.49e-05	Moderately soluble	-4.68	0.00818	2.09e-05	Moderately soluble	-7.52	1.19e-05	3.03e-08	Poorly soluble	High	No	Yes	Yes	No	Yes	Yes	Yes	-6.6	0	0	0	0	0	0.55	0	0	1	3.65
ZINC000040846345	COc1ccc2c(c1)C[C@@H](c1nc3c(F)cc(-c4ccnc(N)n4)cc3[nH]1)CO2	C21H18FN5O2	391.4	29	21	0.19	3	6	2	106.61	98.94	2.22	2.94	3.9	2.07	3.94	3.01	-4.46	0.0137	3.49e-05	Moderately soluble	-4.68	0.00818	2.09e-05	Moderately soluble	-7.52	1.19e-05	3.03e-08	Poorly soluble	High	No	Yes	Yes	Yes	Yes	Yes	Yes	-6.6	0	0	0	0	0	0.55	0	0	1	3.65
ZINC000040891833	CC(C)NC[C@@H](Cc1ccccc1)NC(=O)c1cc(Br)c(-c2ccnc3[nH]ccc23)s1	C24H25BrN4OS	497.45	31	20	0.25	9	3	3	131.43	98.05	4.03	5.35	5.39	3.55	6.68	5	-6.18	0.00033	6.64e-07	Poorly soluble	-7.16	3.43e-05	6.89e-08	Poorly soluble	-9.62	1.18e-07	2.38e-10	Poorly soluble	High	No	Yes	Yes	Yes	Yes	Yes	Yes	-5.54	0	2	0	0	1	0.55	0	0	3	3.97
ZINC000040891834	CC(C)NC[C@H](Cc1ccccc1)NC(=O)c1cc(Br)c(-c2ccnc3[nH]ccc23)s1	C24H25BrN4OS	497.45	31	20	0.25	9	3	3	131.43	98.05	3.54	5.35	5.39	3.55	6.68	4.9	-6.18	0.00033	6.64e-07	Poorly soluble	-7.16	3.43e-05	6.89e-08	Poorly soluble	-9.62	1.18e-07	2.38e-10	Poorly soluble	High	No	Yes	Yes	Yes	Yes	Yes	Yes	-5.54	0	2	0	0	1	0.55	0	0	3	3.97
ZINC000040892371	CCNC[C@@H](Cc1ccccc1)NC(=O)c1cc(Br)c(-c2ccnc3[nH]ccc23)s1	C23H23BrN4OS	483.42	30	20	0.22	9	3	3	126.62	98.05	3.71	4.92	5	3.35	6.45	4.69	-5.84	0.000705	1.46e-06	Moderately soluble	-6.72	9.3e-05	1.92e-07	Poorly soluble	-9.61	1.19e-07	2.47e-10	Poorly soluble	High	No	Yes	Yes	Yes	Yes	Yes	Yes	-5.76	0	1	0	0	0	0.55	0	0	3	3.86
ZINC000040892373	CCNC[C@H](Cc1ccccc1)NC(=O)c1cc(Br)c(-c2ccnc3[nH]ccc23)s1	C23H23BrN4OS	483.42	30	20	0.22	9	3	3	126.62	98.05	3.69	4.92	5	3.35	6.45	4.68	-5.84	0.000705	1.46e-06	Moderately soluble	-6.72	9.3e-05	1.92e-07	Poorly soluble	-9.61	1.19e-07	2.47e-10	Poorly soluble	High	No	Yes	Yes	Yes	Yes	Yes	Yes	-5.76	0	1	0	0	0	0.55	0	0	3	3.86
ZINC000040892521	NC[C@@H](NC(=O)c1cc(Br)c(-c2ccnc3[nH]ccc23)s1)c1ccccc1	C20H17BrN4OS	441.34	27	20	0.1	6	3	3	112.1	112.04	2.59	3.54	4.16	2.71	5.21	3.64	-4.96	0.00485	1.1e-05	Moderately soluble	-5.58	0.00117	2.65e-06	Moderately soluble	-8.04	3.98e-06	9.02e-09	Poorly soluble	High	No	Yes	No	Yes	Yes	Yes	Yes	-6.48	0	0	0	0	0	0.55	0	0	2	3.57
ZINC000040892523	NC[C@H](NC(=O)c1cc(Br)c(-c2ccnc3[nH]ccc23)s1)c1ccccc1	C20H17BrN4OS	441.34	27	20	0.1	6	3	3	112.1	112.04	2.76	3.54	4.16	2.71	5.21	3.67	-4.96	0.00485	1.1e-05	Moderately soluble	-5.58	0.00117	2.65e-06	Moderately soluble	-8.04	3.98e-06	9.02e-09	Poorly soluble	High	No	Yes	No	Yes	Yes	Yes	Yes	-6.48	0	0	0	0	0	0.55	0	0	2	3.57
ZINC000040893567	NC[C@@H](NCc1ccc(-c2ccnc3[nH]ccc23)s1)c1ccccc1	C20H20N4S	348.46	25	20	0.15	6	3	3	103.98	94.97	2.91	2.65	3.6	2.33	5	3.3	-3.87	0.0474	0.000136	Soluble	-4.3	0.0176	5.06e-05	Moderately soluble	-7.73	6.55e-06	1.88e-08	Poorly soluble	High	No	Yes	No	Yes	Yes	Yes	Yes	-6.54	0	0	0	0	0	0.55	0	0	0	3.28
ZINC000040893570	NC[C@H](NCc1ccc(-c2ccnc3[nH]ccc23)s1)c1ccccc1	C20H20N4S	348.46	25	20	0.15	6	3	3	103.98	94.97	2.62	2.65	3.6	2.33	5	3.24	-3.87	0.0474	0.000136	Soluble	-4.3	0.0176	5.06e-05	Moderately soluble	-7.73	6.55e-06	1.88e-08	Poorly soluble	High	No	Yes	No	Yes	Yes	Yes	Yes	-6.54	0	0	0	0	0	0.55	0	0	0	3.28
ZINC000040893573	NC[C@@H](CNc1ccc(-c2ccnc3[nH]ccc23)s1)c1ccccc1	C20H20N4S	348.46	25	20	0.15	6	2	3	105.52	94.97	2.84	4.33	4.26	2.6	5	3.81	-4.92	0.00415	1.19e-05	Moderately soluble	-6.04	0.000319	9.15e-07	Poorly soluble	-7.73	6.55e-06	1.88e-08	Poorly soluble	High	No	Yes	No	Yes	Yes	Yes	Yes	-5.35	0	0	0	0	0	0.55	0	0	1	3.38
ZINC000040893576	NC[C@H](CNc1ccc(-c2ccnc3[nH]ccc23)s1)c1ccccc1	C20H20N4S	348.46	25	20	0.15	6	2	3	105.52	94.97	2.74	4.33	4.26	2.6	5	3.78	-4.92	0.00415	1.19e-05	Moderately soluble	-6.04	0.000319	9.15e-07	Poorly soluble	-7.73	6.55e-06	1.88e-08	Poorly soluble	High	No	Yes	No	Yes	Yes	Yes	Yes	-5.35	0	0	0	0	0	0.55	0	0	1	3.38
ZINC000040894081	CN(C)C[C@H](NC(=O)c1cc(Br)c(-c2ccnc3[nH]ccc23)s1)c1ccccc1	C22H21BrN4OS	469.4	29	20	0.18	7	3	2	121.91	89.26	3.27	4.52	4.76	3.14	5.61	4.26	-5.65	0.00106	2.26e-06	Moderately soluble	-6.12	0.000359	7.65e-07	Poorly soluble	-8.49	1.53e-06	3.27e-09	Poorly soluble	High	No	Yes	Yes	Yes	Yes	Yes	Yes	-5.95	0	0	0	0	0	0.55	0	0	2	3.78
ZINC000040894083	CN(C)C[C@@H](NC(=O)c1cc(Br)c(-c2ccnc3[nH]ccc23)s1)c1ccccc1	C22H21BrN4OS	469.4	29	20	0.18	7	3	2	121.91	89.26	3.29	4.52	4.76	3.14	5.61	4.26	-5.65	0.00106	2.26e-06	Moderately soluble	-6.12	0.000359	7.65e-07	Poorly soluble	-8.49	1.53e-06	3.27e-09	Poorly soluble	High	No	Yes	Yes	Yes	Yes	Yes	Yes	-5.95	0	0	0	0	0	0.55	0	0	2	3.78
ZINC000040894905	NCC[C@@H](NC(=O)c1cc(Br)c(-c2ccnc3[nH]ccc23)s1)c1ccccc1	C21H19BrN4OS	455.37	28	20	0.14	7	3	3	116.91	112.04	3.02	3.9	4.55	2.93	5.6	4	-5.19	0.00296	6.5e-06	Moderately soluble	-5.95	0.00051	1.12e-06	Moderately soluble	-8.44	1.67e-06	3.67e-09	Poorly soluble	High	No	Yes	Yes	Yes	Yes	Yes	Yes	-6.31	0	0	0	0	0	0.55	0	0	2	3.65
ZINC000040894908	NCC[C@H](NC(=O)c1cc(Br)c(-c2ccnc3[nH]ccc23)s1)c1ccccc1	C21H19BrN4OS	455.37	28	20	0.14	7	3	3	116.91	112.04	2.76	3.9	4.55	2.93	5.6	3.95	-5.19	0.00296	6.5e-06	Moderately soluble	-5.95	0.00051	1.12e-06	Moderately soluble	-8.44	1.67e-06	3.67e-09	Poorly soluble	High	No	Yes	Yes	Yes	Yes	Yes	Yes	-6.31	0	0	0	0	0	0.55	0	0	2	3.65
ZINC000040894970	N[C@H](CNC(=O)c1cc(Br)c(-c2ccnc3[nH]ccc23)s1)c1ccccc1	C20H17BrN4OS	441.34	27	20	0.1	6	3	3	112.1	112.04	2.5	3.54	4.16	2.71	5.21	3.62	-4.96	0.00485	1.1e-05	Moderately soluble	-5.58	0.00117	2.65e-06	Moderately soluble	-8.04	3.98e-06	9.02e-09	Poorly soluble	High	No	Yes	No	Yes	Yes	Yes	Yes	-6.48	0	0	0	0	0	0.55	0	0	2	3.56
ZINC000040894973	N[C@@H](CNC(=O)c1cc(Br)c(-c2ccnc3[nH]ccc23)s1)c1ccccc1	C20H17BrN4OS	441.34	27	20	0.1	6	3	3	112.1	112.04	2.63	3.54	4.16	2.71	5.21	3.65	-4.96	0.00485	1.1e-05	Moderately soluble	-5.58	0.00117	2.65e-06	Moderately soluble	-8.04	3.98e-06	9.02e-09	Poorly soluble	High	No	Yes	No	Yes	Yes	Yes	Yes	-6.48	0	0	0	0	0	0.55	0	0	2	3.56
ZINC000040895313	NC[C@@H](NC(=O)c1cc(-c2ccnc3[nH]ccc23)cs1)c1ccccc1	C20H18N4OS	362.45	26	20	0.1	6	3	3	104.4	112.04	2.29	2.82	3.4	2.11	4.54	3.03	-4.04	0.0333	9.18e-05	Moderately soluble	-4.83	0.00536	1.48e-05	Moderately soluble	-7.26	1.99e-05	5.48e-08	Poorly soluble	High	No	Yes	No	Yes	Yes	Yes	Yes	-6.51	0	0	0	0	0	0.55	0	0	1	3.24
ZINC000040895316	NC[C@H](NC(=O)c1cc(-c2ccnc3[nH]ccc23)cs1)c1ccccc1	C20H18N4OS	362.45	26	20	0.1	6	3	3	104.4	112.04	2.08	2.82	3.4	2.11	4.54	2.99	-4.04	0.0333	9.18e-05	Moderately soluble	-4.83	0.00536	1.48e-05	Moderately soluble	-7.26	1.99e-05	5.48e-08	Poorly soluble	High	No	Yes	No	Yes	Yes	Yes	Yes	-6.51	0	0	0	0	0	0.55	0	0	1	3.24
ZINC000040895341	CNC[C@H](NC(=O)c1cc(Br)c(-c2ccnc3[nH]ccc23)s1)c1ccccc1	C21H19BrN4OS	455.37	28	20	0.14	7	3	3	117.01	98.05	3.16	4.06	4.42	2.93	5.67	4.05	-5.29	0.00235	5.16e-06	Moderately soluble	-5.82	0.000684	1.5e-06	Moderately soluble	-8.83	6.75e-07	1.48e-09	Poorly soluble	High	No	Yes	Yes	Yes	Yes	Yes	Yes	-6.2	0	0	0	0	0	0.55	0	0	2	3.67
ZINC000040895343	CNC[C@@H](NC(=O)c1cc(Br)c(-c2ccnc3[nH]ccc23)s1)c1ccccc1	C21H19BrN4OS	455.37	28	20	0.14	7	3	3	117.01	98.05	3.35	4.06	4.42	2.93	5.67	4.08	-5.29	0.00235	5.16e-06	Moderately soluble	-5.82	0.000684	1.5e-06	Moderately soluble	-8.83	6.75e-07	1.48e-09	Poorly soluble	High	No	Yes	Yes	Yes	Yes	Yes	Yes	-6.2	0	0	0	0	0	0.55	0	0	2	3.67
ZINC000040895428	NC[C@H](NC(=O)c1ccc(-c2ccnc3[nH]ccc23)s1)c1ccccc1	C20H18N4OS	362.45	26	20	0.1	6	3	3	104.4	112.04	2.32	2.85	3.4	2.11	4.54	3.04	-4.06	0.0319	8.79e-05	Moderately soluble	-4.86	0.00499	1.38e-05	Moderately soluble	-7.26	1.99e-05	5.48e-08	Poorly soluble	High	No	Yes	No	Yes	Yes	Yes	Yes	-6.49	0	0	0	0	0	0.55	0	0	1	3.29
ZINC000040895785	NC[C@@H](NC(=O)c1ccc(-c2c[nH]c3ncccc23)s1)c1ccccc1	C20H18N4OS	362.45	26	20	0.1	6	3	3	104.4	112.04	2.4	2.85	3.4	2.11	4.54	3.06	-4.06	0.0319	8.79e-05	Moderately soluble	-4.86	0.00499	1.38e-05	Moderately soluble	-7.26	1.99e-05	5.48e-08	Poorly soluble	High	No	Yes	No	Yes	Yes	Yes	Yes	-6.49	0	0	0	0	0	0.55	0	0	1	3.48
ZINC000040895788	NC[C@H](NC(=O)c1ccc(-c2c[nH]c3ncccc23)s1)c1ccccc1	C20H18N4OS	362.45	26	20	0.1	6	3	3	104.4	112.04	2.43	2.85	3.4	2.11	4.54	3.06	-4.06	0.0319	8.79e-05	Moderately soluble	-4.86	0.00499	1.38e-05	Moderately soluble	-7.26	1.99e-05	5.48e-08	Poorly soluble	High	No	Yes	No	Yes	Yes	Yes	Yes	-6.49	0	0	0	0	0	0.55	0	0	1	3.48
ZINC000040896689	NC[C@@H](NC(=O)c1cc(C2CC2)c(-c2ccnc3[nH]ccc23)s1)c1ccccc1	C23H22N4OS	402.51	29	20	0.22	7	3	3	116.87	112.04	2.91	3.76	4.21	2.76	5.5	3.83	-4.75	0.00711	1.77e-05	Moderately soluble	-5.81	0.000629	1.56e-06	Moderately soluble	-7.83	5.98e-06	1.49e-08	Poorly soluble	High	No	Yes	Yes	Yes	Yes	Yes	Yes	-6.09	0	0	0	0	0	0.55	0	0	2	3.72
ZINC000040896692	NC[C@H](NC(=O)c1cc(C2CC2)c(-c2ccnc3[nH]ccc23)s1)c1ccccc1	C23H22N4OS	402.51	29	20	0.22	7	3	3	116.87	112.04	2.97	3.76	4.21	2.76	5.5	3.84	-4.75	0.00711	1.77e-05	Moderately soluble	-5.81	0.000629	1.56e-06	Moderately soluble	-7.83	5.98e-06	1.49e-08	Poorly soluble	High	No	Yes	Yes	Yes	Yes	Yes	Yes	-6.09	0	0	0	0	0	0.55	0	0	2	3.72
ZINC000040897033	NCCC[C@@H](NC(=O)c1cc(Br)c(-c2ccnc3[nH]ccc23)s1)c1ccccc1	C22H21BrN4OS	469.4	29	20	0.18	8	3	3	121.72	112.04	3.23	4.26	4.94	3.14	5.99	4.31	-5.42	0.0018	3.83e-06	Moderately soluble	-6.32	0.000222	4.74e-07	Poorly soluble	-8.83	7.01e-07	1.49e-09	Poorly soluble	High	No	Yes	Yes	Yes	Yes	Yes	Yes	-6.14	0	0	0	0	0	0.55	0	0	3	3.73
ZINC000040897036	NCCC[C@H](NC(=O)c1cc(Br)c(-c2ccnc3[nH]ccc23)s1)c1ccccc1	C22H21BrN4OS	469.4	29	20	0.18	8	3	3	121.72	112.04	3.09	4.26	4.94	3.14	5.99	4.28	-5.42	0.0018	3.83e-06	Moderately soluble	-6.32	0.000222	4.74e-07	Poorly soluble	-8.83	7.01e-07	1.49e-09	Poorly soluble	High	No	Yes	Yes	Yes	Yes	Yes	Yes	-6.14	0	0	0	0	0	0.55	0	0	3	3.73
ZINC000040897099	NC[C@@H](NC(=O)c1cc(-c2cn[nH]c2)c(-c2ccnc3[nH]ccc23)s1)c1ccccc1	C23H20N6OS	428.51	31	25	0.09	7	4	4	121.99	140.72	2	2.77	3.79	1.79	5.04	3.08	-4.38	0.018	4.2e-05	Moderately soluble	-5.38	0.00178	4.16e-06	Moderately soluble	-8.56	1.18e-06	2.75e-09	Poorly soluble	Low	No	Yes	No	Yes	Yes	Yes	Yes	-6.95	0	0	1	1	0	0.55	0	0	1	3.84
ZINC000040897102	NC[C@H](NC(=O)c1cc(-c2cn[nH]c2)c(-c2ccnc3[nH]ccc23)s1)c1ccccc1	C23H20N6OS	428.51	31	25	0.09	7	4	4	121.99	140.72	1.97	2.77	3.79	1.79	5.04	3.07	-4.38	0.018	4.2e-05	Moderately soluble	-5.38	0.00178	4.16e-06	Moderately soluble	-8.56	1.18e-06	2.75e-09	Poorly soluble	Low	No	Yes	No	Yes	Yes	Yes	Yes	-6.95	0	0	1	1	0	0.55	0	0	1	3.84
ZINC000040898088	O=C1C[C@H]2O[C@@H](c3cccc(O)c3)C3=C(C(=O)c4ccccc4C3=O)[C@H]2O1	C21H14O6	362.33	27	12	0.19	1	6	1	92.93	89.9	1.74	1.73	2.2	1.09	2.96	1.94	-3.44	0.132	0.000364	Soluble	-3.23	0.211	0.000583	Soluble	-5.21	0.00225	6.21e-06	Moderately soluble	High	No	No	Yes	No	No	No	No	-7.28	0	0	0	0	0	0.55	1	0	1	4.39
ZINC000040913909	CCC[C@H]1O[C@@H]2CC(=O)O[C@@H]2C2=C1C(=O)c1c(OC)cccc1C2=O	C19H18O6	342.34	25	6	0.42	3	6	0	87.33	78.9	2.52	1.65	2.25	0.87	3.21	2.1	-2.98	0.357	0.00104	Soluble	-2.92	0.411	0.0012	Soluble	-4.6	0.00852	2.49e-05	Moderately soluble	High	No	No	No	No	No	No	Yes	-7.22	0	0	0	0	0	0.55	1	0	0	4.49
ZINC000040914347	NC[C@@H](C(=O)Nc1cc(Br)c(-c2ccnc3[nH]ccc23)s1)c1ccccc1	C20H17BrN4OS	441.34	27	20	0.1	6	3	3	113.42	112.04	2.38	4.1	4.54	2.71	5.21	3.79	-5.31	0.00215	4.88e-06	Moderately soluble	-6.16	0.000306	6.94e-07	Poorly soluble	-8.04	3.98e-06	9.02e-09	Poorly soluble	High	No	Yes	No	Yes	Yes	Yes	Yes	-6.08	0	0	0	0	0	0.55	0	0	2	3.64
ZINC000040914349	NC[C@H](C(=O)Nc1cc(Br)c(-c2ccnc3[nH]ccc23)s1)c1ccccc1	C20H17BrN4OS	441.34	27	20	0.1	6	3	3	113.42	112.04	2.44	4.1	4.54	2.71	5.21	3.8	-5.31	0.00215	4.88e-06	Moderately soluble	-6.16	0.000306	6.94e-07	Poorly soluble	-8.04	3.98e-06	9.02e-09	Poorly soluble	High	No	Yes	No	Yes	Yes	Yes	Yes	-6.08	0	0	0	0	0	0.55	0	0	2	3.64
ZINC000040914633	O=C1C[C@H]2OCC3=C(C(=O)c4ccccc4C3=O)[C@H]2O1	C15H10O5	270.24	20	6	0.27	0	5	0	66.42	69.67	1.6	0.39	1.08	0.45	2.33	1.17	-1.98	2.81	0.0104	Very soluble	-1.42	10.3	0.0381	Very soluble	-3.54	0.0772	0.000286	Soluble	High	No	No	Yes	No	No	No	No	-7.67	0	0	0	0	0	0.55	1	0	0	3.84
ZINC000040915602	Nc1ccc([C@@H]2O[C@@H]3CC(=O)O[C@@H]3C3=C2C(=O)c2ccccc2C3=O)cc1	C21H15NO5	361.35	27	12	0.19	1	5	1	95.31	95.69	1.84	1.4	2.08	1.09	2.72	1.83	-3.23	0.215	0.000595	Soluble	-3.01	0.35	0.000969	Soluble	-5.42	0.00136	3.77e-06	Moderately soluble	High	No	Yes	Yes	No	No	No	Yes	-7.51	0	0	0	0	0	0.55	1	1	1	4.38
ZINC000040915604	CC1(C)O[C@@H]2CC(=O)O[C@@H]2C2=C1C(=O)c1ccccc1C2=O	C17H14O5	298.29	22	6	0.35	0	5	0	76.07	69.67	2.05	0.98	1.86	0.94	2.89	1.74	-2.51	0.925	0.0031	Soluble	-2.03	2.78	0.00931	Soluble	-4.3	0.0151	5.05e-05	Moderately soluble	High	Yes	No	Yes	Yes	No	No	No	-7.42	0	0	0	0	0	0.55	1	0	0	4.07
ZINC000040918421	CCC[C@H]1O[C@@H]2CC(=O)O[C@@H]2C2=C1C(=O)c1ccccc1C2=O	C18H16O5	312.32	23	6	0.39	2	5	0	80.84	69.67	2.24	1.68	2.25	1.18	3.16	2.1	-2.9	0.397	0.00127	Soluble	-2.76	0.546	0.00175	Soluble	-4.49	0.01	3.21e-05	Moderately soluble	High	Yes	No	Yes	Yes	No	No	No	-7.01	0	0	0	0	0	0.55	1	0	0	4.36
ZINC000040939712	NS(=O)(=O)c1ccc(-c2cc3ccncc3cc2OC2CCNCC2)cc1	C20H21N3O3S	383.46	27	16	0.25	4	6	2	108.5	102.69	2.33	2.39	3.38	1.1	2.28	2.3	-3.9	0.0485	0.000127	Soluble	-4.19	0.0249	6.49e-05	Moderately soluble	-6.67	8.22e-05	2.14e-07	Poorly soluble	High	No	Yes	Yes	No	Yes	Yes	Yes	-6.94	0	0	0	0	0	0.55	0	0	1	2.65
ZINC000040943595	O=C(Nc1ccc(-c2ccncc2)cc1)[C@H]1COc2ccccc2O1	C20H16N2O3	332.35	25	18	0.1	4	4	1	94.38	60.45	2.61	3.27	3.34	1.81	3.31	2.87	-4.23	0.0196	5.9e-05	Moderately soluble	-4.21	0.0203	6.11e-05	Moderately soluble	-6.83	4.89e-05	1.47e-07	Poorly soluble	High	Yes	Yes	Yes	Yes	Yes	Yes	Yes	-6.01	0	0	0	0	0	0.55	0	0	0	2.99
ZINC000040943597	O=C(Nc1ccc(-c2ccncc2)cc1)[C@@H]1COc2ccccc2O1	C20H16N2O3	332.35	25	18	0.1	4	4	1	94.38	60.45	2.56	3.27	3.34	1.81	3.31	2.86	-4.23	0.0196	5.9e-05	Moderately soluble	-4.21	0.0203	6.11e-05	Moderately soluble	-6.83	4.89e-05	1.47e-07	Poorly soluble	High	Yes	Yes	Yes	Yes	Yes	Yes	Yes	-6.01	0	0	0	0	0	0.55	0	0	0	2.99
ZINC000040943599	O=C(Nc1ccc(-c2c[nH]cn2)cc1)[C@H]1COc2ccccc2O1	C18H15N3O3	321.33	24	17	0.11	4	4	2	88.73	76.24	1.86	2.38	2.66	0.98	2.83	2.14	-3.59	0.0823	0.000256	Soluble	-3.62	0.0767	0.000239	Soluble	-6.05	0.000287	8.93e-07	Poorly soluble	High	Yes	Yes	Yes	Yes	Yes	Yes	Yes	-6.57	0	0	0	0	0	0.55	0	0	0	3.1
ZINC000040943601	O=C(Nc1ccc(-c2c[nH]cn2)cc1)[C@@H]1COc2ccccc2O1	C18H15N3O3	321.33	24	17	0.11	4	4	2	88.73	76.24	2.02	2.38	2.66	0.98	2.83	2.18	-3.59	0.0823	0.000256	Soluble	-3.62	0.0767	0.000239	Soluble	-6.05	0.000287	8.93e-07	Poorly soluble	High	Yes	Yes	Yes	Yes	Yes	Yes	Yes	-6.57	0	0	0	0	0	0.55	0	0	0	3.1
ZINC000040943603	COc1cc(-c2cn[nH]c2)ccc1NC(=O)[C@@H]1COc2ccccc2O1	C19H17N3O4	351.36	26	17	0.16	5	5	2	95.22	85.47	2.46	2.47	2.67	1.09	2.87	2.31	-3.73	0.0657	0.000187	Soluble	-3.91	0.0433	0.000123	Soluble	-6.16	0.000244	6.93e-07	Poorly soluble	High	No	Yes	Yes	No	Yes	Yes	Yes	-6.69	0	0	0	0	0	0.55	0	0	1	3.29
ZINC000040943605	COc1cc(-c2cn[nH]c2)ccc1NC(=O)[C@H]1COc2ccccc2O1	C19H17N3O4	351.36	26	17	0.16	5	5	2	95.22	85.47	2.28	2.47	2.67	1.09	2.87	2.28	-3.73	0.0657	0.000187	Soluble	-3.91	0.0433	0.000123	Soluble	-6.16	0.000244	6.93e-07	Poorly soluble	High	No	Yes	Yes	No	Yes	Yes	Yes	-6.69	0	0	0	0	0	0.55	0	0	1	3.29
ZINC000040949447	C[C@H]1O[C@@H]2CC(=O)O[C@@H]2C2=C1C(=O)c1ccccc1C2=O	C16H12O5	284.26	21	6	0.31	0	5	0	71.23	69.67	1.91	0.79	1.47	0.7	2.41	1.45	-2.31	1.39	0.00488	Soluble	-1.83	4.17	0.0147	Very soluble	-3.7	0.0572	0.000201	Soluble	High	Yes	No	Yes	No	No	No	No	-7.47	0	0	0	0	0	0.55	1	0	0	4.15
ZINC000040950836	O=C1C[C@H]2O[C@H](c3ccsc3)C3=C(C(=O)c4ccccc4C3=O)[C@H]2O1	C19H12O5S	352.36	25	11	0.21	1	5	0	88.78	97.91	2.11	1.77	2.55	1.22	4.09	2.35	-3.4	0.14	0.000399	Soluble	-3.44	0.127	0.00036	Soluble	-5.06	0.00308	8.75e-06	Moderately soluble	High	No	No	Yes	Yes	No	No	Yes	-7.19	0	0	0	0	0	0.55	1	0	1	4.38
ZINC000040952852	CCn1c(-c2nonc2N)nc2c(-c3ccccc3)ncc(OCCCN)c21	C19H21N7O2	379.42	28	20	0.26	7	7	2	105.54	130.9	3.19	0.9	2.49	0.93	1.82	1.87	-2.83	0.566	0.00149	Soluble	-3.23	0.221	0.000583	Soluble	-6.18	0.000248	6.55e-07	Poorly soluble	High	No	Yes	Yes	No	No	No	Yes	-7.98	0	0	0	0	0	0.55	0	0	1	3.62
ZINC000040952854	CCn1c(-c2nonc2N)nc2c(-c3ccc[nH]3)ncc(OCCCN)c21	C17H20N8O2	368.39	27	19	0.29	7	7	3	99.89	146.69	2.83	-0.28	1.81	-0.27	1.35	1.09	-2.01	3.63	0.00985	Soluble	-2.34	1.68	0.00456	Soluble	-5.4	0.00146	3.95e-06	Moderately soluble	Low	No	Yes	Yes	No	No	No	Yes	-8.75	0	0	1	1	0	0.55	0	0	1	3.59
ZINC000040953175	O=C1C[C@H]2O[C@H](COCc3ccccc3)C3=C(C(=O)c4ccccc4C3=O)[C@H]2O1	C23H18O6	390.39	29	12	0.26	4	6	0	101.61	78.9	2.66	1.77	2.51	1.26	3.75	2.39	-3.42	0.149	0.000382	Soluble	-3.04	0.352	0.000902	Soluble	-6.31	0.000191	4.9e-07	Poorly soluble	High	No	No	Yes	Yes	Yes	No	Yes	-7.42	0	0	0	0	0	0.55	1	0	1	4.62
ZINC000040953177	O=C1C[C@H]2O[C@@H](c3ccc(O)cc3)C3=C(C(=O)c4ccccc4C3=O)[C@H]2O1	C21H14O6	362.33	27	12	0.19	1	6	1	92.93	89.9	1.88	1.73	2.2	1.09	2.96	1.97	-3.44	0.132	0.000364	Soluble	-3.23	0.211	0.000583	Soluble	-5.21	0.00225	6.21e-06	Moderately soluble	High	No	No	Yes	No	No	No	No	-7.28	0	0	0	0	0	0.55	1	0	1	4.37
ZINC000040953225	CCn1c(-c2nonc2N)nc2c(C#CC(C)(C)O)ncc(OCCCNCCc3ccc(OC)cc3)c21	C27H33N7O4	519.6	38	20	0.41	11	9	3	144.35	146.37	4.86	1.81	2.9	1.31	3.52	2.88	-3.87	0.0709	0.000136	Soluble	-4.5	0.0163	3.14e-05	Moderately soluble	-7.72	9.81e-06	1.89e-08	Poorly soluble	Low	No	Yes	No	Yes	Yes	Yes	Yes	-8.18	2	3	2	1	0	0.17	0	1	2	4.59
ZINC000040953834	CCn1c(-c2nonc2N)nc2cncc(OC3CCNCC3)c21	C15H19N7O2	329.36	24	14	0.47	4	7	2	91.62	116.91	2.79	-0.06	0.84	0.2	0.58	0.87	-2.01	3.2	0.00973	Soluble	-1.94	3.75	0.0114	Very soluble	-4.06	0.029	8.79e-05	Moderately soluble	High	No	Yes	Yes	No	No	No	Yes	-8.35	0	0	0	0	0	0.55	0	0	0	3.3
ZINC000040954431	CCn1c(-c2nonc2N)nc2c(C#CC(C)(C)O)ncc(OCC3CCNCC3)c21	C21H27N7O3	425.48	31	14	0.52	5	8	3	119.98	137.14	3.86	0.27	1.29	0.76	1.73	1.58	-2.65	0.948	0.00223	Soluble	-2.71	0.827	0.00194	Soluble	-4.72	0.00816	1.92e-05	Moderately soluble	High	No	Yes	No	No	No	No	No	-8.7	0	0	0	1	0	0.55	0	1	1	4.11
ZINC000040954529	CCn1c(-c2nonc2N)nc2c(C#CCN)ncc(OCCCN)c21	C16H20N8O2	356.38	26	14	0.38	6	8	3	95.56	156.92	2.74	-1.48	0.21	-0.4	0.38	0.29	-1.12	27.1	0.0759	Very soluble	-1.31	17.4	0.0489	Very soluble	-3.81	0.0547	0.000153	Soluble	Low	No	Yes	No	No	No	No	No	-9.52	0	0	1	1	1	0.55	0	1	1	3.71
ZINC000040954793	CCn1c(-c2nonc2N)nc2cncc(OCC3CCNCC3)c21	C16H21N7O2	343.38	25	14	0.5	5	7	2	96.42	116.91	2.99	0.13	1.09	0.44	0.94	1.12	-2.14	2.51	0.00732	Soluble	-2.14	2.48	0.00722	Soluble	-4.45	0.0121	3.53e-05	Moderately soluble	High	No	Yes	Yes	No	No	No	Yes	-8.3	0	0	0	0	0	0.55	0	0	0	3.44
ZINC000040955526	CCn1c(-c2nonc2N)nc2c(C#CCO)ncc(OCCCN)c21	C16H19N7O3	357.37	26	14	0.38	6	8	3	94.01	151.13	2.87	-1.22	0.24	-0.4	0.62	0.42	-1.29	18.3	0.0513	Very soluble	-1.46	12.4	0.0348	Very soluble	-3.6	0.0904	0.000253	Soluble	Low	No	Yes	No	No	No	No	No	-9.35	0	0	1	1	1	0.55	0	1	1	3.67
ZINC000040956030	CCn1c(-c2nonc2N)nc2c(C#CCCO)ncc(OCCCN)c21	C17H21N7O3	371.39	27	14	0.41	7	8	3	98.82	151.13	2.98	-0.76	0.63	-0.16	1.01	0.74	-1.59	9.64	0.026	Very soluble	-1.94	4.3	0.0116	Very soluble	-3.99	0.0379	0.000102	Soluble	Low	No	Yes	No	No	No	No	No	-9.11	0	0	1	1	1	0.55	0	1	1	3.76
ZINC000040956511	CCn1c(-c2nonc2N)nc2c(C#CC(C)(C)O)ncc(OC3CCNCC3)c21	C20H25N7O3	411.46	30	14	0.5	4	8	3	115.17	137.14	3.65	0.08	1.04	0.54	1.34	1.33	-2.52	1.23	0.003	Soluble	-2.51	1.26	0.00306	Soluble	-4.33	0.0195	4.73e-05	Moderately soluble	High	No	Yes	No	No	No	No	No	-8.75	0	0	0	1	0	0.55	0	1	1	3.99
ZINC000040957339	CCn1c(-c2nonc2N)nc2cncc(C(=O)N[C@@H]3CCCNC3)c21	C16H20N8O2	356.38	26	14	0.44	5	7	3	98.12	136.78	2.51	-0.75	0.19	0	0.17	0.42	-1.65	8.06	0.0226	Very soluble	-1.65	8.07	0.0226	Very soluble	-4.3	0.0179	5.02e-05	Moderately soluble	High	No	Yes	Yes	No	No	No	No	-9.01	0	0	0	1	0	0.55	0	0	1	3.64
ZINC000040957342	CCn1c(-c2nonc2N)nc2cncc(C(=O)N[C@H]3CCCNC3)c21	C16H20N8O2	356.38	26	14	0.44	5	7	3	98.12	136.78	2.35	-0.75	0.19	0	0.17	0.39	-1.65	8.06	0.0226	Very soluble	-1.65	8.07	0.0226	Very soluble	-4.3	0.0179	5.02e-05	Moderately soluble	High	No	Yes	Yes	No	No	No	No	-9.01	0	0	0	1	0	0.55	0	0	1	3.64
ZINC000040957449	CCn1c(-c2nonc2N)nc2cncc(C(=O)N3CC[C@@H](N)C3)c21	C15H18N8O2	342.36	25	14	0.4	4	7	2	93.31	141.98	2.22	-1.44	-0.12	-0.25	-0.57	-0.03	-1.21	21.3	0.0623	Very soluble	-1.04	31.3	0.0915	Very soluble	-2.9	0.428	0.00125	Soluble	Low	No	Yes	Yes	No	No	No	No	-9.41	0	0	1	1	0	0.55	0	0	0	3.53
ZINC000040957571	CCn1c(-c2nonc2N)nc2c(C#CC3CC3)ncc(OCCCN)c21	C18H21N7O2	367.41	27	14	0.44	6	7	2	100.35	130.9	3.37	0.58	1.6	0.85	1.67	1.61	-2.47	1.24	0.00338	Soluble	-2.9	0.46	0.00125	Soluble	-4.36	0.0161	4.38e-05	Moderately soluble	High	No	Yes	No	No	No	No	Yes	-8.13	0	0	0	0	0	0.55	0	1	1	3.77
ZINC000040972249	CCn1c(-c2nonc2N)nc2c(C#CC(C)(C)O)ncc(OCC[C@@H](N)Cc3ccccc3)c21	C25H29N7O3	475.54	35	20	0.36	8	8	3	132.96	151.13	4.14	1.39	2.63	1.39	2.78	2.47	-3.56	0.131	0.000276	Soluble	-4.17	0.0323	6.8e-05	Moderately soluble	-6.47	0.00016	3.36e-07	Poorly soluble	Low	No	Yes	No	No	No	No	Yes	-8.21	0	1	1	1	1	0.55	0	1	2	4.8
ZINC000040974547	NC[C@H](Cc1ccc(F)cc1)NC(=O)c1cc(Br)c(-c2ccnc3[nH]ccc23)s1	C21H18BrFN4OS	473.36	29	20	0.14	7	4	3	116.87	112.04	2.71	4.14	4.91	3.03	6.02	4.16	-5.43	0.00175	3.7e-06	Moderately soluble	-6.2	0.000299	6.31e-07	Poorly soluble	-8.7	9.53e-07	2.01e-09	Poorly soluble	High	No	Yes	Yes	Yes	Yes	Yes	Yes	-6.25	0	0	0	0	0	0.55	0	0	2	3.66
ZINC000040974950	NC[C@H](Cc1ccncc1)NC(=O)c1cc(Br)c(-c2ccnc3[nH]ccc23)s1	C20H18BrN5OS	456.36	28	20	0.15	7	4	3	114.71	124.93	2.3	2.97	3.75	1.9	5.04	3.19	-4.61	0.0113	2.47e-05	Moderately soluble	-5.26	0.00253	5.54e-06	Moderately soluble	-8.06	3.96e-06	8.67e-09	Poorly soluble	High	No	Yes	Yes	Yes	Yes	Yes	Yes	-6.98	0	0	0	0	0	0.55	0	0	1	3.67
ZINC000040974952	COc1ccc(C[C@@H](CN)NC(=O)c2cc(Br)c(-c3ccnc4[nH]ccc34)s2)cc1	C22H21BrN4O2S	485.4	30	20	0.18	8	4	3	123.4	121.27	2.55	4.01	4.36	2.33	5.66	3.78	-5.34	0.00221	4.56e-06	Moderately soluble	-6.26	0.000267	5.51e-07	Poorly soluble	-8.53	1.43e-06	2.94e-09	Poorly soluble	High	No	Yes	Yes	Yes	Yes	Yes	Yes	-6.41	0	1	0	0	0	0.55	0	0	3	3.73
ZINC000040975216	NC[C@H](Cc1ccccc1F)NC(=O)c1cc(Br)c(-c2ccnc3[nH]ccc23)s1	C21H18BrFN4OS	473.36	29	20	0.14	7	4	3	116.87	112.04	2.88	4.14	4.91	3.03	6.02	4.2	-5.43	0.00175	3.7e-06	Moderately soluble	-6.2	0.000299	6.31e-07	Poorly soluble	-8.7	9.53e-07	2.01e-09	Poorly soluble	High	No	Yes	Yes	Yes	Yes	Yes	Yes	-6.25	0	0	0	0	0	0.55	0	0	2	3.7
ZINC000042803376	CN1CCN(c2ccc3nc(-c4ccccc4)c(-c4ccc(CN5CCC(c6n[nH]c(-c7ccc(N)nc7)n6)CC5)cc4)nc3n2)CC1	C37H39N11	637.78	48	33	0.3	7	8	2	200.23	128.87	4.27	4.48	3.97	2.94	4.43	4.02	-6.66	0.000138	2.17e-07	Poorly soluble	-6.91	7.91e-05	1.24e-07	Poorly soluble	-11.47	2.15e-09	3.37e-12	Insoluble	Low	No	Yes	Yes	Yes	Yes	No	Yes	-7.01	2	3	0	0	2	0.17	0	0	2	5.27
ZINC000042803732	Sc1nnc2c3cc(-c4ccccc4)c(-c4ccc(CN5CCC(c6n[nH]c(-c7ccccn7)n6)CC5)cc4)nc3ccn12	C34H29N9S	595.72	44	36	0.18	6	7	1	177.77	139.58	3.67	6.02	5.93	4.21	5.37	5.04	-7.54	1.74e-05	2.91e-08	Poorly soluble	-8.73	1.11e-06	1.86e-09	Poorly soluble	-11.89	7.67e-10	1.29e-12	Insoluble	Low	No	No	No	No	Yes	No	No	-5.66	2	4	0	2	2	0.17	0	1	2	4.64
ZINC000042804464	OC1CCN(c2ncc3cc(-c4ccccc4)c(-c4ccc(CN5CCC(c6n[nH]c(-c7ccccn7)n6)CC5)cc4)nc3n2)CC1	C37H37N9O	623.75	47	33	0.3	7	8	2	190.17	119.84	4.17	5.22	4.97	3.43	5.27	4.61	-7.05	5.52e-05	8.84e-08	Poorly soluble	-7.48	2.04e-05	3.28e-08	Poorly soluble	-11.6	1.57e-09	2.51e-12	Insoluble	Low	No	No	Yes	No	Yes	No	Yes	-6.4	1	3	0	0	3	0.55	0	0	2	5.41
ZINC000042806495	C[C@@H]1CN(c2ncc3cc(-c4ccccc4)c(-c4ccc(CN5CCC(c6n[nH]c(-c7ccccn7)n6)CC5)cc4)nc3n2)CCN1	C37H38N10	622.76	47	33	0.3	7	8	2	195.73	111.64	4.84	5.13	4.42	3.43	5.31	4.63	-6.99	6.36e-05	1.02e-07	Poorly soluble	-7.22	3.76e-05	6.04e-08	Poorly soluble	-12.34	2.87e-10	4.61e-13	Insoluble	High	No	No	Yes	No	Yes	No	Yes	-6.46	1	3	0	0	3	0.55	0	0	2	5.45
ZINC000042807882	Nc1ccc(-c2nc(C3CCN(Cc4ccc(-c5nc6cc[nH]c(=O)c6cc5-c5ccccc5)cc4)CC3)n[nH]2)cn1	C33H30N8O	554.64	42	33	0.18	6	6	3	169	129.47	3.18	4	4.87	3.01	5.68	4.15	-5.98	0.000575	1.04e-06	Moderately soluble	-6.42	0.00021	3.79e-07	Poorly soluble	-11.69	1.12e-09	2.03e-12	Insoluble	Low	No	No	Yes	No	Yes	No	No	-6.84	1	3	0	0	0	0.55	0	0	2	4.64
ZINC000042808310	CN1CCN(c2ncc3cc(-c4ccccc4)c(-c4ccc(CN5CCC(c6n[nH]c(-c7ccccn7)n6)CC5)cc4)nc3n2)CC1	C37H38N10	622.76	47	33	0.3	7	8	1	195.82	102.85	4.9	5.16	4.38	3.43	5.15	4.6	-7.01	6.09e-05	9.78e-08	Poorly soluble	-7.07	5.35e-05	8.6e-08	Poorly soluble	-11.85	8.78e-10	1.41e-12	Insoluble	High	No	No	Yes	No	Yes	No	Yes	-6.44	1	3	0	0	3	0.55	0	0	2	5.18
ZINC000042833828	CN(C)CCNc1ncc2cc(-c3ccccc3)c(-c3ccc(CN4CCC(c5n[nH]c(-c6ccccn6)n5)CC4)cc3)nc2n1	C36H38N10	610.75	46	33	0.28	10	8	2	186.18	111.64	4.9	5.25	5.17	3.26	5.42	4.8	-6.81	9.57e-05	1.57e-07	Poorly soluble	-7.34	2.77e-05	4.53e-08	Poorly soluble	-12.67	1.3e-10	2.13e-13	Insoluble	Low	No	No	Yes	No	Yes	No	Yes	-6.3	1	3	0	0	2	0.55	0	0	3	5.14
ZINC000042834035	CN1CCN(c2nccc3nc(-c4ccc(CN5CCC(c6n[nH]c(-c7ccccn7)n6)CC5)cc4)c(-c4ccccc4)cc23)CC1	C38H39N9	621.78	47	33	0.29	7	7	1	198.03	89.96	4.92	5.48	4.98	3.57	5.73	4.93	-7.2	3.88e-05	6.24e-08	Poorly soluble	-7.13	4.64e-05	7.47e-08	Poorly soluble	-12.22	3.7e-10	5.96e-13	Insoluble	High	No	No	Yes	No	Yes	No	No	-6.2	1	3	0	0	3	0.55	0	0	2	5.21
ZINC000042834134	O=c1[nH]nc2c3cc(-c4ccccc4)c(-c4ccc(CN5CCC(c6n[nH]c(-c7ccccn7)n6)CC5)cc4)nc3ccn12	C34H29N9O	579.65	44	36	0.18	6	7	2	173.34	120.75	3.32	4.22	4.93	3.92	5.23	4.32	-6.3	0.000289	4.99e-07	Poorly soluble	-6.47	0.000198	3.42e-07	Poorly soluble	-11.71	1.14e-09	1.96e-12	Insoluble	Low	No	Yes	Yes	Yes	Yes	No	No	-6.84	1	3	0	0	1	0.55	0	0	2	4.69
ZINC000042834404	CN1CCN(c2ccc3nc(-c4ccccc4)c(-c4ccc(CN5CCC(c6n[nH]c(-c7ncccn7)n6)CC5)cc4)nc3n2)CC1	C36H37N11	623.75	47	33	0.31	7	9	1	193.62	115.74	4.44	4.21	3.77	2.49	4.57	3.9	-6.42	0.000239	3.83e-07	Poorly soluble	-6.35	0.000278	4.46e-07	Poorly soluble	-11.48	2.07e-09	3.33e-12	Insoluble	High	No	Yes	Yes	No	Yes	Yes	Yes	-7.12	2	3	0	0	2	0.17	0	0	2	5.1
ZINC000042834928	C[C@H]1CN(c2ncc3cc(-c4ccccc4)c(-c4ccc(CN5CCC(c6n[nH]c(-c7ccccn7)n6)CC5)cc4)nc3n2)CCN1	C37H38N10	622.76	47	33	0.3	7	8	2	195.73	111.64	4.69	5.13	4.42	3.43	5.31	4.6	-6.99	6.36e-05	1.02e-07	Poorly soluble	-7.22	3.76e-05	6.04e-08	Poorly soluble	-12.34	2.87e-10	4.61e-13	Insoluble	High	No	No	Yes	No	Yes	No	Yes	-6.46	1	3	0	0	3	0.55	0	0	2	5.45
ZINC000042835045	Nc1nnc2c3cc(-c4ccccc4)c(-c4ccc(CN5CCC(n6cnc(-c7ccccn7)c6)CC5)cc4)nc3ccn12	C35H31N9	577.68	44	36	0.17	6	6	1	177.06	103.05	4.29	5.09	5.76	3.31	3.9	4.47	-6.84	8.39e-05	1.45e-07	Poorly soluble	-7	5.81e-05	1.01e-07	Poorly soluble	-10.99	5.9e-09	1.02e-11	Insoluble	Low	No	No	No	No	No	No	No	-6.21	1	4	0	0	2	0.55	0	0	2	4.65
ZINC000042835219	ClCc1nnc2c3cc(-c4ccccc4)c(-c4ccc(CN5CCC(c6n[nH]c(-c7ccccn7)n6)CC5)cc4)nc3ccn12	C35H30ClN9	612.13	45	36	0.2	7	7	1	180.28	100.78	4.31	5.96	6.23	4.3	6.13	5.39	-7.52	1.85e-05	3.02e-08	Poorly soluble	-7.85	8.6e-06	1.41e-08	Poorly soluble	-12.78	1.02e-10	1.67e-13	Insoluble	Low	No	No	No	No	Yes	No	No	-5.8	2	4	0	1	3	0.17	0	1	2	4.78
ZINC000042851269	N/C(O)=N/c1nnc2c3cc(-c4ccccc4)c(-c4ccc(CN5CCC(c6n[nH]c(-c7ccccn7)n6)CC5)cc4)nc3ccn12	C35H31N11O	621.69	47	36	0.17	7	9	3	184	159.39	3.91	5	5.14	3.66	4.01	4.35	-6.95	6.99e-05	1.12e-07	Poorly soluble	-8.09	5.09e-06	8.19e-09	Poorly soluble	-10.9	7.75e-09	1.25e-11	Insoluble	Low	No	Yes	Yes	No	No	No	No	-6.54	2	3	1	1	3	0.17	0	2	2	5.1
ZINC000042888099	NC[C@H](Cc1ccccc1C(F)(F)F)NC(=O)c1cc(Br)c(-c2ccnc3[nH]ccc23)s1	C22H18BrF3N4OS	523.37	32	20	0.18	8	6	3	121.91	112.04	3.32	4.92	6.52	3.45	6.68	4.98	-6.12	0.000398	7.6e-07	Poorly soluble	-7.01	5.12e-05	9.78e-08	Poorly soluble	-9.25	2.96e-07	5.66e-10	Poorly soluble	Low	No	Yes	Yes	Yes	Yes	Yes	Yes	-6	1	2	0	1	0	0.55	0	0	3	3.85
ZINC000043154090	N[C@H](CNc1ncc(-c2ccc3cncnc3c2)s1)Cc1ccc(C(F)(F)F)cc1	C21H18F3N5S	429.46	30	21	0.19	7	7	2	111.76	104.96	3.3	4.52	5.72	2.69	5.42	4.33	-5.41	0.00169	3.92e-06	Moderately soluble	-6.45	0.000154	3.58e-07	Poorly soluble	-8.59	1.1e-06	2.56e-09	Poorly soluble	Low	No	Yes	Yes	Yes	Yes	Yes	Yes	-5.71	0	1	0	0	0	0.55	0	0	2	3.7
ZINC000043178353	CCc1c[nH]c2ncnc(N3CC[C@](N)(CNC(=O)c4ccc(F)cc4F)C3)c12	C20H22F2N6O	400.43	29	15	0.35	6	6	3	108.29	99.93	2.76	2.16	2.6	2.25	3.32	2.62	-3.67	0.0856	0.000214	Soluble	-3.89	0.0514	0.000128	Soluble	-6.81	6.23e-05	1.56e-07	Poorly soluble	High	No	Yes	Yes	No	No	Yes	Yes	-7.21	0	0	0	0	0	0.55	0	0	1	3.36
ZINC000043194549	COc1ccc2c(Oc3ccc(NC(=O)c4c(C)n(CC(C)(C)O)n(-c5ccccc5)c4=O)nc3)ccnc2c1	C30H29N5O5	539.58	40	27	0.2	9	7	2	152.2	120.5	3.91	4	4.52	1.94	3.55	3.58	-5.61	0.00132	2.45e-06	Moderately soluble	-6.23	0.000316	5.85e-07	Poorly soluble	-8.66	1.19e-06	2.2e-09	Poorly soluble	High	No	Yes	No	Yes	Yes	Yes	Yes	-6.75	1	2	0	0	0	0.55	0	0	3	4.11
ZINC000043202405	N[C@H](CCc1cc(-c2ccc3cnccc3c2)no1)Cc1ccc(C(F)(F)F)cc1	C23H20F3N3O	411.42	30	21	0.22	7	7	1	108.82	64.94	3.48	4.83	6.56	3.41	5.9	4.84	-5.49	0.00133	3.24e-06	Moderately soluble	-5.93	0.000487	1.18e-06	Moderately soluble	-9.28	2.17e-07	5.27e-10	Poorly soluble	High	No	Yes	Yes	No	No	Yes	Yes	-5.38	0	1	0	1	0	0.55	0	0	2	3.73
ZINC000043202512	COc1ccc(S(=O)(=O)Nc2cc(-c3ccc4nc(NC(C)=O)sc4c3)cnc2Cl)cc1	C21H17ClN4O4S2	488.97	32	21	0.1	7	6	2	125.78	146.9	2.51	3.9	5.48	1.86	3.98	3.54	-5.35	0.00217	4.44e-06	Moderately soluble	-6.68	0.000101	2.07e-07	Poorly soluble	-8.57	1.3e-06	2.67e-09	Poorly soluble	Low	No	No	No	Yes	Yes	No	Yes	-6.51	0	1	1	1	0	0.55	0	1	2	3.47
ZINC000043202641	c1ccc(-c2cc3c(ccn4cnnc34)nc2-c2ccc(CN3CCC(c4n[nH]c(-c5ccccn5)n4)CC3)cc2)cc1	C34H29N9	563.65	43	36	0.18	6	7	1	170.52	100.78	4.1	5.53	5.64	3.54	5.09	4.78	-7.04	5.12e-05	9.08e-08	Poorly soluble	-7.41	2.21e-05	3.93e-08	Poorly soluble	-11.82	8.51e-10	1.51e-12	Insoluble	High	No	No	No	No	Yes	No	No	-5.81	1	4	0	0	2	0.55	0	0	2	4.61
ZINC000043202932	Cc1occc1-c1nc(N)c(OC[C@@H](N)Cc2c[nH]c3ccccc23)cc1-c1cc2c(C)n[nH]c2cn1	C28H27N7O2	493.56	37	29	0.18	7	6	4	144.32	144.66	2.62	3.43	4.92	1.01	5.34	3.46	-5.18	0.00327	6.62e-06	Moderately soluble	-6.15	0.000351	7.11e-07	Poorly soluble	-10.3	2.47e-08	5e-11	Insoluble	Low	No	Yes	No	Yes	Yes	Yes	Yes	-6.88	0	2	1	1	0	0.55	0	0	1	4.64
ZINC000043202934	Cc1occc1-c1nc(N)c(OC[C@@H](N)Cc2c[nH]c3ccccc23)cc1-c1cnc2[nH]nc(C)c2n1	C27H26N8O2	494.55	37	29	0.19	7	7	4	142.11	157.55	2.53	2.79	4.31	0.71	4.76	3.02	-4.78	0.00817	1.65e-05	Moderately soluble	-5.75	0.00087	1.76e-06	Moderately soluble	-9.93	5.84e-08	1.18e-10	Poorly soluble	Low	No	Yes	No	Yes	Yes	Yes	Yes	-7.34	0	2	1	1	1	0.55	0	0	1	4.68
ZINC000043203317	C[C@@]1(C(=O)Nc2ccc(F)nc2)CCCN1c1nc(Nc2cc(C3CC3)[nH]n2)c2cccn2n1	C23H24FN9O	461.49	34	20	0.35	7	6	3	128.22	116.13	2.49	2.93	3.39	2.43	1.84	2.62	-4.52	0.0139	3.02e-05	Moderately soluble	-5.03	0.0043	9.32e-06	Moderately soluble	-6.83	6.84e-05	1.48e-07	Poorly soluble	High	No	Yes	No	Yes	Yes	Yes	Yes	-7.03	0	0	0	0	0	0.55	0	1	1	4.36
ZINC000043204023	NC1(C(=O)N[C@@H](CCO)c2ccc(Cl)cc2)CCN(c2ncnc3[nH]ccc23)CC1	C21H25ClN6O2	428.92	30	15	0.38	7	5	4	118.97	120.16	2.49	1.7	1.44	1.41	2.44	1.9	-3.48	0.143	0.000332	Soluble	-3.84	0.0622	0.000145	Soluble	-6.21	0.000268	6.24e-07	Poorly soluble	High	No	Yes	No	No	No	Yes	Yes	-7.71	0	0	0	0	0	0.55	0	0	1	3.56
ZINC000043206366	C[C@@H]1C[C@@H](O)c2ncnc(N3CCN(C(=O)[C@H](CNC(C)(C)CO)c4ccc(Cl)cc4)CC3)c21	C25H34ClN5O3	488.02	34	12	0.56	8	6	3	139.43	101.82	3.84	1.6	1.38	1.46	2.75	2.2	-3.61	0.121	0.000247	Soluble	-3.35	0.218	0.000447	Soluble	-5.69	0.000996	2.04e-06	Moderately soluble	High	No	Yes	No	No	No	Yes	No	-8.14	0	2	0	0	0	0.55	0	0	2	4.71
ZINC000043206367	C[C@@H]1C[C@@H](O)c2ncnc(N3CCN(C(=O)[C@H](CNC(C)(C)CO)c4ccc(C(F)(F)F)c(F)c4)CC3)c21	C26H33F4N5O3	539.57	38	12	0.58	9	10	3	139.38	101.82	4.11	1.95	3.45	2.13	3.65	3.06	-4.05	0.0477	8.84e-05	Moderately soluble	-3.71	0.104	0.000194	Soluble	-6.18	0.000356	6.61e-07	Poorly soluble	High	No	Yes	No	No	No	Yes	Yes	-8.21	1	3	0	0	0	0.55	0	0	2	4.94
ZINC000043206665	CC(=O)Nc1cn2nc(-c3cnc(Cl)c(NS(=O)(=O)c4ccc(F)cc4)c3)ccc2n1	C19H14ClFN6O3S	460.87	31	21	0.05	6	7	2	112.61	126.73	2.14	2.01	4.46	1.97	1.59	2.43	-4.07	0.0393	8.53e-05	Moderately soluble	-4.3	0.0232	5.03e-05	Moderately soluble	-7.5	1.46e-05	3.17e-08	Poorly soluble	Low	No	No	Yes	Yes	Yes	No	Yes	-7.68	0	0	0	0	0	0.55	0	1	1	3.4
ZINC000043207091	Cc1c(Nc2c(C#N)cncc2/C=C/CCN2CCC[C@@H](N)C2)ccc2[nH]ccc12	C24H28N6	400.52	30	15	0.33	6	4	3	126.46	93.76	3.08	3.71	3.82	1.46	4.01	3.22	-4.63	0.00929	2.32e-05	Moderately soluble	-5.37	0.00171	4.27e-06	Moderately soluble	-6.91	4.94e-05	1.23e-07	Poorly soluble	High	No	Yes	No	Yes	Yes	Yes	Yes	-6.11	0	0	0	0	0	0.55	0	0	2	4.2
ZINC000044280380	CN1CCN(c2nccc3cc(-c4ccccc4)c(-c4ccc(CN5CCC(c6n[nH]c(-c7ccccn7)n6)CC5)cc4)nc23)CC1	C38H39N9	621.78	47	33	0.29	7	7	1	198.03	89.96	4.83	5.48	4.98	3.3	5.73	4.86	-7.2	3.88e-05	6.24e-08	Poorly soluble	-7.13	4.64e-05	7.47e-08	Poorly soluble	-12.22	3.7e-10	5.96e-13	Insoluble	High	No	No	Yes	No	Yes	No	No	-6.2	1	3	0	0	3	0.55	0	0	2	5.26
ZINC000044280505	c1ccc(-c2cc3cnc(N4CCCCC4)nc3nc2-c2ccc(CN3CCC(c4n[nH]c(-c5ccccn5)n4)CC3)cc2)cc1	C37H37N9	607.75	46	33	0.3	7	7	1	189.01	99.61	4.66	6.19	6	4.2	6.16	5.44	-7.58	1.61e-05	2.65e-08	Poorly soluble	-8.07	5.22e-06	8.58e-09	Poorly soluble	-12.43	2.27e-10	3.74e-13	Insoluble	Low	No	No	Yes	No	Yes	No	Yes	-5.61	2	4	0	1	3	0.17	0	0	2	5.09
ZINC000044281224	CN1CCN(c2ccc3nc(-c4ccccc4)c(-c4ccc(CN5CCC(c6n[nH]c(-c7ccccn7)n6)CC5)cc4)nc3n2)CC1	C37H38N10	622.76	47	33	0.3	7	8	1	195.82	102.85	4.96	4.86	4.38	3.03	5.15	4.47	-6.82	9.41e-05	1.51e-07	Poorly soluble	-6.75	0.00011	1.76e-07	Poorly soluble	-11.85	8.78e-10	1.41e-12	Insoluble	High	No	No	Yes	No	Yes	Yes	Yes	-6.65	1	3	0	0	2	0.55	0	0	2	5.21
ZINC000044304952	Cc1nnc2c3cc(-c4ccccc4)c(-c4ccc(CN5CCC(c6n[nH]c(-c7ccccn7)n6)CC5)cc4)nc3ccn12	C35H31N9	577.68	44	36	0.2	6	7	1	175.48	100.78	4.46	5.93	5.95	4.12	5.62	5.22	-7.37	2.48e-05	4.3e-08	Poorly soluble	-7.82	8.72e-06	1.51e-08	Poorly soluble	-12.19	3.73e-10	6.46e-13	Insoluble	Low	No	No	No	No	Yes	No	No	-5.61	1	4	0	1	2	0.55	0	0	2	4.75
ZINC000044304974	O=C1NCCc2nc(-c3ccc(CN4CCC(c5n[nH]c(-c6ccccn6)n5)CC4)cc3)c(-c3ccccc3)cc21	C33H31N7O	541.65	41	29	0.24	6	6	2	166.23	99.69	3.97	4.29	4.35	3.01	5.91	4.3	-6.03	0.000507	9.37e-07	Poorly soluble	-6.1	0.000434	8.01e-07	Poorly soluble	-11.63	1.28e-09	2.36e-12	Insoluble	High	No	Yes	Yes	No	Yes	Yes	No	-6.56	1	3	0	0	0	0.55	0	0	2	4.65
ZINC000044305572	O=c1[nH]ccc2nc(-c3ccc(CN4CCC(c5n[nH]c(-c6ncccn6)n5)CC4)cc3)c(-c3ccccc3)cc12	C32H28N8O	540.62	41	33	0.19	6	7	2	162.39	116.34	3.48	3.74	4.68	2.96	5.83	4.14	-5.75	0.000967	1.79e-06	Moderately soluble	-5.88	0.00072	1.33e-06	Moderately soluble	-11.7	1.09e-09	2.01e-12	Insoluble	High	No	Yes	Yes	No	Yes	No	No	-6.94	1	2	0	0	0	0.55	0	0	2	4.4
ZINC000044305959	CN1CCN(c2ncc3cc(-c4ccccc4)c(-c4ccc(CN5CCC(c6n[nH]c(-c7ccc(N)nc7)n6)CC5)cc4)nc3n2)CC1	C37H39N11	637.78	48	33	0.3	7	8	2	200.23	128.87	4.14	4.78	3.97	3.34	4.43	4.13	-6.85	8.96e-05	1.4e-07	Poorly soluble	-7.22	3.86e-05	6.06e-08	Poorly soluble	-11.47	2.15e-09	3.37e-12	Insoluble	Low	No	Yes	Yes	Yes	Yes	No	Yes	-6.8	2	3	0	0	2	0.17	0	0	2	5.28
ZINC000044306105	O=c1[nH]ccc2nc(-c3ccc(CN4CCC(c5n[nH]c(-c6cnccn6)n5)CC4)cc3)c(-c3ccccc3)cc12	C32H28N8O	540.62	41	33	0.19	6	7	2	162.39	116.34	3.56	3.32	4.68	2.56	5.83	3.99	-5.48	0.00178	3.29e-06	Moderately soluble	-5.44	0.00197	3.63e-06	Moderately soluble	-11.7	1.09e-09	2.01e-12	Insoluble	High	No	Yes	Yes	No	Yes	No	No	-7.24	1	2	0	0	0	0.55	0	0	1	4.58
ZINC000044306327	COc1ccc(-c2nc(C3CCN(Cc4ccc(-c5nc6cc[nH]c(=O)c6cc5-c5ccccc5)cc4)CC3)n[nH]2)cn1	C34H31N7O2	569.66	43	33	0.21	7	7	2	171.08	112.68	2.94	4.66	5.29	3.19	6.47	4.51	-6.41	0.00022	3.86e-07	Poorly soluble	-6.75	0.000101	1.77e-07	Poorly soluble	-12.16	3.94e-10	6.92e-13	Insoluble	Low	No	No	Yes	No	Yes	No	No	-6.47	1	3	0	0	0	0.55	0	0	2	4.74
ZINC000044307022	CN1CCN(c2cc3cc(-c4ccccc4)c(-c4ccc(CN5CCC(c6n[nH]c(-c7ccccn7)n6)CC5)cc4)nc3cn2)CC1	C38H39N9	621.78	47	33	0.29	7	7	1	198.03	89.96	5.1	5.48	4.98	3.3	5.73	4.92	-7.2	3.88e-05	6.24e-08	Poorly soluble	-7.13	4.64e-05	7.47e-08	Poorly soluble	-12.22	3.7e-10	5.96e-13	Insoluble	High	No	No	Yes	No	Yes	No	No	-6.2	1	3	0	0	3	0.55	0	0	2	5.22
ZINC000044307954	FC1(F)CCN(c2ncc3cc(-c4ccccc4)c(-c4ccc(CN5CCC(c6n[nH]c(-c7ccccn7)n6)CC5)cc4)nc3n2)C1	C36H33F2N9	629.7	47	33	0.28	7	9	1	184.34	99.61	4.67	6.15	6.69	4.2	6.34	5.61	-7.68	1.33e-05	2.11e-08	Poorly soluble	-8.02	5.95e-06	9.44e-09	Poorly soluble	-12.66	1.36e-10	2.16e-13	Insoluble	Low	No	No	Yes	No	Yes	No	Yes	-5.77	2	4	0	1	3	0.17	0	0	2	5.03
ZINC000044351472	CN1CCN(c2ccc3nc(-c4ccc(CN5CCC(c6n[nH]c(-c7ccccn7)n6)CC5)cc4)c(-c4ccccc4)nc3n2)CC1	C37H38N10	622.76	47	33	0.3	7	8	1	195.82	102.85	4.94	4.86	4.38	3.03	5.15	4.47	-6.82	9.41e-05	1.51e-07	Poorly soluble	-6.75	0.00011	1.76e-07	Poorly soluble	-11.85	8.78e-10	1.41e-12	Insoluble	High	No	No	Yes	No	Yes	Yes	Yes	-6.65	1	3	0	0	2	0.55	0	0	2	5.21
ZINC000044351801	C[C@H]1CN(c2ncc3cc(-c4ccccc4)c(-c4ccc(CN5CCC(c6n[nH]c(-c7ccccn7)n6)CC5)cc4)nc3n2)C[C@@H](C)N1	C38H40N10	636.79	48	33	0.32	7	8	2	200.53	111.64	4.3	5.56	4.81	3.61	5.43	4.74	-7.34	2.93e-05	4.6e-08	Poorly soluble	-7.67	1.38e-05	2.16e-08	Poorly soluble	-12.47	2.14e-10	3.37e-13	Insoluble	High	No	No	Yes	No	No	No	Yes	-6.24	1	3	0	0	3	0.55	0	0	2	5.76
ZINC000044352024	c1ccc(-c2cc3cnc(-n4ccnc4)nc3nc2-c2ccc(CN3CCC(c4n[nH]c(-c5ccccn5)n4)CC3)cc2)cc1	C35H30N10	590.68	45	38	0.17	7	8	1	176.68	114.19	3.6	4.98	5.57	2.91	5.08	4.43	-6.8	9.31e-05	1.58e-07	Poorly soluble	-7.12	4.51e-05	7.64e-08	Poorly soluble	-12.26	3.28e-10	5.56e-13	Insoluble	Low	No	No	No	No	Yes	No	No	-6.37	1	3	0	0	1	0.55	0	0	2	4.83
ZINC000044352127	CN1CCN(c2ncc3cc(-c4ccccc4)c(-c4ccc(CN5CCC(c6n[nH]c(-c7ncccn7)n6)CC5)cc4)nc3n2)CC1	C36H37N11	623.75	47	33	0.31	7	9	1	193.62	115.74	4.53	4.51	3.77	2.9	4.57	4.06	-6.61	0.000154	2.48e-07	Poorly soluble	-6.66	0.000136	2.18e-07	Poorly soluble	-11.48	2.07e-09	3.33e-12	Insoluble	High	No	Yes	Yes	Yes	Yes	Yes	Yes	-6.9	2	3	0	0	2	0.17	0	0	2	5.05
ZINC000044359473	C[C@H]1CN(c2ncc3cc(-c4ccccc4)c(-c4ccc(CN5CCC(c6n[nH]c(-c7ccccn7)n6)CC5)cc4)nc3n2)[C@H](C)CN1	C38H40N10	636.79	48	33	0.32	7	8	2	200.53	111.64	4.83	5.56	4.81	3.61	5.43	4.85	-7.34	2.93e-05	4.6e-08	Poorly soluble	-7.67	1.38e-05	2.16e-08	Poorly soluble	-12.47	2.14e-10	3.37e-13	Insoluble	High	No	No	Yes	No	No	No	Yes	-6.24	1	3	0	0	3	0.55	0	0	2	5.76
ZINC000044674961	COc1cc2ncc3c(N)nc(-c4cncc(OC[C@@H](N)Cc5ccccc5)c4)cc3c2cc1OC	C28H27N5O3	481.55	36	26	0.18	8	7	2	140.96	118.4	3.5	3.61	4.4	1.61	4.47	3.52	-5.11	0.00377	7.83e-06	Moderately soluble	-5.78	0.000792	1.65e-06	Moderately soluble	-9.64	1.09e-07	2.27e-10	Poorly soluble	High	No	Yes	No	Yes	Yes	Yes	Yes	-6.67	0	2	0	0	0	0.55	0	1	3	4.23
ZINC000044675807	COc1cc2ncc3c(N)nc(-c4cncc(OC[C@H](N)Cc5ccccc5)c4)cc3c2cc1OC	C28H27N5O3	481.55	36	26	0.18	8	7	2	140.96	118.4	3.62	3.61	4.4	1.61	4.47	3.54	-5.11	0.00377	7.83e-06	Moderately soluble	-5.78	0.000792	1.65e-06	Moderately soluble	-9.64	1.09e-07	2.27e-10	Poorly soluble	High	No	Yes	No	Yes	Yes	Yes	Yes	-6.67	0	2	0	0	0	0.55	0	1	3	4.23
ZINC000045261855	Cc1cc(C[C@H](N)COc2cncc(-c3cc4c(C)n[nH]c4cn3)c2)ccc1F	C22H22FN5O	391.44	29	21	0.23	6	6	2	110.31	89.71	2.76	2.99	4.14	1.88	5.01	3.36	-4.29	0.0201	5.12e-05	Moderately soluble	-4.54	0.0113	2.9e-05	Moderately soluble	-8.42	1.48e-06	3.78e-09	Poorly soluble	High	No	Yes	No	Yes	Yes	Yes	Yes	-6.56	0	0	0	0	0	0.55	0	0	1	3.8
ZINC000045261897	Cc1n[nH]c2cnc(-c3cncc(OC[C@@H](N)Cc4ccc(Br)cc4)c3)cc12	C21H20BrN5O	438.32	28	21	0.19	6	5	2	113.09	89.71	2.63	3.22	4.04	1.88	4.75	3.3	-4.75	0.00788	1.8e-05	Moderately soluble	-4.78	0.00733	1.67e-05	Moderately soluble	-8.57	1.19e-06	2.72e-09	Poorly soluble	High	No	Yes	No	Yes	Yes	Yes	Yes	-6.69	0	0	0	0	0	0.55	0	0	1	3.72
ZINC000045283413	Cc1ccc(F)cc1C[C@H](N)COc1cncc(-c2cc3c(C)n[nH]c3cn2)c1	C22H22FN5O	391.44	29	21	0.23	6	6	2	110.31	89.71	2.6	2.99	4.14	1.88	5.01	3.33	-4.29	0.0201	5.12e-05	Moderately soluble	-4.54	0.0113	2.9e-05	Moderately soluble	-8.42	1.48e-06	3.78e-09	Poorly soluble	High	No	Yes	No	Yes	Yes	Yes	Yes	-6.56	0	0	0	0	0	0.55	0	0	1	3.85
ZINC000045284053	CCc1ncc(OC[C@@H](N)Cc2c[nH]c3ccccc23)cc1-c1ccc2cnccc2c1	C27H26N4O	422.52	32	25	0.19	7	4	2	129.9	76.82	3.56	4.67	5.29	2.37	6.06	4.39	-5.52	0.00128	3.03e-06	Moderately soluble	-6.01	0.000412	9.76e-07	Poorly soluble	-10.18	2.79e-08	6.59e-11	Insoluble	High	No	Yes	Yes	No	Yes	Yes	Yes	-5.56	0	0	0	0	0	0.55	0	0	2	3.92
ZINC000045284505	N[C@H](COc1cncc(-c2ccc3c(c2)[C@@H](C2CC2)C(=O)N3)c1)Cc1c[nH]c2ccccc12	C27H26N4O2	438.52	33	21	0.26	7	4	3	132.43	93.03	3.02	3.66	3.99	2.33	5.09	3.62	-4.87	0.00587	1.34e-05	Moderately soluble	-5.3	0.00218	4.98e-06	Moderately soluble	-8.93	5.14e-07	1.17e-09	Poorly soluble	High	No	Yes	No	Yes	Yes	Yes	Yes	-6.38	0	1	0	0	0	0.55	0	0	2	4.18
ZINC000045284711	N[C@H](COc1cncc(-c2ccc(NC(=O)Nc3ccccc3)cn2)c1)Cc1c[nH]c2ccccc12	C28H26N6O2	478.55	36	27	0.11	10	5	4	141.35	117.95	2.9	3.19	4.84	1.82	4.05	3.36	-4.71	0.00929	1.94e-05	Moderately soluble	-5.34	0.0022	4.59e-06	Moderately soluble	-10.23	2.84e-08	5.94e-11	Insoluble	Low	No	Yes	Yes	Yes	Yes	Yes	Yes	-6.95	0	1	0	0	0	0.55	0	0	2	4.24
ZINC000045285124	N[C@H](COc1cncc(-c2ccc3c(c2)[C@@H](c2ccco2)C(=O)N3)c1)Cc1c[nH]c2ccccc12	C28H24N4O3	464.52	35	26	0.14	7	5	3	136.88	106.17	3.29	3.3	4.28	1.56	5.06	3.5	-4.89	0.00603	1.3e-05	Moderately soluble	-5.21	0.0029	6.23e-06	Moderately soluble	-10.04	4.28e-08	9.2e-11	Insoluble	High	No	Yes	No	Yes	Yes	Yes	Yes	-6.79	0	1	0	0	0	0.55	0	0	1	4.44
ZINC000045285805	N[C@H](COc1cncc(-c2ccc3c(c2)[C@@H](c2c[nH]c4ccccc24)C(=O)N3)c1)Cc1c[nH]c2ccccc12	C32H27N5O2	513.59	39	30	0.12	7	4	4	156.47	108.82	2.46	4.33	5.17	2.43	6.2	4.12	-5.86	0.00071	1.38e-06	Moderately soluble	-6.33	0.00024	4.68e-07	Poorly soluble	-11.65	1.14e-09	2.22e-12	Insoluble	High	No	No	Yes	No	Yes	No	Yes	-6.36	1	2	0	0	0	0.55	0	0	2	4.56
ZINC000045285827	N[C@H](COc1cncc(-c2ccc3c(c2)[C@@H](c2ccccn2)C(=O)N3)c1)Cc1c[nH]c2ccccc12	C29H25N5O2	475.54	36	27	0.14	7	5	3	142.4	105.92	2.8	3.17	4.09	1.72	5.11	3.38	-4.88	0.00629	1.32e-05	Moderately soluble	-5.07	0.00409	8.61e-06	Moderately soluble	-10.44	1.73e-08	3.65e-11	Insoluble	High	No	Yes	Yes	Yes	Yes	Yes	Yes	-6.95	0	1	0	0	0	0.55	0	0	1	4.39
ZINC000045286093	N[C@H](COc1cncc(-c2ccc3ncccc3c2)c1)Cc1c[nH]c2ccccc12	C25H22N4O	394.47	30	25	0.12	6	4	2	120.13	76.82	2.82	3.93	4.73	2.23	5.14	3.77	-4.98	0.00411	1.04e-05	Moderately soluble	-5.24	0.00226	5.72e-06	Moderately soluble	-9.41	1.52e-07	3.85e-10	Poorly soluble	High	No	Yes	No	Yes	Yes	Yes	Yes	-5.92	0	0	0	0	0	0.55	0	0	2	3.61
ZINC000045286757	Cn1cc([C@@H](CN)Oc2cncc(/C=C/c3ccncc3)c2)c2ccccc21	C23H22N4O	370.45	28	21	0.13	6	4	1	112.65	65.96	3.19	2.69	3.68	1.65	3.81	3	-3.99	0.0379	0.000102	Soluble	-3.73	0.0693	0.000187	Soluble	-7	3.66e-05	9.89e-08	Poorly soluble	High	Yes	Yes	No	Yes	Yes	Yes	Yes	-6.65	0	0	0	0	0	0.55	0	0	1	3.73
ZINC000045286759	Cn1cc([C@H](CN)Oc2cncc(/C=C/c3ccncc3)c2)c2ccccc21	C23H22N4O	370.45	28	21	0.13	6	4	1	112.65	65.96	3.21	2.69	3.68	1.65	3.81	3.01	-3.99	0.0379	0.000102	Soluble	-3.73	0.0693	0.000187	Soluble	-7	3.66e-05	9.89e-08	Poorly soluble	High	Yes	Yes	No	Yes	Yes	Yes	Yes	-6.65	0	0	0	0	0	0.55	0	0	1	3.73
ZINC000045286989	N[C@H](COc1cncc(-c2ccc3c(c2)[C@@H](c2cccs2)C(=O)N3)c1)Cc1c[nH]c2ccccc12	C28H24N4O2S	480.58	35	26	0.14	7	4	3	142.49	121.27	3.17	3.92	4.75	2.36	6.31	4.1	-5.38	0.00202	4.2e-06	Moderately soluble	-6.17	0.000328	6.83e-07	Poorly soluble	-10.07	4.04e-08	8.41e-11	Insoluble	Low	No	Yes	No	Yes	Yes	Yes	Yes	-6.45	0	2	0	0	0	0.55	0	0	2	4.44
ZINC000045287908	Cc1n[nH]c2cnc(-c3cncc(OC[C@@H](N)Cc4c(F)cccc4F)c3)cc12	C21H19F2N5O	395.41	29	21	0.19	6	7	2	105.3	89.71	2.35	2.73	4.4	2.04	4.91	3.29	-4.15	0.0279	7.06e-05	Moderately soluble	-4.27	0.0213	5.39e-05	Moderately soluble	-8.31	1.93e-06	4.89e-09	Poorly soluble	High	No	Yes	Yes	Yes	Yes	Yes	Yes	-6.77	0	0	0	0	0	0.55	0	0	1	3.74
ZINC000045288008	N[C@H](COc1cncc(-c2ccc3[nH]nc(C=O)c3c2)c1)Cc1c[nH]c2ccccc12	C24H21N5O2	411.46	31	24	0.12	7	5	3	119.87	109.68	1.71	3.08	3.87	1.19	4.86	2.94	-4.44	0.0149	3.61e-05	Moderately soluble	-5.05	0.00366	8.9e-06	Moderately soluble	-8.56	1.14e-06	2.76e-09	Poorly soluble	High	No	Yes	No	Yes	Yes	Yes	Yes	-6.62	0	0	0	0	0	0.55	0	1	1	3.58
ZINC000045288262	Cc1n[nH]c2cnc(-c3cncc(OC[C@@H](N)Cc4cccc(F)c4)c3)cc12	C21H20FN5O	377.41	28	21	0.19	6	6	2	105.34	89.71	2.4	2.63	3.84	1.66	4.49	3	-4	0.0381	0.000101	Soluble	-4.16	0.0259	6.85e-05	Moderately soluble	-8.05	3.39e-06	8.97e-09	Poorly soluble	High	No	Yes	No	Yes	Yes	Yes	Yes	-6.73	0	0	0	0	0	0.55	0	0	1	3.72
ZINC000045288593	Cc1cc(C)c(C[C@H](N)COc2cncc(-c3cc4c(C)n[nH]c4cn3)c2)c(C)c1	C24H27N5O	401.5	30	21	0.29	6	5	2	120.28	89.71	2.65	3.62	4.2	1.93	5.64	3.61	-4.73	0.00744	1.85e-05	Moderately soluble	-5.19	0.00258	6.43e-06	Moderately soluble	-8.91	4.95e-07	1.23e-09	Poorly soluble	High	No	Yes	No	Yes	Yes	Yes	Yes	-6.18	0	0	0	0	0	0.55	0	0	2	4.03
ZINC000045288596	Cc1n[nH]c2cnc(-c3cncc(OC[C@@H](N)Cc4ccc(C(F)(F)F)cc4)c3)cc12	C22H20F3N5O	427.42	31	21	0.23	7	8	2	110.39	89.71	2.44	3.41	5.45	2.09	5.14	3.71	-4.68	0.00898	2.1e-05	Moderately soluble	-4.97	0.00454	1.06e-05	Moderately soluble	-8.61	1.05e-06	2.45e-09	Poorly soluble	High	No	Yes	Yes	Yes	Yes	Yes	Yes	-6.49	0	0	0	0	0	0.55	0	0	1	3.8
ZINC000045288923	Cc1cc([C@@H]2C(=O)Nc3ccc(-c4cncc(OC[C@@H](N)Cc5c[nH]c6ccccc56)c4)cc32)oc1C	C30H28N4O3	492.57	37	26	0.2	7	5	3	146.81	106.17	3.69	4.07	4.9	1.95	6.12	4.15	-5.52	0.0015	3.05e-06	Moderately soluble	-6	0.000488	9.9e-07	Poorly soluble	-10.78	8.16e-09	1.66e-11	Insoluble	High	No	Yes	Yes	Yes	Yes	Yes	Yes	-6.41	0	2	0	0	0	0.55	0	0	2	4.78
ZINC000045289188	N[C@H](COc1cncc(NC(=O)c2ccncc2)c1)Cc1c[nH]c2ccccc12	C22H21N5O2	387.43	29	21	0.14	8	5	3	111.4	105.92	2.1	1.8	2.97	0.76	3.27	2.18	-3.38	0.16	0.000413	Soluble	-3.64	0.0881	0.000227	Soluble	-7.75	6.97e-06	1.8e-08	Poorly soluble	High	No	Yes	No	Yes	Yes	Yes	Yes	-7.39	0	0	0	0	0	0.55	0	0	2	3.5
ZINC000045289393	Cc1n[nH]c2cnc(-c3cncc(OC[C@@H](N)Cc4cccc(OCC5CCCCC5)c4)c3)cc12	C28H33N5O2	471.59	35	21	0.39	9	6	2	138.61	98.94	3.52	4.87	5.24	2.21	5.67	4.3	-5.68	0.000981	2.08e-06	Moderately soluble	-6.68	9.8e-05	2.08e-07	Poorly soluble	-9.26	2.59e-07	5.48e-10	Poorly soluble	High	No	Yes	No	Yes	Yes	Yes	Yes	-5.72	0	1	0	0	0	0.55	0	0	3	4.51
ZINC000045289396	Cc1n[nH]c2cnc(-c3cncc(OC[C@@H](N)Cc4cccc(OCCN)c4)c3)cc12	C23H26N6O2	418.49	31	21	0.26	9	7	3	119.39	124.96	2.67	1.56	2.61	0.4	3.68	2.19	-3.32	0.198	0.000473	Soluble	-3.79	0.0672	0.000161	Soluble	-7.92	4.99e-06	1.19e-08	Poorly soluble	High	No	Yes	No	Yes	No	Yes	Yes	-7.75	0	0	0	0	0	0.55	0	0	2	4.06
ZINC000045290215	CCc1c(C)[nH]c([C@H]2C(=O)Nc3ccc(-c4cncc(OC[C@@H](N)Cc5c[nH]c6ccccc56)c4)cc32)c1C	C32H33N5O2	519.64	39	26	0.25	8	4	4	158.67	108.82	3.4	4.59	5.2	2.33	7.19	4.54	-5.92	0.000626	1.21e-06	Moderately soluble	-6.6	0.000131	2.51e-07	Poorly soluble	-11.54	1.51e-09	2.9e-12	Insoluble	High	No	No	Yes	Yes	No	No	Yes	-6.21	1	3	0	0	0	0.55	0	0	3	4.89
ZINC000045290259	Cc1n[nH]c2cnc(-c3cncc(OC[C@@H](N)Cc4ccc(F)c(F)c4F)c3)cc12	C21H18F3N5O	413.4	30	21	0.19	6	8	2	105.26	89.71	2.67	2.83	4.96	2.42	5.34	3.64	-4.31	0.0203	4.92e-05	Moderately soluble	-4.37	0.0176	4.25e-05	Moderately soluble	-8.57	1.1e-06	2.66e-09	Poorly soluble	High	No	Yes	Yes	Yes	Yes	Yes	Yes	-6.81	0	0	0	0	0	0.55	0	1	1	3.82
ZINC000045290356	Cc1ccc([C@H]2C(=O)Nc3ccc(-c4cncc(OC[C@@H](N)Cc5c[nH]c6ccccc56)c4)cc32)o1	C29H26N4O3	478.54	36	26	0.17	7	5	3	141.84	106.17	3.49	3.7	4.59	1.76	5.59	3.82	-5.21	0.00295	6.16e-06	Moderately soluble	-5.62	0.00115	2.4e-06	Moderately soluble	-10.41	1.87e-08	3.9e-11	Insoluble	High	No	Yes	Yes	Yes	Yes	Yes	Yes	-6.59	0	1	0	0	0	0.55	0	0	2	4.62
ZINC000045290596	N[C@H](COc1cncc(-c2ccc3c(c2)[C@@H](c2ccccc2)C(=O)N3)c1)Cc1c[nH]c2ccccc12	C30H26N4O2	474.55	36	27	0.13	7	4	3	144.61	93.03	3.36	4.2	4.69	2.71	5.68	4.13	-5.52	0.00143	3.01e-06	Moderately soluble	-5.86	0.00065	1.37e-06	Moderately soluble	-10.81	7.32e-09	1.54e-11	Insoluble	High	No	Yes	Yes	Yes	Yes	Yes	Yes	-6.21	0	1	0	0	0	0.55	0	0	2	4.38
ZINC000045298514	Cc1cc(F)ccc1C[C@H](N)COc1cncc(-c2cc3c(C)n[nH]c3cn2)c1	C22H22FN5O	391.44	29	21	0.23	6	6	2	110.31	89.71	2.78	2.99	4.14	1.88	5.01	3.36	-4.29	0.0201	5.12e-05	Moderately soluble	-4.54	0.0113	2.9e-05	Moderately soluble	-8.42	1.48e-06	3.78e-09	Poorly soluble	High	No	Yes	No	Yes	Yes	Yes	Yes	-6.56	0	0	0	0	0	0.55	0	0	1	3.81
ZINC000045298533	N[C@H](COc1cncc(CCc2ccncc2)c1)Cc1c[nH]c2ccccc12	C23H24N4O	372.46	28	21	0.22	8	4	2	111.45	76.82	2.71	3.18	3.69	1.72	4.9	3.24	-4.18	0.0246	6.61e-05	Moderately soluble	-4.46	0.0128	3.43e-05	Moderately soluble	-8.57	1.01e-06	2.72e-09	Poorly soluble	High	Yes	Yes	No	Yes	Yes	Yes	Yes	-6.31	0	0	0	0	0	0.55	0	0	2	3.54
ZINC000045298615	Cc1n[nH]c2cnc(-c3cncc(OC[C@@H](N)Cc4cccc(OCC5CCNCC5)c4)c3)cc12	C27H32N6O2	472.58	35	21	0.37	9	7	3	140.52	110.97	3.53	2.82	3.27	1.22	4.7	3.11	-4.4	0.019	4.01e-05	Moderately soluble	-4.81	0.00736	1.56e-05	Moderately soluble	-9.03	4.38e-07	9.27e-10	Poorly soluble	High	No	Yes	No	Yes	No	Yes	Yes	-7.18	0	1	0	0	0	0.55	0	0	2	4.38
ZINC000045298808	Cc1n[nH]c2cnc(-c3cncc(OC[C@@H](N)Cc4cccc(OCCN5CCOCC5)c4)c3)cc12	C27H32N6O3	488.58	36	21	0.37	10	8	2	141.7	111.41	3.76	2.16	2.61	0.45	4.3	2.65	-4	0.0487	9.96e-05	Moderately soluble	-4.13	0.036	7.37e-05	Moderately soluble	-8.4	1.96e-06	4.01e-09	Poorly soluble	High	No	Yes	No	No	Yes	Yes	Yes	-7.75	0	2	0	0	0	0.55	0	0	2	4.48
ZINC000045300261	N[C@H](COc1cncc(-c2ccc3c(c2)[C@H](Cc2ccco2)C(=O)N3)c1)Cc1ccccc1	C27H25N3O3	439.51	33	23	0.19	8	5	2	129.83	90.38	3.31	3.47	4	2.03	4.94	3.55	-4.74	0.00802	1.82e-05	Moderately soluble	-5.05	0.00392	8.91e-06	Moderately soluble	-9.58	1.16e-07	2.63e-10	Poorly soluble	High	No	Yes	No	Yes	Yes	Yes	Yes	-6.52	0	0	0	0	0	0.55	0	0	2	4.31
ZINC000045300307	N[C@H](COc1cncc(-c2ccc3c(c2)[C@H](c2cccnc2)C(=O)N3)c1)Cc1c[nH]c2ccccc12	C29H25N5O2	475.54	36	27	0.14	7	5	3	142.4	105.92	2.98	3.13	4.09	1.72	5.11	3.4	-4.85	0.00667	1.4e-05	Moderately soluble	-5.02	0.0045	9.47e-06	Moderately soluble	-10.44	1.73e-08	3.65e-11	Insoluble	High	No	Yes	Yes	Yes	Yes	Yes	Yes	-6.98	0	1	0	0	0	0.55	0	0	1	4.37
ZINC000045300556	Cc1n[nH]c2cnc(-c3cncc(OC[C@@H](N)Cc4cccc5c4OC(F)(F)O5)c3)cc12	C22H19F2N5O3	439.41	32	21	0.23	6	9	2	111.59	108.17	2.85	3.11	4.44	1.07	4.33	3.16	-4.61	0.0107	2.44e-05	Moderately soluble	-5.05	0.00392	8.91e-06	Moderately soluble	-8.01	4.26e-06	9.71e-09	Poorly soluble	High	No	Yes	Yes	No	Yes	Yes	Yes	-6.77	0	0	0	0	0	0.55	0	0	1	4.07
ZINC000045301144	N[C@H](COc1cncc(-c2ccc3c(c2)[C@H](c2ccc[nH]2)C(=O)N3)c1)Cc1c[nH]c2ccccc12	C28H25N5O2	463.53	35	26	0.14	7	4	4	138.96	108.82	2.94	3.03	4.02	1.56	5.19	3.35	-4.71	0.00903	1.95e-05	Moderately soluble	-4.98	0.00485	1.05e-05	Moderately soluble	-10.03	4.29e-08	9.25e-11	Insoluble	High	No	Yes	No	Yes	Yes	Yes	Yes	-6.98	0	1	0	0	0	0.55	0	0	1	4.35
ZINC000045303170	N[C@H](COc1cncc(-c2ccc3c(c2)[C@@H](c2ncc[nH]2)C(=O)N3)c1)Cc1c[nH]c2ccccc12	C27H24N6O2	464.52	35	26	0.15	7	5	4	136.76	121.71	2.19	2.38	3.41	0.98	4.62	2.72	-4.31	0.0229	4.93e-05	Moderately soluble	-4.58	0.0123	2.65e-05	Moderately soluble	-9.66	1.01e-07	2.18e-10	Poorly soluble	High	No	Yes	No	Yes	Yes	Yes	Yes	-7.44	0	1	0	0	0	0.55	0	0	1	4.26
ZINC000045321256	Cn1cccc1[C@H]1C(=O)Nc2ccc(-c3cncc(OC[C@@H](N)Cc4c[nH]c5ccccc45)c3)cc21	C29H27N5O2	477.56	36	26	0.17	7	4	3	143.86	97.96	2.88	2.98	4.03	1.76	4.67	3.26	-4.75	0.00848	1.78e-05	Moderately soluble	-4.7	0.00951	1.99e-05	Moderately soluble	-9.58	1.25e-07	2.62e-10	Poorly soluble	High	No	Yes	No	Yes	Yes	Yes	Yes	-7.1	0	1	0	0	0	0.55	0	0	1	4.48
ZINC000045335993	NCCn1cc(-c2cc(-c3cc4ccccc4s3)c3[nH]ncc3c2)c2nc(N)ncc21	C23H19N7S	425.51	31	27	0.09	4	4	3	126.62	139.67	2.72	2.95	4.41	2.26	4.33	3.33	-4.72	0.00816	1.92e-05	Moderately soluble	-5.55	0.00121	2.85e-06	Moderately soluble	-8.2	2.7e-06	6.35e-09	Poorly soluble	Low	No	Yes	Yes	Yes	No	Yes	No	-6.8	0	0	0	1	0	0.55	0	0	1	3.33
ZINC000045339868	Cc1occc1-c1nc(N)c(OC[C@@H](N)Cc2c[nH]c3ccccc23)cc1-c1ccc2[nH]nc(C)c2c1	C29H28N6O2	492.57	37	29	0.17	7	5	4	146.52	131.77	2.85	4.47	5.52	1.98	5.91	4.15	-5.83	0.000732	1.49e-06	Moderately soluble	-6.96	5.44e-05	1.1e-07	Poorly soluble	-10.68	1.04e-08	2.11e-11	Insoluble	Low	No	No	Yes	Yes	No	Yes	Yes	-6.13	0	2	0	1	0	0.55	0	0	2	4.56
ZINC000045339871	Cc1n[nH]c2ccc(-c3cc(OC[C@@H](N)Cc4c[nH]c5ccccc45)cnc3-c3ccoc3)cc12	C28H25N5O2	463.53	35	29	0.14	7	5	3	137.15	105.75	3.15	4.42	5.62	1.9	6.1	4.24	-5.65	0.00104	2.24e-06	Moderately soluble	-6.36	0.000203	4.38e-07	Poorly soluble	-10.68	9.75e-09	2.1e-11	Insoluble	Low	No	Yes	No	No	Yes	Yes	Yes	-5.99	0	2	0	0	0	0.55	0	0	2	4.26
ZINC000045339932	Cc1n[nH]c2ccc(-c3cc(OC[C@@H](N)Cc4c[nH]c5c(F)cccc45)cnc3-c3ccoc3)cc12	C28H24FN5O2	481.52	36	29	0.14	7	6	3	137.11	105.75	3.21	4.52	6.18	2.26	6.52	4.54	-5.81	0.000751	1.56e-06	Moderately soluble	-6.46	0.000166	3.45e-07	Poorly soluble	-10.94	5.55e-09	1.15e-11	Insoluble	Low	No	Yes	No	No	Yes	Yes	Yes	-6.03	0	3	0	1	0	0.55	0	0	2	4.26
ZINC000045339934	Cc1n[nH]c2ccc(-c3cc(OC[C@@H](N)Cc4c[nH]c5ncccc45)cnc3-c3ccoc3)cc12	C27H24N6O2	464.52	35	29	0.15	7	6	3	134.94	118.64	2.92	3.68	5.02	1.59	5.53	3.75	-5.19	0.003	6.46e-06	Moderately soluble	-5.86	0.000639	1.38e-06	Moderately soluble	-10.3	2.31e-08	4.97e-11	Insoluble	Low	No	Yes	No	No	Yes	Yes	Yes	-6.52	0	1	0	0	0	0.55	0	0	2	4.23
ZINC000045340157	Cc1occc1-c1nc(N)c(OC[C@@H](N)Cc2c[nH]c3ccccc23)cc1-c1cnc2[nH]nc(C)c2c1	C28H27N7O2	493.56	37	29	0.18	7	6	4	144.32	144.66	2.74	3.73	4.92	1.41	5.34	3.63	-5.37	0.00212	4.29e-06	Moderately soluble	-6.46	0.000171	3.47e-07	Poorly soluble	-10.3	2.47e-08	5e-11	Insoluble	Low	No	Yes	Yes	Yes	Yes	Yes	Yes	-6.66	0	2	1	1	0	0.55	0	0	2	4.57
ZINC000045347222	Cc1n[nH]c2ccc(-c3cc(OC[C@@H](N)Cc4c[nH]c5ccncc45)cnc3-c3ccoc3)cc12	C27H24N6O2	464.52	35	29	0.15	7	6	3	134.94	118.64	2.64	3.35	5.02	0.91	5.53	3.49	-4.98	0.00485	1.04e-05	Moderately soluble	-5.52	0.00141	3.03e-06	Moderately soluble	-10.3	2.31e-08	4.97e-11	Insoluble	Low	No	Yes	No	No	Yes	Yes	Yes	-6.76	0	1	0	0	0	0.55	0	0	1	4.21
ZINC000045348607	Cc1[nH]nc2ccc(-c3cc(OC[C@@H](N)Cc4ccccc4)cnc3-c3ccccc3O)cc12	C28H26N4O2	450.53	34	27	0.14	7	5	3	135.05	97.05	3.48	4.87	5.25	2.8	5.72	4.43	-5.83	0.000671	1.49e-06	Moderately soluble	-6.64	0.000103	2.28e-07	Poorly soluble	-10.02	4.34e-08	9.64e-11	Insoluble	High	No	Yes	No	No	No	Yes	Yes	-5.59	0	1	0	0	0	0.55	0	0	2	4.07
ZINC000045349847	CCNc1nc(-c2ccoc2)c(-c2cnc3[nH]nc(C)c3n2)cc1OC[C@@H](N)Cc1ccccc1	C26H27N7O2	469.54	35	26	0.23	9	7	3	135	127.77	3.26	3.29	4.17	1.15	4.58	3.29	-4.78	0.0078	1.66e-05	Moderately soluble	-5.65	0.00106	2.25e-06	Moderately soluble	-9.88	6.13e-08	1.31e-10	Poorly soluble	Low	No	Yes	No	Yes	Yes	Yes	Yes	-6.83	0	1	0	0	0	0.55	0	0	2	4.59
ZINC000045350614	Cc1[nH]nc2ccc(-c3cc(OC[C@@H](N)Cc4ccccc4)cnc3-c3ccc(O)cc3)cc12	C28H26N4O2	450.53	34	27	0.14	7	5	3	135.05	97.05	3.01	4.87	5.25	2.8	5.72	4.33	-5.83	0.000671	1.49e-06	Moderately soluble	-6.64	0.000103	2.28e-07	Poorly soluble	-10.02	4.34e-08	9.64e-11	Insoluble	High	No	Yes	No	No	Yes	Yes	Yes	-5.59	0	1	0	0	0	0.55	0	0	2	3.99
ZINC000045351148	Cc1[nH]nc2ccc(-c3cc(OC[C@@H](N)Cc4ccccc4)cnc3-c3cccc(O)c3)cc12	C28H26N4O2	450.53	34	27	0.14	7	5	3	135.05	97.05	2.99	4.87	5.25	2.8	5.72	4.33	-5.83	0.000671	1.49e-06	Moderately soluble	-6.64	0.000103	2.28e-07	Poorly soluble	-10.02	4.34e-08	9.64e-11	Insoluble	High	No	Yes	No	No	Yes	Yes	Yes	-5.59	0	1	0	0	0	0.55	0	0	2	4.02
ZINC000045351201	Cc1[nH]nc2ccc(-c3cc(OC[C@@H](N)Cc4ccccc4)cnc3-c3ccoc3)cc12	C26H24N4O2	424.49	32	26	0.15	7	5	2	125.29	89.96	3.31	4.29	5.14	2.17	5.58	4.1	-5.31	0.00206	4.85e-06	Moderately soluble	-5.89	0.000544	1.28e-06	Moderately soluble	-9.83	6.28e-08	1.48e-10	Poorly soluble	High	No	Yes	No	No	Yes	Yes	Yes	-5.84	0	0	0	0	0	0.55	0	0	2	4.08
ZINC000045351726	Cc1[nH]nc2ccc(-c3cc(OC[C@@H](N)Cc4ccccc4)cnc3-c3cc(F)ccc3O)cc12	C28H25FN4O2	468.52	35	27	0.14	7	6	3	135.01	97.05	3.36	4.97	5.81	3.17	6.14	4.69	-5.98	0.000485	1.04e-06	Moderately soluble	-6.75	8.4e-05	1.79e-07	Poorly soluble	-10.28	2.48e-08	5.28e-11	Insoluble	High	No	Yes	No	No	No	Yes	Yes	-5.63	0	2	0	0	0	0.55	0	0	2	4.06
ZINC000045352391	Cc1occc1-c1nc(N)c(OC[C@@H](N)Cc2ccccc2)cc1-c1cnc2n[nH]c(C)c2n1	C25H25N7O2	455.51	34	26	0.2	7	7	3	130.25	141.76	2.5	2.66	3.83	0.94	4.25	2.84	-4.44	0.0164	3.6e-05	Moderately soluble	-5.29	0.00234	5.15e-06	Moderately soluble	-9.08	3.76e-07	8.26e-10	Poorly soluble	Low	No	Yes	No	Yes	Yes	Yes	Yes	-7.19	0	1	1	1	0	0.55	0	0	1	4.52
ZINC000045352419	Cc1n[nH]c2cnc(-c3cc(OC[C@@H](N)Cc4c[nH]c5ccccc45)cnc3-c3ccoc3)cc12	C27H24N6O2	464.52	35	29	0.15	7	6	3	134.94	118.64	2.7	3.38	5.02	0.91	5.53	3.51	-5	0.00464	9.99e-06	Moderately soluble	-5.55	0.00131	2.82e-06	Moderately soluble	-10.3	2.31e-08	4.97e-11	Insoluble	Low	No	Yes	No	No	Yes	Yes	Yes	-6.73	0	1	0	0	0	0.55	0	0	1	4.38
ZINC000045352972	Cc1nc(-c2ccoc2)c(-c2cnc3[nH]nc(C)c3n2)cc1OC[C@@H](N)Cc1c[nH]c2ccccc12	C27H25N7O2	479.53	36	29	0.19	7	7	3	137.71	131.53	2.73	3.13	4.72	0.81	5.48	3.37	-4.92	0.00578	1.2e-05	Moderately soluble	-5.56	0.00132	2.75e-06	Moderately soluble	-10.3	2.39e-08	4.98e-11	Insoluble	Low	No	Yes	No	No	Yes	Yes	Yes	-7	0	1	0	0	0	0.55	0	0	1	4.6
ZINC000045353228	Cc1occc1-c1ncc(OC[C@@H](N)Cc2c[nH]c3ccccc23)cc1-c1ccc2[nH]nc(C)c2c1	C29H27N5O2	477.56	36	29	0.17	7	5	3	142.12	105.75	3.14	4.82	5.93	2.09	6.63	4.52	-5.97	0.00051	1.07e-06	Moderately soluble	-6.77	8.04e-05	1.68e-07	Poorly soluble	-11.05	4.26e-09	8.91e-12	Insoluble	Low	No	Yes	No	No	Yes	Yes	Yes	-5.79	0	2	0	1	0	0.55	0	0	2	4.43
ZINC000045354422	Cc1n[nH]c2ncc(-c3cc(OC[C@@H](N)Cc4c[nH]c5ccccc45)cnc3-c3ccoc3)cc12	C27H24N6O2	464.52	35	29	0.15	7	6	3	134.94	118.64	3	3.68	5.02	1.59	5.53	3.76	-5.19	0.003	6.46e-06	Moderately soluble	-5.86	0.000639	1.38e-06	Moderately soluble	-10.3	2.31e-08	4.97e-11	Insoluble	Low	No	Yes	No	No	Yes	Yes	Yes	-6.52	0	1	0	0	0	0.55	0	0	2	4.28
ZINC000045354426	Cc1n[nH]c2ccc(-c3cc(OC[C@@H](N)Cc4c[nH]c5ccccc45)cnc3-c3ccoc3)nc12	C27H24N6O2	464.52	35	29	0.15	7	6	3	134.94	118.64	2.86	3.47	5.02	1.18	5.53	3.61	-5.06	0.00407	8.76e-06	Moderately soluble	-5.64	0.00106	2.27e-06	Moderately soluble	-10.3	2.31e-08	4.97e-11	Insoluble	Low	No	Yes	No	No	Yes	Yes	Yes	-6.67	0	1	0	0	0	0.55	0	0	1	4.37
ZINC000045354506	Cc1[nH]nc2ccc(-c3cc(OC[C@@H](N)Cc4ccccc4)cnc3C#CCCO)cc12	C26H26N4O2	426.51	32	21	0.23	7	5	3	126.3	97.05	3.14	3.57	3.7	2.27	5.42	3.62	-4.76	0.00746	1.75e-05	Moderately soluble	-5.29	0.00217	5.08e-06	Moderately soluble	-8.41	1.64e-06	3.85e-09	Poorly soluble	High	No	Yes	No	No	Yes	Yes	Yes	-6.37	0	0	0	0	0	0.55	0	1	2	4.22
ZINC000045355597	Cc1[nH]nc2ccc(-c3cc(OC[C@@H](N)Cc4ccccc4)cnc3-c3cc(F)cc(F)c3O)cc12	C28H24F2N4O2	486.51	36	27	0.14	7	7	3	134.97	97.05	3.47	5.07	6.37	3.53	6.57	5	-6.14	0.00035	7.19e-07	Poorly soluble	-6.85	6.87e-05	1.41e-07	Poorly soluble	-10.54	1.41e-08	2.9e-11	Insoluble	Low	No	Yes	Yes	No	No	Yes	Yes	-5.67	0	3	0	1	1	0.55	0	0	2	4.08
ZINC000045355777	CN(Cc1ccc(Cl)cc1)C(=O)C1(N)CCN(c2ncnc3[nH]ccc23)CC1	C20H23ClN6O	398.89	28	15	0.35	5	4	2	113.1	91.14	2.19	2.17	2.03	1.98	2.38	2.15	-3.75	0.0715	0.000179	Soluble	-3.72	0.0765	0.000192	Soluble	-6.03	0.000376	9.42e-07	Poorly soluble	High	No	Yes	No	No	No	Yes	Yes	-7.19	0	0	0	0	0	0.55	0	0	1	3.09
ZINC000045356413	NC1(Cc2ccc(Cl)cc2Cl)CCN(c2ncnc3[nH]ccc23)CC1	C18H19Cl2N5	376.28	25	15	0.33	3	3	2	105.4	70.83	2.97	3.76	3.42	3.04	3.95	3.43	-4.79	0.00613	1.63e-05	Moderately soluble	-4.94	0.00432	1.15e-05	Moderately soluble	-6.99	3.87e-05	1.03e-07	Poorly soluble	High	Yes	Yes	Yes	Yes	Yes	Yes	Yes	-5.93	0	0	0	0	0	0.55	0	0	2	3.01
ZINC000045358429	Cc1n[nH]c2ncc(-c3cc(OC[C@@H](N)Cc4c[nH]c5ccccc45)cnc3-c3ccoc3)nc12	C26H23N7O2	465.51	35	29	0.15	7	7	3	132.74	131.53	2.86	2.73	4.41	0.61	4.95	3.11	-4.6	0.0118	2.53e-05	Moderately soluble	-5.15	0.00332	7.14e-06	Moderately soluble	-9.93	5.46e-08	1.17e-10	Poorly soluble	Low	No	Yes	No	No	Yes	Yes	Yes	-7.2	0	1	0	0	0	0.55	0	0	1	4.43
ZINC000045366459	Cc1occc1-c1ncc(OC[C@@H](N)Cc2c[nH]c3ccccc23)cc1-c1cnc2[nH]nc(C)c2n1	C27H25N7O2	479.53	36	29	0.19	7	7	3	137.71	131.53	2.6	3.13	4.72	0.81	5.48	3.35	-4.92	0.00578	1.2e-05	Moderately soluble	-5.56	0.00132	2.75e-06	Moderately soluble	-10.3	2.39e-08	4.98e-11	Insoluble	Low	No	Yes	No	No	Yes	Yes	Yes	-7	0	1	0	0	0	0.55	0	0	1	4.57
ZINC000045368487	NC1(C(=O)NCc2ccc(Cl)cc2Cl)CCN(c2ncnc3[nH]ccc23)CC1	C19H20Cl2N6O	419.31	28	15	0.32	5	4	3	113.21	99.93	2.7	2.62	2.35	1.98	3.08	2.55	-4.16	0.0292	6.97e-05	Moderately soluble	-4.37	0.0179	4.28e-05	Moderately soluble	-6.95	4.68e-05	1.12e-07	Poorly soluble	High	No	Yes	Yes	Yes	No	Yes	Yes	-7	0	0	0	0	0	0.55	0	0	1	3.12
ZINC000045375120	Cc1n[nH]c2ccc(-c3cc(OC[C@@H](N)Cc4c[nH]c5cc(F)ccc45)cnc3-c3ccoc3)cc12	C28H24FN5O2	481.52	36	29	0.14	7	6	3	137.11	105.75	3.07	4.52	6.18	2.26	6.52	4.51	-5.81	0.000751	1.56e-06	Moderately soluble	-6.46	0.000166	3.45e-07	Poorly soluble	-10.94	5.55e-09	1.15e-11	Insoluble	Low	No	Yes	No	No	Yes	Yes	Yes	-6.03	0	3	0	1	0	0.55	0	0	2	4.3
ZINC000045385227	Cc1[nH]nc2ccc(-c3cc(OC[C@@H](N)Cc4ccccc4)cnc3-c3ccsc3)cc12	C26H24N4OS	440.56	32	26	0.15	7	4	2	130.9	105.06	3.22	4.9	5.61	2.98	6.83	4.71	-5.8	0.000702	1.59e-06	Moderately soluble	-6.84	6.34e-05	1.44e-07	Poorly soluble	-9.87	5.94e-08	1.35e-10	Poorly soluble	Low	No	Yes	No	No	Yes	Yes	Yes	-5.51	0	2	0	0	0	0.55	0	0	2	4.03
ZINC000045386015	Cc1occc1-c1nc(N)c(OC[C@@H](N)Cc2c(C#N)[nH]c3ccccc23)cc1-c1cnc2[nH]nc(C)c2n1	C28H25N9O2	519.56	39	29	0.18	7	8	4	146.83	181.34	2.39	2.84	4.18	0.08	4.82	2.86	-4.94	0.00598	1.15e-05	Moderately soluble	-6.31	0.000257	4.94e-07	Poorly soluble	-9.98	5.38e-08	1.04e-10	Poorly soluble	Low	No	Yes	No	Yes	Yes	No	Yes	-7.45	2	2	1	1	1	0.17	0	0	1	4.76
ZINC000045386598	Cc1n[nH]c2ccc(-c3cc(OC[C@@H](N)Cc4c[nH]c5ccc(F)cc45)cnc3-c3ccoc3)cc12	C28H24FN5O2	481.52	36	29	0.14	7	6	3	137.11	105.75	3.24	4.52	6.18	2.26	6.52	4.54	-5.81	0.000751	1.56e-06	Moderately soluble	-6.46	0.000166	3.45e-07	Poorly soluble	-10.94	5.55e-09	1.15e-11	Insoluble	Low	No	Yes	No	No	Yes	Yes	Yes	-6.03	0	3	0	1	0	0.55	0	0	2	4.28
ZINC000045387434	CC(C)(C)c1ccc(CC2(N)CCN(c3ccnc4[nH]ncc34)CC2)cc1	C22H29N5	363.5	27	15	0.45	4	3	2	114.65	70.83	2.71	4	3.42	3.21	4.02	3.47	-4.76	0.00631	1.73e-05	Moderately soluble	-5.19	0.00235	6.47e-06	Moderately soluble	-6.98	3.84e-05	1.06e-07	Poorly soluble	High	Yes	Yes	Yes	Yes	No	Yes	Yes	-5.68	0	0	0	0	0	0.55	0	0	2	3.27
ZINC000045387760	Cc1n[nH]c2ncc(-c3cc(OC[C@@H](N)Cc4c[nH]c5ccccc45)c(C#N)nc3-c3ccoc3)nc12	C27H22N8O2	490.52	37	29	0.15	7	8	3	137.45	155.32	2.7	2.79	4.29	-0.03	5	2.95	-4.76	0.00859	1.75e-05	Moderately soluble	-5.71	0.000961	1.96e-06	Moderately soluble	-9.99	5.02e-08	1.02e-10	Poorly soluble	Low	No	Yes	No	No	Yes	Yes	Yes	-7.31	0	2	1	1	1	0.55	0	0	1	4.57
ZINC000045389978	Cc1n[nH]c2ccc(-c3cc(OC[C@@H](N)Cc4c[nH]c5cccnc45)cnc3-c3ccoc3)cc12	C27H24N6O2	464.52	35	29	0.15	7	6	3	134.94	118.64	2.75	3.43	5.02	1.18	5.53	3.58	-5.03	0.00431	9.29e-06	Moderately soluble	-5.6	0.00116	2.5e-06	Moderately soluble	-10.3	2.31e-08	4.97e-11	Insoluble	Low	No	Yes	No	No	Yes	Yes	Yes	-6.7	0	1	0	0	0	0.55	0	0	1	4.24
ZINC000045391891	Cc1n[nH]c2cnc(-c3cc(OC[C@@H](N)Cc4c[nH]c5ccccc45)cnc3-c3ccoc3)nc12	C26H23N7O2	465.51	35	29	0.15	7	7	3	132.74	131.53	2.87	2.82	4.41	0.87	4.95	3.19	-4.65	0.0103	2.22e-05	Moderately soluble	-5.24	0.00268	5.76e-06	Moderately soluble	-9.93	5.46e-08	1.17e-10	Poorly soluble	Low	No	Yes	No	No	Yes	Yes	Yes	-7.14	0	1	0	0	0	0.55	0	0	1	4.25
ZINC000045392174	Cc1[nH]nc2ccc(-c3cc(OC[C@@H](N)Cc4ccccc4)cnc3-c3cc(Cl)ccc3O)cc12	C28H25ClN4O2	484.98	35	27	0.14	7	5	3	140.06	97.05	3.45	5.5	5.91	3.26	6.36	4.9	-6.42	0.000184	3.8e-07	Poorly soluble	-7.3	2.45e-05	5.05e-08	Poorly soluble	-10.6	1.23e-08	2.54e-11	Insoluble	Low	No	Yes	No	No	No	Yes	Yes	-5.35	0	3	0	1	1	0.55	0	0	2	4.1
ZINC000045393499	O=P(O)(O)O[C@@H]1[C@@H](P(=O)(O)O)[C@@H](O)[C@H](OP(=O)(O)O)[C@H](O)[C@H]1OP(=O)(O)O	C6H16O17P4	484.08	27	0	1	7	17	10	78.37	337.51	-3.82	-7.58	-3.3	-5.85	-6.92	-5.49	2.4	121000	249	Highly soluble	1.23	8160	16.9	Highly soluble	6.45	1370000000	2830000	Soluble	Low	No	Yes	No	No	No	No	No	-14.63	2	2	1	1	4	0.11	0	1	1	5.82
ZINC000045393503	O=P(O)(O)O[C@H]1[C@H](O)[C@H](P(=O)(O)O)[C@H](OP(=O)(O)O)[C@H](OP(=O)(O)O)[C@H]1O	C6H16O17P4	484.08	27	0	1	7	17	10	78.37	337.51	-3.9	-7.58	-3.3	-5.85	-6.92	-5.51	2.4	121000	249	Highly soluble	1.23	8160	16.9	Highly soluble	6.45	1370000000	2830000	Soluble	Low	No	Yes	No	No	No	No	No	-14.63	2	2	1	1	4	0.11	0	1	1	5.82
ZINC000045393508	O=P(O)(O)O[C@@H]1[C@H](O)[C@H](P(=O)(O)O)[C@@H](OP(=O)(O)O)[C@H](OP(=O)(O)O)[C@H]1O	C6H16O17P4	484.08	27	0	1	7	17	10	78.37	337.51	-3.49	-7.58	-3.3	-5.85	-6.92	-5.43	2.4	121000	249	Highly soluble	1.23	8160	16.9	Highly soluble	6.45	1370000000	2830000	Soluble	Low	No	Yes	No	No	No	No	No	-14.63	2	2	1	1	4	0.11	0	1	1	5.82
ZINC000045393511	O=P(O)(O)O[C@@H]1[C@H](O)[C@H](P(=O)(O)O)[C@H](OP(=O)(O)O)[C@H](OP(=O)(O)O)[C@H]1O	C6H16O17P4	484.08	27	0	1	7	17	10	78.37	337.51	-2.76	-7.58	-3.3	-5.85	-6.92	-5.28	2.4	121000	249	Highly soluble	1.23	8160	16.9	Highly soluble	6.45	1370000000	2830000	Soluble	Low	No	Yes	No	No	No	No	No	-14.63	2	2	1	1	4	0.11	0	1	1	5.82
ZINC000049021646	N[C@H](CNc1ncc(-c2ccc3cn[nH]c3c2)s1)Cc1ccc(C(F)(F)F)cc1	C20H18F3N5S	417.45	29	20	0.2	7	6	3	108.32	107.86	2.54	4.53	5.65	2.92	5.49	4.23	-5.33	0.00195	4.67e-06	Moderately soluble	-6.52	0.000127	3.04e-07	Poorly soluble	-8.19	2.73e-06	6.53e-09	Poorly soluble	Low	No	Yes	No	Yes	Yes	Yes	Yes	-5.63	0	1	0	0	0	0.55	0	0	2	3.69
ZINC000049021803	Cn1nc(N)c2ccc(-c3cnc(NC[C@@H](N)Cc4ccc(C(F)(F)F)cc4)s3)cc21	C21H21F3N6S	446.49	31	20	0.24	7	6	3	117.62	123.02	2.83	4.2	5.25	3.26	4.26	3.96	-5.27	0.0024	5.37e-06	Moderately soluble	-6.49	0.000144	3.21e-07	Poorly soluble	-7.36	1.94e-05	4.36e-08	Poorly soluble	Low	No	Yes	Yes	Yes	Yes	Yes	Yes	-6.04	0	0	0	0	0	0.55	0	0	2	3.9
ZINC000049032804	N[C@H](CNc1nnc(-c2ccc3cnccc3c2)o1)Cc1ccc(C(F)(F)F)cc1	C21H18F3N5O	413.4	30	21	0.19	7	8	2	106.15	89.86	3.15	3.88	5.25	3.1	4.17	3.91	-4.9	0.00516	1.25e-05	Moderately soluble	-5.46	0.00142	3.43e-06	Moderately soluble	-8.55	1.16e-06	2.81e-09	Poorly soluble	High	No	Yes	Yes	Yes	No	Yes	Yes	-6.07	0	0	0	0	0	0.55	0	0	2	3.68
ZINC000049032916	N[C@H](CNc1cc(-c2ccc3cnccc3c2)no1)Cc1ccc(C(F)(F)F)cc1	C22H19F3N4O	412.41	30	21	0.18	7	7	2	108.36	76.97	3.16	4.49	5.85	3.04	4.73	4.25	-5.28	0.00216	5.23e-06	Moderately soluble	-5.83	0.000614	1.49e-06	Moderately soluble	-8.92	4.91e-07	1.19e-09	Poorly soluble	High	No	Yes	Yes	Yes	No	Yes	Yes	-5.63	0	1	0	0	0	0.55	0	0	2	3.72
ZINC000049033246	Nc1cc2cc(-c3cnc(NC[C@@H](N)Cc4ccc(C(F)(F)F)cc4)s3)ccc2cn1	C22H20F3N5S	443.49	31	21	0.18	7	6	3	118.37	118.09	3.24	4.73	5.91	2.91	5.26	4.41	-5.61	0.00109	2.46e-06	Moderately soluble	-6.94	5.1e-05	1.15e-07	Poorly soluble	-8.59	1.14e-06	2.56e-09	Poorly soluble	Low	No	Yes	No	Yes	No	Yes	Yes	-5.65	0	1	0	1	0	0.55	0	0	2	3.81
ZINC000049033462	Cc1n[nH]c2ccc(-c3nnc(NC[C@@H](N)Cc4ccccc4Cl)s3)cc12	C19H19ClN6S	398.91	27	20	0.21	6	4	3	111.09	120.75	2.78	4.09	3.83	2.85	5.03	3.72	-5.04	0.00362	9.08e-06	Moderately soluble	-6.33	0.000186	4.67e-07	Poorly soluble	-7.95	4.52e-06	1.13e-08	Poorly soluble	High	No	Yes	No	Yes	Yes	Yes	Yes	-5.83	0	0	0	0	0	0.55	0	0	2	3.74
ZINC000049033594	Cc1n[nH]c2ccc(-c3nnc(NC[C@@H](N)Cc4cccc(Cl)c4)s3)cc12	C19H19ClN6S	398.91	27	20	0.21	6	4	3	111.09	120.75	2.95	4.09	3.83	2.85	5.03	3.75	-5.04	0.00362	9.08e-06	Moderately soluble	-6.33	0.000186	4.67e-07	Poorly soluble	-7.95	4.52e-06	1.13e-08	Poorly soluble	High	No	Yes	No	Yes	Yes	Yes	Yes	-5.83	0	0	0	0	0	0.55	0	0	2	3.72
ZINC000049033704	N[C@H](CNc1ncc(-c2ccc3c(c2)CNC3=O)s1)Cc1ccc(C(F)(F)F)cc1	C21H19F3N4OS	432.46	30	17	0.24	7	6	3	113.62	108.28	3.13	3.75	4.48	2.8	5.39	3.91	-4.84	0.00624	1.44e-05	Moderately soluble	-5.72	0.000831	1.92e-06	Moderately soluble	-8.15	3.07e-06	7.1e-09	Poorly soluble	High	No	Yes	Yes	Yes	Yes	Yes	Yes	-6.28	0	0	0	0	0	0.55	0	0	2	3.76
ZINC000049034010	Cc1n[nH]c2ccc(-c3nnc(NC[C@@H](N)Cc4ccc(C(F)(F)F)cc4)s3)cc12	C20H19F3N6S	432.47	30	20	0.25	7	7	3	111.08	120.75	2.79	4.34	5.35	3.19	5.46	4.22	-5.29	0.00223	5.17e-06	Moderately soluble	-6.59	0.000111	2.57e-07	Poorly soluble	-8.19	2.82e-06	6.52e-09	Poorly soluble	Low	No	Yes	Yes	Yes	Yes	Yes	Yes	-5.86	0	0	0	0	0	0.55	0	0	2	3.88
ZINC000049034164	N[C@H](CNc1cnc(-c2ccc3cnccc3c2)s1)Cc1ccc(C(F)(F)F)cc1	C22H19F3N4S	428.47	30	21	0.18	7	6	2	113.97	92.07	3.44	5.08	6.32	2.92	5.98	4.75	-5.75	0.000757	1.77e-06	Moderately soluble	-6.76	7.51e-05	1.75e-07	Poorly soluble	-8.96	4.64e-07	1.08e-09	Poorly soluble	Low	No	Yes	Yes	Yes	Yes	Yes	Yes	-5.31	0	1	0	1	1	0.55	0	0	2	3.74
ZINC000049034260	N[C@H](CNc1nnc(-c2ccc3[nH]nc(-c4ccccc4)c3c2)s1)Cc1cccc(C(F)(F)F)c1	C25H21F3N6S	494.53	35	26	0.16	8	7	3	131.55	120.75	3.45	5.6	6.71	4.02	6.48	5.25	-6.46	0.000173	3.5e-07	Poorly soluble	-7.9	6.25e-06	1.26e-08	Poorly soluble	-10.25	2.77e-08	5.61e-11	Insoluble	Low	No	Yes	No	No	Yes	Yes	Yes	-5.34	0	3	0	1	1	0.55	0	0	3	4.17
ZINC000049034262	N[C@H](CNc1nnc(-c2ccc3[nH]ncc3c2)s1)Cc1ccc(F)cc1	C18H17FN6S	368.43	26	20	0.17	6	5	3	101.07	120.75	2.41	3.16	3.43	2.51	4.29	3.16	-4.29	0.019	5.15e-05	Moderately soluble	-5.37	0.00159	4.3e-06	Moderately soluble	-7.25	2.09e-05	5.66e-08	Poorly soluble	High	No	Yes	No	Yes	Yes	Yes	Yes	-6.3	0	0	0	0	0	0.55	0	0	1	3.65
ZINC000049035162	Cn1c(=O)[nH]c2ccc(-c3cnc(NC[C@@H](N)Cc4ccc(C(F)(F)F)cc4)s3)cc21	C21H20F3N5OS	447.48	31	20	0.24	7	6	3	116.04	116.97	3.2	3.72	4.95	2.92	5.12	3.98	-4.97	0.00476	1.06e-05	Moderately soluble	-5.87	0.000607	1.36e-06	Moderately soluble	-7.63	1.06e-05	2.37e-08	Poorly soluble	Low	No	Yes	No	Yes	Yes	Yes	Yes	-6.39	0	0	0	0	0	0.55	0	0	2	3.82
ZINC000049035431	N[C@H](CNc1ncc(-c2ccc3[nH]ncc3c2)s1)Cc1ccc(C(F)(F)F)cc1	C20H18F3N5S	417.45	29	20	0.2	7	6	3	108.32	107.86	2.62	4.53	5.65	2.92	5.49	4.24	-5.33	0.00195	4.67e-06	Moderately soluble	-6.52	0.000127	3.04e-07	Poorly soluble	-8.19	2.73e-06	6.53e-09	Poorly soluble	Low	No	Yes	No	Yes	Yes	Yes	Yes	-5.63	0	1	0	0	0	0.55	0	0	2	3.64
ZINC000049035433	N[C@H](CNc1ncc(-c2ccc3c(c2)CC(=O)N3)s1)Cc1ccc(C(F)(F)F)cc1	C21H19F3N4OS	432.46	30	17	0.24	7	6	3	113.96	108.28	3.16	3.75	4.7	2.8	5.39	3.96	-4.84	0.00624	1.44e-05	Moderately soluble	-5.72	0.000831	1.92e-06	Moderately soluble	-8.15	3.07e-06	7.1e-09	Poorly soluble	High	No	Yes	Yes	Yes	Yes	Yes	Yes	-6.28	0	0	0	0	0	0.55	0	0	2	3.77
ZINC000049035442	N[C@H](CNc1ncc(-c2ccc3c(c2)CCC(=O)N3)s1)Cc1ccc(C(F)(F)F)cc1	C22H21F3N4OS	446.49	31	17	0.27	7	6	3	118.77	108.28	3.33	4.04	5.09	3.02	5.63	4.22	-5.1	0.00357	7.99e-06	Moderately soluble	-6.02	0.000429	9.61e-07	Poorly soluble	-8.41	1.72e-06	3.85e-09	Poorly soluble	High	No	Yes	No	Yes	Yes	Yes	Yes	-6.16	0	0	0	0	0	0.55	0	0	2	3.86
ZINC000049037275	N[C@H](CNc1ncc(-c2ccc3nc(O)sc3c2)s1)Cc1ccc(C(F)(F)F)cc1	C20H17F3N4OS2	450.5	30	20	0.2	7	7	3	113.87	140.54	3.3	5.33	6.09	2.78	6.14	4.73	-6.02	0.000428	9.5e-07	Poorly soluble	-8.03	4.17e-06	9.26e-09	Poorly soluble	-7.64	1.04e-05	2.3e-08	Poorly soluble	Low	No	Yes	No	Yes	Yes	Yes	Yes	-5.26	0	1	1	2	1	0.55	0	0	2	3.84
ZINC000049066471	Cc1n[nH]c2ccc(-c3nnc(NC[C@@H](N)Cc4ccccc4F)s3)cc12	C19H19FN6S	382.46	27	20	0.21	6	5	3	106.03	120.75	2.6	3.56	3.74	2.74	4.81	3.49	-4.61	0.00947	2.48e-05	Moderately soluble	-5.78	0.000633	1.66e-06	Moderately soluble	-7.62	9.11e-06	2.38e-08	Poorly soluble	High	No	Yes	No	Yes	Yes	Yes	Yes	-6.11	0	0	0	0	0	0.55	0	0	2	3.8
ZINC000049068716	COc1cc2ncc3c(N)nc(-c4cncc(OC[C@H](N)CC(C)C)c4)cc3c2cc1OC	C25H29N5O3	447.53	33	20	0.32	8	7	2	130.9	118.4	3.51	3.34	4.2	1.22	4.06	3.27	-4.64	0.0103	2.29e-05	Moderately soluble	-5.5	0.0014	3.14e-06	Moderately soluble	-7.99	4.63e-06	1.04e-08	Poorly soluble	High	No	Yes	No	Yes	Yes	Yes	Yes	-6.66	0	1	0	0	0	0.55	0	1	2	4.23
ZINC000049069022	COc1cc2ncc3c(N)nc(-c4cncc(OC[C@@H](N)CC(C)C)c4)cc3c2cc1OC	C25H29N5O3	447.53	33	20	0.32	8	7	2	130.9	118.4	3.56	3.34	4.2	1.22	4.06	3.28	-4.64	0.0103	2.29e-05	Moderately soluble	-5.5	0.0014	3.14e-06	Moderately soluble	-7.99	4.63e-06	1.04e-08	Poorly soluble	High	No	Yes	No	Yes	Yes	Yes	Yes	-6.66	0	1	0	0	0	0.55	0	1	2	4.23
ZINC000049072564	COc1cc2ncc3c(N)nc(-c4cncc(OCCN)c4)cc3c2cc1OC	C21H21N5O3	391.42	29	20	0.19	6	7	2	111.67	118.4	2.77	1.59	2.79	0.36	2.81	2.06	-3.38	0.162	0.000414	Soluble	-3.69	0.0804	0.000205	Soluble	-7.17	2.67e-05	6.82e-08	Poorly soluble	High	No	Yes	Yes	No	Yes	Yes	Yes	-7.56	0	0	0	0	0	0.55	0	1	1	3.34
ZINC000049072566	COc1cc2ncc3c(N)nc(-c4cncc(OC[C@H](C)N)c4)cc3c2cc1OC	C22H23N5O3	405.45	30	20	0.23	6	7	2	116.48	118.4	3.07	2.02	3.18	0.58	3.03	2.38	-3.72	0.0766	0.000189	Soluble	-4.13	0.0298	7.35e-05	Moderately soluble	-7.18	2.65e-05	6.55e-08	Poorly soluble	High	No	Yes	Yes	No	Yes	Yes	Yes	-7.34	0	0	0	0	0	0.55	0	1	1	3.9
ZINC000049088028	COc1cc2ncc3c(N)nc(-c4cncc(OC[C@@H](N)Cc5ccncc5)c4)cc3c2cc1OC	C27H26N6O3	482.53	36	26	0.19	8	8	2	138.76	131.29	3.34	2.54	3.8	0.63	3.9	2.84	-4.44	0.0176	3.64e-05	Moderately soluble	-4.94	0.00549	1.14e-05	Moderately soluble	-9.27	2.59e-07	5.37e-10	Poorly soluble	Low	No	Yes	No	No	Yes	Yes	Yes	-7.44	0	2	0	0	0	0.55	0	1	2	4.22
ZINC000049088183	CCn1c(-c2nonc2N)nc2c(C#CC(C)(C)O)nc(CCCN)cc21	C18H23N7O2	369.42	27	14	0.44	5	7	3	102.14	141.9	3.14	-0.3	1.18	0.58	1.52	1.23	-2	3.74	0.0101	Very soluble	-2.22	2.23	0.00603	Soluble	-4.27	0.02	5.42e-05	Moderately soluble	High	No	Yes	No	No	No	No	No	-8.77	0	0	1	1	0	0.55	0	1	1	3.87
ZINC000049088194	CCn1c(-c2nonc2N)nc2c(C#CC(C)(C)O)nc(CN)cc21	C16H19N7O2	341.37	25	14	0.38	3	7	3	92.52	141.9	2.67	-1.12	0.6	0.1	0.74	0.6	-1.47	11.6	0.0341	Very soluble	-1.37	14.6	0.0428	Very soluble	-3.48	0.114	0.000334	Soluble	Low	No	Yes	No	No	No	No	No	-9.18	0	0	1	1	0	0.55	0	1	0	3.66
ZINC000049088197	CCn1c(-c2nonc2N)nc2c(C#CC(C)(C)O)nc(CNC)cc21	C17H21N7O2	355.39	26	14	0.41	4	7	3	97.42	127.91	3.39	-0.61	0.86	0.34	1.2	1.04	-1.79	5.72	0.0161	Very soluble	-1.6	8.84	0.0249	Very soluble	-4.26	0.0194	5.45e-05	Moderately soluble	High	No	Yes	Yes	No	No	No	No	-8.9	0	0	0	0	0	0.55	0	1	1	3.72
ZINC000049088230	CCn1c(-c2nonc2N)nc2c(C#CC(C)(C)O)nc(OC[C@@H](N)Cc3ccccc3)cc21	C24H27N7O3	461.52	34	20	0.33	7	8	3	128.15	151.13	3.96	1.37	2.24	1.59	2.38	2.31	-3.54	0.134	0.00029	Soluble	-4.15	0.0329	7.14e-05	Moderately soluble	-6.08	0.00038	8.24e-07	Poorly soluble	Low	No	Yes	Yes	No	No	No	Yes	-8.14	0	0	1	1	1	0.55	0	1	1	4.68
ZINC000049088379	CCn1c(-c2nonc2N)nc2c(C#CC(C)(C)O)nc(OCCNC)cc21	C18H23N7O3	385.42	28	14	0.44	6	8	3	103.76	137.14	3.85	-0.14	0.89	0.49	1.15	1.25	-2.12	2.95	0.00767	Soluble	-2.29	2	0.00518	Soluble	-4.39	0.0158	4.1e-05	Moderately soluble	High	No	Yes	No	No	No	No	No	-8.75	0	0	0	1	0	0.55	0	1	1	3.87
ZINC000049089232	N[C@H](CNc1ncc(-c2ccc3nnn(N)c3c2)s1)Cc1ccc(C(F)(F)F)cc1	C19H18F3N7S	433.45	30	20	0.21	7	7	3	109.89	135.91	2.77	3.84	4.24	2.98	3.18	3.4	-4.98	0.00456	1.05e-05	Moderately soluble	-6.39	0.000177	4.07e-07	Poorly soluble	-6.61	0.000105	2.43e-07	Poorly soluble	Low	No	No	No	Yes	No	No	Yes	-6.22	0	0	0	1	0	0.55	0	0	2	3.87
ZINC000049089465	CCn1c(-c2nonc2N)nc2c(C#CC(C)(C)O)nc(O[C@@H](CN)c3ccccc3)cc21	C23H25N7O3	447.49	33	20	0.3	6	8	3	123.34	151.13	3.41	0.88	2.05	1.38	1.98	1.94	-3.22	0.269	0.000601	Soluble	-3.64	0.103	0.00023	Soluble	-5.69	0.000907	2.03e-06	Moderately soluble	Low	No	Yes	No	No	No	No	No	-8.4	0	0	1	1	1	0.55	0	1	1	4.6
ZINC000049089532	COc1cc2ncc3c(N)nc(-c4cncc(OC[C@@H](N)Cc5cccc(Cl)c5)c4)cc3c2cc1OC	C28H26ClN5O3	515.99	37	26	0.18	8	7	2	145.97	118.4	3.75	4.24	5.05	2.07	5.12	4.05	-5.7	0.00102	1.98e-06	Moderately soluble	-6.44	0.000188	3.65e-07	Poorly soluble	-10.22	3.1e-08	6.01e-11	Insoluble	Low	No	Yes	Yes	Yes	Yes	Yes	Yes	-6.44	1	2	0	0	0	0.55	0	1	3	4.24
ZINC000049089535	CCn1c(-c2nonc2N)nc2c(C#CC(C)(C)O)nc(OC[C@@H](N)c3ccccc3)cc21	C23H25N7O3	447.49	33	20	0.3	6	8	3	123.34	151.13	3.68	0.88	2.05	1.38	1.98	1.99	-3.22	0.269	0.000601	Soluble	-3.64	0.103	0.00023	Soluble	-5.69	0.000907	2.03e-06	Moderately soluble	Low	No	Yes	Yes	No	No	No	No	-8.4	0	0	1	1	1	0.55	0	1	1	4.58
ZINC000049089536	COc1cc2ncc3c(N)nc(-c4cncc(OC[C@@H](C)N)c4)cc3c2cc1OC	C22H23N5O3	405.45	30	20	0.23	6	7	2	116.48	118.4	2.92	2.02	3.18	0.58	3.03	2.35	-3.72	0.0766	0.000189	Soluble	-4.13	0.0298	7.35e-05	Moderately soluble	-7.18	2.65e-05	6.55e-08	Poorly soluble	High	No	Yes	Yes	No	Yes	Yes	Yes	-7.34	0	0	0	0	0	0.55	0	1	1	3.9
ZINC000049089564	CCn1c(-c2nonc2N)nc2c(C#CC(C)(C)O)nc(OC[C@H](N)c3ccccc3)cc21	C23H25N7O3	447.49	33	20	0.3	6	8	3	123.34	151.13	3.76	0.88	2.05	1.38	1.98	2.01	-3.22	0.269	0.000601	Soluble	-3.64	0.103	0.00023	Soluble	-5.69	0.000907	2.03e-06	Moderately soluble	Low	No	Yes	Yes	No	No	No	No	-8.4	0	0	1	1	1	0.55	0	1	1	4.58
ZINC000049089587	COc1cc2ncc3c(N)nc(-c4cncc(OC[C@@H](N)Cc5ccc(F)cc5)c4)cc3c2cc1OC	C28H26FN5O3	499.54	37	26	0.18	8	8	2	140.92	118.4	3.42	3.71	4.96	1.98	4.9	3.79	-5.27	0.0027	5.41e-06	Moderately soluble	-5.89	0.000647	1.3e-06	Moderately soluble	-9.9	6.25e-08	1.25e-10	Poorly soluble	Low	No	Yes	Yes	No	Yes	Yes	Yes	-6.71	0	2	0	0	0	0.55	0	1	3	4.23
ZINC000049089588	COc1cc2ncc3c(N)nc(-c4cncc(OC[C@H](N)Cc5ccc(F)cc5)c4)cc3c2cc1OC	C28H26FN5O3	499.54	37	26	0.18	8	8	2	140.92	118.4	3.82	3.71	4.96	1.98	4.9	3.87	-5.27	0.0027	5.41e-06	Moderately soluble	-5.89	0.000647	1.3e-06	Moderately soluble	-9.9	6.25e-08	1.25e-10	Poorly soluble	Low	No	Yes	Yes	No	Yes	Yes	Yes	-6.71	0	2	0	0	0	0.55	0	1	3	4.23
ZINC000049089594	CCn1c(-c2nonc2N)nc2c(C#CC(C)(C)O)nc(O[C@H](CN)c3ccccc3)cc21	C23H25N7O3	447.49	33	20	0.3	6	8	3	123.34	151.13	3.61	0.88	2.05	1.38	1.98	1.98	-3.22	0.269	0.000601	Soluble	-3.64	0.103	0.00023	Soluble	-5.69	0.000907	2.03e-06	Moderately soluble	Low	No	Yes	Yes	No	No	No	No	-8.4	0	0	1	1	1	0.55	0	1	1	4.6
ZINC000049089596	Nc1noc2ccc(-c3cnc(NC[C@@H](N)Cc4ccc(C(F)(F)F)cc4)s3)cc12	C20H18F3N5OS	433.45	30	20	0.2	7	7	3	110.64	131.23	3.01	4.34	5.5	2.78	4.65	4.06	-5.29	0.00221	5.09e-06	Moderately soluble	-6.81	6.7e-05	1.55e-07	Poorly soluble	-7.82	6.64e-06	1.53e-08	Poorly soluble	Low	No	Yes	Yes	Yes	Yes	Yes	Yes	-5.86	0	0	0	0	0	0.55	0	0	2	3.97
ZINC000049089603	CCn1c(-c2nonc2N)nc2c(C#CC(C)(C)O)nc(OCCN)cc21	C17H21N7O3	371.39	27	14	0.41	5	8	3	98.86	151.13	3.35	-0.65	0.63	0.25	0.69	0.85	-1.79	6.07	0.0163	Very soluble	-2.05	3.31	0.0089	Soluble	-3.6	0.0933	0.000251	Soluble	Low	No	Yes	No	No	No	No	No	-9.03	0	0	1	1	1	0.55	0	1	1	3.8
ZINC000049089636	Cc1n[nH]c2ccc(-c3nnc(NC[C@@H](N)Cc4ccccc4C(F)(F)F)s3)cc12	C20H19F3N6S	432.47	30	20	0.25	7	7	3	111.08	120.75	2.7	4.34	5.35	3.19	5.46	4.21	-5.29	0.00223	5.17e-06	Moderately soluble	-6.59	0.000111	2.57e-07	Poorly soluble	-8.19	2.82e-06	6.52e-09	Poorly soluble	Low	No	Yes	Yes	Yes	Yes	Yes	Yes	-5.86	0	0	0	0	0	0.55	0	0	2	3.93
ZINC000049089680	N[C@H](CNc1nnc(-c2ccc3[nH]nc(C4CC4)c3c2)s1)Cc1ccc(C(F)(F)F)cc1	C22H21F3N6S	458.5	32	20	0.32	8	7	3	118.58	120.75	2.99	4.52	5.86	3.61	5.89	4.57	-5.46	0.00157	3.43e-06	Moderately soluble	-6.78	7.66e-05	1.67e-07	Poorly soluble	-8.37	1.94e-06	4.24e-09	Poorly soluble	Low	No	Yes	Yes	Yes	Yes	Yes	Yes	-5.89	0	1	0	0	0	0.55	0	0	3	4.07
ZINC000049089709	N[C@H](CNc1ncc(-c2ccc3cnccc3c2)s1)Cc1ccc(C(F)(F)F)cc1	C22H19F3N4S	428.47	30	21	0.18	7	6	2	113.97	92.07	3.34	5.08	6.32	3.06	5.98	4.76	-5.75	0.000757	1.77e-06	Moderately soluble	-6.76	7.51e-05	1.75e-07	Poorly soluble	-8.96	4.64e-07	1.08e-09	Poorly soluble	Low	No	Yes	Yes	Yes	Yes	Yes	Yes	-5.31	0	1	0	1	1	0.55	0	0	2	3.71
ZINC000049089719	Cn1ncc2ccc(-c3cnc(NC[C@@H](N)Cc4ccc(C(F)(F)F)cc4)s3)cc21	C21H20F3N5S	431.48	30	20	0.24	7	6	2	113.22	97	3.46	4.55	5.66	3.13	4.97	4.36	-5.41	0.00167	3.86e-06	Moderately soluble	-6.31	0.000211	4.9e-07	Poorly soluble	-7.73	7.96e-06	1.85e-08	Poorly soluble	High	No	Yes	No	Yes	Yes	Yes	Yes	-5.7	0	1	0	0	0	0.55	0	0	2	3.79
ZINC000049089725	N[C@H](CNc1ncc(-c2ccc3nc(O)oc3c2)s1)Cc1ccc(C(F)(F)F)cc1	C20H17F3N4O2S	434.43	30	20	0.2	7	8	3	108.26	125.44	3.14	4.72	5.62	2.37	4.89	4.15	-5.54	0.00126	2.89e-06	Moderately soluble	-7.08	3.59e-05	8.25e-08	Poorly soluble	-7.6	1.1e-05	2.52e-08	Poorly soluble	Low	No	Yes	Yes	Yes	Yes	Yes	Yes	-5.6	0	1	0	0	0	0.55	0	0	2	3.96
ZINC000049089745	CCc1n[nH]c2ccc(-c3nnc(NC[C@@H](N)Cc4ccccc4)s3)cc12	C20H22N6S	378.49	27	20	0.25	7	4	3	110.88	120.75	2.54	3.89	3.43	2.58	4.77	3.44	-4.72	0.00715	1.89e-05	Moderately soluble	-6.12	0.000285	7.52e-07	Poorly soluble	-7.75	6.7e-06	1.77e-08	Poorly soluble	High	No	Yes	No	Yes	Yes	Yes	Yes	-5.85	0	0	0	0	0	0.55	0	0	2	3.86
ZINC000049089945	N[C@H](CCc1nc(-c2ccc3cnccc3c2)no1)Cc1ccc(C(F)(F)F)cc1	C22H19F3N4O	412.41	30	21	0.23	7	8	1	106.62	77.83	3.63	4.6	5.96	3.04	5.34	4.51	-5.35	0.00184	4.46e-06	Moderately soluble	-5.96	0.000453	1.1e-06	Moderately soluble	-8.9	5.13e-07	1.24e-09	Poorly soluble	High	No	Yes	Yes	No	Yes	Yes	Yes	-5.55	0	1	0	1	0	0.55	0	0	2	3.71
ZINC000049110190	Cc1n[nH]c2ccc(-c3nnc(NC[C@@H](N)Cc4ccc(Cl)cc4Cl)s3)cc12	C19H18Cl2N6S	433.36	28	20	0.21	6	4	3	116.1	120.75	2.81	4.71	4.49	3.34	5.67	4.2	-5.63	0.00102	2.36e-06	Moderately soluble	-6.97	4.6e-05	1.06e-07	Poorly soluble	-8.53	1.28e-06	2.94e-09	Poorly soluble	High	No	Yes	No	Yes	Yes	Yes	Yes	-5.6	0	0	0	0	0	0.55	0	0	2	3.78
ZINC000049110909	Cc1cc2cc(-c3nnc(NC[C@@H](N)Cc4ccc(C(F)(F)F)cc4)s3)ccc2cn1	C22H20F3N5S	443.49	31	21	0.23	7	7	2	116.73	104.96	3.51	4.89	6.02	3.31	5.94	4.73	-5.71	0.000865	1.95e-06	Moderately soluble	-6.83	6.56e-05	1.48e-07	Poorly soluble	-8.96	4.81e-07	1.08e-09	Poorly soluble	Low	No	Yes	Yes	Yes	Yes	Yes	Yes	-5.53	0	1	0	1	0	0.55	0	0	2	3.88
ZINC000049112034	COc1cc2ncc3c(N)nc(-c4cncc(OC[C@@H](N)Cc5c[nH]c6ccccc56)c4)cc3c2cc1OC	C30H28N6O3	520.58	39	29	0.17	8	7	3	152.82	134.19	3.02	3.74	4.88	1.35	5	3.6	-5.45	0.00186	3.58e-06	Moderately soluble	-6.25	0.000293	5.62e-07	Poorly soluble	-10.48	1.7e-08	3.27e-11	Insoluble	Low	No	Yes	No	Yes	Yes	Yes	Yes	-6.82	1	2	0	1	0	0.55	0	1	3	4.44
ZINC000049112066	Cc1n[nH]c2ccc(-c3nnc(NC[C@@H](N)Cc4ccccc4)s3)cc12	C19H20N6S	364.47	26	20	0.21	6	4	3	106.08	120.75	2.62	3.46	3.18	2.36	4.39	3.2	-4.45	0.0129	3.53e-05	Moderately soluble	-5.68	0.000766	2.1e-06	Moderately soluble	-7.36	1.6e-05	4.39e-08	Poorly soluble	High	No	Yes	No	Yes	Yes	Yes	Yes	-6.07	0	0	0	0	0	0.55	0	0	1	3.73
ZINC000049112069	CC[C@@H](N)COc1cncc(-c2cc3c(cnc4cc(OC)c(OC)cc43)c(N)n2)c1	C23H25N5O3	419.48	31	20	0.26	7	7	2	121.28	118.4	3.48	2.55	3.57	0.8	3.42	2.76	-4.06	0.0363	8.66e-05	Moderately soluble	-4.68	0.00869	2.07e-05	Moderately soluble	-7.58	1.11e-05	2.65e-08	Poorly soluble	High	No	Yes	Yes	No	Yes	Yes	Yes	-7.05	0	0	0	0	0	0.55	0	1	1	4.01
ZINC000049112655	N[C@H](CNc1ncc(-c2ccc3nnccc3c2)s1)Cc1ccc(C(F)(F)F)cc1	C21H18F3N5S	429.46	30	21	0.19	7	7	2	111.76	104.96	3.27	4.16	5.72	3.1	5.42	4.33	-5.18	0.00284	6.62e-06	Moderately soluble	-6.07	0.000364	8.47e-07	Poorly soluble	-8.59	1.1e-06	2.56e-09	Poorly soluble	Low	No	Yes	Yes	Yes	Yes	Yes	Yes	-5.97	0	1	0	0	0	0.55	0	0	2	3.7
ZINC000049113244	CCn1c(-c2nonc2N)nc2c(C#CC(C)(C)O)nc(OC[C@H](C)N)cc21	C18H23N7O3	385.42	28	14	0.44	5	8	3	103.66	151.13	3.54	-0.22	1.02	0.49	0.91	1.15	-2.13	2.85	0.0074	Soluble	-2.5	1.23	0.00319	Soluble	-3.62	0.0925	0.00024	Soluble	Low	No	Yes	Yes	No	No	No	No	-8.81	0	0	1	1	1	0.55	0	1	1	4.35
ZINC000049113283	CCn1c(-c2nonc2N)nc2c(C#CC(C)(C)O)nc(CN3CCCC3)cc21	C20H25N7O2	395.46	29	14	0.5	4	7	2	113.74	119.12	3.55	0.34	1.36	1.04	1.79	1.62	-2.6	0.995	0.00252	Soluble	-2.41	1.55	0.00393	Soluble	-4.24	0.0228	5.75e-05	Moderately soluble	High	No	Yes	No	No	Yes	No	No	-8.47	0	0	0	0	0	0.55	0	1	1	3.92
ZINC000049113411	COc1cc2ncc3c(N)nc(-c4cncc(OC[C@@H](N)Cc5ccccc5Cl)c4)cc3c2cc1OC	C28H26ClN5O3	515.99	37	26	0.18	8	7	2	145.97	118.4	3.99	4.24	5.05	2.07	5.12	4.1	-5.7	0.00102	1.98e-06	Moderately soluble	-6.44	0.000188	3.65e-07	Poorly soluble	-10.22	3.1e-08	6.01e-11	Insoluble	Low	No	Yes	Yes	No	Yes	Yes	Yes	-6.44	1	2	0	0	0	0.55	0	1	3	4.27
ZINC000049113709	COc1cc2ncc3c(N)nc(-c4cncc(OC[C@H](N)Cc5c[nH]c6ccccc56)c4)cc3c2cc1OC	C30H28N6O3	520.58	39	29	0.17	8	7	3	152.82	134.19	3.25	3.74	4.88	1.35	5	3.65	-5.45	0.00186	3.58e-06	Moderately soluble	-6.25	0.000293	5.62e-07	Poorly soluble	-10.48	1.7e-08	3.27e-11	Insoluble	Low	No	Yes	No	Yes	Yes	Yes	Yes	-6.82	1	2	0	1	0	0.55	0	1	3	4.44
ZINC000049125123	CCn1c(-c2nonc2N)nc2c(C#CC(C)(C)O)nc(OC[C@@H](C)N)cc21	C18H23N7O3	385.42	28	14	0.44	5	8	3	103.66	151.13	3.55	-0.22	1.02	0.49	0.91	1.15	-2.13	2.85	0.0074	Soluble	-2.5	1.23	0.00319	Soluble	-3.62	0.0925	0.00024	Soluble	Low	No	Yes	Yes	No	No	No	No	-8.81	0	0	1	1	1	0.55	0	1	1	4.35
ZINC000049126184	CCn1c(-c2nonc2N)nc2c(C#CC(C)(C)O)nc(CN(C)C)cc21	C18H23N7O2	369.42	27	14	0.44	4	7	2	102.33	119.12	3.41	-0.15	1.2	0.58	1.15	1.24	-2.16	2.58	0.00699	Soluble	-1.9	4.68	0.0127	Very soluble	-3.93	0.0438	0.000119	Soluble	High	No	Yes	No	No	No	No	No	-8.66	0	0	0	0	0	0.55	0	1	1	3.83
ZINC000049708820	O=c1[nH]c2ccccc2n1C1CCN(Cc2ccc(-c3nc4cc(-n5cnnn5)ccc4nc3-c3ccccc3)cc2)CC1	C34H29N9O	579.65	44	36	0.18	6	7	1	173.72	110.41	4.41	4.74	4.89	4.19	4.23	4.49	-6.63	0.000136	2.35e-07	Poorly soluble	-6.79	9.43e-05	1.63e-07	Poorly soluble	-10.88	7.59e-09	1.31e-11	Insoluble	High	No	Yes	No	No	Yes	No	No	-6.47	2	3	0	0	1	0.17	0	0	2	4.47
ZINC000049709921	O=c1[nH]c2ccccc2n1C1CCN(Cc2ccc(-c3nc4ccc(-n5cnnn5)cc4nc3-c3ccccc3)cc2)CC1	C34H29N9O	579.65	44	36	0.18	6	7	1	173.72	110.41	4.17	4.74	4.89	4.19	4.23	4.44	-6.63	0.000136	2.35e-07	Poorly soluble	-6.79	9.43e-05	1.63e-07	Poorly soluble	-10.88	7.59e-09	1.31e-11	Insoluble	High	No	Yes	No	No	Yes	No	No	-6.47	2	3	0	0	1	0.17	0	0	2	4.47
ZINC000049723090	O=c1[nH]c2ccccc2n1C1CCN(Cc2ccc(-c3nc4ccc(Cn5cnnn5)cc4nc3-c3ccccc3)cc2)CC1	C35H31N9O	593.68	45	36	0.2	7	7	1	178.13	110.41	4.5	4.68	4.95	4.1	4.63	4.57	-6.6	0.000149	2.52e-07	Poorly soluble	-6.73	0.000112	1.88e-07	Poorly soluble	-11.27	3.2e-09	5.38e-12	Insoluble	High	No	No	Yes	Yes	Yes	No	No	-6.6	1	3	0	0	1	0.55	0	0	2	4.56
ZINC000049756567	Cc1occc1-c1nc(N)c(OC[C@@H](N)Cc2c(C(N)=O)[nH]c3ccccc23)cc1-c1cnc2[nH]nc(C)c2n1	C28H27N9O3	537.57	40	29	0.18	8	8	5	150.21	200.64	1.69	2	3.41	0	4	2.22	-4.44	0.0195	3.62e-05	Moderately soluble	-5.84	0.000777	1.45e-06	Moderately soluble	-9.47	1.83e-07	3.4e-10	Poorly soluble	Low	No	No	Yes	Yes	No	No	No	-8.16	2	2	1	1	1	0.17	0	0	2	4.83
ZINC000049756821	Cc1occc1-c1nc(N)c(OC[C@@H](N)Cc2c(Cl)[nH]c3ccccc23)cc1-c1cnc2[nH]nc(C)c2n1	C27H25ClN8O2	528.99	38	29	0.19	7	7	4	147.12	157.55	2.59	3.75	4.97	1.18	5.41	3.58	-5.58	0.00138	2.6e-06	Moderately soluble	-6.75	9.38e-05	1.77e-07	Poorly soluble	-10.5	1.66e-08	3.13e-11	Insoluble	Low	No	Yes	Yes	Yes	Yes	No	Yes	-6.86	1	2	1	1	1	0.55	0	0	2	4.7
ZINC000049757013	CC1=NN(C(=O)c2ccc(Cl)cc2)C(=O)[C@H]1/N=N/c1ccc(S(=O)(=O)N(C)c2ncccn2)cc1	C22H18ClN7O4S	511.94	35	18	0.14	7	9	0	135.48	146	3.03	3.15	3.79	1.6	2.48	2.81	-4.92	0.0062	1.21e-05	Moderately soluble	-5.89	0.000666	1.3e-06	Moderately soluble	-7.05	4.56e-05	8.91e-08	Poorly soluble	Low	No	No	No	Yes	Yes	No	Yes	-7.19	2	2	1	1	0	0.17	1	2	1	4.24
ZINC000049757223	CC1=NN(C(=O)c2ccc(C(C)(C)C)cc2)C(=O)[C@@H]1/N=N/c1ccc(S(=O)(=O)Nc2ncccn2)cc1	C25H25N7O4S	519.58	37	18	0.24	8	9	1	144.84	154.79	3.16	4.01	4.21	1.75	3.28	3.28	-5.42	0.00198	3.8e-06	Moderately soluble	-6.96	5.66e-05	1.09e-07	Poorly soluble	-7.96	5.66e-06	1.09e-08	Poorly soluble	Low	No	No	No	No	Yes	No	Yes	-6.62	2	2	1	1	1	0.17	1	2	3	4.57
ZINC000049757224	CC1=NN(C(=O)c2ccc(N)cc2)C(=O)[C@@H]1/N=N/c1ccc(S(=O)(=O)Nc2ncccn2)cc1	C21H18N8O4S	478.48	34	18	0.1	7	9	2	129.97	180.81	2.05	1.65	2.51	0.41	1.18	1.56	-3.78	0.0802	0.000168	Soluble	-5.06	0.00416	8.7e-06	Moderately soluble	-6.44	0.000173	3.62e-07	Poorly soluble	Low	No	No	No	No	No	No	Yes	-8.05	1	0	1	1	1	0.55	1	3	1	4.22
ZINC000049757449	CC1=NN(C(=O)c2ccc(O)cc2)C(=O)[C@@H]1/N=N/c1ccc(S(=O)(=O)Nc2ncccn2)cc1	C21H17N7O5S	479.47	34	18	0.1	7	10	2	127.59	175.02	2.01	1.98	2.62	0.41	1.41	1.69	-3.99	0.0491	0.000102	Soluble	-5.28	0.00251	5.23e-06	Moderately soluble	-6.22	0.000286	5.97e-07	Poorly soluble	Low	No	No	No	No	No	No	No	-7.82	1	0	1	1	1	0.55	1	2	1	4.14
ZINC000049757505	CC1=NN(C(=O)c2ccccc2)C(=O)[C@@H]1/N=N/c1ccc(S(=O)(=O)Nc2ncccn2)cc1	C21H17N7O4S	463.47	33	18	0.1	7	9	1	125.57	154.79	2.03	2.33	2.92	0.89	1.88	2.01	-4.12	0.0349	7.53e-05	Moderately soluble	-5.22	0.0028	6.03e-06	Moderately soluble	-6.82	7.08e-05	1.53e-07	Poorly soluble	Low	No	No	No	No	No	No	No	-7.47	1	0	1	1	1	0.55	1	2	1	4.15
ZINC000049757506	CCCCCCCCCC(=O)Nc1ccc(S(=O)(=O)Nc2nncs2)cc1	C18H26N4O3S2	410.55	27	11	0.5	13	5	2	109.79	137.67	3.15	4.48	5.12	1.88	3.78	3.68	-4.65	0.00916	2.23e-05	Moderately soluble	-7.09	3.33e-05	8.11e-08	Poorly soluble	-6.95	4.56e-05	1.11e-07	Poorly soluble	Low	No	No	No	Yes	Yes	Yes	Yes	-5.62	0	0	1	1	0	0.55	0	0	3	3.5
ZINC000049757540	CCCCCCCCCCCCc1ccc(S(=O)(=O)Nc2nncs2)cc1	C20H31N3O2S2	409.61	27	11	0.6	14	4	1	114.87	108.57	4.29	7.44	6.69	3.35	5.78	5.51	-6.44	0.000147	3.6e-07	Poorly soluble	-9.55	1.15e-07	2.81e-10	Poorly soluble	-8.17	2.78e-06	6.78e-09	Poorly soluble	Low	No	No	Yes	Yes	Yes	No	Yes	-3.52	0	1	1	1	1	0.55	0	0	3	3.97
ZINC000049767032	CC1=NN(C(=O)c2ccc(Cl)cc2)C(=O)[C@H]1/N=N/c1ccc(S(=O)(=O)Nc2ncccn2)cc1	C21H16ClN7O4S	497.91	34	18	0.1	7	9	1	130.58	154.79	2.66	2.96	3.57	1.38	2.53	2.62	-4.72	0.00945	1.9e-05	Moderately soluble	-5.87	0.000666	1.34e-06	Moderately soluble	-7.39	2.01e-05	4.04e-08	Poorly soluble	Low	No	No	No	Yes	Yes	No	Yes	-7.24	1	2	1	1	1	0.55	1	2	1	4.12
ZINC000049783649	CCn1c(-c2nonc2N)nc2c(C#CC(C)(C)O)nc(CCN)cc21	C17H21N7O2	355.39	26	14	0.41	4	7	3	97.33	141.9	2.91	-0.66	0.79	0.34	1.13	0.9	-1.76	6.15	0.0173	Very soluble	-1.85	5.06	0.0142	Very soluble	-3.87	0.0478	0.000135	Soluble	High	No	Yes	No	No	No	No	No	-8.94	0	0	1	1	0	0.55	0	1	1	3.77
ZINC000049783904	COc1cc2ncc3c(N)nc(-c4cncc(OC[C@@H](N)Cc5ccc(Cl)c(Cl)c5)c4)cc3c2cc1OC	C28H25Cl2N5O3	550.44	38	26	0.18	8	7	2	150.98	118.4	3.76	4.87	5.71	2.53	5.76	4.53	-6.3	0.000276	5.02e-07	Poorly soluble	-7.09	4.46e-05	8.11e-08	Poorly soluble	-10.79	8.82e-09	1.6e-11	Insoluble	Low	No	Yes	Yes	No	Yes	Yes	Yes	-6.2	1	3	0	0	0	0.55	0	1	3	4.26
ZINC000049784022	CCn1c(-c2nonc2N)nc2c(C#CC(C)(C)O)nc(OCCCN)cc21	C18H23N7O3	385.42	28	14	0.44	6	8	3	103.66	151.13	3.26	-0.3	1.02	0.49	1.08	1.11	-2.01	3.73	0.00967	Soluble	-2.41	1.49	0.00386	Soluble	-3.99	0.0391	0.000101	Soluble	Low	No	Yes	No	No	No	No	No	-8.86	0	0	1	1	1	0.55	0	1	1	3.91
ZINC000049784029	CCn1c(-c2nonc2N)nc2c(C#CC(C)(C)O)nc(OCCCCN)cc21	C19H25N7O3	399.45	29	14	0.47	7	8	3	108.47	151.13	3.31	0.06	1.41	0.72	1.48	1.39	-2.25	2.25	0.00563	Soluble	-2.79	0.652	0.00163	Soluble	-4.39	0.0164	4.1e-05	Moderately soluble	Low	No	Yes	No	No	No	No	No	-8.69	0	0	1	1	1	0.55	0	1	1	4.03
ZINC000049784558	CC[C@H](N)COc1cncc(-c2cc3c(cnc4cc(OC)c(OC)cc43)c(N)n2)c1	C23H25N5O3	419.48	31	20	0.26	7	7	2	121.28	118.4	3.19	2.55	3.57	0.8	3.42	2.71	-4.06	0.0363	8.66e-05	Moderately soluble	-4.68	0.00869	2.07e-05	Moderately soluble	-7.58	1.11e-05	2.65e-08	Poorly soluble	High	No	Yes	Yes	No	Yes	Yes	Yes	-7.05	0	0	0	0	0	0.55	0	1	1	4.01
ZINC000049784728	COc1cc2ncc3c(N)nc(-c4cncc(OC[C@@H](N)Cc5cccc(C(F)(F)F)c5)c4)cc3c2cc1OC	C29H26F3N5O3	549.54	40	26	0.21	9	10	2	145.97	118.4	3.66	4.49	6.57	2.09	5.58	4.48	-5.96	0.000599	1.09e-06	Moderately soluble	-6.7	0.00011	2.01e-07	Poorly soluble	-10.45	1.95e-08	3.54e-11	Insoluble	Low	No	Yes	Yes	No	Yes	Yes	Yes	-6.46	1	3	0	1	0	0.55	0	1	3	4.36
ZINC000049784862	COc1cc2ncc3c(N)nc(-c4cncc(OC[C@H](N)Cc5cccc(C(F)(F)F)c5)c4)cc3c2cc1OC	C29H26F3N5O3	549.54	40	26	0.21	9	10	2	145.97	118.4	4.02	4.49	6.57	2.09	5.58	4.55	-5.96	0.000599	1.09e-06	Moderately soluble	-6.7	0.00011	2.01e-07	Poorly soluble	-10.45	1.95e-08	3.54e-11	Insoluble	Low	No	Yes	Yes	No	Yes	Yes	Yes	-6.46	1	3	0	1	0	0.55	0	1	3	4.36
ZINC000049785711	CCn1c(-c2nonc2N)nc2c(C#CC(C)(C)O)nc(O[C@H](CCN)c3ccccc3)cc21	C24H27N7O3	461.52	34	20	0.33	7	8	3	128.15	151.13	3.77	1.23	2.44	1.59	2.38	2.28	-3.45	0.164	0.000355	Soluble	-4	0.046	9.97e-05	Moderately soluble	-6.08	0.00038	8.24e-07	Poorly soluble	Low	No	Yes	No	No	No	No	No	-8.24	0	0	1	1	1	0.55	0	1	1	4.71
ZINC000049823083	OCCNCc1nnc2c3cc(-c4ccccc4)c(-c4ccc(CN5CCC(c6n[nH]c(-c7ccccn7)n6)CC5)cc4)nc3ccn12	C37H36N10O	636.75	48	36	0.24	10	9	3	189.06	133.04	3.62	4.25	4.57	2.95	5.04	4.09	-6.36	0.000278	4.36e-07	Poorly soluble	-6.76	0.000112	1.76e-07	Poorly soluble	-12.41	2.45e-10	3.85e-13	Insoluble	Low	No	Yes	Yes	No	Yes	No	No	-7.17	2	3	0	1	2	0.17	0	0	3	5.21
ZINC000049823287	CN(C)C(=O)N1CCN(c2ncc3cc(-c4ccccc4)c(-c4ccc(CN5CCC(c6n[nH]c(-c7ccccn7)n6)CC5)cc4)nc3n2)CC1	C39H41N11O	679.82	51	33	0.31	9	8	1	208.92	123.16	4.96	4.63	4.43	3.42	4.28	4.34	-6.86	9.46e-05	1.39e-07	Poorly soluble	-6.94	7.77e-05	1.14e-07	Poorly soluble	-11.44	2.45e-09	3.61e-12	Insoluble	Low	No	Yes	Yes	Yes	Yes	No	Yes	-7.16	2	3	0	0	2	0.17	0	0	3	5.46
ZINC000049832770	Nc1ccc(-c2nc(C3CCN(Cc4ccc(-c5nc6nc(N7CCN(CCO)CC7)ccc6nc5-c5ccccc5)cc4)CC3)n[nH]2)cn1	C38H41N11O	667.81	50	33	0.32	9	9	3	206.19	149.1	4.89	3.8	3.33	1.95	4.23	3.64	-6.27	0.00036	5.39e-07	Poorly soluble	-6.63	0.000158	2.37e-07	Poorly soluble	-11.28	3.53e-09	5.28e-12	Insoluble	Low	No	Yes	Yes	Yes	Yes	No	No	-7.68	2	3	1	1	2	0.17	0	0	3	5.44
ZINC000049832791	CN(C)CCN1CCN(c2ncc3cc(-c4ccccc4)c(-c4ccc(CN5CCC(c6n[nH]c(-c7ccccn7)n6)CC5)cc4)nc3n2)CC1	C40H45N11	679.86	51	33	0.35	10	9	1	213.14	106.09	5.38	5.2	4.31	3.19	5.14	4.64	-7.15	4.81e-05	7.08e-08	Poorly soluble	-7.18	4.54e-05	6.68e-08	Poorly soluble	-12.3	3.38e-10	4.97e-13	Insoluble	High	No	No	Yes	Yes	Yes	No	Yes	-6.76	2	3	0	0	3	0.17	0	0	3	5.65
ZINC000049832887	CN1CCN(Cc2nnc3c4cc(-c5ccccc5)c(-c5ccc(CN6CCC(c7n[nH]c(-c8ccccn8)n7)CC6)cc5)nc4ccn23)CC1	C40H41N11	675.83	51	36	0.3	8	9	1	211.03	107.26	5.14	5.21	4.47	3.47	4.96	4.65	-7.31	3.33e-05	4.93e-08	Poorly soluble	-7.21	4.17e-05	6.16e-08	Poorly soluble	-12.24	3.87e-10	5.73e-13	Insoluble	High	No	No	Yes	Yes	Yes	No	No	-6.72	2	3	0	0	3	0.17	0	0	3	5.53
ZINC000049832963	CN(C)CC(=O)N1CCN(c2ncc3cc(-c4ccccc4)c(-c4ccc(CN5CCC(c6n[nH]c(-c7ccccn7)n6)CC5)cc4)nc3n2)CC1	C40H43N11O	693.84	52	33	0.33	10	9	1	213.34	123.16	4.98	4.69	3.83	2.78	4.69	4.19	-6.91	8.61e-05	1.24e-07	Poorly soluble	-7	6.87e-05	9.9e-08	Poorly soluble	-11.83	1.03e-09	1.49e-12	Insoluble	High	No	Yes	Yes	Yes	Yes	Yes	Yes	-7.2	2	3	0	0	2	0.17	0	0	3	5.56
ZINC000049832994	c1ccc(-c2cc3cnc(N4CCn5cnnc5C4)nc3nc2-c2ccc(CN3CCC(c4n[nH]c(-c5ccccn5)n4)CC3)cc2)cc1	C37H34N12	646.75	49	38	0.24	7	9	1	193.92	130.32	3.35	4.09	4.46	2.97	4.27	3.83	-6.54	0.000187	2.89e-07	Poorly soluble	-6.53	0.00019	2.94e-07	Poorly soluble	-11.97	6.88e-10	1.06e-12	Insoluble	Low	No	Yes	Yes	No	Yes	No	Yes	-7.34	2	3	0	0	2	0.17	0	0	2	5.26
ZINC000049833228	CN1CC(N2CCN(c3ncc4cc(-c5ccccc5)c(-c5ccc(CN6CCC(c7n[nH]c(-c8ccccn8)n7)CC6)cc5)nc4n3)CC2)C1	C40H43N11	677.84	51	33	0.35	8	9	1	214.94	106.09	5.38	5.04	3.68	3.19	4.76	4.41	-7.17	4.6e-05	6.78e-08	Poorly soluble	-7.01	6.64e-05	9.79e-08	Poorly soluble	-11.71	1.32e-09	1.95e-12	Insoluble	High	No	No	Yes	Yes	Yes	No	Yes	-6.86	2	3	0	0	3	0.17	0	0	3	5.82
ZINC000049833268	C[C@H]1CN(c2ncc3cc(-c4ccccc4)c(-c4ccc(CN5CCC(c6n[nH]c(-c7ccccn7)n6)CC5)cc4)nc3n2)C[C@@H](C)O1	C38H39N9O	637.78	48	33	0.32	7	8	1	194.9	108.84	5.05	5.84	5.62	3.61	5.75	5.17	-7.52	1.93e-05	3.02e-08	Poorly soluble	-7.9	8.08e-06	1.27e-08	Poorly soluble	-12.16	4.4e-10	6.9e-13	Insoluble	Low	No	No	Yes	No	No	No	Yes	-6.04	1	4	0	0	3	0.55	0	0	2	5.73
ZINC000049833456	O=S1(=O)CCN(c2ncc3cc(-c4ccccc4)c(-c4ccc(CN5CCC(c6n[nH]c(-c7ccccn7)n6)CC5)cc4)nc3n2)CC1	C36H35N9O2S	657.79	48	33	0.28	7	9	1	193.17	142.13	4.05	4.5	5.32	3.18	4.8	4.37	-6.8	0.000104	1.58e-07	Poorly soluble	-7.21	4.1e-05	6.23e-08	Poorly soluble	-12	6.52e-10	9.91e-13	Insoluble	Low	No	Yes	Yes	Yes	Yes	No	Yes	-7.12	2	3	1	1	2	0.17	0	0	2	5.12
ZINC000049833531	OCCN1CCN(c2ccc3nc(-c4ccccc4)c(-c4ccc(CN5CCC(c6n[nH]c(-c7ccccn7)n6)CC5)cc4)nc3n2)CC1	C38H40N10O	652.79	49	33	0.32	9	9	2	201.79	123.08	4.04	4.18	3.74	2.44	4.94	3.87	-6.43	0.000245	3.76e-07	Poorly soluble	-6.47	0.000219	3.36e-07	Poorly soluble	-11.66	1.44e-09	2.2e-12	Insoluble	High	No	Yes	Yes	Yes	Yes	No	Yes	-7.31	2	3	0	0	2	0.17	0	0	3	5.37
ZINC000049841134	CN1CCN(c2ncc3cc(-c4ccccc4)c(-c4ccc(CN5CCC(c6n[nH]c(-c7ccc(=O)[nH]c7)n6)CC5)cc4)nc3n2)CC1	C37H38N10O	638.76	48	33	0.3	7	8	2	198.65	122.82	4.08	4.03	3.67	3.42	5.29	4.1	-6.39	0.000263	4.11e-07	Poorly soluble	-6.31	0.000311	4.87e-07	Poorly soluble	-11.74	1.17e-09	1.84e-12	Insoluble	High	No	Yes	Yes	Yes	Yes	No	Yes	-7.34	2	3	0	0	2	0.17	0	0	2	5.26
ZINC000049841382	OCCN1CCN(c2ncc3cc(-c4ccccc4)c(-c4ccc(CN5CCC(c6n[nH]c(-c7ncccn7)n6)CC5)cc4)nc3n2)CC1	C37H39N11O	653.78	49	33	0.32	9	10	2	199.59	135.97	4.29	3.83	3.13	2.32	4.36	3.59	-6.21	0.000402	6.16e-07	Poorly soluble	-6.38	0.000272	4.16e-07	Poorly soluble	-11.28	3.41e-09	5.21e-12	Insoluble	Low	No	Yes	Yes	Yes	Yes	Yes	Yes	-7.57	2	3	0	1	2	0.17	0	0	3	5.22
ZINC000049841418	CC(=O)N1CCN(c2ncc3cc(-c4ccccc4)c(-c4ccc(CN5CCC(c6n[nH]c(-c7ccccn7)n6)CC5)cc4)nc3n2)CC1	C38H38N10O	650.77	49	33	0.29	8	8	1	200.83	119.92	4.7	4.62	4.29	3.19	5.1	4.38	-6.76	0.000114	1.75e-07	Poorly soluble	-6.86	8.91e-05	1.37e-07	Poorly soluble	-11.76	1.13e-09	1.73e-12	Insoluble	High	No	No	Yes	Yes	Yes	Yes	Yes	-6.99	2	3	0	0	2	0.17	0	0	3	5.22
ZINC000049841451	CN(C)C1CCN(c2ncc3cc(-c4ccccc4)c(-c4ccc(CN5CCC(c6n[nH]c(-c7ccccn7)n6)CC5)cc4)nc3n2)CC1	C39H42N10	650.82	49	33	0.33	8	8	1	201.52	102.85	4.51	5.94	5.54	3.78	5.46	5.05	-7.59	1.68e-05	2.58e-08	Poorly soluble	-7.87	8.68e-06	1.33e-08	Poorly soluble	-12.25	3.68e-10	5.65e-13	Insoluble	High	No	No	Yes	Yes	Yes	No	Yes	-6.05	1	3	0	0	3	0.55	0	0	3	5.7
ZINC000049841536	OCCN1CCN(c2ncc3cc(-c4ccccc4)c(-c4ccc(CN5CCC(c6n[nH]c(-c7ccccn7)n6)CC5)cc4)nc3n2)CC1	C38H40N10O	652.79	49	33	0.32	9	9	2	201.79	123.08	3.97	4.48	3.74	2.85	4.94	4	-6.61	0.000159	2.43e-07	Poorly soluble	-6.78	0.000107	1.64e-07	Poorly soluble	-11.66	1.44e-09	2.2e-12	Insoluble	High	No	Yes	Yes	Yes	Yes	No	Yes	-7.1	2	3	0	0	2	0.17	0	0	3	5.35
ZINC000049867765	NC[C@H](Cc1cccc(C(F)(F)F)c1)NC(=O)c1cc(Br)c(-c2ccnc3[nH]ccc23)s1	C22H18BrF3N4OS	523.37	32	20	0.18	8	6	3	121.91	112.04	2.87	4.92	6.52	3.45	6.68	4.89	-6.12	0.000398	7.6e-07	Poorly soluble	-7.01	5.12e-05	9.78e-08	Poorly soluble	-9.25	2.96e-07	5.66e-10	Poorly soluble	Low	No	Yes	Yes	Yes	Yes	Yes	Yes	-6	1	2	0	1	0	0.55	0	0	3	3.8
ZINC000049867767	NC[C@H](Cc1ccc(C(F)(F)F)cc1)NC(=O)c1cc(Br)c(-c2ccnc3[nH]ccc23)s1	C22H18BrF3N4OS	523.37	32	20	0.18	8	6	3	121.91	112.04	2.9	4.92	6.52	3.45	6.68	4.9	-6.12	0.000398	7.6e-07	Poorly soluble	-7.01	5.12e-05	9.78e-08	Poorly soluble	-9.25	2.96e-07	5.66e-10	Poorly soluble	Low	No	Yes	Yes	Yes	Yes	Yes	Yes	-6	1	2	0	1	0	0.55	0	0	3	3.79
ZINC000049877405	c1ccc(-c2cc3cnc(N4CCOCC4)nc3nc2-c2ccc(CN3CCC(c4n[nH]c(-c5ccccn5)n4)CC3)cc2)cc1	C36H35N9O	609.72	46	33	0.28	7	8	1	185.29	108.84	4.61	4.97	4.84	3.26	5.51	4.64	-6.82	9.22e-05	1.51e-07	Poorly soluble	-6.99	6.18e-05	1.01e-07	Poorly soluble	-11.89	7.93e-10	1.3e-12	Insoluble	High	No	No	Yes	No	Yes	No	Yes	-6.49	1	3	0	0	2	0.55	0	0	2	5.02
ZINC000049888771	OCCN1CCN(c2ccc3nc(-c4ccccc4)c(-c4ccc(CN5CCC(c6n[nH]c(-c7ncccn7)n6)CC5)cc4)nc3n2)CC1	C37H39N11O	653.78	49	33	0.32	9	10	2	199.59	135.97	4.35	3.53	3.13	1.92	4.36	3.46	-6.02	0.000622	9.51e-07	Poorly soluble	-6.07	0.000557	8.52e-07	Poorly soluble	-11.28	3.41e-09	5.21e-12	Insoluble	Low	No	Yes	Yes	Yes	Yes	Yes	Yes	-7.78	2	3	0	1	2	0.17	0	0	3	5.27
ZINC000049888938	CS(=O)(=O)N1CCN(c2ncc3cc(-c4ccccc4)c(-c4ccc(CN5CCC(c6n[nH]c(-c7ccccn7)n6)CC5)cc4)nc3n2)CC1	C37H38N10O2S	686.83	50	33	0.3	8	10	1	204.79	145.37	4.52	4.41	4.79	2.6	3.98	4.06	-6.84	0.0001	1.46e-07	Poorly soluble	-7.18	4.54e-05	6.6e-08	Poorly soluble	-11.69	1.42e-09	2.07e-12	Insoluble	Low	No	Yes	Yes	Yes	Yes	No	Yes	-7.36	2	3	1	1	2	0.17	0	0	3	5.35
ZINC000049889220	O=c1ccc(-c2nc(C3CCN(Cc4ccc(-c5nc6nc(N7CCN(CCO)CC7)ncc6cc5-c5ccccc5)cc4)CC3)n[nH]2)c[nH]1	C38H40N10O2	668.79	50	33	0.32	9	9	3	204.62	143.05	4.02	3.35	3.03	2.43	5.09	3.59	-5.99	0.000682	1.02e-06	Moderately soluble	-6.03	0.000622	9.3e-07	Poorly soluble	-11.54	1.92e-09	2.88e-12	Insoluble	Low	No	Yes	Yes	Yes	Yes	No	Yes	-8	2	3	1	1	2	0.17	0	0	2	5.42
ZINC000049889351	CN(C)CCN1CCN(c2ncc3cc(-c4ccccc4)c(-c4ccc(CN5CCC(c6n[nH]c(-c7ccc(N)nc7)n6)CC5)cc4)nc3n2)CC1	C40H46N12	694.87	52	33	0.35	10	9	2	217.54	132.11	4.79	4.81	3.9	3.11	4.43	4.21	-6.99	7.14e-05	1.03e-07	Poorly soluble	-7.32	3.35e-05	4.82e-08	Poorly soluble	-11.92	8.3e-10	1.19e-12	Insoluble	Low	No	No	Yes	Yes	Yes	No	Yes	-7.12	2	3	0	1	2	0.17	0	0	3	5.75
ZINC000049889524	CN(C)CCN1CCN(c2ccc3nc(-c4ccccc4)c(-c4ccc(CN5CCC(c6n[nH]c(-c7ccccn7)n6)CC5)cc4)nc3n2)CC1	C40H45N11	679.86	51	33	0.35	10	9	1	213.14	106.09	4.87	4.9	4.31	2.78	5.14	4.4	-6.96	7.44e-05	1.09e-07	Poorly soluble	-6.86	9.3e-05	1.37e-07	Poorly soluble	-12.3	3.38e-10	4.97e-13	Insoluble	High	No	No	Yes	Yes	Yes	No	Yes	-6.97	2	3	0	0	2	0.17	0	0	3	5.67
ZINC000049889525	Nc1nnc2c3cc(-c4ccccc4)c(-c4ccc(CN5CCC(c6n[nH]c(-c7ccccn7)n6)CC5)cc4)nc3ccn12	C34H30N10	578.67	44	36	0.18	6	7	2	174.92	126.8	3.85	5.18	5.23	3.85	4.37	4.49	-6.9	7.27e-05	1.26e-07	Poorly soluble	-7.59	1.49e-05	2.57e-08	Poorly soluble	-11.44	2.09e-09	3.61e-12	Insoluble	Low	No	No	Yes	No	Yes	No	No	-6.15	1	3	0	0	2	0.55	0	0	2	4.75
ZINC000049889530	O[C@@H]1CN(c2ncc3cc(-c4ccccc4)c(-c4ccc(CN5CCC(c6n[nH]c(-c7ccccn7)n6)CC5)cc4)nc3n2)CCN1	C36H36N10O	624.74	47	33	0.28	7	9	3	192.08	131.87	4.53	4.17	3.35	2.9	4.29	3.85	-6.4	0.00025	4e-07	Poorly soluble	-6.65	0.000141	2.25e-07	Poorly soluble	-11.37	2.66e-09	4.26e-12	Insoluble	High	No	Yes	Yes	Yes	Yes	No	Yes	-7.15	2	3	0	1	2	0.17	0	0	2	5.39
ZINC000049898192	CN(C)CCN1CCN(c2ccc3nc(-c4ccccc4)c(-c4ccc(CN5CCC(c6n[nH]c(-c7ncccn7)n6)CC5)cc4)nc3n2)CC1	C39H44N12	680.85	51	33	0.36	10	10	1	210.93	118.98	5.06	4.25	3.7	2.26	4.56	3.97	-6.56	0.000189	2.77e-07	Poorly soluble	-6.46	0.000236	3.47e-07	Poorly soluble	-11.93	8e-10	1.17e-12	Insoluble	High	No	Yes	Yes	Yes	Yes	No	Yes	-7.44	2	3	0	0	2	0.17	0	0	3	5.57
ZINC000049898634	CN(C)CCN1CCN(c2ncc3cc(-c4ccccc4)c(-c4ccc(CN5CCC(c6n[nH]c(-c7ncccn7)n6)CC5)cc4)nc3n2)CC1	C39H44N12	680.85	51	33	0.36	10	10	1	210.93	118.98	4.91	4.55	3.7	2.67	4.56	4.08	-6.75	0.000122	1.79e-07	Poorly soluble	-6.77	0.000115	1.69e-07	Poorly soluble	-11.93	8e-10	1.17e-12	Insoluble	High	No	Yes	Yes	Yes	Yes	No	Yes	-7.22	2	3	0	0	2	0.17	0	0	3	5.52
ZINC000049898780	CN(C)CCN1CCN(c2ncc3cc(-c4ccccc4)c(-c4ccc(CN5CCC(c6n[nH]c(-c7ccc(=O)[nH]c7)n6)CC5)cc4)nc3n2)CC1	C40H45N11O	695.86	52	33	0.35	10	9	2	215.96	126.06	4.79	4.07	3.6	3.18	5.29	4.19	-6.53	0.000206	2.96e-07	Poorly soluble	-6.42	0.000263	3.79e-07	Poorly soluble	-12.19	4.52e-10	6.5e-13	Insoluble	High	No	Yes	Yes	Yes	Yes	No	Yes	-7.66	2	3	0	0	2	0.17	0	0	3	5.73
ZINC000049898847	Nc1ccc(-c2nc(C3CCN(Cc4ccc(-c5nc6nc(N7CCN(CCO)CC7)ncc6cc5-c5ccccc5)cc4)CC3)n[nH]2)cn1	C38H41N11O	667.81	50	33	0.32	9	9	3	206.19	149.1	4.08	4.09	3.33	2.09	4.23	3.56	-6.45	0.000236	3.54e-07	Poorly soluble	-6.93	7.91e-05	1.18e-07	Poorly soluble	-11.28	3.53e-09	5.28e-12	Insoluble	Low	No	Yes	Yes	Yes	Yes	No	Yes	-7.47	2	3	1	1	2	0.17	0	0	3	5.45
ZINC000053226515	N#Cc1c[nH]c2ncnc(N3CC[C@](N)(CNC(=O)c4ccc(Cl)cc4)C3)c12	C19H18ClN7O	395.85	28	15	0.26	5	5	3	108.33	123.72	2.47	1.51	1.44	0.9	2.25	1.71	-3.31	0.193	0.000488	Soluble	-3.72	0.0761	0.000192	Soluble	-6.16	0.000271	6.85e-07	Poorly soluble	High	No	Yes	Yes	No	No	Yes	Yes	-7.64	0	0	0	0	0	0.55	0	0	1	3.12
ZINC000053226552	CCc1c[nH]c2ncnc(N3CC[C@](N)(CNC(=O)c4ccc(Cl)cc4)C3)c12	C20H23ClN6O	398.89	28	15	0.35	6	4	3	113.38	99.93	2.43	2.59	2.13	1.98	3.11	2.45	-3.95	0.0452	0.000113	Soluble	-4.34	0.0183	4.6e-05	Moderately soluble	-6.87	5.42e-05	1.36e-07	Poorly soluble	High	No	Yes	Yes	Yes	No	Yes	Yes	-6.89	0	0	0	0	0	0.55	0	0	1	3.26
ZINC000053229226	N[C@]1(CNC(=O)c2ccc(F)cc2F)CCN(c2ncnc3[nH]cc(Cl)c23)C1	C18H17ClF2N6O	406.82	28	15	0.28	5	6	3	103.53	99.93	2.61	2	2.69	2.29	3.06	2.53	-3.69	0.0833	0.000205	Soluble	-3.73	0.0766	0.000188	Soluble	-6.63	9.6e-05	2.36e-07	Poorly soluble	High	No	Yes	Yes	No	No	Yes	Yes	-7.36	0	0	0	0	0	0.55	0	0	1	3.12
ZINC000053230324	Cc1c[nH]c2ncnc(N3CC[C@](N)(CNC(=O)Oc4ccccc4)C3)c12	C19H22N6O2	366.42	27	15	0.32	6	5	3	105.26	109.16	2.41	1.83	1.58	1.55	1.62	1.8	-3.28	0.192	0.000525	Soluble	-3.74	0.0663	0.000181	Soluble	-5.61	0.000893	2.44e-06	Moderately soluble	High	No	Yes	Yes	No	No	Yes	Yes	-7.24	0	0	0	0	0	0.55	0	0	1	3.35
ZINC000053230326	Cc1c[nH]c2ncnc(N3CC[C@@](N)(CNC(=O)Oc4ccccc4)C3)c12	C19H22N6O2	366.42	27	15	0.32	6	5	3	105.26	109.16	2.27	1.83	1.58	1.55	1.62	1.77	-3.28	0.192	0.000525	Soluble	-3.74	0.0663	0.000181	Soluble	-5.61	0.000893	2.44e-06	Moderately soluble	High	No	Yes	Yes	No	No	Yes	Yes	-7.24	0	0	0	0	0	0.55	0	0	1	3.35
ZINC000053230328	Cc1c[nH]c2ncnc(N3CC[C@@](N)(CNC(=O)c4ccccc4)C3)c12	C19H22N6O	350.42	26	15	0.32	5	4	3	103.57	99.93	2.32	1.53	1.22	1.53	2.09	1.74	-3.07	0.296	0.000844	Soluble	-3.24	0.203	0.000579	Soluble	-5.88	0.000459	1.31e-06	Moderately soluble	High	No	Yes	Yes	No	No	Yes	Yes	-7.35	0	0	0	0	0	0.55	0	0	1	3.03
ZINC000053243148	Cc1c[nH]c2ncnc(N3CC[C@@H](NC(=O)Nc4ccccc4)C3)c12	C18H20N6O	336.39	25	15	0.28	5	3	3	100.52	85.94	2.38	2.38	2.1	2.11	1.67	2.13	-3.54	0.0972	0.000289	Soluble	-3.83	0.0503	0.000149	Soluble	-5.68	0.000704	2.09e-06	Moderately soluble	High	No	Yes	Yes	No	No	Yes	Yes	-6.66	0	0	0	0	0	0.55	0	0	0	3.19
ZINC000053243150	Cc1c[nH]c2ncnc(N3CC[C@](N)(CNC=O)C3)c12	C13H18N6O	274.32	20	9	0.46	4	4	3	79.25	99.93	1.39	-0.11	-0.46	0.42	0.82	0.41	-1.54	7.9	0.0288	Very soluble	-1.54	7.99	0.0291	Very soluble	-3.41	0.108	0.000393	Soluble	High	No	Yes	No	No	No	No	No	-8.05	0	1	0	0	0	0.55	0	1	0	2.77
ZINC000053243152	Cc1c[nH]c2ncnc(N3CC[C@@](N)(CNC=O)C3)c12	C13H18N6O	274.32	20	9	0.46	4	4	3	79.25	99.93	1.46	-0.11	-0.46	0.42	0.82	0.43	-1.54	7.9	0.0288	Very soluble	-1.54	7.99	0.0291	Very soluble	-3.41	0.108	0.000393	Soluble	High	No	Yes	No	No	No	No	No	-8.05	0	1	0	0	0	0.55	0	1	0	2.77
ZINC000053243341	N[C@]1(CNC(=O)c2ccc(F)cc2)CCN(c2ncnc3[nH]cc(Cl)c23)C1	C18H18ClFN6O	388.83	27	15	0.28	5	5	3	103.57	99.93	2.37	1.9	2.13	1.91	2.64	2.19	-3.53	0.115	0.000296	Soluble	-3.62	0.093	0.000239	Soluble	-6.36	0.000169	4.34e-07	Poorly soluble	High	No	Yes	Yes	No	No	Yes	Yes	-7.32	0	0	0	0	0	0.55	0	0	1	3.02
ZINC000053243533	CC(=O)N[C@@H]1CCN(c2ncnc3[nH]cc(C)c23)C1	C13H17N5O	259.31	19	9	0.46	3	3	2	76.11	73.91	2.03	1	0.6	0.81	1.41	1.17	-2.23	1.53	0.00589	Soluble	-2.14	1.87	0.00723	Soluble	-3.53	0.0762	0.000294	Soluble	High	No	Yes	Yes	No	No	No	No	-7.17	0	0	0	0	0	0.55	0	0	0	2.7
ZINC000053243714	N#Cc1c[nH]c2ncnc(N3CC[C@](N)(CNC(=O)c4ccc(F)cc4)C3)c12	C19H18FN7O	379.39	28	15	0.26	5	6	3	103.27	123.72	2.27	0.99	1.35	0.78	2.03	1.48	-2.88	0.497	0.00131	Soluble	-3.18	0.253	0.000666	Soluble	-5.84	0.000547	1.44e-06	Moderately soluble	High	No	Yes	Yes	No	No	No	Yes	-7.91	0	0	0	0	0	0.55	0	0	1	3.14
ZINC000053243996	N[C@@H]1CCN(c2ncnc3[nH]cc(Cl)c23)C1	C10H12ClN5	237.69	16	9	0.4	1	3	2	66.25	70.83	1.76	1	0.77	1.02	1.29	1.17	-2.29	1.21	0.00508	Soluble	-2.08	1.99	0.00839	Soluble	-3.02	0.228	0.000959	Soluble	High	No	Yes	Yes	No	No	No	No	-7.04	0	0	0	0	0	0.55	0	0	1	2.52
ZINC000053243998	N[C@H]1CCCN(c2ncnc3[nH]cc(Cl)c23)C1	C11H14ClN5	251.72	17	9	0.45	1	3	2	71.06	70.83	1.78	1.36	1.16	1.3	1.51	1.42	-2.58	0.657	0.00261	Soluble	-2.45	0.893	0.00355	Soluble	-3.29	0.128	0.000507	Soluble	High	No	Yes	Yes	No	No	No	No	-6.87	0	0	0	0	0	0.55	0	0	0	2.58
ZINC000053243999	N[C@@H]1CCCN(c2ncnc3[nH]cc(Cl)c23)C1	C11H14ClN5	251.72	17	9	0.45	1	3	2	71.06	70.83	1.8	1.36	1.16	1.3	1.51	1.43	-2.58	0.657	0.00261	Soluble	-2.45	0.893	0.00355	Soluble	-3.29	0.128	0.000507	Soluble	High	No	Yes	Yes	No	No	No	No	-6.87	0	0	0	0	0	0.55	0	0	0	2.58
ZINC000053244018	Cc1c[nH]c2ncnc(N3CC[C@@H](NC(=O)c4ccccc4)C3)c12	C18H19N5O	321.38	24	15	0.28	4	3	2	96.01	73.91	2.5	2.65	1.89	2.1	2.46	2.32	-3.7	0.064	0.000199	Soluble	-3.85	0.0451	0.00014	Soluble	-5.64	0.000743	2.31e-06	Moderately soluble	High	Yes	Yes	Yes	No	Yes	Yes	Yes	-6.38	0	0	0	0	0	0.55	0	0	0	2.86
ZINC000053276459	CCc1c[nH]c2ncnc(N3CC[C@](N)(CNC(=O)c4ccc(F)cc4)C3)c12	C20H23FN6O	382.43	28	15	0.35	6	5	3	108.33	99.93	2.5	2.06	2.04	1.87	2.89	2.27	-3.51	0.118	0.00031	Soluble	-3.79	0.0624	0.000163	Soluble	-6.54	0.000109	2.86e-07	Poorly soluble	High	No	Yes	Yes	No	No	Yes	Yes	-7.17	0	0	0	0	0	0.55	0	0	1	3.28
ZINC000053276543	Cc1c[nH]c2ncnc(N3CC[C@](N)(CNC(=O)c4ccc(Cl)cc4)C3)c12	C19H21ClN6O	384.86	27	15	0.32	5	4	3	108.58	99.93	2.57	2.16	1.88	1.76	2.73	2.22	-3.67	0.0827	0.000215	Soluble	-3.89	0.0494	0.000128	Soluble	-6.47	0.000129	3.36e-07	Poorly soluble	High	No	Yes	Yes	No	No	Yes	Yes	-7.11	0	0	0	0	0	0.55	0	0	1	3.07
ZINC000053293816	CCN[C@@H]1CCN(c2ncnc3[nH]cc(C)c23)C1	C13H19N5	245.32	18	9	0.54	3	3	2	75.91	56.84	2.36	1.62	1.07	1.3	1.88	1.65	-2.55	0.686	0.0028	Soluble	-2.43	0.92	0.00375	Soluble	-3.99	0.025	0.000102	Soluble	High	Yes	Yes	Yes	No	No	No	No	-6.65	0	0	0	0	0	0.55	0	0	1	2.78
ZINC000053295180	N[C@]1(CNC(=O)c2ccc(Cl)cc2)CCN(c2ncnc3[nH]cc(Cl)c23)C1	C18H18Cl2N6O	405.28	27	15	0.28	5	4	3	108.62	99.93	2.61	2.42	2.22	2.03	2.85	2.43	-3.96	0.0446	0.00011	Soluble	-4.16	0.028	6.9e-05	Moderately soluble	-6.68	8.37e-05	2.07e-07	Poorly soluble	High	No	Yes	Yes	No	No	Yes	Yes	-7.05	0	0	0	0	0	0.55	0	0	1	2.99
ZINC000053295386	N#Cc1c[nH]c2ncnc(N3CC[C@](N)(CNC(=O)c4ccc(F)cc4F)C3)c12	C19H17F2N7O	397.38	29	15	0.26	5	7	3	103.23	123.72	2	1.09	1.9	1.16	2.45	1.72	-3.04	0.36	0.000905	Soluble	-3.28	0.208	0.000524	Soluble	-6.11	0.000312	7.85e-07	Poorly soluble	High	No	Yes	No	No	No	No	Yes	-7.95	0	0	0	0	0	0.55	0	0	1	3.23
ZINC000053296498	Cc1c[nH]c2ncnc(N3CC[C@H](N)C3)c12	C11H15N5	217.27	16	9	0.45	1	3	2	66.2	70.83	1.6	0.74	0.42	0.75	1.13	0.93	-2	2.16	0.00992	Soluble	-1.81	3.39	0.0156	Very soluble	-2.79	0.353	0.00163	Soluble	High	No	Yes	No	No	No	No	No	-7.1	0	0	0	0	0	0.55	0	0	1	2.53
ZINC000053296500	Cc1c[nH]c2ncnc(N3CC[C@@H](N)C3)c12	C11H15N5	217.27	16	9	0.45	1	3	2	66.2	70.83	1.72	0.74	0.42	0.75	1.13	0.95	-2	2.16	0.00992	Soluble	-1.81	3.39	0.0156	Very soluble	-2.79	0.353	0.00163	Soluble	High	No	Yes	No	No	No	No	No	-7.1	0	0	0	0	0	0.55	0	0	1	2.53
ZINC000053296916	Cc1c[nH]c2ncnc(N3CC[C@](N)(CNC(=O)Cl)C3)c12	C13H17ClN6O	308.77	21	9	0.46	4	4	3	84.04	99.93	1.94	0.93	0.74	0.68	1.18	1.09	-2.39	1.25	0.00404	Soluble	-2.61	0.75	0.00243	Soluble	-4.01	0.0304	9.84e-05	Moderately soluble	High	No	Yes	No	No	No	No	No	-7.52	0	0	0	0	0	0.55	0	2	0	2.89
ZINC000053296919	Cc1c[nH]c2ncnc(N3CC[C@@](N)(CNC(=O)Cl)C3)c12	C13H17ClN6O	308.77	21	9	0.46	4	4	3	84.04	99.93	1.82	0.93	0.74	0.68	1.18	1.07	-2.39	1.25	0.00404	Soluble	-2.61	0.75	0.00243	Soluble	-4.01	0.0304	9.84e-05	Moderately soluble	High	No	Yes	No	No	No	No	No	-7.52	0	0	0	0	0	0.55	0	2	0	2.89
ZINC000053296942	Cc1c[nH]c2ncnc(N3CC[C@](N)(CNC(=O)c4ccccc4F)C3)c12	C19H21FN6O	368.41	27	15	0.32	5	5	3	103.52	99.93	2.57	1.63	1.78	1.64	2.51	2.03	-3.23	0.216	0.000586	Soluble	-3.34	0.168	0.000456	Soluble	-6.15	0.000261	7.08e-07	Poorly soluble	High	No	Yes	Yes	No	No	Yes	Yes	-7.39	0	0	0	0	0	0.55	0	0	1	3.14
ZINC000053296946	Cc1c[nH]c2ncnc(N3CC[C@@](N)(CNC(=O)c4ccccc4F)C3)c12	C19H21FN6O	368.41	27	15	0.32	5	5	3	103.52	99.93	2.55	1.63	1.78	1.64	2.51	2.02	-3.23	0.216	0.000586	Soluble	-3.34	0.168	0.000456	Soluble	-6.15	0.000261	7.08e-07	Poorly soluble	High	No	Yes	Yes	No	No	Yes	Yes	-7.39	0	0	0	0	0	0.55	0	0	1	3.14
ZINC000053297574	Clc1c[nH]c2ncnc(N3CCC4(CCNCC4)C3)c12	C14H18ClN5	291.78	20	9	0.57	1	3	2	87.11	56.84	2.34	2.05	1.43	2.09	2.58	2.1	-3.21	0.181	0.00062	Soluble	-2.87	0.392	0.00134	Soluble	-4.74	0.00529	1.81e-05	Moderately soluble	High	Yes	Yes	Yes	No	No	Yes	No	-6.62	0	0	0	0	0	0.55	0	0	0	2.75
ZINC000053298442	CC(=O)NC[C@@]1(N)CCN(c2ncnc3[nH]cc(C)c23)C1	C14H20N6O	288.35	21	9	0.5	4	4	3	83.66	99.93	1.88	-0.13	-0.07	0.28	1.03	0.6	-1.6	7.26	0.0252	Very soluble	-1.51	8.81	0.0306	Very soluble	-3.79	0.047	0.000163	Soluble	High	No	Yes	No	No	No	No	No	-8.15	0	0	0	0	0	0.55	0	0	0	2.86
ZINC000053298444	CC(=O)NC[C@]1(N)CCN(c2ncnc3[nH]cc(C)c23)C1	C14H20N6O	288.35	21	9	0.5	4	4	3	83.66	99.93	1.92	-0.13	-0.07	0.28	1.03	0.61	-1.6	7.26	0.0252	Very soluble	-1.51	8.81	0.0306	Very soluble	-3.79	0.047	0.000163	Soluble	High	No	Yes	No	No	No	No	No	-8.15	0	0	0	0	0	0.55	0	0	0	2.86
ZINC000053312524	Cc1c[nH]c2ncnc(N3CC[C@@H](NS(C)(=O)=O)C3)c12	C12H17N5O2S	295.36	20	9	0.5	3	5	2	80.07	99.36	1.49	0.78	1.09	0.07	0.34	0.75	-2.3	1.49	0.00504	Soluble	-2.45	1.05	0.00357	Soluble	-3.5	0.0943	0.000319	Soluble	High	No	Yes	No	No	No	No	No	-7.55	0	0	0	0	0	0.55	0	0	0	3.07
ZINC000053312878	Cc1c[nH]c2ncnc(N3CC[C@@H](NS(=O)(=O)c4ccccc4)C3)c12	C17H19N5O2S	357.43	25	15	0.29	4	5	2	98.91	99.36	2.1	2.34	2.52	1.39	1.36	1.94	-3.71	0.0697	0.000195	Soluble	-4.07	0.0307	8.59e-05	Moderately soluble	-5.59	0.000919	2.57e-06	Moderately soluble	High	No	Yes	Yes	No	No	Yes	Yes	-6.82	0	0	0	0	0	0.55	0	0	1	3.37
ZINC000053313140	Cc1c[nH]c2ncnc(N3CC[C@@H](NCc4ccccc4)C3)c12	C18H21N5	307.39	23	15	0.33	4	3	2	95.59	56.84	2.68	2.75	2.1	2.31	2.93	2.55	-3.7	0.0618	0.000201	Soluble	-3.6	0.0775	0.000252	Soluble	-6.1	0.000244	7.94e-07	Poorly soluble	High	Yes	Yes	Yes	Yes	No	Yes	Yes	-6.22	0	0	0	0	0	0.55	0	0	0	2.93
ZINC000053313660	Cc1c[nH]c2ncnc(N3CC[C@](N)(CNC(=O)c4cccc(F)c4)C3)c12	C19H21FN6O	368.41	27	15	0.32	5	5	3	103.52	99.93	2.33	1.63	1.78	1.64	2.51	1.98	-3.23	0.216	0.000586	Soluble	-3.34	0.168	0.000456	Soluble	-6.15	0.000261	7.08e-07	Poorly soluble	High	No	Yes	Yes	No	No	Yes	Yes	-7.39	0	0	0	0	0	0.55	0	0	1	3.1
ZINC000053313662	Cc1c[nH]c2ncnc(N3CC[C@@](N)(CNC(=O)c4cccc(F)c4)C3)c12	C19H21FN6O	368.41	27	15	0.32	5	5	3	103.52	99.93	2.4	1.63	1.78	1.64	2.51	1.99	-3.23	0.216	0.000586	Soluble	-3.34	0.168	0.000456	Soluble	-6.15	0.000261	7.08e-07	Poorly soluble	High	No	Yes	Yes	No	No	Yes	Yes	-7.39	0	0	0	0	0	0.55	0	0	1	3.1
ZINC000053313666	Cc1c[nH]c2ncnc(N3CC[C@](N)(CNC(=O)c4ccc(F)cc4)C3)c12	C19H21FN6O	368.41	27	15	0.32	5	5	3	103.52	99.93	2.58	1.63	1.78	1.64	2.51	2.03	-3.23	0.216	0.000586	Soluble	-3.34	0.168	0.000456	Soluble	-6.15	0.000261	7.08e-07	Poorly soluble	High	No	Yes	Yes	No	No	Yes	Yes	-7.39	0	0	0	0	0	0.55	0	0	1	3.09
ZINC000053313668	Cc1c[nH]c2ncnc(N3CC[C@@](N)(CNC(=O)c4ccc(F)cc4)C3)c12	C19H21FN6O	368.41	27	15	0.32	5	5	3	103.52	99.93	2.58	1.63	1.78	1.64	2.51	2.03	-3.23	0.216	0.000586	Soluble	-3.34	0.168	0.000456	Soluble	-6.15	0.000261	7.08e-07	Poorly soluble	High	No	Yes	Yes	No	No	Yes	Yes	-7.39	0	0	0	0	0	0.55	0	0	1	3.09
ZINC000053314244	Cc1c[nH]c2ncnc(N3CC[C@](N)(CNC(=O)C(F)(F)F)C3)c12	C14H17F3N6O	342.32	24	9	0.5	5	7	3	83.86	99.93	1.91	0.99	1.73	0.66	1.61	1.38	-2.53	1	0.00293	Soluble	-2.68	0.72	0.0021	Soluble	-4.26	0.0189	5.51e-05	Moderately soluble	High	No	Yes	No	No	No	No	No	-7.69	0	0	0	0	0	0.55	0	0	0	2.94
ZINC000053314247	Cc1c[nH]c2ncnc(N3CC[C@@](N)(CNC(=O)C(F)(F)F)C3)c12	C14H17F3N6O	342.32	24	9	0.5	5	7	3	83.86	99.93	1.28	0.99	1.73	0.66	1.61	1.25	-2.53	1	0.00293	Soluble	-2.68	0.72	0.0021	Soluble	-4.26	0.0189	5.51e-05	Moderately soluble	High	No	Yes	No	No	No	No	No	-7.69	0	0	0	0	0	0.55	0	0	0	2.94
ZINC000055723224	O=c1ccc(-c2nnc(C3CCN(Cc4ccc(-c5nc6cc[nH]c(=O)c6cc5-c5ccccc5)cc4)CC3)[nH]2)c[nH]1	C33H29N7O2	555.63	42	33	0.18	6	6	3	167.42	123.42	3.39	2.75	4.58	3.49	6.54	4.15	-5.2	0.00348	6.27e-06	Moderately soluble	-5	0.0056	1.01e-05	Moderately soluble	-11.96	6.13e-10	1.1e-12	Insoluble	Low	No	Yes	Yes	Yes	Yes	No	No	-7.74	1	3	0	0	0	0.55	0	0	1	4.61
ZINC000056861391	Cc1c[nH]c2ncnc(N3CC[C@](N)(CNC(=O)c4ccccc4)C3)c12	C19H22N6O	350.42	26	15	0.32	5	4	3	103.57	99.93	2.21	1.53	1.22	1.53	2.09	1.72	-3.07	0.296	0.000844	Soluble	-3.24	0.203	0.000579	Soluble	-5.88	0.000459	1.31e-06	Moderately soluble	High	No	Yes	Yes	No	No	Yes	Yes	-7.35	0	0	0	0	0	0.55	0	0	1	3.03
ZINC000058649914	NC[C@H](Cc1ccc(Cl)cc1)C(=O)N1CCN(c2ncnc3[nH]ccc23)CC1	C20H23ClN6O	398.89	28	15	0.35	6	4	2	116.97	91.14	2.34	2	1.32	1.98	2.6	2.05	-3.57	0.106	0.000267	Soluble	-3.54	0.115	0.000288	Soluble	-5.82	0.000598	1.5e-06	Moderately soluble	High	No	Yes	No	No	No	Yes	Yes	-7.31	0	0	0	0	0	0.55	0	0	1	3.15
ZINC000058655518	C[C@@H]1SCc2ncnc(N3CCN(C(=O)[C@H](N)Cc4c[nH]c5ccccc45)CC3)c21	C22H26N6OS	422.55	30	15	0.41	5	4	2	127.37	116.44	2.91	1.59	1.25	1.26	2.72	1.94	-3.5	0.133	0.000315	Soluble	-3.65	0.0954	0.000226	Soluble	-5.6	0.00106	2.51e-06	Moderately soluble	High	No	Yes	No	Yes	No	Yes	Yes	-7.75	0	0	0	0	0	0.55	0	0	1	4.26
ZINC000064526578	COc1ccc(C[C@@H](N)C(=O)N2CCN(c3ncnc4ccccc34)CC2)cc1	C22H25N5O2	391.47	29	16	0.32	6	5	1	119.3	84.58	3.51	2.32	1.1	1.76	2.12	2.16	-3.74	0.0711	0.000182	Soluble	-3.73	0.0721	0.000184	Soluble	-5.73	0.000734	1.87e-06	Moderately soluble	High	No	Yes	Yes	No	Yes	Yes	Yes	-7.04	0	0	0	0	0	0.55	0	0	1	3.12
ZINC000064526590	O=S(=O)(Nc1nc(NCCc2ccccc2)nc2c1CN(Cc1ccccc1)CC2)c1ccc2ccccc2c1	C32H31N5O2S	549.69	40	28	0.19	9	5	2	163.98	95.6	3.29	5.98	5.66	3.82	4.73	4.7	-6.94	6.32e-05	1.15e-07	Poorly soluble	-7.76	9.46e-06	1.72e-08	Poorly soluble	-12.05	4.89e-10	8.89e-13	Insoluble	High	No	No	Yes	Yes	Yes	Yes	Yes	-5.41	1	4	0	0	1	0.55	0	0	3	4.21
ZINC000064527394	Cc1cccc2ncnc(N3CCN(C(=O)[C@H](N)Cc4ccc(Cl)cc4)CC3)c12	C22H24ClN5O	409.91	29	16	0.32	5	4	1	122.78	75.35	3.49	3.34	2.05	2.77	3.22	2.97	-4.56	0.0112	2.73e-05	Moderately soluble	-4.6	0.0103	2.51e-05	Moderately soluble	-6.59	0.000106	2.59e-07	Poorly soluble	High	Yes	Yes	No	Yes	Yes	Yes	Yes	-6.43	0	0	0	0	0	0.55	0	0	1	3.2
ZINC000064527395	Cc1ccc2ncnc(N3CCN(C(=O)[C@H](N)Cc4ccc(Cl)cc4)CC3)c2c1	C22H24ClN5O	409.91	29	16	0.32	5	4	1	122.78	75.35	3.5	3.34	2.05	2.77	3.22	2.98	-4.56	0.0112	2.73e-05	Moderately soluble	-4.6	0.0103	2.51e-05	Moderately soluble	-6.59	0.000106	2.59e-07	Poorly soluble	High	Yes	Yes	No	Yes	Yes	Yes	Yes	-6.43	0	0	0	0	0	0.55	0	0	1	3.17
ZINC000064527396	NC[C@@H](C(=O)N1CCN(c2ncnc3[nH]cc(Cl)c23)CC1)c1ccc(Cl)c(Cl)c1	C19H19Cl3N6O	453.75	29	15	0.32	5	4	2	122.19	91.14	2.86	2.96	2.55	2.74	3.5	2.92	-4.57	0.0122	2.69e-05	Moderately soluble	-4.54	0.0132	2.91e-05	Moderately soluble	-6.6	0.000114	2.51e-07	Poorly soluble	High	No	Yes	Yes	Yes	Yes	Yes	Yes	-6.97	0	0	0	0	0	0.55	0	0	1	3.22
ZINC000064528159	N[C@H](Cc1cc(F)cc(F)c1)C(=O)N1CCN(c2ncnc3ccccc23)CC1	C21H21F2N5O	397.42	29	16	0.29	5	6	1	112.72	75.35	3.29	2.55	2.21	2.56	2.9	2.7	-3.99	0.0408	0.000103	Soluble	-3.78	0.066	0.000166	Soluble	-6.15	0.000279	7.03e-07	Poorly soluble	High	Yes	Yes	No	No	Yes	Yes	Yes	-6.91	0	0	0	0	0	0.55	0	0	1	3.16
ZINC000064528160	COc1cc(C[C@@H](N)C(=O)N2CCN(c3ncnc4ccccc34)CC2)cc(OC)c1	C23H27N5O3	421.49	31	16	0.35	7	6	1	125.79	93.81	3.37	2.29	1.1	1.45	2.18	2.08	-3.82	0.0644	0.000153	Soluble	-3.9	0.0534	0.000127	Soluble	-5.83	0.000626	1.49e-06	Moderately soluble	High	No	Yes	No	No	Yes	Yes	Yes	-7.25	0	0	0	0	0	0.55	0	0	1	3.42
ZINC000064528171	CC(C)c1ccc(C[C@@H](CN)C(=O)N2CCN(c3ncnc4[nH]ccc34)CC2)cc1	C23H30N6O	406.52	30	15	0.43	7	4	2	126.54	91.14	3.14	2.5	1.79	2.15	3.1	2.53	-3.84	0.0583	0.000143	Soluble	-4.06	0.0355	8.72e-05	Moderately soluble	-6.02	0.000385	9.46e-07	Poorly soluble	High	No	Yes	No	No	No	Yes	Yes	-7	0	0	0	0	0	0.55	0	0	1	3.45
ZINC000064528368	Cc1c[nH]c2ncnc(N3CCN(C(=O)[C@H](N)Cc4ccc(F)cc4)CC3)c12	C20H23FN6O	382.43	28	15	0.35	5	5	2	112.08	91.14	2.72	1.94	1.28	1.87	2.52	2.07	-3.5	0.121	0.000316	Soluble	-3.48	0.127	0.000332	Soluble	-5.48	0.00125	3.28e-06	Moderately soluble	High	No	Yes	No	No	No	Yes	Yes	-7.26	0	0	0	0	0	0.55	0	0	1	3.21
ZINC000064528379	N[C@H](Cc1ccccc1Cl)C(=O)N1CCN(c2ncnc3ccccc23)CC1	C21H22ClN5O	395.89	28	16	0.29	5	4	1	117.82	75.35	3.23	2.98	1.74	2.56	2.7	2.64	-4.26	0.0215	5.44e-05	Moderately soluble	-4.23	0.0235	5.94e-05	Moderately soluble	-6.21	0.000244	6.15e-07	Poorly soluble	High	No	Yes	No	No	Yes	Yes	Yes	-6.6	0	0	0	0	0	0.55	0	0	1	3.14
ZINC000064538995	Cc1c[nH]c2ncnc(N3CCN(C(=O)[C@H](CN)Cc4ccc(Cl)cc4)CC3)c12	C21H25ClN6O	412.92	29	15	0.38	6	4	2	121.94	91.14	2.81	2.37	1.62	2.2	3.12	2.43	-3.88	0.0544	0.000132	Soluble	-3.92	0.0491	0.000119	Soluble	-6.2	0.000261	6.32e-07	Poorly soluble	High	No	Yes	No	No	Yes	Yes	Yes	-7.14	0	0	0	0	0	0.55	0	0	1	3.31
ZINC000064539221	NC[C@@H](C(=O)N1CCN(c2ncnc3[nH]ccc23)CC1)c1ccc(Cl)cc1	C19H21ClN6O	384.86	27	15	0.32	5	4	2	112.17	91.14	2.48	1.71	1.24	1.76	2.22	1.88	-3.38	0.159	0.000413	Soluble	-3.24	0.222	0.000576	Soluble	-5.43	0.00143	3.71e-06	Moderately soluble	High	No	Yes	Yes	No	No	Yes	Yes	-7.43	0	0	0	0	0	0.55	0	0	1	3.1
ZINC000064539254	Cc1c[nH]c2ncnc(N3CCN(C(=O)[C@H](N)C4Cc5ccccc5C4)CC3)c12	C22H26N6O	390.48	29	15	0.41	4	4	2	119.78	91.14	2.65	2.13	0.9	1.93	2.42	2.01	-3.72	0.0741	0.00019	Soluble	-3.68	0.0824	0.000211	Soluble	-5.39	0.00158	4.06e-06	Moderately soluble	High	No	Yes	No	No	No	Yes	Yes	-7.17	0	0	0	0	0	0.55	0	0	1	3.64
ZINC000064539261	N[C@H](Cc1cccc(Cl)c1)C(=O)N1CCN(c2ncnc3ccccc23)CC1	C21H22ClN5O	395.89	28	16	0.29	5	4	1	117.82	75.35	3.19	2.98	1.74	2.56	2.7	2.63	-4.26	0.0215	5.44e-05	Moderately soluble	-4.23	0.0235	5.94e-05	Moderately soluble	-6.21	0.000244	6.15e-07	Poorly soluble	High	No	Yes	No	No	Yes	Yes	Yes	-6.6	0	0	0	0	0	0.55	0	0	1	3.07
ZINC000064539262	N[C@H](Cc1ccc(Cl)cc1Cl)C(=O)N1CCN(c2ncnc3ccccc23)CC1	C21H21Cl2N5O	430.33	29	16	0.29	5	4	1	122.83	75.35	3.13	3.6	2.39	2.77	3.34	3.05	-4.85	0.00602	1.4e-05	Moderately soluble	-4.87	0.00581	1.35e-05	Moderately soluble	-6.8	6.88e-05	1.6e-07	Poorly soluble	High	Yes	No	No	Yes	Yes	Yes	Yes	-6.37	0	0	0	0	0	0.55	0	0	2	3.22
ZINC000064539263	N[C@H](Cc1ccc(Cl)cc1)C(=O)N1CCN(c2ncnc3[nH]cc(C4CC4)c23)CC1	C22H25ClN6O	424.93	30	15	0.41	6	4	2	124.63	91.14	2.8	3.01	1.88	2.41	3.17	2.65	-4.34	0.0192	4.52e-05	Moderately soluble	-4.59	0.011	2.58e-05	Moderately soluble	-6	0.00043	1.01e-06	Moderately soluble	High	No	Yes	Yes	Yes	Yes	Yes	Yes	-6.75	0	0	0	0	0	0.55	0	0	1	3.47
ZINC000064539264	N[C@H](Cc1ccc(Cl)cc1)C(=O)N1CCN(c2ncnc3[nH]cc(Cl)c23)CC1	C19H20Cl2N6O	419.31	28	15	0.32	5	4	2	117.18	91.14	2.46	2.73	1.72	1.98	2.86	2.35	-4.23	0.0249	5.94e-05	Moderately soluble	-4.3	0.0211	5.03e-05	Moderately soluble	-6.02	0.000403	9.62e-07	Poorly soluble	High	No	Yes	Yes	Yes	Yes	Yes	Yes	-6.92	0	0	0	0	0	0.55	0	0	1	3.1
ZINC000064539400	Cc1ccc(-c2nc3c(C)nc(N)nc3n(C3CCOCC3)c2=O)cn1	C18H20N6O2	352.39	26	16	0.39	2	6	1	98.62	108.81	2.79	0.94	1.81	0.61	2.13	1.66	-2.94	0.404	0.00115	Soluble	-2.81	0.544	0.00154	Soluble	-5.08	0.00291	8.26e-06	Moderately soluble	High	No	Yes	Yes	No	No	No	Yes	-7.78	0	0	0	0	0	0.55	0	0	1	3.27
ZINC000064539670	Cc1ccc2c(N3CCN(C(=O)[C@H](N)Cc4ccc(Cl)cc4)CC3)ncnc2c1	C22H24ClN5O	409.91	29	16	0.32	5	4	1	122.78	75.35	3.7	3.34	2.05	2.77	3.22	3.02	-4.56	0.0112	2.73e-05	Moderately soluble	-4.6	0.0103	2.51e-05	Moderately soluble	-6.59	0.000106	2.59e-07	Poorly soluble	High	Yes	Yes	No	No	Yes	Yes	Yes	-6.43	0	0	0	0	0	0.55	0	0	1	3.19
ZINC000064539816	N[C@H](Cc1ccc(Cl)cc1)C(=O)N1CCN(c2ncnc3cc(F)ccc23)CC1	C21H21ClFN5O	413.88	29	16	0.29	5	5	1	117.77	75.35	3.51	3.08	2.3	2.66	3.12	2.93	-4.42	0.0156	3.76e-05	Moderately soluble	-4.33	0.0194	4.68e-05	Moderately soluble	-6.47	0.000139	3.35e-07	Poorly soluble	High	Yes	Yes	No	Yes	Yes	Yes	Yes	-6.64	0	0	0	0	0	0.55	0	0	1	3.19
ZINC000064539823	CC(=O)Nc1ccc2ncnc(N3CCN(C(=O)[C@H](N)Cc4ccc(Cl)cc4)CC3)c2c1	C23H25ClN6O2	452.94	32	16	0.3	7	5	2	132.13	104.45	2.93	2.15	1.51	1.73	2.38	2.14	-3.91	0.0556	0.000123	Soluble	-3.98	0.0479	0.000106	Soluble	-6.55	0.000129	2.84e-07	Poorly soluble	High	No	Yes	No	No	Yes	Yes	Yes	-7.54	0	1	0	0	0	0.55	0	0	1	3.35
ZINC000064539886	N[C@H](Cc1ccc(C(F)(F)F)cc1)C(=O)N1CCN(c2ncnc3ccccc23)CC1	C22H22F3N5O	429.44	31	16	0.32	6	7	1	117.81	75.35	3.17	3.23	3.26	2.88	3.12	3.13	-4.52	0.0129	3e-05	Moderately soluble	-4.49	0.014	3.27e-05	Moderately soluble	-6.45	0.000152	3.53e-07	Poorly soluble	High	Yes	Yes	No	Yes	Yes	Yes	Yes	-6.63	0	0	0	0	0	0.55	0	0	1	3.2
ZINC000064539889	N[C@H](Cc1ccc(-c2ccccc2)cc1)C(=O)N1CCN(c2ncnc3ccccc23)CC1	C27H27N5O	437.54	33	22	0.22	6	4	1	138.24	75.35	3.61	3.98	2.75	3.11	3.61	3.41	-5.16	0.00304	6.96e-06	Moderately soluble	-5.26	0.00238	5.45e-06	Moderately soluble	-8.07	3.69e-06	8.43e-09	Poorly soluble	High	Yes	Yes	No	Yes	Yes	Yes	Yes	-6.14	0	1	0	0	0	0.55	0	0	2	3.45
ZINC000064539890	CNC[C@H](Cc1ccc(Cl)cc1)C(=O)N1CCN(c2ncnc3[nH]ccc23)CC1	C21H25ClN6O	412.92	29	15	0.38	7	4	2	121.88	77.15	3.04	2.51	1.58	2.2	3.06	2.48	-3.9	0.0517	0.000125	Soluble	-3.78	0.0692	0.000168	Soluble	-6.61	0.000101	2.45e-07	Poorly soluble	High	No	Yes	Yes	No	Yes	Yes	Yes	-7.04	0	0	0	0	0	0.55	0	0	1	3.28
ZINC000064539955	N[C@H](Cc1ccc(Cl)c(Cl)c1)C(=O)N1CCN(c2ncnc3ccccc23)CC1	C21H21Cl2N5O	430.33	29	16	0.29	5	4	1	122.83	75.35	3.38	3.6	2.39	2.77	3.34	3.1	-4.85	0.00602	1.4e-05	Moderately soluble	-4.87	0.00581	1.35e-05	Moderately soluble	-6.8	6.88e-05	1.6e-07	Poorly soluble	High	Yes	No	Yes	Yes	Yes	Yes	Yes	-6.37	0	0	0	0	0	0.55	0	0	2	3.12
ZINC000064539956	N[C@H](Cc1ccc(F)c(F)c1)C(=O)N1CCN(c2ncnc3ccccc23)CC1	C21H21F2N5O	397.42	29	16	0.29	5	6	1	112.72	75.35	3.2	2.55	2.21	2.56	2.9	2.68	-3.99	0.0408	0.000103	Soluble	-3.78	0.066	0.000166	Soluble	-6.15	0.000279	7.03e-07	Poorly soluble	High	Yes	Yes	No	No	Yes	Yes	Yes	-6.91	0	0	0	0	0	0.55	0	0	1	3.19
ZINC000064539962	N[C@H](Cc1ccc(Cl)cc1)C(=O)N1CCN(c2ncnc3ccc(-c4ccccc4)cc23)CC1	C27H26ClN5O	471.98	34	22	0.22	6	4	1	143.25	75.35	3.86	4.6	3.41	3.58	4.25	3.94	-5.75	0.000845	1.79e-06	Moderately soluble	-5.91	0.000585	1.24e-06	Moderately soluble	-8.65	1.04e-06	2.21e-09	Poorly soluble	High	Yes	Yes	No	Yes	Yes	Yes	Yes	-5.91	0	1	0	0	0	0.55	0	0	2	3.51
ZINC000064539979	NC[C@@H](Cc1ccc(Cl)cc1)C(=O)N1CCN(c2ncnc3[nH]ccc23)CC1	C20H23ClN6O	398.89	28	15	0.35	6	4	2	116.97	91.14	2.59	2	1.32	1.98	2.6	2.1	-3.57	0.106	0.000267	Soluble	-3.54	0.115	0.000288	Soluble	-5.82	0.000598	1.5e-06	Moderately soluble	High	No	Yes	No	No	No	Yes	Yes	-7.31	0	0	0	0	0	0.55	0	0	1	3.15
ZINC000064540049	N[C@H](Cc1ccc(Br)cc1)C(=O)N1CCN(c2ncnc3ccccc23)CC1	C21H22BrN5O	440.34	28	16	0.29	5	4	1	120.51	75.35	3.18	3.04	1.85	2.66	2.74	2.69	-4.58	0.0116	2.64e-05	Moderately soluble	-4.29	0.0227	5.15e-05	Moderately soluble	-6.41	0.000172	3.92e-07	Poorly soluble	High	No	Yes	No	No	Yes	Yes	Yes	-6.83	0	0	0	0	0	0.55	0	0	1	3.08
ZINC000064540068	CN(C)C[C@H](Cc1ccc(Cl)cc1)C(=O)N1CCN(c2ncnc3[nH]ccc23)CC1	C22H27ClN6O	426.94	30	15	0.41	7	4	1	126.78	68.36	3.21	2.98	1.92	2.41	3.01	2.71	-4.27	0.0228	5.34e-05	Moderately soluble	-4.08	0.0356	8.33e-05	Moderately soluble	-6.27	0.00023	5.38e-07	Poorly soluble	High	Yes	Yes	No	Yes	Yes	Yes	Yes	-6.79	0	0	0	0	0	0.55	0	0	1	3.39
ZINC000064540169	CC(C)(C)c1ccc2ncnc(N3CCN(C(=O)[C@H](N)Cc4ccc(Cl)cc4)CC3)c2c1	C25H30ClN5O	451.99	32	16	0.4	6	4	1	137.09	75.35	3.94	4.65	3.04	3.39	4.08	3.82	-5.55	0.00129	2.85e-06	Moderately soluble	-5.96	0.000497	1.1e-06	Moderately soluble	-7.37	1.93e-05	4.28e-08	Poorly soluble	High	Yes	Yes	No	Yes	Yes	Yes	Yes	-5.76	0	1	0	0	0	0.55	0	0	2	3.54
ZINC000064540813	N[C@H](Cc1ccc(Cl)cc1)C(=O)N1CCN(c2ccnc3ccccc23)CC1	C22H23ClN4O	394.9	28	16	0.27	5	3	1	120.02	62.46	3.32	3.29	2.35	2.5	3.27	2.95	-4.45	0.0139	3.52e-05	Moderately soluble	-4.28	0.0209	5.29e-05	Moderately soluble	-6.58	0.000103	2.61e-07	Poorly soluble	High	Yes	Yes	No	Yes	Yes	Yes	Yes	-6.37	0	0	0	0	0	0.55	0	0	1	2.9
ZINC000064540982	Cc1ccc(C[C@@H](N)C(=O)N2CCN(c3ncnc4ccccc34)CC2)cc1	C22H25N5O	375.47	28	16	0.32	5	4	1	117.77	75.35	3.16	2.79	1.4	2.29	2.58	2.44	-4.02	0.036	9.58e-05	Moderately soluble	-4.03	0.0351	9.36e-05	Moderately soluble	-6	0.000376	1e-06	Moderately soluble	High	No	Yes	No	No	Yes	Yes	Yes	-6.61	0	0	0	0	0	0.55	0	0	1	3.1
ZINC000064540983	N[C@H](Cc1ccc(Cl)cc1)C(=O)N1CCN(c2ncnc3[nH]ccc23)CC1	C19H21ClN6O	384.86	27	15	0.32	5	4	2	112.17	91.14	2.45	2.1	1.07	1.76	2.22	1.92	-3.63	0.0902	0.000234	Soluble	-3.64	0.0873	0.000227	Soluble	-5.43	0.00143	3.71e-06	Moderately soluble	High	No	Yes	Yes	No	No	Yes	Yes	-7.16	0	0	0	0	0	0.55	0	0	1	3.04
ZINC000064540985	N[C@H](Cc1ccc(Cl)cc1)C(=O)N1CCN(c2ncnc3[nH]ncc23)CC1	C18H20ClN7O	385.85	27	15	0.33	5	5	2	109.96	104.03	1.64	1.6	0.46	1.55	1.66	1.38	-3.32	0.184	0.000477	Soluble	-3.4	0.155	0.000402	Soluble	-5.06	0.00338	8.75e-06	Moderately soluble	High	No	Yes	No	No	No	No	No	-7.52	0	0	0	0	0	0.55	0	0	1	3.03
ZINC000064541126	N[C@H](Cc1ccc(Cl)cc1)C(=O)N1CCN(c2ncnc3ccc(-c4cn[nH]c4)cc23)CC1	C24H24ClN7O	461.95	33	21	0.25	6	5	2	135.4	104.03	2.78	2.9	2.13	2.23	3.19	2.65	-4.61	0.0114	2.48e-05	Moderately soluble	-4.75	0.00831	1.8e-05	Moderately soluble	-7.5	1.45e-05	3.13e-08	Poorly soluble	High	No	Yes	No	Yes	Yes	Yes	Yes	-7.06	0	1	0	0	0	0.55	0	0	1	3.48
ZINC000064541128	Nc1ccc2ncnc(N3CCN(C(=O)[C@H](N)Cc4ccc(Cl)cc4)CC3)c2c1	C21H23ClN6O	410.9	29	16	0.29	5	4	2	122.22	101.37	2.92	2.3	1.33	1.76	1.98	2.06	-3.91	0.05	0.000122	Soluble	-4.07	0.0352	8.58e-05	Moderately soluble	-5.84	0.000594	1.45e-06	Moderately soluble	High	No	Yes	Yes	No	Yes	Yes	Yes	-7.17	0	0	0	0	0	0.55	0	1	1	3.13
ZINC000064548760	N[C@H](Cc1ccc(Cl)cc1)C(=O)N1CCN(c2ccnc3[nH]ccc23)CC1	C20H22ClN5O	383.87	27	15	0.3	5	3	2	114.37	78.25	2.56	2.42	1.67	1.97	2.78	2.28	-3.83	0.0573	0.000149	Soluble	-3.71	0.0756	0.000197	Soluble	-5.8	0.000603	1.57e-06	Moderately soluble	High	No	Yes	Yes	Yes	Yes	Yes	Yes	-6.92	0	0	0	0	0	0.55	0	0	1	2.94
ZINC000064548761	N[C@H](Cc1ccc(Cl)cc1)C(=O)N1CCN(c2cnc3ccccn23)CC1	C20H22ClN5O	383.87	27	15	0.3	5	3	1	113.47	66.87	3.11	3.2	1.44	2.11	1.7	2.31	-4.32	0.0185	4.82e-05	Moderately soluble	-4.28	0.0203	5.3e-05	Moderately soluble	-4.98	0.00403	1.05e-05	Moderately soluble	High	Yes	No	Yes	Yes	Yes	Yes	Yes	-6.37	0	0	0	0	0	0.55	0	0	1	3.25
ZINC000064548790	CNc1ccc2ncnc(N3CCN(C(=O)[C@H](N)Cc4ccc(Cl)cc4)CC3)c2c1	C22H25ClN6O	424.93	30	16	0.32	6	4	2	127.12	87.38	3.28	2.96	1.59	1.97	2.44	2.45	-4.34	0.0195	4.59e-05	Moderately soluble	-4.46	0.0148	3.49e-05	Moderately soluble	-6.62	0.000101	2.37e-07	Poorly soluble	High	No	Yes	Yes	No	Yes	Yes	Yes	-6.79	0	0	0	0	0	0.55	0	0	1	3.26
ZINC000064548791	CN(C)c1ccc2ncnc(N3CCN(C(=O)[C@H](N)Cc4ccc(Cl)cc4)CC3)c2c1	C23H27ClN6O	438.95	31	16	0.35	6	4	1	132.02	78.59	3.5	3.1	1.81	2.18	2.38	2.59	-4.5	0.0139	3.16e-05	Moderately soluble	-4.42	0.0167	3.82e-05	Moderately soluble	-6.28	0.000229	5.21e-07	Poorly soluble	High	No	Yes	No	No	Yes	Yes	Yes	-6.78	0	1	0	0	0	0.55	0	0	1	3.38
ZINC000064548955	N[C@H](Cc1ccc(Cl)cc1)C(=O)N1CCN(c2ncnc3ccccc23)CC1	C21H22ClN5O	395.89	28	16	0.29	5	4	1	117.82	75.35	3.26	2.98	1.74	2.56	2.7	2.65	-4.26	0.0215	5.44e-05	Moderately soluble	-4.23	0.0235	5.94e-05	Moderately soluble	-6.21	0.000244	6.15e-07	Poorly soluble	High	No	Yes	No	No	Yes	Yes	Yes	-6.6	0	0	0	0	0	0.55	0	0	1	3.04
ZINC000064549108	N#Cc1ccc(C[C@@H](N)C(=O)N2CCN(c3ncnc4ccccc34)CC2)cc1	C22H22N6O	386.45	29	16	0.27	5	5	1	117.52	99.14	2.92	2.07	0.96	1.41	2.09	1.89	-3.62	0.0931	0.000241	Soluble	-3.78	0.064	0.000166	Soluble	-5.69	0.000791	2.05e-06	Moderately soluble	High	No	Yes	No	No	Yes	Yes	Yes	-7.19	0	0	0	0	0	0.55	0	0	1	3.15
ZINC000064549152	Cc1nc(N)nc2c1nc(-c1cc[nH]n1)c(=O)n2C1CCOCC1	C15H17N7O2	327.34	24	15	0.4	2	6	2	88.01	124.6	1.75	0.23	0.83	-0.05	1.18	0.79	-2.34	1.48	0.00452	Soluble	-2.41	1.28	0.00392	Soluble	-3.92	0.0392	0.00012	Soluble	High	No	Yes	No	No	No	No	No	-8.13	0	0	0	0	0	0.55	0	0	0	3.06
ZINC000064549160	N[C@H](Cc1ccc(Cl)cc1)C(=O)N1CCN(c2ccnc3ccnn23)CC1	C19H21ClN6O	384.86	27	15	0.32	5	4	1	111.27	79.76	2.59	1.76	0.84	2.16	1.14	1.7	-3.42	0.148	0.000384	Soluble	-3.05	0.341	0.000886	Soluble	-4.61	0.00953	2.48e-05	Moderately soluble	High	No	Yes	No	No	No	Yes	No	-7.4	0	0	0	0	0	0.55	0	0	1	3.24
ZINC000064549196	N[C@H](Cc1ccc(Cl)cc1)C(=O)N1CCN(c2ncnc3cc[nH]c23)CC1	C19H21ClN6O	384.86	27	15	0.32	5	4	2	112.17	91.14	1.97	1.85	1.07	1.35	2.22	1.69	-3.47	0.13	0.000337	Soluble	-3.38	0.159	0.000412	Soluble	-5.43	0.00143	3.71e-06	Moderately soluble	High	No	Yes	No	No	No	Yes	Yes	-7.33	0	0	0	0	0	0.55	0	0	1	3.19
ZINC000064549199	N[C@H](Cc1ccccc1)C(=O)N1CCN(c2ncnc3ccccc23)CC1	C21H23N5O	361.44	27	16	0.29	5	4	1	112.81	75.35	3.19	2.43	1.09	2.07	2.06	2.17	-3.72	0.0688	0.00019	Soluble	-3.66	0.08	0.000221	Soluble	-5.62	0.000863	2.39e-06	Moderately soluble	High	No	Yes	No	No	Yes	Yes	Yes	-6.78	0	0	0	0	0	0.55	0	0	1	2.99
ZINC000064549212	Cc1c[nH]c2ncnc(N3CCN(C(=O)[C@H](N)Cc4ccc(Cl)cc4)CC3)c12	C20H23ClN6O	398.89	28	15	0.35	5	4	2	117.13	91.14	2.89	2.46	1.38	1.98	2.73	2.29	-3.93	0.0469	0.000118	Soluble	-4.02	0.0383	9.6e-05	Moderately soluble	-5.81	0.000622	1.56e-06	Moderately soluble	High	No	Yes	Yes	No	Yes	Yes	Yes	-6.99	0	0	0	0	0	0.55	0	0	1	3.19
ZINC000064549300	N[C@H](Cc1ccc(F)cc1)C(=O)N1CCN(c2ncnc3ccccc23)CC1	C21H22FN5O	379.43	28	16	0.29	5	5	1	112.76	75.35	2.85	2.45	1.65	2.45	2.48	2.37	-3.83	0.0563	0.000148	Soluble	-3.68	0.08	0.000211	Soluble	-5.89	0.000491	1.29e-06	Moderately soluble	High	No	Yes	No	No	Yes	Yes	Yes	-6.88	0	0	0	0	0	0.55	0	0	1	3.06
ZINC000064549301	N[C@H](Cc1ccc(Cl)cc1)C(=O)N1CCN(c2ccnc3cc[nH]c23)CC1	C20H22ClN5O	383.87	27	15	0.3	5	3	2	114.37	78.25	2.68	2.17	1.67	1.56	2.78	2.17	-3.67	0.0824	0.000215	Soluble	-3.45	0.137	0.000358	Soluble	-5.8	0.000603	1.57e-06	Moderately soluble	High	No	Yes	Yes	Yes	No	Yes	Yes	-7.1	0	0	0	0	0	0.55	0	0	1	3.09
ZINC000064744145	CCOCCN(C[C@@H](O)CN1CCC[C@@]2(CCc3c(ccc4[nH]ncc34)O2)C1)S(=O)(=O)c1c(C)cccc1C	C29H40N4O5S	556.72	39	15	0.55	10	8	2	155.55	116.37	3.09	3.5	4.13	1.72	4	3.29	-5.12	0.00421	7.56e-06	Moderately soluble	-5.63	0.00131	2.36e-06	Moderately soluble	-7.85	7.9e-06	1.42e-08	Poorly soluble	High	No	Yes	No	No	No	Yes	Yes	-7.21	1	3	0	0	0	0.55	0	0	2	5.65
ZINC000064744203	CC(=O)Nc1nc2ccc(-c3cnc(Cl)c(NS(=O)(=O)c4ccc(F)cc4)c3)cc2s1	C20H14ClFN4O3S2	476.93	31	21	0.05	6	6	2	119.25	137.67	2.5	4.03	6.03	2.54	4.34	3.89	-5.44	0.00173	3.62e-06	Moderately soluble	-6.62	0.000113	2.38e-07	Poorly soluble	-8.74	8.7e-07	1.82e-09	Poorly soluble	Low	No	No	No	Yes	Yes	No	Yes	-6.35	0	1	0	2	0	0.55	0	1	2	3.37
ZINC000064744214	CCOCCN(C[C@@H](O)CN1CCC[C@@]2(CC(=O)c3cc(O)ccc3O2)C1)S(=O)(=O)c1c(C)cccc1C	C28H38N2O7S	546.68	38	12	0.54	10	9	2	148.34	124.99	3.17	2.61	3.6	0.79	3.26	2.69	-4.45	0.0195	3.57e-05	Moderately soluble	-4.88	0.00713	1.31e-05	Moderately soluble	-6.66	0.00012	2.19e-07	Poorly soluble	High	No	Yes	No	No	No	Yes	Yes	-7.78	1	3	0	0	0	0.55	0	0	2	5.56
ZINC000064754846	CCc1c[nH]c2ncnc(N3CCN(C(=O)[C@H](N)Cc4ccc(Cl)cc4)CC3)c12	C21H25ClN6O	412.92	29	15	0.38	6	4	2	121.94	91.14	2.48	2.9	1.63	2.2	3.12	2.47	-4.21	0.0252	6.11e-05	Moderately soluble	-4.47	0.0138	3.35e-05	Moderately soluble	-6.2	0.000261	6.32e-07	Poorly soluble	High	No	Yes	No	Yes	Yes	Yes	Yes	-6.76	0	0	0	0	0	0.55	0	0	1	3.39
ZINC000066058774	CC[C@H]1SCc2ncnc(N3CCN(C(=O)[C@H](N)Cc4ccc(Cl)cc4)CC3)c21	C21H26ClN5OS	431.98	29	12	0.48	6	4	1	125.33	100.65	3.52	2.62	1.81	2.21	3.23	2.68	-4.08	0.036	8.33e-05	Moderately soluble	-4.38	0.0179	4.13e-05	Moderately soluble	-5.73	0.000812	1.88e-06	Moderately soluble	High	No	Yes	No	Yes	No	Yes	Yes	-7.07	0	0	0	0	0	0.55	0	0	1	4.29
ZINC000066058775	CC[C@@H]1SCc2ncnc(N3CCN(C(=O)[C@H](N)Cc4ccc(Cl)cc4)CC3)c21	C21H26ClN5OS	431.98	29	12	0.48	6	4	1	125.33	100.65	3.56	2.62	1.81	2.21	3.23	2.68	-4.08	0.036	8.33e-05	Moderately soluble	-4.38	0.0179	4.13e-05	Moderately soluble	-5.73	0.000812	1.88e-06	Moderately soluble	High	No	Yes	No	Yes	No	Yes	Yes	-7.07	0	0	0	0	0	0.55	0	0	1	4.29
ZINC000066058776	C[C@@H]1SCc2ncnc(N3CCN(C(=O)[C@H](N)Cc4ccc(Cl)cc4)CC3)c21	C20H24ClN5OS	417.96	28	12	0.45	5	4	1	120.53	100.65	3.32	2.1	1.42	1.99	2.84	2.33	-3.74	0.0758	0.000181	Soluble	-3.84	0.0599	0.000143	Soluble	-5.33	0.00193	4.62e-06	Moderately soluble	High	No	Yes	No	Yes	No	Yes	Yes	-7.36	0	0	0	0	0	0.55	0	0	1	4.1
ZINC000066058777	C[C@H]1SCc2ncnc(N3CCN(C(=O)[C@H](N)Cc4ccc(Cl)cc4)CC3)c21	C20H24ClN5OS	417.96	28	12	0.45	5	4	1	120.53	100.65	3.2	2.1	1.42	1.99	2.84	2.31	-3.74	0.0758	0.000181	Soluble	-3.84	0.0599	0.000143	Soluble	-5.33	0.00193	4.62e-06	Moderately soluble	High	No	Yes	No	Yes	No	Yes	Yes	-7.36	0	0	0	0	0	0.55	0	0	1	4.1
ZINC000066058778	C[C@@H]1SCc2ncnc(N3CCN(C(=O)[C@H](N)Cc4ccc(Cl)c(F)c4)CC3)c21	C20H23ClFN5OS	435.95	29	12	0.45	5	5	1	120.48	100.65	3.39	2.2	1.98	2.37	3.26	2.64	-3.91	0.0542	0.000124	Soluble	-3.95	0.0492	0.000113	Soluble	-5.6	0.0011	2.53e-06	Moderately soluble	High	No	Yes	No	Yes	No	Yes	Yes	-7.4	0	0	0	0	0	0.55	0	0	1	4.17
ZINC000066058868	C[C@@H]1SCc2ncnc(N3CCN(C(=O)[C@H](N)Cc4ccc(F)cc4)CC3)c21	C20H24FN5OS	401.5	28	12	0.45	5	5	1	115.47	100.65	2.87	1.57	1.32	1.88	2.62	2.05	-3.31	0.199	0.000495	Soluble	-3.29	0.204	0.000508	Soluble	-5.01	0.0039	9.71e-06	Moderately soluble	High	No	Yes	No	No	No	Yes	Yes	-7.63	0	0	0	0	0	0.55	0	0	1	4.12
ZINC000066058869	C[C@@H]1SCc2ncnc(N3CCN(C(=O)[C@H](N)Cc4ccc(F)c(F)c4)CC3)c21	C20H23F2N5OS	419.49	29	12	0.45	5	6	1	115.43	100.65	3.36	1.67	1.88	2.26	3.04	2.44	-3.47	0.142	0.00034	Soluble	-3.4	0.168	0.0004	Soluble	-5.28	0.00222	5.3e-06	Moderately soluble	High	No	Yes	No	No	No	Yes	Yes	-7.67	0	0	0	0	0	0.55	0	0	1	4.18
ZINC000066058874	CC(C)NC[C@H](Cc1ccc(F)c(F)c1)C(=O)N1CCN(c2ncnc3c2[C@H](C)SC3)CC1	C24H31F2N5OS	475.6	33	12	0.54	8	6	1	134.75	86.66	4.17	2.88	3.17	3.11	4.52	3.57	-4.34	0.0215	4.53e-05	Moderately soluble	-4.36	0.0208	4.37e-05	Moderately soluble	-6.86	6.6e-05	1.39e-07	Poorly soluble	High	No	Yes	No	No	No	Yes	Yes	-7.16	0	1	0	0	0	0.55	0	0	2	4.64
ZINC000066058875	CC(C)NC[C@@H](Cc1ccc(F)c(F)c1)C(=O)N1CCN(c2ncnc3c2[C@H](C)SC3)CC1	C24H31F2N5OS	475.6	33	12	0.54	8	6	1	134.75	86.66	3.93	2.88	3.17	3.11	4.52	3.52	-4.34	0.0215	4.53e-05	Moderately soluble	-4.36	0.0208	4.37e-05	Moderately soluble	-6.86	6.6e-05	1.39e-07	Poorly soluble	High	No	Yes	No	No	No	Yes	Yes	-7.16	0	1	0	0	0	0.55	0	0	2	4.64
ZINC000066058891	C[C@@H]1SCc2ncnc(N3CCN(C(=O)[C@@H](Cc4ccc(Cl)cc4)CC(C)(C)N)CC3)c21	C24H32ClN5OS	474.06	32	12	0.54	7	4	1	139.79	100.65	3.71	2.97	2.83	2.84	4.09	3.29	-4.47	0.0162	3.42e-05	Moderately soluble	-4.75	0.00849	1.79e-05	Moderately soluble	-6.51	0.000148	3.11e-07	Poorly soluble	High	No	Yes	No	No	No	Yes	Yes	-7.08	0	1	0	0	0	0.55	0	0	1	4.57
ZINC000066058892	C[C@@H]1SCc2ncnc(N3CCN(C(=O)[C@H](Cc4ccc(Cl)cc4)CC(C)(C)N)CC3)c21	C24H32ClN5OS	474.06	32	12	0.54	7	4	1	139.79	100.65	3.96	2.97	2.83	2.84	4.09	3.34	-4.47	0.0162	3.42e-05	Moderately soluble	-4.75	0.00849	1.79e-05	Moderately soluble	-6.51	0.000148	3.11e-07	Poorly soluble	High	No	Yes	No	No	No	Yes	Yes	-7.08	0	1	0	0	0	0.55	0	0	1	4.57
ZINC000066058893	C[C@@H]1SCc2ncnc(N3CCN(C(=O)[C@@H](Cc4ccc(Cl)c(F)c4)CC(C)(C)N)CC3)c21	C24H31ClFN5OS	492.05	33	12	0.54	7	5	1	139.75	100.65	4.05	3.07	3.39	3.21	4.51	3.65	-4.63	0.0115	2.33e-05	Moderately soluble	-4.85	0.00694	1.41e-05	Moderately soluble	-6.77	8.43e-05	1.71e-07	Poorly soluble	High	No	Yes	No	No	No	Yes	Yes	-7.12	0	2	0	0	0	0.55	0	0	1	4.63
ZINC000066058894	C[C@@H]1SCc2ncnc(N3CCN(C(=O)[C@H](Cc4ccc(Cl)c(F)c4)CC(C)(C)N)CC3)c21	C24H31ClFN5OS	492.05	33	12	0.54	7	5	1	139.75	100.65	4	3.07	3.39	3.21	4.51	3.64	-4.63	0.0115	2.33e-05	Moderately soluble	-4.85	0.00694	1.41e-05	Moderately soluble	-6.77	8.43e-05	1.71e-07	Poorly soluble	High	No	Yes	No	No	No	Yes	Yes	-7.12	0	2	0	0	0	0.55	0	0	1	4.63
ZINC000066066134	CCCCCCCCCCCCc1ccc(S(=O)(=O)Nc2nnc(CC(=O)O)s2)cc1	C22H33N3O4S2	467.65	31	11	0.59	16	6	2	126.41	145.87	3.11	6.53	6.32	2.92	5.71	4.92	-6.06	0.000407	8.71e-07	Poorly soluble	-9.39	1.9e-07	4.07e-10	Poorly soluble	-7.89	6.01e-06	1.29e-08	Poorly soluble	Low	No	No	Yes	Yes	Yes	Yes	Yes	-4.52	0	1	2	2	2	0.56	0	0	3	4.35
ZINC000066066578	CCCCCCCCCCCCc1ccc(S(=O)(=O)Nc2nnc(CC(=O)OCC)s2)cc1	C24H37N3O4S2	495.7	33	11	0.62	18	6	1	135.54	134.87	4.22	7.63	6.8	3.34	6.69	5.74	-6.78	8.25e-05	1.66e-07	Poorly soluble	-10.3	2.48e-08	5e-11	Insoluble	-8.97	5.34e-07	1.08e-09	Poorly soluble	Low	No	Yes	Yes	Yes	Yes	Yes	Yes	-3.91	0	3	1	2	2	0.55	0	0	3	4.68
ZINC000066066580	CCCCCCCCCCCCc1ccc(S(=O)(=O)Nc2nnc(CO)s2)cc1	C21H33N3O3S2	439.64	29	11	0.62	15	5	2	120.99	128.8	3.26	6.18	6.03	2.76	5.73	4.79	-5.75	0.000782	1.78e-06	Moderately soluble	-8.67	9.42e-07	2.14e-09	Poorly soluble	-7.97	4.7e-06	1.07e-08	Poorly soluble	Low	No	No	No	Yes	Yes	Yes	Yes	-4.59	0	1	1	1	1	0.55	0	0	3	4.29
ZINC000066073899	CCCCCCCCCCCCc1ccc(S(=O)(=O)Nc2nnc(S(N)(=O)=O)s2)cc1	C20H32N4O4S3	488.69	31	11	0.6	15	7	2	125.86	177.11	2.92	6.33	6.42	1.88	3.99	4.31	-6.13	0.000362	7.41e-07	Poorly soluble	-9.84	7.08e-08	1.45e-10	Poorly soluble	-7.66	1.08e-05	2.21e-08	Poorly soluble	Low	No	No	No	Yes	Yes	Yes	Yes	-4.79	0	2	2	2	2	0.55	0	0	3	4.33
ZINC000066074767	CCCCCCCCCCCCCCc1ccc(S(=O)(=O)Nc2nncs2)cc1	C22H35N3O2S2	437.66	29	11	0.64	16	4	1	124.48	108.57	4.62	8.52	7.47	3.8	6.6	6.2	-7.15	3.13e-05	7.15e-08	Poorly soluble	-10.67	9.31e-09	2.13e-11	Insoluble	-8.95	4.89e-07	1.12e-09	Poorly soluble	Low	No	No	No	Yes	Yes	No	Yes	-2.92	0	1	1	1	2	0.55	0	0	3	4.21
ZINC000066075268	CCCCCCCCCC(=O)Nc1ccc(S(=O)(=O)Nc2nnc(C(=O)OCC)s2)cc1	C21H30N4O5S2	482.62	32	11	0.52	16	7	2	125.88	163.97	2.83	5.03	5.29	2	4.26	3.88	-5.2	0.00305	6.32e-06	Moderately soluble	-8.21	2.95e-06	6.11e-09	Poorly soluble	-7.36	2.09e-05	4.33e-08	Poorly soluble	Low	No	No	Yes	Yes	Yes	Yes	Yes	-5.67	0	1	2	1	3	0.55	0	0	3	4.09
ZINC000066075471	CCCCCCCCCCCCCCCCc1ccc(S(=O)(=O)Nc2nncs2)cc1	C24H39N3O2S2	465.72	31	11	0.67	18	4	1	134.09	108.57	4.5	9.6	8.25	4.22	7.43	6.8	-7.85	6.58e-06	1.41e-08	Poorly soluble	-11.79	7.5e-10	1.61e-12	Insoluble	-9.73	8.61e-08	1.85e-10	Poorly soluble	Low	No	Yes	No	Yes	Yes	No	Yes	-2.32	1	2	1	1	2	0.55	0	0	3	4.44
ZINC000066078206	CCCCCCCCCC(=O)Nc1ccc(S(=O)(=O)Nc2nnc(CC)s2)cc1	C20H30N4O3S2	438.61	29	11	0.55	14	5	2	119.56	137.67	3.19	4.94	5.68	2.34	4.72	4.17	-5.03	0.00411	9.37e-06	Moderately soluble	-7.57	1.18e-05	2.7e-08	Poorly soluble	-7.72	8.36e-06	1.91e-08	Poorly soluble	Low	No	No	No	Yes	Yes	Yes	Yes	-5.47	0	1	1	1	0	0.55	0	0	3	3.89
ZINC000066078210	CCCCCCCCCC(=O)Nc1ccc(S(=O)(=O)Nc2nnc(CC(=O)O)s2)cc1	C20H28N4O5S2	468.59	31	11	0.5	15	7	3	121.34	174.97	2.31	3.98	4.74	1.51	3.7	3.25	-4.53	0.014	2.98e-05	Moderately soluble	-7.36	2.07e-05	4.41e-08	Poorly soluble	-6.68	9.88e-05	2.11e-07	Poorly soluble	Low	No	No	No	Yes	Yes	Yes	Yes	-6.33	0	0	2	1	1	0.11	0	0	3	3.96
ZINC000066078212	CCCCCCCCCC(=O)Nc1ccc(S(=O)(=O)Nc2nnc(CC(=O)OCC)s2)cc1	C22H32N4O5S2	496.64	33	11	0.55	17	7	2	130.46	163.97	3.99	4.67	5.22	1.95	4.67	4.1	-4.99	0.00513	1.03e-05	Moderately soluble	-7.84	7.17e-06	1.44e-08	Poorly soluble	-7.75	8.77e-06	1.77e-08	Poorly soluble	Low	No	No	Yes	Yes	Yes	Yes	Yes	-6.01	0	2	2	1	2	0.55	0	0	3	4.27
ZINC000066098107	CCCCCCCCCCCCc1ccc(S(=O)(=O)Nc2nnc(CC)s2)cc1	C22H35N3O2S2	437.66	29	11	0.64	15	4	1	124.64	108.57	4.12	7.9	7.25	3.8	6.73	5.96	-6.82	6.61e-05	1.51e-07	Poorly soluble	-10.03	4.09e-08	9.35e-11	Insoluble	-8.94	5.08e-07	1.16e-09	Poorly soluble	Low	No	No	No	Yes	Yes	No	Yes	-3.36	0	1	1	1	1	0.55	0	0	3	4.36
ZINC000066157569	CCCCCCCCCCCCc1cccc(S(=O)(=O)Nc2nncs2)c1	C20H31N3O2S2	409.61	27	11	0.6	14	4	1	114.87	108.57	3.59	7.44	6.69	3.35	5.78	5.37	-6.44	0.000147	3.6e-07	Poorly soluble	-9.55	1.15e-07	2.81e-10	Poorly soluble	-8.17	2.78e-06	6.78e-09	Poorly soluble	Low	No	No	No	Yes	Yes	No	Yes	-3.52	0	1	1	1	1	0.55	0	0	3	4.02
ZINC000066166294	CCOCCN(C[C@@H](O)CN1CCC[C@@]2(CCN(c3ncnc4ccccc34)C2)C1)S(=O)(=O)c1c(C)cccc1C	C31H43N5O4S	581.77	41	16	0.55	11	8	1	169.18	107.48	3.98	3.94	3.95	2.34	3.51	3.54	-5.49	0.00187	3.22e-06	Moderately soluble	-5.9	0.000738	1.27e-06	Moderately soluble	-8.11	4.54e-06	7.8e-09	Poorly soluble	High	No	Yes	No	No	No	Yes	Yes	-7.05	1	3	1	0	0	0.55	0	0	3	5.61
ZINC000066167213	N[C@H](Cc1ccc(Cl)cc1)C(=O)N1CCN(c2ncnc3c2CSC3)CC1	C19H22ClN5OS	403.93	27	12	0.42	5	4	1	115.72	100.65	3.25	1.69	1.03	1.77	2.74	2.09	-3.41	0.158	0.000391	Soluble	-3.42	0.154	0.000381	Soluble	-5.19	0.0026	6.44e-06	Moderately soluble	High	No	Yes	No	Yes	No	Yes	Yes	-7.56	0	0	0	0	0	0.55	0	0	1	3.69
ZINC000066251384	C[C@@H]1OCc2ncnc(N3CCN(C(=O)[C@H](N)Cc4ccc(Cl)cc4)CC3)c21	C20H24ClN5O2	401.89	28	12	0.45	5	5	1	114.02	84.58	3.43	1.3	0.7	1.19	2.28	1.78	-3.14	0.293	0.000728	Soluble	-2.68	0.847	0.00211	Soluble	-4.98	0.00422	1.05e-05	Moderately soluble	High	No	Yes	No	No	No	Yes	Yes	-7.83	0	0	0	0	0	0.55	0	0	1	3.83
ZINC000066251581	C[C@@H]1SCc2ncnc(N3CCN(C(=O)[C@@H](Cc4ccc(Cl)cc4)C4(N)CC4)CC3)c21	C23H28ClN5OS	458.02	31	12	0.52	6	4	1	132.87	100.65	3.43	2.92	2.14	2.64	3.77	2.98	-4.41	0.0178	3.89e-05	Moderately soluble	-4.69	0.00925	2.02e-05	Moderately soluble	-6.11	0.000352	7.69e-07	Poorly soluble	High	No	Yes	No	Yes	Yes	Yes	Yes	-7.02	0	1	0	0	0	0.55	0	0	1	4.37
ZINC000066251582	C[C@@H]1SCc2ncnc(N3CCN(C(=O)[C@H](Cc4ccc(Cl)cc4)C4(N)CC4)CC3)c21	C23H28ClN5OS	458.02	31	12	0.52	6	4	1	132.87	100.65	3.61	2.92	2.14	2.64	3.77	3.01	-4.41	0.0178	3.89e-05	Moderately soluble	-4.69	0.00925	2.02e-05	Moderately soluble	-6.11	0.000352	7.69e-07	Poorly soluble	High	No	Yes	No	Yes	Yes	Yes	Yes	-7.02	0	1	0	0	0	0.55	0	0	1	4.37
ZINC000066252403	CC(C)NC[C@H](Cc1ccc(Cl)cc1)C(=O)N1CCN(c2ncnc3c2[C@H](C)SC3)CC1	C24H32ClN5OS	474.06	32	12	0.54	8	4	1	139.85	86.66	4.44	3.31	2.71	2.84	4.31	3.52	-4.61	0.0115	2.43e-05	Moderately soluble	-4.81	0.00741	1.56e-05	Moderately soluble	-6.92	5.74e-05	1.21e-07	Poorly soluble	High	No	Yes	No	No	No	Yes	Yes	-6.84	0	1	0	0	0	0.55	0	0	2	4.57
ZINC000066252404	CC(C)NC[C@@H](Cc1ccc(Cl)cc1)C(=O)N1CCN(c2ncnc3c2[C@H](C)SC3)CC1	C24H32ClN5OS	474.06	32	12	0.54	8	4	1	139.85	86.66	3.91	3.31	2.71	2.84	4.31	3.42	-4.61	0.0115	2.43e-05	Moderately soluble	-4.81	0.00741	1.56e-05	Moderately soluble	-6.92	5.74e-05	1.21e-07	Poorly soluble	High	No	Yes	No	No	No	Yes	Yes	-6.84	0	1	0	0	0	0.55	0	0	2	4.57
ZINC000066252405	C[C@@H]1SCc2ncnc(N3CCN(C(=O)[C@@H](Cc4ccc(Cl)cc4)CN4CCCC4)CC3)c21	C25H32ClN5OS	486.07	33	12	0.56	7	4	0	146.55	77.87	4.12	3.46	2.42	3.05	4.25	3.46	-4.84	0.00702	1.44e-05	Moderately soluble	-4.78	0.00812	1.67e-05	Moderately soluble	-6.47	0.000163	3.35e-07	Poorly soluble	High	Yes	Yes	No	No	Yes	Yes	Yes	-6.81	0	2	0	0	0	0.55	0	0	1	4.61
ZINC000066252406	C[C@@H]1SCc2ncnc(N3CCN(C(=O)[C@H](Cc4ccc(Cl)cc4)CN4CCCC4)CC3)c21	C25H32ClN5OS	486.07	33	12	0.56	7	4	0	146.55	77.87	4.28	3.46	2.42	3.05	4.25	3.49	-4.84	0.00702	1.44e-05	Moderately soluble	-4.78	0.00812	1.67e-05	Moderately soluble	-6.47	0.000163	3.35e-07	Poorly soluble	High	Yes	Yes	No	No	Yes	Yes	Yes	-6.81	0	2	0	0	0	0.55	0	0	1	4.61
ZINC000066252599	Cc1ccc(C[C@@H](CNC(C)C)C(=O)N2CCN(c3ncnc4c3[C@H](C)SC4)CC2)cc1	C25H35N5OS	453.64	32	12	0.56	8	4	1	139.8	86.66	4.11	3.05	2.36	2.58	4.19	3.26	-4.32	0.0215	4.75e-05	Moderately soluble	-4.54	0.0132	2.91e-05	Moderately soluble	-6.71	8.85e-05	1.95e-07	Poorly soluble	High	No	Yes	No	No	No	Yes	Yes	-6.9	0	1	0	0	0	0.55	0	0	2	4.69
ZINC000066252600	Cc1ccc(C[C@H](CNC(C)C)C(=O)N2CCN(c3ncnc4c3[C@H](C)SC4)CC2)cc1	C25H35N5OS	453.64	32	12	0.56	8	4	1	139.8	86.66	4.26	3.05	2.36	2.58	4.19	3.29	-4.32	0.0215	4.75e-05	Moderately soluble	-4.54	0.0132	2.91e-05	Moderately soluble	-6.71	8.85e-05	1.95e-07	Poorly soluble	High	No	Yes	No	No	No	Yes	Yes	-6.9	0	1	0	0	0	0.55	0	0	2	4.69
ZINC000066258790	Cc1ccc(C[C@@H](CNC(C)C)C(=O)N2CCN(c3ncnc4c3[C@H](C)OC4)CC2)cc1	C25H35N5O2	437.58	32	12	0.56	8	5	1	133.3	70.59	4.39	2.25	1.64	1.78	3.63	2.74	-3.72	0.0834	0.000191	Soluble	-3.37	0.187	0.000428	Soluble	-6.36	0.000193	4.41e-07	Poorly soluble	High	Yes	Yes	No	No	No	Yes	Yes	-7.37	0	1	0	0	0	0.55	0	0	2	4.4
ZINC000066258791	Cc1ccc(C[C@H](CNC(C)C)C(=O)N2CCN(c3ncnc4c3[C@H](C)OC4)CC2)cc1	C25H35N5O2	437.58	32	12	0.56	8	5	1	133.3	70.59	4.1	2.25	1.64	1.78	3.63	2.68	-3.72	0.0834	0.000191	Soluble	-3.37	0.187	0.000428	Soluble	-6.36	0.000193	4.41e-07	Poorly soluble	High	Yes	Yes	No	No	No	Yes	Yes	-7.37	0	1	0	0	0	0.55	0	0	2	4.4
ZINC000066258792	CC(C)NC[C@H](Cc1ccc(Cl)c(F)c1)C(=O)N1CCN(c2ncnc3c2[C@H](C)OC3)CC1	C24H31ClFN5O2	475.99	33	12	0.54	8	6	1	133.3	70.59	4.41	2.61	2.55	2.41	4.18	3.23	-4.18	0.0317	6.66e-05	Moderately soluble	-3.74	0.0862	0.000181	Soluble	-6.82	7.14e-05	1.5e-07	Poorly soluble	High	Yes	Yes	No	No	No	Yes	Yes	-7.35	0	1	0	0	0	0.55	0	0	2	4.38
ZINC000066258793	CC(C)NC[C@@H](Cc1ccc(Cl)c(F)c1)C(=O)N1CCN(c2ncnc3c2[C@H](C)OC3)CC1	C24H31ClFN5O2	475.99	33	12	0.54	8	6	1	133.3	70.59	3.91	2.61	2.55	2.41	4.18	3.13	-4.18	0.0317	6.66e-05	Moderately soluble	-3.74	0.0862	0.000181	Soluble	-6.82	7.14e-05	1.5e-07	Poorly soluble	High	Yes	Yes	No	No	No	Yes	Yes	-7.35	0	1	0	0	0	0.55	0	0	2	4.38
ZINC000066258794	CC(C)NC[C@H](Cc1ccc(Cl)cc1)C(=O)N1CCN(c2ncnc3c2[C@H](C)OC3)CC1	C24H32ClN5O2	458	32	12	0.54	8	5	1	133.34	70.59	4.39	2.51	1.99	2.04	3.75	2.94	-4.01	0.0447	9.76e-05	Moderately soluble	-3.64	0.105	0.00023	Soluble	-6.56	0.000125	2.73e-07	Poorly soluble	High	Yes	Yes	No	No	No	Yes	Yes	-7.31	0	1	0	0	0	0.55	0	0	2	4.3
ZINC000066259272	CC(C)NC[C@H](Cc1ccc(Cl)c(F)c1)C(=O)N1CCN(c2ncnc3c2[C@H](C)SC3)CC1	C24H31ClFN5OS	492.05	33	12	0.54	8	5	1	139.81	86.66	4.17	3.41	3.26	3.21	4.74	3.76	-4.78	0.00816	1.66e-05	Moderately soluble	-4.91	0.00606	1.23e-05	Moderately soluble	-7.18	3.27e-05	6.65e-08	Poorly soluble	High	No	Yes	No	No	No	Yes	Yes	-6.88	0	2	0	0	0	0.55	0	0	2	4.64
ZINC000066259273	CC(C)NC[C@@H](Cc1ccc(Cl)c(F)c1)C(=O)N1CCN(c2ncnc3c2[C@H](C)SC3)CC1	C24H31ClFN5OS	492.05	33	12	0.54	8	5	1	139.81	86.66	4.23	3.41	3.26	3.21	4.74	3.77	-4.78	0.00816	1.66e-05	Moderately soluble	-4.91	0.00606	1.23e-05	Moderately soluble	-7.18	3.27e-05	6.65e-08	Poorly soluble	High	No	Yes	No	No	No	Yes	Yes	-6.88	0	2	0	0	0	0.55	0	0	2	4.64
ZINC000066260034	C[C@@H]1SCc2ncnc(N3CCN(C(=O)[C@@H](Cc4ccc(Cl)c(F)c4)CC4(N)CC4)CC3)c21	C24H29ClFN5OS	490.04	33	12	0.54	7	5	1	137.64	100.65	3.6	2.83	3.09	3.21	4.59	3.46	-4.47	0.0167	3.4e-05	Moderately soluble	-4.6	0.0123	2.5e-05	Moderately soluble	-6.76	8.44e-05	1.72e-07	Poorly soluble	High	No	Yes	No	No	No	Yes	Yes	-7.28	0	2	0	0	0	0.55	0	0	1	4.56
ZINC000066260035	C[C@@H]1SCc2ncnc(N3CCN(C(=O)[C@H](Cc4ccc(Cl)c(F)c4)CC4(N)CC4)CC3)c21	C24H29ClFN5OS	490.04	33	12	0.54	7	5	1	137.64	100.65	3.41	2.83	3.09	3.21	4.59	3.43	-4.47	0.0167	3.4e-05	Moderately soluble	-4.6	0.0123	2.5e-05	Moderately soluble	-6.76	8.44e-05	1.72e-07	Poorly soluble	High	No	Yes	No	No	No	Yes	Yes	-7.28	0	2	0	0	0	0.55	0	0	1	4.56
ZINC000066261947	C[C@@H]1OCc2ncnc(N3CCN(C(=O)[C@@H](Cc4ccc(Cl)c(F)c4)CC(C)(C)N)CC3)c21	C24H31ClFN5O2	475.99	33	12	0.54	7	6	1	133.24	84.58	4.01	2.28	2.68	2.41	3.96	3.07	-4.03	0.044	9.23e-05	Moderately soluble	-3.69	0.0964	0.000203	Soluble	-6.41	0.000183	3.85e-07	Poorly soluble	High	No	Yes	No	No	No	Yes	Yes	-7.58	0	1	0	0	0	0.55	0	0	1	4.38
ZINC000066261949	C[C@@H]1OCc2ncnc(N3CCN(C(=O)[C@H](Cc4ccc(Cl)c(F)c4)CC(C)(C)N)CC3)c21	C24H31ClFN5O2	475.99	33	12	0.54	7	6	1	133.24	84.58	3.88	2.28	2.68	2.41	3.96	3.04	-4.03	0.044	9.23e-05	Moderately soluble	-3.69	0.0964	0.000203	Soluble	-6.41	0.000183	3.85e-07	Poorly soluble	High	No	Yes	No	No	No	Yes	Yes	-7.58	0	1	0	0	0	0.55	0	0	1	4.38
ZINC000066262057	N[C@H](Cc1ccc(Cl)cc1)C(=O)N1CCN(c2ncnc3c2CS(=O)(=O)C3)CC1	C19H22ClN5O3S	435.93	29	12	0.42	5	6	1	117.09	117.87	2.47	0.42	0.79	0.84	1.48	1.2	-2.78	0.718	0.00165	Soluble	-2.46	1.5	0.00345	Soluble	-4.98	0.00461	1.06e-05	Moderately soluble	High	No	Yes	No	No	No	No	Yes	-8.66	0	0	0	0	0	0.55	0	0	1	4.01
ZINC000068198003	CC(=O)Nc1nc2ccc(-c3cnc(Cl)c(NS(=O)(=O)c4ccccc4)c3)cc2s1	C20H15ClN4O3S2	458.94	30	21	0.05	6	5	2	119.29	137.67	2.44	3.93	5.47	2.16	3.91	3.58	-5.28	0.00239	5.21e-06	Moderately soluble	-6.52	0.000138	3.02e-07	Poorly soluble	-8.48	1.53e-06	3.33e-09	Poorly soluble	Low	No	No	Yes	Yes	Yes	No	Yes	-6.31	0	0	0	1	0	0.55	0	1	2	3.37
ZINC000068250459	CC(C)NC[C@@H](C(=O)N1CCN(c2ncnc3c2[C@H](C)C[C@H]3O)CC1)c1ccc(Cl)cc1	C24H32ClN5O2	458	32	12	0.54	7	5	2	133.42	81.59	3.67	2.46	2.02	2.04	3.1	2.66	-4.04	0.0413	9.02e-05	Moderately soluble	-3.82	0.0697	0.000152	Soluble	-5.89	0.000587	1.28e-06	Moderately soluble	High	No	Yes	No	No	No	Yes	Yes	-7.35	0	1	0	0	0	0.55	0	0	1	4.55
ZINC000071296222	COc1ccc(S(=O)(=O)Nc2cc(-c3ccc4nc(NC(C)=O)sc4c3)cnc2C)cc1	C22H20N4O4S2	468.55	32	21	0.14	7	6	2	125.74	146.9	2.46	3.34	5.13	1.59	3.86	3.28	-4.87	0.00628	1.34e-05	Moderately soluble	-6.1	0.00037	7.91e-07	Poorly soluble	-8.37	2.01e-06	4.3e-09	Poorly soluble	Low	No	No	No	Yes	Yes	No	Yes	-6.79	0	0	1	1	0	0.55	0	0	1	3.52
ZINC000071296456	CCOCCN(C[C@@H](O)CN1CCC[C@]2(CCN(c3ncncc3C3CC3)C2)C1)S(=O)(=O)c1c(C)cccc1C	C30H45N5O4S	571.77	40	12	0.67	12	8	1	164.14	107.48	3.54	3.52	3.61	1.8	3.45	3.18	-5.03	0.0053	9.28e-06	Moderately soluble	-5.46	0.00198	3.46e-06	Moderately soluble	-7.04	5.17e-05	9.04e-08	Poorly soluble	High	No	Yes	No	No	No	Yes	Yes	-7.29	1	3	1	0	0	0.55	0	0	3	5.77
ZINC000071296471	CCOCCN(C[C@@H](O)CN1CCC[C@]2(CCN(c3ncnc4[nH]nc(C)c34)C2)C1)S(=O)(=O)c1c(C)cccc1C	C29H43N7O4S	585.76	41	15	0.62	11	9	2	166.3	136.16	3.33	2.97	2.98	1.68	2.98	2.79	-4.89	0.00759	1.3e-05	Moderately soluble	-5.49	0.00188	3.22e-06	Moderately soluble	-7.33	2.75e-05	4.7e-08	Poorly soluble	Low	No	Yes	No	No	No	Yes	Yes	-7.76	2	3	1	1	0	0.17	0	0	2	5.73
ZINC000071296478	CCOCCN(C[C@@H](O)CN1CCC[C@]2(CC(=O)c3cc(O)ccc3O2)C1)S(=O)(=O)c1c(C)noc1C	C25H35N3O8S	537.63	37	11	0.6	10	11	2	138.4	151.02	3	1.12	2.59	-0.5	2.07	1.65	-3.44	0.196	0.000364	Soluble	-3.88	0.0701	0.00013	Soluble	-5.51	0.00165	3.07e-06	Moderately soluble	Low	No	Yes	No	No	No	No	Yes	-8.78	2	3	1	1	2	0.17	0	0	2	5.67
ZINC000071296568	CCOCCN(C[C@@H](O)CN1CCCC2(CCN(c3ncnc4[nH]cc(C)c34)CC2)C1)S(=O)(=O)c1c(C)cccc1C	C31H46N6O4S	598.8	42	15	0.61	11	8	2	173.31	123.27	4.41	3.79	3.97	2.01	3.79	3.59	-5.48	0.00199	3.32e-06	Moderately soluble	-6.07	0.000506	8.46e-07	Poorly soluble	-7.96	6.54e-06	1.09e-08	Poorly soluble	High	No	Yes	No	No	No	Yes	Yes	-7.26	1	3	1	0	0	0.55	0	0	3	5.79
ZINC000071296694	CC(=O)Nc1nc2ccc(-c3ccnc(NS(=O)(=O)c4ccccc4F)n3)cc2s1	C19H14FN5O3S2	443.47	30	21	0.05	6	7	2	112.03	150.56	1.92	2.79	4.77	1.44	3.14	2.81	-4.47	0.0151	3.39e-05	Moderately soluble	-5.61	0.00109	2.47e-06	Moderately soluble	-7.79	7.28e-06	1.64e-08	Poorly soluble	Low	No	No	No	Yes	Yes	No	Yes	-7.02	0	0	1	1	1	0.55	0	0	1	3.22
ZINC000071315974	Cc1noc(C)c1S(=O)(=O)N(CCOC(C)C)C[C@@H](O)CN1CCC[C@]2(CC(=O)c3cc(O)ccc3O2)C1	C26H37N3O8S	551.65	38	11	0.62	10	11	2	143.21	151.02	3.79	1.56	2.97	-0.29	2.3	2.07	-3.8	0.088	0.000159	Soluble	-4.34	0.0251	4.56e-05	Moderately soluble	-5.53	0.00164	2.97e-06	Moderately soluble	Low	No	Yes	No	No	No	No	Yes	-8.56	2	3	1	1	2	0.17	0	0	2	5.79
ZINC000071316139	COc1ccc(S(=O)(=O)Nc2cccc(-c3ccc4nc(NC(C)=O)sc4c3)c2)cc1	C22H19N3O4S2	453.53	31	21	0.09	7	5	2	122.97	134.01	2.47	4.01	5.43	2.38	3.9	3.64	-5.22	0.00275	6.06e-06	Moderately soluble	-6.53	0.000135	2.97e-07	Poorly soluble	-8.37	1.94e-06	4.29e-09	Poorly soluble	Low	No	No	No	Yes	Yes	No	Yes	-6.22	0	0	0	1	0	0.55	0	0	2	3.3
ZINC000071316291	CCOCCN(C[C@@H](O)CN1CC[C@]2(CCN(c3ncnc4[nH]nc(C)c34)C2)C1)S(=O)(=O)c1c(C)cccc1C	C28H41N7O4S	571.73	40	15	0.61	11	9	2	161.49	136.16	3.69	2.61	2.59	1.48	2.74	2.62	-4.58	0.015	2.63e-05	Moderately soluble	-5.12	0.00435	7.6e-06	Moderately soluble	-7.07	4.9e-05	8.57e-08	Poorly soluble	High	No	Yes	No	No	No	Yes	Yes	-7.93	2	3	1	1	0	0.17	0	0	2	5.61
ZINC000071316300	CCOCCN(C[C@@H](O)CN1CCC[C@]2(CC(=O)c3cc(O)ccc3O2)C1)S(=O)(=O)c1ccccc1C(F)(F)F	C27H33F3N2O7S	586.62	40	12	0.52	11	12	2	143.41	124.99	3.74	2.76	5.15	1.16	3.31	3.22	-4.71	0.0114	1.94e-05	Moderately soluble	-5.04	0.00535	9.12e-06	Moderately soluble	-6.72	0.000111	1.9e-07	Poorly soluble	Low	No	Yes	No	No	No	Yes	Yes	-7.92	1	3	1	0	1	0.55	0	0	2	5.47
ZINC000071316447	CC(=O)Nc1nc2ccc(-c3ccnc(N(C)S(=O)(=O)c4ccccc4F)n3)cc2s1	C20H16FN5O3S2	457.5	31	21	0.1	6	7	1	116.93	141.77	2.33	2.97	4.99	1.67	3.08	3.01	-4.65	0.0102	2.22e-05	Moderately soluble	-5.61	0.00112	2.45e-06	Moderately soluble	-7.44	1.65e-05	3.61e-08	Poorly soluble	Low	No	No	No	Yes	Yes	No	Yes	-6.98	0	0	1	1	0	0.55	0	0	1	3.33
ZINC000071316486	COc1ccc(S(=O)(=O)Nc2nccc(-c3ccc4nc(NC(C)=O)sc4c3)n2)cc1	C20H17N5O4S2	455.51	31	21	0.1	7	7	2	118.56	159.79	2.16	2.66	4.22	1.18	2.77	2.6	-4.38	0.019	4.18e-05	Moderately soluble	-5.67	0.00098	2.15e-06	Moderately soluble	-7.62	1.09e-05	2.39e-08	Poorly soluble	Low	No	No	No	Yes	Yes	No	Yes	-7.19	0	0	1	1	1	0.55	0	0	1	3.29
ZINC000071316648	Cc1cccc(C)c1S(=O)(=O)N1CCC[C@H]1[C@H](O)CN1CCC[C@@]2(CCN(c3ncnc(N)c3C3CC3)C2)C1	C29H42N6O3S	554.75	39	12	0.66	7	7	2	164.46	124.27	3.88	3.5	2.94	2.28	2.27	2.97	-5.25	0.00312	5.62e-06	Moderately soluble	-5.79	0.000894	1.61e-06	Moderately soluble	-5.84	0.000804	1.45e-06	Moderately soluble	High	No	Yes	No	No	No	Yes	Yes	-7.2	1	3	0	0	0	0.55	0	0	1	5.82
ZINC000071316698	CCOCCN(C[C@@H](O)CN1CCC[C@]2(CCc3cc(F)ccc3O2)C1)S(=O)(=O)c1c(C)cccc1C	C28H39FN2O5S	534.68	37	12	0.57	10	8	1	145.85	87.69	4.54	3.97	4.81	2.53	4.46	4.06	-5.24	0.0031	5.81e-06	Moderately soluble	-5.51	0.00164	3.07e-06	Moderately soluble	-7.64	1.22e-05	2.29e-08	Poorly soluble	High	No	Yes	No	No	No	Yes	Yes	-6.74	1	3	0	0	0	0.55	0	0	3	5.58
ZINC000071316730	CCOCCN(C[C@@H](O)CN1CCC[C@]2(CCc3cc(O)ccc3O2)C1)S(=O)(=O)c1c(C)cccc1C	C28H40N2O6S	532.69	37	12	0.57	10	8	2	147.92	107.92	3.9	3.51	3.96	1.64	3.56	3.31	-4.93	0.0062	1.16e-05	Moderately soluble	-5.46	0.00185	3.47e-06	Moderately soluble	-6.79	8.66e-05	1.63e-07	Poorly soluble	High	No	Yes	No	No	No	Yes	Yes	-7.06	1	3	0	0	0	0.55	0	0	3	5.57
ZINC000071316731	COCCN(C[C@H](O)CN1CCC[C@]2(CC(=O)c3cc(O)ccc3O2)C1)S(=O)(=O)c1c(C)noc1C	C24H33N3O8S	523.6	36	11	0.58	9	11	2	133.59	151.02	3.46	0.76	2.2	-0.7	1.66	1.47	-3.2	0.332	0.000635	Soluble	-3.51	0.161	0.000308	Soluble	-5.12	0.00393	7.5e-06	Moderately soluble	Low	No	Yes	No	No	No	No	No	-8.95	2	2	1	1	2	0.17	0	0	2	5.55
ZINC000071316732	COCCN(C[C@@H](O)CN1CCC[C@]2(CC(=O)c3cc(O)ccc3O2)C1)S(=O)(=O)c1c(C)noc1C	C24H33N3O8S	523.6	36	11	0.58	9	11	2	133.59	151.02	3.09	0.76	2.2	-0.7	1.66	1.4	-3.2	0.332	0.000635	Soluble	-3.51	0.161	0.000308	Soluble	-5.12	0.00393	7.5e-06	Moderately soluble	Low	No	Yes	No	No	No	No	No	-8.95	2	2	1	1	2	0.17	0	0	2	5.55
ZINC000071316825	COc1ccc(S(=O)(=O)Nc2cncc(-c3ccc4nc(NC(C)=O)sc4c3)n2)cc1	C20H17N5O4S2	455.51	31	21	0.1	7	7	2	118.56	159.79	1.71	2.24	4.22	0.78	2.77	2.34	-4.11	0.035	7.68e-05	Moderately soluble	-5.23	0.00267	5.87e-06	Moderately soluble	-7.62	1.09e-05	2.39e-08	Poorly soluble	Low	No	No	No	Yes	Yes	No	Yes	-7.49	0	0	1	1	1	0.55	0	0	1	3.48
ZINC000071316981	Cc1ccncc1S(=O)(=O)NC[C@@H](O)CN1CCC[C@@]2(CCN(c3ncnc(N)c3C3CC3)C2)C1	C24H35N7O3S	501.64	35	12	0.62	8	8	3	140.97	145.95	2.94	1.33	1.54	0.5	0.91	1.44	-3.51	0.154	0.000306	Soluble	-4	0.0506	0.000101	Soluble	-5.38	0.00207	4.13e-06	Moderately soluble	Low	No	Yes	No	No	No	Yes	Yes	-8.42	1	2	1	1	0	0.55	0	0	2	5.31
ZINC000071317050	Nc1ncnc(N2CC[C@@]3(CCCN(C[C@H](O)CNS(=O)(=O)c4ccccc4F)C3)C2)c1C1CC1	C24H33FN6O3S	504.62	35	12	0.58	8	8	3	138.17	133.06	2.52	2.14	2.39	1.64	1.38	2.01	-4.04	0.0458	9.07e-05	Moderately soluble	-4.57	0.0137	2.72e-05	Moderately soluble	-5.64	0.00114	2.26e-06	Moderately soluble	High	No	Yes	No	No	No	Yes	Yes	-7.86	1	2	0	1	0	0.55	0	0	2	5.15
ZINC000071317064	CCOCCN(C[C@@H](O)CN1CCC[C@]2(CCN(c3ncnc4ccccc34)C2)C1)S(=O)(=O)c1c(C)cccc1C	C31H43N5O4S	581.77	41	16	0.55	11	8	1	169.18	107.48	4.28	3.94	3.95	2.34	3.51	3.6	-5.49	0.00187	3.22e-06	Moderately soluble	-5.9	0.000738	1.27e-06	Moderately soluble	-8.11	4.54e-06	7.8e-09	Poorly soluble	High	No	Yes	No	No	No	Yes	Yes	-7.05	1	3	1	0	0	0.55	0	0	3	5.61
ZINC000071317125	CC(=O)Nc1nc2ccc(-c3cnc(Cl)c(NS(=O)(=O)c4ccccc4C(F)(F)F)c3)cc2s1	C21H14ClF3N4O3S2	526.94	34	21	0.1	7	8	2	124.29	137.67	2.69	4.81	7.64	2.7	5.01	4.57	-6.13	0.000388	7.37e-07	Poorly soluble	-7.43	1.94e-05	3.68e-08	Poorly soluble	-9.29	2.71e-07	5.14e-10	Poorly soluble	Low	No	No	No	Yes	Yes	No	Yes	-6.1	1	2	0	2	0	0.55	0	1	2	3.5
ZINC000071317384	Cc1noc(C)c1S(=O)(=O)N(Cc1ccccc1)C[C@H](O)CN1CCC[C@]2(CC(=O)c3cc(O)ccc3O2)C1	C28H33N3O7S	555.64	39	17	0.43	8	10	2	147.38	141.79	2.77	2.4	3.6	0.65	2.74	2.43	-4.59	0.0142	2.56e-05	Moderately soluble	-5.02	0.00532	9.57e-06	Moderately soluble	-7.07	4.73e-05	8.51e-08	Poorly soluble	Low	No	Yes	No	No	No	Yes	Yes	-7.99	1	3	1	1	0	0.55	0	0	2	5.62
ZINC000071317385	Cc1noc(C)c1S(=O)(=O)N(Cc1ccccc1)C[C@@H](O)CN1CCC[C@]2(CC(=O)c3cc(O)ccc3O2)C1	C28H33N3O7S	555.64	39	17	0.43	8	10	2	147.38	141.79	3.34	2.4	3.6	0.65	2.74	2.55	-4.59	0.0142	2.56e-05	Moderately soluble	-5.02	0.00532	9.57e-06	Moderately soluble	-7.07	4.73e-05	8.51e-08	Poorly soluble	Low	No	Yes	No	No	No	Yes	Yes	-7.99	1	3	1	1	0	0.55	0	0	2	5.62
ZINC000071317398	CCOCCN(C[C@@H](O)CN1CCC[C@]2(CCN(c3ncnc4[nH]cc(C)c34)C2)C1)S(=O)(=O)c1c(C)cccc1C	C30H44N6O4S	584.77	41	15	0.6	11	8	2	168.5	123.27	3.77	3.43	3.58	1.82	3.55	3.23	-5.17	0.00394	6.74e-06	Moderately soluble	-5.7	0.00117	2e-06	Moderately soluble	-7.7	1.16e-05	1.99e-08	Poorly soluble	High	No	Yes	No	No	No	Yes	Yes	-7.43	1	3	1	0	0	0.55	0	0	2	5.69
ZINC000071317399	Cc1cccc(C)c1S(=O)(=O)NC[C@@H](O)CN1CCC[C@@]2(CCN(c3ncnc(N)c3C3CC3)C2)C1	C26H38N6O3S	514.68	36	12	0.62	8	7	3	148.14	133.06	1.56	2.77	2.45	1.68	2.01	2.1	-4.49	0.0165	3.2e-05	Moderately soluble	-5.22	0.0031	6.03e-06	Moderately soluble	-6.13	0.000382	7.43e-07	Poorly soluble	High	No	Yes	No	No	No	Yes	Yes	-7.47	1	3	0	1	0	0.55	0	0	2	5.34
ZINC000071317452	CCOCCN(C[C@@H](O)CN1CCC[C@]2(CCc3cc(C#N)ccc3O2)C1)S(=O)(=O)c1c(C)cccc1C	C29H39N3O5S	541.7	38	12	0.55	10	8	1	150.61	111.48	4.03	3.59	4.12	1.5	4.1	3.47	-5.03	0.00501	9.25e-06	Moderately soluble	-5.62	0.00131	2.41e-06	Moderately soluble	-7.44	1.97e-05	3.64e-08	Poorly soluble	High	No	Yes	No	No	No	Yes	Yes	-7.06	1	3	0	0	0	0.55	0	0	3	5.59
ZINC000071317488	CC(=O)Nc1nc2ccc(-c3ccnc(NS(=O)(=O)c4ccc(C)cc4)n3)cc2s1	C20H17N5O3S2	439.51	30	21	0.1	6	6	2	117.04	150.56	1.6	3.05	4.52	1.29	3.23	2.74	-4.61	0.0108	2.46e-05	Moderately soluble	-5.88	0.000582	1.32e-06	Moderately soluble	-7.9	5.57e-06	1.27e-08	Poorly soluble	Low	No	No	No	Yes	Yes	No	Yes	-6.82	0	0	1	1	1	0.55	0	0	1	3.31
ZINC000071317495	COc1ccc(S(=O)(=O)Nc2cc(-c3ccc4nc(NC(C)=O)sc4c3)ccn2)cc1	C21H18N4O4S2	454.52	31	21	0.1	7	6	2	120.77	146.9	1.71	3.27	4.83	1.78	3.33	2.98	-4.76	0.00795	1.75e-05	Moderately soluble	-6.03	0.000425	9.35e-07	Poorly soluble	-8	4.6e-06	1.01e-08	Poorly soluble	Low	No	No	No	Yes	Yes	No	Yes	-6.75	0	0	1	1	0	0.55	0	0	1	3.38
ZINC000071317736	CCOCCN(C[C@@H](O)CN1CCC[C@]2(CCc3c(ccc4[nH]ncc34)O2)C1)S(=O)(=O)c1c(C)cccc1C	C29H40N4O5S	556.72	39	15	0.55	10	8	2	155.55	116.37	3.47	3.5	4.13	1.72	4	3.36	-5.12	0.00421	7.56e-06	Moderately soluble	-5.63	0.00131	2.36e-06	Moderately soluble	-7.85	7.9e-06	1.42e-08	Poorly soluble	High	No	Yes	No	No	No	Yes	Yes	-7.21	1	3	0	0	0	0.55	0	0	2	5.65
ZINC000071317814	CCOCCN(C[C@@H](O)CN1CCC[C@]2(CCc3cc(C(N)=O)ccc3O2)C1)S(=O)(=O)c1c(C)cccc1C	C29H41N3O6S	559.72	39	12	0.55	11	8	2	153.99	130.78	3.69	2.74	3.35	1.39	3.29	2.89	-4.54	0.0162	2.9e-05	Moderately soluble	-5.14	0.00405	7.23e-06	Moderately soluble	-6.92	6.73e-05	1.2e-07	Poorly soluble	High	No	Yes	No	No	No	Yes	Yes	-7.77	1	3	1	0	0	0.55	0	0	2	5.61
ZINC000071317898	COc1ccc(S(=O)(=O)N(C)c2nccc(-c3ccc4nc(NC(C)=O)sc4c3)n2)cc1	C21H19N5O4S2	469.54	32	21	0.14	7	7	1	123.47	151	2.81	2.84	4.44	1.41	2.72	2.84	-4.56	0.0128	2.73e-05	Moderately soluble	-5.67	0.00101	2.14e-06	Moderately soluble	-7.28	2.47e-05	5.26e-08	Poorly soluble	Low	No	No	No	Yes	Yes	No	Yes	-7.15	0	0	1	1	1	0.55	0	0	1	3.41
ZINC000071317918	CC(=O)Nc1nc2ccc(-c3cnc(Cl)c(NS(=O)(=O)c4cccc(C(F)(F)F)c4)c3)cc2s1	C21H14ClF3N4O3S2	526.94	34	21	0.1	7	8	2	124.29	137.67	2.78	4.81	7.64	2.7	5.01	4.59	-6.13	0.000388	7.37e-07	Poorly soluble	-7.43	1.94e-05	3.68e-08	Poorly soluble	-9.29	2.71e-07	5.14e-10	Poorly soluble	Low	No	No	No	Yes	Yes	No	Yes	-6.1	1	2	0	2	0	0.55	0	1	2	3.49
ZINC000071317928	CC(=O)Nc1nc2ccc(-c3cnc(Cl)c(NS(=O)(=O)c4ccccc4Cl)c3)cc2s1	C20H14Cl2N4O3S2	493.39	31	21	0.05	6	5	2	124.3	137.67	2.56	4.56	6.12	2.65	4.56	4.09	-5.88	0.000655	1.33e-06	Moderately soluble	-7.17	3.3e-05	6.7e-08	Poorly soluble	-9.06	4.33e-07	8.77e-10	Poorly soluble	Low	No	No	No	Yes	Yes	No	Yes	-6.07	0	2	0	2	0	0.55	0	1	2	3.36
ZINC000071317943	CC(=O)Nc1nc2ccc(-c3cnc(Cl)c(NS(=O)(=O)c4ccc(C(F)(F)F)cc4)c3)cc2s1	C21H14ClF3N4O3S2	526.94	34	21	0.1	7	8	2	124.29	137.67	2.5	4.81	7.64	2.7	5.01	4.53	-6.13	0.000388	7.37e-07	Poorly soluble	-7.43	1.94e-05	3.68e-08	Poorly soluble	-9.29	2.71e-07	5.14e-10	Poorly soluble	Low	No	No	No	Yes	Yes	No	Yes	-6.1	1	2	0	2	0	0.55	0	1	2	3.48
ZINC000071318130	Cc1cccc(C)c1S(=O)(=O)N1CCC[C@H]1[C@@H](O)CN1CCC[C@@]2(CCN(c3ncnc(N)c3C3CC3)C2)C1	C29H42N6O3S	554.75	39	12	0.66	7	7	2	164.46	124.27	4	3.5	2.94	2.28	2.27	3	-5.25	0.00312	5.62e-06	Moderately soluble	-5.79	0.000894	1.61e-06	Moderately soluble	-5.84	0.000804	1.45e-06	Moderately soluble	High	No	Yes	No	No	No	Yes	Yes	-7.2	1	3	0	0	0	0.55	0	0	1	5.82
ZINC000071318168	Nc1ncnc(N2CC[C@@]3(CCCN(C[C@H](O)CNS(=O)(=O)c4ccccc4Cl)C3)C2)c1C1CC1	C24H33ClN6O3S	521.08	35	12	0.58	8	7	3	143.22	133.06	2.63	2.66	2.49	1.75	1.6	2.22	-4.47	0.0176	3.37e-05	Moderately soluble	-5.11	0.00408	7.84e-06	Moderately soluble	-5.96	0.000567	1.09e-06	Moderately soluble	High	No	Yes	No	No	No	Yes	Yes	-7.59	1	2	0	1	0	0.55	0	0	2	5.11
ZINC000071318171	Cc1noc(C)c1S(=O)(=O)NC[C@@H](O)CN1CCC[C@@]2(CCN(c3ncnc(N)c3C3CC3)C2)C1	C23H35N7O4S	505.63	35	11	0.7	8	9	3	138.2	159.09	2.93	1.28	1.44	0.38	0.83	1.37	-3.49	0.165	0.000327	Soluble	-4.22	0.0304	6.02e-05	Moderately soluble	-4.98	0.00528	1.04e-05	Moderately soluble	Low	No	Yes	No	No	No	Yes	Yes	-8.48	2	2	1	1	1	0.17	0	0	2	5.63
ZINC000071318235	CC(=O)Nc1nc2ccc(-c3cnc(Cl)c(NS(=O)(=O)c4ccc(C(C)(C)C)cc4)c3)cc2s1	C24H23ClN4O3S2	515.05	34	21	0.21	7	5	2	138.56	137.67	3.2	5.6	6.77	3.01	5.3	4.78	-6.56	0.000143	2.78e-07	Poorly soluble	-8.25	2.87e-06	5.58e-09	Poorly soluble	-9.63	1.22e-07	2.36e-10	Poorly soluble	Low	No	No	No	Yes	Yes	No	Yes	-5.47	1	3	0	2	1	0.55	0	1	2	3.8
ZINC000071318274	CC(=O)Nc1nc2ccc(-c3cnc(Cl)c(NS(=O)(=O)c4ccc(Cl)cc4)c3)cc2s1	C20H14Cl2N4O3S2	493.39	31	21	0.05	6	5	2	124.3	137.67	2.64	4.56	6.12	2.65	4.56	4.11	-5.88	0.000655	1.33e-06	Moderately soluble	-7.17	3.3e-05	6.7e-08	Poorly soluble	-9.06	4.33e-07	8.77e-10	Poorly soluble	Low	No	No	No	Yes	Yes	No	Yes	-6.07	0	2	0	2	0	0.55	0	1	2	3.39
ZINC000071318537	Nc1ncnc(N2CC[C@@]3(CCCN(C[C@H](O)CNS(=O)(=O)c4ccccc4Br)C3)C2)c1C1CC1	C24H33BrN6O3S	565.53	35	12	0.58	8	7	3	145.91	133.06	2.83	2.73	2.59	1.85	1.63	2.33	-4.79	0.00913	1.61e-05	Moderately soluble	-5.18	0.00375	6.63e-06	Moderately soluble	-6.14	0.000406	7.18e-07	Poorly soluble	High	No	Yes	No	Yes	No	Yes	Yes	-7.81	1	2	0	1	0	0.55	0	0	2	5.2
ZINC000071318639	CC(=O)Nc1nc2ccc(-c3cnc(Cl)c(NS(=O)(=O)c4cccc(C(C)(C)C)c4)c3)cc2s1	C24H23ClN4O3S2	515.05	34	21	0.21	7	5	2	138.56	137.67	3.24	5.6	6.77	3.01	5.3	4.78	-6.56	0.000143	2.78e-07	Poorly soluble	-8.25	2.87e-06	5.58e-09	Poorly soluble	-9.63	1.22e-07	2.36e-10	Poorly soluble	Low	No	No	No	Yes	Yes	No	Yes	-5.47	1	3	0	2	1	0.55	0	1	2	3.82
ZINC000071318677	COc1ccc(S(=O)(=O)Nc2cncc(-c3ccc4nc(NC(C)=O)sc4c3)c2)cc1	C21H18N4O4S2	454.52	31	21	0.1	7	6	2	120.77	146.9	1.81	2.94	4.83	1.37	3.33	2.86	-4.55	0.0128	2.82e-05	Moderately soluble	-5.69	0.000935	2.06e-06	Moderately soluble	-8	4.6e-06	1.01e-08	Poorly soluble	Low	No	No	No	Yes	Yes	No	Yes	-6.99	0	0	1	1	0	0.55	0	0	1	3.37
ZINC000071318999	CCN(c1nccc(-c2ccc3nc(NC(C)=O)sc3c2)n1)S(=O)(=O)c1ccc(OC)cc1	C22H21N5O4S2	483.56	33	21	0.18	8	7	1	128.27	151	2.85	3.21	4.83	1.22	3.12	3.04	-4.8	0.00761	1.57e-05	Moderately soluble	-6.05	0.000428	8.85e-07	Poorly soluble	-7.67	1.04e-05	2.15e-08	Poorly soluble	Low	No	No	No	Yes	Yes	No	Yes	-6.97	0	1	1	1	1	0.55	0	0	2	3.53
ZINC000071319232	Cc1ccc(S(=O)(=O)NC[C@@H](O)CN2CCC[C@@]3(CCN(c4ncnc(N)c4C4CC4)C3)C2)c(C)c1	C26H38N6O3S	514.68	36	12	0.62	8	7	3	148.14	133.06	3.08	2.77	2.45	1.68	2.01	2.4	-4.49	0.0165	3.2e-05	Moderately soluble	-5.22	0.0031	6.03e-06	Moderately soluble	-6.13	0.000382	7.43e-07	Poorly soluble	High	No	Yes	No	No	No	Yes	Yes	-7.47	1	3	0	1	0	0.55	0	0	2	5.35
ZINC000071329262	CCOCCN(C[C@@H](O)CN1CCC[C@]2(CC(=O)c3cc(O)ccc3O2)C1)S(=O)(=O)c1c(C)cccc1C	C28H38N2O7S	546.68	38	12	0.54	10	9	2	148.34	124.99	3.53	2.61	3.6	0.79	3.26	2.76	-4.45	0.0195	3.57e-05	Moderately soluble	-4.88	0.00713	1.31e-05	Moderately soluble	-6.66	0.00012	2.19e-07	Poorly soluble	High	No	Yes	No	No	No	Yes	Yes	-7.78	1	3	0	0	0	0.55	0	0	2	5.56
ZINC000071329318	Cc1ccccc1S(=O)(=O)NC[C@@H](O)CN1CCC[C@@]2(CCN(c3ncnc(N)c3C3CC3)C2)C1	C25H36N6O3S	500.66	35	12	0.6	8	7	3	143.17	133.06	3.22	2.4	2.14	1.48	1.48	2.14	-4.18	0.0329	6.58e-05	Moderately soluble	-4.84	0.0073	1.46e-05	Moderately soluble	-5.76	0.000874	1.75e-06	Moderately soluble	High	No	Yes	No	No	No	Yes	Yes	-7.65	1	3	0	1	0	0.55	0	0	2	5.21
ZINC000071329383	CC(=O)Nc1nc2ccc(-c3ccnc(N(C)S(=O)(=O)c4ccc(C)cc4)n3)cc2s1	C21H19N5O3S2	453.54	31	21	0.14	6	6	1	121.94	141.77	2.78	3.24	4.74	1.51	3.18	3.09	-4.8	0.00721	1.59e-05	Moderately soluble	-5.89	0.000584	1.29e-06	Moderately soluble	-7.55	1.26e-05	2.79e-08	Poorly soluble	Low	No	No	No	Yes	Yes	No	Yes	-6.77	0	0	1	1	0	0.55	0	0	1	3.43
ZINC000071329542	CCOCCN(C[C@@H](O)CN1CCC[C@]2(CCN(c3ncnc(N)c3C3CC3)C2)C1)S(=O)(=O)c1c(C)cccc1C	C30H46N6O4S	586.79	41	12	0.67	12	8	2	168.55	133.5	3.86	3.17	3.2	1.7	2.74	2.93	-4.9	0.00739	1.26e-05	Moderately soluble	-5.64	0.00133	2.27e-06	Moderately soluble	-6.67	0.000127	2.16e-07	Poorly soluble	High	No	Yes	No	No	No	No	Yes	-7.63	1	3	1	1	0	0.55	0	0	2	5.91
ZINC000071329548	CCOCCN(C[C@@H](O)CN1CCC[C@]2(CC(=O)c3cc(O)ccc3O2)C1)S(=O)(=O)c1ccccc1Cl	C26H33ClN2O7S	553.07	37	12	0.5	10	9	2	143.42	124.99	3.7	2.5	3.63	0.86	2.84	2.71	-4.42	0.0208	3.77e-05	Moderately soluble	-4.77	0.00939	1.7e-05	Moderately soluble	-6.49	0.000177	3.21e-07	Poorly soluble	High	No	Yes	No	No	No	Yes	Yes	-7.9	1	2	0	0	0	0.55	0	0	2	5.29
ZINC000071329551	Cc1cccc(C)c1S(=O)(=O)N1CCC[C@@H]1[C@@H](O)CN1CCC[C@@]2(CCN(c3ncnc(N)c3C3CC3)C2)C1	C29H42N6O3S	554.75	39	12	0.66	7	7	2	164.46	124.27	1.82	3.5	2.94	2.28	2.27	2.56	-5.25	0.00312	5.62e-06	Moderately soluble	-5.79	0.000894	1.61e-06	Moderately soluble	-5.84	0.000804	1.45e-06	Moderately soluble	High	No	Yes	No	No	No	Yes	Yes	-7.2	1	3	0	0	0	0.55	0	0	1	5.82
ZINC000071329626	Cc1cc(F)ccc1S(=O)(=O)NC[C@@H](O)CN1CCC[C@@]2(CCN(c3ncnc(N)c3C3CC3)C2)C1	C25H35FN6O3S	518.65	36	12	0.6	8	8	3	143.13	133.06	3.23	2.5	2.7	1.85	1.91	2.44	-4.35	0.0232	4.47e-05	Moderately soluble	-4.94	0.00596	1.15e-05	Moderately soluble	-6.02	0.0005	9.64e-07	Poorly soluble	High	No	Yes	No	No	No	Yes	Yes	-7.69	1	3	0	1	0	0.55	0	0	2	5.25
ZINC000071329669	CCOCCN(C[C@@H](O)CN1CCC[C@]2(CC(=O)c3cc(O)ccc3O2)C1)S(=O)(=O)c1ccccc1C#N	C27H33N3O7S	543.63	38	12	0.48	10	10	2	143.12	148.78	3.02	1.59	2.85	-0.25	2.25	1.89	-3.79	0.089	0.000164	Soluble	-4.33	0.0257	4.73e-05	Moderately soluble	-5.98	0.000575	1.06e-06	Moderately soluble	Low	No	Yes	No	No	No	No	Yes	-8.49	1	3	1	1	0	0.55	0	0	2	5.42
ZINC000071329702	CC(=O)Nc1nc2ccc(-c3cnc(Cl)c(NS(=O)(=O)c4cccc(F)c4)c3)cc2s1	C20H14ClFN4O3S2	476.93	31	21	0.05	6	6	2	119.25	137.67	2.47	4.03	6.03	2.54	4.34	3.88	-5.44	0.00173	3.62e-06	Moderately soluble	-6.62	0.000113	2.38e-07	Poorly soluble	-8.74	8.7e-07	1.82e-09	Poorly soluble	Low	No	No	No	Yes	Yes	No	Yes	-6.35	0	1	0	2	0	0.55	0	1	2	3.37
ZINC000071329706	CC(=O)Nc1nc2ccc(-c3cnc(Cl)c(NS(=O)(=O)c4cccc(Cl)c4)c3)cc2s1	C20H14Cl2N4O3S2	493.39	31	21	0.05	6	5	2	124.3	137.67	2.65	4.56	6.12	2.65	4.56	4.11	-5.88	0.000655	1.33e-06	Moderately soluble	-7.17	3.3e-05	6.7e-08	Poorly soluble	-9.06	4.33e-07	8.77e-10	Poorly soluble	Low	No	No	No	Yes	Yes	No	Yes	-6.07	0	2	0	2	0	0.55	0	1	2	3.42
ZINC000071330046	CCOCCN(C[C@@H](O)CN1CCC[C@]2(CC(=O)c3cc(O)ccc3O2)C1)S(=O)(=O)c1ccccc1F	C26H33FN2O7S	536.61	37	12	0.5	10	10	2	138.37	124.99	2.95	1.98	3.54	0.76	2.62	2.37	-3.99	0.0544	0.000101	Soluble	-4.23	0.0316	5.88e-05	Moderately soluble	-6.18	0.000356	6.64e-07	Poorly soluble	High	No	Yes	No	No	No	Yes	Yes	-8.17	1	2	0	0	0	0.55	0	0	2	5.33
ZINC000071330059	Cc1noc(C)c1S(=O)(=O)N(C[C@@H](O)CN1CCC[C@]2(CC(=O)c3cc(O)ccc3O2)C1)C1CCCCC1	C27H37N3O7S	547.66	38	11	0.63	7	10	2	144.82	141.79	3.8	2.71	3.88	0.67	2.44	2.7	-4.7	0.0111	2.02e-05	Moderately soluble	-5.34	0.0025	4.56e-06	Moderately soluble	-5.59	0.00139	2.54e-06	Moderately soluble	Low	No	Yes	No	No	No	Yes	Yes	-7.72	1	3	1	1	0	0.55	0	0	1	5.78
ZINC000071330068	CCCCCN(C[C@@H](O)CN1CCC[C@]2(CC(=O)c3cc(O)ccc3O2)C1)S(=O)(=O)c1c(C)noc1C	C26H37N3O7S	535.65	37	11	0.62	10	10	2	142.12	141.79	3.22	2.7	3.74	0.47	2.92	2.61	-4.42	0.0203	3.78e-05	Moderately soluble	-5.33	0.0025	4.67e-06	Moderately soluble	-6.18	0.000354	6.61e-07	Poorly soluble	Low	No	Yes	No	No	No	No	Yes	-7.65	1	3	1	1	0	0.55	0	0	2	5.74
ZINC000071330105	CC(=O)Nc1nc2ccc(-c3cnc(Cl)c(NS(=O)(=O)c4ccccc4F)c3)cc2s1	C20H14ClFN4O3S2	476.93	31	21	0.05	6	6	2	119.25	137.67	2.24	4.03	6.03	2.54	4.34	3.84	-5.44	0.00173	3.62e-06	Moderately soluble	-6.62	0.000113	2.38e-07	Poorly soluble	-8.74	8.7e-07	1.82e-09	Poorly soluble	Low	No	No	No	Yes	Yes	No	Yes	-6.35	0	1	0	2	0	0.55	0	1	2	3.39
ZINC000071330139	CC(=O)Nc1nc2ccc(-c3ccnc(NC(C)(C)c4ccccc4)n3)cc2s1	C22H21N5OS	403.5	29	21	0.18	6	4	2	118.25	108.04	2.96	4.23	4.57	2.78	4.71	3.85	-5.15	0.00288	7.14e-06	Moderately soluble	-6.21	0.000249	6.17e-07	Poorly soluble	-8.44	1.47e-06	3.63e-09	Poorly soluble	High	No	Yes	Yes	Yes	Yes	Yes	Yes	-5.76	0	0	0	0	0	0.55	0	0	2	3.17
ZINC000071330243	COc1ccc(S(=O)(=O)Nc2cc(-c3ccc4nc(NC(C)=O)sc4c3)cnc2C#N)cc1	C22H17N5O4S2	479.53	33	21	0.09	7	7	2	125.48	170.69	2.14	3.54	4.7	0.74	3.39	2.9	-5.05	0.00425	8.87e-06	Moderately soluble	-6.81	7.44e-05	1.55e-07	Poorly soluble	-8.05	4.22e-06	8.81e-09	Poorly soluble	Low	No	No	No	Yes	Yes	No	Yes	-6.71	0	0	1	1	1	0.55	0	0	2	3.58
ZINC000071330803	CCOCCN(C[C@@H](O)CN1CCC[C@]2(CCc3cc4c(cc3O2)CNC4=O)C1)S(=O)(=O)c1c(C)cccc1C	C30H41N3O6S	571.73	40	12	0.57	10	8	2	160.85	116.79	3.21	2.72	2.96	1.58	3.91	2.88	-4.66	0.0125	2.19e-05	Moderately soluble	-4.83	0.00853	1.49e-05	Moderately soluble	-7.81	8.94e-06	1.56e-08	Poorly soluble	High	No	Yes	No	No	No	Yes	Yes	-7.86	1	3	0	0	0	0.55	0	0	2	5.66
ZINC000071330968	CCOCCN(C[C@@H](O)CN1CCC[C@]2(CCc3cc(O)ccc3O2)C1)S(=O)(=O)c1c(C)noc1C	C25H37N3O7S	523.64	36	11	0.64	10	10	2	137.98	133.95	3.07	2.03	2.94	0.34	2.36	2.15	-3.93	0.0613	0.000117	Soluble	-4.47	0.0177	3.38e-05	Moderately soluble	-5.64	0.0012	2.29e-06	Moderately soluble	High	No	Yes	No	No	No	Yes	Yes	-8.05	1	3	0	1	0	0.55	0	0	2	5.71
ZINC000071330979	CCOCCN(C[C@@H](O)CN1CCC[C@]2(CC(=O)c3cc(O)ccc3O2)C1)S(=O)(=O)c1ccccc1C	C27H36N2O7S	532.65	37	12	0.52	10	9	2	143.37	124.99	3.5	2.24	3.29	0.59	2.72	2.47	-4.13	0.0392	7.35e-05	Moderately soluble	-4.5	0.0168	3.16e-05	Moderately soluble	-6.29	0.000273	5.13e-07	Poorly soluble	High	No	Yes	No	No	No	Yes	Yes	-7.96	1	3	0	0	0	0.55	0	0	2	5.44
ZINC000071996259	COc1cc2nccc(Oc3ccc(NC(=O)c4c(C)n(C)n(-c5ccccc5)c4=O)cc3F)c2cc1OC	C29H25FN4O5	528.53	39	27	0.14	8	7	1	145.23	96.61	4	4.87	5.46	3.15	4.34	4.37	-6.17	0.000358	6.77e-07	Poorly soluble	-6.63	0.000123	2.32e-07	Poorly soluble	-9.19	3.45e-07	6.53e-10	Poorly soluble	High	No	No	No	Yes	Yes	No	Yes	-6.07	1	2	0	0	0	0.55	0	0	3	3.68
ZINC000072142698	N[C@H](CNc1nnc(-c2ccc3c(c2)CC(=O)N3)s1)Cc1ccc(C(F)(F)F)cc1	C20H18F3N5OS	433.45	30	17	0.25	7	7	3	111.75	121.17	2.97	3.16	4.09	2.85	4.83	3.58	-4.48	0.0145	3.35e-05	Moderately soluble	-5.37	0.00183	4.22e-06	Moderately soluble	-7.78	7.26e-06	1.67e-08	Poorly soluble	High	No	Yes	Yes	Yes	Yes	Yes	Yes	-6.7	0	0	0	0	0	0.55	0	0	1	3.81
ZINC000072177254	O=C(N[C@@H](c1ccc(Cl)c(F)c1)C1CCNCC1)c1ccc2cnccc2c1	C22H21ClFN3O	397.87	28	16	0.27	5	4	2	112.83	54.02	3.12	3.95	4.21	3.44	4.92	3.93	-4.89	0.00515	1.29e-05	Moderately soluble	-4.78	0.00653	1.64e-05	Moderately soluble	-8.29	2.02e-06	5.08e-09	Poorly soluble	High	Yes	Yes	Yes	Yes	No	Yes	Yes	-5.92	0	0	0	0	0	0.55	0	0	2	2.91
ZINC000072177255	O=C(N[C@H](c1ccc(Cl)c(F)c1)C1CCNCC1)c1ccc2cnccc2c1	C22H21ClFN3O	397.87	28	16	0.27	5	4	2	112.83	54.02	3.16	3.95	4.21	3.44	4.92	3.94	-4.89	0.00515	1.29e-05	Moderately soluble	-4.78	0.00653	1.64e-05	Moderately soluble	-8.29	2.02e-06	5.08e-09	Poorly soluble	High	Yes	Yes	Yes	Yes	No	Yes	Yes	-5.92	0	0	0	0	0	0.55	0	0	2	2.91
ZINC000072177455	O=C(N[C@@H](c1ccc(F)c(F)c1)C1CCNCC1)c1ccc2cnccc2c1	C22H21F2N3O	381.42	28	16	0.27	5	5	2	107.78	54.02	2.93	3.42	4.12	3.33	4.71	3.7	-4.45	0.0135	3.53e-05	Moderately soluble	-4.23	0.0222	5.83e-05	Moderately soluble	-7.97	4.08e-06	1.07e-08	Poorly soluble	High	Yes	Yes	No	Yes	No	Yes	Yes	-6.2	0	0	0	0	0	0.55	0	0	1	2.86
ZINC000072177456	O=C(N[C@H](c1ccc(F)c(F)c1)C1CCNCC1)c1ccc2cnccc2c1	C22H21F2N3O	381.42	28	16	0.27	5	5	2	107.78	54.02	3.03	3.42	4.12	3.33	4.71	3.72	-4.45	0.0135	3.53e-05	Moderately soluble	-4.23	0.0222	5.83e-05	Moderately soluble	-7.97	4.08e-06	1.07e-08	Poorly soluble	High	Yes	Yes	No	Yes	No	Yes	Yes	-6.2	0	0	0	0	0	0.55	0	0	1	2.86
ZINC000072177658	O=C(N[C@@H](c1cnc(Cl)c(Cl)c1)C1CCNCC1)c1ccc2cnccc2c1	C21H20Cl2N4O	415.32	28	16	0.29	5	4	2	115.68	66.91	2.98	3.74	3.7	2.5	4.58	3.5	-4.86	0.00568	1.37e-05	Moderately soluble	-4.84	0.00604	1.45e-05	Moderately soluble	-8.24	2.37e-06	5.7e-09	Poorly soluble	High	Yes	Yes	Yes	Yes	Yes	Yes	Yes	-6.18	0	0	0	0	0	0.55	0	1	2	3.21
ZINC000072177659	O=C(N[C@H](c1cnc(Cl)c(Cl)c1)C1CCNCC1)c1ccc2cnccc2c1	C21H20Cl2N4O	415.32	28	16	0.29	5	4	2	115.68	66.91	3.08	3.74	3.7	2.5	4.58	3.52	-4.86	0.00568	1.37e-05	Moderately soluble	-4.84	0.00604	1.45e-05	Moderately soluble	-8.24	2.37e-06	5.7e-09	Poorly soluble	High	Yes	Yes	Yes	Yes	Yes	Yes	Yes	-6.18	0	0	0	0	0	0.55	0	1	2	3.21
ZINC000072177696	O=C(N[C@@H](c1nccs1)C1CCNCC1)c1ccc2cnccc2c1	C19H20N4OS	352.45	25	15	0.32	5	4	2	103.54	95.15	2.46	2.29	2.46	1.12	3.95	2.46	-3.58	0.0923	0.000262	Soluble	-3.93	0.0418	0.000119	Soluble	-6.33	0.000164	4.67e-07	Poorly soluble	High	No	Yes	Yes	Yes	Yes	Yes	Yes	-6.82	0	0	0	0	0	0.55	0	0	1	3.25
ZINC000072177697	O=C(N[C@H](c1nccs1)C1CCNCC1)c1ccc2cnccc2c1	C19H20N4OS	352.45	25	15	0.32	5	4	2	103.54	95.15	2.72	2.29	2.46	1.12	3.95	2.51	-3.58	0.0923	0.000262	Soluble	-3.93	0.0418	0.000119	Soluble	-6.33	0.000164	4.67e-07	Poorly soluble	High	No	Yes	No	Yes	Yes	Yes	Yes	-6.82	0	0	0	0	0	0.55	0	0	1	3.25
ZINC000072178047	N[C@H](CNC(=O)c1ccc2cnccc2c1)Cc1ccc(C(F)(F)F)cc1	C20H18F3N3O	373.37	27	16	0.2	7	6	2	96.55	68.01	2.57	3.35	4.71	2.74	4.26	3.53	-4.24	0.0214	5.73e-05	Moderately soluble	-4.46	0.0131	3.5e-05	Moderately soluble	-7.55	1.06e-05	2.84e-08	Poorly soluble	High	Yes	Yes	No	Yes	No	Yes	Yes	-6.2	0	0	0	0	0	0.55	0	0	1	2.51
ZINC000072178618	O=C(N[C@@H](c1ccc(Cl)c(Cl)c1)C1CCNCC1)c1ccc2[nH]ncc2c1	C20H20Cl2N4O	403.31	27	15	0.3	5	3	3	112.23	69.81	2.53	3.93	3.64	3.41	4.66	3.63	-4.9	0.00511	1.27e-05	Moderately soluble	-5.1	0.00324	8.03e-06	Moderately soluble	-7.84	5.87e-06	1.46e-08	Poorly soluble	High	Yes	Yes	Yes	Yes	Yes	Yes	Yes	-5.97	0	0	0	0	0	0.55	0	0	2	2.85
ZINC000072178619	O=C(N[C@H](c1ccc(Cl)c(Cl)c1)C1CCNCC1)c1ccc2[nH]ncc2c1	C20H20Cl2N4O	403.31	27	15	0.3	5	3	3	112.23	69.81	2.54	3.93	3.64	3.41	4.66	3.63	-4.9	0.00511	1.27e-05	Moderately soluble	-5.1	0.00324	8.03e-06	Moderately soluble	-7.84	5.87e-06	1.46e-08	Poorly soluble	High	Yes	Yes	Yes	Yes	Yes	Yes	Yes	-5.97	0	0	0	0	0	0.55	0	0	2	2.85
ZINC000072178620	O=C(N[C@@H](c1ccc(Cl)c(Cl)c1)C1CCNCC1)c1ccc2cnncc2c1	C21H20Cl2N4O	415.32	28	16	0.29	5	4	2	115.68	66.91	3.15	3.47	3.7	3.32	4.58	3.64	-4.69	0.0084	2.02e-05	Moderately soluble	-4.56	0.0115	2.77e-05	Moderately soluble	-8.24	2.37e-06	5.7e-09	Poorly soluble	High	Yes	Yes	Yes	Yes	Yes	Yes	Yes	-6.37	0	0	0	0	0	0.55	0	0	1	2.91
ZINC000072178621	O=C(N[C@H](c1ccc(Cl)c(Cl)c1)C1CCNCC1)c1ccc2cnncc2c1	C21H20Cl2N4O	415.32	28	16	0.29	5	4	2	115.68	66.91	3.12	3.47	3.7	3.32	4.58	3.64	-4.69	0.0084	2.02e-05	Moderately soluble	-4.56	0.0115	2.77e-05	Moderately soluble	-8.24	2.37e-06	5.7e-09	Poorly soluble	High	Yes	Yes	Yes	Yes	Yes	Yes	Yes	-6.37	0	0	0	0	0	0.55	0	0	1	2.91
ZINC000072178697	COc1cc2cnccc2cc1C(=O)N[C@@H](c1ccc(Cl)c(Cl)c1)C1CCNCC1	C23H23Cl2N3O2	444.35	30	16	0.3	6	4	2	124.38	63.25	3.56	4.45	4.32	3.19	5.2	4.14	-5.4	0.00178	4.01e-06	Moderately soluble	-5.5	0.00141	3.18e-06	Moderately soluble	-8.72	8.55e-07	1.92e-09	Poorly soluble	High	Yes	Yes	Yes	Yes	Yes	Yes	Yes	-5.85	0	0	0	0	0	0.55	0	0	2	3.1
ZINC000072178698	COc1cc2cnccc2cc1C(=O)N[C@H](c1ccc(Cl)c(Cl)c1)C1CCNCC1	C23H23Cl2N3O2	444.35	30	16	0.3	6	4	2	124.38	63.25	3.53	4.45	4.32	3.19	5.2	4.14	-5.4	0.00178	4.01e-06	Moderately soluble	-5.5	0.00141	3.18e-06	Moderately soluble	-8.72	8.55e-07	1.92e-09	Poorly soluble	High	Yes	Yes	Yes	Yes	Yes	Yes	Yes	-5.85	0	0	0	0	0	0.55	0	0	2	3.1
ZINC000072178715	O=C(N[C@@H](c1ccc(Cl)c(Cl)c1)C1CCNCC1)c1ccc2cnc(F)cc2c1	C22H20Cl2FN3O	432.32	29	16	0.27	5	4	2	117.84	54.02	3.34	4.91	4.87	3.92	5.56	4.52	-5.69	0.000879	2.03e-06	Moderately soluble	-5.78	0.000716	1.66e-06	Moderately soluble	-8.88	5.71e-07	1.32e-09	Poorly soluble	High	Yes	Yes	Yes	Yes	Yes	Yes	Yes	-5.45	0	0	0	0	0	0.55	0	1	2	3.01
ZINC000072178716	O=C(N[C@H](c1ccc(Cl)c(Cl)c1)C1CCNCC1)c1ccc2cnc(F)cc2c1	C22H20Cl2FN3O	432.32	29	16	0.27	5	4	2	117.84	54.02	3.47	4.91	4.87	3.92	5.56	4.55	-5.69	0.000879	2.03e-06	Moderately soluble	-5.78	0.000716	1.66e-06	Moderately soluble	-8.88	5.71e-07	1.32e-09	Poorly soluble	High	Yes	Yes	Yes	Yes	Yes	Yes	Yes	-5.45	0	0	0	0	0	0.55	0	1	2	3.01
ZINC000072178717	O=C(N[C@@H](c1ccc(Cl)c(Cl)c1)C1CCNCC1)c1ccc2cnc(Cl)cc2c1	C22H20Cl3N3O	448.77	29	16	0.27	5	3	2	122.89	54.02	3.58	5.44	4.96	4.02	5.78	4.76	-6.13	0.000334	7.45e-07	Poorly soluble	-6.33	0.00021	4.67e-07	Poorly soluble	-9.2	2.83e-07	6.31e-10	Poorly soluble	High	Yes	Yes	Yes	Yes	Yes	Yes	Yes	-5.18	0	0	0	0	1	0.55	0	1	2	2.93
ZINC000072178718	O=C(N[C@H](c1ccc(Cl)c(Cl)c1)C1CCNCC1)c1ccc2cnc(Cl)cc2c1	C22H20Cl3N3O	448.77	29	16	0.27	5	3	2	122.89	54.02	3.56	5.44	4.96	4.02	5.78	4.75	-6.13	0.000334	7.45e-07	Poorly soluble	-6.33	0.00021	4.67e-07	Poorly soluble	-9.2	2.83e-07	6.31e-10	Poorly soluble	High	Yes	Yes	Yes	Yes	Yes	Yes	Yes	-5.18	0	0	0	0	1	0.55	0	1	2	2.93
ZINC000072178719	O=C(N[C@@H](c1ccc(Cl)c(Cl)c1)[C@@H]1CCCNC1)c1ccc2cnccc2c1	C22H21Cl2N3O	414.33	28	16	0.27	5	3	2	117.88	54.02	3.34	4.48	4.31	3.54	5.14	4.16	-5.32	0.00196	4.74e-06	Moderately soluble	-5.33	0.00192	4.63e-06	Moderately soluble	-8.62	1e-06	2.42e-09	Poorly soluble	High	Yes	Yes	No	Yes	Yes	Yes	Yes	-5.65	0	0	0	0	0	0.55	0	0	2	3.18
ZINC000072178720	O=C(N[C@H](c1ccc(Cl)c(Cl)c1)[C@@H]1CCCNC1)c1ccc2cnccc2c1	C22H21Cl2N3O	414.33	28	16	0.27	5	3	2	117.88	54.02	3.25	4.48	4.31	3.54	5.14	4.15	-5.32	0.00196	4.74e-06	Moderately soluble	-5.33	0.00192	4.63e-06	Moderately soluble	-8.62	1e-06	2.42e-09	Poorly soluble	High	Yes	Yes	No	Yes	Yes	Yes	Yes	-5.65	0	0	0	0	0	0.55	0	0	2	3.18
ZINC000072178721	O=C(N[C@@H](c1ccc(Cl)c(Cl)c1)[C@H]1CCCNC1)c1ccc2cnccc2c1	C22H21Cl2N3O	414.33	28	16	0.27	5	3	2	117.88	54.02	3.46	4.48	4.31	3.54	5.14	4.19	-5.32	0.00196	4.74e-06	Moderately soluble	-5.33	0.00192	4.63e-06	Moderately soluble	-8.62	1e-06	2.42e-09	Poorly soluble	High	Yes	Yes	No	Yes	Yes	Yes	Yes	-5.65	0	0	0	0	0	0.55	0	0	2	3.18
ZINC000072178722	O=C(N[C@H](c1ccc(Cl)c(Cl)c1)[C@H]1CCCNC1)c1ccc2cnccc2c1	C22H21Cl2N3O	414.33	28	16	0.27	5	3	2	117.88	54.02	3.16	4.48	4.31	3.54	5.14	4.13	-5.32	0.00196	4.74e-06	Moderately soluble	-5.33	0.00192	4.63e-06	Moderately soluble	-8.62	1e-06	2.42e-09	Poorly soluble	High	Yes	Yes	No	Yes	Yes	Yes	Yes	-5.65	0	0	0	0	0	0.55	0	0	2	3.18
ZINC000072178825	O=C(N[C@@H](c1ccc(Cl)c(-c2ccccc2)c1)C1CCNCC1)c1ccc2cnccc2c1	C28H26ClN3O	455.98	33	22	0.21	6	3	2	138.31	54.02	3.95	5.48	5.32	4.07	6.07	4.98	-6.22	0.000277	6.07e-07	Poorly soluble	-6.37	0.000194	4.24e-07	Poorly soluble	-10.48	1.52e-08	3.33e-11	Insoluble	High	Yes	Yes	No	No	No	Yes	Yes	-5.19	0	1	0	0	1	0.55	0	0	2	3.32
ZINC000072178826	O=C(N[C@H](c1ccc(Cl)c(-c2ccccc2)c1)C1CCNCC1)c1ccc2cnccc2c1	C28H26ClN3O	455.98	33	22	0.21	6	3	2	138.31	54.02	3.8	5.48	5.32	4.07	6.07	4.95	-6.22	0.000277	6.07e-07	Poorly soluble	-6.37	0.000194	4.24e-07	Poorly soluble	-10.48	1.52e-08	3.33e-11	Insoluble	High	Yes	Yes	No	No	No	Yes	Yes	-5.19	0	1	0	0	1	0.55	0	0	2	3.32
ZINC000072178904	O=C(N[C@@H](c1ccc(Cl)c(Cl)c1)[C@@H]1CCNC1)c1ccc2cnccc2c1	C21H19Cl2N3O	400.3	27	16	0.24	5	3	2	113.08	54.02	3.32	4.12	3.92	3.33	4.91	3.92	-5.03	0.00377	9.42e-06	Moderately soluble	-4.96	0.00438	1.09e-05	Moderately soluble	-8.35	1.79e-06	4.47e-09	Poorly soluble	High	Yes	Yes	Yes	Yes	Yes	Yes	Yes	-5.82	0	0	0	0	0	0.55	0	0	2	3.07
ZINC000072178905	O=C(N[C@H](c1ccc(Cl)c(Cl)c1)[C@@H]1CCNC1)c1ccc2cnccc2c1	C21H19Cl2N3O	400.3	27	16	0.24	5	3	2	113.08	54.02	2.98	4.12	3.92	3.33	4.91	3.85	-5.03	0.00377	9.42e-06	Moderately soluble	-4.96	0.00438	1.09e-05	Moderately soluble	-8.35	1.79e-06	4.47e-09	Poorly soluble	High	Yes	Yes	Yes	Yes	Yes	Yes	Yes	-5.82	0	0	0	0	0	0.55	0	0	2	3.07
ZINC000072178906	O=C(N[C@@H](c1ccc(Cl)c(Cl)c1)[C@H]1CCNC1)c1ccc2cnccc2c1	C21H19Cl2N3O	400.3	27	16	0.24	5	3	2	113.08	54.02	3.19	4.12	3.92	3.33	4.91	3.89	-5.03	0.00377	9.42e-06	Moderately soluble	-4.96	0.00438	1.09e-05	Moderately soluble	-8.35	1.79e-06	4.47e-09	Poorly soluble	High	Yes	Yes	Yes	Yes	Yes	Yes	Yes	-5.82	0	0	0	0	0	0.55	0	0	2	3.07
ZINC000072178907	O=C(N[C@H](c1ccc(Cl)c(Cl)c1)[C@H]1CCNC1)c1ccc2cnccc2c1	C21H19Cl2N3O	400.3	27	16	0.24	5	3	2	113.08	54.02	3.14	4.12	3.92	3.33	4.91	3.88	-5.03	0.00377	9.42e-06	Moderately soluble	-4.96	0.00438	1.09e-05	Moderately soluble	-8.35	1.79e-06	4.47e-09	Poorly soluble	High	Yes	Yes	Yes	Yes	Yes	Yes	Yes	-5.82	0	0	0	0	0	0.55	0	0	2	3.07
ZINC000072178908	O=C(N[C@@H](c1ccc(Cl)c(Cl)c1)C1CNC1)c1ccc2cnccc2c1	C20H17Cl2N3O	386.27	26	16	0.2	5	3	2	108.27	54.02	3.03	3.77	3.53	3.12	4.67	3.62	-4.74	0.0071	1.84e-05	Moderately soluble	-4.6	0.00975	2.52e-05	Moderately soluble	-8.08	3.19e-06	8.26e-09	Poorly soluble	High	Yes	Yes	Yes	Yes	Yes	Yes	Yes	-5.98	0	0	0	0	0	0.55	0	0	2	2.63
ZINC000072178909	O=C(N[C@@H](c1ccc(Cl)c(Cl)c1)C1CCCCC1)c1ccc2cnccc2c1	C23H22Cl2N2O	413.34	28	16	0.3	5	2	1	115.97	41.99	3.67	6.53	6.27	4.6	6.11	5.43	-6.61	0.000102	2.46e-07	Poorly soluble	-7.21	2.55e-05	6.18e-08	Poorly soluble	-8.85	5.91e-07	1.43e-09	Poorly soluble	High	No	Yes	Yes	Yes	Yes	Yes	Yes	-4.19	1	1	0	1	1	0.55	0	0	2	2.89
ZINC000072178910	O=C(N[C@H](c1ccc(Cl)c(Cl)c1)C1CCCCC1)c1ccc2cnccc2c1	C23H22Cl2N2O	413.34	28	16	0.3	5	2	1	115.97	41.99	3.73	6.53	6.27	4.6	6.11	5.45	-6.61	0.000102	2.46e-07	Poorly soluble	-7.21	2.55e-05	6.18e-08	Poorly soluble	-8.85	5.91e-07	1.43e-09	Poorly soluble	High	No	Yes	Yes	Yes	Yes	Yes	Yes	-4.19	1	1	0	1	1	0.55	0	0	2	2.89
ZINC000072178916	N#Cc1cc([C@H](NC(=O)c2ccc3cnccc3c2)C2CCNCC2)ccc1Cl	C23H21ClN4O	404.89	29	16	0.26	5	4	2	117.59	77.81	2.96	3.57	3.53	2.37	4.54	3.39	-4.68	0.0085	2.1e-05	Moderately soluble	-4.89	0.00522	1.29e-05	Moderately soluble	-8.1	3.25e-06	8.04e-09	Poorly soluble	High	Yes	Yes	Yes	Yes	Yes	Yes	Yes	-6.24	0	0	0	0	0	0.55	0	0	2	2.94
ZINC000072178917	N#Cc1cc([C@@H](NC(=O)c2ccc3cnccc3c2)C2CCNCC2)ccc1Cl	C23H21ClN4O	404.89	29	16	0.26	5	4	2	117.59	77.81	2.94	3.57	3.53	2.37	4.54	3.39	-4.68	0.0085	2.1e-05	Moderately soluble	-4.89	0.00522	1.29e-05	Moderately soluble	-8.1	3.25e-06	8.04e-09	Poorly soluble	High	Yes	Yes	Yes	Yes	Yes	Yes	Yes	-6.24	0	0	0	0	0	0.55	0	0	2	2.94
ZINC000072179040	O=C(N[C@@H](c1ccccc1)C1CCNCC1)c1ccc2cnccc2c1	C22H23N3O	345.44	26	16	0.27	5	3	2	107.86	54.02	2.81	3.22	3	2.58	3.88	3.1	-4.14	0.0253	7.32e-05	Moderately soluble	-4.03	0.0325	9.4e-05	Moderately soluble	-7.44	1.26e-05	3.64e-08	Poorly soluble	High	Yes	Yes	Yes	Yes	No	Yes	Yes	-6.12	0	0	0	0	0	0.55	0	0	0	2.52
ZINC000072179041	O=C(N[C@H](c1ccccc1)C1CCNCC1)c1ccc2cnccc2c1	C22H23N3O	345.44	26	16	0.27	5	3	2	107.86	54.02	2.83	3.22	3	2.58	3.88	3.1	-4.14	0.0253	7.32e-05	Moderately soluble	-4.03	0.0325	9.4e-05	Moderately soluble	-7.44	1.26e-05	3.64e-08	Poorly soluble	High	Yes	Yes	Yes	Yes	No	Yes	Yes	-6.12	0	0	0	0	0	0.55	0	0	0	2.52
ZINC000072179042	O=C(N[C@@H](c1ccc2ccccc2c1)C1CCNCC1)c1ccc2cnccc2c1	C26H25N3O	395.5	30	20	0.23	5	3	2	125.37	54.02	3.4	4.47	4.15	3.24	4.89	4.03	-5.27	0.00212	5.35e-06	Moderately soluble	-5.32	0.00188	4.74e-06	Moderately soluble	-9.08	3.31e-07	8.38e-10	Poorly soluble	High	Yes	Yes	Yes	No	No	Yes	Yes	-5.54	0	0	0	0	0	0.55	0	0	2	2.75
ZINC000072179043	O=C(N[C@H](c1ccc2ccccc2c1)C1CCNCC1)c1ccc2cnccc2c1	C26H25N3O	395.5	30	20	0.23	5	3	2	125.37	54.02	3.28	4.47	4.15	3.24	4.89	4.01	-5.27	0.00212	5.35e-06	Moderately soluble	-5.32	0.00188	4.74e-06	Moderately soluble	-9.08	3.31e-07	8.38e-10	Poorly soluble	High	Yes	Yes	Yes	No	No	Yes	Yes	-5.54	0	0	0	0	0	0.55	0	0	2	2.75
ZINC000072179044	COc1ccc([C@H](NC(=O)c2ccc3cnccc3c2)C2CCNCC2)cc1F	C23H24FN3O2	393.45	29	16	0.3	6	5	2	114.31	63.25	3.27	3.3	3.57	2.61	4.34	3.42	-4.37	0.0168	4.26e-05	Moderately soluble	-4.3	0.0195	4.97e-05	Moderately soluble	-7.81	6.09e-06	1.55e-08	Poorly soluble	High	Yes	Yes	No	Yes	No	Yes	Yes	-6.36	0	0	0	0	0	0.55	0	0	1	2.95
ZINC000072179045	COc1ccc([C@@H](NC(=O)c2ccc3cnccc3c2)C2CCNCC2)cc1F	C23H24FN3O2	393.45	29	16	0.3	6	5	2	114.31	63.25	3.18	3.3	3.57	2.61	4.34	3.4	-4.37	0.0168	4.26e-05	Moderately soluble	-4.3	0.0195	4.97e-05	Moderately soluble	-7.81	6.09e-06	1.55e-08	Poorly soluble	High	Yes	Yes	No	Yes	No	Yes	Yes	-6.36	0	0	0	0	0	0.55	0	0	1	2.95
ZINC000072179488	O=C(N[C@H](c1ccc(Cl)c(Cl)c1)C1CNC1)c1ccc2cnccc2c1	C20H17Cl2N3O	386.27	26	16	0.2	5	3	2	108.27	54.02	3.02	3.77	3.53	3.12	4.67	3.62	-4.74	0.0071	1.84e-05	Moderately soluble	-4.6	0.00975	2.52e-05	Moderately soluble	-8.08	3.19e-06	8.26e-09	Poorly soluble	High	Yes	Yes	Yes	Yes	Yes	Yes	Yes	-5.98	0	0	0	0	0	0.55	0	0	2	2.63
ZINC000072179612	Nc1cn2nc(-c3cnc(Cl)c(NS(=O)(=O)c4ccc(F)cc4)c3)ccc2n1	C17H12ClFN6O2S	418.83	28	21	0	4	6	2	102.7	123.65	1.77	2.16	4.29	1.95	1.21	2.28	-4.09	0.0342	8.16e-05	Moderately soluble	-4.39	0.0171	4.08e-05	Moderately soluble	-6.79	6.73e-05	1.61e-07	Poorly soluble	High	No	No	Yes	Yes	No	No	Yes	-7.32	0	0	0	0	0	0.55	0	1	1	3.24
ZINC000072179698	O=S(=O)(Nc1cc(-c2ccc3nccn3n2)cnc1Cl)c1ccc(F)cc1	C17H11ClFN5O2S	403.82	27	21	0	4	6	1	98.3	97.63	2.36	2.5	4.69	2.07	1.92	2.71	-4.23	0.0238	5.89e-05	Moderately soluble	-4.2	0.0257	6.37e-05	Moderately soluble	-7.17	2.76e-05	6.82e-08	Poorly soluble	High	No	No	Yes	No	Yes	Yes	Yes	-6.99	0	0	0	0	0	0.55	0	1	1	3.13
ZINC000072179699	CC(=O)Nc1cn2cc(-c3cnc(Cl)c(NS(=O)(=O)c4ccc(F)cc4)c3)ccc2n1	C20H15ClFN5O3S	459.88	31	21	0.05	6	6	2	114.82	113.84	2.57	3.41	5.07	1.89	2.14	3.01	-4.94	0.00522	1.14e-05	Moderately soluble	-5.48	0.00152	3.31e-06	Moderately soluble	-7.87	6.18e-06	1.34e-08	Poorly soluble	Low	No	No	Yes	Yes	Yes	Yes	Yes	-6.68	0	0	0	0	0	0.55	0	1	1	3.35
ZINC000072179850	COc1ccc(-c2cc3cnccc3cc2C(=O)N[C@@H](c2ccc(Cl)c(Cl)c2)C2CCNCC2)cc1	C29H27Cl2N3O2	520.45	36	22	0.24	7	4	2	149.81	63.25	3.77	6.08	5.98	4.16	6.77	5.35	-6.89	6.74e-05	1.3e-07	Poorly soluble	-7.19	3.37e-05	6.48e-08	Poorly soluble	-11.15	3.68e-09	7.08e-12	Insoluble	High	No	Yes	No	Yes	No	Yes	Yes	-5.16	2	3	0	1	1	0.17	0	0	2	3.6
ZINC000072179851	COc1ccc(-c2cc3cnccc3cc2C(=O)N[C@H](c2ccc(Cl)c(Cl)c2)C2CCNCC2)cc1	C29H27Cl2N3O2	520.45	36	22	0.24	7	4	2	149.81	63.25	3.81	6.08	5.98	4.16	6.77	5.36	-6.89	6.74e-05	1.3e-07	Poorly soluble	-7.19	3.37e-05	6.48e-08	Poorly soluble	-11.15	3.68e-09	7.08e-12	Insoluble	High	No	Yes	No	Yes	No	Yes	Yes	-5.16	2	3	0	1	1	0.17	0	0	2	3.6
ZINC000072179882	O=C(N[C@@H](c1cccc(Cl)c1)C1CCNCC1)c1ccc2cnccc2c1	C22H22ClN3O	379.88	27	16	0.27	5	3	2	112.87	54.02	3.12	3.85	3.65	3.06	4.51	3.64	-4.73	0.00709	1.87e-05	Moderately soluble	-4.68	0.00792	2.09e-05	Moderately soluble	-8.03	3.55e-06	9.33e-09	Poorly soluble	High	Yes	Yes	Yes	Yes	Yes	Yes	Yes	-5.88	0	0	0	0	0	0.55	0	0	2	2.75
ZINC000072179883	O=C(N[C@H](c1cccc(Cl)c1)C1CCNCC1)c1ccc2cnccc2c1	C22H22ClN3O	379.88	27	16	0.27	5	3	2	112.87	54.02	3.12	3.85	3.65	3.06	4.51	3.64	-4.73	0.00709	1.87e-05	Moderately soluble	-4.68	0.00792	2.09e-05	Moderately soluble	-8.03	3.55e-06	9.33e-09	Poorly soluble	High	Yes	Yes	Yes	Yes	Yes	Yes	Yes	-5.88	0	0	0	0	0	0.55	0	0	2	2.75
ZINC000072179888	O=C(N[C@@H](c1ccc(Cl)c(Cl)c1)C1CCNCC1)c1ccc2cnccc2c1	C22H21Cl2N3O	414.33	28	16	0.27	5	3	2	117.88	54.02	3.23	4.48	4.31	3.54	5.14	4.14	-5.32	0.00196	4.74e-06	Moderately soluble	-5.33	0.00192	4.63e-06	Moderately soluble	-8.62	1e-06	2.42e-09	Poorly soluble	High	Yes	Yes	Yes	Yes	Yes	Yes	Yes	-5.65	0	0	0	0	0	0.55	0	0	2	2.84
ZINC000072179889	O=C(N[C@H](c1ccc(Cl)c(Cl)c1)C1CCNCC1)c1ccc2cnccc2c1	C22H21Cl2N3O	414.33	28	16	0.27	5	3	2	117.88	54.02	3.29	4.48	4.31	3.54	5.14	4.15	-5.32	0.00196	4.74e-06	Moderately soluble	-5.33	0.00192	4.63e-06	Moderately soluble	-8.62	1e-06	2.42e-09	Poorly soluble	High	Yes	Yes	Yes	Yes	Yes	Yes	Yes	-5.65	0	0	0	0	0	0.55	0	0	2	2.84
ZINC000072179900	CN1CC([C@@H](NC(=O)c2ccc3cnccc3c2)c2ccc(Cl)c(Cl)c2)C1	C21H19Cl2N3O	400.3	27	16	0.24	5	3	1	113.17	45.23	3.35	4.23	3.87	3.33	4.62	3.88	-5.1	0.00321	8.03e-06	Moderately soluble	-4.89	0.00515	1.29e-05	Moderately soluble	-7.74	7.23e-06	1.81e-08	Poorly soluble	High	Yes	Yes	Yes	Yes	Yes	Yes	Yes	-5.74	0	0	0	0	0	0.55	0	0	2	2.74
ZINC000072180022	O=C(N[C@@H](c1ccc(Cl)cc1)C1CCNCC1)c1ccc2cnccc2c1	C22H22ClN3O	379.88	27	16	0.27	5	3	2	112.87	54.02	3.1	3.85	3.65	3.06	4.51	3.64	-4.73	0.00709	1.87e-05	Moderately soluble	-4.68	0.00792	2.09e-05	Moderately soluble	-8.03	3.55e-06	9.33e-09	Poorly soluble	High	Yes	Yes	Yes	Yes	Yes	Yes	Yes	-5.88	0	0	0	0	0	0.55	0	0	2	2.67
ZINC000072180023	O=C(N[C@H](c1ccc(Cl)cc1)C1CCNCC1)c1ccc2cnccc2c1	C22H22ClN3O	379.88	27	16	0.27	5	3	2	112.87	54.02	3.18	3.85	3.65	3.06	4.51	3.65	-4.73	0.00709	1.87e-05	Moderately soluble	-4.68	0.00792	2.09e-05	Moderately soluble	-8.03	3.55e-06	9.33e-09	Poorly soluble	High	Yes	Yes	Yes	Yes	Yes	Yes	Yes	-5.88	0	0	0	0	0	0.55	0	0	2	2.67
ZINC000072180024	O=C(N[C@@H](c1cccc(Cl)c1Cl)C1CCNCC1)c1ccc2cnccc2c1	C22H21Cl2N3O	414.33	28	16	0.27	5	3	2	117.88	54.02	3.3	4.48	4.31	3.54	5.14	4.16	-5.32	0.00196	4.74e-06	Moderately soluble	-5.33	0.00192	4.63e-06	Moderately soluble	-8.62	1e-06	2.42e-09	Poorly soluble	High	Yes	Yes	Yes	Yes	Yes	Yes	Yes	-5.65	0	0	0	0	0	0.55	0	0	2	2.98
ZINC000072180025	O=C(N[C@H](c1cccc(Cl)c1Cl)C1CCNCC1)c1ccc2cnccc2c1	C22H21Cl2N3O	414.33	28	16	0.27	5	3	2	117.88	54.02	3.36	4.48	4.31	3.54	5.14	4.17	-5.32	0.00196	4.74e-06	Moderately soluble	-5.33	0.00192	4.63e-06	Moderately soluble	-8.62	1e-06	2.42e-09	Poorly soluble	High	Yes	Yes	Yes	Yes	Yes	Yes	Yes	-5.65	0	0	0	0	0	0.55	0	0	2	2.98
ZINC000072180031	O=C(N[C@@H](c1ccc(Cl)c(Cl)c1)C1CCN(Cc2ccccc2)CC1)c1ccc2cnccc2c1	C29H27Cl2N3O	504.45	35	22	0.24	7	3	1	147.27	45.23	3.85	6.44	6.07	4.72	6.52	5.52	-7.03	4.73e-05	9.38e-08	Poorly soluble	-7.18	3.3e-05	6.55e-08	Poorly soluble	-10.73	9.39e-09	1.86e-11	Insoluble	High	No	Yes	No	No	No	Yes	Yes	-4.8	2	3	0	1	1	0.17	0	0	2	3.6
ZINC000072180032	O=C(N[C@@H](c1ccc(Cl)c(Cl)c1)C1CCN(Cc2ccc(C(F)(F)F)cc2)CC1)c1ccc2cnccc2c1	C30H26Cl2F3N3O	572.45	39	22	0.27	8	6	1	152.27	45.23	4.23	7.32	8.24	5.45	7.61	6.57	-7.89	7.37e-06	1.29e-08	Poorly soluble	-8.1	4.58e-06	8e-09	Poorly soluble	-11.53	1.67e-09	2.92e-12	Insoluble	Low	No	Yes	No	No	No	Yes	Yes	-4.59	2	3	0	1	1	0.17	0	0	3	3.84
ZINC000072180141	CC(C)CN1CCC([C@@H](NC(=O)c2ccc3cnccc3c2)c2ccc(Cl)c(Cl)c2)CC1	C26H29Cl2N3O	470.43	32	16	0.38	7	3	1	137.21	45.23	4.37	6.28	5.68	4.36	6.11	5.36	-6.62	0.000113	2.39e-07	Poorly soluble	-7.02	4.52e-05	9.6e-08	Poorly soluble	-9.07	3.97e-07	8.43e-10	Poorly soluble	High	Yes	Yes	No	No	No	Yes	Yes	-4.71	1	2	0	0	1	0.55	0	0	2	3.3
ZINC000072180713	Nc1nc2ccc(-c3cnc(Cl)c(NS(=O)(=O)c4ccc(F)cc4)c3)cc2s1	C18H12ClFN4O2S2	434.89	28	21	0	4	5	2	109.34	134.59	2.29	4.17	5.85	2.55	3.96	3.76	-5.45	0.00153	3.51e-06	Moderately soluble	-6.7	8.58e-05	1.97e-07	Poorly soluble	-8.04	4.01e-06	9.23e-09	Poorly soluble	Low	No	No	Yes	Yes	Yes	Yes	Yes	-5.99	0	1	0	1	0	0.55	0	1	2	3.15
ZINC000072180714	O=S(=O)(Nc1cc(-c2ccc3ncsc3c2)cnc1Cl)c1ccc(F)cc1	C18H11ClFN3O2S2	419.88	27	21	0	4	5	1	104.93	108.57	2.67	4.52	6.26	2.69	4.67	4.16	-5.6	0.00105	2.5e-06	Moderately soluble	-6.52	0.000126	3.01e-07	Poorly soluble	-8.41	1.64e-06	3.91e-09	Poorly soluble	Low	No	No	Yes	Yes	Yes	Yes	Yes	-5.65	0	1	0	1	0	0.55	0	1	2	3.05
ZINC000072180731	O=C1Cc2cc(C(=O)N[C@@H](c3ccc(Cl)c(Cl)c3)C3CCNCC3)ccc2N1	C21H21Cl2N3O2	418.32	28	12	0.33	5	3	3	117.88	70.23	2.95	3.15	2.68	3.29	4.55	3.32	-4.41	0.0165	3.93e-05	Moderately soluble	-4.29	0.0212	5.07e-05	Moderately soluble	-7.8	6.6e-06	1.58e-08	Poorly soluble	High	Yes	Yes	No	Yes	Yes	Yes	Yes	-6.62	0	0	0	0	0	0.55	0	0	1	3.12
ZINC000072180732	O=C1Cc2cc(C(=O)N[C@H](c3ccc(Cl)c(Cl)c3)C3CCNCC3)ccc2N1	C21H21Cl2N3O2	418.32	28	12	0.33	5	3	3	117.88	70.23	3.01	3.15	2.68	3.29	4.55	3.34	-4.41	0.0165	3.93e-05	Moderately soluble	-4.29	0.0212	5.07e-05	Moderately soluble	-7.8	6.6e-06	1.58e-08	Poorly soluble	High	Yes	Yes	No	Yes	Yes	Yes	Yes	-6.62	0	0	0	0	0	0.55	0	0	1	3.12
ZINC000072180733	O=C(N[C@@H](c1ccc(Cl)c(Cl)c1)C1CCNCC1)c1ccc2[nH]c(=O)oc2c1	C20H19Cl2N3O3	420.29	28	15	0.3	5	4	3	112.98	87.13	2.88	3.52	3.19	3.19	4.67	3.49	-4.73	0.00783	1.86e-05	Moderately soluble	-5.03	0.00389	9.25e-06	Moderately soluble	-7.73	7.77e-06	1.85e-08	Poorly soluble	High	No	Yes	Yes	Yes	Yes	Yes	Yes	-6.36	0	0	0	0	0	0.55	0	0	2	3.46
ZINC000072180734	O=C(N[C@H](c1ccc(Cl)c(Cl)c1)C1CCNCC1)c1ccc2[nH]c(=O)oc2c1	C20H19Cl2N3O3	420.29	28	15	0.3	5	4	3	112.98	87.13	2.98	3.52	3.19	3.19	4.67	3.51	-4.73	0.00783	1.86e-05	Moderately soluble	-5.03	0.00389	9.25e-06	Moderately soluble	-7.73	7.77e-06	1.85e-08	Poorly soluble	High	No	Yes	Yes	Yes	Yes	Yes	Yes	-6.36	0	0	0	0	0	0.55	0	0	2	3.46
ZINC000072180899	CC(=O)Nc1nc2ccc(-c3cnc(Cl)c(NS(=O)(=O)c4ccc(F)cc4)c3)cc2o1	C20H14ClFN4O4S	460.87	31	21	0.05	6	7	2	113.63	122.57	2.79	3.41	5.56	2.16	3.09	3.4	-4.95	0.00516	1.12e-05	Moderately soluble	-5.66	0.001	2.17e-06	Moderately soluble	-8.7	9.2e-07	2e-09	Poorly soluble	Low	No	No	Yes	Yes	Yes	No	Yes	-6.69	0	0	0	0	0	0.55	0	1	1	3.53
ZINC000072181461	O=S(=O)(Nc1cc(-c2ccc3nccn3c2)cnc1Cl)c1ccc(F)cc1	C18H12ClFN4O2S	402.83	27	21	0	4	5	1	100.5	84.74	2.5	3.9	5.3	2.02	2.47	3.24	-5.11	0.00316	7.83e-06	Moderately soluble	-5.38	0.00169	4.19e-06	Moderately soluble	-7.54	1.16e-05	2.89e-08	Poorly soluble	High	No	No	Yes	Yes	Yes	Yes	Yes	-5.99	0	0	0	0	0	0.55	0	1	2	3.08
ZINC000072181462	CC(=O)Nc1nc2ccc(-c3cnc(Cl)c(NS(=O)(=O)c4ccc(F)cc4)c3)cc2[nH]1	C20H15ClFN5O3S	459.88	31	21	0.05	6	6	3	115.72	125.22	1.42	3.14	5.3	2.16	3.23	3.05	-4.77	0.00772	1.68e-05	Moderately soluble	-5.44	0.00167	3.64e-06	Moderately soluble	-8.7	9.22e-07	2e-09	Poorly soluble	Low	No	No	Yes	Yes	Yes	No	Yes	-6.88	0	0	0	0	0	0.55	0	1	1	3.23
ZINC000072181875	Nc1nc2ccc(-c3cnc(Cl)c(NS(=O)(=O)c4ccc(F)cc4)c3)cc2o1	C18H12ClFN4O3S	418.83	28	21	0	4	6	2	103.73	119.49	2.2	3.56	5.38	2.16	2.71	3.2	-4.97	0.00448	1.07e-05	Moderately soluble	-5.75	0.000737	1.76e-06	Moderately soluble	-8	4.24e-06	1.01e-08	Poorly soluble	Low	No	No	Yes	Yes	Yes	Yes	Yes	-6.33	0	0	0	0	0	0.55	0	1	2	3.37
ZINC000072315645	CC(=O)Nc1cccc(-c2ccc3nc(-c4cccnc4N)n(-c4ccc(CC(=O)Nc5cccc(F)c5)cc4)c3n2)c1	C33H26FN7O2	571.6	43	33	0.06	9	6	3	165.01	127.82	3.54	4.32	6.06	3.7	4.85	4.49	-6.08	0.000476	8.33e-07	Poorly soluble	-6.72	0.000109	1.91e-07	Poorly soluble	-11.86	7.95e-10	1.39e-12	Insoluble	Low	No	No	No	Yes	No	No	Yes	-6.72	1	3	0	1	0	0.55	0	0	3	3.93
ZINC000072317687	O=C(NCc1cccc(O)c1)Nc1nc(-c2ccncc2)cs1	C16H14N4O2S	326.37	23	17	0.06	6	4	3	89.36	115.38	1.62	2.02	2.89	1.04	2.81	2.08	-3.29	0.169	0.000516	Soluble	-4.07	0.0278	8.5e-05	Moderately soluble	-5.81	0.000502	1.54e-06	Moderately soluble	High	No	Yes	Yes	Yes	No	Yes	Yes	-6.86	0	0	0	0	0	0.55	0	0	0	2.7
ZINC000073219542	CC(=O)N1CC[C@@H](Nc2cncc(C(=O)c3cn(C(C)C)c4ncnc(N)c34)n2)[C@H]1c1ccc(F)cc1	C26H27FN8O2	502.54	37	21	0.31	7	7	2	140.96	131.92	3.32	2.15	3.06	1.19	2.18	2.38	-4.27	0.0271	5.39e-05	Moderately soluble	-4.55	0.0141	2.8e-05	Moderately soluble	-6.88	6.55e-05	1.3e-07	Poorly soluble	High	No	Yes	No	No	Yes	Yes	Yes	-7.84	1	2	0	1	0	0.55	0	0	1	4.46
ZINC000073219547	CC(=O)N1CC[C@@H](Nc2cncc(C(=O)c3cn(C(C)C)c4ncnc(N)c34)n2)[C@H]1c1ccccc1	C26H28N8O2	484.55	36	21	0.31	7	6	2	141	131.92	2.88	2.05	2.5	0.82	1.75	2	-4.11	0.038	7.85e-05	Moderately soluble	-4.45	0.0172	3.56e-05	Moderately soluble	-6.63	0.000115	2.37e-07	Poorly soluble	High	No	Yes	No	No	Yes	Yes	Yes	-7.8	0	2	0	1	0	0.55	0	0	1	4.44
ZINC000073222427	CC(C)n1cc(C(=O)c2cncc(N[C@@H]3CCO[C@@H]3c3ccc(F)cc3)n2)c2c(N)ncnc21	C24H24FN7O2	461.49	34	21	0.29	6	7	2	125.42	120.84	2.85	2.5	3.61	1.21	2.6	2.55	-4.34	0.0212	4.6e-05	Moderately soluble	-4.68	0.00957	2.07e-05	Moderately soluble	-7	4.64e-05	1e-07	Poorly soluble	High	No	Yes	No	No	Yes	Yes	Yes	-7.34	0	0	0	0	0	0.55	0	0	1	4.33
ZINC000073222429	CC(C)n1cc(C(=O)c2cncc(N[C@@H]3CNC[C@@H]3c3ccc(F)cc3)n2)c2c(N)ncnc21	C24H25FN8O	460.51	34	21	0.29	6	7	3	131.05	123.64	2.9	2.08	2.78	1.21	2.28	2.25	-4.07	0.0395	8.58e-05	Moderately soluble	-4.31	0.0228	4.94e-05	Moderately soluble	-7.31	2.26e-05	4.9e-08	Poorly soluble	High	No	Yes	No	No	No	Yes	Yes	-7.63	0	1	0	0	0	0.55	0	0	1	4.3
ZINC000073222431	CC(C)n1cc(C(=O)c2cncc(N[C@@H]3CCN[C@@H]3c3ccc(F)cc3)n2)c2c(N)ncnc21	C24H25FN8O	460.51	34	21	0.29	6	7	3	131.05	123.64	2.78	2.22	2.8	1.21	2.28	2.26	-4.15	0.0322	7e-05	Moderately soluble	-4.45	0.0163	3.54e-05	Moderately soluble	-7.31	2.26e-05	4.9e-08	Poorly soluble	High	No	Yes	No	No	No	Yes	Yes	-7.53	0	1	0	0	0	0.55	0	0	1	4.27
ZINC000073223436	CC(C)n1cc(C(=O)c2cncc(N[C@@H]3CCC[C@@H]3c3ccc(F)cc3)n2)c2c(N)ncnc21	C25H26FN7O	459.52	34	21	0.32	6	6	2	129.14	111.61	3.74	3.58	4.74	2.2	3.24	3.5	-5.01	0.00454	9.87e-06	Moderately soluble	-5.61	0.00113	2.45e-06	Moderately soluble	-7.54	1.33e-05	2.89e-08	Poorly soluble	High	No	Yes	No	No	Yes	Yes	Yes	-6.56	0	0	0	0	0	0.55	0	0	2	4.31
ZINC000073223440	CC(C)n1cc(C(=O)c2cncc(N[C@@H]3COC[C@@H]3c3ccc(F)cc3)n2)c2c(N)ncnc21	C24H24FN7O2	461.49	34	21	0.29	6	7	2	125.42	120.84	3.04	2.36	3.59	1.21	2.6	2.56	-4.25	0.026	5.64e-05	Moderately soluble	-4.54	0.0134	2.9e-05	Moderately soluble	-7	4.64e-05	1e-07	Poorly soluble	High	No	Yes	No	No	Yes	Yes	Yes	-7.44	0	0	0	0	0	0.55	0	0	1	4.33
ZINC000073224560	C[C@@H]1O[C@H]2OC(=O)O[C@@H]2C2=C1C(=O)c1c(O)cccc1C2=O	C15H10O7	302.24	22	6	0.27	0	7	1	69.92	99.13	1.36	1.55	1.35	-0.08	1.3	1.09	-2.89	0.387	0.00128	Soluble	-3.24	0.173	0.000574	Soluble	-2.58	0.802	0.00265	Soluble	High	No	No	No	No	No	No	No	-7.04	0	0	0	0	0	0.55	1	0	0	4.15
ZINC000078846346	C=CC(=O)[C@H](Cc1ccccc1)NC(=O)OC(C)(C)C	C16H21NO3	275.34	20	6	0.38	8	3	1	78.91	55.4	2.58	3.26	2.88	2.41	3.01	2.83	-3.29	0.14	0.000507	Soluble	-4.1	0.022	7.99e-05	Moderately soluble	-4.2	0.0176	6.38e-05	Moderately soluble	High	Yes	No	No	Yes	No	No	No	-5.66	0	0	0	0	0	0.55	0	1	1	2.96
ZINC000082157797	CC(C)n1cc(C(=O)c2cncc(N[C@@H]3CCN(C=O)[C@@H]3c3ccc(F)cc3)n2)c2c(N)ncnc21	C25H25FN8O2	488.52	36	21	0.28	7	7	2	136.54	131.92	2.65	2.16	2.67	1.39	1.94	2.16	-4.2	0.0309	6.32e-05	Moderately soluble	-4.56	0.0134	2.74e-05	Moderately soluble	-6.51	0.00015	3.06e-07	Poorly soluble	High	No	Yes	No	No	Yes	Yes	Yes	-7.75	0	2	0	1	0	0.55	0	1	1	4.35
ZINC000084405605	NC1(C(=O)NCc2ccc(Cl)cc2)CCN(c2ccnc3[nH]ccc23)CC1	C20H22ClN5O	383.87	27	15	0.3	5	3	3	110.4	87.04	2.3	2.31	2.3	1.97	3	2.38	-3.76	0.0673	0.000175	Soluble	-3.78	0.0643	0.000167	Soluble	-6.74	7e-05	1.82e-07	Poorly soluble	High	No	Yes	Yes	Yes	No	Yes	Yes	-7	0	0	0	0	0	0.55	0	0	1	2.9
ZINC000084596321	COC(=O)c1cc(NCCN2CCCC2)c(C)c(N2CCN(c3ncnc4[nH]nc(Br)c34)CC2)c1	C24H31BrN8O2	543.46	35	15	0.5	8	6	2	150.16	102.51	3.75	3.97	1.71	2.35	2.81	2.92	-5.5	0.00172	3.16e-06	Moderately soluble	-5.82	0.000816	1.5e-06	Moderately soluble	-6.86	7.54e-05	1.39e-07	Poorly soluble	High	No	No	No	Yes	Yes	Yes	Yes	-6.8	1	2	0	0	0	0.55	0	0	3	3.79
ZINC000084596941	CCC(=O)c1cc(NCCN2CCCC2)c(C)c(N2CCN(c3ncnc4[nH]nc(Br)c34)CC2)c1	C25H33BrN8O	541.49	35	15	0.52	8	5	2	153.89	93.28	3.61	4.27	2.52	2.25	3.66	3.26	-5.68	0.00114	2.11e-06	Moderately soluble	-5.94	0.00062	1.15e-06	Moderately soluble	-7.53	1.62e-05	2.99e-08	Poorly soluble	High	No	Yes	No	Yes	Yes	Yes	Yes	-6.57	1	2	0	0	0	0.55	0	0	3	3.8
ZINC000084596942	Cc1c(NCCN2CCCC2)cc(C(=O)CCC(F)(F)F)cc1N1CCN(c2ncnc3[nH]nc(Br)c23)CC1	C26H32BrF3N8O	609.48	39	15	0.54	10	8	2	158.88	93.28	3.69	5.2	4.71	2.74	4.63	4.19	-6.52	0.000184	3.02e-07	Poorly soluble	-6.91	7.57e-05	1.24e-07	Poorly soluble	-8.34	2.78e-06	4.56e-09	Poorly soluble	High	No	Yes	No	Yes	Yes	Yes	Yes	-6.33	1	3	0	0	2	0.55	0	0	3	3.95
ZINC000084597162	CNS(=O)(=O)c1ccc2ncnc(N3CCN(C(=O)[C@H](N)Cc4ccc(Cl)cc4)CC3)c2c1	C22H25ClN6O3S	488.99	33	16	0.32	7	7	2	133.71	129.9	2.32	1.94	1.73	1.07	1.28	1.67	-3.99	0.05	0.000102	Soluble	-4.29	0.0249	5.1e-05	Moderately soluble	-6.48	0.00016	3.28e-07	Poorly soluble	High	No	Yes	No	No	No	Yes	Yes	-7.91	0	2	0	0	0	0.55	0	0	1	3.57
ZINC000084603658	CCc1n[nH]c2ncnc(N3CCN(c4cc(Cl)cc(NCCN5CCCC5)c4C)CC3)c12	C24H33ClN8	469.03	33	15	0.54	7	4	2	145.97	76.21	3.82	4.55	2.38	2.79	3.68	3.44	-5.49	0.00152	3.24e-06	Moderately soluble	-5.87	0.000628	1.34e-06	Moderately soluble	-7.42	1.77e-05	3.78e-08	Poorly soluble	High	Yes	Yes	No	Yes	Yes	Yes	Yes	-5.93	0	1	0	0	0	0.55	0	0	2	3.64
ZINC000084603660	CCc1n[nH]c2ncnc(N3CCN(c4cc(Cl)cc(NCCN(C)C)c4C)CC3)c12	C22H31ClN8	442.99	31	15	0.5	7	4	2	134.55	76.21	3.61	4.06	2.22	2.38	3.08	3.07	-5.04	0.00404	9.11e-06	Moderately soluble	-5.36	0.00191	4.32e-06	Moderately soluble	-7.12	3.4e-05	7.67e-08	Poorly soluble	High	Yes	No	No	Yes	Yes	Yes	Yes	-6.12	0	1	0	0	0	0.55	0	0	2	3.55
ZINC000084603671	Cc1c(NCCN(C)C)cc(Cl)cc1N1CCN(c2ncnc3[nH]nc(C(F)(F)F)c23)CC1	C21H26ClF3N8	482.93	33	15	0.48	7	7	2	129.78	76.21	3.25	4.15	3.83	2.48	3.25	3.39	-5.32	0.0023	4.75e-06	Moderately soluble	-5.46	0.00168	3.48e-06	Moderately soluble	-7.17	3.28e-05	6.79e-08	Poorly soluble	High	Yes	No	No	Yes	Yes	Yes	Yes	-6.3	0	1	0	0	0	0.55	0	0	2	3.46
ZINC000084616378	Cc1c(NCCN2CCCC2)cc(COCC(F)(F)F)cc1N1CCN(c2ncnc3[nH]nc(Br)c23)CC1	C25H32BrF3N8O	597.47	38	15	0.56	10	8	2	154.74	85.44	4	4.88	4.11	2.62	4.22	3.97	-6.25	0.000335	5.61e-07	Poorly soluble	-6.41	0.000233	3.9e-07	Poorly soluble	-8.15	4.24e-06	7.1e-09	Poorly soluble	High	No	No	No	Yes	Yes	Yes	Yes	-6.48	1	2	0	0	0	0.55	0	0	3	3.98
ZINC000084616380	Cc1c(NCCN2CCCC2)cc(CCC(C)(C)C)cc1N1CCN(c2ncnc3[nH]nc(Br)c23)CC1	C28H41BrN8	569.58	37	15	0.61	9	4	2	167.63	76.21	4.63	6.64	3.9	3.69	4.99	4.77	-7.26	3.13e-05	5.49e-08	Poorly soluble	-8.04	5.17e-06	9.08e-09	Poorly soluble	-8.77	9.72e-07	1.71e-09	Poorly soluble	High	Yes	Yes	No	Yes	No	Yes	No	-5.06	1	3	0	0	1	0.55	0	0	3	4.2
ZINC000084617957	Cc1noc(-c2cc(NCCN3CCCC3)c(C)c(N3CCN(c4ncnc5[nH]nc(Br)c45)CC3)c2)n1	C25H31BrN10O	567.48	37	20	0.48	7	7	2	157.14	115.13	4.09	4.4	2.28	2.5	3.1	3.28	-6.07	0.000485	8.54e-07	Poorly soluble	-6.53	0.000166	2.92e-07	Poorly soluble	-8.12	4.26e-06	7.5e-09	Poorly soluble	High	No	Yes	No	Yes	Yes	Yes	Yes	-6.64	2	2	0	0	0	0.17	0	0	2	4.18
ZINC000084632364	Cc1c(NCCN2CCCC2)cc(Cl)cc1N1CCN(c2ncnc3[nH]nc(Br)c23)CC1	C22H28BrClN8	519.87	32	15	0.5	6	4	2	143.9	76.21	3.67	4.74	2.58	2.96	3.45	3.48	-6	0.00052	9.99e-07	Poorly soluble	-6.07	0.000442	8.51e-07	Poorly soluble	-7.43	1.95e-05	3.75e-08	Poorly soluble	High	Yes	No	No	Yes	Yes	Yes	Yes	-6.11	1	2	0	0	0	0.55	0	0	2	3.52
ZINC000084632479	CCOc1cc(NCCN2CCCC2)c(C)c(N2CCN(c3ncnc4[nH]nc(Br)c34)CC2)c1	C24H33BrN8O	529.48	34	15	0.54	8	5	2	150.18	85.44	3.9	4.45	2.32	2.39	3.26	3.26	-5.72	0.000998	1.88e-06	Moderately soluble	-5.96	0.000576	1.09e-06	Moderately soluble	-7.33	2.47e-05	4.67e-08	Poorly soluble	High	No	No	No	Yes	Yes	Yes	Yes	-6.37	1	2	0	0	0	0.55	0	0	3	3.82
ZINC000084632482	Cc1c(NCCN2CCCC2)cc(OCC(C)C)cc1N1CCN(c2ncnc3[nH]nc(Br)c23)CC1	C26H37BrN8O	557.53	36	15	0.58	9	5	2	159.8	85.44	4.2	5.42	2.96	2.79	3.88	3.85	-6.43	0.000209	3.75e-07	Poorly soluble	-6.97	5.98e-05	1.07e-07	Poorly soluble	-7.73	1.03e-05	1.85e-08	Poorly soluble	High	No	No	No	Yes	No	Yes	Yes	-5.85	1	3	0	0	1	0.55	0	0	3	4.06
ZINC000084633072	Cc1c(NCCN2CCCC2)cc(C(=O)Nc2ccccc2)cc1N1CCN(c2ncnc3[nH]nc(Br)c23)CC1	C29H34BrN9O	604.54	40	21	0.38	9	5	3	173.1	105.31	3.09	4.95	2.99	2.98	3.49	3.5	-6.5	0.000191	3.15e-07	Poorly soluble	-6.9	7.62e-05	1.26e-07	Poorly soluble	-9.22	3.64e-07	6.03e-10	Poorly soluble	High	No	Yes	No	Yes	Yes	Yes	Yes	-6.47	1	3	0	0	1	0.55	0	0	3	4.02
ZINC000084654286	CSc1ccccc1Nc1nc(N2CCN(C3CCNCC3)CC2)nc2c(NCC3CC3)ncnc12	C26H35N9S	505.68	36	16	0.54	8	6	3	158.1	119.43	4.77	3.75	2.19	2.72	2.29	3.14	-5.14	0.00368	7.27e-06	Moderately soluble	-5.95	0.000567	1.12e-06	Moderately soluble	-7.51	1.56e-05	3.08e-08	Poorly soluble	High	No	Yes	No	Yes	No	Yes	Yes	-6.72	1	3	0	0	0	0.55	0	0	3	4.65
ZINC000084669224	COc1ccc(OC)c(/C=C/C(=O)C(=Cc2cc(Br)c(O)c(OC)c2)C(=O)/C=C/c2cc(OC)ccc2OC)c1	C31H29BrO8	609.46	40	18	0.16	12	8	1	157.57	100.52	4.47	6.29	5.82	2.72	7.1	5.28	-7.12	4.6e-05	7.54e-08	Poorly soluble	-8.19	3.94e-06	6.47e-09	Poorly soluble	-8.2	3.85e-06	6.32e-09	Poorly soluble	Low	No	No	No	No	Yes	No	No	-5.55	1	3	1	0	2	0.55	0	3	3	4.19
ZINC000084669234	COc1ccc(/C=C/C(=O)C(=Cc2ccc(OC)c(O)c2)C(=O)/C=C/c2ccc(OC)cc2OC)c(OC)c1	C31H30O8	530.57	39	18	0.16	12	8	1	149.87	100.52	4.57	5.6	5.06	2.17	6.41	4.76	-6.21	0.000329	6.21e-07	Poorly soluble	-7.47	1.78e-05	3.36e-08	Poorly soluble	-7.45	1.89e-05	3.56e-08	Poorly soluble	High	No	No	No	No	Yes	No	Yes	-5.56	1	2	1	0	1	0.55	0	3	3	4.08
ZINC000084670063	NC1(c2ccc(-c3ncc4ncccc4c3-c3ccccc3)cc2)CCC1	C24H21N3	351.44	27	22	0.17	3	3	1	110.27	51.8	3.42	3.97	5.19	3.31	5.41	4.26	-4.93	0.00418	1.19e-05	Moderately soluble	-4.76	0.00613	1.74e-05	Moderately soluble	-9.06	3.06e-07	8.71e-10	Poorly soluble	High	Yes	Yes	Yes	Yes	No	Yes	Yes	-5.63	0	0	0	0	0	0.55	0	0	2	2.86
ZINC000084690518	NC1(c2ccc(-c3c(-c4ccccc4)ncc4nccn34)cc2)CCC1	C22H20N4	340.42	26	21	0.18	3	3	1	103.72	56.21	3.21	3.58	4.29	2.47	3.84	3.48	-4.61	0.00844	2.48e-05	Moderately soluble	-4.45	0.0122	3.58e-05	Moderately soluble	-7.45	1.2e-05	3.53e-08	Poorly soluble	High	Yes	Yes	Yes	Yes	No	Yes	Yes	-5.83	0	0	0	0	0	0.55	0	0	1	2.87
ZINC000084704294	NC1(c2ccc(-c3c(-c4ccccc4)ccc4ncnn34)cc2)CCC1	C22H20N4	340.42	26	21	0.18	3	3	1	103.72	56.21	3.26	3.59	4.29	3.55	3.84	3.71	-4.61	0.00832	2.44e-05	Moderately soluble	-4.46	0.0119	3.49e-05	Moderately soluble	-7.45	1.2e-05	3.53e-08	Poorly soluble	High	Yes	Yes	Yes	Yes	No	Yes	Yes	-5.83	0	0	0	0	0	0.55	0	0	1	2.98
ZINC000084705463	NC1(c2ccc(-c3ncc4ccncc4c3-c3ccccc3)cc2)CCC1	C24H21N3	351.44	27	22	0.17	3	3	1	110.27	51.8	3.25	3.88	5.19	3.04	5.41	4.15	-4.87	0.00476	1.35e-05	Moderately soluble	-4.67	0.0076	2.16e-05	Moderately soluble	-9.06	3.06e-07	8.71e-10	Poorly soluble	High	Yes	Yes	Yes	Yes	No	Yes	Yes	-5.69	0	0	0	0	0	0.55	0	0	2	2.78
ZINC000084705465	NC1(c2ccc(-c3ncc4cccnc4c3-c3ccccc3)cc2)CCC1	C24H21N3	351.44	27	22	0.17	3	3	1	110.27	51.8	3.35	3.97	5.19	3.31	5.41	4.25	-4.93	0.00418	1.19e-05	Moderately soluble	-4.76	0.00613	1.74e-05	Moderately soluble	-9.06	3.06e-07	8.71e-10	Poorly soluble	High	Yes	Yes	Yes	Yes	No	Yes	Yes	-5.63	0	0	0	0	0	0.55	0	0	2	2.82
ZINC000084705470	NC1(c2ccc(-c3c(-c4ccccc4)ccc4ccnn34)cc2)CCC1	C23H21N3	339.43	26	21	0.17	3	2	1	105.93	43.32	3.44	3.91	4.9	4.21	4.41	4.17	-4.81	0.00529	1.56e-05	Moderately soluble	-4.52	0.0103	3.03e-05	Moderately soluble	-7.83	5.08e-06	1.5e-08	Poorly soluble	High	Yes	Yes	Yes	Yes	No	Yes	Yes	-5.59	1	0	0	0	0	0.55	0	0	1	2.96
ZINC000084705474	NC1(c2ccc(-c3c(-c4ccccc4)ccn4ccnc34)cc2)CCC1	C23H21N3	339.43	26	21	0.17	3	2	1	105.93	43.32	3.38	4.57	4.9	3.54	4.41	4.16	-5.22	0.00203	5.98e-06	Moderately soluble	-5.2	0.00213	6.26e-06	Moderately soluble	-7.83	5.08e-06	1.5e-08	Poorly soluble	High	Yes	Yes	Yes	Yes	No	Yes	Yes	-5.13	0	0	0	0	0	0.55	0	0	1	2.71
ZINC000084705477	NC1(c2ccc(-c3c(-c4ccccc4)ccn4ncnc34)cc2)CCC1	C22H20N4	340.42	26	21	0.18	3	3	1	103.72	56.21	3.28	3.56	4.29	3.96	3.84	3.79	-4.59	0.00869	2.55e-05	Moderately soluble	-4.43	0.0128	3.75e-05	Moderately soluble	-7.45	1.2e-05	3.53e-08	Poorly soluble	High	Yes	Yes	Yes	Yes	No	Yes	No	-5.85	0	0	0	0	0	0.55	0	0	1	2.85
ZINC000084705535	Cn1cnc2c(-c3ccc(C4(N)CCC4)cc3)c(-c3ccccc3)ccc21	C24H23N3	353.46	27	21	0.21	3	2	1	111.73	43.84	3.27	4.25	5.14	4.02	4.96	4.33	-5.09	0.0029	8.19e-06	Moderately soluble	-4.88	0.00464	1.31e-05	Moderately soluble	-8.2	2.21e-06	6.27e-09	Poorly soluble	High	Yes	Yes	Yes	Yes	No	Yes	Yes	-5.44	0	0	0	0	0	0.55	0	0	2	2.86
ZINC000084705538	NC1(c2ccc(-c3nc4ccccc4c(=O)n3-c3ccccc3)cc2)CCC1	C24H21N3O	367.44	28	22	0.17	3	3	1	112.64	60.91	3.47	3.65	4.28	4.41	4.49	4.06	-4.8	0.00581	1.58e-05	Moderately soluble	-4.62	0.00886	2.41e-05	Moderately soluble	-8.13	2.72e-06	7.41e-09	Poorly soluble	High	Yes	Yes	Yes	Yes	No	Yes	No	-5.95	1	0	0	0	0	0.55	0	0	2	2.96
ZINC000084705544	NC(=O)c1cnc(-c2ccc(C3(N)CCC3)cc2)c(-c2ccccc2)c1	C22H21N3O	343.42	26	18	0.18	4	3	2	103.07	82	2.66	2.58	3.74	2.54	4.15	3.13	-3.84	0.0493	0.000144	Soluble	-3.95	0.0385	0.000112	Soluble	-7.35	1.53e-05	4.45e-08	Poorly soluble	High	No	Yes	Yes	No	No	Yes	Yes	-6.56	0	0	0	0	0	0.55	0	0	0	2.86
ZINC000084707828	NC1(c2ccc(-c3ncc4cnccc4c3-c3ccccc3)cc2)CCC1	C24H21N3	351.44	27	22	0.17	3	3	1	110.27	51.8	3.1	3.88	5.19	3.04	5.41	4.12	-4.87	0.00476	1.35e-05	Moderately soluble	-4.67	0.0076	2.16e-05	Moderately soluble	-9.06	3.06e-07	8.71e-10	Poorly soluble	High	Yes	Yes	Yes	Yes	No	Yes	Yes	-5.69	0	0	0	0	0	0.55	0	0	2	2.82
ZINC000084708912	NC1(c2ccc(-c3nn4cccc4cc3-c3ccccc3)cc2)CCC1	C23H21N3	339.43	26	21	0.17	3	2	1	105.93	43.32	3.58	3.91	4.9	4.21	4.41	4.2	-4.81	0.00529	1.56e-05	Moderately soluble	-4.52	0.0103	3.03e-05	Moderately soluble	-7.83	5.08e-06	1.5e-08	Poorly soluble	High	Yes	Yes	Yes	Yes	No	Yes	No	-5.59	1	0	0	0	0	0.55	0	0	1	2.81
ZINC000084708953	NC1(c2ccc(-c3nn4ccnc4cc3-c3ccccc3)cc2)CCC1	C22H20N4	340.42	26	21	0.18	3	3	1	103.72	56.21	3.41	3.17	4.29	3.55	3.84	3.65	-4.35	0.0153	4.49e-05	Moderately soluble	-4.02	0.0324	9.53e-05	Moderately soluble	-7.45	1.2e-05	3.53e-08	Poorly soluble	High	Yes	Yes	Yes	No	No	Yes	Yes	-6.13	0	0	0	0	0	0.55	0	0	0	3.02
ZINC000084708956	NC1(c2ccc(-c3nn4ccccc4c3-c3ccccc3)cc2)CCC1	C23H21N3	339.43	26	21	0.17	3	2	1	105.93	43.32	3.58	3.91	4.9	4.21	4.41	4.2	-4.81	0.00529	1.56e-05	Moderately soluble	-4.52	0.0103	3.03e-05	Moderately soluble	-7.83	5.08e-06	1.5e-08	Poorly soluble	High	Yes	Yes	Yes	Yes	No	Yes	No	-5.59	1	0	0	0	0	0.55	0	0	1	2.85
ZINC000084708958	NC1(c2ccc(-c3nc4ccccn4c3-c3ccccc3)cc2)CCC1	C23H21N3	339.43	26	21	0.17	3	2	1	105.93	43.32	3.5	4.65	4.9	3.54	4.41	4.2	-5.27	0.00181	5.33e-06	Moderately soluble	-5.29	0.00176	5.17e-06	Moderately soluble	-7.83	5.08e-06	1.5e-08	Poorly soluble	High	Yes	Yes	Yes	Yes	No	Yes	Yes	-5.07	0	0	0	0	0	0.55	0	0	1	2.84
ZINC000084709011	NC(=O)c1ccn2c(-c3ccccc3)c(-c3ccc(C4(N)CCC4)cc3)nc2c1	C24H22N4O	382.46	29	21	0.17	4	3	2	114.02	86.41	3.18	3.52	4	2.67	3.58	3.39	-4.7	0.00762	1.99e-05	Moderately soluble	-5.02	0.00366	9.58e-06	Moderately soluble	-7.38	1.58e-05	4.13e-08	Poorly soluble	High	No	Yes	Yes	Yes	No	Yes	No	-6.13	0	0	0	0	0	0.55	0	0	2	2.98
ZINC000084709013	NC1(c2ccc(-c3nn4ccc(=O)nc4cc3-c3ccccc3)cc2)CCC1	C23H20N4O	368.43	28	22	0.17	3	4	1	109.99	73.28	3.3	2.37	3.65	3.64	3.88	3.37	-4	0.0368	9.98e-05	Moderately soluble	-3.55	0.104	0.000282	Soluble	-7.76	6.45e-06	1.75e-08	Poorly soluble	High	Yes	Yes	Yes	No	No	Yes	No	-6.86	0	0	0	0	0	0.55	0	0	1	3.1
ZINC000084709015	NC1(c2ccc(-c3ncc4cccn4c3-c3ccccc3)cc2)CCC1	C23H21N3	339.43	26	21	0.17	3	2	1	105.93	43.32	3.42	4.31	4.9	3.13	4.41	4.03	-5.06	0.00296	8.72e-06	Moderately soluble	-4.93	0.00396	1.17e-05	Moderately soluble	-7.83	5.08e-06	1.5e-08	Poorly soluble	High	Yes	Yes	Yes	Yes	No	Yes	Yes	-5.31	0	0	0	0	0	0.55	0	0	1	2.83
ZINC000084709017	NC1(c2ccc(-c3ncc4nccn4c3-c3ccccc3)cc2)CCC1	C22H20N4	340.42	26	21	0.18	3	3	1	103.72	56.21	3.19	3.58	4.29	2.47	3.84	3.47	-4.61	0.00844	2.48e-05	Moderately soluble	-4.45	0.0122	3.58e-05	Moderately soluble	-7.45	1.2e-05	3.53e-08	Poorly soluble	High	Yes	Yes	Yes	Yes	No	Yes	Yes	-5.83	0	0	0	0	0	0.55	0	0	1	2.87
ZINC000084709018	CCn1cnc2cnc(-c3ccc(C4(N)CCC4)cc3)c(-c3ccccc3)c21	C24H24N4	368.47	28	21	0.25	4	3	1	114.33	56.73	3.41	3.52	5.01	3.17	4.77	3.98	-4.63	0.00858	2.33e-05	Moderately soluble	-4.4	0.0148	4.03e-05	Moderately soluble	-8.22	2.19e-06	5.96e-09	Poorly soluble	High	Yes	Yes	Yes	Yes	No	Yes	Yes	-6.05	0	0	0	0	0	0.55	0	0	2	3.13
ZINC000084709021	NC1(c2ccc(-c3ncc4ccccc4c3-c3ccccc3)cc2)CCC1	C25H22N2	350.46	27	22	0.16	3	2	1	112.48	38.91	3.5	4.95	5.8	4.13	5.98	4.87	-5.54	0.00102	2.91e-06	Moderately soluble	-5.5	0.0011	3.13e-06	Moderately soluble	-9.43	1.29e-07	3.69e-10	Poorly soluble	High	Yes	Yes	Yes	Yes	No	Yes	No	-4.92	0	1	0	0	0	0.55	0	0	2	2.84
ZINC000084724343	NC1(c2ccc(-c3nc4ccccc4cc3-c3ccccc3)cc2)CCC1	C25H22N2	350.46	27	22	0.16	3	2	1	112.48	38.91	3.76	5.04	5.8	4.4	5.98	4.99	-5.59	0.000895	2.55e-06	Moderately soluble	-5.6	0.000884	2.52e-06	Moderately soluble	-9.43	1.29e-07	3.69e-10	Poorly soluble	High	Yes	Yes	Yes	Yes	No	Yes	No	-4.86	1	1	0	0	1	0.55	0	0	2	2.84
ZINC000084728698	O=C1/C(=C/c2ccccn2)CSC/C1=C\c1ccccn1	C17H14N2OS	294.37	21	12	0.12	2	3	0	86.64	68.15	2.43	2.18	3.04	1.66	4.22	2.71	-3.33	0.138	0.000468	Soluble	-3.24	0.168	0.000569	Soluble	-5.61	0.000726	2.47e-06	Moderately soluble	High	Yes	No	Yes	Yes	Yes	No	Yes	-6.55	0	0	0	0	0	0.55	1	1	0	3.17
ZINC000084759571	COc1cc(C=C(C(=O)/C=C/c2cccc(OC)c2OC)C(=O)/C=C/c2cccc(OC)c2OC)ccc1O	C31H30O8	530.57	39	18	0.16	12	8	1	149.87	100.52	4.74	5.6	5.06	2.17	6.41	4.8	-6.21	0.000329	6.21e-07	Poorly soluble	-7.47	1.78e-05	3.36e-08	Poorly soluble	-7.45	1.89e-05	3.56e-08	Poorly soluble	High	No	No	No	No	Yes	No	Yes	-5.56	1	2	1	0	1	0.55	0	3	3	4.04
ZINC000095536796	CCc1c(C)[nH]c([C@@H]2C(=O)Nc3ccc(-c4cncc(OC[C@@H](N)Cc5c[nH]c6ccccc56)c4)cc32)c1C	C32H33N5O2	519.64	39	26	0.25	8	4	4	158.67	108.82	3.86	4.59	5.2	2.33	7.19	4.63	-5.92	0.000626	1.21e-06	Moderately soluble	-6.6	0.000131	2.51e-07	Poorly soluble	-11.54	1.51e-09	2.9e-12	Insoluble	High	No	No	Yes	Yes	No	No	Yes	-6.21	1	3	0	0	0	0.55	0	0	3	4.89
ZINC000095548840	CC(C)[C@H](NC(=O)[C@@H]1CC[C@H]2[C@H](NC(=O)[C@H](CCCNC(=N)N)NC(=O)OCc3ccccc3)COC(=O)N12)C(=O)N[C@@H](Cc1ccccc1)C(=O)NCc1ccccc1	C43H55N9O8	825.95	60	18	0.42	26	9	8	225.59	246.17	4.33	3.58	1.51	0.68	2.61	2.54	-5.72	0.00157	1.9e-06	Moderately soluble	-8.44	3.03e-06	3.67e-09	Poorly soluble	-9.93	9.73e-08	1.18e-10	Poorly soluble	Low	No	Yes	No	No	No	No	No	-8.8	3	3	2	1	4	0.17	0	3	3	7.09
ZINC000095548841	CC(C)[C@H](NC(=O)[C@@H]1CC[C@H]2[C@H](NC(=O)[C@H](CCCNC(=N)N)NC(=O)OCc3ccccc3)COC(=O)N12)C(=O)N[C@H](Cc1ccccc1)C(=O)NCc1ccccc1	C43H55N9O8	825.95	60	18	0.42	26	9	8	225.59	246.17	4.18	3.58	1.51	0.68	2.61	2.51	-5.72	0.00157	1.9e-06	Moderately soluble	-8.44	3.03e-06	3.67e-09	Poorly soluble	-9.93	9.73e-08	1.18e-10	Poorly soluble	Low	No	Yes	No	No	No	No	No	-8.8	3	3	2	1	4	0.17	0	3	3	7.09
ZINC000095564503	N=[P@](O)(OP(=O)(O)O)O[P@](=O)(O)OC[C@H]1O[C@@H](n2cnc3c(N)ncnc32)[C@H](O)[C@@H]1O	C10H17N6O12P3	506.2	31	9	0.5	8	16	8	98.11	315.34	0	-4.43	-1.53	-4.79	-5.47	-3.24	0.13	676	1.34	Highly soluble	-1.58	13.4	0.0265	Very soluble	2.9	403000	796	Soluble	Low	No	Yes	No	No	No	No	No	-12.53	3	2	1	1	4	0.11	0	1	2	4.97
ZINC000095564504	N=[P@@](O)(OP(=O)(O)O)O[P@](=O)(O)OC[C@H]1O[C@@H](n2cnc3c(N)ncnc32)[C@H](O)[C@@H]1O	C10H17N6O12P3	506.2	31	9	0.5	8	16	8	98.11	315.34	0	-4.43	-1.53	-4.79	-5.47	-3.24	0.13	676	1.34	Highly soluble	-1.58	13.4	0.0265	Very soluble	2.9	403000	796	Soluble	Low	No	Yes	No	No	No	No	No	-12.53	3	2	1	1	4	0.11	0	1	2	4.97
ZINC000095571627	Nc1ncccc1-c1nc2cc(-c3cccnc3)cnc2n1-c1ccc(CNC(=O)c2ccccc2)cc1	C30H23N7O	497.55	38	33	0.03	7	5	2	147.21	111.61	3.53	3.93	4.91	2.68	4.15	3.84	-5.58	0.0013	2.62e-06	Moderately soluble	-5.97	0.000529	1.06e-06	Moderately soluble	-10.91	6.16e-09	1.24e-11	Insoluble	High	No	No	No	Yes	Yes	No	No	-6.54	0	2	0	0	0	0.55	0	0	2	3.58
ZINC000095571687	Nc1ncccc1-c1nc2cc(Br)cnc2n1-c1ccc(CNC(=O)c2ccccc2)cc1	C25H19BrN6O	499.36	33	27	0.04	6	4	2	131.68	98.72	3.25	4.07	4.61	3.25	3.86	3.81	-5.71	0.000975	1.95e-06	Moderately soluble	-5.85	0.000709	1.42e-06	Moderately soluble	-9.61	1.22e-07	2.44e-10	Poorly soluble	High	No	Yes	Yes	Yes	Yes	Yes	Yes	-6.46	0	2	0	0	0	0.55	0	0	2	3.17
ZINC000095571743	C[C@@H]1C[C@@H](O)c2ncnc(N3CCN(C(=O)[C@@H](c4ccc(Cl)cc4)[C@@H]4CCCCN4)CC3)c21	C25H32ClN5O2	470.01	33	12	0.56	5	5	2	140.03	81.59	3.95	2.57	1.78	2.25	3.04	2.72	-4.31	0.0229	4.87e-05	Moderately soluble	-3.93	0.055	0.000117	Soluble	-5.81	0.00073	1.55e-06	Moderately soluble	High	No	Yes	No	No	No	Yes	Yes	-7.34	0	1	0	0	0	0.55	0	0	1	4.72
ZINC000095571805	C[C@@H]1C[C@@H](O)c2ncnc(N3CCN(C(=O)[C@H](CNCCF)c4ccc(Cl)cc4)CC3)c21	C23H29ClFN5O2	461.96	32	12	0.52	8	6	2	128.66	81.59	3.87	2.01	2	1.94	3.17	2.6	-3.72	0.088	0.000191	Soluble	-3.35	0.206	0.000446	Soluble	-6.15	0.000324	7.01e-07	Poorly soluble	High	No	Yes	No	No	No	Yes	Yes	-7.69	0	0	0	0	0	0.55	0	0	2	4.44
ZINC000095572251	COCCNC[C@@H](C(=O)N1CCN(c2ncnc3c2[C@H](C)C[C@H]3O)CC1)c1ccc(Cl)cc1	C24H32ClN5O3	474	33	12	0.54	9	6	2	134.5	90.82	3.72	1.52	1.25	1.26	2.82	2.11	-3.41	0.184	0.000388	Soluble	-3.04	0.437	0.000921	Soluble	-5.99	0.000485	1.02e-06	Moderately soluble	High	No	Yes	No	No	No	Yes	Yes	-8.11	0	1	0	0	0	0.55	0	0	2	4.59
ZINC000095572280	CC(=O)NCc1ccc(-n2c(-c3cccnc3N)nc3cccnc32)cc1	C20H18N6O	358.4	27	21	0.1	5	4	2	104.08	98.72	2.52	1.72	2.56	1.4	2.17	2.07	-3.39	0.146	0.000406	Soluble	-3.41	0.14	0.00039	Soluble	-6.76	6.19e-05	1.73e-07	Poorly soluble	High	No	Yes	Yes	No	Yes	Yes	Yes	-7.27	0	0	0	0	0	0.55	0	0	1	2.8
ZINC000095572911	C[C@@H]1C[C@@H](O)c2ncnc(N3CCN(C(=O)[C@@H](c4ccc(Cl)cc4)[C@@H]4CCCN4)CC3)c21	C24H30ClN5O2	455.98	32	12	0.54	5	5	2	135.22	81.59	3.74	2.22	1.39	2.04	2.81	2.44	-4.01	0.0442	9.7e-05	Moderately soluble	-3.57	0.123	0.00027	Soluble	-5.54	0.0013	2.85e-06	Moderately soluble	High	No	Yes	No	No	No	Yes	Yes	-7.51	0	1	0	0	0	0.55	0	0	1	4.6
ZINC000095573296	C[C@@H]1C[C@@H](O)c2ncnc(N3CCN(C(=O)[C@H](CNCC4CC4)c4ccc(C(F)(F)F)c(F)c4)CC3)c21	C26H31F4N5O2	521.55	37	12	0.58	9	9	2	136.06	81.59	3.89	2.76	4.03	2.92	4.19	3.56	-4.46	0.0182	3.48e-05	Moderately soluble	-4.13	0.0388	7.44e-05	Moderately soluble	-6.55	0.000146	2.8e-07	Poorly soluble	High	No	Yes	No	No	No	Yes	Yes	-7.52	1	2	0	0	0	0.55	0	0	2	4.8
ZINC000095573339	C[C@@H]1C[C@@H](O)c2ncnc(N3CCN(C(=O)[C@H](CNC4CCOCC4)c4ccc(Cl)cc4)CC3)c21	C26H34ClN5O3	500.03	35	12	0.58	7	6	2	142	90.82	4.1	2.62	1.79	1.66	2.97	2.63	-4.38	0.0207	4.14e-05	Moderately soluble	-4.18	0.0333	6.65e-05	Moderately soluble	-5.92	0.000598	1.2e-06	Moderately soluble	High	No	Yes	No	No	No	Yes	Yes	-7.49	1	2	0	0	0	0.55	0	0	1	4.78
ZINC000095573345	C[C@@H]1C[C@@H](O)c2ncnc(N3CCN(C(=O)[C@H](CN)c4ccc(Cl)cc4)CC3)c21	C21H26ClN5O2	415.92	29	12	0.48	5	5	2	118.9	95.58	3.07	1.15	0.98	1.41	2.02	1.72	-3.12	0.316	0.00076	Soluble	-2.75	0.737	0.00177	Soluble	-4.7	0.0083	2e-05	Moderately soluble	High	No	Yes	No	No	No	Yes	No	-8.02	0	0	0	0	0	0.55	0	0	1	4.19
ZINC000095573416	CC(C)(C)c1ccc(-n2c(-c3cccnc3N)nc3cccnc32)cc1	C21H21N5	343.42	26	21	0.19	3	3	1	105.77	69.62	3.26	4.28	4.37	2.9	3.48	3.66	-5.07	0.00295	8.6e-06	Moderately soluble	-5.45	0.00121	3.51e-06	Moderately soluble	-7.19	2.21e-05	6.44e-08	Poorly soluble	High	Yes	Yes	Yes	Yes	Yes	Yes	Yes	-5.36	0	0	0	0	0	0.55	0	0	1	2.96
ZINC000095573430	C[C@@H]1C[C@@H](O)c2ncnc(N3CCN(C(=O)[C@H](CNCC4CCOCC4)c4ccc(Cl)cc4)CC3)c21	C27H36ClN5O3	514.06	36	12	0.59	8	6	2	146.81	90.82	4.44	2.26	2.03	1.86	3.37	2.79	-4.17	0.0348	6.77e-05	Moderately soluble	-3.8	0.0808	0.000157	Soluble	-6.31	0.000252	4.9e-07	Poorly soluble	High	No	Yes	No	No	No	Yes	Yes	-7.83	1	3	0	0	0	0.55	0	0	2	4.9
ZINC000095573847	NCc1ccc(-n2c(-c3cccnc3)nc3cccnc32)cc1	C18H15N5	301.35	23	21	0.06	3	4	1	89.77	69.62	2.4	1.81	2.79	1.55	2.54	2.22	-3.33	0.142	0.000472	Soluble	-2.89	0.387	0.00128	Soluble	-6.41	0.000118	3.9e-07	Poorly soluble	High	Yes	Yes	Yes	Yes	No	Yes	Yes	-6.85	0	0	0	0	0	0.55	0	0	0	2.55
ZINC000095573985	C[C@@H]1C[C@@H](O)c2ncnc(N3CCN(C(=O)[C@H](CN)c4ccc(C(F)(F)F)cc4)CC3)c21	C22H26F3N5O2	449.47	32	12	0.5	6	8	2	118.9	95.58	2.94	1.41	2.49	1.73	2.46	2.21	-3.4	0.18	0.000401	Soluble	-3.02	0.428	0.000952	Soluble	-4.94	0.00518	1.15e-05	Moderately soluble	High	No	Yes	No	No	No	Yes	No	-8.04	0	0	0	0	0	0.55	0	0	1	4.34
ZINC000095574417	C[C@@H]1C[C@@H](O)c2ncnc(N3CCN(C(=O)[C@H](CNCC(F)(F)F)c4ccc(Cl)cc4)CC3)c21	C23H27ClF3N5O2	497.94	34	12	0.52	8	8	2	128.8	81.59	3.66	2.78	3.43	2.15	3.44	3.09	-4.41	0.0193	3.87e-05	Moderately soluble	-4.15	0.0353	7.09e-05	Moderately soluble	-6.32	0.00024	4.82e-07	Poorly soluble	High	No	Yes	No	No	No	Yes	Yes	-7.36	0	1	0	0	0	0.55	0	0	2	4.43
ZINC000095574513	C[C@@H]1C[C@@H](O)c2ncnc(N3CCN(C(=O)[C@H](CNC(C)(C)C)c4ccc(C(F)(F)F)c(F)c4)CC3)c21	C26H33F4N5O2	523.57	37	12	0.58	8	9	2	138.21	81.59	4.2	3	4.48	2.92	4.24	3.77	-4.69	0.0107	2.05e-05	Moderately soluble	-4.38	0.0219	4.19e-05	Moderately soluble	-6.76	9.16e-05	1.75e-07	Poorly soluble	High	No	Yes	No	No	No	Yes	Yes	-7.36	1	2	0	0	0	0.55	0	0	2	4.89
ZINC000095574526	Nc1ncccc1-c1nc2ccc(-c3cccnc3)nc2n1-c1ccc(CC(=O)Nc2ccccc2)cc1	C30H23N7O	497.55	38	33	0.03	7	5	2	148.53	111.61	3.22	3.97	5.13	2.95	4.15	3.88	-5.61	0.00123	2.47e-06	Moderately soluble	-6.01	0.000481	9.67e-07	Poorly soluble	-10.91	6.16e-09	1.24e-11	Insoluble	High	No	No	No	Yes	Yes	No	Yes	-6.52	0	2	0	0	0	0.55	0	0	2	3.62
ZINC000095574552	Nc1ncccc1-c1nc2cc(-c3cccnc3)cnc2n1-c1ccc(CNC(=O)c2cccc(F)c2)cc1	C30H22FN7O	515.54	39	33	0.03	7	6	2	147.17	111.61	3.23	4.03	5.47	3.04	4.57	4.07	-5.74	0.000939	1.82e-06	Moderately soluble	-6.08	0.000432	8.38e-07	Poorly soluble	-11.17	3.52e-09	6.82e-12	Insoluble	Low	No	No	No	Yes	Yes	No	Yes	-6.58	1	2	0	0	0	0.55	0	0	2	3.6
ZINC000095574577	NCc1ccc(-n2c(-c3cccnc3N)nc3cccnc32)cc1	C18H16N6	316.36	24	21	0.06	3	4	2	94.17	95.64	2.19	1.46	2.38	1.41	1.81	1.85	-3.17	0.214	0.000675	Soluble	-3.07	0.266	0.000842	Soluble	-6.04	0.000287	9.06e-07	Poorly soluble	High	No	Yes	Yes	No	No	Yes	Yes	-7.19	0	0	0	0	0	0.55	0	0	0	2.74
ZINC000095574615	Nc1ncccc1-c1nc2cccnc2n1-c1ccc(NC(=O)c2ccccc2)cc1	C24H18N6O	406.44	31	27	0	5	4	2	120.71	98.72	2.79	3.44	4.13	2.74	2.8	3.18	-4.84	0.00585	1.44e-05	Moderately soluble	-5.19	0.0026	6.4e-06	Moderately soluble	-8.45	1.44e-06	3.55e-09	Poorly soluble	High	No	Yes	Yes	No	Yes	Yes	Yes	-6.34	0	0	0	0	0	0.55	0	0	1	2.96
ZINC000095575198	C[C@@H]1C[C@@H](O)c2ncnc(N3CCN(C(=O)[C@H](CN4CCC(F)CC4)c4ccc(Cl)cc4)CC3)c21	C26H33ClFN5O2	502.02	35	12	0.58	6	6	1	144.98	72.8	3.8	3.03	2.49	2.55	3.28	3.03	-4.72	0.00958	1.91e-05	Moderately soluble	-4.22	0.03	5.97e-05	Moderately soluble	-5.74	0.000907	1.81e-06	Moderately soluble	High	Yes	No	No	No	No	Yes	Yes	-7.21	1	2	0	0	0	0.55	0	0	1	4.86
ZINC000095575300	COc1ccccc1Cn1c(-c2ccncc2)nc2cc(Br)cnc21	C19H15BrN4O	395.25	25	21	0.11	4	4	0	100.7	52.83	2.96	3.55	4.31	2.39	3.96	3.44	-4.88	0.00515	1.3e-05	Moderately soluble	-4.34	0.0179	4.52e-05	Moderately soluble	-7.68	8.16e-06	2.07e-08	Poorly soluble	High	Yes	Yes	Yes	Yes	Yes	Yes	Yes	-6.19	0	0	0	0	0	0.55	0	0	2	2.52
ZINC000095575731	Nc1ncccc1-c1nc2cccnc2n1-c1ccc(CNCc2ccccc2)cc1	C25H22N6	406.48	31	27	0.08	6	4	2	123.56	81.65	3.05	3.47	4.06	3.14	3.65	3.47	-4.79	0.00652	1.6e-05	Moderately soluble	-4.87	0.00553	1.36e-05	Moderately soluble	-9.31	1.99e-07	4.9e-10	Poorly soluble	High	No	Yes	Yes	Yes	Yes	Yes	Yes	-6.32	0	0	0	0	0	0.55	0	0	1	3.16
ZINC000095575755	CC(C)NC[C@@H](C(=O)N1CCN(c2ncnc3c2[C@H](C)CC3(F)F)CC1)c1ccc(Cl)cc1	C24H30ClF2N5O	477.98	33	12	0.54	7	6	1	132.24	61.36	4.12	3.76	4.13	3.32	4.41	3.95	-4.98	0.00501	1.05e-05	Moderately soluble	-4.74	0.00867	1.81e-05	Moderately soluble	-7.22	2.85e-05	5.97e-08	Poorly soluble	High	Yes	Yes	No	No	No	Yes	Yes	-6.55	0	1	0	0	0	0.55	0	0	2	4.41
ZINC000095575797	C[C@@H]1C[C@@H](O)c2ncnc(N3CCN(C(=O)[C@H](CNC4CCOCC4)c4ccc(Cl)c(F)c4)CC3)c21	C26H33ClFN5O3	518.02	36	12	0.58	7	7	2	141.96	90.82	4.11	2.72	2.34	2.03	3.39	2.92	-4.55	0.0146	2.82e-05	Moderately soluble	-4.28	0.0271	5.24e-05	Moderately soluble	-6.18	0.000342	6.61e-07	Poorly soluble	High	No	Yes	No	No	No	Yes	Yes	-7.53	1	2	0	0	0	0.55	0	0	1	4.87
ZINC000095575904	Nc1ncccc1-c1nc2ccc(-c3ccccc3)nc2n1-c1ccc(CNC(=O)c2ccccc2)cc1	C31H24N6O	496.56	38	33	0.03	7	4	2	149.42	98.72	3.64	5.04	5.52	3.66	4.73	4.52	-6.27	0.000264	5.31e-07	Poorly soluble	-6.85	6.94e-05	1.4e-07	Poorly soluble	-11.28	2.61e-09	5.25e-12	Insoluble	High	No	No	No	Yes	No	No	No	-5.75	0	2	0	0	1	0.55	0	0	2	3.58
ZINC000095576373	Nc1ncccc1-c1nc2cccnc2n1-c1ccc(CNC(=O)c2ccccc2)cc1	C25H20N6O	420.47	32	27	0.04	6	4	2	123.98	98.72	3.01	3.38	3.85	2.68	3.19	3.22	-4.8	0.00659	1.57e-05	Moderately soluble	-5.13	0.0031	7.38e-06	Moderately soluble	-8.84	6.05e-07	1.44e-09	Poorly soluble	High	No	Yes	Yes	Yes	Yes	Yes	Yes	-6.47	0	0	0	0	0	0.55	0	0	1	3.07
ZINC000095576521	CC(C)NC[C@@H](C(=O)N1CCN(c2ncnc3c2[C@H](C)CC3)CC1)c1ccc(Cl)cc1	C24H32ClN5O	442	31	12	0.54	7	4	1	132.26	61.36	4.29	3.57	2.85	2.84	3.99	3.51	-4.65	0.00981	2.22e-05	Moderately soluble	-4.54	0.0126	2.86e-05	Moderately soluble	-6.71	8.54e-05	1.93e-07	Poorly soluble	High	Yes	Yes	No	No	No	Yes	Yes	-6.46	0	1	0	0	0	0.55	0	0	2	4.24
ZINC000095576945	CC(C)NC[C@@H](C(=O)N1CCN(c2ncnc3c2[C@H](CF)CC3)CC1)c1ccc(Cl)cc1	C24H31ClFN5O	459.99	32	12	0.54	8	5	1	132.31	61.36	4.32	3.38	3.22	2.95	4.29	3.63	-4.57	0.0124	2.69e-05	Moderately soluble	-4.35	0.0207	4.5e-05	Moderately soluble	-6.99	4.69e-05	1.02e-07	Poorly soluble	High	Yes	Yes	No	No	No	Yes	Yes	-6.71	0	1	0	0	0	0.55	0	0	2	4.34
ZINC000095577645	Nc1ncccc1-c1nc2cccnc2n1-c1ccc(CC(=O)Nc2ccccc2)cc1	C25H20N6O	420.47	32	27	0.04	6	4	2	125.3	98.72	2.83	3.38	4.06	2.94	3.19	3.28	-4.8	0.00659	1.57e-05	Moderately soluble	-5.13	0.0031	7.38e-06	Moderately soluble	-8.84	6.05e-07	1.44e-09	Poorly soluble	High	No	Yes	Yes	Yes	Yes	Yes	Yes	-6.47	0	0	0	0	0	0.55	0	0	1	3.09
ZINC000095577970	CC(C)NC[C@@H](C(=O)N1CCN(c2ncnc3c2[C@H](CO)CC3)CC1)c1ccc(Cl)cc1	C24H32ClN5O2	458	32	12	0.54	8	5	2	133.42	81.59	4.01	2.35	1.82	2.04	3.38	2.72	-3.91	0.0564	0.000123	Soluble	-3.7	0.0907	0.000198	Soluble	-6.14	0.000332	7.24e-07	Poorly soluble	High	No	Yes	No	No	No	Yes	Yes	-7.43	0	1	0	0	0	0.55	0	0	2	4.33
ZINC000095578229	Nc1ncccc1-c1nc2ccc(-c3cccnc3)nc2n1-c1ccc(CNC(=O)c2ccccc2)cc1	C30H23N7O	497.55	38	33	0.03	7	5	2	147.21	111.61	3.2	3.97	4.91	2.68	4.15	3.78	-5.61	0.00123	2.47e-06	Moderately soluble	-6.01	0.000481	9.67e-07	Poorly soluble	-10.91	6.16e-09	1.24e-11	Insoluble	High	No	No	No	Yes	Yes	No	No	-6.52	0	2	0	0	0	0.55	0	0	2	3.62
ZINC000095578545	CC(C)NC[C@@H](C(=O)N1CCN(c2ncnc3c2[C@H](C)C[C@H]3O)CC1)c1ccc(Cl)c(F)c1	C24H31ClFN5O2	475.99	33	12	0.54	7	6	2	133.38	81.59	4.18	2.56	2.57	2.41	3.53	3.05	-4.21	0.0293	6.15e-05	Moderately soluble	-3.92	0.0571	0.00012	Soluble	-6.15	0.000335	7.03e-07	Poorly soluble	High	No	Yes	No	No	No	Yes	Yes	-7.39	0	1	0	0	0	0.55	0	0	1	4.64
ZINC000095578565	C=C[C@@H]1CCc2ncnc(N3CCN(C(=O)[C@H](CNC(C)C)c4ccc(Cl)cc4)CC3)c21	C25H32ClN5O	454.01	32	12	0.48	8	4	1	136.59	61.36	4.48	3.85	3.01	2.97	4.38	3.74	-4.83	0.00672	1.48e-05	Moderately soluble	-4.83	0.00664	1.46e-05	Moderately soluble	-6.76	7.87e-05	1.73e-07	Poorly soluble	High	Yes	Yes	No	Yes	Yes	Yes	Yes	-6.34	0	1	0	0	0	0.55	0	1	3	4.42
ZINC000095578609	Nc1ncccc1-c1nc2cc(C3CCCC3)cnc2n1-c1ccc(CNC(=O)c2ccccc2)cc1	C30H28N6O	488.58	37	27	0.2	7	4	2	146.06	98.72	4.24	5.37	5.51	3.67	4.6	4.68	-6.33	0.000228	4.67e-07	Poorly soluble	-7.2	3.11e-05	6.36e-08	Poorly soluble	-9.93	5.74e-08	1.17e-10	Poorly soluble	High	No	No	No	Yes	No	Yes	No	-5.47	0	2	0	0	1	0.55	0	0	2	3.68
ZINC000095578774	Nc1ncccc1-c1nc2cccnc2n1-c1ccc(CNC(=O)Cc2ccccc2)cc1	C26H22N6O	434.49	33	27	0.08	7	4	2	128.57	98.72	2.88	3.31	3.78	2.88	3.58	3.29	-4.76	0.00751	1.73e-05	Moderately soluble	-5.06	0.00379	8.73e-06	Moderately soluble	-9.23	2.54e-07	5.85e-10	Poorly soluble	High	No	Yes	Yes	Yes	Yes	Yes	Yes	-6.6	0	0	0	0	0	0.55	0	0	1	3.16
ZINC000095579215	C[C@@H]1C[C@@H](O)c2ncnc(N3CCN(C(=O)[C@H](CNCC4CC4)c4ccc(Cl)cc4)CC3)c21	C25H32ClN5O2	470.01	33	12	0.56	8	5	2	136.11	81.59	4.06	2.41	1.95	2.25	3.31	2.8	-4.01	0.0456	9.7e-05	Moderately soluble	-3.77	0.0807	0.000172	Soluble	-6.06	0.000408	8.69e-07	Poorly soluble	High	No	Yes	No	No	No	Yes	Yes	-7.46	0	1	0	0	0	0.55	0	0	2	4.57
ZINC000095579268	Nc1ncccc1-c1nc2cc(-c3ccccc3)cnc2n1-c1ccc(CNC(=O)c2ccccc2)cc1	C31H24N6O	496.56	38	33	0.03	7	4	2	149.42	98.72	3.79	5	5.52	3.66	4.73	4.54	-6.25	0.00028	5.63e-07	Poorly soluble	-6.81	7.64e-05	1.54e-07	Poorly soluble	-11.28	2.61e-09	5.25e-12	Insoluble	High	No	No	No	Yes	No	No	No	-5.78	0	2	0	0	0	0.55	0	0	2	3.63
ZINC000095579353	CC(=O)Nc1cccc(-c2ccc3nc(-c4cccnc4N)n(-c4ccc(CNC(=O)c5ccccc5)cc4)c3n2)c1	C33H27N7O2	553.61	42	33	0.06	9	5	3	163.73	127.82	3.85	4.22	5.29	3.08	4.42	4.17	-5.92	0.000668	1.21e-06	Moderately soluble	-6.61	0.000134	2.43e-07	Poorly soluble	-11.6	1.39e-09	2.51e-12	Insoluble	Low	No	No	No	Yes	Yes	No	No	-6.68	1	2	0	0	0	0.55	0	0	3	3.88
ZINC000095579688	C[C@@H]1C[C@@H](O)c2ncnc(N3CCN(C(=O)[C@@H](c4ccc(Cl)cc4)[C@@H]4COCCN4)CC3)c21	C24H30ClN5O3	471.98	33	12	0.54	5	6	2	136.31	90.82	3.5	1.36	0.62	1.26	2.4	1.83	-3.56	0.129	0.000274	Soluble	-2.87	0.637	0.00135	Soluble	-5.27	0.00254	5.38e-06	Moderately soluble	High	No	Yes	No	No	No	Yes	Yes	-8.21	0	1	0	0	0	0.55	0	0	1	4.72
ZINC000095579709	CC(=O)Nc1ccc(-n2c(-c3cccnc3N)nc3cccnc32)cc1	C19H16N6O	344.37	26	21	0.05	4	4	2	100.81	98.72	2.09	1.78	2.84	1.44	1.78	1.99	-3.43	0.128	0.000371	Soluble	-3.47	0.116	0.000338	Soluble	-6.37	0.000148	4.29e-07	Poorly soluble	High	No	Yes	Yes	No	Yes	Yes	Yes	-7.14	0	0	0	0	0	0.55	0	0	0	2.72
ZINC000095579720	CC(C)NC[C@@H](C(=O)N1CCN(c2ncnc3c2[C@H](C)C[C@@H]3F)CC1)c1ccc(Cl)cc1	C24H31ClFN5O	459.99	32	12	0.54	7	5	1	132.31	61.36	4.1	3.49	3.41	2.95	4	3.59	-4.71	0.00905	1.97e-05	Moderately soluble	-4.46	0.0159	3.46e-05	Moderately soluble	-6.74	8.29e-05	1.8e-07	Poorly soluble	High	Yes	Yes	No	No	No	Yes	Yes	-6.63	0	1	0	0	0	0.55	0	0	1	4.61
ZINC000095579746	CC(C)N(C)C[C@@H](C(=O)N1CCN(c2ncnc3c2[C@H](C)C[C@H]3O)CC1)c1ccc(Cl)cc1	C25H34ClN5O2	472.02	33	12	0.56	7	5	1	138.32	72.8	3.89	2.93	2.36	2.25	3.06	2.9	-4.42	0.018	3.81e-05	Moderately soluble	-4.12	0.0358	7.58e-05	Moderately soluble	-5.55	0.00133	2.82e-06	Moderately soluble	High	Yes	Yes	No	No	No	Yes	Yes	-7.1	0	1	0	0	0	0.55	0	0	1	4.66
ZINC000095579760	CC(=O)Nc1cccc(-c2ccc3nc(-c4cccnc4N)n(-c4ccc(CNC(=O)c5cccc(F)c5)cc4)c3n2)c1	C33H26FN7O2	571.6	43	33	0.06	9	6	3	163.69	127.82	3.69	4.32	5.84	3.44	4.85	4.43	-6.08	0.000476	8.33e-07	Poorly soluble	-6.72	0.000109	1.91e-07	Poorly soluble	-11.86	7.95e-10	1.39e-12	Insoluble	Low	No	No	No	Yes	No	No	Yes	-6.72	1	3	0	0	0	0.55	0	0	3	3.9
ZINC000095579877	CC(=O)Nc1cccc(-c2ccc3nc(-c4cccnc4N)n(-c4ccc(CC(=O)Nc5ccccc5)cc4)c3n2)c1	C33H27N7O2	553.61	42	33	0.06	9	5	3	165.05	127.82	3.79	4.22	5.5	3.34	4.42	4.25	-5.92	0.000668	1.21e-06	Moderately soluble	-6.61	0.000134	2.43e-07	Poorly soluble	-11.6	1.39e-09	2.51e-12	Insoluble	Low	No	No	No	Yes	Yes	No	Yes	-6.68	1	2	0	0	0	0.55	0	0	3	3.9
ZINC000095580215	CC(C)NC[C@@H](C(=O)N1CCN(c2ncnc3c2[C@H](C)C[C@@H]3O)CC1)c1ccc(Cl)cc1	C24H32ClN5O2	458	32	12	0.54	7	5	2	133.42	81.59	3.75	2.46	2.02	2.04	3.1	2.67	-4.04	0.0413	9.02e-05	Moderately soluble	-3.82	0.0697	0.000152	Soluble	-5.89	0.000587	1.28e-06	Moderately soluble	High	No	Yes	No	No	No	Yes	Yes	-7.35	0	1	0	0	0	0.55	0	0	1	4.55
ZINC000095580263	Nc1ncccc1-c1nc2cccnc2n1-c1ccc(CNC(=O)C2CCCCC2)cc1	C25H26N6O	426.51	32	21	0.28	6	4	2	126	98.72	3.42	3.8	4.12	2.88	3.29	3.5	-4.97	0.00459	1.08e-05	Moderately soluble	-5.57	0.00115	2.71e-06	Moderately soluble	-7.76	7.48e-06	1.75e-08	Poorly soluble	High	No	Yes	Yes	Yes	Yes	Yes	Yes	-6.2	0	0	0	0	0	0.55	0	0	2	3.25
ZINC000095580289	Nc1ccc(-n2c(-c3cccnc3N)nc3cccnc32)cc1	C17H14N6	302.33	23	21	0	2	3	2	90.9	95.64	2.04	1.92	2.66	1.44	1.44	1.9	-3.47	0.103	0.000341	Soluble	-3.55	0.0848	0.000281	Soluble	-5.64	0.000685	2.26e-06	Moderately soluble	High	No	Yes	Yes	No	No	Yes	Yes	-6.78	0	0	0	0	0	0.55	1	1	0	2.64
ZINC000095580355	C[C@@H]1C[C@@H](O)c2ncnc(N3CCN(C(=O)[C@H](CNC4CCCCC4)c4ccc(Cl)cc4)CC3)c21	C27H36ClN5O2	498.06	35	12	0.59	7	5	2	145.73	81.59	3.54	4.02	2.94	2.65	3.62	3.35	-5.25	0.00279	5.59e-06	Moderately soluble	-5.44	0.00182	3.66e-06	Moderately soluble	-6.46	0.000172	3.45e-07	Poorly soluble	High	No	Yes	No	No	No	Yes	Yes	-6.48	0	3	0	0	0	0.55	0	0	2	4.8
ZINC000095580420	CC(C)NC[C@@H](C(=O)N1CCN(c2ncnc3c2[C@H](C)C[C@H]3F)CC1)c1ccc(Cl)cc1	C24H31ClFN5O	459.99	32	12	0.54	7	5	1	132.31	61.36	4.03	3.49	3.41	2.95	4	3.58	-4.71	0.00905	1.97e-05	Moderately soluble	-4.46	0.0159	3.46e-05	Moderately soluble	-6.74	8.29e-05	1.8e-07	Poorly soluble	High	Yes	Yes	No	No	No	Yes	Yes	-6.63	0	1	0	0	0	0.55	0	0	1	4.61
ZINC000095580423	Nc1ncccc1-c1nc2ccc(-c3cccnc3)nc2n1-c1ccc(CNC(=O)c2cccc(F)c2)cc1	C30H22FN7O	515.54	39	33	0.03	7	6	2	147.17	111.61	3.36	4.07	5.47	3.04	4.57	4.1	-5.76	0.000886	1.72e-06	Moderately soluble	-6.12	0.000392	7.61e-07	Poorly soluble	-11.17	3.52e-09	6.82e-12	Insoluble	Low	No	No	No	Yes	Yes	No	Yes	-6.56	1	2	0	0	0	0.55	0	0	2	3.63
ZINC000095580712	C[C@H](NC(=O)C1(N)CCN(c2ncnc3[nH]ccc23)CC1)c1ccccc1	C20H24N6O	364.44	27	15	0.35	5	4	3	107.99	99.93	2.21	1.76	1.43	1.49	2.02	1.78	-3.29	0.187	0.000513	Soluble	-3.48	0.122	0.000334	Soluble	-5.8	0.000583	1.6e-06	Moderately soluble	High	No	Yes	No	No	No	Yes	Yes	-7.27	0	0	0	0	0	0.55	0	0	1	3.29
ZINC000095580713	C[C@@H](NC(=O)C1(N)CCN(c2ncnc3[nH]ccc23)CC1)c1ccccc1	C20H24N6O	364.44	27	15	0.35	5	4	3	107.99	99.93	2.52	1.76	1.43	1.49	2.02	1.84	-3.29	0.187	0.000513	Soluble	-3.48	0.122	0.000334	Soluble	-5.8	0.000583	1.6e-06	Moderately soluble	High	No	Yes	No	No	No	Yes	Yes	-7.27	0	0	0	0	0	0.55	0	0	1	3.29
ZINC000095580716	C[C@@H](NC(=O)C1(N)CCN(c2ncnc3[nH]ccc23)CC1)c1ccc(Cl)cc1	C20H23ClN6O	398.89	28	15	0.35	5	4	3	113	99.93	2.81	2.39	2.08	1.98	2.66	2.38	-3.89	0.052	0.00013	Soluble	-4.13	0.0296	7.42e-05	Moderately soluble	-6.38	0.000164	4.12e-07	Poorly soluble	High	No	Yes	No	Yes	No	Yes	Yes	-7.04	0	0	0	0	0	0.55	0	0	1	3.36
ZINC000095580724	NC1(C(=O)N[C@@H](Cc2ccccc2)c2ccc(Cl)cc2)CCN(c2ncnc3[nH]ccc23)CC1	C26H27ClN6O	474.99	34	21	0.27	7	4	3	137.49	99.93	3.44	3.98	3.3	3.02	4.08	3.56	-5.29	0.00245	5.16e-06	Moderately soluble	-5.78	0.000789	1.66e-06	Moderately soluble	-8.85	6.79e-07	1.43e-09	Poorly soluble	High	No	Yes	Yes	Yes	Yes	Yes	Yes	-6.37	0	1	0	0	0	0.55	0	0	2	3.82
ZINC000095580725	NC1(C(=O)N[C@H](Cc2ccccc2)c2ccc(Cl)cc2)CCN(c2ncnc3[nH]ccc23)CC1	C26H27ClN6O	474.99	34	21	0.27	7	4	3	137.49	99.93	3.13	3.98	3.3	3.02	4.08	3.5	-5.29	0.00245	5.16e-06	Moderately soluble	-5.78	0.000789	1.66e-06	Moderately soluble	-8.85	6.79e-07	1.43e-09	Poorly soluble	High	No	Yes	No	Yes	Yes	Yes	Yes	-6.37	0	1	0	0	0	0.55	0	0	2	3.82
ZINC000095581123	CC(=O)NC[C@H](NC(=O)C1(N)CCN(c2ncnc3[nH]ccc23)CC1)c1ccc(Cl)cc1	C22H26ClN7O2	455.94	32	15	0.36	8	5	4	125.62	129.03	2.67	1.34	1.2	1.18	2.21	1.72	-3.33	0.213	0.000468	Soluble	-3.65	0.102	0.000223	Soluble	-6.74	8.37e-05	1.84e-07	Poorly soluble	High	No	Yes	No	No	No	Yes	Yes	-8.13	0	0	0	0	0	0.55	0	0	2	3.7
ZINC000095581124	CC(=O)NC[C@@H](NC(=O)C1(N)CCN(c2ncnc3[nH]ccc23)CC1)c1ccc(Cl)cc1	C22H26ClN7O2	455.94	32	15	0.36	8	5	4	125.62	129.03	2.59	1.34	1.2	1.18	2.21	1.7	-3.33	0.213	0.000468	Soluble	-3.65	0.102	0.000223	Soluble	-6.74	8.37e-05	1.84e-07	Poorly soluble	High	No	Yes	No	No	No	Yes	Yes	-8.13	0	0	0	0	0	0.55	0	0	2	3.7
ZINC000095581134	CS(=O)(=O)NC[C@H](NC(=O)C1(N)CCN(c2ncnc3[nH]ccc23)CC1)c1ccc(Cl)cc1	C21H26ClN7O3S	491.99	33	15	0.38	8	7	4	129.58	154.48	1.73	1.13	1.69	0.53	1.12	1.24	-3.41	0.191	0.000388	Soluble	-3.97	0.053	0.000108	Soluble	-6.67	0.000104	2.12e-07	Poorly soluble	Low	No	Yes	No	No	No	No	Yes	-8.5	0	1	1	1	1	0.55	0	0	2	3.94
ZINC000095581135	CS(=O)(=O)NC[C@@H](NC(=O)C1(N)CCN(c2ncnc3[nH]ccc23)CC1)c1ccc(Cl)cc1	C21H26ClN7O3S	491.99	33	15	0.38	8	7	4	129.58	154.48	1.89	1.13	1.69	0.53	1.12	1.27	-3.41	0.191	0.000388	Soluble	-3.97	0.053	0.000108	Soluble	-6.67	0.000104	2.12e-07	Poorly soluble	Low	No	Yes	No	No	No	No	Yes	-8.5	0	1	1	1	1	0.55	0	0	2	3.94
ZINC000095581144	C[C@H](NC(=O)C1(N)CCN(c2ncnc3[nH]ccc23)CC1)c1ccc(Cl)cc1	C20H23ClN6O	398.89	28	15	0.35	5	4	3	113	99.93	3.11	2.39	2.08	1.98	2.66	2.44	-3.89	0.052	0.00013	Soluble	-4.13	0.0296	7.42e-05	Moderately soluble	-6.38	0.000164	4.12e-07	Poorly soluble	High	No	Yes	No	Yes	No	Yes	Yes	-7.04	0	0	0	0	0	0.55	0	0	1	3.36
ZINC000095581190	CN(C)CC[C@H](NC(=O)C1(N)CCN(c2ncnc3[nH]ccc23)CC1)c1ccc(Cl)cc1	C23H30ClN7O	455.98	32	15	0.43	8	5	3	130.32	103.17	3.42	2.42	2.01	1.84	2.61	2.46	-4.01	0.0445	9.76e-05	Moderately soluble	-4.23	0.0269	5.9e-05	Moderately soluble	-6.86	6.24e-05	1.37e-07	Poorly soluble	High	No	Yes	No	Yes	No	Yes	Yes	-7.36	0	1	0	0	0	0.55	0	0	2	3.82
ZINC000095581191	CN(C)CC[C@@H](NC(=O)C1(N)CCN(c2ncnc3[nH]ccc23)CC1)c1ccc(Cl)cc1	C23H30ClN7O	455.98	32	15	0.43	8	5	3	130.32	103.17	3.4	2.42	2.01	1.84	2.61	2.46	-4.01	0.0445	9.76e-05	Moderately soluble	-4.23	0.0269	5.9e-05	Moderately soluble	-6.86	6.24e-05	1.37e-07	Poorly soluble	High	No	Yes	No	Yes	No	Yes	Yes	-7.36	0	1	0	0	0	0.55	0	0	2	3.82
ZINC000095581497	NC1(C(=O)N[C@@H](CCN2CCCCC2)c2ccc(Cl)cc2)CCN(c2ncnc3[nH]ccc23)CC1	C26H34ClN7O	496.05	35	15	0.5	8	5	3	146.54	103.17	3.47	3.27	2.56	2.45	3.45	3.04	-4.76	0.00853	1.72e-05	Moderately soluble	-5.11	0.00384	7.74e-06	Moderately soluble	-7.43	1.82e-05	3.67e-08	Poorly soluble	High	No	Yes	No	Yes	No	Yes	Yes	-7	0	2	0	0	0	0.55	0	0	2	4.09
ZINC000095581525	NC1(C(=O)N[C@@H](CCN2CCCC2)c2ccc(Cl)cc2)CCN(c2ncnc3[nH]ccc23)CC1	C25H32ClN7O	482.02	34	15	0.48	8	5	3	141.73	103.17	3.33	2.91	2.17	2.25	3.22	2.77	-4.46	0.0167	3.46e-05	Moderately soluble	-4.74	0.00882	1.83e-05	Moderately soluble	-7.17	3.25e-05	6.75e-08	Poorly soluble	High	No	Yes	No	Yes	No	Yes	Yes	-7.17	0	2	0	0	0	0.55	0	0	2	3.98
ZINC000095581562	NC1(C(=O)N[C@@H](c2ccccc2)c2ccc(Cl)cc2)CCN(c2ncnc3[nH]ccc23)CC1	C25H25ClN6O	460.96	33	21	0.24	6	4	3	132.68	99.93	2.67	3.69	3.11	2.82	3.68	3.19	-5.1	0.00368	7.99e-06	Moderately soluble	-5.48	0.00153	3.32e-06	Moderately soluble	-8.46	1.62e-06	3.51e-09	Poorly soluble	High	No	Yes	No	Yes	Yes	Yes	Yes	-6.49	0	1	0	0	0	0.55	0	0	2	3.69
ZINC000095581563	NC1(C(=O)N[C@H](c2ccccc2)c2ccc(Cl)cc2)CCN(c2ncnc3[nH]ccc23)CC1	C25H25ClN6O	460.96	33	21	0.24	6	4	3	132.68	99.93	2.82	3.69	3.11	2.82	3.68	3.22	-5.1	0.00368	7.99e-06	Moderately soluble	-5.48	0.00153	3.32e-06	Moderately soluble	-8.46	1.62e-06	3.51e-09	Poorly soluble	High	No	Yes	No	Yes	Yes	Yes	Yes	-6.49	0	1	0	0	0	0.55	0	0	2	3.69
ZINC000095581572	CS(=O)(=O)NCC[C@H](NC(=O)C1(N)CCN(c2ncnc3[nH]ccc23)CC1)c1ccc(Cl)cc1	C22H28ClN7O3S	506.02	34	15	0.41	9	7	4	134.38	154.48	1.83	1.49	2.08	0.74	1.52	1.53	-3.65	0.114	0.000225	Soluble	-4.34	0.0231	4.56e-05	Moderately soluble	-7.06	4.38e-05	8.65e-08	Poorly soluble	Low	No	Yes	No	No	No	Yes	Yes	-8.33	1	2	1	1	1	0.55	0	0	2	4
ZINC000095581573	CS(=O)(=O)NCC[C@@H](NC(=O)C1(N)CCN(c2ncnc3[nH]ccc23)CC1)c1ccc(Cl)cc1	C22H28ClN7O3S	506.02	34	15	0.41	9	7	4	134.38	154.48	1.89	1.49	2.08	0.74	1.52	1.54	-3.65	0.114	0.000225	Soluble	-4.34	0.0231	4.56e-05	Moderately soluble	-7.06	4.38e-05	8.65e-08	Poorly soluble	Low	No	Yes	No	No	No	Yes	Yes	-8.33	1	2	1	1	1	0.55	0	0	2	4
ZINC000095581652	COc1ccc([C@H](C)NC(=O)C2(N)CCN(c3ncnc4[nH]ccc34)CC2)cc1OC	C22H28N6O3	424.5	31	15	0.41	7	6	3	120.98	118.39	2.66	1.71	1.45	0.9	2.14	1.77	-3.45	0.152	0.000359	Soluble	-3.81	0.0655	0.000154	Soluble	-6	0.000423	9.95e-07	Poorly soluble	High	No	Yes	No	No	No	Yes	Yes	-7.68	0	0	0	0	0	0.55	0	0	1	3.7
ZINC000095581653	COc1ccc([C@@H](C)NC(=O)C2(N)CCN(c3ncnc4[nH]ccc34)CC2)cc1OC	C22H28N6O3	424.5	31	15	0.41	7	6	3	120.98	118.39	2.61	1.71	1.45	0.9	2.14	1.76	-3.45	0.152	0.000359	Soluble	-3.81	0.0655	0.000154	Soluble	-6	0.000423	9.95e-07	Poorly soluble	High	No	Yes	No	No	No	Yes	Yes	-7.68	0	0	0	0	0	0.55	0	0	1	3.7
ZINC000095581933	COCC[C@H](NC(=O)C1(N)CCN(c2ncnc3[nH]ccc23)CC1)c1ccc(Cl)cc1	C22H27ClN6O2	442.94	31	15	0.41	8	5	3	123.7	109.16	2.67	2.24	2.1	1.63	2.98	2.32	-3.83	0.0659	0.000149	Soluble	-4.17	0.0301	6.79e-05	Moderately soluble	-6.89	5.65e-05	1.28e-07	Poorly soluble	High	No	Yes	No	Yes	No	Yes	Yes	-7.41	0	0	0	0	0	0.55	0	0	2	3.68
ZINC000095581934	COCC[C@@H](NC(=O)C1(N)CCN(c2ncnc3[nH]ccc23)CC1)c1ccc(Cl)cc1	C22H27ClN6O2	442.94	31	15	0.41	8	5	3	123.7	109.16	3.18	2.24	2.1	1.63	2.98	2.42	-3.83	0.0659	0.000149	Soluble	-4.17	0.0301	6.79e-05	Moderately soluble	-6.89	5.65e-05	1.28e-07	Poorly soluble	High	No	Yes	No	Yes	No	Yes	Yes	-7.41	0	0	0	0	0	0.55	0	0	2	3.68
ZINC000095581969	NC1(C(=O)N[C@@H](c2ccc(Cl)cc2)C2CC2)CCN(c2ncnc3[nH]ccc23)CC1	C22H25ClN6O	424.93	30	15	0.41	6	4	3	120.5	99.93	2.73	2.77	2.41	2.41	3.09	2.68	-4.19	0.0272	6.4e-05	Moderately soluble	-4.52	0.0127	2.99e-05	Moderately soluble	-6.57	0.000113	2.67e-07	Poorly soluble	High	No	Yes	Yes	Yes	No	Yes	Yes	-6.93	0	0	0	0	0	0.55	0	0	1	3.54
ZINC000095581970	NC1(C(=O)N[C@H](c2ccc(Cl)cc2)C2CC2)CCN(c2ncnc3[nH]ccc23)CC1	C22H25ClN6O	424.93	30	15	0.41	6	4	3	120.5	99.93	3.19	2.77	2.41	2.41	3.09	2.77	-4.19	0.0272	6.4e-05	Moderately soluble	-4.52	0.0127	2.99e-05	Moderately soluble	-6.57	0.000113	2.67e-07	Poorly soluble	High	No	Yes	Yes	Yes	No	Yes	Yes	-6.93	0	0	0	0	0	0.55	0	0	1	3.54
ZINC000095582061	N[C@@H](Cc1ccccc1)C(=O)N1CCN(c2nc(N3CCOCC3)nc(-n3c(C(F)F)nc4ccccc43)n2)CC1	C28H31F2N9O2	563.6	41	21	0.39	8	9	1	158.52	118.53	4.03	3.03	1.58	1.66	1.74	2.41	-5.09	0.00454	8.05e-06	Moderately soluble	-5.18	0.00368	6.54e-06	Moderately soluble	-6.37	0.000243	4.31e-07	Poorly soluble	High	No	Yes	No	No	Yes	Yes	Yes	-7.59	2	3	0	0	0	0.17	0	0	2	4.42
ZINC000095582330	NC1(C(=O)N[C@H](CCCN2CCCCC2)c2ccc(Cl)cc2)CCN(c2ncnc3[nH]ccc23)CC1	C27H36ClN7O	510.07	36	15	0.52	9	5	3	151.35	103.17	3.84	3.62	2.95	2.65	3.85	3.38	-5	0.00513	1.01e-05	Moderately soluble	-5.47	0.00171	3.36e-06	Moderately soluble	-7.82	7.67e-06	1.5e-08	Poorly soluble	High	No	Yes	No	Yes	No	Yes	Yes	-6.84	1	3	0	0	0	0.55	0	0	3	4.21
ZINC000095582331	NC1(C(=O)N[C@@H](CCCN2CCCCC2)c2ccc(Cl)cc2)CCN(c2ncnc3[nH]ccc23)CC1	C27H36ClN7O	510.07	36	15	0.52	9	5	3	151.35	103.17	3.71	3.62	2.95	2.65	3.85	3.35	-5	0.00513	1.01e-05	Moderately soluble	-5.47	0.00171	3.36e-06	Moderately soluble	-7.82	7.67e-06	1.5e-08	Poorly soluble	High	No	Yes	No	Yes	No	Yes	Yes	-6.84	1	3	0	0	0	0.55	0	0	3	4.21
ZINC000095582374	CN(C)CCC[C@H](NC(=O)C1(N)CCN(c2ncnc3[nH]ccc23)CC1)c1ccc(Cl)cc1	C24H32ClN7O	470.01	33	15	0.46	9	5	3	135.13	103.17	3.28	2.78	2.4	2.04	3.01	2.7	-4.25	0.0266	5.65e-05	Moderately soluble	-4.6	0.0117	2.5e-05	Moderately soluble	-7.25	2.62e-05	5.57e-08	Poorly soluble	High	No	Yes	No	Yes	No	Yes	Yes	-7.19	0	1	0	0	0	0.55	0	0	2	3.93
ZINC000095582375	CN(C)CCC[C@@H](NC(=O)C1(N)CCN(c2ncnc3[nH]ccc23)CC1)c1ccc(Cl)cc1	C24H32ClN7O	470.01	33	15	0.46	9	5	3	135.13	103.17	3.37	2.78	2.4	2.04	3.01	2.72	-4.25	0.0266	5.65e-05	Moderately soluble	-4.6	0.0117	2.5e-05	Moderately soluble	-7.25	2.62e-05	5.57e-08	Poorly soluble	High	No	Yes	No	Yes	No	Yes	Yes	-7.19	0	1	0	0	0	0.55	0	0	2	3.93
ZINC000095582866	C[C@H](NC(=O)C1(N)CCN(c2ncnc3[nH]ccc23)CC1)c1ccc(F)cc1	C20H23FN6O	382.43	28	15	0.35	5	5	3	107.95	99.93	2.83	1.86	1.99	1.87	2.44	2.2	-3.45	0.136	0.000355	Soluble	-3.58	0.101	0.000263	Soluble	-6.06	0.000332	8.67e-07	Poorly soluble	High	No	Yes	No	No	No	Yes	Yes	-7.31	0	0	0	0	0	0.55	0	0	1	3.37
ZINC000095582867	C[C@@H](NC(=O)C1(N)CCN(c2ncnc3[nH]ccc23)CC1)c1ccc(F)cc1	C20H23FN6O	382.43	28	15	0.35	5	5	3	107.95	99.93	2.8	1.86	1.99	1.87	2.44	2.19	-3.45	0.136	0.000355	Soluble	-3.58	0.101	0.000263	Soluble	-6.06	0.000332	8.67e-07	Poorly soluble	High	No	Yes	No	No	No	Yes	Yes	-7.31	0	0	0	0	0	0.55	0	0	1	3.37
ZINC000095583188	CC[C@H](NC(=O)C1(N)CCN(c2ncnc3[nH]ccc23)CC1)c1ccc(Cl)cc1	C21H25ClN6O	412.92	29	15	0.38	6	4	3	117.81	99.93	3.03	2.92	2.47	2.2	3.05	2.73	-4.23	0.0245	5.94e-05	Moderately soluble	-4.68	0.00863	2.09e-05	Moderately soluble	-6.78	6.9e-05	1.67e-07	Poorly soluble	High	No	Yes	No	Yes	No	Yes	Yes	-6.75	0	0	0	0	0	0.55	0	0	1	3.48
ZINC000095583189	CC[C@@H](NC(=O)C1(N)CCN(c2ncnc3[nH]ccc23)CC1)c1ccc(Cl)cc1	C21H25ClN6O	412.92	29	15	0.38	6	4	3	117.81	99.93	3.1	2.92	2.47	2.2	3.05	2.75	-4.23	0.0245	5.94e-05	Moderately soluble	-4.68	0.00863	2.09e-05	Moderately soluble	-6.78	6.9e-05	1.67e-07	Poorly soluble	High	No	Yes	No	Yes	No	Yes	Yes	-6.75	0	0	0	0	0	0.55	0	0	1	3.48
ZINC000095583503	NC(=O)[C@@H](NC(=O)C1(N)CCN(c2ncnc3[nH]ccc23)CC1)c1ccc(Cl)cc1	C20H22ClN7O2	427.89	30	15	0.3	6	5	4	115.91	143.02	2.07	1.14	0.55	0.75	1.36	1.17	-3.19	0.279	0.000653	Soluble	-3.74	0.0783	0.000183	Soluble	-5.56	0.00118	2.75e-06	Moderately soluble	Low	No	Yes	No	No	No	No	No	-8.1	0	0	1	1	0	0.55	0	0	1	3.49
[truncated: 246 more rows]

## Sheet: MDM2_hits
Prediction of ADMET, pharmacokinetic, drug-likeness, and medicinal friendliness score of compound hits docked to MDM2.
[truncated: 687 more rows]

## Sheet: Docking energy_AKT1 hits
Ligand	Target (AKT1)	Binding Energy (kcal/mol)
[truncated: 1,439 more rows]

[truncated: 1 more sheets: Docking energy_MDM2 hits]
